# Supplementary material for: Cold-inducible RNA-binding protein (CIRBP) adjusts clock-gene expression and REM-sleep recovery following sleep deprivation
Source: eLife. 2019 Feb 5;8:e43400. doi: 10.7554/eLife.43400 (PMC6379088; doi:10.7554/eLife.43400)
Supplement: Figure 1—source data 1. [file elife-43400-fig1-data1.xlsx]

## Sheet: Sheet1
micro-array signal x 100; taken from GSE 9442 from Maret et al., 2007
BASELINE		B6_repl1	B6_repl2	B6_repl3	AK_repl1	AK_repl2	AK_repl3	D2_repl1	D2_repl2	D2_repl3
	0	1.90274	1.84135	1.85322	2.20327	1.71269	1.52937	1.85836	1.44045	1.53509
	6	3.17473	3.19801	3.48575	2.90436	3.70855	3.62089	2.86529	2.89746	3.78474
	12	3.31124	2.70404	3.14129	3.00245	3.08322	3.66391	3.04192	3.13875	3.4685
	18	2.07784	1.72633	1.54506	1.71493	1.52298	1.73442	1.70975	1.48048	1.78109
SLEEP DEPRIVATION
	0	1.18315	0.941213	1.18113	1.42443	1.7227	1.26999	1.1857	1.28532	1.08327
	6	1.06764	1.51332	1.44601	1.308	1.44155	1.31718	1.23572	1.65956	1.27281
	12	1.84121	1.63619	1.82499	1.96483	1.79207	1.76318	1.57551	1.56703	1.94662
	18	1.64676	1.47499	1.38123	1.60789	1.51213	1.51798	1.7212		1.43642
