# Supplementary material for: Cold-inducible RNA-binding protein (CIRBP) adjusts clock-gene expression and REM-sleep recovery following sleep deprivation
Source: eLife. 2019 Feb 5;8:e43400. doi: 10.7554/eLife.43400 (PMC6379088; doi:10.7554/eLife.43400)
Supplement: Figure 2—source data 1. [file elife-43400-fig2-data1.xlsx]

## Sheet: Fig2-A
	sleep-wake state: 2 = wake, 1 = NREM, 0 = REM
	sleep-wake state and activity are given per minute; Tcx per 4-s epochs
BL1						BL2						SD+REC1						REC2
ZT	sleep-wake state	LMA	ZT	Tcx		ZT	sleep-wake state	LMA	ZT	Tcx		ZT	sleep-wake state	LMA	ZT	Tcx		ZT	sleep-wake state	LMA	ZT	Tcx
0	2	0	0.001111			0	2	0	0.001111	35.4815		0	2	3	0.001111	36.6496		0	1	1	0.001111	35.2121
0.0166667	2	0	0.002222			0.0166667	1	0	0.002222	35.4561		0.0166667	2	1	0.002222	36.6411		0.0166667	1	0	0.002222	35.2067
0.0333333	2	0	0.003333	36.3045		0.0333333	1	0	0.003333	35.4334		0.0333333	2	0	0.003333	36.6455		0.0333333	1	0	0.003333	35.2035
0.05	2	0	0.004444	36.2809		0.05	1	0	0.004444	35.4233		0.05	2	0	0.004444	36.6566		0.05	1	0	0.004444	35.2017
0.0666667	2	0	0.005556	36.2649		0.0666667	1	0	0.005556	35.4069		0.0666667	2	1	0.005556	36.639		0.0666667	1	0	0.005556	35.1964
0.0833334	2	0	0.006667	36.2528		0.0833334	1	0	0.006667	35.3936		0.0833334	2	0	0.006667	36.6122		0.0833334	1	0	0.006667	35.1921
0.1	2	0	0.007778	36.2574		0.1	1	0	0.007778	35.392		0.1	2	0	0.007778	36.5939		0.1	1	0	0.007778	35.1828
0.116667	2	1	0.008889	36.2685		0.116667	1	0	0.008889	35.3882		0.116667	2	0	0.008889	36.5784		0.116667	1	0	0.008889	35.1624
0.133333	2	0	0.01	36.2878		0.133333	1	0	0.01	35.3828		0.133333	2	1	0.01	36.5548		0.133333	1	0	0.01	35.1536
0.15	2	1	0.011111	36.2945		0.15	1	0	0.011111	35.3797		0.15	2	0	0.011111	36.5255		0.15	0	0	0.011111	35.1541
0.166667	2	1	0.012222	36.2848		0.166667	1	0	0.012222	35.3694		0.166667	2	0	0.012222	36.5049		0.166667	2	2	0.012222	35.1571
0.183333	2	0	0.013333	36.2873		0.183333	1	0	0.013333	35.3488		0.183333	2	1	0.013333	36.4842		0.183333	1	0	0.013333	35.1722
0.2	2	1	0.014444	36.2848		0.2	1	0	0.014444	35.334		0.2	2	0	0.014444	36.4572		0.2	1	0	0.014444	35.1775
0.216667	2	0	0.015556	36.292		0.216667	1	0	0.015556	35.3302		0.216667	2	3	0.015556	36.4294		0.216667	1	0	0.015556	35.1807
0.233333	2	0	0.016667	36.2988		0.233333	1	0	0.016667	35.325		0.233333	2	1	0.016667	36.3967		0.233333	2	0	0.016667	35.1877
0.25	2	0	0.017778	36.3023		0.25	1	0	0.017778	35.3133		0.25	2	0	0.017778	36.3666		0.25	2	0	0.017778	35.1887
0.266667	2	1	0.018889	36.3064		0.266667	1	0	0.018889	35.2895		0.266667	2	2	0.018889	36.3452		0.266667	1	0	0.018889	35.185
0.283333	2	1	0.02	36.3014		0.283333	0	0	0.02	35.2802		0.283333	2	0	0.02	36.3239		0.283333	1	0	0.02	35.1843
0.3	2	1	0.021111	36.301		0.3	1	0	0.021111	35.2803		0.3	2	2	0.021111	36.3025		0.3	1	0	0.021111	35.1936
0.316667	2	1	0.022222	36.3042		0.316667	1	0	0.022222	35.2797		0.316667	2	0	0.022222	36.2874		0.316667	1	0	0.022222	35.2017
0.333333	2	0	0.023333	36.2938		0.333333	1	0	0.023333	35.2718		0.333333	2	2	0.023333	36.277		0.333333	1	0	0.023333	35.2071
0.35	2	1	0.024444	36.2872		0.35	0	0	0.024444	35.2582		0.35	2	1	0.024444	36.2693		0.35	1	0	0.024444	35.21
0.366667	1	0	0.025556	36.2862		0.366667	0	0	0.025556	35.2471		0.366667	2	0	0.025556	36.2628		0.366667	0	0	0.025556	35.2041
0.383333	1	0	0.026667	36.2796		0.383333	1	0	0.026667	35.2427		0.383333	2	1	0.026667	36.2609		0.383333	1	0	0.026667	35.2009
0.4	1	0	0.027778	36.2841		0.4	1	0	0.027778	35.2399		0.4	2	0	0.027778	36.2551		0.4	1	0	0.027778	35.1983
0.416667	1	0	0.028889	36.2912		0.416667	1	0	0.028889	35.2401		0.416667	2	1	0.028889	36.2445		0.416667	1	0	0.028889	35.1957
0.433333	1	0	0.03	36.3083		0.433333	1	0	0.03	35.2408		0.433333	2	1	0.03	36.2427		0.433333	1	0	0.03	35.1934
0.45	1	0	0.031111	36.3203		0.45	1	0	0.031111	35.2367		0.45	2	1	0.031111	36.2522		0.45	1	0	0.031111	35.1909
0.466667	1	0	0.032222	36.3343		0.466667	1	0	0.032222	35.2373		0.466667	2	2	0.032222	36.2556		0.466667	1	0	0.032222	35.186
0.483333	1	0	0.033333	36.3431		0.483333	1	0	0.033333	35.2329		0.483333	2	1	0.033333	36.2613		0.483333	1	0	0.033333	35.1752
0.5	1	0	0.034444	36.3565		0.5	2	0	0.034444	35.2211		0.5	2	1	0.034444	36.2526		0.5	1	0	0.034444	35.1693
0.516667	1	0	0.035556	36.3598		0.516667	1	0	0.035556	35.1953		0.516667	2	0	0.035556	36.2553		0.516667	1	0	0.035556	35.1762
0.533333	1	0	0.036667	36.35		0.533333	1	0	0.036667	35.1742		0.533333	2	2	0.036667	36.2573		0.533333	1	0	0.036667	35.1783
0.55	1	0	0.037778	36.3429		0.55	1	0	0.037778	35.1617		0.55	2	0	0.037778	36.253		0.55	1	0	0.037778	35.179
0.566667	1	0	0.038889	36.3414		0.566667	1	0	0.038889	35.1399		0.566667	2	0	0.038889	36.2511		0.566667	1	0	0.038889	35.1832
0.583333	1	0	0.04	36.3306		0.583333	1	0	0.04	35.1281		0.583333	2	1	0.04	36.2478		0.583333	1	0	0.04	35.1841
0.6	0	0	0.041111	36.3255		0.6	1	1	0.041111	35.1218		0.6	2	2	0.041111	36.2503		0.6	1	0	0.041111	35.1896
0.616667	1	0	0.042222	36.3316		0.616667	2	1	0.042222	35.1112		0.616667	2	4	0.042222	36.2549		0.616667	1	0	0.042222	35.1874
0.633333	1	0	0.043333	36.3432		0.633333	1	0	0.043333	35.0989		0.633333	2	1	0.043333	36.2695		0.633333	1	0	0.043333	35.1732
0.65	1	0	0.044444	36.3504		0.65	2	0	0.044444	35.0919		0.65	2	1	0.044444	36.2577		0.65	2	0	0.044444	35.1616
0.666667	1	0	0.045556	36.3546		0.666667	2	0	0.045556	35.0875		0.666667	2	0	0.045556	36.2475		0.666667	1	0	0.045556	35.1431
0.683333	1	0	0.046667	36.3544		0.683333	2	0	0.046667	35.0868		0.683333	2	0	0.046667	36.2519		0.683333	1	0	0.046667	35.1322
0.7	1	0	0.047778	36.3499		0.7	2	0	0.047778	35.0855		0.7	2	2	0.047778	36.2447		0.7	1	0	0.047778	35.1232
0.716667	1	0	0.048889	36.3489		0.716667	2	0	0.048889	35.0761		0.716667	2	0	0.048889	36.239		0.716667	1	0	0.048889	35.1218
0.733333	1	0	0.05	36.3484		0.733333	2	0	0.05	35.0589		0.733333	2	0	0.05	36.2429		0.733333	1	0	0.05	35.1223
0.75	1	0	0.051111	36.3487		0.75	2	0	0.051111	35.0396		0.75	2	2	0.051111	36.2519		0.75	1	0	0.051111	35.1223
0.766667	2	1	0.052222	36.3386		0.766667	2	0	0.052222	35.0268		0.766667	2	2	0.052222	36.2638		0.766667	1	0	0.052222	35.1235
0.783333	1	0	0.053333	36.3268		0.783333	2	0	0.053333	35.016		0.783333	2	2	0.053333	36.2811		0.783333	1	0	0.053333	35.123
0.8	1	0	0.054444	36.3174		0.8	2	0	0.054444	35.0039		0.8	2	1	0.054444	36.2951		0.8	1	0	0.054444	35.1266
0.816667	1	0	0.055556	36.3135		0.816667	2	0	0.055556	34.9923		0.816667	2	1	0.055556	36.3076		0.816667	1	0	0.055556	35.1272
0.833333	1	0	0.056667	36.3161		0.833333	2	2	0.056667	34.9782		0.833333	2	0	0.056667	36.3194		0.833333	0	0	0.056667	35.1301
0.85	1	0	0.057778	36.325		0.85	2	0	0.057778	34.9716		0.85	2	1	0.057778	36.326		0.85	1	0	0.057778	35.1289
0.866667	1	0	0.058889	36.3318		0.866667	2	2	0.058889	34.9742		0.866667	2	0	0.058889	36.3416		0.866667	1	0	0.058889	35.1314
0.883334	1	0	0.06	36.3402		0.883334	2	0	0.06	34.9761		0.883334	2	1	0.06	36.3618		0.883334	1	0	0.06	35.1334
0.9	0	0	0.061111	36.3464		0.9	2	2	0.061111	34.9817		0.9	2	0	0.061111	36.3851		0.9	1	0	0.061111	35.1343
0.916667	1	0	0.062222	36.3503		0.916667	2	1	0.062222	34.9816		0.916667	2	0	0.062222	36.4124		0.916667	1	0	0.062222	35.1357
0.933334	1	0	0.063333	36.3448		0.933334	2	0	0.063333	34.9881		0.933334	2	1	0.063333	36.4383		0.933334	1	0	0.063333	35.1421
0.95	1	0	0.064444	36.338		0.95	2	0	0.064444	34.9752		0.95	2	0	0.064444	36.4621		0.95	1	0	0.064444	35.1775
0.966667	1	0	0.065556	36.338		0.966667	2	0	0.065556	34.978		0.966667	2	1	0.065556	36.4948		0.966667	2	2	0.065556	35.2243
0.983334	1	0	0.066667	36.3463		0.983334	1	0	0.066667	34.9856		0.983334	2	2	0.066667	36.5271		0.983334	2	0	0.066667	35.2767
1	1	0	0.067778	36.3642		1	1	0	0.067778	34.9892		1	2	1	0.067778	36.5476		1	2	1	0.067778	35.3243
1.01667	1	0	0.068889	36.3621		1.01667	1	0	0.068889	34.9927		1.01667	2	0	0.068889	36.5737		1.01667	2	0	0.068889	35.3693
1.03333	1	0	0.07	36.3598		1.03333	1	0	0.07	34.993		1.03333	2	1	0.07	36.5983		1.03333	2	0	0.07	35.3695
1.05	1	0	0.071111	36.3631		1.05	1	0	0.071111	34.9939		1.05	2	0	0.071111	36.6128		1.05	2	1	0.071111	35.3412
1.06667	2	0	0.072222	36.3507		1.06667	1	0	0.072222	34.9892		1.06667	2	1	0.072222	36.6213		1.06667	2	0	0.072222	35.3115
1.08333	1	0	0.073333	36.3182		1.08333	1	0	0.073333	34.9777		1.08333	2	1	0.073333	36.6292		1.08333	2	1	0.073333	35.29
1.1	1	0	0.074444	36.3091		1.1	1	0	0.074444	34.9642		1.1	2	1	0.074444	36.6466		1.1	2	5	0.074444	35.2681
1.11667	0	0	0.075556	36.3155		1.11667	1	1	0.075556	34.9557		1.11667	2	1	0.075556	36.6691		1.11667	2	0	0.075556	35.2518
1.13333	1	0	0.076667	36.3242		1.13333	1	0	0.076667	34.9509		1.13333	2	0	0.076667	36.6878		1.13333	2	0	0.076667	35.2413
1.15	2	1	0.077778	36.3404		1.15	1	0	0.077778	34.9493		1.15	2	3	0.077778	36.6976		1.15	2	1	0.077778	35.237
1.16667	2	0	0.078889	36.3588		1.16667	1	0	0.078889	34.9383		1.16667	2	1	0.078889	36.7187		1.16667	2	1	0.078889	35.2274
1.18333	2	0	0.08	36.3761		1.18333	1	0	0.08	34.9284		1.18333	2	0	0.08	36.7368		1.18333	2	0	0.08	35.2227
1.2	2	0	0.081111	36.3987		1.2	0	0	0.081111	34.9266		1.2	2	0	0.081111	36.7568		1.2	2	0	0.081111	35.2204
1.21667	2	1	0.082222	36.4091		1.21667	1	0	0.082222	34.9233		1.21667	2	0	0.082222	36.7794		1.21667	2	0	0.082222	35.2182
1.23333	2	0	0.083333	36.4015		1.23333	1	0	0.083333	34.9175		1.23333	2	0	0.083333	36.7977		1.23333	2	0	0.083333	35.2197
1.25	2	0	0.084444	36.3822		1.25	1	1	0.084444	34.9139		1.25	2	2	0.084444	36.8206		1.25	2	0	0.084444	35.2235
1.26667	2	0	0.085556	36.3625		1.26667	1	0	0.085556	34.9085		1.26667	2	0	0.085556	36.8372		1.26667	2	3	0.085556	35.2239
1.28333	2	0	0.086667	36.3458		1.28333	1	0	0.086667	34.9015		1.28333	2	0	0.086667	36.8332		1.28333	2	0	0.086667	35.2208
1.3	2	2	0.087778	36.3372		1.3	1	0	0.087778	34.8936		1.3	2	0	0.087778	36.8115		1.3	2	0	0.087778	35.2125
1.31667	2	0	0.088889	36.3391		1.31667	1	0	0.088889	34.8742		1.31667	2	1	0.088889	36.7893		1.31667	1	0	0.088889	35.2019
1.33333	2	0	0.09	36.3591		1.33333	1	0	0.09	34.8596		1.33333	2	1	0.09	36.7806		1.33333	1	0	0.09	35.1954
1.35	2	0	0.091111	36.3878		1.35	1	0	0.091111	34.8409		1.35	2	1	0.091111	36.7803		1.35	1	0	0.091111	35.1945
1.36667	2	0	0.092222	36.4099		1.36667	1	0	0.092222	34.8319		1.36667	2	1	0.092222	36.7779		1.36667	1	0	0.092222	35.1944
1.38333	2	0	0.093333	36.4333		1.38333	1	0	0.093333	34.8289		1.38333	2	0	0.093333	36.7786		1.38333	1	0	0.093333	35.1918
1.4	2	0	0.094444	36.4456		1.4	1	0	0.094444	34.8237		1.4	2	0	0.094444	36.7899		1.4	1	0	0.094444	35.1998
1.41667	2	0	0.095556	36.4509		1.41667	1	0	0.095556	34.8214		1.41667	2	0	0.095556	36.7939		1.41667	2	0	0.095556	35.1957
1.43333	2	0	0.096667	36.4503		1.43333	1	0	0.096667	34.8246		1.43333	2	3	0.096667	36.8149		1.43333	1	0	0.096667	35.1826
1.45	2	3	0.097778	36.4552		1.45	0	0	0.097778	34.8232		1.45	2	0	0.097778	36.8355		1.45	1	0	0.097778	35.1705
1.46667	2	0	0.098889	36.4566		1.46667	1	3	0.098889	34.8242		1.46667	2	1	0.098889	36.8532		1.46667	1	0	0.098889	35.1637
1.48333	2	0	0.1	36.451		1.48333	1	0	0.1	34.8238		1.48333	2	1	0.1	36.8587		1.48333	1	0	0.1	35.1632
1.5	2	0	0.101111	36.4404		1.5	1	0	0.101111	34.8197		1.5	2	0	0.101111	36.868		1.5	1	0	0.101111	35.1569
1.51667	2	0	0.102222	36.4327		1.51667	1	0	0.102222	34.8139		1.51667	2	4	0.102222	36.8831		1.51667	1	0	0.102222	35.1433
1.53333	2	0	0.103333	36.423		1.53333	1	0	0.103333	34.8125		1.53333	2	1	0.103333	36.9032		1.53333	1	0	0.103333	35.1357
1.55	2	0	0.104444	36.4186		1.55	1	0	0.104444	34.806		1.55	2	1	0.104444	36.9238		1.55	1	0	0.104444	35.1293
1.56667	2	0	0.105556	36.4109		1.56667	1	0	0.105556	34.7848		1.56667	2	0	0.105556	36.9279		1.56667	1	0	0.105556	35.125
1.58333	2	0	0.106667	36.3986		1.58333	2	0	0.106667	34.771		1.58333	2	2	0.106667	36.9254		1.58333	1	0	0.106667	35.1239
1.6	2	0	0.107778	36.3914		1.6	2	0	0.107778	34.7588		1.6	2	1	0.107778	36.9312		1.6	1	0	0.107778	35.1322
1.61667	2	0	0.108889	36.3944		1.61667	2	0	0.108889	34.7512		1.61667	2	0	0.108889	36.9297		1.61667	1	0	0.108889	35.1386
1.63333	2	0	0.11	36.4058		1.63333	2	0	0.11	34.7475		1.63333	2	0	0.11	36.9141		1.63333	1	0	0.11	35.1477
1.65	2	0	0.111111	36.4158		1.65	2	2	0.111111	34.7504		1.65	2	0	0.111111	36.8909		1.65	1	0	0.111111	35.1614
1.66667	1	0	0.112222	36.4212		1.66667	2	0	0.112222	34.7542		1.66667	2	0	0.112222	36.8718		1.66667	1	0	0.112222	35.1639
1.68333	1	0	0.113333	36.4301		1.68333	1	0	0.113333	34.7538		1.68333	2	0	0.113333	36.8643		1.68333	0	0	0.113333	35.1706
1.7	1	0	0.114444	36.4386		1.7	1	0	0.114444	34.756		1.7	2	2	0.114444	36.8674		1.7	0	0	0.114444	35.1706
1.71667	1	0	0.115556	36.4433		1.71667	1	0	0.115556	34.7616		1.71667	2	0	0.115556	36.8958		1.71667	0	0	0.115556	35.1677
1.73333	1	0	0.116667	36.4482		1.73333	1	0	0.116667	34.7606		1.73333	2	0	0.116667	36.9135		1.73333	1	0	0.116667	35.1623
1.75	1	0	0.117778	36.4503		1.75	1	0	0.117778	34.7516		1.75	2	0	0.117778	36.9093		1.75	1	0	0.117778	35.1536
1.76667	1	0	0.118889	36.4446		1.76667	1	0	0.118889	34.7329		1.76667	2	0	0.118889	36.9032		1.76667	1	0	0.118889	35.1484
1.78333	1	0	0.12	36.4385		1.78333	1	0	0.12	34.7177		1.78333	2	3	0.12	36.8972		1.78333	1	0	0.12	35.1468
1.8	1	0	0.121111	36.4344		1.8	1	0	0.121111	34.7026		1.8	2	3	0.121111	36.8948		1.8	1	0	0.121111	35.1497
1.81667	1	0	0.122222	36.4318		1.81667	1	0	0.122222	34.695		1.81667	2	2	0.122222	36.8929		1.81667	1	0	0.122222	35.1557
1.83333	0	0	0.123333	36.4239		1.83333	1	0	0.123333	34.6849		1.83333	2	0	0.123333	36.901		1.83333	1	0	0.123333	35.1618
1.85	0	0	0.124444	36.4282		1.85	1	0	0.124444	34.6819		1.85	2	1	0.124444	36.9248		1.85	1	0	0.124444	35.164
1.86667	2	0	0.125556	36.4297		1.86667	1	0	0.125556	34.6853		1.86667	2	1	0.125556	36.9502		1.86667	1	0	0.125556	35.1698
1.88333	2	0	0.126667	36.4233		1.88333	1	0	0.126667	34.6895		1.88333	2	1	0.126667	36.9828		1.88333	1	0	0.126667	35.1802
1.9	1	0	0.127778	36.4096		1.9	1	0	0.127778	34.6923		1.9	2	1	0.127778	37.0101		1.9	1	0	0.127778	35.1825
1.91667	1	0	0.128889	36.392		1.91667	1	0	0.128889	34.6929		1.91667	2	0	0.128889	37.022		1.91667	1	0	0.128889	35.1876
1.93333	1	0	0.13	36.3864		1.93333	0	0	0.13	34.6921		1.93333	2	1	0.13	37.0319		1.93333	1	0	0.13	35.1945
1.95	1	0	0.131111	36.3786		1.95	0	0	0.131111	34.6949		1.95	2	3	0.131111	37.0527		1.95	1	0	0.131111	35.1786
1.96667	1	0	0.132222	36.3666		1.96667	0	0	0.132222	34.6946		1.96667	2	1	0.132222	37.0797		1.96667	0	0	0.132222	35.1631
1.98333	1	0	0.133333	36.3606		1.98333	1	0	0.133333	34.6874		1.98333	2	1	0.133333	37.0802		1.98333	1	3	0.133333	35.1541
2	1	0	0.134444	36.3614		2	1	0	0.134444	34.6842		2	2	0	0.134444	37.0646		2	2	0	0.134444	35.1509
2.01667	1	0	0.135556	36.3588		2.01667	1	0	0.135556	34.6822		2.01667	2	0	0.135556	37.0495		2.01667	2	0	0.135556	35.1506
2.03333	1	0	0.136667	36.3392		2.03333	1	0	0.136667	34.6836		2.03333	2	0	0.136667	37.0321		2.03333	2	0	0.136667	35.147
2.05	1	0	0.137778	36.3194		2.05	1	0	0.137778	34.6716		2.05	2	0	0.137778	37.0243		2.05	2	0	0.137778	35.1487
2.06667	1	0	0.138889	36.3102		2.06667	1	0	0.138889	34.651		2.06667	2	0	0.138889	37.029		2.06667	2	0	0.138889	35.1576
2.08333	1	0	0.14	36.3033		2.08333	1	0	0.14	34.6379		2.08333	2	2	0.14	37.0425		2.08333	2	0	0.14	35.1677
2.1	0	0	0.141111	36.2965		2.1	1	0	0.141111	34.6279		2.1	2	3	0.141111	37.0455		2.1	2	0	0.141111	35.1713
2.11667	0	0	0.142222	36.2939		2.11667	1	0	0.142222	34.6221		2.11667	2	4	0.142222	37.0402		2.11667	1	0	0.142222	35.1585
2.13333	2	0	0.143333	36.2922		2.13333	1	0	0.143333	34.62		2.13333	2	3	0.143333	37.0373		2.13333	2	0	0.143333	35.153
2.15	2	0	0.144444	36.2971		2.15	1	0	0.144444	34.6165		2.15	2	2	0.144444	37.0401		2.15	2	0	0.144444	35.1541
2.16667	1	0	0.145556	36.3001		2.16667	0	0	0.145556	34.6169		2.16667	2	6	0.145556	37.0528		2.16667	2	1	0.145556	35.1574
2.18333	1	0	0.146667	36.3019		2.18333	0	0	0.146667	34.6209		2.18333	2	8	0.146667	37.0588		2.18333	2	0	0.146667	35.1666
2.2	1	0	0.147778	36.3028		2.2	2	0	0.147778	34.6256		2.2	2	5	0.147778	37.0613		2.2	2	0	0.147778	35.1723
2.21667	1	0	0.148889	36.3011		2.21667	2	0	0.148889	34.624		2.21667	2	1	0.148889	37.0666		2.21667	2	1	0.148889	35.1796
2.23333	1	0	0.15	36.2983		2.23333	2	0	0.15	34.613		2.23333	2	0	0.15	37.0614		2.23333	2	0	0.15	35.1882
2.25	1	0	0.151111	36.3019		2.25	2	0	0.151111	34.6045		2.25	2	1	0.151111	37.0669		2.25	2	0	0.151111	35.1905
2.26667	1	0	0.152222	36.3123		2.26667	2	0	0.152222	34.601		2.26667	2	2	0.152222	37.0787		2.26667	2	0	0.152222	35.1918
2.28333	1	0	0.153333	36.328		2.28333	2	0	0.153333	34.6026		2.28333	2	0	0.153333	37.1063		2.28333	1	0	0.153333	35.1943
2.3	1	0	0.154444	36.3449		2.3	2	1	0.154444	34.6017		2.3	2	1	0.154444	37.1294		2.3	1	0	0.154444	35.2076
2.31667	1	0	0.155556	36.3605		2.31667	2	0	0.155556	34.6029		2.31667	2	1	0.155556	37.1604		2.31667	1	0	0.155556	35.2169
2.33333	1	0	0.156667	36.3753		2.33333	2	0	0.156667	34.5954		2.33333	2	5	0.156667	37.1752		2.33333	1	0	0.156667	35.219
2.35	1	0	0.157778	36.3852		2.35	2	0	0.157778	34.586		2.35	2	0	0.157778	37.1885		2.35	1	0	0.157778	35.2287
2.36667	1	0	0.158889	36.3869		2.36667	2	0	0.158889	34.5791		2.36667	2	0	0.158889	37.2122		2.36667	2	0	0.158889	35.2473
2.38333	1	0	0.16	36.3864		2.38333	2	1	0.16	34.5769		2.38333	2	0	0.16	37.2352		2.38333	1	0	0.16	35.2717
2.4	1	0	0.161111	36.3882		2.4	2	1	0.161111	34.5768		2.4	2	3	0.161111	37.2634		2.4	1	0	0.161111	35.294
2.41667	1	0	0.162222	36.3965		2.41667	2	3	0.162222	34.5782		2.41667	2	3	0.162222	37.2859		2.41667	1	0	0.162222	35.3297
2.43333	1	0	0.163333	36.3927		2.43333	2	0	0.163333	34.5794		2.43333	2	0	0.163333	37.2958		2.43333	1	0	0.163333	35.3698
2.45	1	0	0.164444	36.3915		2.45	2	0	0.164444	34.5717		2.45	2	0	0.164444	37.3044		2.45	1	0	0.164444	35.424
2.46667	1	0	0.165556	36.3856		2.46667	1	0	0.165556	34.5591		2.46667	2	0	0.165556	37.2966		2.46667	1	0	0.165556	35.467
2.48333	1	0	0.166667	36.3713		2.48333	1	0	0.166667	34.5504		2.48333	2	0	0.166667	37.2908		2.48333	1	0	0.166667	35.502
2.5	1	0	0.167778	36.369		2.5	1	0	0.167778	34.5478		2.5	2	2	0.167778	37.2917		2.5	0	0	0.167778	35.547
2.51667	1	0	0.168889	36.36		2.51667	1	0	0.168889	34.5346		2.51667	2	2	0.168889	37.293		2.51667	2	0	0.168889	35.584
2.53333	1	0	0.17	36.3419		2.53333	1	0	0.17	34.5256		2.53333	2	0	0.17	37.3005		2.53333	1	0	0.17	35.5689
2.55	1	0	0.171111	36.3295		2.55	1	0	0.171111	34.5251		2.55	2	1	0.171111	37.3116		2.55	1	0	0.171111	35.5476
2.56667	0	0	0.172222	36.3251		2.56667	1	0	0.172222	34.5319		2.56667	2	1	0.172222	37.3155		2.56667	1	0	0.172222	35.5188
2.58333	1	0	0.173333	36.3207		2.58333	1	0	0.173333	34.5438		2.58333	2	0	0.173333	37.316		2.58333	1	0	0.173333	35.4785
2.6	1	0	0.174444	36.3219		2.6	1	0	0.174444	34.5423		2.6	2	1	0.174444	37.3223		2.6	1	0	0.174444	35.437
2.61667	1	0	0.175556	36.3289		2.61667	1	0	0.175556	34.5438		2.61667	2	0	0.175556	37.3308		2.61667	1	0	0.175556	35.4001
2.63333	1	0	0.176667	36.3349		2.63333	0	0	0.176667	34.5429		2.63333	2	2	0.176667	37.3221		2.63333	1	0	0.176667	35.3737
2.65	1	0	0.177778	36.3508		2.65	1	0	0.177778	34.5479		2.65	2	0	0.177778	37.3043		2.65	1	0	0.177778	35.3573
2.66667	1	0	0.178889	36.352		2.66667	1	0	0.178889	34.5422		2.66667	2	0	0.178889	37.2847		2.66667	1	0	0.178889	35.3488
2.68333	1	0	0.18	36.3426		2.68333	1	0	0.18	34.5373		2.68333	2	0	0.18	37.2739		2.68333	1	0	0.18	35.3415
2.7	1	0	0.181111	36.3403		2.7	1	0	0.181111	34.5402		2.7	2	1	0.181111	37.2586		2.7	1	0	0.181111	35.3413
2.71667	1	0	0.182222	36.3279		2.71667	1	0	0.182222	34.5422		2.71667	2	0	0.182222	37.2519		2.71667	0	0	0.182222	35.3536
2.73333	0	0	0.183333	36.3058		2.73333	1	0	0.183333	34.5435		2.73333	2	0	0.183333	37.2389		2.73333	1	0	0.183333	35.3705
2.75	0	0	0.184444	36.2879		2.75	1	0	0.184444	34.5382		2.75	2	1	0.184444	37.2198		2.75	1	0	0.184444	35.3777
2.76667	0	0	0.185556	36.2841		2.76667	1	0	0.185556	34.5313		2.76667	2	0	0.185556	37.1999		2.76667	1	0	0.185556	35.3711
2.78333	1	0	0.186667	36.2791		2.78333	1	0	0.186667	34.5288		2.78333	2	1	0.186667	37.1934		2.78333	1	0	0.186667	35.3606
2.8	1	0	0.187778	36.2731		2.8	1	0	0.187778	34.5274		2.8	2	0	0.187778	37.1954		2.8	1	0	0.187778	35.3508
2.81667	1	0	0.188889	36.2803		2.81667	1	0	0.188889	34.5225		2.81667	2	0	0.188889	37.2016		2.81667	1	0	0.188889	35.3468
2.83333	1	0	0.19	36.2925		2.83333	1	0	0.19	34.5145		2.83333	2	0	0.19	37.2188		2.83333	1	0	0.19	35.3486
2.85	2	0	0.191111	36.3071		2.85	0	0	0.191111	34.5066		2.85	2	0	0.191111	37.2358		2.85	1	0	0.191111	35.3451
2.86667	1	0	0.192222	36.3161		2.86667	1	0	0.192222	34.5033		2.86667	2	0	0.192222	37.2309		2.86667	1	0	0.192222	35.3469
2.88333	1	0	0.193333	36.3313		2.88333	0	0	0.193333	34.5		2.88333	2	2	0.193333	37.2177		2.88333	1	0	0.193333	35.3433
2.9	1	0	0.194444	36.3517		2.9	1	0	0.194444	34.4989		2.9	2	0	0.194444	37.2092		2.9	1	0	0.194444	35.3433
2.91667	1	0	0.195556	36.3563		2.91667	1	0	0.195556	34.5015		2.91667	2	0	0.195556	37.2145		2.91667	1	0	0.195556	35.336
2.93333	1	0	0.196667	36.3533		2.93333	1	0	0.196667	34.4949		2.93333	2	0	0.196667	37.2053		2.93333	1	0	0.196667	35.3282
2.95	1	0	0.197778	36.3462		2.95	1	0	0.197778	34.4849		2.95	2	0	0.197778	37.1875		2.95	1	0	0.197778	35.3253
2.96667	1	0	0.198889	36.3466		2.96667	1	0	0.198889	34.4709		2.96667	2	3	0.198889	37.1799		2.96667	1	0	0.198889	35.3225
2.98333	1	0	0.2	36.3456		2.98333	1	0	0.2	34.4617		2.98333	2	8	0.2	37.1767		2.98333	2	0	0.2	35.3156
3	1	0	0.201111	36.3492		3	2	0	0.201111	34.4549		3	2	18	0.201111	37.1817		3	1	0	0.201111	35.3077
3.01667	0	0	0.202222	36.3548		3.01667	1	0	0.202222	34.4549		3.01667	2	8	0.202222	37.2089		3.01667	1	0	0.202222	35.3027
3.03333	0	0	0.203333	36.3426		3.03333	1	0	0.203333	34.4585		3.03333	2	13	0.203333	37.2217		3.03333	2	0	0.203333	35.2995
3.05	1	0	0.204444	36.3278		3.05	1	0	0.204444	34.4595		3.05	2	10	0.204444	37.2311		3.05	2	0	0.204444	35.2953
3.06667	1	0	0.205556	36.3285		3.06667	1	0	0.205556	34.4597		3.06667	2	3	0.205556	37.2478		3.06667	2	1	0.205556	35.2932
3.08333	1	0	0.206667	36.3226		3.08333	1	0	0.206667	34.4571		3.08333	2	11	0.206667	37.2569		3.08333	2	0	0.206667	35.2898
3.1	1	0	0.207778	36.3177		3.1	0	0	0.207778	34.4443		3.1	2	4	0.207778	37.2654		3.1	2	0	0.207778	35.2891
3.11667	1	0	0.208889	36.3141		3.11667	1	0	0.208889	34.4251		3.11667	2	2	0.208889	37.2646		3.11667	2	0	0.208889	35.2935
3.13333	1	0	0.21	36.312		3.13333	1	0	0.21	34.4104		3.13333	2	7	0.21	37.2662		3.13333	2	0	0.21	35.2963
3.15	1	0	0.211111	36.3177		3.15	1	0	0.211111	34.4055		3.15	2	6	0.211111	37.2705		3.15	2	0	0.211111	35.2969
3.16667	1	0	0.212222	36.3273		3.16667	1	0	0.212222	34.4045		3.16667	2	2	0.212222	37.2815		3.16667	2	0	0.212222	35.2936
3.18333	1	0	0.213333	36.3397		3.18333	1	0	0.213333	34.4057		3.18333	2	2	0.213333	37.3056		3.18333	2	2	0.213333	35.2905
3.2	1	0	0.214444	36.3463		3.2	1	0	0.214444	34.4094		3.2	2	1	0.214444	37.3239		3.2	2	0	0.214444	35.2914
3.21667	1	0	0.215556	36.3576		3.21667	0	0	0.215556	34.4144		3.21667	2	2	0.215556	37.3304		3.21667	2	2	0.215556	35.2938
3.23333	1	0	0.216667	36.3708		3.23333	0	0	0.216667	34.4172		3.23333	2	2	0.216667	37.3328		3.23333	2	3	0.216667	35.2969
3.25	1	0	0.217778	36.3788		3.25	0	0	0.217778	34.4147		3.25	2	1	0.217778	37.3268		3.25	2	1	0.217778	35.2993
3.26667	1	0	0.218889	36.3876		3.26667	2	0	0.218889	34.4141		3.26667	2	1	0.218889	37.324		3.26667	2	0	0.218889	35.2837
3.28333	1	0	0.22	36.3937		3.28333	2	0	0.22	34.4013		3.28333	2	0	0.22	37.3318		3.28333	2	0	0.22	35.2651
3.3	0	0	0.221111	36.406		3.3	2	0	0.221111	34.3965		3.3	2	1	0.221111	37.3407		3.3	2	0	0.221111	35.2523
3.31667	1	0	0.222222	36.4093		3.31667	2	0	0.222222	34.3968		3.31667	2	7	0.222222	37.3418		3.31667	2	0	0.222222	35.2476
3.33333	1	0	0.223333	36.4076		3.33333	2	2	0.223333	34.3993		3.33333	2	0	0.223333	37.3419		3.33333	2	0	0.223333	35.2406
3.35	1	0	0.224444	36.4038		3.35	2	0	0.224444	34.399		3.35	2	0	0.224444	37.3442		3.35	2	0	0.224444	35.2412
3.36667	1	0	0.225556	36.3956		3.36667	2	0	0.225556	34.401		3.36667	2	0	0.225556	37.3374		3.36667	2	0	0.225556	35.25
3.38333	2	0	0.226667	36.3941		3.38333	2	0	0.226667	34.4057		3.38333	2	2	0.226667	37.3376		3.38333	2	0	0.226667	35.2599
3.4	2	0	0.227778	36.3949		3.4	2	0	0.227778	34.4113		3.4	2	0	0.227778	37.3392		3.4	2	0	0.227778	35.2759
3.41667	2	0	0.228889	36.3911		3.41667	2	0	0.228889	34.4196		3.41667	2	0	0.228889	37.3519		3.41667	2	0	0.228889	35.2828
3.43333	2	0	0.23	36.376		3.43333	2	2	0.23	34.4226		3.43333	2	2	0.23	37.3612		3.43333	2	0	0.23	35.278
3.45	2	0	0.231111	36.3572		3.45	2	1	0.231111	34.4259		3.45	2	1	0.231111	37.3549		3.45	2	2	0.231111	35.2757
3.46667	2	0	0.232222	36.3428		3.46667	2	0	0.232222	34.4305		3.46667	2	0	0.232222	37.3509		3.46667	2	0	0.232222	35.272
3.48333	2	0	0.233333	36.334		3.48333	2	1	0.233333	34.4318		3.48333	2	0	0.233333	37.3504		3.48333	2	0	0.233333	35.2742
3.5	2	0	0.234444	36.3258		3.5	2	2	0.234444	34.4317		3.5	2	1	0.234444	37.3496		3.5	2	2	0.234444	35.277
3.51667	2	0	0.235556	36.3256		3.51667	2	0	0.235556	34.4319		3.51667	2	1	0.235556	37.354		3.51667	2	0	0.235556	35.2715
3.53333	2	0	0.236667	36.3275		3.53333	1	0	0.236667	34.4353		3.53333	2	1	0.236667	37.3629		3.53333	2	6	0.236667	35.2633
3.55	2	0	0.237778	36.3312		3.55	1	0	0.237778	34.4394		3.55	2	1	0.237778	37.368		3.55	2	0	0.237778	35.2535
3.56667	2	0	0.238889	36.3335		3.56667	1	0	0.238889	34.441		3.56667	2	1	0.238889	37.3702		3.56667	2	2	0.238889	35.2431
3.58333	2	0	0.24	36.3371		3.58333	1	0	0.24	34.4324		3.58333	2	1	0.24	37.3781		3.58333	2	0	0.24	35.2229
3.6	2	5	0.241111	36.3423		3.6	1	0	0.241111	34.4246		3.6	2	0	0.241111	37.3713		3.6	2	0	0.241111	35.2029
3.61667	2	2	0.242222	36.3426		3.61667	1	0	0.242222	34.4204		3.61667	2	1	0.242222	37.3619		3.61667	2	0	0.242222	35.1875
3.63333	2	0	0.243333	36.3472		3.63333	1	0	0.243333	34.4224		3.63333	2	2	0.243333	37.3654		3.63333	2	0	0.243333	35.1787
3.65	2	0	0.244444	36.3532		3.65	1	0	0.244444	34.4265		3.65	2	1	0.244444	37.3642		3.65	2	0	0.244444	35.1744
3.66667	2	1	0.245556	36.3531		3.66667	1	0	0.245556	34.43		3.66667	2	4	0.245556	37.3783		3.66667	2	0	0.245556	35.1773
3.68333	2	0	0.246667	36.3487		3.68333	1	0	0.246667	34.4346		3.68333	2	0	0.246667	37.3816		3.68333	2	0	0.246667	35.1877
3.7	2	0	0.247778	36.3536		3.7	1	0	0.247778	34.4398		3.7	2	1	0.247778	37.3837		3.7	2	0	0.247778	35.1916
3.71667	2	0	0.248889	36.3532		3.71667	1	0	0.248889	34.4436		3.71667	1	2	0.248889	37.3931		3.71667	2	0	0.248889	35.195
3.73333	2	0	0.25	36.3494		3.73333	1	0	0.25	34.4533		3.73333	2	2	0.25	37.4038		3.73333	2	0	0.25	35.1963
3.75	2	1	0.251111	36.3539		3.75	1	0	0.251111	34.4591		3.75	2	2	0.251111	37.4029		3.75	2	1	0.251111	35.2052
3.76667	2	0	0.252222	36.3578		3.76667	1	0	0.252222	34.46		3.76667	2	1	0.252222	37.4048		3.76667	2	0	0.252222	35.2164
3.78333	2	0	0.253333	36.3539		3.78333	1	0	0.253333	34.4531		3.78333	2	0	0.253333	37.4084		3.78333	1	0	0.253333	35.221
3.8	2	0	0.254444	36.3502		3.8	1	0	0.254444	34.449		3.8	2	0	0.254444	37.422		3.8	1	0	0.254444	35.2244
3.81667	2	0	0.255556	36.3478		3.81667	1	0	0.255556	34.4553		3.81667	2	0	0.255556	37.4272		3.81667	1	0	0.255556	35.2229
3.83333	2	0	0.256667	36.3631		3.83333	1	0	0.256667	34.4622		3.83333	2	0	0.256667	37.4177		3.83333	1	0	0.256667	35.2178
3.85	2	0	0.257778	36.3777		3.85	1	0	0.257778	34.4673		3.85	2	1	0.257778	37.4187		3.85	1	0	0.257778	35.23
3.86667	2	0	0.258889	36.3888		3.86667	1	0	0.258889	34.476		3.86667	2	0	0.258889	37.4085		3.86667	1	0	0.258889	35.2484
3.88333	2	0	0.26	36.4027		3.88333	1	0	0.26	34.4836		3.88333	2	0	0.26	37.4053		3.88333	1	0	0.26	35.2591
3.9	1	1	0.261111	36.4186		3.9	1	0	0.261111	34.4946		3.9	2	2	0.261111	37.405		3.9	1	0	0.261111	35.2792
3.91667	1	0	0.262222	36.4305		3.91667	1	0	0.262222	34.5038		3.91667	2	2	0.262222	37.4009		3.91667	1	0	0.262222	35.3071
3.93333	1	0	0.263333	36.4464		3.93333	0	0	0.263333	34.5155		3.93333	2	2	0.263333	37.4098		3.93333	1	0	0.263333	35.3182
3.95	1	0	0.264444	36.4564		3.95	1	2	0.264444	34.5275		3.95	2	0	0.264444	37.4296		3.95	0	0	0.264444	35.33
3.96667	1	0	0.265556	36.4631		3.96667	1	0	0.265556	34.5233		3.96667	2	1	0.265556	37.4382		3.96667	1	0	0.265556	35.3363
3.98333	1	0	0.266667	36.4631		3.98333	1	0	0.266667	34.515		3.98333	2	2	0.266667	37.4526		3.98333	1	0	0.266667	35.3448
4	1	0	0.267778	36.4573		4	1	0	0.267778	34.5087		4	2	5	0.267778	37.4699		4	1	0	0.267778	35.3527
4.01667	0	0	0.268889	36.4465		4.01667	1	0	0.268889	34.5042		4.01667	2	2	0.268889	37.4698		4.01667	1	0	0.268889	35.363
4.03333	2	0	0.27	36.422		4.03333	1	0	0.27	34.5066		4.03333	2	4	0.27	37.4744		4.03333	1	0	0.27	35.367
4.05	2	0	0.271111	36.3691		4.05	1	0	0.271111	34.5091		4.05	2	5	0.271111	37.4791		4.05	1	0	0.271111	35.3628
4.06667	2	0	0.272222	36.3108		4.06667	1	0	0.272222	34.5123		4.06667	2	2	0.272222	37.4701		4.06667	1	0	0.272222	35.3616
4.08333	2	0	0.273333	36.2649		4.08333	1	0	0.273333	34.5218		4.08333	2	4	0.273333	37.4623		4.08333	1	0	0.273333	35.3479
4.1	2	0	0.274444	36.2233		4.1	1	0	0.274444	34.5253		4.1	2	2	0.274444	37.4661		4.1	1	0	0.274444	35.3339
4.11667	2	0	0.275556	36.2083		4.11667	1	0	0.275556	34.5261		4.11667	2	0	0.275556	37.464		4.11667	1	0	0.275556	35.331
4.13333	2	0	0.276667	36.2205		4.13333	1	0	0.276667	34.5273		4.13333	2	0	0.276667	37.4536		4.13333	1	0	0.276667	35.323
4.15	2	0	0.277778	36.2405		4.15	1	0	0.277778	34.5295		4.15	2	0	0.277778	37.4531		4.15	1	0	0.277778	35.3264
4.16667	2	0	0.278889	36.2598		4.16667	0	0	0.278889	34.5367		4.16667	2	0	0.278889	37.4535		4.16667	2	0	0.278889	35.3271
4.18333	2	0	0.28	36.2685		4.18333	0	0	0.28	34.5368		4.18333	2	0	0.28	37.4474		4.18333	2	0	0.28	35.3243
4.2	2	0	0.281111	36.261		4.2	1	0	0.281111	34.5424		4.2	2	1	0.281111	37.4467		4.2	2	0	0.281111	35.3146
4.21667	2	0	0.282222	36.2563		4.21667	2	0	0.282222	34.5453		4.21667	2	1	0.282222	37.4626		4.21667	2	0	0.282222	35.3105
4.23333	2	0	0.283333	36.2587		4.23333	2	0	0.283333	34.5497		4.23333	2	0	0.283333	37.474		4.23333	2	0	0.283333	35.3048
4.25	2	0	0.284444	36.2504		4.25	2	0	0.284444	34.5545		4.25	2	0	0.284444	37.4824		4.25	2	0	0.284444	35.2967
4.26667	2	0	0.285556	36.2182		4.26667	2	0	0.285556	34.5703		4.26667	2	2	0.285556	37.4898		4.26667	2	2	0.285556	35.2924
4.28333	1	0	0.286667	36.2103		4.28333	2	0	0.286667	34.6039		4.28333	2	0	0.286667	37.5061		4.28333	2	0	0.286667	35.2915
4.3	1	0	0.287778	36.2197		4.3	2	0	0.287778	34.6322		4.3	1	0	0.287778	37.5253		4.3	2	0	0.287778	35.294
4.31667	1	0	0.288889	36.224		4.31667	2	1	0.288889	34.6567		4.31667	2	1	0.288889	37.5412		4.31667	2	0	0.288889	35.2911
4.33333	1	0	0.29	36.2159		4.33333	2	0	0.29	34.6841		4.33333	2	0	0.29	37.5453		4.33333	2	0	0.29	35.3023
4.35	1	0	0.291111	36.2107		4.35	2	0	0.291111	34.706		4.35	2	1	0.291111	37.5413		4.35	1	0	0.291111	35.3181
4.36667	1	0	0.292222	36.1924		4.36667	2	0	0.292222	34.7174		4.36667	2	0	0.292222	37.547		4.36667	1	0	0.292222	35.338
4.38333	1	0	0.293333	36.1764		4.38333	2	1	0.293333	34.7465		4.38333	2	1	0.293333	37.5507		4.38333	1	0	0.293333	35.3422
4.4	1	0	0.294444	36.1695		4.4	2	0	0.294444	34.7985		4.4	2	0	0.294444	37.571		4.4	1	0	0.294444	35.3336
4.41667	1	0	0.295556	36.1536		4.41667	2	0	0.295556	34.8462		4.41667	2	0	0.295556	37.5768		4.41667	1	0	0.295556	35.3198
4.43333	1	0	0.296667	36.1591		4.43333	2	1	0.296667	34.9059		4.43333	2	0	0.296667	37.571		4.43333	0	0	0.296667	35.3054
4.45	1	0	0.297778	36.178		4.45	2	1	0.297778	34.9712		4.45	2	0	0.297778	37.57		4.45	1	0	0.297778	35.2953
4.46667	0	0	0.298889	36.1981		4.46667	2	2	0.298889	34.976		4.46667	2	1	0.298889	37.563		4.46667	2	0	0.298889	35.2873
4.48333	0	0	0.3	36.2071		4.48333	2	1	0.3	34.9482		4.48333	2	1	0.3	37.5628		4.48333	2	0	0.3	35.2831
4.5	1	0	0.301111	36.2187		4.5	2	1	0.301111	34.9095		4.5	2	1	0.301111	37.5605		4.5	2	0	0.301111	35.2689
4.51667	1	0	0.302222	36.2288		4.51667	2	1	0.302222	34.8721		4.51667	1	1	0.302222	37.5542		4.51667	2	0	0.302222	35.2599
4.53333	1	0	0.303333	36.2404		4.53333	1	0	0.303333	34.8446		4.53333	1	1	0.303333	37.5562		4.53333	2	0	0.303333	35.2596
4.55	1	0	0.304444	36.2553		4.55	2	0	0.304444	34.8179		4.55	2	0	0.304444	37.534		4.55	2	0	0.304444	35.2657
4.56667	1	0	0.305556	36.2507		4.56667	2	0	0.305556	34.791		4.56667	2	0	0.305556	37.5061		4.56667	2	0	0.305556	35.2688
4.58333	1	0	0.306667	36.2466		4.58333	1	0	0.306667	34.7681		4.58333	2	1	0.306667	37.4903		4.58333	2	3	0.306667	35.2685
4.6	1	0	0.307778	36.2482		4.6	1	0	0.307778	34.7543		4.6	1	0	0.307778	37.4736		4.6	2	0	0.307778	35.2652
4.61667	1	0	0.308889	36.2561		4.61667	1	0	0.308889	34.7415		4.61667	2	3	0.308889	37.4648		4.61667	2	0	0.308889	35.2539
4.63333	1	0	0.31	36.2649		4.63333	1	0	0.31	34.7214		4.63333	2	3	0.31	37.4555		4.63333	2	0	0.31	35.2436
4.65	1	0	0.311111	36.269		4.65	1	0	0.311111	34.7039		4.65	2	3	0.311111	37.4534		4.65	1	0	0.311111	35.2377
4.66667	1	0	0.312222	36.2782		4.66667	1	0	0.312222	34.684		4.66667	2	2	0.312222	37.4427		4.66667	1	0	0.312222	35.2264
4.68333	1	0	0.313333	36.2684		4.68333	1	0	0.313333	34.669		4.68333	2	3	0.313333	37.4476		4.68333	1	0	0.313333	35.2202
4.7	1	0	0.314444	36.2455		4.7	1	0	0.314444	34.6596		4.7	2	0	0.314444	37.4587		4.7	1	0	0.314444	35.2225
4.71667	1	0	0.315556	36.215		4.71667	1	0	0.315556	34.6527		4.71667	2	2	0.315556	37.4705		4.71667	1	0	0.315556	35.2264
4.73333	1	0	0.316667	36.1823		4.73333	1	0	0.316667	34.6439		4.73333	2	3	0.316667	37.4651		4.73333	1	0	0.316667	35.2294
4.75	1	0	0.317778	36.1554		4.75	1	0	0.317778	34.64		4.75	2	0	0.317778	37.4554		4.75	1	0	0.317778	35.2359
4.76667	1	0	0.318889	36.1301		4.76667	1	0	0.318889	34.6298		4.76667	2	5	0.318889	37.4485		4.76667	1	0	0.318889	35.2471
4.78333	0	0	0.32	36.1071		4.78333	1	0	0.32	34.6258		4.78333	2	0	0.32	37.4576		4.78333	1	0	0.32	35.2514
4.8	0	0	0.321111	36.0879		4.8	1	0	0.321111	34.6127		4.8	2	1	0.321111	37.4551		4.8	1	0	0.321111	35.2629
4.81667	0	0	0.322222	36.0627		4.81667	1	0	0.322222	34.5968		4.81667	2	2	0.322222	37.4436		4.81667	1	0	0.322222	35.262
4.83333	0	0	0.323333	36.0426		4.83333	1	0	0.323333	34.584		4.83333	2	6	0.323333	37.4343		4.83333	1	0	0.323333	35.2457
4.85	1	0	0.324444	36.0245		4.85	1	0	0.324444	34.5795		4.85	2	6	0.324444	37.4322		4.85	0	0	0.324444	35.2336
4.86667	1	0	0.325556	36.0054		4.86667	1	0	0.325556	34.5793		4.86667	2	2	0.325556	37.441		4.86667	1	0	0.325556	35.2264
4.88333	1	0	0.326667	35.9887		4.88333	1	0	0.326667	34.587		4.88333	2	2	0.326667	37.4445		4.88333	1	0	0.326667	35.2213
4.9	1	0	0.327778	35.976		4.9	1	0	0.327778	34.5921		4.9	2	3	0.327778	37.4452		4.9	1	0	0.327778	35.2146
4.91667	1	0	0.328889	35.9663		4.91667	1	0	0.328889	34.5921		4.91667	2	0	0.328889	37.4482		4.91667	1	0	0.328889	35.207
4.93333	1	0	0.33	35.9494		4.93333	1	0	0.33	34.5913		4.93333	2	3	0.33	37.4536		4.93333	1	0	0.33	35.1957
4.95	1	0	0.331111	35.9446		4.95	1	0	0.331111	34.5861		4.95	2	0	0.331111	37.4439		4.95	1	0	0.331111	35.187
4.96667	1	0	0.332222	35.9549		4.96667	1	0	0.332222	34.5695		4.96667	2	0	0.332222	37.4455		4.96667	1	0	0.332222	35.1767
4.98333	1	0	0.333333	35.9757		4.98333	1	0	0.333333	34.5626		4.98333	2	3	0.333333	37.444		4.98333	1	0	0.333333	35.178
5	1	0	0.334444	35.9876		5	0	0	0.334444	34.5638		5	2	0	0.334444	37.4421		5	1	0	0.334444	35.1738
5.01667	1	0	0.335556	35.9856		5.01667	1	2	0.335556	34.5664		5.01667	2	0	0.335556	37.4458		5.01667	1	0	0.335556	35.1571
5.03333	1	0	0.336667	35.9873		5.03333	1	0	0.336667	34.5694		5.03333	2	8	0.336667	37.4472		5.03333	1	0	0.336667	35.1409
5.05	1	0	0.337778	35.9854		5.05	1	0	0.337778	34.5704		5.05	2	9	0.337778	37.4415		5.05	1	0	0.337778	35.1388
5.06667	1	0	0.338889	35.9792		5.06667	1	0	0.338889	34.5715		5.06667	2	2	0.338889	37.4334		5.06667	1	0	0.338889	35.1368
5.08333	1	0	0.34	35.9713		5.08333	1	0	0.34	34.5721		5.08333	2	1	0.34	37.4273		5.08333	1	0	0.34	35.1341
5.1	2	0	0.341111	35.9659		5.1	1	0	0.341111	34.5726		5.1	2	5	0.341111	37.4271		5.1	0	0	0.341111	35.1364
5.11667	2	0	0.342222	35.9626		5.11667	1	0	0.342222	34.5714		5.11667	2	0	0.342222	37.4247		5.11667	1	0	0.342222	35.1397
5.13333	1	0	0.343333	35.9601		5.13333	1	0	0.343333	34.5729		5.13333	2	1	0.343333	37.4236		5.13333	1	0	0.343333	35.1423
5.15	1	0	0.344444	35.9559		5.15	1	0	0.344444	34.5748		5.15	2	0	0.344444	37.425		5.15	1	0	0.344444	35.1421
5.16667	1	0	0.345556	35.9488		5.16667	1	0	0.345556	34.5704		5.16667	2	0	0.345556	37.4284		5.16667	1	0	0.345556	35.1338
5.18333	1	0	0.346667	35.9438		5.18333	1	0	0.346667	34.558		5.18333	2	0	0.346667	37.4449		5.18333	1	0	0.346667	35.1199
5.2	1	0	0.347778	35.9355		5.2	1	0	0.347778	34.5475		5.2	2	0	0.347778	37.4425		5.2	0	0	0.347778	35.1096
5.21667	1	0	0.348889	35.9291		5.21667	1	0	0.348889	34.5353		5.21667	2	0	0.348889	37.4435		5.21667	1	0	0.348889	35.0924
5.23333	0	0	0.35	35.9218		5.23333	0	0	0.35	34.5195		5.23333	2	0	0.35	37.4358		5.23333	1	0	0.35	35.0809
5.25	0	0	0.351111	35.9153		5.25	1	0	0.351111	34.5119		5.25	2	0	0.351111	37.4436		5.25	1	0	0.351111	35.0701
5.26667	1	0	0.352222	35.9103		5.26667	1	0	0.352222	34.5097		5.26667	2	0	0.352222	37.4419		5.26667	1	0	0.352222	35.0657
5.28333	1	0	0.353333	35.9033		5.28333	1	0	0.353333	34.5067		5.28333	2	2	0.353333	37.441		5.28333	1	0	0.353333	35.0642
5.3	1	0	0.354444	35.8955		5.3	1	0	0.354444	34.5037		5.3	2	0	0.354444	37.4488		5.3	1	0	0.354444	35.0641
5.31667	1	0	0.355556	35.8879		5.31667	1	0	0.355556	34.506		5.31667	2	0	0.355556	37.4393		5.31667	1	0	0.355556	35.0645
5.33333	1	0	0.356667	35.8822		5.33333	1	0	0.356667	34.5125		5.33333	2	0	0.356667	37.4249		5.33333	0	0	0.356667	35.0665
5.35	1	0	0.357778	35.8774		5.35	1	0	0.357778	34.5123		5.35	2	0	0.357778	37.4282		5.35	1	0	0.357778	35.0641
5.36667	1	0	0.358889	35.8677		5.36667	1	0	0.358889	34.5121		5.36667	2	0	0.358889	37.4283		5.36667	1	0	0.358889	35.0626
5.38333	1	0	0.36	35.8563		5.38333	1	0	0.36	34.5154		5.38333	2	0	0.36	37.44		5.38333	1	0	0.36	35.058
5.4	2	0	0.361111	35.849		5.4	1	0	0.361111	34.5237		5.4	2	0	0.361111	37.4472		5.4	1	0	0.361111	35.0581
5.41667	2	0	0.362222	35.8441		5.41667	1	0	0.362222	34.5329		5.41667	2	2	0.362222	37.4469		5.41667	1	0	0.362222	35.0483
5.43333	2	0	0.363333	35.8528		5.43333	1	0	0.363333	34.56		5.43333	2	1	0.363333	37.4542		5.43333	1	0	0.363333	35.0269
5.45	2	0	0.364444	35.8624		5.45	1	0	0.364444	34.6009		5.45	2	0	0.364444	37.4541		5.45	0	0	0.364444	35.0156
5.46667	2	0	0.365556	35.8702		5.46667	1	0	0.365556	34.642		5.46667	2	4	0.365556	37.4637		5.46667	0	0	0.365556	34.9988
5.48333	2	0	0.366667	35.8809		5.48333	1	0	0.366667	34.6939		5.48333	2	1	0.366667	37.4646		5.48333	1	0	0.366667	34.9896
5.5	2	0	0.367778	35.9006		5.5	1	0	0.367778	34.7405		5.5	2	3	0.367778	37.4705		5.5	2	0	0.367778	34.9834
5.51667	2	0	0.368889	35.9329		5.51667	1	0	0.368889	34.7823		5.51667	2	0	0.368889	37.4577		5.51667	2	0	0.368889	34.9868
5.53333	2	0	0.37	35.9516		5.53333	1	0	0.37	34.8171		5.53333	2	1	0.37	37.4355		5.53333	1	0	0.37	34.9903
5.55	1	0	0.371111	35.9596		5.55	0	0	0.371111	34.8433		5.55	2	0	0.371111	37.4257		5.55	1	0	0.371111	34.9943
5.56667	2	0	0.372222	35.9545		5.56667	1	0	0.372222	34.8545		5.56667	2	2	0.372222	37.4242		5.56667	1	0	0.372222	35.0025
5.58333	2	0	0.373333	35.9451		5.58333	1	0	0.373333	34.871		5.58333	2	1	0.373333	37.4263		5.58333	1	0	0.373333	35.0093
5.6	2	0	0.374444	35.9424		5.6	1	0	0.374444	34.8902		5.6	2	0	0.374444	37.4264		5.6	1	0	0.374444	35.0185
5.61667	1	0	0.375556	35.9413		5.61667	1	0	0.375556	34.8975		5.61667	2	0	0.375556	37.4371		5.61667	1	0	0.375556	35.0247
5.63333	1	0	0.376667	35.9348		5.63333	0	0	0.376667	34.9045		5.63333	2	0	0.376667	37.4635		5.63333	1	0	0.376667	35.0315
5.65	1	0	0.377778	35.9319		5.65	2	0	0.377778	34.922		5.65	2	1	0.377778	37.4715		5.65	1	0	0.377778	35.0456
5.66667	1	0	0.378889	35.9348		5.66667	2	0	0.378889	34.9457		5.66667	2	1	0.378889	37.4687		5.66667	1	0	0.378889	35.0739
5.68333	1	0	0.38	35.9445		5.68333	2	0	0.38	34.9653		5.68333	2	4	0.38	37.4713		5.68333	1	0	0.38	35.1131
5.7	1	0	0.381111	35.9339		5.7	2	0	0.381111	34.9776		5.7	2	2	0.381111	37.4721		5.7	1	0	0.381111	35.165
5.71667	1	0	0.382222	35.9373		5.71667	2	0	0.382222	34.95		5.71667	2	1	0.382222	37.4747		5.71667	1	0	0.382222	35.2267
5.73333	1	0	0.383333	35.9394		5.73333	2	1	0.383333	34.9119		5.73333	2	10	0.383333	37.4875		5.73333	1	0	0.383333	35.2864
5.75	1	0	0.384444	35.9229		5.75	2	1	0.384444	34.8689		5.75	2	2	0.384444	37.4949		5.75	1	0	0.384444	35.3407
5.76667	1	0	0.385556	35.9053		5.76667	2	3	0.385556	34.8269		5.76667	2	2	0.385556	37.4992		5.76667	1	0	0.385556	35.3885
5.78333	1	0	0.386667	35.8904		5.78333	2	0	0.386667	34.787		5.78333	2	4	0.386667	37.4874		5.78333	1	0	0.386667	35.4288
5.8	1	0	0.387778	35.8819		5.8	2	1	0.387778	34.7531		5.8	2	4	0.387778	37.4836		5.8	1	0	0.387778	35.4581
5.81667	0	0	0.388889	35.8679		5.81667	2	0	0.388889	34.7294		5.81667	2	1	0.388889	37.4884		5.81667	1	0	0.388889	35.4809
5.83333	1	0	0.39	35.8632		5.83333	2	0	0.39	34.7191		5.83333	2	2	0.39	37.4827		5.83333	1	0	0.39	35.5032
5.85	1	0	0.391111	35.8575		5.85	2	0	0.391111	34.7066		5.85	2	0	0.391111	37.4816		5.85	2	0	0.391111	35.522
5.86667	1	0	0.392222	35.8519		5.86667	2	3	0.392222	34.6977		5.86667	2	4	0.392222	37.4846		5.86667	2	0	0.392222	35.5381
5.88333	0	0	0.393333	35.8476		5.88333	2	0	0.393333	34.6911		5.88333	2	1	0.393333	37.4894		5.88333	2	3	0.393333	35.5525
5.9	1	0	0.394444	35.8459		5.9	2	0	0.394444	34.6829		5.9	2	1	0.394444	37.4911		5.9	2	0	0.394444	35.5633
5.91667	1	0	0.395556	35.8326		5.91667	2	1	0.395556	34.6761		5.91667	2	1	0.395556	37.4963		5.91667	2	0	0.395556	35.5737
5.93333	1	0	0.396667	35.8169		5.93333	2	0	0.396667	34.6788		5.93333	2	0	0.396667	37.4877		5.93333	2	2	0.396667	35.5787
5.95	2	0	0.397778	35.8082		5.95	2	1	0.397778	34.6828		5.95	2	0	0.397778	37.486		5.95	2	0	0.397778	35.5588
5.96667	2	0	0.398889	35.807		5.96667	2	2	0.398889	34.6781		5.96667	2	2	0.398889	37.4948		5.96667	2	0	0.398889	35.5249
5.98333	1	0	0.4	35.8087		5.98333	2	0	0.4	34.6692		5.98333	2	0	0.4	37.4903		5.98333	2	0	0.4	35.4871
6	1	0	0.401111	35.8095		6	2	1	0.401111	34.6657		6	1	0	0.401111	37.4898		6	2	0	0.401111	35.4371
6.01667	1	0	0.402222	35.8071		6.01667	2	1	0.402222	34.656		6.01667	1	0	0.402222	37.4872		6.01667	2	0	0.402222	35.3878
6.03333	1	0	0.403333	35.7969		6.03333	2	3	0.403333	34.647		6.03333	1	0	0.403333	37.4958		6.03333	2	0	0.403333	35.3459
6.05	1	0	0.404444	35.7887		6.05	1	1	0.404444	34.6326		6.05	1	0	0.404444	37.5034		6.05	2	0	0.404444	35.3148
6.06667	1	0	0.405556	35.7829		6.06667	1	0	0.405556	34.6201		6.06667	1	0	0.405556	37.4954		6.06667	2	0	0.405556	35.2771
6.08333	1	0	0.406667	35.7772		6.08333	1	0	0.406667	34.6187		6.08333	1	0	0.406667	37.4927		6.08333	2	0	0.406667	35.2476
6.1	1	0	0.407778	35.7615		6.1	1	0	0.407778	34.622		6.1	1	0	0.407778	37.5027		6.1	1	0	0.407778	35.2299
6.11667	1	0	0.408889	35.7439		6.11667	1	0	0.408889	34.625		6.11667	1	0	0.408889	37.5168		6.11667	1	0	0.408889	35.215
6.13333	1	0	0.41	35.7344		6.13333	1	0	0.41	34.6163		6.13333	0	0	0.41	37.5249		6.13333	1	0	0.41	35.2034
6.15	1	0	0.411111	35.7299		6.15	1	0	0.411111	34.6005		6.15	1	0	0.411111	37.5202		6.15	1	0	0.411111	35.1909
6.16667	1	0	0.412222	35.7237		6.16667	1	1	0.412222	34.605		6.16667	2	0	0.412222	37.5151		6.16667	1	0	0.412222	35.1712
6.18333	1	0	0.413333	35.7125		6.18333	1	1	0.413333	34.6131		6.18333	2	1	0.413333	37.5102		6.18333	1	0	0.413333	35.1481
6.2	1	0	0.414444	35.7001		6.2	1	0	0.414444	34.6164		6.2	2	2	0.414444	37.5099		6.2	1	0	0.414444	35.1296
6.21667	0	0	0.415556	35.6881		6.21667	1	0	0.415556	34.6193		6.21667	2	3	0.415556	37.5106		6.21667	1	0	0.415556	35.1199
6.23333	0	0	0.416667	35.6825		6.23333	1	0	0.416667	34.6149		6.23333	2	0	0.416667	37.4948		6.23333	1	0	0.416667	35.1122
6.25	0	0	0.417778	35.693		6.25	0	0	0.417778	34.6126		6.25	2	0	0.417778	37.4868		6.25	1	0	0.417778	35.0951
6.26667	1	0	0.418889	35.6799		6.26667	1	0	0.418889	34.6082		6.26667	2	0	0.418889	37.4929		6.26667	1	0	0.418889	35.078
6.28333	1	0	0.42	35.6513		6.28333	1	0	0.42	34.6069		6.28333	2	1	0.42	37.5032		6.28333	1	0	0.42	35.0616
6.3	1	0	0.421111	35.6338		6.3	1	0	0.421111	34.6053		6.3	2	2	0.421111	37.511		6.3	1	0	0.421111	35.0496
6.31667	1	0	0.422222	35.6179		6.31667	1	0	0.422222	34.6077		6.31667	2	0	0.422222	37.5082		6.31667	1	0	0.422222	35.042
6.33333	1	0	0.423333	35.6069		6.33333	1	0	0.423333	34.6071		6.33333	2	0	0.423333	37.4816		6.33333	1	0	0.423333	35.0376
6.35	1	0	0.424444	35.5989		6.35	1	0	0.424444	34.5971		6.35	2	0	0.424444	37.4555		6.35	1	0	0.424444	35.0301
6.36667	1	0	0.425556	35.5952		6.36667	1	0	0.425556	34.5846		6.36667	1	0	0.425556	37.439		6.36667	1	0	0.425556	35.0285
6.38333	0	0	0.426667	35.5956		6.38333	1	0	0.426667	34.5807		6.38333	1	0	0.426667	37.4406		6.38333	0	0	0.426667	35.0264
6.4	2	0	0.427778	35.5988		6.4	1	0	0.427778	34.5833		6.4	1	0	0.427778	37.4428		6.4	1	0	0.427778	35.0168
6.41667	2	0	0.428889	35.6009		6.41667	1	0	0.428889	34.5884		6.41667	1	0	0.428889	37.4451		6.41667	1	0	0.428889	34.9924
6.43333	2	0	0.43	35.5994		6.43333	1	0	0.43	34.5859		6.43333	1	0	0.43	37.4498		6.43333	1	0	0.43	34.9713
6.45	2	0	0.431111	35.5913		6.45	1	0	0.431111	34.5733		6.45	1	0	0.431111	37.4562		6.45	1	0	0.431111	34.9696
6.46667	2	0	0.432222	35.5837		6.46667	1	0	0.432222	34.5679		6.46667	1	0	0.432222	37.4585		6.46667	1	0	0.432222	34.9712
6.48333	2	0	0.433333	35.5781		6.48333	1	0	0.433333	34.5623		6.48333	1	0	0.433333	37.4724		6.48333	1	0	0.433333	34.9753
6.5	2	0	0.434444	35.5764		6.5	1	0	0.434444	34.5611		6.5	0	0	0.434444	37.4896		6.5	1	0	0.434444	34.9846
6.51667	2	0	0.435556	35.5763		6.51667	1	0	0.435556	34.5636		6.51667	2	0	0.435556	37.4844		6.51667	1	0	0.435556	34.9873
6.53333	2	0	0.436667	35.5779		6.53333	1	0	0.436667	34.5699		6.53333	1	0	0.436667	37.4763		6.53333	1	0	0.436667	34.9853
6.55	2	0	0.437778	35.5765		6.55	1	0	0.437778	34.5696		6.55	1	0	0.437778	37.4702		6.55	1	0	0.437778	34.9886
6.56667	2	0	0.438889	35.5617		6.56667	0	0	0.438889	34.5671		6.56667	1	0	0.438889	37.4581		6.56667	1	0	0.438889	34.9892
6.58333	2	0	0.44	35.5305		6.58333	1	0	0.44	34.5551		6.58333	1	0	0.44	37.4487		6.58333	0	0	0.44	34.9905
6.6	2	0	0.441111	35.5004		6.6	2	0	0.441111	34.5465		6.6	1	0	0.441111	37.4427		6.6	1	0	0.441111	34.9887
6.61667	2	3	0.442222	35.4883		6.61667	2	0	0.442222	34.5411		6.61667	1	0	0.442222	37.4441		6.61667	1	0	0.442222	34.9851
6.63333	2	0	0.443333	35.4809		6.63333	1	0	0.443333	34.5411		6.63333	1	0	0.443333	37.4532		6.63333	1	0	0.443333	34.9714
6.65	2	0	0.444444	35.4731		6.65	2	2	0.444444	34.5479		6.65	1	0	0.444444	37.4647		6.65	1	0	0.444444	34.9466
6.66667	2	0	0.445556	35.4702		6.66667	1	0	0.445556	34.5458		6.66667	0	0	0.445556	37.475		6.66667	1	0	0.445556	34.9286
6.68333	2	0	0.446667	35.4699		6.68333	1	0	0.446667	34.5388		6.68333	1	0	0.446667	37.4925		6.68333	1	0	0.446667	34.9228
6.7	2	0	0.447778	35.4636		6.7	1	0	0.447778	34.5401		6.7	1	0	0.447778	37.5034		6.7	1	0	0.447778	34.9203
6.71667	2	0	0.448889	35.4614		6.71667	1	0	0.448889	34.5406		6.71667	1	0	0.448889	37.5185		6.71667	1	0	0.448889	34.918
6.73333	2	0	0.45	35.4538		6.73333	1	0	0.45	34.5338		6.73333	1	0	0.45	37.5305		6.73333	0	0	0.45	34.9162
6.75	2	0	0.451111	35.4391		6.75	1	1	0.451111	34.5132		6.75	1	0	0.451111	37.5464		6.75	1	0	0.451111	34.9166
6.76667	2	0	0.452222	35.4255		6.76667	1	0	0.452222	34.493		6.76667	1	0	0.452222	37.5489		6.76667	1	0	0.452222	34.9144
6.78333	2	0	0.453333	35.4144		6.78333	1	0	0.453333	34.4894		6.78333	1	0	0.453333	37.5513		6.78333	1	0	0.453333	34.9074
6.8	2	0	0.454444	35.4095		6.8	1	0	0.454444	34.4916		6.8	1	0	0.454444	37.5702		6.8	1	0	0.454444	34.8912
6.81667	2	0	0.455556	35.4091		6.81667	1	1	0.455556	34.4965		6.81667	0	0	0.455556	37.589		6.81667	1	0	0.455556	34.8875
6.83333	1	0	0.456667	35.4074		6.83333	1	0	0.456667	34.5023		6.83333	1	0	0.456667	37.5973		6.83333	1	0	0.456667	34.8845
6.85	1	0	0.457778	35.406		6.85	1	0	0.457778	34.507		6.85	1	0	0.457778	37.6121		6.85	1	0	0.457778	34.888
6.86667	1	0	0.458889	35.396		6.86667	1	0	0.458889	34.5152		6.86667	1	0	0.458889	37.6101		6.86667	1	1	0.458889	34.8905
6.88333	1	0	0.46	35.3842		6.88333	1	0	0.46	34.5311		6.88333	1	0	0.46	37.6122		6.88333	1	0	0.46	34.895
6.9	1	0	0.461111	35.3699		6.9	1	0	0.461111	34.527		6.9	1	0	0.461111	37.608		6.9	1	0	0.461111	34.9007
6.91667	1	0	0.462222	35.36		6.91667	1	0	0.462222	34.5139		6.91667	1	0	0.462222	37.6008		6.91667	1	0	0.462222	34.9086
6.93333	1	0	0.463333	35.3534		6.93333	1	0	0.463333	34.5058		6.93333	1	0	0.463333	37.5931		6.93333	1	0	0.463333	34.9091
6.95	1	0	0.464444	35.3509		6.95	1	0	0.464444	34.507		6.95	1	0	0.464444	37.5888		6.95	2	0	0.464444	34.8882
6.96667	1	0	0.465556	35.3499		6.96667	0	0	0.465556	34.511		6.96667	1	0	0.465556	37.582		6.96667	2	1	0.465556	34.8736
6.98333	0	0	0.466667	35.3452		6.98333	0	0	0.466667	34.5167		6.98333	1	0	0.466667	37.5688		6.98333	2	0	0.466667	34.8673
7	1	0	0.467778	35.3366		7	1	0	0.467778	34.5243		7	1	0	0.467778	37.5615		7	2	1	0.467778	34.8628
7.01667	1	0	0.468889	35.3184		7.01667	1	0	0.468889	34.5358		7.01667	0	0	0.468889	37.5565		7.01667	2	0	0.468889	34.8585
7.03333	1	0	0.47	35.294		7.03333	1	0	0.47	34.5436		7.03333	0	0	0.47	37.5521		7.03333	2	0	0.47	34.8588
7.05	1	0	0.471111	35.2818		7.05	2	0	0.471111	34.5437		7.05	1	0	0.471111	37.539		7.05	2	3	0.471111	34.8582
7.06667	1	0	0.472222	35.271		7.06667	1	0	0.472222	34.5477		7.06667	0	0	0.472222	37.53		7.06667	2	1	0.472222	34.8616
7.08333	1	0	0.473333	35.2645		7.08333	1	0	0.473333	34.5575		7.08333	1	0	0.473333	37.5264		7.08333	2	0	0.473333	34.8656
7.1	1	0	0.474444	35.2595		7.1	1	0	0.474444	34.563		7.1	1	0	0.474444	37.5202		7.1	1	0	0.474444	34.8652
7.11667	1	0	0.475556	35.2537		7.11667	1	0	0.475556	34.5641		7.11667	1	0	0.475556	37.5134		7.11667	1	0	0.475556	34.8618
7.13333	1	0	0.476667	35.251		7.13333	1	0	0.476667	34.5627		7.13333	1	0	0.476667	37.5131		7.13333	1	0	0.476667	34.8547
7.15	1	0	0.477778	35.2496		7.15	1	0	0.477778	34.5602		7.15	1	0	0.477778	37.521		7.15	1	0	0.477778	34.8508
7.16667	1	0	0.478889	35.2478		7.16667	2	1	0.478889	34.5641		7.16667	1	0	0.478889	37.5282		7.16667	1	0	0.478889	34.852
7.18333	1	0	0.48	35.2488		7.18333	2	0	0.48	34.575		7.18333	1	0	0.48	37.5349		7.18333	1	0	0.48	34.8523
7.2	0	0	0.481111	35.2485		7.2	2	0	0.481111	34.5879		7.2	1	0	0.481111	37.52		7.2	1	0	0.481111	34.8605
7.21667	1	0	0.482222	35.2392		7.21667	2	0	0.482222	34.6053		7.21667	1	0	0.482222	37.5061		7.21667	0	0	0.482222	34.8701
7.23333	1	0	0.483333	35.2211		7.23333	2	0	0.483333	34.6274		7.23333	1	0	0.483333	37.4871		7.23333	1	0	0.483333	34.8776
7.25	1	0	0.484444	35.2066		7.25	2	0	0.484444	34.6568		7.25	1	0	0.484444	37.4776		7.25	1	0	0.484444	34.8901
7.26667	1	0	0.485556	35.1907		7.26667	2	3	0.485556	34.6819		7.26667	1	0	0.485556	37.4797		7.26667	1	0	0.485556	34.9003
7.28333	0	0	0.486667	35.1626		7.28333	2	1	0.486667	34.7104		7.28333	1	0	0.486667	37.4763		7.28333	1	0	0.486667	34.9108
7.3	0	0	0.487778	35.1494		7.3	2	0	0.487778	34.7405		7.3	0	0	0.487778	37.4753		7.3	1	0	0.487778	34.9218
7.31667	0	0	0.488889	35.1474		7.31667	2	1	0.488889	34.7838		7.31667	0	0	0.488889	37.485		7.31667	1	0	0.488889	34.9121
7.33333	1	0	0.49	35.1477		7.33333	2	0	0.49	34.834		7.33333	1	0	0.49	37.4927		7.33333	1	0	0.49	34.8941
7.35	1	0	0.491111	35.1496		7.35	2	0	0.491111	34.879		7.35	1	0	0.491111	37.5006		7.35	1	0	0.491111	34.8757
7.36667	1	0	0.492222	35.1435		7.36667	1	0	0.492222	34.8773		7.36667	1	0	0.492222	37.507		7.36667	0	0	0.492222	34.8492
7.38333	1	0	0.493333	35.1392		7.38333	2	0	0.493333	34.8682		7.38333	1	0	0.493333	37.5022		7.38333	1	0	0.493333	34.8396
7.4	2	0	0.494444	35.139		7.4	2	0	0.494444	34.8398		7.4	1	0	0.494444	37.4899		7.4	1	0	0.494444	34.8388
7.41667	1	0	0.495556	35.1343		7.41667	2	0	0.495556	34.8049		7.41667	1	0	0.495556	37.4753		7.41667	1	0	0.495556	34.8417
7.43333	1	0	0.496667	35.1217		7.43333	2	0	0.496667	34.7792		7.43333	1	0	0.496667	37.4635		7.43333	1	0	0.496667	34.846
7.45	1	0	0.497778	35.1107		7.45	2	0	0.497778	34.756		7.45	1	0	0.497778	37.4632		7.45	1	0	0.497778	34.8487
7.46667	1	0	0.498889	35.1009		7.46667	2	0	0.498889	34.7363		7.46667	1	0	0.498889	37.464		7.46667	1	0	0.498889	34.8452
7.48333	1	0	0.5	35.0925		7.48333	2	0	0.5	34.7216		7.48333	1	0	0.5	37.4535		7.48333	0	0	0.5	34.8403
7.5	1	0	0.501111	35.0878		7.5	2	0	0.501111	34.7125		7.5	0	0	0.501111	37.4315		7.5	0	0	0.501111	34.8334
7.51667	1	0	0.502222	35.0801		7.51667	1	0	0.502222	34.7076		7.51667	1	0	0.502222	37.414		7.51667	0	0	0.502222	34.8246
7.53333	1	0	0.503333	35.0665		7.53333	1	0	0.503333	34.7075		7.53333	1	0	0.503333	37.4026		7.53333	1	0	0.503333	34.8138
7.55	1	0	0.504444	35.0546		7.55	1	0	0.504444	34.7117		7.55	1	0	0.504444	37.4007		7.55	2	2	0.504444	34.8022
7.56667	1	0	0.505556	35.0495		7.56667	1	0	0.505556	34.7139		7.56667	1	0	0.505556	37.4046		7.56667	2	0	0.505556	34.789
7.58333	1	0	0.506667	35.0362		7.58333	1	0	0.506667	34.716		7.58333	1	0	0.506667	37.4049		7.58333	2	0	0.506667	34.7958
7.6	1	0	0.507778	35.0195		7.6	1	0	0.507778	34.7272		7.6	1	0	0.507778	37.3906		7.6	2	0	0.507778	34.8008
7.61667	1	0	0.508889	35.0077		7.61667	1	0	0.508889	34.7385		7.61667	1	0	0.508889	37.3885		7.61667	2	0	0.508889	34.8053
7.63333	1	0	0.51	35.0022		7.63333	1	0	0.51	34.7466		7.63333	1	0	0.51	37.3848		7.63333	2	0	0.51	34.8117
7.65	1	0	0.511111	34.9999		7.65	1	0	0.511111	34.7606		7.65	1	0	0.511111	37.3843		7.65	2	1	0.511111	34.8207
7.66667	1	0	0.512222	34.9993		7.66667	0	0	0.512222	34.7729		7.66667	1	0	0.512222	37.3876		7.66667	2	0	0.512222	34.8277
7.68333	1	0	0.513333	35.0005		7.68333	0	0	0.513333	34.7842		7.68333	1	0	0.513333	37.3887		7.68333	2	2	0.513333	34.8376
7.7	1	0	0.514444	35.0017		7.7	1	0	0.514444	34.7956		7.7	1	0	0.514444	37.3874		7.7	2	3	0.514444	34.8437
7.71667	2	0	0.515556	34.9983		7.71667	1	0	0.515556	34.8117		7.71667	1	0	0.515556	37.3696		7.71667	2	0	0.515556	34.8415
7.73333	2	0	0.516667	34.9949		7.73333	1	0	0.516667	34.8038		7.73333	0	0	0.516667	37.3482		7.73333	2	0	0.516667	34.8391
7.75	2	0	0.517778	34.9937		7.75	1	0	0.517778	34.7893		7.75	0	0	0.517778	37.3375		7.75	2	0	0.517778	34.8267
7.76667	2	0	0.518889	34.9902		7.76667	1	0	0.518889	34.7811		7.76667	0	0	0.518889	37.3409		7.76667	2	0	0.518889	34.813
7.78333	2	0	0.52	34.9863		7.78333	1	0	0.52	34.7696		7.78333	0	0	0.52	37.3502		7.78333	2	1	0.52	34.8149
7.8	2	0	0.521111	34.9855		7.8	1	0	0.521111	34.758		7.8	1	0	0.521111	37.3626		7.8	2	1	0.521111	34.8142
7.81667	2	0	0.522222	34.9877		7.81667	1	0	0.522222	34.755		7.81667	2	0	0.522222	37.3597		7.81667	2	1	0.522222	34.8211
7.83333	2	0	0.523333	34.9907		7.83333	0	0	0.523333	34.7559		7.83333	2	0	0.523333	37.3657		7.83333	2	0	0.523333	34.83
7.85	2	0	0.524444	34.9825		7.85	1	0	0.524444	34.76		7.85	2	0	0.524444	37.3597		7.85	2	0	0.524444	34.8329
7.86667	2	0	0.525556	34.9623		7.86667	1	0	0.525556	34.7648		7.86667	2	0	0.525556	37.3421		7.86667	2	0	0.525556	34.8333
7.88333	2	0	0.526667	34.9408		7.88333	1	0	0.526667	34.7613		7.88333	2	0	0.526667	37.328		7.88333	2	0	0.526667	34.8331
7.9	2	0	0.527778	34.9194		7.9	1	0	0.527778	34.7572		7.9	2	0	0.527778	37.3258		7.9	2	0	0.527778	34.8377
7.91667	2	0	0.528889	34.9051		7.91667	1	0	0.528889	34.7557		7.91667	2	0	0.528889	37.3233		7.91667	2	0	0.528889	34.8403
7.93333	2	0	0.53	34.9014		7.93333	1	0	0.53	34.7534		7.93333	2	2	0.53	37.33		7.93333	1	0	0.53	34.8345
7.95	1	0	0.531111	34.9032		7.95	1	0	0.531111	34.7407		7.95	2	2	0.531111	37.3391		7.95	1	0	0.531111	34.8296
7.96667	1	0	0.532222	34.8936		7.96667	1	0	0.532222	34.7257		7.96667	2	0	0.532222	37.3376		7.96667	1	0	0.532222	34.8249
7.98333	1	0	0.533333	34.8873		7.98333	1	0	0.533333	34.7219		7.98333	2	0	0.533333	37.339		7.98333	1	0	0.533333	34.8188
8	1	0	0.534444	34.8835		8	1	0	0.534444	34.7192		8	2	0	0.534444	37.3344		8	1	0	0.534444	34.8146
8.01667	1	0	0.535556	34.8834		8.01667	1	0	0.535556	34.7185		8.01667	2	1	0.535556	37.3278		8.01667	1	0	0.535556	34.8207
8.03333	1	0	0.536667	34.881		8.03333	1	0	0.536667	34.722		8.03333	2	2	0.536667	37.3265		8.03333	1	0	0.536667	34.8322
8.05	1	0	0.537778	34.8844		8.05	1	0	0.537778	34.7214		8.05	2	2	0.537778	37.3571		8.05	1	0	0.537778	34.8448
8.06667	1	0	0.538889	34.8779		8.06667	1	0	0.538889	34.7209		8.06667	2	1	0.538889	37.3714		8.06667	1	0	0.538889	34.8556
8.08333	1	0	0.54	34.868		8.08333	1	0	0.54	34.7223		8.08333	2	3	0.54	37.3774		8.08333	1	0	0.54	34.8669
8.1	1	0	0.541111	34.8596		8.1	1	0	0.541111	34.7232		8.1	2	3	0.541111	37.3856		8.1	1	0	0.541111	34.876
8.11667	1	0	0.542222	34.8551		8.11667	1	0	0.542222	34.7237		8.11667	2	2	0.542222	37.3751		8.11667	1	0	0.542222	34.8848
8.13333	1	0	0.543333	34.8491		8.13333	1	0	0.543333	34.7221		8.13333	2	0	0.543333	37.3822		8.13333	0	0	0.543333	34.8985
8.15	2	0	0.544444	34.8434		8.15	0	0	0.544444	34.7177		8.15	2	0	0.544444	37.3769		8.15	1	0	0.544444	34.9197
8.16667	2	0	0.545556	34.8394		8.16667	0	0	0.545556	34.7143		8.16667	2	0	0.545556	37.3666		8.16667	1	0	0.545556	34.9506
8.18333	2	0	0.546667	34.8329		8.18333	0	0	0.546667	34.7131		8.18333	2	0	0.546667	37.3621		8.18333	1	0	0.546667	34.9791
8.2	2	0	0.547778	34.8241		8.2	1	0	0.547778	34.7128		8.2	2	0	0.547778	37.3578		8.2	1	0	0.547778	35.0029
8.21667	2	0	0.548889	34.8131		8.21667	2	0	0.548889	34.7094		8.21667	1	0	0.548889	37.3658		8.21667	1	0	0.548889	35.0343
8.23333	1	0	0.55	34.8058		8.23333	2	0	0.55	34.705		8.23333	1	0	0.55	37.3725		8.23333	1	0	0.55	35.075
8.25	1	0	0.551111	34.8059		8.25	1	0	0.551111	34.697		8.25	1	0	0.551111	37.3961		8.25	1	0	0.551111	35.1144
8.26667	1	0	0.552222	34.8046		8.26667	2	0	0.552222	34.6944		8.26667	1	0	0.552222	37.4126		8.26667	1	0	0.552222	35.1549
8.28333	1	0	0.553333	34.8028		8.28333	1	0	0.553333	34.6988		8.28333	1	0	0.553333	37.4175		8.28333	1	0	0.553333	35.2008
8.3	1	0	0.554444	34.803		8.3	1	0	0.554444	34.7022		8.3	1	0	0.554444	37.4391		8.3	1	0	0.554444	35.2476
8.31667	1	0	0.555556	34.7871		8.31667	1	0	0.555556	34.7035		8.31667	1	0	0.555556	37.446		8.31667	1	0	0.555556	35.2891
8.33333	1	0	0.556667	34.7741		8.33333	1	0	0.556667	34.7021		8.33333	1	0	0.556667	37.4535		8.33333	1	0	0.556667	35.3206
8.35	1	0	0.557778	34.7668		8.35	1	0	0.557778	34.7009		8.35	1	0	0.557778	37.4698		8.35	1	0	0.557778	35.346
8.36667	1	0	0.558889	34.7535		8.36667	1	0	0.558889	34.7001		8.36667	1	0	0.558889	37.4578		8.36667	1	0	0.558889	35.3636
8.38334	1	0	0.56	34.7503		8.38334	1	0	0.56	34.7		8.38334	1	0	0.56	37.4499		8.38334	1	0	0.56	35.3794
8.4	1	0	0.561111	34.7504		8.4	1	0	0.561111	34.7039		8.4	1	0	0.561111	37.4365		8.4	1	0	0.561111	35.3979
8.41667	1	0	0.562222	34.7546		8.41667	1	0	0.562222	34.7067		8.41667	1	0	0.562222	37.4254		8.41667	0	0	0.562222	35.4027
8.43334	1	0	0.563333	34.7629		8.43334	1	0	0.563333	34.7119		8.43334	1	0	0.563333	37.4081		8.43334	0	0	0.563333	35.3698
8.45	1	0	0.564444	34.7717		8.45	1	0	0.564444	34.7141		8.45	1	0	0.564444	37.3967		8.45	0	0	0.564444	35.3413
8.46667	0	0	0.565556	34.7708		8.46667	1	0	0.565556	34.7031		8.46667	1	0	0.565556	37.3929		8.46667	0	0	0.565556	35.2957
8.48334	1	0	0.566667	34.7636		8.48334	2	0	0.566667	34.6971		8.48334	1	0	0.566667	37.3851		8.48334	1	0	0.566667	35.2479
8.5	1	0	0.567778	34.7606		8.5	1	0	0.567778	34.6913		8.5	1	0	0.567778	37.3786		8.5	1	0	0.567778	35.2046
8.51667	1	0	0.568889	34.7554		8.51667	1	0	0.568889	34.6781		8.51667	1	0	0.568889	37.3838		8.51667	1	0	0.568889	35.1737
8.53334	1	0	0.57	34.7581		8.53334	1	0	0.57	34.6646		8.53334	0	0	0.57	37.3849		8.53334	1	0	0.57	35.1423
8.55	1	0	0.571111	34.7594		8.55	1	0	0.571111	34.6624		8.55	0	0	0.571111	37.3746		8.55	1	0	0.571111	35.1196
8.56667	1	0	0.572222	34.7605		8.56667	1	0	0.572222	34.6662		8.56667	0	0	0.572222	37.3685		8.56667	1	0	0.572222	35.104
8.58334	0	0	0.573333	34.7587		8.58334	1	0	0.573333	34.6682		8.58334	1	0	0.573333	37.3574		8.58334	1	0	0.573333	35.0896
8.6	1	0	0.574444	34.7627		8.6	1	0	0.574444	34.6734		8.6	1	0	0.574444	37.3454		8.6	1	0	0.574444	35.0795
8.61667	1	0	0.575556	34.7498		8.61667	1	0	0.575556	34.6762		8.61667	1	0	0.575556	37.3334		8.61667	1	0	0.575556	35.0654
8.63334	1	0	0.576667	34.7303		8.63334	2	0	0.576667	34.6718		8.63334	1	0	0.576667	37.3293		8.63334	1	0	0.576667	35.0504
8.65	1	0	0.577778	34.7146		8.65	2	2	0.577778	34.668		8.65	1	0	0.577778	37.327		8.65	1	0	0.577778	35.0378
8.66667	1	0	0.578889	34.7039		8.66667	2	1	0.578889	34.6667		8.66667	1	0	0.578889	37.3299		8.66667	1	0	0.578889	35.0323
8.68334	1	0	0.58	34.7012		8.68334	2	3	0.58	34.6685		8.68334	1	0	0.58	37.3424		8.68334	1	0	0.58	35.0356
8.7	1	0	0.581111	34.6956		8.7	2	0	0.581111	34.6622		8.7	1	0	0.581111	37.3452		8.7	1	0	0.581111	35.0331
8.71667	0	0	0.582222	34.6869		8.71667	2	0	0.582222	34.6557		8.71667	1	0	0.582222	37.3284		8.71667	1	0	0.582222	35.0431
8.73334	0	0	0.583333	34.6854		8.73334	2	0	0.583333	34.6568		8.73334	1	0	0.583333	37.3237		8.73334	1	0	0.583333	35.0491
8.75	0	0	0.584444	34.6905		8.75	2	0	0.584444	34.6591		8.75	1	0	0.584444	37.3334		8.75	1	0	0.584444	35.0453
8.76667	1	0	0.585556	34.6938		8.76667	2	0	0.585556	34.6604		8.76667	1	0	0.585556	37.3333		8.76667	1	0	0.585556	35.0389
8.78334	1	0	0.586667	34.6964		8.78334	2	2	0.586667	34.6615		8.78334	1	0	0.586667	37.3318		8.78334	1	0	0.586667	35.0316
8.8	1	0	0.587778	34.6944		8.8	2	1	0.587778	34.6622		8.8	1	0	0.587778	37.338		8.8	1	0	0.587778	35.028
8.81667	1	0	0.588889	34.6893		8.81667	2	3	0.588889	34.6539		8.81667	1	0	0.588889	37.3411		8.81667	0	0	0.588889	35.0271
8.83334	1	0	0.59	34.6779		8.83334	2	2	0.59	34.6308		8.83334	0	0	0.59	37.3423		8.83334	0	0	0.59	35.0211
8.85	1	0	0.591111	34.6708		8.85	2	1	0.591111	34.6216		8.85	0	0	0.591111	37.3477		8.85	1	0	0.591111	35.0085
8.86667	1	0	0.592222	34.6643		8.86667	2	0	0.592222	34.6239		8.86667	1	0	0.592222	37.3453		8.86667	1	0	0.592222	34.9896
8.88334	1	0	0.593333	34.6596		8.88334	2	1	0.593333	34.6288		8.88334	1	0	0.593333	37.3539		8.88334	1	0	0.593333	34.9817
8.9	1	0	0.594444	34.6585		8.9	2	0	0.594444	34.637		8.9	1	0	0.594444	37.3574		8.9	1	0	0.594444	34.9794
8.91667	1	0	0.595556	34.6592		8.91667	2	1	0.595556	34.6384		8.91667	1	0	0.595556	37.3464		8.91667	1	0	0.595556	34.9771
8.93334	1	0	0.596667	34.6598		8.93334	2	0	0.596667	34.6366		8.93334	1	0	0.596667	37.3261		8.93334	1	0	0.596667	34.9697
8.95	1	0	0.597778	34.66		8.95	2	1	0.597778	34.6362		8.95	1	0	0.597778	37.314		8.95	2	0	0.597778	34.952
8.96667	1	0	0.598889	34.6614		8.96667	2	0	0.598889	34.6335		8.96667	1	0	0.598889	37.3198		8.96667	2	0	0.598889	34.9564
8.98334	0	0	0.6	34.6661		8.98334	2	0	0.6	34.6364		8.98334	1	0	0.6	37.333		8.98334	2	0	0.6	34.9661
9	1	0	0.601111	34.6628		9	2	3	0.601111	34.6441		9	1	0	0.601111	37.337		9	2	0	0.601111	34.9756
9.01667	1	0	0.602222	34.6466		9.01667	2	1	0.602222	34.6538		9.01667	1	0	0.602222	37.3331		9.01667	2	0	0.602222	34.9807
9.03334	1	0	0.603333	34.641		9.03334	2	1	0.603333	34.6615		9.03334	1	0	0.603333	37.3263		9.03334	2	0	0.603333	34.9885
9.05	1	0	0.604444	34.6312		9.05	2	0	0.604444	34.6603		9.05	1	0	0.604444	37.3199		9.05	2	3	0.604444	34.9988
9.06667	1	0	0.605556	34.6248		9.06667	2	0	0.605556	34.6436		9.06667	1	0	0.605556	37.3171		9.06667	2	1	0.605556	34.9985
9.08334	1	0	0.606667	34.6268		9.08334	2	0	0.606667	34.6335		9.08334	1	0	0.606667	37.3013		9.08334	2	0	0.606667	35.0023
9.1	1	0	0.607778	34.6281		9.1	1	0	0.607778	34.625		9.1	1	0	0.607778	37.2993		9.1	2	0	0.607778	35.0124
9.11667	0	0	0.608889	34.6358		9.11667	1	0	0.608889	34.6208		9.11667	1	0	0.608889	37.3112		9.11667	2	0	0.608889	35.0105
9.13334	1	0	0.61	34.6399		9.13334	1	0	0.61	34.6212		9.13334	0	0	0.61	37.3132		9.13334	2	0	0.61	35.0035
9.15	1	0	0.611111	34.6397		9.15	1	0	0.611111	34.6238		9.15	1	0	0.611111	37.3186		9.15	2	0	0.611111	34.9972
9.16667	1	0	0.612222	34.6394		9.16667	1	0	0.612222	34.6309		9.16667	0	0	0.612222	37.3238		9.16667	2	0	0.612222	34.9956
9.18334	2	0	0.613333	34.6376		9.18334	1	0	0.613333	34.6243		9.18334	1	0	0.613333	37.3302		9.18334	2	2	0.613333	34.9941
9.2	2	0	0.614444	34.6394		9.2	1	0	0.614444	34.6221		9.2	1	0	0.614444	37.3376		9.2	2	0	0.614444	34.9937
9.21667	2	0	0.615556	34.6377		9.21667	1	2	0.615556	34.6222		9.21667	1	0	0.615556	37.3507		9.21667	2	0	0.615556	34.9871
9.23334	2	0	0.616667	34.6337		9.23334	1	0	0.616667	34.6123		9.23334	1	0	0.616667	37.3563		9.23334	2	2	0.616667	34.9652
9.25	2	0	0.617778	34.6379		9.25	1	0	0.617778	34.6144		9.25	2	1	0.617778	37.3382		9.25	2	2	0.617778	34.9438
9.26667	2	0	0.618889	34.6576		9.26667	1	0	0.618889	34.6112		9.26667	2	0	0.618889	37.3321		9.26667	2	0	0.618889	34.9218
9.28334	2	0	0.62	34.6707		9.28334	1	0	0.62	34.6136		9.28334	2	0	0.62	37.3201		9.28334	2	0	0.62	34.9173
9.3	2	0	0.621111	34.6798		9.3	1	0	0.621111	34.6166		9.3	2	0	0.621111	37.3076		9.3	2	1	0.621111	34.9188
9.31667	2	0	0.622222	34.6959		9.31667	1	0	0.622222	34.6142		9.31667	2	0	0.622222	37.3028		9.31667	2	0	0.622222	34.9232
9.33334	2	0	0.623333	34.7271		9.33334	0	0	0.623333	34.6009		9.33334	2	0	0.623333	37.3009		9.33334	2	1	0.623333	34.9319
9.35	2	0	0.624444	34.7665		9.35	1	0	0.624444	34.5922		9.35	2	1	0.624444	37.3028		9.35	2	4	0.624444	34.9416
9.36667	2	1	0.625556	34.8036		9.36667	1	0	0.625556	34.5909		9.36667	2	0	0.625556	37.3094		9.36667	2	0	0.625556	34.9475
9.38334	2	0	0.626667	34.8391		9.38334	1	1	0.626667	34.5969		9.38334	2	0	0.626667	37.3227		9.38334	2	1	0.626667	34.9494
9.4	2	0	0.627778	34.8756		9.4	2	2	0.627778	34.6034		9.4	1	0	0.627778	37.3177		9.4	1	0	0.627778	34.9457
9.41667	2	0	0.628889	34.9046		9.41667	1	0	0.628889	34.614		9.41667	1	0	0.628889	37.3023		9.41667	1	0	0.628889	34.9417
9.43334	2	0	0.63	34.9291		9.43334	1	0	0.63	34.6273		9.43334	1	0	0.63	37.2911		9.43334	1	1	0.63	34.9428
9.45	2	0	0.631111	34.9465		9.45	1	0	0.631111	34.6459		9.45	1	0	0.631111	37.2876		9.45	1	0	0.631111	34.9503
9.46667	2	0	0.632222	34.9598		9.46667	1	0	0.632222	34.6701		9.46667	1	0	0.632222	37.289		9.46667	1	0	0.632222	34.957
9.48334	2	0	0.633333	34.9725		9.48334	1	0	0.633333	34.6833		9.48334	1	0	0.633333	37.2828		9.48334	1	0	0.633333	34.9509
9.5	2	0	0.634444	34.9828		9.5	1	0	0.634444	34.6977		9.5	1	0	0.634444	37.2616		9.5	1	0	0.634444	34.9422
9.51667	2	0	0.635556	34.995		9.51667	1	0	0.635556	34.7087		9.51667	1	0	0.635556	37.2565		9.51667	1	0	0.635556	34.929
9.53334	2	0	0.636667	35.0155		9.53334	0	0	0.636667	34.7129		9.53334	1	0	0.636667	37.2611		9.53334	1	0	0.636667	34.9245
9.55	2	0	0.637778	35.0278		9.55	0	0	0.637778	34.7203		9.55	1	0	0.637778	37.2569		9.55	1	0	0.637778	34.9238
9.56667	1	0	0.638889	35.0313		9.56667	1	0	0.638889	34.7296		9.56667	1	0	0.638889	37.2516		9.56667	2	0	0.638889	34.9337
9.58334	1	0	0.64	35.0378		9.58334	2	0	0.64	34.7439		9.58334	1	0	0.64	37.2469		9.58334	1	0	0.64	34.9413
9.6	1	0	0.641111	35.0483		9.6	2	0	0.641111	34.7535		9.6	1	0	0.641111	37.251		9.6	2	2	0.641111	34.9476
9.61667	1	0	0.642222	35.059		9.61667	2	0	0.642222	34.7529		9.61667	1	0	0.642222	37.2669		9.61667	2	1	0.642222	34.9449
9.63334	1	0	0.643333	35.0432		9.63334	2	0	0.643333	34.7503		9.63334	1	0	0.643333	37.2627		9.63334	2	1	0.643333	34.9433
9.65	1	0	0.644444	35.0055		9.65	2	0	0.644444	34.752		9.65	0	0	0.644444	37.2586		9.65	2	0	0.644444	34.946
9.66667	1	0	0.645556	34.9617		9.66667	2	0	0.645556	34.7443		9.66667	0	0	0.645556	37.2569		9.66667	2	1	0.645556	34.9522
9.68334	1	0	0.646667	34.9154		9.68334	2	0	0.646667	34.7398		9.68334	1	0	0.646667	37.2555		9.68334	2	0	0.646667	34.942
9.7	0	0	0.647778	34.8739		9.7	2	0	0.647778	34.7374		9.7	1	0	0.647778	37.2577		9.7	1	1	0.647778	34.9218
9.71667	1	0	0.648889	34.8377		9.71667	1	0	0.648889	34.7332		9.71667	1	0	0.648889	37.2695		9.71667	2	1	0.648889	34.9029
9.73334	1	0	0.65	34.8061		9.73334	1	0	0.65	34.7321		9.73334	1	0	0.65	37.2741		9.73334	1	0	0.65	34.9009
9.75	2	0	0.651111	34.7837		9.75	1	0	0.651111	34.7313		9.75	1	0	0.651111	37.2685		9.75	1	0	0.651111	34.9001
9.76667	1	0	0.652222	34.775		9.76667	1	0	0.652222	34.7292		9.76667	1	0	0.652222	37.2792		9.76667	1	0	0.652222	34.8972
9.78334	1	0	0.653333	34.7683		9.78334	1	0	0.653333	34.723		9.78334	1	0	0.653333	37.2952		9.78334	1	0	0.653333	34.9036
9.8	1	0	0.654444	34.7672		9.8	1	0	0.654444	34.7195		9.8	1	0	0.654444	37.3073		9.8	1	0	0.654444	34.9072
9.81667	1	0	0.655556	34.7611		9.81667	1	0	0.655556	34.7138		9.81667	1	0	0.655556	37.3104		9.81667	1	0	0.655556	34.9078
9.83334	1	0	0.656667	34.7494		9.83334	1	0	0.656667	34.7175		9.83334	2	0	0.656667	37.2953		9.83334	1	0	0.656667	34.9141
9.85	1	0	0.657778	34.7419		9.85	1	0	0.657778	34.7302		9.85	1	0	0.657778	37.2832		9.85	1	0	0.657778	34.9297
9.86667	1	0	0.658889	34.7268		9.86667	1	0	0.658889	34.7243		9.86667	1	0	0.658889	37.2812		9.86667	1	0	0.658889	34.9385
9.88334	1	0	0.66	34.7209		9.88334	1	0	0.66	34.7265		9.88334	1	0	0.66	37.27		9.88334	1	0	0.66	34.9382
9.9	1	0	0.661111	34.712		9.9	1	0	0.661111	34.7306		9.9	1	0	0.661111	37.2636		9.9	1	0	0.661111	34.9443
9.91667	1	0	0.662222	34.7169		9.91667	1	0	0.662222	34.7323		9.91667	1	0	0.662222	37.2608		9.91667	1	0	0.662222	34.9522
9.93334	1	0	0.663333	34.7162		9.93334	1	0	0.663333	34.7259		9.93334	1	0	0.663333	37.2545		9.93334	1	0	0.663333	34.9443
9.95	2	0	0.664444	34.722		9.95	1	0	0.664444	34.7292		9.95	0	0	0.664444	37.2578		9.95	1	0	0.664444	34.9365
9.96667	1	0	0.665556	34.7179		9.96667	1	0	0.665556	34.7379		9.96667	2	0	0.665556	37.2522		9.96667	0	0	0.665556	34.9263
9.98334	1	0	0.666667	34.7161		9.98334	1	0	0.666667	34.7443		9.98334	2	0	0.666667	37.2373		9.98334	0	0	0.666667	34.9115
10	1	0	0.667778	34.7118		10	1	0	0.667778	34.7542		10	2	0	0.667778	37.2283		10	1	0	0.667778	34.9092
10.0167	1	0	0.668889	34.7032		10.0167	0	0	0.668889	34.7581		10.0167	2	1	0.668889	37.2268		10.0167	1	0	0.668889	34.9126
10.0333	1	0	0.67	34.6963		10.0333	0	0	0.67	34.7642		10.0333	2	0	0.67	37.2282		10.0333	1	0	0.67	34.9139
10.05	1	0	0.671111	34.6942		10.05	1	0	0.671111	34.7737		10.05	2	0	0.671111	37.2244		10.05	1	0	0.671111	34.9154
10.0667	1	0	0.672222	34.6948		10.0667	1	0	0.672222	34.7774		10.0667	2	0	0.672222	37.2131		10.0667	1	0	0.672222	34.9135
10.0833	1	0	0.673333	34.6983		10.0833	0	0	0.673333	34.7773		10.0833	2	0	0.673333	37.2051		10.0833	1	0	0.673333	34.9128
10.1	2	0	0.674444	34.708		10.1	1	2	0.674444	34.7814		10.1	2	1	0.674444	37.1891		10.1	0	0	0.674444	34.9088
10.1167	2	0	0.675556	34.7091		10.1167	1	0	0.675556	34.7839		10.1167	2	0	0.675556	37.1609		10.1167	0	0	0.675556	34.9017
10.1333	2	0	0.676667	34.7028		10.1333	1	0	0.676667	34.7766		10.1333	2	0	0.676667	37.1434		10.1333	0	0	0.676667	34.8898
10.15	2	0	0.677778	34.6945		10.15	1	0	0.677778	34.7695		10.15	2	0	0.677778	37.1473		10.15	1	0	0.677778	34.8853
10.1667	2	0	0.678889	34.6839		10.1667	1	0	0.678889	34.7767		10.1667	2	0	0.678889	37.1446		10.1667	1	0	0.678889	34.8838
10.1833	2	0	0.68	34.6815		10.1833	1	0	0.68	34.7771		10.1833	1	0	0.68	37.1348		10.1833	1	1	0.68	34.8886
10.2	2	0	0.681111	34.686		10.2	1	0	0.681111	34.776		10.2	1	0	0.681111	37.1356		10.2	1	0	0.681111	34.8906
10.2167	2	0	0.682222	34.6883		10.2167	1	1	0.682222	34.7793		10.2167	1	0	0.682222	37.1512		10.2167	2	0	0.682222	34.8952
10.2333	2	0	0.683333	34.6892		10.2333	1	0	0.683333	34.7882		10.2333	1	0	0.683333	37.1607		10.2333	1	0	0.683333	34.8999
10.25	2	0	0.684444	34.6965		10.25	2	3	0.684444	34.7984		10.25	1	0	0.684444	37.164		10.25	1	1	0.684444	34.9039
10.2667	2	0	0.685556	34.6996		10.2667	2	3	0.685556	34.8094		10.2667	1	0	0.685556	37.1658		10.2667	1	0	0.685556	34.9095
10.2833	2	0	0.686667	34.7004		10.2833	2	0	0.686667	34.8157		10.2833	1	0	0.686667	37.1745		10.2833	1	0	0.686667	34.8999
10.3	2	0	0.687778	34.6972		10.3	2	0	0.687778	34.8366		10.3	1	0	0.687778	37.1829		10.3	1	0	0.687778	34.8948
10.3167	2	0	0.688889	34.6875		10.3167	2	0	0.688889	34.8549		10.3167	1	0	0.688889	37.182		10.3167	1	0	0.688889	34.8942
10.3333	1	0	0.69	34.6647		10.3333	2	0	0.69	34.8692		10.3333	1	0	0.69	37.1793		10.3333	1	0	0.69	34.8878
10.35	1	0	0.691111	34.6433		10.35	2	1	0.691111	34.8761		10.35	1	0	0.691111	37.182		10.35	1	0	0.691111	34.8772
10.3667	1	0	0.692222	34.6321		10.3667	2	1	0.692222	34.879		10.3667	1	0	0.692222	37.1793		10.3667	1	0	0.692222	34.8675
10.3833	1	0	0.693333	34.6302		10.3833	2	1	0.693333	34.8852		10.3833	0	0	0.693333	37.1802		10.3833	2	1	0.693333	34.8612
10.4	1	0	0.694444	34.6343		10.4	2	0	0.694444	34.8918		10.4	1	0	0.694444	37.1814		10.4	2	3	0.694444	34.8541
10.4167	1	0	0.695556	34.6391		10.4167	2	0	0.695556	34.8988		10.4167	1	0	0.695556	37.1779		10.4167	1	0	0.695556	34.8531
10.4333	0	0	0.696667	34.6416		10.4333	2	0	0.696667	34.9057		10.4333	1	0	0.696667	37.176		10.4333	2	0	0.696667	34.8494
10.45	1	0	0.697778	34.6452		10.45	2	0	0.697778	34.9134		10.45	1	0	0.697778	37.1683		10.45	2	0	0.697778	34.8454
10.4667	1	0	0.698889	34.6492		10.4667	1	0	0.698889	34.9214		10.4667	1	0	0.698889	37.1603		10.4667	2	0	0.698889	34.8497
10.4833	1	0	0.7	34.6549		10.4833	1	0	0.7	34.9342		10.4833	1	0	0.7	37.1552		10.4833	2	0	0.7	34.8445
10.5	1	0	0.701111	34.6534		10.5	1	0	0.701111	34.9483		10.5	1	0	0.701111	37.1589		10.5	2	0	0.701111	34.8341
10.5167	1	0	0.702222	34.6545		10.5167	1	0	0.702222	34.9588		10.5167	0	0	0.702222	37.1656		10.5167	2	0	0.702222	34.8286
10.5333	2	0	0.703333	34.6573		10.5333	1	0	0.703333	34.9713		10.5333	1	0	0.703333	37.1704		10.5333	2	1	0.703333	34.8275
10.55	1	0	0.704444	34.6444		10.55	1	0	0.704444	34.9909		10.55	1	0	0.704444	37.1688		10.55	2	4	0.704444	34.8321
10.5667	1	0	0.705556	34.6301		10.5667	1	0	0.705556	35.0004		10.5667	1	0	0.705556	37.1669		10.5667	2	0	0.705556	34.8335
10.5833	1	0	0.706667	34.6253		10.5833	1	0	0.706667	35.0041		10.5833	1	0	0.706667	37.1658		10.5833	2	1	0.706667	34.8304
10.6	1	0	0.707778	34.6239		10.6	1	0	0.707778	35.0083		10.6	1	0	0.707778	37.162		10.6	2	1	0.707778	34.8257
10.6167	1	0	0.708889	34.6298		10.6167	1	0	0.708889	35.0131		10.6167	1	0	0.708889	37.1519		10.6167	2	0	0.708889	34.8225
10.6333	1	0	0.71	34.6361		10.6333	1	0	0.71	35.0205		10.6333	1	0	0.71	37.1436		10.6333	2	1	0.71	34.8179
10.65	0	0	0.711111	34.6401		10.65	1	0	0.711111	35.0293		10.65	1	0	0.711111	37.1491		10.65	2	2	0.711111	34.8234
10.6667	1	0	0.712222	34.6486		10.6667	1	0	0.712222	35.0354		10.6667	1	0	0.712222	37.149		10.6667	2	0	0.712222	34.8315
10.6833	1	0	0.713333	34.6565		10.6833	1	0	0.713333	35.0454		10.6833	1	0	0.713333	37.1369		10.6833	1	0	0.713333	34.8366
10.7	1	0	0.714444	34.6626		10.7	1	0	0.714444	35.0512		10.7	1	0	0.714444	37.1344		10.7	1	0	0.714444	34.8439
10.7167	1	0	0.715556	34.6594		10.7167	1	0	0.715556	35.0552		10.7167	1	0	0.715556	37.1378		10.7167	1	0	0.715556	34.8497
10.7333	0	0	0.716667	34.6561		10.7333	0	0	0.716667	35.0659		10.7333	0	0	0.716667	37.1542		10.7333	1	0	0.716667	34.8572
10.75	0	0	0.717778	34.658		10.75	1	0	0.717778	35.0784		10.75	0	0	0.717778	37.1652		10.75	1	0	0.717778	34.8703
10.7667	2	0	0.718889	34.6596		10.7667	1	0	0.718889	35.09		10.7667	1	0	0.718889	37.1624		10.7667	1	0	0.718889	34.8811
10.7833	2	0	0.72	34.6613		10.7833	1	0	0.72	35.1001		10.7833	1	0	0.72	37.1483		10.7833	1	0	0.72	34.8941
10.8	2	0	0.721111	34.6637		10.8	1	0	0.721111	35.1119		10.8	1	0	0.721111	37.1365		10.8	1	0	0.721111	34.8762
10.8167	2	0	0.722222	34.6661		10.8167	1	0	0.722222	35.1358		10.8167	2	0	0.722222	37.1288		10.8167	1	0	0.722222	34.8498
10.8333	2	0	0.723333	34.6714		10.8333	1	0	0.723333	35.1521		10.8333	2	0	0.723333	37.1259		10.8333	1	0	0.723333	34.8367
10.85	2	0	0.724444	34.665		10.85	1	0	0.724444	35.1648		10.85	2	3	0.724444	37.1243		10.85	1	0	0.724444	34.825
10.8667	2	0	0.725556	34.6489		10.8667	1	0	0.725556	35.1856		10.8667	2	2	0.725556	37.1378		10.8667	1	0	0.725556	34.8163
10.8833	2	3	0.726667	34.6373		10.8833	2	0	0.726667	35.2191		10.8833	2	1	0.726667	37.1409		10.8833	0	0	0.726667	34.8129
10.9	2	0	0.727778	34.6283		10.9	2	0	0.727778	35.2437		10.9	2	0	0.727778	37.1461		10.9	1	0	0.727778	34.816
10.9167	2	0	0.728889	34.6268		10.9167	2	0	0.728889	35.2751		10.9167	2	0	0.728889	37.1471		10.9167	2	1	0.728889	34.8146
10.9333	2	0	0.73	34.6292		10.9333	2	0	0.73	35.3009		10.9333	2	0	0.73	37.1502		10.9333	2	0	0.73	34.8096
10.95	2	0	0.731111	34.6383		10.95	2	1	0.731111	35.3139		10.95	2	0	0.731111	37.1515		10.95	1	0	0.731111	34.8006
10.9667	2	0	0.732222	34.6478		10.9667	2	1	0.732222	35.3225		10.9667	2	2	0.732222	37.1476		10.9667	1	0	0.732222	34.7957
10.9833	2	0	0.733333	34.6526		10.9833	2	0	0.733333	35.3421		10.9833	2	0	0.733333	37.1426		10.9833	1	0	0.733333	34.7966
11	2	0	0.734444	34.6598		11	2	0	0.734444	35.3636		11	2	1	0.734444	37.1457		11	1	0	0.734444	34.8019
11.0167	2	0	0.735556	34.6691		11.0167	2	2	0.735556	35.3826		11.0167	2	1	0.735556	37.1486		11.0167	1	0	0.735556	34.8007
11.0333	2	0	0.736667	34.6776		11.0333	2	4	0.736667	35.4061		11.0333	2	2	0.736667	37.1464		11.0333	1	0	0.736667	34.8004
11.05	2	0	0.737778	34.6843		11.05	1	0	0.737778	35.421		11.05	2	0	0.737778	37.1413		11.05	1	0	0.737778	34.808
11.0667	1	0	0.738889	34.6953		11.0667	1	0	0.738889	35.4403		11.0667	2	0	0.738889	37.1455		11.0667	1	0	0.738889	34.8195
11.0833	1	0	0.74	34.7074		11.0833	1	0	0.74	35.4592		11.0833	2	0	0.74	37.1486		11.0833	1	0	0.74	34.8442
11.1	1	0	0.741111	34.7186		11.1	1	0	0.741111	35.4803		11.1	2	0	0.741111	37.1474		11.1	1	0	0.741111	34.8795
11.1167	1	0	0.742222	34.735		11.1167	1	0	0.742222	35.4935		11.1167	2	0	0.742222	37.1432		11.1167	1	0	0.742222	34.9113
11.1333	1	0	0.743333	34.7369		11.1333	1	0	0.743333	35.5084		11.1333	2	0	0.743333	37.1302		11.1333	1	0	0.743333	34.9043
11.15	1	0	0.744444	34.7272		11.15	1	0	0.744444	35.5222		11.15	1	0	0.744444	37.1185		11.15	1	0	0.744444	34.8821
11.1667	1	0	0.745556	34.7266		11.1667	1	0	0.745556	35.5426		11.1667	1	0	0.745556	37.1033		11.1667	1	0	0.745556	34.8605
11.1833	1	0	0.746667	34.7368		11.1833	1	0	0.746667	35.5585		11.1833	1	0	0.746667	37.1003		11.1833	0	0	0.746667	34.846
11.2	1	0	0.747778	34.7395		11.2	1	0	0.747778	35.5644		11.2	1	0	0.747778	37.0973		11.2	0	0	0.747778	34.8274
11.2167	2	0	0.748889	34.7444		11.2167	1	0	0.748889	35.5773		11.2167	1	0	0.748889	37.1015		11.2167	2	1	0.748889	34.8179
11.2333	1	0	0.75	34.7422		11.2333	1	0	0.75	35.5871		11.2333	1	0	0.75	37.1075		11.2333	2	2	0.75	34.8118
11.25	0	0	0.751111	34.7434		11.25	2	0	0.751111	35.5999		11.25	1	0	0.751111	37.112		11.25	2	0	0.751111	34.816
11.2667	0	0	0.752222	34.7381		11.2667	2	0	0.752222	35.6142		11.2667	1	0	0.752222	37.1199		11.2667	2	0	0.752222	34.829
11.2833	2	0	0.753333	34.7248		11.2833	2	0	0.753333	35.6216		11.2833	1	0	0.753333	37.133		11.2833	2	0	0.753333	34.8326
11.3	2	0	0.754444	34.7195		11.3	2	0	0.754444	35.6265		11.3	1	0	0.754444	37.1453		11.3	2	0	0.754444	34.8335
11.3167	2	0	0.755556	34.7147		11.3167	2	0	0.755556	35.6396		11.3167	1	0	0.755556	37.1429		11.3167	2	3	0.755556	34.8357
11.3333	2	0	0.756667	34.7066		11.3333	2	0	0.756667	35.6535		11.3333	1	0	0.756667	37.1341		11.3333	2	0	0.756667	34.8433
11.35	2	0	0.757778	34.7078		11.35	2	0	0.757778	35.6638		11.35	1	0	0.757778	37.138		11.35	2	0	0.757778	34.8464
11.3667	2	0	0.758889	34.7169		11.3667	2	0	0.758889	35.6842		11.3667	1	0	0.758889	37.1378		11.3667	2	0	0.758889	34.8402
11.3833	2	3	0.76	34.7118		11.3833	2	1	0.76	35.699		11.3833	1	0	0.76	37.1448		11.3833	2	0	0.76	34.8381
11.4	2	1	0.761111	34.7084		11.4	2	0	0.761111	35.71		11.4	1	0	0.761111	37.1456		11.4	2	2	0.761111	34.8375
11.4167	2	0	0.762222	34.7006		11.4167	1	0	0.762222	35.7294		11.4167	1	0	0.762222	37.1309		11.4167	1	0	0.762222	34.8344
11.4333	2	0	0.763333	34.698		11.4333	1	0	0.763333	35.751		11.4333	1	0	0.763333	37.1198		11.4333	1	0	0.763333	34.8244
11.45	2	0	0.764444	34.7006		11.45	1	0	0.764444	35.7633		11.45	1	0	0.764444	37.1022		11.45	1	0	0.764444	34.8168
11.4667	1	0	0.765556	34.7077		11.4667	1	0	0.765556	35.7709		11.4667	1	0	0.765556	37.0825		11.4667	1	0	0.765556	34.8144
11.4833	1	0	0.766667	34.7128		11.4833	1	0	0.766667	35.7714		11.4833	1	0	0.766667	37.0744		11.4833	1	0	0.766667	34.8113
11.5	1	0	0.767778	34.7146		11.5	1	0	0.767778	35.7672		11.5	1	0	0.767778	37.0781		11.5	1	0	0.767778	34.7958
11.5167	1	0	0.768889	34.7172		11.5167	2	0	0.768889	35.7646		11.5167	1	0	0.768889	37.0887		11.5167	1	0	0.768889	34.786
11.5333	1	0	0.77	34.7173		11.5333	1	0	0.77	35.7701		11.5333	1	0	0.77	37.1002		11.5333	1	2	0.77	34.7839
11.55	1	0	0.771111	34.7209		11.55	1	0	0.771111	35.786		11.55	1	0	0.771111	37.1114		11.55	1	0	0.771111	34.7846
11.5667	0	0	0.772222	34.7136		11.5667	0	0	0.772222	35.7927		11.5667	0	0	0.772222	37.1229		11.5667	1	0	0.772222	34.7934
11.5833	1	0	0.773333	34.7044		11.5833	1	0	0.773333	35.8075		11.5833	1	0	0.773333	37.121		11.5833	1	0	0.773333	34.8064
11.6	1	0	0.774444	34.7007		11.6	1	0	0.774444	35.8188		11.6	2	0	0.774444	37.1173		11.6	1	0	0.774444	34.8165
11.6167	1	0	0.775556	34.7037		11.6167	1	0	0.775556	35.8229		11.6167	2	0	0.775556	37.1135		11.6167	1	0	0.775556	34.8426
11.6333	1	0	0.776667	34.7067		11.6333	1	0	0.776667	35.8233		11.6333	2	0	0.776667	37.1163		11.6333	1	0	0.776667	34.8802
11.65	1	0	0.777778	34.707		11.65	1	0	0.777778	35.8246		11.65	2	0	0.777778	37.1059		11.65	1	0	0.777778	34.8898
11.6667	1	0	0.778889	34.7119		11.6667	1	0	0.778889	35.824		11.6667	2	1	0.778889	37.0958		11.6667	2	0	0.778889	34.8709
11.6833	1	0	0.78	34.7316		11.6833	2	0	0.78	35.8213		11.6833	2	0	0.78	37.097		11.6833	2	0	0.78	34.8591
11.7	2	0	0.781111	34.7437		11.7	2	0	0.781111	35.8255		11.7	2	0	0.781111	37.1061		11.7	2	0	0.781111	34.8503
11.7167	2	0	0.782222	34.7599		11.7167	2	0	0.782222	35.8336		11.7167	2	0	0.782222	37.1101		11.7167	2	0	0.782222	34.8434
11.7333	2	0	0.783333	34.782		11.7333	2	0	0.783333	35.8381		11.7333	2	0	0.783333	37.1061		11.7333	2	0	0.783333	34.8307
11.75	2	0	0.784444	34.7974		11.75	2	0	0.784444	35.8343		11.75	2	0	0.784444	37.1014		11.75	2	0	0.784444	34.8122
11.7667	2	2	0.785556	34.8007		11.7667	2	0	0.785556	35.8359		11.7667	2	1	0.785556	37.0911		11.7667	2	1	0.785556	34.7994
11.7833	2	0	0.786667	34.8064		11.7833	2	1	0.786667	35.8444		11.7833	2	0	0.786667	37.0798		11.7833	2	0	0.786667	34.7895
11.8	1	0	0.787778	34.8262		11.8	2	1	0.787778	35.8509		11.8	2	0	0.787778	37.0706		11.8	2	0	0.787778	34.7846
11.8167	1	0	0.788889	34.8359		11.8167	2	0	0.788889	35.8591		11.8167	2	0	0.788889	37.0609		11.8167	2	0	0.788889	34.7849
11.8333	1	0	0.79	34.8501		11.8333	2	0	0.79	35.8644		11.8333	2	0	0.79	37.0471		11.8333	2	3	0.79	34.7896
11.85	1	0	0.791111	34.8336		11.85	2	0	0.791111	35.8759		11.85	2	0	0.791111	37.0422		11.85	2	2	0.791111	34.7894
11.8667	1	0	0.792222	34.8171		11.8667	2	0	0.792222	35.8794		11.8667	2	0	0.792222	37.0616		11.8667	2	1	0.792222	34.7951
11.8833	2	0	0.793333	34.8053		11.8833	1	0	0.793333	35.8865		11.8833	2	0	0.793333	37.0844		11.8833	2	0	0.793333	34.8012
11.9	2	0	0.794444	34.7926		11.9	1	0	0.794444	35.8977		11.9	2	0	0.794444	37.0928		11.9	2	1	0.794444	34.8056
11.9167	2	0	0.795556	34.7837		11.9167	1	0	0.795556	35.9025		11.9167	1	0	0.795556	37.1009		11.9167	2	0	0.795556	34.8076
11.9333	2	0	0.796667	34.7658		11.9333	1	0	0.796667	35.9009		11.9333	1	0	0.796667	37.1113		11.9333	2	0	0.796667	34.8102
11.95	2	0	0.797778	34.7444		11.95	1	0	0.797778	35.9029		11.95	1	0	0.797778	37.1276		11.95	2	3	0.797778	34.8206
11.9667	2	0	0.798889	34.7324		11.9667	1	0	0.798889	35.9081		11.9667	1	0	0.798889	37.1489		11.9667	2	2	0.798889	34.8267
11.9833	2	0	0.8	34.7319		11.9833	1	0	0.8	35.9126		11.9833	1	0	0.8	37.1497		11.9833	2	0	0.8	34.827
12	2	2	0.801111	34.7275		12	2	10	0.801111	35.9197		12	1	0	0.801111	37.1568		12	2	4	0.801111	34.8301
12.0167	2	9	0.802222	34.7256		12.0167	2	1	0.802222	35.9267		12.0167	2	5	0.802222	37.1692		12.0167	2	0	0.802222	34.8405
12.0333	2	5	0.803333	34.7267		12.0333	2	5	0.803333	35.9344		12.0333	2	0	0.803333	37.1703		12.0333	2	0	0.803333	34.8631
12.05	2	3	0.804444	34.7294		12.05	2	0	0.804444	35.9498		12.05	2	0	0.804444	37.145		12.05	2	7	0.804444	34.8963
12.0667	2	5	0.805556	34.7294		12.0667	2	4	0.805556	35.962		12.0667	2	3	0.805556	37.1093		12.0667	2	1	0.805556	34.9382
12.0833	2	0	0.806667	34.7271		12.0833	2	1	0.806667	35.9687		12.0833	2	3	0.806667	37.0938		12.0833	2	6	0.806667	34.9871
12.1	2	0	0.807778	34.7231		12.1	2	0	0.807778	35.9646		12.1	2	2	0.807778	37.093		12.1	2	3	0.807778	35.033
12.1167	2	3	0.808889	34.7216		12.1167	2	0	0.808889	35.9584		12.1167	2	0	0.808889	37.0941		12.1167	2	2	0.808889	35.0799
12.1333	2	0	0.81	34.7147		12.1333	2	0	0.81	35.9603		12.1333	2	2	0.81	37.1045		12.1333	2	0	0.81	35.1256
12.15	2	1	0.811111	34.7029		12.15	2	0	0.811111	35.9673		12.15	2	0	0.811111	37.0841		12.15	2	2	0.811111	35.1568
12.1667	2	3	0.812222	34.6944		12.1667	2	1	0.812222	35.9762		12.1667	2	8	0.812222	37.0537		12.1667	2	0	0.812222	35.1677
12.1833	2	5	0.813333	34.6937		12.1833	2	2	0.813333	35.9785		12.1833	2	0	0.813333	37.0329		12.1833	2	1	0.813333	35.1397
12.2	2	2	0.814444	34.695		12.2	2	2	0.814444	35.9746		12.2	2	0	0.814444	37.0209		12.2	2	1	0.814444	35.0987
12.2167	2	5	0.815556	34.6933		12.2167	2	3	0.815556	35.9762		12.2167	2	0	0.815556	37.0125		12.2167	2	6	0.815556	35.048
12.2333	2	2	0.816667	34.6929		12.2333	2	4	0.816667	35.9847		12.2333	2	4	0.816667	37.0045		12.2333	2	2	0.816667	35.0024
12.25	2	0	0.817778	34.6937		12.25	2	0	0.817778	35.9929		12.25	2	6	0.817778	37.0028		12.25	2	2	0.817778	34.9681
12.2667	2	1	0.818889	34.6984		12.2667	2	5	0.818889	35.9978		12.2667	2	4	0.818889	37.0108		12.2667	2	5	0.818889	34.9412
12.2833	2	5	0.82	34.6801		12.2833	2	2	0.82	36.004		12.2833	2	5	0.82	37.0287		12.2833	2	1	0.82	34.9156
12.3	2	0	0.821111	34.6615		12.3	2	0	0.821111	35.9913		12.3	2	0	0.821111	37.0395		12.3	2	0	0.821111	34.8907
12.3167	2	0	0.822222	34.6534		12.3167	2	1	0.822222	35.962		12.3167	2	0	0.822222	37.0518		12.3167	2	1	0.822222	34.8685
12.3333	2	7	0.823333	34.6553		12.3333	2	2	0.823333	35.9455		12.3333	2	0	0.823333	37.0529		12.3333	2	0	0.823333	34.8623
12.35	2	4	0.824444	34.6595		12.35	2	2	0.824444	35.9424		12.35	2	0	0.824444	37.037		12.35	2	0	0.824444	34.8655
12.3667	2	4	0.825556	34.6575		12.3667	2	0	0.825556	35.9568		12.3667	2	4	0.825556	37.0243		12.3667	2	3	0.825556	34.8729
12.3833	2	1	0.826667	34.6518		12.3833	2	0	0.826667	35.9746		12.3833	2	1	0.826667	37.0113		12.3833	2	4	0.826667	34.884
12.4	2	4	0.827778	34.6561		12.4	2	0	0.827778	35.9899		12.4	2	2	0.827778	37.0028		12.4	2	3	0.827778	34.8889
12.4167	2	0	0.828889	34.6592		12.4167	2	1	0.828889	35.9973		12.4167	2	3	0.828889	37.0019		12.4167	2	3	0.828889	34.8959
12.4333	2	0	0.83	34.663		12.4333	2	4	0.83	36.0002		12.4333	2	8	0.83	37.0003		12.4333	2	5	0.83	34.9101
12.45	2	0	0.831111	34.6694		12.45	2	2	0.831111	36.0025		12.45	2	7	0.831111	36.9903		12.45	2	5	0.831111	34.9339
12.4667	2	0	0.832222	34.6703		12.4667	2	0	0.832222	35.9993		12.4667	2	3	0.832222	36.9826		12.4667	2	2	0.832222	34.9501
12.4833	2	0	0.833333	34.6655		12.4833	2	1	0.833333	36.0024		12.4833	2	0	0.833333	36.9806		12.4833	2	0	0.833333	34.9695
12.5	2	0	0.834444	34.6609		12.5	2	2	0.834444	35.9984		12.5	2	3	0.834444	36.9876		12.5	2	10	0.834444	35.0285
12.5167	2	0	0.835556	34.6605		12.5167	2	4	0.835556	36.0094		12.5167	2	0	0.835556	37.0011		12.5167	2	4	0.835556	35.086
12.5333	2	0	0.836667	34.6581		12.5333	2	2	0.836667	35.9914		12.5333	2	0	0.836667	37.013		12.5333	2	2	0.836667	35.1369
12.55	2	3	0.837778	34.658		12.55	2	2	0.837778	35.9739		12.55	2	1	0.837778	37.0166		12.55	2	7	0.837778	35.1802
12.5667	2	5	0.838889	34.6566		12.5667	2	6	0.838889	35.9756		12.5667	2	4	0.838889	37.0277		12.5667	2	2	0.838889	35.2134
12.5833	2	1	0.84	34.6551		12.5833	2	5	0.84	35.9657		12.5833	2	5	0.84	37.0412		12.5833	2	6	0.84	35.2439
12.6	2	7	0.841111	34.6503		12.6	2	4	0.841111	35.9608		12.6	2	4	0.841111	37.0539		12.6	2	6	0.841111	35.2721
12.6167	2	0	0.842222	34.642		12.6167	2	0	0.842222	35.9627		12.6167	2	0	0.842222	37.0634		12.6167	2	5	0.842222	35.2936
12.6333	2	0	0.843333	34.6381		12.6333	2	3	0.843333	35.9572		12.6333	2	3	0.843333	37.072		12.6333	2	6	0.843333	35.308
12.65	2	0	0.844444	34.641		12.65	2	0	0.844444	35.9528		12.65	2	1	0.844444	37.0745		12.65	2	4	0.844444	35.3202
12.6667	2	0	0.845556	34.6439		12.6667	2	3	0.845556	35.953		12.6667	2	4	0.845556	37.0779		12.6667	2	0	0.845556	35.3297
12.6833	2	0	0.846667	34.6474		12.6833	2	3	0.846667	35.9453		12.6833	2	2	0.846667	37.0724		12.6833	2	2	0.846667	35.3334
12.7	2	1	0.847778	34.6359		12.7	2	0	0.847778	35.9389		12.7	2	0	0.847778	37.0727		12.7	2	3	0.847778	35.3227
12.7167	2	2	0.848889	34.6216		12.7167	2	3	0.848889	35.9333		12.7167	2	3	0.848889	37.0736		12.7167	2	10	0.848889	35.2841
12.7333	2	5	0.85	34.613		12.7333	2	0	0.85	35.9263		12.7333	2	2	0.85	37.0725		12.7333	2	6	0.85	35.2333
12.75	2	0	0.851111	34.6085		12.75	2	3	0.851111	35.9243		12.75	2	6	0.851111	37.0703		12.75	2	0	0.851111	35.1771
12.7667	2	0	0.852222	34.6115		12.7667	2	4	0.852222	35.9257		12.7667	2	7	0.852222	37.0602		12.7667	2	2	0.852222	35.1274
12.7833	2	0	0.853333	34.6195		12.7833	2	0	0.853333	35.9438		12.7833	2	3	0.853333	37.0484		12.7833	2	7	0.853333	35.0859
12.8	2	0	0.854444	34.6312		12.8	2	0	0.854444	35.9698		12.8	2	3	0.854444	37.0352		12.8	2	2	0.854444	35.0555
12.8167	2	6	0.855556	34.6396		12.8167	2	1	0.855556	35.9872		12.8167	2	5	0.855556	37.0199		12.8167	2	3	0.855556	35.0288
12.8333	2	0	0.856667	34.6449		12.8333	2	0	0.856667	35.9848		12.8333	2	1	0.856667	37.0188		12.8333	2	6	0.856667	35.0021
12.85	2	2	0.857778	34.6492		12.85	2	4	0.857778	35.9885		12.85	2	2	0.857778	37.0198		12.85	2	4	0.857778	34.9861
12.8667	2	0	0.858889	34.6589		12.8667	2	0	0.858889	35.989		12.8667	2	4	0.858889	37.0185		12.8667	2	1	0.858889	34.9713
12.8833	2	4	0.86	34.672		12.8833	2	4	0.86	35.9872		12.8833	2	1	0.86	37.02		12.8833	2	1	0.86	34.966
12.9	2	4	0.861111	34.6887		12.9	2	4	0.861111	35.9731		12.9	2	0	0.861111	37.0071		12.9	2	0	0.861111	34.971
12.9167	1	0	0.862222	34.7096		12.9167	2	1	0.862222	35.9552		12.9167	1	0	0.862222	36.989		12.9167	2	3	0.862222	34.9677
12.9333	2	0	0.863333	34.7499		12.9333	2	2	0.863333	35.9374		12.9333	1	0	0.863333	36.9705		12.9333	2	5	0.863333	34.9717
12.95	2	3	0.864444	34.775		12.95	2	3	0.864444	35.9261		12.95	1	0	0.864444	36.9552		12.95	2	3	0.864444	34.9771
12.9667	2	0	0.865556	34.7546		12.9667	2	3	0.865556	35.9154		12.9667	1	0	0.865556	36.9481		12.9667	2	0	0.865556	34.9782
12.9833	2	0	0.866667	34.7355		12.9833	2	0	0.866667	35.9083		12.9833	1	0	0.866667	36.9456		12.9833	2	0	0.866667	34.9748
13	2	0	0.867778	34.7278		13	2	0	0.867778	35.8977		13	1	0	0.867778	36.9347		13	2	0	0.867778	34.9647
13.0167	2	0	0.868889	34.7209		13.0167	2	3	0.868889	35.8839		13.0167	1	0	0.868889	36.9419		13.0167	2	0	0.868889	34.962
13.0333	2	0	0.87	34.7202		13.0333	2	0	0.87	35.8797		13.0333	1	0	0.87	36.9447		13.0333	2	1	0.87	34.9504
13.05	2	0	0.871111	34.7233		13.05	2	3	0.871111	35.888		13.05	1	0	0.871111	36.9397		13.05	2	3	0.871111	34.9453
13.0667	2	3	0.872222	34.723		13.0667	2	0	0.872222	35.8978		13.0667	1	0	0.872222	36.9314		13.0667	2	5	0.872222	34.9438
13.0833	2	8	0.873333	34.7251		13.0833	2	4	0.873333	35.909		13.0833	1	0	0.873333	36.9236		13.0833	2	4	0.873333	34.9452
13.1	2	1	0.874444	34.7235		13.1	2	1	0.874444	35.9282		13.1	0	0	0.874444	36.9205		13.1	2	4	0.874444	34.94
13.1167	2	0	0.875556	34.7288		13.1167	2	0	0.875556	35.9379		13.1167	2	4	0.875556	36.9233		13.1167	2	2	0.875556	34.9293
13.1333	2	7	0.876667	34.7367		13.1333	2	0	0.876667	35.9476		13.1333	2	0	0.876667	36.9329		13.1333	2	4	0.876667	34.9213
13.15	2	3	0.877778	34.7458		13.15	1	0	0.877778	35.9542		13.15	2	0	0.877778	36.9415		13.15	2	3	0.877778	34.9193
13.1667	2	5	0.878889	34.7564		13.1667	2	0	0.878889	35.9534		13.1667	2	0	0.878889	36.9364		13.1667	2	10	0.878889	34.9177
13.1833	2	5	0.88	34.768		13.1833	2	0	0.88	35.9537		13.1833	2	2	0.88	36.9254		13.1833	2	0	0.88	34.9209
13.2	2	0	0.881111	34.7851		13.2	2	0	0.881111	35.9524		13.2	2	2	0.881111	36.9211		13.2	2	1	0.881111	34.9212
13.2167	2	0	0.882222	34.8121		13.2167	2	0	0.882222	35.9609		13.2167	2	4	0.882222	36.9132		13.2167	2	6	0.882222	34.9189
13.2333	2	0	0.883333	34.8587		13.2333	2	0	0.883333	35.9634		13.2333	2	3	0.883333	36.9149		13.2333	2	4	0.883333	34.9094
13.25	2	0	0.884444	34.91		13.25	1	0	0.884444	35.9657		13.25	2	0	0.884444	36.9198		13.25	2	10	0.884444	34.9025
13.2667	2	0	0.885556	34.9693		13.2667	1	0	0.885556	35.9715		13.2667	2	0	0.885556	36.9254		13.2667	2	0	0.885556	34.8969
13.2833	2	0	0.886667	35.027		13.2833	1	0	0.886667	35.9679		13.2833	2	0	0.886667	36.9352		13.2833	2	5	0.886667	34.8977
13.3	2	0	0.887778	35.0796		13.3	1	0	0.887778	35.966		13.3	2	0	0.887778	36.9502		13.3	2	10	0.887778	34.9046
13.3167	2	3	0.888889	35.1072		13.3167	1	0	0.888889	35.9696		13.3167	2	2	0.888889	36.9585		13.3167	2	0	0.888889	34.9065
13.3333	2	0	0.89	35.0841		13.3333	1	0	0.89	35.9735		13.3333	2	2	0.89	36.9497		13.3333	2	0	0.89	34.9018
13.35	1	0	0.891111	35.053		13.35	1	0	0.891111	35.98		13.35	2	2	0.891111	36.9452		13.35	2	2	0.891111	34.8928
13.3667	1	0	0.892222	35.015		13.3667	1	0	0.892222	35.9842		13.3667	2	0	0.892222	36.9664		13.3667	2	2	0.892222	34.8706
13.3833	1	0	0.893333	34.9774		13.3833	1	0	0.893333	35.9884		13.3833	2	0	0.893333	36.9808		13.3833	2	2	0.893333	34.8556
13.4	1	0	0.894444	34.949		13.4	2	0	0.894444	35.9777		13.4	1	0	0.894444	36.9725		13.4	2	3	0.894444	34.8539
13.4167	1	0	0.895556	34.9304		13.4167	2	0	0.895556	35.9712		13.4167	1	0	0.895556	36.9699		13.4167	2	0	0.895556	34.859
13.4333	1	0	0.896667	34.9167		13.4333	2	0	0.896667	35.9646		13.4333	1	0	0.896667	36.9839		13.4333	2	0	0.896667	34.8622
13.45	1	0	0.897778	34.9033		13.45	2	0	0.897778	35.9638		13.45	1	0	0.897778	37.0037		13.45	2	0	0.897778	34.8575
13.4667	1	0	0.898889	34.8973		13.4667	2	0	0.898889	35.9618		13.4667	1	0	0.898889	37.0146		13.4667	2	8	0.898889	34.8605
13.4833	1	0	0.9	34.8989		13.4833	2	5	0.9	35.9665		13.4833	1	0	0.9	37.033		13.4833	2	0	0.9	34.8629
13.5	1	0	0.901111	34.8996		13.5	2	2	0.901111	35.9629		13.5	1	2	0.901111	37.0421		13.5	2	0	0.901111	34.8428
13.5167	1	0	0.902222	34.8949		13.5167	2	5	0.902222	35.956		13.5167	2	1	0.902222	37.0343		13.5167	1	0	0.902222	34.8391
13.5333	1	0	0.903333	34.892		13.5333	2	4	0.903333	35.9526		13.5333	2	0	0.903333	37.0172		13.5333	1	0	0.903333	34.85
13.55	1	0	0.904444	34.8955		13.55	2	3	0.904444	35.942		13.55	2	0	0.904444	37.0035		13.55	2	1	0.904444	34.8618
13.5667	1	0	0.905556	34.9009		13.5667	2	1	0.905556	35.9369		13.5667	2	0	0.905556	36.9986		13.5667	2	0	0.905556	34.8685
13.5833	1	0	0.906667	34.9033		13.5833	2	0	0.906667	35.9428		13.5833	2	4	0.906667	36.9932		13.5833	2	0	0.906667	34.8726
13.6	1	0	0.907778	34.9055		13.6	2	0	0.907778	35.9462		13.6	2	5	0.907778	36.9898		13.6	2	0	0.907778	34.8767
13.6167	2	0	0.908889	34.911		13.6167	2	0	0.908889	35.9496		13.6167	2	1	0.908889	37.005		13.6167	2	0	0.908889	34.877
13.6333	2	0	0.91	34.9194		13.6333	2	2	0.91	35.9547		13.6333	2	4	0.91	37.0336		13.6333	2	0	0.91	34.8647
13.65	2	0	0.911111	34.9218		13.65	2	1	0.911111	35.956		13.65	2	5	0.911111	37.0521		13.65	2	0	0.911111	34.8559
13.6667	2	0	0.912222	34.9224		13.6667	1	0	0.912222	35.9674		13.6667	2	6	0.912222	37.0705		13.6667	2	7	0.912222	34.8544
13.6833	2	0	0.913333	34.9284		13.6833	1	0	0.913333	35.9747		13.6833	2	1	0.913333	37.0998		13.6833	2	0	0.913333	34.8562
13.7	2	0	0.914444	34.9306		13.7	1	0	0.914444	35.9621		13.7	2	2	0.914444	37.1318		13.7	2	5	0.914444	34.855
13.7167	2	0	0.915556	34.9368		13.7167	1	0	0.915556	35.9605		13.7167	2	6	0.915556	37.1553		13.7167	2	6	0.915556	34.8523
13.7333	2	0	0.916667	34.9456		13.7333	1	0	0.916667	35.948		13.7333	2	3	0.916667	37.1626		13.7333	2	3	0.916667	34.8542
13.75	1	0	0.917778	34.9614		13.75	1	0	0.917778	35.9385		13.75	2	0	0.917778	37.1646		13.75	2	6	0.917778	34.8638
13.7667	1	0	0.918889	34.9947		13.7667	1	0	0.918889	35.9143		13.7667	2	0	0.918889	37.1618		13.7667	2	7	0.918889	34.8653
13.7833	1	0	0.92	35.0414		13.7833	1	0	0.92	35.9098		13.7833	2	0	0.92	37.1605		13.7833	2	9	0.92	34.854
13.8	1	0	0.921111	35.0995		13.8	1	0	0.921111	35.9233		13.8	2	2	0.921111	37.1668		13.8	2	2	0.921111	34.8504
13.8167	1	0	0.922222	35.1601		13.8167	1	0	0.922222	35.9407		13.8167	2	3	0.922222	37.163		13.8167	2	0	0.922222	34.8499
13.8333	1	0	0.923333	35.2203		13.8333	1	0	0.923333	35.9683		13.8333	2	4	0.923333	37.1677		13.8333	1	0	0.923333	34.8585
13.85	1	0	0.924444	35.2762		13.85	1	0	0.924444	35.9951		13.85	2	2	0.924444	37.1811		13.85	1	0	0.924444	34.8684
13.8667	1	0	0.925556	35.3233		13.8667	1	0	0.925556	36.0135		13.8667	2	2	0.925556	37.1766		13.8667	1	0	0.925556	34.8794
13.8833	0	0	0.926667	35.3673		13.8833	1	0	0.926667	36.0291		13.8833	2	4	0.926667	37.1576		13.8833	1	0	0.926667	34.8878
13.9	0	0	0.927778	35.3955		13.9	1	0	0.927778	36.0258		13.9	2	1	0.927778	37.1445		13.9	1	0	0.927778	34.8969
13.9167	2	0	0.928889	35.4138		13.9167	2	1	0.928889	36.0187		13.9167	2	2	0.928889	37.1331		13.9167	1	0	0.928889	34.8999
13.9333	2	0	0.93	35.4389		13.9333	2	0	0.93	36.0056		13.9333	2	0	0.93	37.1233		13.9333	1	0	0.93	34.8973
13.95	2	0	0.931111	35.4665		13.95	2	0	0.931111	35.9912		13.95	2	1	0.931111	37.1249		13.95	1	0	0.931111	34.9023
13.9667	2	0	0.932222	35.463		13.9667	2	1	0.932222	35.9909		13.9667	2	0	0.932222	37.1282		13.9667	1	0	0.932222	34.9182
13.9833	2	2	0.933333	35.4454		13.9833	2	0	0.933333	36.0039		13.9833	2	1	0.933333	37.1262		13.9833	0	0	0.933333	34.9379
14	2	3	0.934444	35.4075		14	2	6	0.934444	36.0027		14	2	1	0.934444	37.1142		14	2	0	0.934444	34.9766
14.0167	2	1	0.935556	35.3593		14.0167	2	2	0.935556	36.0091		14.0167	2	3	0.935556	37.1232		14.0167	2	0	0.935556	34.9799
14.0333	2	0	0.936667	35.3102		14.0333	2	6	0.936667	36.0086		14.0333	2	5	0.936667	37.1561		14.0333	2	0	0.936667	34.9623
14.05	2	0	0.937778	35.2644		14.05	2	3	0.937778	35.9886		14.05	2	0	0.937778	37.1742		14.05	2	0	0.937778	34.9475
14.0667	2	0	0.938889	35.2363		14.0667	2	2	0.938889	35.9667		14.0667	2	0	0.938889	37.171		14.0667	2	3	0.938889	34.9363
14.0833	2	0	0.94	35.2189		14.0833	2	0	0.94	35.9401		14.0833	2	0	0.94	37.161		14.0833	2	5	0.94	34.9296
14.1	2	0	0.941111	35.2011		14.1	2	0	0.941111	35.913		14.1	2	0	0.941111	37.1537		14.1	2	5	0.941111	34.9288
14.1167	2	0	0.942222	35.1902		14.1167	2	2	0.942222	35.9066		14.1167	2	0	0.942222	37.1424		14.1167	2	5	0.942222	34.9295
14.1333	2	0	0.943333	35.187		14.1333	2	6	0.943333	35.9126		14.1333	2	4	0.943333	37.1326		14.1333	2	0	0.943333	34.9243
14.15	1	0	0.944444	35.1922		14.15	2	3	0.944444	35.9189		14.15	1	0	0.944444	37.1327		14.15	2	1	0.944444	34.9263
14.1667	1	0	0.945556	35.1974		14.1667	2	11	0.945556	35.9381		14.1667	1	0	0.945556	37.1297		14.1667	2	6	0.945556	34.9252
14.1833	1	0	0.946667	35.1958		14.1833	2	4	0.946667	35.9768		14.1833	1	0	0.946667	37.1232		14.1833	2	4	0.946667	34.9247
14.2	1	0	0.947778	35.1926		14.2	2	1	0.947778	36.0121		14.2	1	0	0.947778	37.1219		14.2	2	3	0.947778	34.928
14.2167	1	0	0.948889	35.1884		14.2167	2	0	0.948889	36.0291		14.2167	1	0	0.948889	37.1248		14.2167	2	1	0.948889	34.9254
14.2333	1	0	0.95	35.1825		14.2333	2	0	0.95	36.0399		14.2333	1	0	0.95	37.1276		14.2333	2	0	0.95	34.9186
14.25	1	0	0.951111	35.1776		14.25	2	0	0.951111	36.0542		14.25	1	0	0.951111	37.1246		14.25	2	0	0.951111	34.9189
14.2667	1	0	0.952222	35.1782		14.2667	2	0	0.952222	36.0591		14.2667	1	0	0.952222	37.1066		14.2667	2	0	0.952222	34.9136
14.2833	1	0	0.953333	35.1797		14.2833	2	1	0.953333	36.0759		14.2833	1	0	0.953333	37.1028		14.2833	2	0	0.953333	34.9033
14.3	1	0	0.954444	35.1837		14.3	2	1	0.954444	36.0897		14.3	1	0	0.954444	37.1101		14.3	2	0	0.954444	34.8941
14.3167	1	0	0.955556	35.1733		14.3167	2	0	0.955556	36.0976		14.3167	1	0	0.955556	37.0973		14.3167	2	1	0.955556	34.8896
14.3333	1	0	0.956667	35.1617		14.3333	2	0	0.956667	36.1074		14.3333	1	0	0.956667	37.0938		14.3333	2	1	0.956667	34.8879
14.35	1	0	0.957778	35.1508		14.35	2	0	0.957778	36.1189		14.35	1	0	0.957778	37.1002		14.35	2	0	0.957778	34.8895
14.3667	1	0	0.958889	35.1495		14.3667	2	0	0.958889	36.1289		14.3667	0	0	0.958889	37.1007		14.3667	2	0	0.958889	34.8925
14.3833	1	0	0.96	35.1516		14.3833	2	2	0.96	36.1373		14.3833	1	0	0.96	37.0926		14.3833	2	0	0.96	34.8871
14.4	1	0	0.961111	35.1587		14.4	2	7	0.961111	36.1501		14.4	1	0	0.961111	37.0875		14.4	2	0	0.961111	34.8806
14.4167	1	0	0.962222	35.1637		14.4167	2	3	0.962222	36.1576		14.4167	1	0	0.962222	37.0854		14.4167	2	0	0.962222	34.8589
14.4333	0	0	0.963333	35.1509		14.4333	2	0	0.963333	36.1658		14.4333	1	0	0.963333	37.0851		14.4333	2	0	0.963333	34.8449
14.45	1	0	0.964444	35.1261		14.45	1	0	0.964444	36.1807		14.45	1	0	0.964444	37.0778		14.45	2	0	0.964444	34.8305
14.4667	1	0	0.965556	35.113		14.4667	1	0	0.965556	36.1994		14.4667	1	0	0.965556	37.0652		14.4667	2	0	0.965556	34.8194
14.4833	1	0	0.966667	35.1059		14.4833	1	0	0.966667	36.2107		14.4833	1	0	0.966667	37.07		14.4833	2	0	0.966667	34.8088
14.5	1	0	0.967778	35.0994		14.5	1	0	0.967778	36.216		14.5	1	0	0.967778	37.0723		14.5	2	0	0.967778	34.8104
14.5167	2	0	0.968889	35.0937		14.5167	1	0	0.968889	36.2195		14.5167	2	2	0.968889	37.0627		14.5167	2	1	0.968889	34.8092
14.5333	2	0	0.97	35.0932		14.5333	1	0	0.97	36.2163		14.5333	2	5	0.97	37.064		14.5333	2	0	0.97	34.8203
14.55	2	0	0.971111	35.0943		14.55	1	0	0.971111	36.1935		14.55	2	1	0.971111	37.0487		14.55	2	0	0.971111	34.8208
14.5667	2	0	0.972222	35.0939		14.5667	1	0	0.972222	36.184		14.5667	2	0	0.972222	37.0385		14.5667	1	0	0.972222	34.8129
14.5833	2	0	0.973333	35.095		14.5833	1	0	0.973333	36.1819		14.5833	2	6	0.973333	37.0385		14.5833	1	0	0.973333	34.8094
14.6	2	0	0.974444	35.0891		14.6	1	0	0.974444	36.1781		14.6	2	2	0.974444	37.0294		14.6	1	0	0.974444	34.8279
14.6167	2	0	0.975556	35.0824		14.6167	1	0	0.975556	36.1835		14.6167	2	1	0.975556	37.0312		14.6167	1	0	0.975556	34.8468
14.6333	2	2	0.976667	35.0778		14.6333	1	1	0.976667	36.1961		14.6333	2	4	0.976667	37.031		14.6333	1	0	0.976667	34.8763
14.65	2	8	0.977778	35.0743		14.65	2	0	0.977778	36.2021		14.65	2	4	0.977778	37.0253		14.65	1	0	0.977778	34.8828
14.6667	2	3	0.978889	35.0735		14.6667	2	0	0.978889	36.2069		14.6667	2	5	0.978889	37.0299		14.6667	1	0	0.978889	34.8748
14.6833	2	3	0.98	35.0817		14.6833	2	0	0.98	36.2173		14.6833	1	1	0.98	37.0392		14.6833	1	0	0.98	34.8875
14.7	2	0	0.981111	35.0873		14.7	2	1	0.981111	36.2239		14.7	2	0	0.981111	37.0335		14.7	1	0	0.981111	34.9012
14.7167	2	0	0.982222	35.0886		14.7167	2	3	0.982222	36.2356		14.7167	2	2	0.982222	37.0218		14.7167	1	0	0.982222	34.8997
14.7333	2	2	0.983333	35.0901		14.7333	2	4	0.983333	36.2366		14.7333	2	0	0.983333	37.0127		14.7333	0	0	0.983333	34.9064
14.75	2	0	0.984444	35.0956		14.75	2	0	0.984444	36.2248		14.75	1	0	0.984444	37.0107		14.75	1	0	0.984444	34.9162
14.7667	2	0	0.985556	35.0997		14.7667	2	1	0.985556	36.1928		14.7667	1	0	0.985556	37.0118		14.7667	1	0	0.985556	34.9155
14.7833	2	0	0.986667	35.0966		14.7833	2	7	0.986667	36.1489		14.7833	1	0	0.986667	37.0098		14.7833	1	0	0.986667	34.9243
14.8	2	0	0.987778	35.0845		14.8	2	0	0.987778	36.1072		14.8	1	0	0.987778	37.0141		14.8	1	0	0.987778	34.94
14.8167	2	0	0.988889	35.0561		14.8167	2	3	0.988889	36.0731		14.8167	1	0	0.988889	37.0244		14.8167	1	0	0.988889	34.9539
14.8333	2	0	0.99	35.0356		14.8333	2	2	0.99	36.0439		14.8333	1	0	0.99	37.025		14.8333	1	0	0.99	34.9753
14.85	2	0	0.991111	35.0171		14.85	2	2	0.991111	36.017		14.85	1	0	0.991111	37.0252		14.85	1	0	0.991111	34.9927
14.8667	2	0	0.992222	35.0127		14.8667	2	0	0.992222	35.9954		14.8667	1	0	0.992222	37.026		14.8667	1	0	0.992222	35.0071
14.8833	2	0	0.993333	35.0177		14.8833	2	0	0.993333	35.983		14.8833	1	0	0.993333	37.0319		14.8833	1	0	0.993333	35.0215
14.9	2	0	0.994444	35.0278		14.9	2	3	0.994444	35.9702		14.9	1	0	0.994444	37.0425		14.9	1	0	0.994444	35.0346
14.9167	2	2	0.995556	35.0335		14.9167	2	0	0.995556	35.9609		14.9167	1	0	0.995556	37.0461		14.9167	1	0	0.995556	35.0461
14.9333	2	5	0.996667	35.0373		14.9333	2	4	0.996667	35.9404		14.9333	1	0	0.996667	37.04		14.9333	0	0	0.996667	35.0462
14.95	2	0	0.997778	35.0356		14.95	2	0	0.997778	35.9278		14.95	0	0	0.997778	37.035		14.95	0	0	0.997778	35.0512
14.9667	2	0	0.998889	35.0323		14.9667	2	2	0.998889	35.9237		14.9667	0	2	0.998889	37.0177		14.9667	1	0	0.998889	35.0565
14.9833	2	0	1	35.0297		14.9833	2	2	1	35.9199		14.9833	2	2	1	37.0086		14.9833	2	0	1	35.0471
15	2	0	1.00111	35.0315		15	2	4	1.00111	35.9157		15	2	0	1.00111	37.0029		15	2	0	1.00111	35.0337
15.0167	2	0	1.00222	35.0313		15.0167	2	9	1.00222	35.9098		15.0167	2	0	1.00222	37.0073		15.0167	2	0	1.00222	35.0201
15.0333	2	0	1.00333	35.0256		15.0333	2	0	1.00333	35.9036		15.0333	2	0	1.00333	37.0169		15.0333	2	0	1.00333	35.0102
15.05	2	0	1.00444	35.0282		15.05	2	0	1.00444	35.8923		15.05	2	0	1.00444	37.0315		15.05	2	0	1.00444	34.9976
15.0667	2	0	1.00556	35.0382		15.0667	2	0	1.00556	35.8719		15.0667	2	4	1.00556	37.0404		15.0667	2	0	1.00556	35.0043
15.0833	1	0	1.00667	35.0587		15.0833	2	1	1.00667	35.8583		15.0833	2	5	1.00667	37.0497		15.0833	2	2	1.00667	35.0202
15.1	1	0	1.00778	35.0954		15.1	2	3	1.00778	35.8507		15.1	2	0	1.00778	37.0511		15.1	2	0	1.00778	35.026
15.1167	1	0	1.00889	35.1358		15.1167	2	4	1.00889	35.8479		15.1167	2	0	1.00889	37.041		15.1167	2	3	1.00889	35.0316
15.1333	1	0	1.01	35.1857		15.1333	2	0	1.01	35.845		15.1333	2	0	1.01	37.033		15.1333	2	0	1.01	35.0393
15.15	1	0	1.01111	35.2282		15.15	2	2	1.01111	35.8379		15.15	2	0	1.01111	37.0321		15.15	2	0	1.01111	35.0667
15.1667	1	0	1.01222	35.226		15.1667	2	3	1.01222	35.8328		15.1667	2	1	1.01222	37.0365		15.1667	2	1	1.01222	35.0994
15.1833	1	0	1.01333	35.1953		15.1833	2	1	1.01333	35.8312		15.1833	2	0	1.01333	37.0416		15.1833	2	1	1.01333	35.1368
15.2	1	0	1.01444	35.161		15.2	2	2	1.01444	35.8312		15.2	2	0	1.01444	37.0384		15.2	2	1	1.01444	35.1767
15.2167	1	0	1.01556	35.1245		15.2167	2	2	1.01556	35.822		15.2167	2	0	1.01556	37.0393		15.2167	1	0	1.01556	35.1965
15.2333	1	0	1.01667	35.0899		15.2333	2	1	1.01667	35.8074		15.2333	2	0	1.01667	37.0391		15.2333	1	0	1.01667	35.2162
15.25	0	0	1.01778	35.0662		15.25	2	6	1.01778	35.796		15.25	2	1	1.01778	37.0478		15.25	1	0	1.01778	35.2358
15.2667	1	0	1.01889	35.0507		15.2667	2	5	1.01889	35.7813		15.2667	2	3	1.01889	37.0536		15.2667	1	0	1.01889	35.2507
15.2833	1	0	1.02	35.0476		15.2833	2	3	1.02	35.7625		15.2833	1	0	1.02	37.048		15.2833	1	0	1.02	35.2628
15.3	1	0	1.02111	35.0498		15.3	2	0	1.02111	35.7513		15.3	1	0	1.02111	37.0337		15.3	1	1	1.02111	35.2721
15.3167	1	0	1.02222	35.0471		15.3167	2	2	1.02222	35.7464		15.3167	1	0	1.02222	37.0233		15.3167	1	0	1.02222	35.2801
15.3333	1	0	1.02333	35.0416		15.3333	2	3	1.02333	35.7459		15.3333	1	0	1.02333	37.0257		15.3333	1	0	1.02333	35.2913
15.35	1	0	1.02444	35.0382		15.35	2	7	1.02444	35.7405		15.35	1	0	1.02444	37.0279		15.35	1	0	1.02444	35.2952
15.3667	1	0	1.02556	35.0328		15.3667	2	3	1.02556	35.7352		15.3667	1	0	1.02556	37.0326		15.3667	1	0	1.02556	35.3081
15.3833	1	0	1.02667	35.0254		15.3833	2	0	1.02667	35.7319		15.3833	1	0	1.02667	37.0441		15.3833	1	0	1.02667	35.3229
15.4	2	0	1.02778	35.0158		15.4	2	1	1.02778	35.7324		15.4	1	0	1.02778	37.0522		15.4	1	0	1.02778	35.3398
15.4167	2	0	1.02889	34.9878		15.4167	2	1	1.02889	35.7344		15.4167	1	0	1.02889	37.0696		15.4167	1	0	1.02889	35.3558
15.4333	2	0	1.03	34.9659		15.4333	2	0	1.03	35.7315		15.4333	1	0	1.03	37.0863		15.4333	1	0	1.03	35.3713
15.45	2	0	1.03111	34.9494		15.45	2	2	1.03111	35.7024		15.45	1	0	1.03111	37.0835		15.45	1	0	1.03111	35.3849
15.4667	2	0	1.03222	34.937		15.4667	2	2	1.03222	35.6682		15.4667	1	0	1.03222	37.0906		15.4667	1	0	1.03222	35.4029
15.4833	2	0	1.03333	34.933		15.4833	2	4	1.03333	35.6473		15.4833	1	0	1.03333	37.0947		15.4833	1	0	1.03333	35.4186
15.5	1	0	1.03444	34.9326		15.5	2	5	1.03444	35.6272		15.5	1	0	1.03444	37.1041		15.5	1	0	1.03444	35.4359
15.5167	1	0	1.03556	34.9285		15.5167	2	1	1.03556	35.6181		15.5167	1	0	1.03556	37.1194		15.5167	1	0	1.03556	35.4509
15.5333	1	0	1.03667	34.9251		15.5333	2	0	1.03667	35.616		15.5333	1	0	1.03667	37.1136		15.5333	2	2	1.03667	35.4623
15.55	1	0	1.03778	34.9117		15.55	2	2	1.03778	35.6108		15.55	1	0	1.03778	37.1165		15.55	2	4	1.03778	35.4791
15.5667	1	0	1.03889	34.8979		15.5667	2	2	1.03889	35.6016		15.5667	1	0	1.03889	37.1121		15.5667	2	0	1.03889	35.4971
15.5833	1	0	1.04	34.8778		15.5833	2	2	1.04	35.5951		15.5833	1	0	1.04	37.1011		15.5833	2	1	1.04	35.5143
15.6	1	0	1.04111	34.8628		15.6	2	2	1.04111	35.5896		15.6	0	0	1.04111	37.0865		15.6	2	7	1.04111	35.5225
15.6167	1	0	1.04222	34.8554		15.6167	2	3	1.04222	35.5802		15.6167	1	0	1.04222	37.0782		15.6167	2	3	1.04222	35.5297
15.6333	1	0	1.04333	34.8567		15.6333	2	2	1.04333	35.5733		15.6333	1	0	1.04333	37.0892		15.6333	2	10	1.04333	35.5351
15.65	1	0	1.04444	34.8575		15.65	2	0	1.04444	35.5676		15.65	1	0	1.04444	37.1075		15.65	2	7	1.04444	35.5416
15.6667	1	0	1.04556	34.8606		15.6667	2	0	1.04556	35.551		15.6667	1	0	1.04556	37.1201		15.6667	2	1	1.04556	35.5616
15.6833	1	0	1.04667	34.8618		15.6833	2	0	1.04667	35.5193		15.6833	1	0	1.04667	37.1131		15.6833	2	3	1.04667	35.5742
15.7	1	0	1.04778	34.8771		15.7	2	0	1.04778	35.5036		15.7	1	0	1.04778	37.0939		15.7	2	5	1.04778	35.5828
15.7167	0	0	1.04889	34.9047		15.7167	2	0	1.04889	35.4941		15.7167	1	0	1.04889	37.0759		15.7167	2	3	1.04889	35.6018
15.7333	0	0	1.05	34.9484		15.7333	2	2	1.05	35.4742		15.7333	1	0	1.05	37.0685		15.7333	2	6	1.05	35.6166
15.75	2	0	1.05111	34.988		15.75	2	1	1.05111	35.471		15.75	1	0	1.05111	37.0618		15.75	2	0	1.05111	35.6293
15.7667	2	0	1.05222	34.9856		15.7667	2	0	1.05222	35.4746		15.7667	1	0	1.05222	37.068		15.7667	2	0	1.05222	35.6431
15.7833	2	0	1.05333	34.9589		15.7833	1	0	1.05333	35.4803		15.7833	0	0	1.05333	37.0766		15.7833	2	4	1.05333	35.6533
15.8	2	0	1.05444	34.9311		15.8	1	0	1.05444	35.4891		15.8	1	0	1.05444	37.0799		15.8	2	0	1.05444	35.6673
15.8167	2	0	1.05556	34.9077		15.8167	1	0	1.05556	35.4971		15.8167	1	0	1.05556	37.0948		15.8167	2	0	1.05556	35.6778
15.8333	2	0	1.05667	34.8809		15.8333	1	0	1.05667	35.4927		15.8333	1	0	1.05667	37.0971		15.8333	2	0	1.05667	35.6842
15.85	2	0	1.05778	34.8558		15.85	1	0	1.05778	35.491		15.85	1	0	1.05778	37.0794		15.85	2	4	1.05778	35.683
15.8667	1	2	1.05889	34.8327		15.8667	1	0	1.05889	35.4797		15.8667	2	1	1.05889	37.0692		15.8667	2	2	1.05889	35.6872
15.8833	1	0	1.06	34.8185		15.8833	1	0	1.06	35.4675		15.8833	2	1	1.06	37.0667		15.8833	2	0	1.06	35.6981
15.9	1	0	1.06111	34.815		15.9	1	0	1.06111	35.464		15.9	2	0	1.06111	37.0692		15.9	2	4	1.06111	35.715
15.9167	1	0	1.06222	34.8178		15.9167	1	0	1.06222	35.4646		15.9167	2	0	1.06222	37.0702		15.9167	2	2	1.06222	35.732
15.9333	1	0	1.06333	34.8109		15.9333	1	0	1.06333	35.4731		15.9333	2	0	1.06333	37.0806		15.9333	2	1	1.06333	35.7297
15.95	1	0	1.06444	34.8104		15.95	1	0	1.06444	35.4751		15.95	2	0	1.06444	37.0929		15.95	2	1	1.06444	35.7242
15.9667	1	0	1.06556	34.8124		15.9667	1	0	1.06556	35.465		15.9667	2	0	1.06556	37.0936		15.9667	2	0	1.06556	35.7211
15.9833	1	0	1.06667	34.8121		15.9833	1	0	1.06667	35.4481		15.9833	2	0	1.06667	37.0849		15.9833	2	0	1.06667	35.7296
16	1	0	1.06778	34.8144		16	1	0	1.06778	35.435		16	2	0	1.06778	37.0947		16	2	5	1.06778	35.7436
16.0167	1	0	1.06889	34.8135		16.0167	1	0	1.06889	35.4281		16.0167	2	0	1.06889	37.1075		16.0167	2	0	1.06889	35.7542
16.0333	1	0	1.07	34.8088		16.0333	1	0	1.07	35.4288		16.0333	2	0	1.07	37.1165		16.0333	2	0	1.07	35.7522
16.05	1	0	1.07111	34.8054		16.05	1	0	1.07111	35.4321		16.05	2	1	1.07111	37.1292		16.05	2	0	1.07111	35.7413
16.0667	2	0	1.07222	34.8012		16.0667	1	0	1.07222	35.4302		16.0667	2	0	1.07222	37.1457		16.0667	2	0	1.07222	35.7294
16.0833	1	0	1.07333	34.7982		16.0833	1	0	1.07333	35.4325		16.0833	2	3	1.07333	37.152		16.0833	2	3	1.07333	35.7202
16.1	1	0	1.07444	34.7899		16.1	1	0	1.07444	35.4279		16.1	2	4	1.07444	37.1583		16.1	2	0	1.07444	35.7125
16.1167	2	0	1.07556	34.7814		16.1167	1	0	1.07556	35.4225		16.1167	2	4	1.07556	37.1464		16.1167	2	1	1.07556	35.707
16.1333	2	0	1.07667	34.78		16.1333	1	0	1.07667	35.4061		16.1333	2	2	1.07667	37.1461		16.1333	2	0	1.07667	35.7085
16.15	2	0	1.07778	34.7801		16.15	1	0	1.07778	35.3892		16.15	2	1	1.07778	37.1496		16.15	2	0	1.07778	35.7056
16.1667	2	0	1.07889	34.7905		16.1667	1	0	1.07889	35.3646		16.1667	2	1	1.07889	37.1496		16.1667	2	1	1.07889	35.7066
16.1833	2	0	1.08	34.7966		16.1833	1	0	1.08	35.3432		16.1833	2	0	1.08	37.1406		16.1833	2	0	1.08	35.7093
16.2	2	1	1.08111	34.7929		16.2	1	0	1.08111	35.3417		16.2	2	0	1.08111	37.1445		16.2	2	6	1.08111	35.7007
16.2167	2	2	1.08222	34.7822		16.2167	0	0	1.08222	35.3417		16.2167	2	1	1.08222	37.1468		16.2167	2	1	1.08222	35.6853
16.2333	2	0	1.08333	34.7803		16.2333	1	0	1.08333	35.3374		16.2333	2	0	1.08333	37.1539		16.2333	2	5	1.08333	35.6746
16.25	2	2	1.08444	34.7786		16.25	1	0	1.08444	35.3306		16.25	2	0	1.08444	37.1693		16.25	2	3	1.08444	35.6701
16.2667	2	3	1.08556	34.7755		16.2667	2	0	1.08556	35.329		16.2667	2	0	1.08556	37.1779		16.2667	2	0	1.08556	35.6613
16.2833	2	5	1.08667	34.7714		16.2833	2	0	1.08667	35.3328		16.2833	2	0	1.08667	37.1746		16.2833	2	1	1.08667	35.6604
16.3	2	0	1.08778	34.7776		16.3	2	0	1.08778	35.3254		16.3	2	0	1.08778	37.178		16.3	2	5	1.08778	35.6546
16.3167	2	2	1.08889	34.7853		16.3167	2	0	1.08889	35.3175		16.3167	1	0	1.08889	37.1801		16.3167	2	0	1.08889	35.638
16.3333	2	0	1.09	34.7805		16.3333	2	0	1.09	35.3129		16.3333	1	0	1.09	37.1707		16.3333	2	5	1.09	35.6264
16.35	2	0	1.09111	34.7599		16.35	2	0	1.09111	35.3087		16.35	1	0	1.09111	37.1753		16.35	2	0	1.09111	35.63
16.3667	2	4	1.09222	34.7471		16.3667	2	0	1.09222	35.3064		16.3667	1	0	1.09222	37.1863		16.3667	1	0	1.09222	35.6467
16.3833	2	0	1.09333	34.7414		16.3833	2	0	1.09333	35.3026		16.3833	1	0	1.09333	37.1969		16.3833	1	0	1.09333	35.659
16.4	2	0	1.09444	34.7393		16.4	2	0	1.09444	35.2987		16.4	1	0	1.09444	37.2038		16.4	1	0	1.09444	35.6552
16.4167	2	0	1.09556	34.7356		16.4167	2	2	1.09556	35.2995		16.4167	0	0	1.09556	37.218		16.4167	1	0	1.09556	35.63
16.4333	2	0	1.09667	34.7366		16.4333	2	5	1.09667	35.2992		16.4333	1	0	1.09667	37.2126		16.4333	1	0	1.09667	35.6324
16.45	2	1	1.09778	34.7373		16.45	2	2	1.09778	35.2998		16.45	1	0	1.09778	37.212		16.45	1	0	1.09778	35.6454
16.4667	2	2	1.09889	34.735		16.4667	2	2	1.09889	35.2974		16.4667	1	0	1.09889	37.2177		16.4667	2	2	1.09889	35.6459
16.4833	2	0	1.1	34.7342		16.4833	2	2	1.1	35.2966		16.4833	1	0	1.1	37.2212		16.4833	2	0	1.1	35.6256
16.5	2	0	1.10111	34.738		16.5	2	0	1.10111	35.2968		16.5	1	0	1.10111	37.2264		16.5	2	0	1.10111	35.6113
16.5167	2	2	1.10222	34.7382		16.5167	2	0	1.10222	35.295		16.5167	1	0	1.10222	37.2237		16.5167	2	0	1.10222	35.6118
16.5333	2	0	1.10333	34.7503		16.5333	2	2	1.10333	35.2881		16.5333	1	0	1.10333	37.2333		16.5333	2	2	1.10333	35.6103
16.55	2	0	1.10444	34.7602		16.55	2	4	1.10444	35.282		16.55	1	0	1.10444	37.2373		16.55	2	0	1.10444	35.616
16.5667	2	0	1.10556	34.7616		16.5667	2	1	1.10556	35.2807		16.5667	1	0	1.10556	37.2412		16.5667	2	2	1.10556	35.6112
16.5833	2	2	1.10667	34.7633		16.5833	2	0	1.10667	35.2711		16.5833	1	0	1.10667	37.2577		16.5833	2	3	1.10667	35.6006
16.6	2	2	1.10778	34.7649		16.6	2	1	1.10778	35.2477		16.6	2	3	1.10778	37.2713		16.6	2	2	1.10778	35.5934
16.6167	2	0	1.10889	34.772		16.6167	2	4	1.10889	35.2276		16.6167	2	0	1.10889	37.2807		16.6167	2	1	1.10889	35.5973
16.6333	2	2	1.11	34.7778		16.6333	2	2	1.11	35.2142		16.6333	2	0	1.11	37.2793		16.6333	2	2	1.11	35.603
16.65	2	0	1.11111	34.7865		16.65	2	3	1.11111	35.2054		16.65	2	0	1.11111	37.287		16.65	2	8	1.11111	35.594
16.6667	2	2	1.11222	34.7874		16.6667	2	2	1.11222	35.2016		16.6667	2	0	1.11222	37.2968		16.6667	2	3	1.11222	35.5864
16.6833	2	2	1.11333	34.7702		16.6833	2	0	1.11333	35.2		16.6833	2	0	1.11333	37.292		16.6833	2	0	1.11333	35.5856
16.7	2	1	1.11444	34.7525		16.7	2	0	1.11444	35.2026		16.7	2	1	1.11444	37.2943		16.7	2	0	1.11444	35.5884
16.7167	2	0	1.11556	34.743		16.7167	2	0	1.11556	35.2055		16.7167	2	0	1.11556	37.3038		16.7167	2	2	1.11556	35.5983
16.7333	2	4	1.11667	34.7396		16.7333	2	0	1.11667	35.2013		16.7333	2	3	1.11667	37.3074		16.7333	2	4	1.11667	35.6044
16.75	2	0	1.11778	34.734		16.75	2	0	1.11778	35.1972		16.75	2	4	1.11778	37.2978		16.75	2	2	1.11778	35.6093
16.7667	2	0	1.11889	34.7343		16.7667	2	4	1.11889	35.1928		16.7667	2	2	1.11889	37.2888		16.7667	2	0	1.11889	35.6063
16.7833	2	0	1.12	34.7371		16.7833	2	2	1.12	35.1875		16.7833	2	5	1.12	37.2833		16.7833	2	1	1.12	35.5951
16.8	2	0	1.12111	34.7403		16.8	2	2	1.12111	35.1856		16.8	2	4	1.12111	37.2979		16.8	2	1	1.12111	35.5718
16.8167	2	0	1.12222	34.7478		16.8167	2	0	1.12222	35.1837		16.8167	2	0	1.12222	37.3007		16.8167	2	0	1.12222	35.5578
16.8333	2	6	1.12333	34.7458		16.8333	2	5	1.12333	35.179		16.8333	2	1	1.12333	37.2936		16.8333	2	0	1.12333	35.557
16.85	2	2	1.12444	34.7344		16.85	2	0	1.12444	35.1749		16.85	2	0	1.12444	37.2969		16.85	2	0	1.12444	35.568
16.8667	2	4	1.12556	34.7265		16.8667	2	0	1.12556	35.1751		16.8667	2	2	1.12556	37.302		16.8667	2	0	1.12556	35.5818
16.8833	2	0	1.12667	34.7236		16.8833	2	0	1.12667	35.1751		16.8833	2	0	1.12667	37.3019		16.8833	2	1	1.12667	35.6011
16.9	2	0	1.12778	34.7246		16.9	2	7	1.12778	35.1617		16.9	2	1	1.12778	37.3132		16.9	2	1	1.12778	35.6259
16.9167	2	1	1.12889	34.7264		16.9167	2	1	1.12889	35.1497		16.9167	2	0	1.12889	37.3289		16.9167	2	4	1.12889	35.6441
16.9333	2	0	1.13	34.7142		16.9333	2	0	1.13	35.1346		16.9333	2	0	1.13	37.3221		16.9333	2	0	1.13	35.6622
16.95	2	6	1.13111	34.702		16.95	2	0	1.13111	35.1254		16.95	2	0	1.13111	37.2984		16.95	2	2	1.13111	35.6724
16.9667	2	5	1.13222	34.6878		16.9667	2	0	1.13222	35.1168		16.9667	2	0	1.13222	37.2888		16.9667	2	1	1.13222	35.6803
16.9833	2	4	1.13333	34.6838		16.9833	2	0	1.13333	35.1103		16.9833	2	0	1.13333	37.3008		16.9833	2	1	1.13333	35.6961
17	2	6	1.13444	34.6865		17	2	0	1.13444	35.1088		17	2	0	1.13444	37.3124		17	2	0	1.13444	35.6941
17.0167	2	0	1.13556	34.6929		17.0167	1	0	1.13556	35.1017		17.0167	2	0	1.13556	37.3061		17.0167	2	1	1.13556	35.696
17.0333	2	4	1.13667	34.7043		17.0333	1	0	1.13667	35.0937		17.0333	2	0	1.13667	37.2986		17.0333	2	0	1.13667	35.7114
17.05	2	1	1.13778	34.7144		17.05	2	0	1.13778	35.0903		17.05	1	0	1.13778	37.3113		17.05	2	0	1.13778	35.7269
17.0667	2	3	1.13889	34.726		17.0667	2	1	1.13889	35.0817		17.0667	1	0	1.13889	37.3275		17.0667	1	0	1.13889	35.7447
17.0833	2	0	1.14	34.7387		17.0833	1	0	1.14	35.0722		17.0833	1	0	1.14	37.3353		17.0833	1	0	1.14	35.7474
17.1	2	0	1.14111	34.7669		17.1	1	0	1.14111	35.0619		17.1	1	0	1.14111	37.3373		17.1	1	0	1.14111	35.7397
17.1167	2	1	1.14222	34.8042		17.1167	1	0	1.14222	35.0513		17.1167	1	0	1.14222	37.3297		17.1167	1	0	1.14222	35.7429
17.1333	2	0	1.14333	34.8421		17.1333	1	0	1.14333	35.0432		17.1333	0	0	1.14333	37.3165		17.1333	1	0	1.14333	35.7482
17.15	2	0	1.14444	34.8881		17.15	1	0	1.14444	35.0386		17.15	1	0	1.14444	37.3021		17.15	1	0	1.14444	35.7444
17.1667	2	0	1.14556	34.943		17.1667	1	0	1.14556	35.0293		17.1667	1	0	1.14556	37.2903		17.1667	1	0	1.14556	35.7417
17.1833	2	0	1.14667	34.9927		17.1833	2	0	1.14667	35.0221		17.1833	1	0	1.14667	37.2837		17.1833	1	0	1.14667	35.7312
17.2	2	1	1.14778	35.0433		17.2	2	0	1.14778	35.0155		17.2	1	0	1.14778	37.2803		17.2	1	0	1.14778	35.7272
17.2167	2	4	1.14889	35.0865		17.2167	2	2	1.14889	35.0071		17.2167	1	0	1.14889	37.281		17.2167	1	0	1.14889	35.7278
17.2333	2	1	1.15	35.1198		17.2333	2	3	1.15	35.0082		17.2333	1	0	1.15	37.2888		17.2333	1	0	1.15	35.7274
17.25	2	4	1.15111	35.1436		17.25	2	1	1.15111	35.0053		17.25	1	0	1.15111	37.2918		17.25	1	0	1.15111	35.7256
17.2667	2	1	1.15222	35.1664		17.2667	2	0	1.15222	35.0055		17.2667	1	0	1.15222	37.3008		17.2667	1	0	1.15222	35.7262
17.2833	1	0	1.15333	35.1814		17.2833	2	0	1.15333	35.0052		17.2833	1	0	1.15333	37.2969		17.2833	1	0	1.15333	35.7335
17.3	1	0	1.15444	35.1907		17.3	2	3	1.15444	35.0016		17.3	1	0	1.15444	37.2846		17.3	1	0	1.15444	35.7373
17.3167	1	0	1.15556	35.1987		17.3167	1	0	1.15556	34.9949		17.3167	1	0	1.15556	37.2874		17.3167	2	0	1.15556	35.7408
17.3333	1	0	1.15667	35.1753		17.3333	1	0	1.15667	34.9893		17.3333	1	0	1.15667	37.2947		17.3333	2	3	1.15667	35.7259
17.35	1	0	1.15778	35.1337		17.35	1	0	1.15778	34.9883		17.35	1	0	1.15778	37.2945		17.35	2	0	1.15778	35.6869
17.3667	1	0	1.15889	35.0823		17.3667	1	0	1.15889	34.9843		17.3667	0	0	1.15889	37.2905		17.3667	2	0	1.15889	35.6514
17.3833	1	0	1.16	35.0339		17.3833	1	0	1.16	34.9659		17.3833	1	0	1.16	37.2818		17.3833	2	0	1.16	35.6437
17.4	1	0	1.16111	34.9912		17.4	1	0	1.16111	34.9475		17.4	1	0	1.16111	37.2715		17.4	2	3	1.16111	35.6189
17.4167	1	0	1.16222	34.9589		17.4167	2	1	1.16222	34.9351		17.4167	1	0	1.16222	37.2726		17.4167	2	6	1.16222	35.6185
17.4333	1	0	1.16333	34.9331		17.4333	2	0	1.16333	34.9273		17.4333	1	0	1.16333	37.2816		17.4333	2	6	1.16333	35.6355
17.45	1	0	1.16444	34.9081		17.45	2	2	1.16444	34.9248		17.45	1	0	1.16444	37.2891		17.45	2	0	1.16444	35.6502
17.4667	1	0	1.16556	34.8897		17.4667	2	0	1.16556	34.9198		17.4667	1	0	1.16556	37.2895		17.4667	2	3	1.16556	35.6493
17.4833	1	0	1.16667	34.8903		17.4833	2	0	1.16667	34.9168		17.4833	1	0	1.16667	37.2943		17.4833	2	2	1.16667	35.657
17.5	1	0	1.16778	34.894		17.5	2	3	1.16778	34.9182		17.5	1	0	1.16778	37.2913		17.5	2	0	1.16778	35.6767
17.5167	1	0	1.16889	34.8996		17.5167	2	3	1.16889	34.924		17.5167	1	0	1.16889	37.3035		17.5167	2	2	1.16889	35.6994
17.5333	1	0	1.17	34.9001		17.5333	2	0	1.17	34.9246		17.5333	0	0	1.17	37.3047		17.5333	2	3	1.17	35.7191
17.55	1	0	1.17111	34.889		17.55	2	3	1.17111	34.9103		17.55	1	0	1.17111	37.2875		17.55	2	1	1.17111	35.7347
17.5667	1	0	1.17222	34.8759		17.5667	2	5	1.17222	34.9014		17.5667	1	0	1.17222	37.2777		17.5667	2	4	1.17222	35.7429
17.5833	1	0	1.17333	34.8777		17.5833	2	3	1.17333	34.9042		17.5833	1	0	1.17333	37.2853		17.5833	2	1	1.17333	35.7581
17.6	1	0	1.17444	34.879		17.6	1	0	1.17444	34.9103		17.6	1	0	1.17444	37.2905		17.6	1	0	1.17444	35.7733
17.6167	1	0	1.17556	34.8895		17.6167	1	0	1.17556	34.9132		17.6167	1	0	1.17556	37.2927		17.6167	2	0	1.17556	35.7921
17.6333	1	0	1.17667	34.9066		17.6333	1	0	1.17667	34.9097		17.6333	0	0	1.17667	37.2975		17.6333	2	0	1.17667	35.8035
17.65	1	0	1.17778	34.9213		17.65	1	0	1.17778	34.9089		17.65	2	0	1.17778	37.2805		17.65	2	0	1.17778	35.8076
17.6667	2	0	1.17889	34.931		17.6667	1	0	1.17889	34.9154		17.6667	2	2	1.17889	37.267		17.6667	2	0	1.17889	35.8123
17.6833	2	1	1.18	34.9353		17.6833	1	0	1.18	34.925		17.6833	2	0	1.18	37.277		17.6833	2	0	1.18	35.7904
17.7	2	0	1.18111	34.9436		17.7	1	0	1.18111	34.9273		17.7	2	0	1.18111	37.2786		17.7	2	1	1.18111	35.7529
17.7167	2	0	1.18222	34.9482		17.7167	1	0	1.18222	34.9229		17.7167	2	0	1.18222	37.2838		17.7167	2	3	1.18222	35.7157
17.7333	2	0	1.18333	34.949		17.7333	1	0	1.18333	34.9173		17.7333	2	0	1.18333	37.2869		17.7333	1	0	1.18333	35.6857
17.75	2	0	1.18444	34.9559		17.75	0	0	1.18444	34.9107		17.75	2	0	1.18444	37.2822		17.75	1	0	1.18444	35.6565
17.7667	2	0	1.18556	34.9746		17.7667	1	0	1.18556	34.9076		17.7667	2	2	1.18556	37.2833		17.7667	1	0	1.18556	35.634
17.7833	2	2	1.18667	34.9941		17.7833	1	0	1.18667	34.902		17.7833	2	0	1.18667	37.2785		17.7833	1	0	1.18667	35.6309
17.8	2	2	1.18778	35.0084		17.8	1	3	1.18778	34.8881		17.8	2	1	1.18778	37.2779		17.8	1	0	1.18778	35.6409
17.8167	2	6	1.18889	35.021		17.8167	2	3	1.18889	34.8796		17.8167	2	4	1.18889	37.2816		17.8167	1	0	1.18889	35.6305
17.8333	2	4	1.19	35.0341		17.8333	2	0	1.19	34.8753		17.8333	2	0	1.19	37.2903		17.8333	0	0	1.19	35.6433
17.85	2	2	1.19111	35.0451		17.85	2	0	1.19111	34.8768		17.85	2	2	1.19111	37.2939		17.85	1	0	1.19111	35.6602
17.8667	2	1	1.19222	35.0594		17.8667	2	2	1.19222	34.882		17.8667	2	4	1.19222	37.2777		17.8667	1	0	1.19222	35.6786
17.8833	2	5	1.19333	35.0721		17.8833	2	3	1.19333	34.8852		17.8833	2	2	1.19333	37.265		17.8833	1	0	1.19333	35.6882
17.9	2	2	1.19444	35.0857		17.9	2	1	1.19444	34.8916		17.9	2	0	1.19444	37.2511		17.9	1	0	1.19444	35.6986
17.9167	2	1	1.19556	35.0987		17.9167	2	0	1.19556	34.8946		17.9167	2	3	1.19556	37.2371		17.9167	1	0	1.19556	35.7064
17.9333	2	0	1.19667	35.1116		17.9333	2	5	1.19667	34.8958		17.9333	2	2	1.19667	37.2292		17.9333	1	1	1.19667	35.7127
17.95	2	0	1.19778	35.1258		17.95	2	5	1.19778	34.9102		17.95	2	1	1.19778	37.2193		17.95	1	0	1.19778	35.7167
17.9667	2	0	1.19889	35.1384		17.9667	2	5	1.19889	34.9366		17.9667	2	4	1.19889	37.206		17.9667	1	0	1.19889	35.7167
17.9833	2	0	1.2	35.1541		17.9833	2	4	1.2	34.9673		17.9833	2	5	1.2	37.1894		17.9833	0	0	1.2	35.723
18	2	7	1.20111	35.1697		18	2	5	1.20111	35.0173		18	2	5	1.20111	37.1863		18	0	0	1.20111	35.7309
18.0167	2	0	1.20222	35.1803		18.0167	2	1	1.20222	35.0775		18.0167	2	5	1.20222	37.1991		18.0167	0	0	1.20222	35.743
18.0333	2	1	1.20333	35.1894		18.0333	2	1	1.20333	35.1229		18.0333	2	1	1.20333	37.211		18.0333	1	0	1.20333	35.7518
18.05	2	3	1.20444	35.2017		18.05	2	3	1.20444	35.1809		18.05	2	0	1.20444	37.2071		18.05	1	0	1.20444	35.7584
18.0667	2	1	1.20556	35.2134		18.0667	2	5	1.20556	35.2371		18.0667	2	0	1.20556	37.1991		18.0667	1	0	1.20556	35.7641
18.0833	2	4	1.20667	35.2215		18.0833	2	3	1.20667	35.2809		18.0833	2	0	1.20667	37.1978		18.0833	1	0	1.20667	35.7664
18.1	2	3	1.20778	35.2334		18.1	1	0	1.20778	35.3175		18.1	2	0	1.20778	37.1887		18.1	1	0	1.20778	35.7727
18.1167	2	6	1.20889	35.248		18.1167	1	0	1.20889	35.346		18.1167	2	0	1.20889	37.194		18.1167	1	0	1.20889	35.7702
18.1333	2	7	1.21	35.2595		18.1333	1	0	1.21	35.3723		18.1333	2	0	1.21	37.1791		18.1333	1	0	1.21	35.7676
18.15	2	1	1.21111	35.2673		18.15	1	0	1.21111	35.3901		18.15	1	0	1.21111	37.166		18.15	1	0	1.21111	35.7658
18.1667	2	3	1.21222	35.2716		18.1667	1	0	1.21222	35.3971		18.1667	1	0	1.21222	37.1664		18.1667	2	3	1.21222	35.7773
18.1833	2	5	1.21333	35.2833		18.1833	1	0	1.21333	35.405		18.1833	1	0	1.21333	37.1659		18.1833	1	0	1.21333	35.7828
18.2	2	0	1.21444	35.2957		18.2	1	0	1.21444	35.4189		18.2	1	0	1.21444	37.1634		18.2	1	0	1.21444	35.7814
18.2167	2	0	1.21556	35.3017		18.2167	1	0	1.21556	35.4296		18.2167	1	0	1.21556	37.1609		18.2167	1	1	1.21556	35.7723
18.2333	2	0	1.21667	35.3074		18.2333	1	2	1.21667	35.4356		18.2333	1	0	1.21667	37.1577		18.2333	1	0	1.21667	35.7657
18.25	2	2	1.21778	35.3197		18.25	1	0	1.21778	35.4263		18.25	1	0	1.21778	37.1567		18.25	1	0	1.21778	35.7603
18.2667	2	0	1.21889	35.3273		18.2667	1	0	1.21889	35.414		18.2667	0	0	1.21889	37.1554		18.2667	1	0	1.21889	35.749
18.2833	2	0	1.22	35.3335		18.2833	1	0	1.22	35.4141		18.2833	1	0	1.22	37.1559		18.2833	1	0	1.22	35.7412
18.3	2	0	1.22111	35.346		18.3	1	0	1.22111	35.4196		18.3	1	0	1.22111	37.1639		18.3	1	0	1.22111	35.7325
18.3167	2	0	1.22222	35.3534		18.3167	1	0	1.22222	35.423		18.3167	1	0	1.22222	37.1691		18.3167	0	0	1.22222	35.7246
18.3333	1	1	1.22333	35.3583		18.3333	1	0	1.22333	35.4348		18.3333	1	0	1.22333	37.1743		18.3333	1	0	1.22333	35.7167
18.35	1	0	1.22444	35.362		18.35	0	0	1.22444	35.4466		18.35	1	0	1.22444	37.1787		18.35	1	0	1.22444	35.7061
18.3667	1	0	1.22556	35.3651		18.3667	0	0	1.22556	35.4573		18.3667	1	0	1.22556	37.1752		18.3667	1	0	1.22556	35.6967
18.3833	1	0	1.22667	35.3675		18.3833	1	5	1.22667	35.4661		18.3833	1	0	1.22667	37.1568		18.3833	1	0	1.22667	35.6856
18.4	1	0	1.22778	35.3611		18.4	2	2	1.22778	35.4706		18.4	1	0	1.22778	37.1578		18.4	1	0	1.22778	35.6782
18.4167	1	0	1.22889	35.3589		18.4167	2	2	1.22889	35.4767		18.4167	1	0	1.22889	37.1675		18.4167	1	0	1.22889	35.6746
18.4333	1	0	1.23	35.3562		18.4333	2	1	1.23	35.4833		18.4333	1	0	1.23	37.1766		18.4333	0	0	1.23	35.6647
18.45	1	0	1.23111	35.3519		18.45	2	1	1.23111	35.4707		18.45	1	0	1.23111	37.1796		18.45	0	1	1.23111	35.6532
18.4667	2	0	1.23222	35.3535		18.4667	2	0	1.23222	35.4353		18.4667	1	0	1.23222	37.1754		18.4667	1	0	1.23222	35.6472
18.4833	2	0	1.23333	35.3605		18.4833	2	0	1.23333	35.3951		18.4833	1	0	1.23333	37.1724		18.4833	1	0	1.23333	35.638
18.5	2	0	1.23444	35.3693		18.5	2	0	1.23444	35.3519		18.5	1	0	1.23444	37.1742		18.5	1	3	1.23444	35.6229
18.5167	2	0	1.23556	35.3696		18.5167	2	1	1.23556	35.3125		18.5167	1	0	1.23556	37.167		18.5167	1	0	1.23556	35.602
18.5333	2	0	1.23667	35.3655		18.5333	2	6	1.23667	35.2722		18.5333	1	0	1.23667	37.1568		18.5333	1	0	1.23667	35.5719
18.55	2	0	1.23778	35.3592		18.55	1	0	1.23778	35.2408		18.55	1	0	1.23778	37.1621		18.55	1	0	1.23778	35.5606
18.5667	2	1	1.23889	35.348		18.5667	1	0	1.23889	35.2183		18.5667	0	0	1.23889	37.1692		18.5667	2	0	1.23889	35.5616
18.5833	2	2	1.24	35.3367		18.5833	1	0	1.24	35.2017		18.5833	1	0	1.24	37.1714		18.5833	2	0	1.24	35.5582
18.6	2	2	1.24111	35.3246		18.6	1	0	1.24111	35.1806		18.6	1	0	1.24111	37.1784		18.6	2	0	1.24111	35.5585
18.6167	2	7	1.24222	35.3194		18.6167	1	0	1.24222	35.1743		18.6167	1	0	1.24222	37.1979		18.6167	2	0	1.24222	35.5589
18.6333	2	7	1.24333	35.3182		18.6333	1	2	1.24333	35.183		18.6333	1	0	1.24333	37.2159		18.6333	2	0	1.24333	35.556
18.65	2	5	1.24444	35.3105		18.65	1	0	1.24444	35.1857		18.65	1	0	1.24444	37.2307		18.65	2	1	1.24444	35.5372
18.6667	2	3	1.24556	35.3098		18.6667	1	0	1.24556	35.1823		18.6667	1	0	1.24556	37.2575		18.6667	2	2	1.24556	35.5319
18.6833	2	0	1.24667	35.315		18.6833	2	0	1.24667	35.1732		18.6833	1	0	1.24667	37.2834		18.6833	2	1	1.24667	35.5172
18.7	2	0	1.24778	35.3133		18.7	2	1	1.24778	35.1671		18.7	1	0	1.24778	37.3005		18.7	2	3	1.24778	35.5189
18.7167	2	0	1.24889	35.3116		18.7167	2	4	1.24889	35.1589		18.7167	1	0	1.24889	37.3098		18.7167	2	2	1.24889	35.5484
18.7333	2	7	1.25	35.3106		18.7333	2	0	1.25	35.1541		18.7333	1	0	1.25	37.3169		18.7333	1	0	1.25	35.5578
18.75	2	1	1.25111	35.3072		18.75	1	0	1.25111	35.152		18.75	1	0	1.25111	37.3309		18.75	1	0	1.25111	35.5728
18.7667	2	2	1.25222	35.3101		18.7667	1	0	1.25222	35.1508		18.7667	1	0	1.25222	37.3427		18.7667	1	0	1.25222	35.604
18.7833	2	6	1.25333	35.3108		18.7833	1	0	1.25333	35.1469		18.7833	0	0	1.25333	37.3495		18.7833	1	0	1.25333	35.6261
18.8	2	13	1.25444	35.3157		18.8	1	0	1.25444	35.1456		18.8	1	0	1.25444	37.3572		18.8	1	0	1.25444	35.6382
18.8167	2	3	1.25556	35.3155		18.8167	1	0	1.25556	35.1475		18.8167	1	0	1.25556	37.3648		18.8167	1	0	1.25556	35.6406
18.8333	2	0	1.25667	35.3151		18.8333	1	0	1.25667	35.1541		18.8333	1	0	1.25667	37.3756		18.8333	1	0	1.25667	35.6422
18.85	2	2	1.25778	35.3094		18.85	1	0	1.25778	35.1484		18.85	1	0	1.25778	37.3725		18.85	1	1	1.25778	35.6434
18.8667	2	4	1.25889	35.3049		18.8667	2	0	1.25889	35.139		18.8667	1	0	1.25889	37.3688		18.8667	1	0	1.25889	35.6467
18.8833	2	1	1.26	35.3024		18.8833	1	0	1.26	35.1337		18.8833	1	0	1.26	37.3669		18.8833	1	0	1.26	35.6448
18.9	2	0	1.26111	35.3		18.9	1	0	1.26111	35.1312		18.9	1	0	1.26111	37.3664		18.9	1	0	1.26111	35.6428
18.9167	2	0	1.26222	35.2946		18.9167	1	0	1.26222	35.1333		18.9167	1	0	1.26222	37.3628		18.9167	0	0	1.26222	35.6405
18.9333	2	2	1.26333	35.2843		18.9333	1	0	1.26333	35.1271		18.9333	1	0	1.26333	37.364		18.9333	1	0	1.26333	35.6379
18.95	2	3	1.26444	35.2879		18.95	1	0	1.26444	35.1114		18.95	0	0	1.26444	37.369		18.95	1	0	1.26444	35.6304
18.9667	2	2	1.26556	35.3106		18.9667	1	0	1.26556	35.0919		18.9667	0	0	1.26556	37.3693		18.9667	0	0	1.26556	35.6275
18.9833	2	0	1.26667	35.3251		18.9833	1	0	1.26667	35.0698		18.9833	1	1	1.26667	37.3507		18.9833	1	0	1.26667	35.6326
19	1	0	1.26778	35.3413		19	1	0	1.26778	35.0456		19	2	4	1.26778	37.3231		19	1	0	1.26778	35.6417
19.0167	1	0	1.26889	35.3516		19.0167	1	0	1.26889	35.0336		19.0167	2	0	1.26889	37.3054		19.0167	1	0	1.26889	35.6509
19.0333	1	0	1.27	35.3699		19.0333	1	1	1.27	35.032		19.0333	2	0	1.27	37.2874		19.0333	1	0	1.27	35.6637
19.05	1	0	1.27111	35.388		19.05	2	1	1.27111	35.0382		19.05	2	0	1.27111	37.27		19.05	1	0	1.27111	35.6672
19.0667	1	0	1.27222	35.3896		19.0667	2	1	1.27222	35.0458		19.0667	2	0	1.27222	37.2712		19.0667	1	0	1.27222	35.6689
19.0833	1	0	1.27333	35.3915		19.0833	1	4	1.27333	35.0562		19.0833	2	0	1.27333	37.2892		19.0833	1	0	1.27333	35.6613
19.1	1	0	1.27444	35.401		19.1	2	3	1.27444	35.0649		19.1	2	0	1.27444	37.3144		19.1	1	0	1.27444	35.6544
19.1167	1	0	1.27556	35.4039		19.1167	2	0	1.27556	35.0627		19.1167	2	0	1.27556	37.3233		19.1167	1	0	1.27556	35.6533
19.1333	1	0	1.27667	35.4034		19.1333	2	0	1.27667	35.0617		19.1333	2	0	1.27667	37.321		19.1333	1	0	1.27667	35.6513
19.15	0	0	1.27778	35.4109		19.15	1	0	1.27778	35.0637		19.15	2	0	1.27778	37.3146		19.15	0	1	1.27778	35.6506
19.1667	1	0	1.27889	35.4129		19.1667	1	0	1.27889	35.0621		19.1667	2	3	1.27889	37.3102		19.1667	1	0	1.27889	35.6536
19.1833	1	0	1.28	35.4119		19.1833	1	0	1.28	35.0513		19.1833	2	1	1.28	37.317		19.1833	2	1	1.28	35.664
19.2	1	0	1.28111	35.4221		19.2	1	0	1.28111	35.036		19.2	2	7	1.28111	37.3188		19.2	2	1	1.28111	35.6619
19.2167	1	0	1.28222	35.4188		19.2167	1	0	1.28222	35.023		19.2167	2	0	1.28222	37.3123		19.2167	2	0	1.28222	35.6631
19.2333	1	0	1.28333	35.423		19.2333	1	0	1.28333	35.0192		19.2333	2	0	1.28333	37.3004		19.2333	2	2	1.28333	35.657
19.25	1	0	1.28444	35.4413		19.25	1	0	1.28444	35.0149		19.25	2	0	1.28444	37.3078		19.25	2	10	1.28444	35.6708
19.2667	0	0	1.28556	35.4509		19.2667	1	0	1.28556	35.0104		19.2667	2	0	1.28556	37.3004		19.2667	2	0	1.28556	35.6831
19.2833	1	0	1.28667	35.4634		19.2833	1	0	1.28667	35.0055		19.2833	2	0	1.28667	37.297		19.2833	2	2	1.28667	35.6877
19.3	1	0	1.28778	35.4784		19.3	1	0	1.28778	35.0007		19.3	2	0	1.28778	37.2897		19.3	2	4	1.28778	35.6967
19.3167	1	0	1.28889	35.4837		19.3167	2	3	1.28889	34.9956		19.3167	1	0	1.28889	37.2721		19.3167	2	0	1.28889	35.6866
19.3333	1	0	1.29	35.4822		19.3333	2	2	1.29	34.9893		19.3333	2	0	1.29	37.2591		19.3333	2	0	1.29	35.6746
19.35	1	0	1.29111	35.4812		19.35	2	5	1.29111	34.9734		19.35	2	0	1.29111	37.2538		19.35	2	2	1.29111	35.6809
19.3667	1	0	1.29222	35.4909		19.3667	2	0	1.29222	34.9522		19.3667	1	0	1.29222	37.2619		19.3667	2	2	1.29222	35.6955
19.3833	0	0	1.29333	35.4888		19.3833	2	0	1.29333	34.9368		19.3833	1	0	1.29333	37.2559		19.3833	2	0	1.29333	35.7137
19.4	1	0	1.29444	35.4858		19.4	2	0	1.29444	34.9289		19.4	1	0	1.29444	37.2418		19.4	2	5	1.29444	35.7263
19.4167	1	0	1.29556	35.4787		19.4167	2	0	1.29556	34.9251		19.4167	1	0	1.29556	37.2318		19.4167	2	5	1.29556	35.7398
19.4333	1	0	1.29667	35.4776		19.4333	2	4	1.29667	34.923		19.4333	1	0	1.29667	37.2235		19.4333	2	0	1.29667	35.7329
19.45	1	0	1.29778	35.4753		19.45	2	0	1.29778	34.9245		19.45	1	0	1.29778	37.2184		19.45	2	0	1.29778	35.7184
19.4667	1	0	1.29889	35.4689		19.4667	2	1	1.29889	34.9355		19.4667	1	0	1.29889	37.2211		19.4667	2	0	1.29889	35.7171
19.4833	2	0	1.3	35.4719		19.4833	2	8	1.3	34.9439		19.4833	1	0	1.3	37.2142		19.4833	2	2	1.3	35.7234
19.5	1	2	1.30111	35.4721		19.5	2	5	1.30111	34.9427		19.5	1	0	1.30111	37.2264		19.5	2	0	1.30111	35.7298
19.5167	1	0	1.30222	35.4751		19.5167	2	7	1.30222	34.9412		19.5167	1	0	1.30222	37.256		19.5167	2	0	1.30222	35.7375
19.5333	1	0	1.30333	35.48		19.5333	2	0	1.30333	34.9292		19.5333	1	0	1.30333	37.2853		19.5333	2	2	1.30333	35.7521
19.55	1	0	1.30444	35.4744		19.55	2	5	1.30444	34.9124		19.55	1	0	1.30444	37.3139		19.55	2	5	1.30444	35.7645
19.5667	1	0	1.30556	35.4485		19.5667	2	1	1.30556	34.8995		19.5667	1	0	1.30556	37.3385		19.5667	2	0	1.30556	35.7648
19.5833	1	0	1.30667	35.44		19.5833	1	0	1.30667	34.8905		19.5833	1	0	1.30667	37.353		19.5833	2	0	1.30667	35.7663
19.6	1	0	1.30778	35.4367		19.6	1	0	1.30778	34.8845		19.6	1	0	1.30778	37.3645		19.6	2	4	1.30778	35.7568
19.6167	1	0	1.30889	35.4378		19.6167	1	0	1.30889	34.8836		19.6167	1	0	1.30889	37.381		19.6167	2	0	1.30889	35.7376
19.6333	0	0	1.31	35.4364		19.6333	1	0	1.31	34.8855		19.6333	1	0	1.31	37.3834		19.6333	2	0	1.31	35.7197
19.65	1	0	1.31111	35.431		19.65	1	0	1.31111	34.896		19.65	0	0	1.31111	37.3874		19.65	2	1	1.31111	35.7047
19.6667	1	0	1.31222	35.4288		19.6667	1	0	1.31222	34.8952		19.6667	1	0	1.31222	37.3879		19.6667	2	5	1.31222	35.6977
19.6833	1	1	1.31333	35.4217		19.6833	1	0	1.31333	34.8732		19.6833	1	0	1.31333	37.3778		19.6833	2	1	1.31333	35.6897
19.7	1	0	1.31444	35.4135		19.7	1	0	1.31444	34.8579		19.7	1	0	1.31444	37.3713		19.7	2	0	1.31444	35.685
19.7167	1	0	1.31556	35.4023		19.7167	1	0	1.31556	34.8498		19.7167	1	0	1.31556	37.3692		19.7167	2	1	1.31556	35.7018
19.7333	1	0	1.31667	35.4069		19.7333	1	3	1.31667	34.8511		19.7333	1	0	1.31667	37.3655		19.7333	2	6	1.31667	35.6915
19.75	0	0	1.31778	35.4092		19.75	1	0	1.31778	34.8552		19.75	0	0	1.31778	37.3455		19.75	2	0	1.31778	35.6811
19.7667	0	0	1.31889	35.4047		19.7667	1	0	1.31889	34.8593		19.7667	0	0	1.31889	37.3302		19.7667	2	0	1.31889	35.6727
19.7833	2	0	1.32	35.4059		19.7833	1	0	1.32	34.8675		19.7833	1	0	1.32	37.3035		19.7833	2	0	1.32	35.6662
19.8	2	6	1.32111	35.4074		19.8	1	0	1.32111	34.8711		19.8	1	0	1.32111	37.2788		19.8	2	8	1.32111	35.6667
19.8167	2	1	1.32222	35.4172		19.8167	1	0	1.32222	34.87		19.8167	1	0	1.32222	37.272		19.8167	2	0	1.32222	35.661
19.8333	2	1	1.32333	35.431		19.8333	2	0	1.32333	34.8676		19.8333	1	0	1.32333	37.2719		19.8333	2	6	1.32333	35.6544
19.85	2	0	1.32444	35.4442		19.85	1	0	1.32444	34.8713		19.85	1	0	1.32444	37.2668		19.85	2	0	1.32444	35.6544
19.8667	2	0	1.32556	35.4483		19.8667	1	0	1.32556	34.8768		19.8667	1	0	1.32556	37.2643		19.8667	2	0	1.32556	35.6567
19.8833	2	1	1.32667	35.4391		19.8833	1	0	1.32667	34.877		19.8833	1	0	1.32667	37.2645		19.8833	2	3	1.32667	35.6388
19.9	2	5	1.32778	35.4283		19.9	1	0	1.32778	34.8882		19.9	1	0	1.32778	37.2693		19.9	2	4	1.32778	35.6298
19.9167	2	4	1.32889	35.4298		19.9167	1	0	1.32889	34.8923		19.9167	0	0	1.32889	37.274		19.9167	2	0	1.32889	35.6237
19.9333	2	0	1.33	35.422		19.9333	1	0	1.33	34.8943		19.9333	0	0	1.33	37.2693		19.9333	2	1	1.33	35.6204
19.95	2	0	1.33111	35.419		19.95	2	10	1.33111	34.8904		19.95	1	0	1.33111	37.2566		19.95	2	2	1.33111	35.6193
19.9667	2	0	1.33222	35.4014		19.9667	2	6	1.33222	34.8709		19.9667	1	0	1.33222	37.259		19.9667	2	6	1.33222	35.6184
19.9833	1	0	1.33333	35.3755		19.9833	2	0	1.33333	34.8545		19.9833	1	0	1.33333	37.2625		19.9833	2	8	1.33333	35.6009
20	1	0	1.33444	35.3667		20	2	4	1.33444	34.8387		20	1	0	1.33444	37.2513		20	2	7	1.33444	35.5778
20.0167	1	0	1.33556	35.3732		20.0167	2	5	1.33556	34.831		20.0167	1	0	1.33556	37.2383		20.0167	2	0	1.33556	35.5629
20.0333	1	0	1.33667	35.3862		20.0333	2	2	1.33667	34.8322		20.0333	1	0	1.33667	37.2366		20.0333	2	9	1.33667	35.5434
20.05	1	0	1.33778	35.399		20.05	2	0	1.33778	34.8382		20.05	1	0	1.33778	37.2337		20.05	2	1	1.33778	35.5269
20.0667	1	0	1.33889	35.4168		20.0667	2	2	1.33889	34.8434		20.0667	1	0	1.33889	37.2352		20.0667	2	5	1.33889	35.5162
20.0833	1	0	1.34	35.434		20.0833	2	1	1.34	34.849		20.0833	2	0	1.34	37.242		20.0833	2	2	1.34	35.5081
20.1	1	0	1.34111	35.445		20.1	2	0	1.34111	34.854		20.1	1	0	1.34111	37.2481		20.1	2	3	1.34111	35.4955
20.1167	1	0	1.34222	35.4619		20.1167	1	0	1.34222	34.8508		20.1167	1	0	1.34222	37.2521		20.1167	2	5	1.34222	35.482
20.1333	1	1	1.34333	35.4742		20.1333	1	0	1.34333	34.8361		20.1333	1	0	1.34333	37.2567		20.1333	2	1	1.34333	35.4717
20.15	1	0	1.34444	35.4853		20.15	1	0	1.34444	34.8315		20.15	1	0	1.34444	37.2676		20.15	2	0	1.34444	35.4627
20.1667	1	0	1.34556	35.4906		20.1667	1	0	1.34556	34.8367		20.1667	1	0	1.34556	37.2867		20.1667	2	0	1.34556	35.4516
20.1833	1	0	1.34667	35.5036		20.1833	1	0	1.34667	34.8401		20.1833	1	0	1.34667	37.2997		20.1833	2	1	1.34667	35.4418
20.2	1	0	1.34778	35.5033		20.2	1	2	1.34778	34.8531		20.2	1	0	1.34778	37.3184		20.2	2	0	1.34778	35.4361
20.2167	1	0	1.34889	35.5061		20.2167	1	0	1.34889	34.8645		20.2167	1	0	1.34889	37.3432		20.2167	2	0	1.34889	35.4351
20.2333	1	0	1.35	35.5101		20.2333	1	0	1.35	34.8706		20.2333	0	0	1.35	37.3631		20.2333	2	0	1.35	35.4205
20.25	1	0	1.35111	35.5072		20.25	1	0	1.35111	34.8643		20.25	2	0	1.35111	37.3877		20.25	2	0	1.35111	35.4015
20.2667	2	0	1.35222	35.5039		20.2667	0	0	1.35222	34.8512		20.2667	1	0	1.35222	37.3974		20.2667	1	0	1.35222	35.3838
20.2833	2	0	1.35333	35.5053		20.2833	1	0	1.35333	34.8325		20.2833	1	0	1.35333	37.4096		20.2833	2	1	1.35333	35.3749
20.3	2	1	1.35444	35.5082		20.3	1	0	1.35444	34.8132		20.3	1	0	1.35444	37.399		20.3	2	2	1.35444	35.3593
20.3167	2	4	1.35556	35.5168		20.3167	1	0	1.35556	34.8064		20.3167	0	0	1.35556	37.3795		20.3167	2	0	1.35556	35.3475
20.3333	2	2	1.35667	35.5186		20.3333	1	0	1.35667	34.8064		20.3333	0	0	1.35667	37.3666		20.3333	2	0	1.35667	35.3375
20.35	2	0	1.35778	35.5277		20.35	1	0	1.35778	34.8094		20.35	1	0	1.35778	37.356		20.35	2	0	1.35778	35.3324
20.3667	2	2	1.35889	35.5447		20.3667	1	0	1.35889	34.8128		20.3667	2	0	1.35889	37.3453		20.3667	2	2	1.35889	35.3324
20.3833	2	1	1.36	35.5581		20.3833	1	0	1.36	34.8206		20.3833	2	0	1.36	37.3338		20.3833	2	1	1.36	35.3363
20.4	2	2	1.36111	35.5652		20.4	1	1	1.36111	34.8189		20.4	2	0	1.36111	37.3397		20.4	2	0	1.36111	35.3344
20.4167	2	3	1.36222	35.5842		20.4167	1	1	1.36222	34.8137		20.4167	2	0	1.36222	37.3452		20.4167	2	2	1.36222	35.3183
20.4333	2	3	1.36333	35.5933		20.4333	1	0	1.36333	34.8112		20.4333	2	0	1.36333	37.3451		20.4333	2	1	1.36333	35.2991
20.45	2	3	1.36444	35.6058		20.45	1	0	1.36444	34.811		20.45	2	0	1.36444	37.3496		20.45	2	2	1.36444	35.2845
20.4667	2	2	1.36556	35.6128		20.4667	2	7	1.36556	34.8017		20.4667	2	0	1.36556	37.3371		20.4667	2	0	1.36556	35.2772
20.4833	2	1	1.36667	35.617		20.4833	2	4	1.36667	34.7867		20.4833	2	2	1.36667	37.3268		20.4833	1	0	1.36667	35.2697
20.5	2	3	1.36778	35.6195		20.5	2	2	1.36778	34.7725		20.5	2	0	1.36778	37.3184		20.5	1	0	1.36778	35.2631
20.5167	2	1	1.36889	35.6222		20.5167	2	1	1.36889	34.7653		20.5167	2	0	1.36889	37.3085		20.5167	1	0	1.36889	35.2632
20.5333	2	0	1.37	35.6221		20.5333	2	3	1.37	34.7688		20.5333	2	0	1.37	37.3011		20.5333	1	0	1.37	35.2647
20.55	2	6	1.37111	35.6334		20.55	2	2	1.37111	34.7808		20.55	2	0	1.37111	37.2882		20.55	1	0	1.37111	35.2614
20.5667	2	7	1.37222	35.6361		20.5667	2	3	1.37222	34.7905		20.5667	2	0	1.37222	37.2774		20.5667	1	0	1.37222	35.2552
20.5833	1	1	1.37333	35.6321		20.5833	2	6	1.37333	34.787		20.5833	2	0	1.37333	37.2702		20.5833	1	0	1.37333	35.2509
20.6	1	0	1.37444	35.6296		20.6	2	2	1.37444	34.7893		20.6	2	0	1.37444	37.2734		20.6	1	0	1.37444	35.2503
20.6167	1	0	1.37556	35.6312		20.6167	2	3	1.37556	34.7958		20.6167	2	0	1.37556	37.2859		20.6167	1	0	1.37556	35.2499
20.6333	1	0	1.37667	35.6295		20.6333	2	1	1.37667	34.8014		20.6333	1	0	1.37667	37.2906		20.6333	1	0	1.37667	35.2526
20.65	1	0	1.37778	35.617		20.65	1	0	1.37778	34.8025		20.65	1	0	1.37778	37.2903		20.65	1	0	1.37778	35.2519
20.6667	1	0	1.37889	35.6096		20.6667	1	0	1.37889	34.8		20.6667	1	0	1.37889	37.2913		20.6667	1	0	1.37889	35.2497
20.6833	1	0	1.38	35.5995		20.6833	1	0	1.38	34.8001		20.6833	1	0	1.38	37.2943		20.6833	0	0	1.38	35.2238
20.7	1	0	1.38111	35.5902		20.7	1	0	1.38111	34.8038		20.7	1	0	1.38111	37.2966		20.7	1	0	1.38111	35.2074
20.7167	1	0	1.38222	35.5908		20.7167	1	0	1.38222	34.806		20.7167	1	0	1.38222	37.2913		20.7167	1	0	1.38222	35.1954
20.7333	1	0	1.38333	35.6058		20.7333	1	0	1.38333	34.8071		20.7333	1	0	1.38333	37.2832		20.7333	1	0	1.38333	35.1824
20.75	0	0	1.38444	35.6141		20.75	1	0	1.38444	34.7989		20.75	1	0	1.38444	37.268		20.75	1	0	1.38444	35.1628
20.7667	0	0	1.38556	35.6052		20.7667	1	0	1.38556	34.7966		20.7667	1	0	1.38556	37.2577		20.7667	1	0	1.38556	35.1488
20.7833	2	0	1.38667	35.5968		20.7833	1	0	1.38667	34.7874		20.7833	1	0	1.38667	37.2588		20.7833	1	0	1.38667	35.1386
20.8	2	0	1.38778	35.5838		20.8	1	0	1.38778	34.7811		20.8	1	0	1.38778	37.2636		20.8	2	0	1.38778	35.1301
20.8167	2	0	1.38889	35.581		20.8167	2	2	1.38889	34.7767		20.8167	1	0	1.38889	37.2623		20.8167	1	0	1.38889	35.1287
20.8333	1	2	1.39	35.5785		20.8333	2	3	1.39	34.7803		20.8333	1	0	1.39	37.2488		20.8333	1	0	1.39	35.1325
20.85	1	0	1.39111	35.5825		20.85	2	0	1.39111	34.7779		20.85	1	0	1.39111	37.2363		20.85	1	0	1.39111	35.128
20.8667	1	0	1.39222	35.5895		20.8667	2	2	1.39222	34.7671		20.8667	1	0	1.39222	37.2295		20.8667	1	0	1.39222	35.1217
20.8833	1	0	1.39333	35.6051		20.8833	2	4	1.39333	34.7637		20.8833	0	0	1.39333	37.2347		20.8833	1	0	1.39333	35.1269
20.9	1	0	1.39444	35.6227		20.9	2	2	1.39444	34.7632		20.9	1	0	1.39444	37.2273		20.9	1	0	1.39444	35.1309
20.9167	1	0	1.39556	35.6347		20.9167	2	7	1.39556	34.7626		20.9167	1	0	1.39556	37.2281		20.9167	0	0	1.39556	35.1158
20.9333	1	0	1.39667	35.6427		20.9333	2	4	1.39667	34.7669		20.9333	1	0	1.39667	37.2199		20.9333	0	0	1.39667	35.1062
20.95	1	0	1.39778	35.6559		20.95	2	5	1.39778	34.7735		20.95	1	0	1.39778	37.2091		20.95	1	0	1.39778	35.0933
20.9667	1	0	1.39889	35.6668		20.9667	2	1	1.39889	34.776		20.9667	1	0	1.39889	37.2023		20.9667	1	0	1.39889	35.0858
20.9833	1	0	1.4	35.676		20.9833	2	6	1.4	34.7787		20.9833	1	0	1.4	37.2029		20.9833	1	0	1.4	35.0775
21	1	0	1.40111	35.686		21	2	8	1.40111	34.7868		21	1	0	1.40111	37.2236		21	1	0	1.40111	35.0761
21.0167	1	0	1.40222	35.6968		21.0167	2	3	1.40222	34.7971		21.0167	1	0	1.40222	37.2416		21.0167	1	0	1.40222	35.0761
21.0333	1	0	1.40333	35.6963		21.0333	2	4	1.40333	34.8061		21.0333	2	0	1.40333	37.2598		21.0333	1	0	1.40333	35.0712
21.05	1	0	1.40444	35.6958		21.05	1	1	1.40444	34.7907		21.05	1	0	1.40444	37.2609		21.05	1	0	1.40444	35.0651
21.0667	2	0	1.40556	35.6957		21.0667	1	0	1.40556	34.7752		21.0667	1	0	1.40556	37.258		21.0667	1	0	1.40556	35.0533
21.0833	1	3	1.40667	35.6935		21.0833	1	0	1.40667	34.7651		21.0833	1	0	1.40667	37.2559		21.0833	1	0	1.40667	35.0407
21.1	1	1	1.40778	35.6974		21.1	1	0	1.40778	34.7612		21.1	2	0	1.40778	37.2519		21.1	1	0	1.40778	35.0362
21.1167	1	0	1.40889	35.7008		21.1167	1	0	1.40889	34.755		21.1167	1	0	1.40889	37.2426		21.1167	1	0	1.40889	35.0357
21.1333	1	0	1.41	35.7065		21.1333	2	8	1.41	34.7613		21.1333	1	0	1.41	37.2414		21.1333	1	0	1.41	35.0313
21.15	1	0	1.41111	35.7142		21.15	2	7	1.41111	34.7717		21.15	0	0	1.41111	37.2346		21.15	1	0	1.41111	35.0183
21.1667	1	0	1.41222	35.7124		21.1667	2	5	1.41222	34.7794		21.1667	1	0	1.41222	37.2358		21.1667	1	0	1.41222	35.0049
21.1833	1	0	1.41333	35.7085		21.1833	2	0	1.41333	34.7811		21.1833	0	0	1.41333	37.2372		21.1833	1	0	1.41333	34.9938
21.2	1	0	1.41444	35.7162		21.2	2	3	1.41444	34.7857		21.2	1	0	1.41444	37.2377		21.2	1	0	1.41444	34.9848
21.2167	0	0	1.41556	35.7244		21.2167	2	4	1.41556	34.7885		21.2167	1	0	1.41556	37.2302		21.2167	1	0	1.41556	34.9846
21.2333	0	0	1.41667	35.7335		21.2333	2	6	1.41667	34.7912		21.2333	1	0	1.41667	37.2236		21.2333	1	0	1.41667	34.9813
21.25	0	0	1.41778	35.7393		21.25	2	3	1.41778	34.7862		21.25	1	0	1.41778	37.2175		21.25	2	0	1.41778	34.9759
21.2667	2	0	1.41889	35.7441		21.2667	1	0	1.41889	34.7809		21.2667	1	0	1.41889	37.216		21.2667	2	0	1.41889	34.9738
21.2833	2	0	1.42	35.7424		21.2833	1	0	1.42	34.7732		21.2833	1	0	1.42	37.2152		21.2833	2	0	1.42	34.9487
21.3	2	0	1.42111	35.7472		21.3	1	0	1.42111	34.7705		21.3	1	0	1.42111	37.214		21.3	2	0	1.42111	34.9253
21.3167	2	0	1.42222	35.7546		21.3167	1	0	1.42222	34.7561		21.3167	1	0	1.42222	37.2008		21.3167	2	0	1.42222	34.9107
21.3333	2	1	1.42333	35.7519		21.3333	1	0	1.42333	34.7532		21.3333	0	0	1.42333	37.2042		21.3333	2	0	1.42333	34.898
21.35	2	3	1.42444	35.7596		21.35	2	3	1.42444	34.7551		21.35	1	0	1.42444	37.2003		21.35	2	0	1.42444	34.8862
21.3667	2	4	1.42556	35.7505		21.3667	1	0	1.42556	34.7609		21.3667	2	1	1.42556	37.1951		21.3667	2	2	1.42556	34.8815
21.3833	2	0	1.42667	35.7353		21.3833	1	0	1.42667	34.7689		21.3833	2	2	1.42667	37.1879		21.3833	2	0	1.42667	34.8767
21.4	2	2	1.42778	35.7216		21.4	1	0	1.42778	34.7856		21.4	2	0	1.42778	37.1837		21.4	2	6	1.42778	34.8698
21.4167	2	1	1.42889	35.7071		21.4167	1	0	1.42889	34.7997		21.4167	2	2	1.42889	37.1831		21.4167	2	0	1.42889	34.8739
21.4333	2	2	1.43	35.7046		21.4333	1	0	1.43	34.8137		21.4333	2	0	1.43	37.1736		21.4333	2	4	1.43	34.878
21.45	2	0	1.43111	35.7146		21.45	1	0	1.43111	34.8241		21.45	2	0	1.43111	37.1671		21.45	2	3	1.43111	34.8753
21.4667	2	0	1.43222	35.7237		21.4667	1	0	1.43222	34.8427		21.4667	2	0	1.43222	37.1684		21.4667	2	2	1.43222	34.875
21.4833	2	0	1.43333	35.7396		21.4833	1	0	1.43333	34.8813		21.4833	2	0	1.43333	37.1585		21.4833	2	5	1.43333	34.8648
21.5	2	1	1.43444	35.7527		21.5	1	0	1.43444	34.9296		21.5	2	3	1.43444	37.1437		21.5	2	1	1.43444	34.8573
21.5167	1	3	1.43556	35.7607		21.5167	1	0	1.43556	34.9711		21.5167	2	7	1.43556	37.1293		21.5167	2	0	1.43556	34.8545
21.5333	1	0	1.43667	35.7621		21.5333	1	0	1.43667	35.0266		21.5333	2	5	1.43667	37.1226		21.5333	2	0	1.43667	34.8559
21.55	1	0	1.43778	35.7651		21.55	1	0	1.43778	35.0817		21.55	2	0	1.43778	37.1256		21.55	2	0	1.43778	34.8593
21.5667	1	0	1.43889	35.7692		21.5667	1	0	1.43889	35.12		21.5667	2	0	1.43889	37.1251		21.5667	2	0	1.43889	34.8624
21.5833	1	0	1.44	35.7765		21.5833	1	0	1.44	35.116		21.5833	2	2	1.44	37.1364		21.5833	2	1	1.44	34.8717
21.6	1	0	1.44111	35.7944		21.6	2	0	1.44111	35.0857		21.6	2	1	1.44111	37.1398		21.6	2	1	1.44111	34.8758
21.6167	1	0	1.44222	35.8079		21.6167	2	3	1.44222	35.0422		21.6167	2	0	1.44222	37.1418		21.6167	2	1	1.44222	34.8739
21.6333	1	0	1.44333	35.805		21.6333	2	2	1.44333	35.002		21.6333	2	0	1.44333	37.1557		21.6333	2	0	1.44333	34.8678
21.65	1	0	1.44444	35.7901		21.65	2	0	1.44444	34.9691		21.65	2	0	1.44444	37.1637		21.65	2	0	1.44444	34.8608
21.6667	1	0	1.44556	35.7797		21.6667	2	2	1.44556	34.9519		21.6667	2	0	1.44556	37.1489		21.6667	2	2	1.44556	34.8435
21.6833	1	0	1.44667	35.771		21.6833	2	0	1.44667	34.9421		21.6833	2	0	1.44667	37.1399		21.6833	2	1	1.44667	34.8303
21.7	1	0	1.44778	35.7645		21.7	2	6	1.44778	34.9322		21.7	2	0	1.44778	37.1427		21.7	2	3	1.44778	34.826
21.7167	1	0	1.44889	35.7659		21.7167	2	3	1.44889	34.9407		21.7167	2	0	1.44889	37.1476		21.7167	2	0	1.44889	34.8335
21.7333	1	0	1.45	35.7559		21.7333	2	2	1.45	34.9734		21.7333	2	0	1.45	37.1468		21.7333	2	0	1.45	34.8312
21.75	1	0	1.45111	35.7502		21.75	2	2	1.45111	35.0185		21.75	2	0	1.45111	37.1552		21.75	2	0	1.45111	34.8117
21.7667	1	0	1.45222	35.7499		21.7667	1	0	1.45222	35.0727		21.7667	1	0	1.45222	37.1522		21.7667	1	0	1.45222	34.7986
21.7833	0	0	1.45333	35.7442		21.7833	1	0	1.45333	35.1309		21.7833	1	0	1.45333	37.1516		21.7833	1	0	1.45333	34.7931
21.8	2	0	1.45444	35.7361		21.8	1	0	1.45444	35.183		21.8	1	0	1.45444	37.1436		21.8	1	0	1.45444	34.7943
21.8167	2	0	1.45556	35.7285		21.8167	1	0	1.45556	35.23		21.8167	1	0	1.45556	37.1482		21.8167	1	0	1.45556	34.7972
21.8333	2	0	1.45667	35.7252		21.8333	1	0	1.45667	35.2755		21.8333	1	0	1.45667	37.155		21.8333	1	0	1.45667	34.798
21.85	2	0	1.45778	35.7207		21.85	1	0	1.45778	35.3157		21.85	1	0	1.45778	37.143		21.85	1	0	1.45778	34.7985
21.8667	2	0	1.45889	35.7148		21.8667	2	0	1.45889	35.3472		21.8667	1	0	1.45889	37.1248		21.8667	1	0	1.45889	34.8076
21.8833	2	0	1.46	35.7244		21.8833	2	0	1.46	35.3678		21.8833	1	0	1.46	37.1225		21.8833	1	0	1.46	34.8093
21.9	2	1	1.46111	35.7328		21.9	2	6	1.46111	35.3798		21.9	1	0	1.46111	37.1257		21.9	1	0	1.46111	34.808
21.9167	2	3	1.46222	35.7441		21.9167	2	5	1.46222	35.3904		21.9167	1	0	1.46222	37.1347		21.9167	1	0	1.46222	34.805
21.9333	2	1	1.46333	35.758		21.9333	2	3	1.46333	35.3956		21.9333	1	0	1.46333	37.1516		21.9333	1	0	1.46333	34.801
21.95	2	0	1.46444	35.7656		21.95	2	5	1.46444	35.3984		21.95	1	0	1.46444	37.1711		21.95	0	0	1.46444	34.8001
21.9667	2	0	1.46556	35.7719		21.9667	2	0	1.46556	35.3986		21.9667	0	0	1.46556	37.1846		21.9667	0	0	1.46556	34.7987
21.9833	2	0	1.46667	35.7816		21.9833	2	9	1.46667	35.4015		21.9833	2	0	1.46667	37.1855		21.9833	1	0	1.46667	34.8028
22	2	0	1.46778	35.7807		22	2	0	1.46778	35.4023		22	2	0	1.46778	37.1809		22	1	0	1.46778	34.8059
22.0167	2	6	1.46889	35.7833		22.0167	2	2	1.46889	35.4059		22.0167	2	0	1.46889	37.1849		22.0167	1	0	1.46889	34.8062
22.0333	2	5	1.47	35.7931		22.0333	2	2	1.47	35.4037		22.0333	2	2	1.47	37.1815		22.0333	1	0	1.47	34.8042
22.05	2	6	1.47111	35.8031		22.05	2	2	1.47111	35.401		22.05	2	0	1.47111	37.1688		22.05	1	0	1.47111	34.8056
22.0667	1	6	1.47222	35.8151		22.0667	2	0	1.47222	35.3982		22.0667	2	0	1.47222	37.1547		22.0667	1	0	1.47222	34.8105
22.0833	1	0	1.47333	35.8237		22.0833	2	2	1.47333	35.3904		22.0833	2	2	1.47333	37.1532		22.0833	2	0	1.47333	34.8188
22.1	1	0	1.47444	35.8291		22.1	2	0	1.47444	35.3899		22.1	2	0	1.47444	37.1574		22.1	2	0	1.47444	34.827
22.1167	1	0	1.47556	35.8381		22.1167	2	0	1.47556	35.3904		22.1167	2	0	1.47556	37.1559		22.1167	2	0	1.47556	34.8246
22.1333	1	0	1.47667	35.8455		22.1333	2	0	1.47667	35.3859		22.1333	2	0	1.47667	37.16		22.1333	2	0	1.47667	34.8088
22.15	1	0	1.47778	35.8525		22.15	2	5	1.47778	35.3812		22.15	2	0	1.47778	37.1665		22.15	2	0	1.47778	34.7917
22.1667	1	0	1.47889	35.8569		22.1667	2	0	1.47889	35.3835		22.1667	2	0	1.47889	37.1612		22.1667	2	2	1.47889	34.782
22.1833	1	0	1.48	35.8319		22.1833	2	0	1.48	35.3606		22.1833	2	0	1.48	37.1657		22.1833	2	2	1.48	34.7754
22.2	1	0	1.48111	35.7947		22.2	2	5	1.48111	35.3196		22.2	2	0	1.48111	37.1661		22.2	2	3	1.48111	34.7756
22.2167	1	0	1.48222	35.76		22.2167	2	0	1.48222	35.2881		22.2167	2	0	1.48222	37.1733		22.2167	2	3	1.48222	34.776
22.2333	1	0	1.48333	35.7241		22.2333	2	0	1.48333	35.2568		22.2333	1	0	1.48333	37.1788		22.2333	2	3	1.48333	34.7822
22.25	1	0	1.48444	35.6977		22.25	2	3	1.48444	35.2213		22.25	1	0	1.48444	37.1856		22.25	2	1	1.48444	34.7906
22.2667	1	0	1.48556	35.6841		22.2667	2	0	1.48556	35.1877		22.2667	1	0	1.48556	37.1864		22.2667	2	1	1.48556	34.7966
22.2833	2	0	1.48667	35.6858		22.2833	2	0	1.48667	35.1546		22.2833	1	0	1.48667	37.1947		22.2833	2	0	1.48667	34.8033
22.3	2	0	1.48778	35.6917		22.3	2	0	1.48778	35.1217		22.3	1	0	1.48778	37.1994		22.3	2	0	1.48778	34.8097
22.3167	2	0	1.48889	35.701		22.3167	2	3	1.48889	35.0945		22.3167	1	0	1.48889	37.1965		22.3167	2	1	1.48889	34.8171
22.3333	2	0	1.49	35.7008		22.3333	2	0	1.49	35.0666		22.3333	1	0	1.49	37.1942		22.3333	2	0	1.49	34.8273
22.35	1	3	1.49111	35.7041		22.35	2	3	1.49111	35.0363		22.35	1	0	1.49111	37.1943		22.35	2	0	1.49111	34.8365
22.3667	1	0	1.49222	35.7152		22.3667	2	0	1.49222	35.0091		22.3667	1	0	1.49222	37.1775		22.3667	2	0	1.49222	34.8436
22.3833	1	0	1.49333	35.7415		22.3833	2	0	1.49333	34.9923		22.3833	1	0	1.49333	37.17		22.3833	1	0	1.49333	34.8477
22.4	1	0	1.49444	35.7638		22.4	2	0	1.49444	34.9835		22.4	1	0	1.49444	37.1548		22.4	1	0	1.49444	34.859
22.4167	1	0	1.49556	35.7721		22.4167	2	0	1.49556	34.9721		22.4167	1	0	1.49556	37.1609		22.4167	1	0	1.49556	34.8912
22.4333	1	0	1.49667	35.7741		22.4333	2	0	1.49667	34.9569		22.4333	1	0	1.49667	37.1759		22.4333	1	0	1.49667	34.9255
22.45	1	0	1.49778	35.7764		22.45	2	1	1.49778	34.9409		22.45	0	0	1.49778	37.1808		22.45	1	0	1.49778	34.9661
22.4667	1	0	1.49889	35.7813		22.4667	2	1	1.49889	34.9224		22.4667	1	0	1.49889	37.1911		22.4667	1	0	1.49889	35.0052
22.4833	2	0	1.5	35.7834		22.4833	2	0	1.5	34.9115		22.4833	1	0	1.5	37.2054		22.4833	1	0	1.5	34.9926
22.5	1	0	1.50111	35.7878		22.5	1	0	1.50111	34.9087		22.5	2	0	1.50111	37.2189		22.5	1	0	1.50111	34.9667
22.5167	1	0	1.50222	35.8028		22.5167	1	0	1.50222	34.914		22.5167	2	1	1.50222	37.2215		22.5167	1	0	1.50222	34.9435
22.5333	1	0	1.50333	35.8175		22.5333	1	0	1.50333	34.9176		22.5333	2	0	1.50333	37.2083		22.5333	1	0	1.50333	34.9301
22.55	2	0	1.50444	35.8352		22.55	1	0	1.50444	34.915		22.55	2	0	1.50444	37.1975		22.55	1	0	1.50444	34.9236
22.5667	2	0	1.50556	35.8435		22.5667	1	0	1.50556	34.9066		22.5667	2	0	1.50556	37.1881		22.5667	1	0	1.50556	34.9057
22.5833	2	1	1.50667	35.841		22.5833	1	0	1.50667	34.9007		22.5833	2	0	1.50667	37.1879		22.5833	1	0	1.50667	34.8963
22.6	2	2	1.50778	35.8419		22.6	1	0	1.50778	34.8915		22.6	2	0	1.50778	37.1886		22.6	0	0	1.50778	34.8946
22.6167	2	3	1.50889	35.8437		22.6167	1	0	1.50889	34.8824		22.6167	2	0	1.50889	37.1799		22.6167	0	0	1.50889	34.8869
22.6333	2	0	1.51	35.8387		22.6333	1	0	1.51	34.8708		22.6333	2	0	1.51	37.1785		22.6333	2	0	1.51	34.8793
22.65	2	2	1.51111	35.841		22.65	1	1	1.51111	34.8488		22.65	2	0	1.51111	37.1774		22.65	2	0	1.51111	34.8749
22.6667	2	0	1.51222	35.8445		22.6667	2	3	1.51222	34.8328		22.6667	2	0	1.51222	37.1673		22.6667	2	0	1.51222	34.867
22.6833	2	0	1.51333	35.8548		22.6833	2	3	1.51333	34.8355		22.6833	2	3	1.51333	37.1656		22.6833	2	0	1.51333	34.8573
22.7	2	1	1.51444	35.8627		22.7	2	2	1.51444	34.8394		22.7	2	9	1.51444	37.1655		22.7	2	1	1.51444	34.852
22.7167	2	2	1.51556	35.8689		22.7167	2	4	1.51556	34.8355		22.7167	2	3	1.51556	37.181		22.7167	2	0	1.51556	34.8508
22.7333	2	0	1.51667	35.8721		22.7333	2	2	1.51667	34.831		22.7333	2	3	1.51667	37.1681		22.7333	2	0	1.51667	34.8496
22.75	2	3	1.51778	35.8799		22.75	2	0	1.51778	34.8325		22.75	2	2	1.51778	37.1556		22.75	1	0	1.51778	34.8487
22.7667	2	6	1.51889	35.8805		22.7667	2	3	1.51889	34.8313		22.7667	2	4	1.51889	37.1538		22.7667	1	0	1.51889	34.845
22.7833	2	3	1.52	35.8752		22.7833	2	0	1.52	34.8282		22.7833	2	0	1.52	37.1511		22.7833	1	0	1.52	34.8438
22.8	2	1	1.52111	35.8696		22.8	2	0	1.52111	34.8279		22.8	2	3	1.52111	37.1619		22.8	1	0	1.52111	34.8413
22.8167	2	0	1.52222	35.8589		22.8167	2	0	1.52222	34.8267		22.8167	2	3	1.52222	37.1617		22.8167	1	0	1.52222	34.8396
22.8333	2	0	1.52333	35.8511		22.8333	2	0	1.52333	34.8196		22.8333	2	4	1.52333	37.1529		22.8333	1	0	1.52333	34.8439
22.85	2	0	1.52444	35.8427		22.85	2	1	1.52444	34.8034		22.85	2	2	1.52444	37.1443		22.85	1	0	1.52444	34.8559
22.8667	2	0	1.52556	35.8298		22.8667	2	0	1.52556	34.7854		22.8667	2	2	1.52556	37.1411		22.8667	0	0	1.52556	34.8537
22.8833	2	1	1.52667	35.8147		22.8833	2	0	1.52667	34.77		22.8833	2	0	1.52667	37.1426		22.8833	1	0	1.52667	34.8379
22.9	2	2	1.52778	35.7945		22.9	2	0	1.52778	34.7572		22.9	2	0	1.52778	37.1401		22.9	1	0	1.52778	34.8167
22.9167	2	2	1.52889	35.7893		22.9167	2	4	1.52889	34.7521		22.9167	2	0	1.52889	37.146		22.9167	1	0	1.52889	34.8074
22.9333	2	0	1.53	35.8		22.9333	2	0	1.53	34.7521		22.9333	2	0	1.53	37.1664		22.9333	1	1	1.53	34.8066
22.95	2	0	1.53111	35.81		22.95	2	5	1.53111	34.7616		22.95	2	0	1.53111	37.1863		22.95	1	0	1.53111	34.8114
22.9667	2	3	1.53222	35.8199		22.9667	2	2	1.53222	34.7682		22.9667	2	0	1.53222	37.1957		22.9667	2	1	1.53222	34.8158
22.9833	2	0	1.53333	35.8269		22.9833	2	0	1.53333	34.7595		22.9833	2	0	1.53333	37.201		22.9833	2	0	1.53333	34.8228
23	2	0	1.53444	35.8333		23	2	0	1.53444	34.7471		23	2	7	1.53444	37.1876		23	2	1	1.53444	34.8272
23.0167	2	3	1.53556	35.8289		23.0167	2	0	1.53556	34.7414		23.0167	2	3	1.53556	37.1625		23.0167	2	2	1.53556	34.8251
23.0333	2	1	1.53667	35.824		23.0333	2	0	1.53667	34.7433		23.0333	2	0	1.53667	37.1427		23.0333	2	4	1.53667	34.8258
23.05	2	4	1.53778	35.8186		23.05	2	0	1.53778	34.7453		23.05	2	2	1.53778	37.1319		23.05	2	0	1.53778	34.8306
23.0667	2	1	1.53889	35.8196		23.0667	2	0	1.53889	34.7488		23.0667	2	0	1.53889	37.129		23.0667	2	0	1.53889	34.8365
23.0833	2	0	1.54	35.8258		23.0833	2	1	1.54	34.7525		23.0833	2	0	1.54	37.1313		23.0833	2	0	1.54	34.8386
23.1	2	0	1.54111	35.8385		23.1	2	2	1.54111	34.7599		23.1	2	1	1.54111	37.1452		23.1	2	0	1.54111	34.8466
23.1167	2	0	1.54222	35.8577		23.1167	2	0	1.54222	34.7648		23.1167	2	1	1.54222	37.1528		23.1167	2	0	1.54222	34.8519
23.1333	2	0	1.54333	35.8775		23.1333	2	0	1.54333	34.7667		23.1333	2	0	1.54333	37.1592		23.1333	2	0	1.54333	34.8486
23.15	2	0	1.54444	35.8824		23.15	2	0	1.54444	34.7705		23.15	2	0	1.54444	37.169		23.15	2	0	1.54444	34.8424
23.1667	2	1	1.54556	35.8764		23.1667	2	0	1.54556	34.7745		23.1667	2	0	1.54556	37.1734		23.1667	2	0	1.54556	34.8378
23.1833	2	0	1.54667	35.8732		23.1833	2	0	1.54667	34.7764		23.1833	2	2	1.54667	37.1881		23.1833	2	0	1.54667	34.8409
23.2	2	0	1.54778	35.8727		23.2	2	0	1.54778	34.7765		23.2	2	3	1.54778	37.1806		23.2	2	0	1.54778	34.8451
23.2167	2	0	1.54889	35.8695		23.2167	1	0	1.54889	34.7792		23.2167	2	3	1.54889	37.1669		23.2167	2	3	1.54889	34.8524
23.2333	2	0	1.55	35.879		23.2333	1	0	1.55	34.7779		23.2333	2	5	1.55	37.1625		23.2333	2	3	1.55	34.8576
23.25	2	0	1.55111	35.8888		23.25	2	0	1.55111	34.7661		23.25	2	2	1.55111	37.1592		23.25	2	7	1.55111	34.8784
23.2667	2	5	1.55222	35.8935		23.2667	1	0	1.55222	34.756		23.2667	2	0	1.55222	37.1608		23.2667	2	1	1.55222	34.9211
23.2833	2	5	1.55333	35.9047		23.2833	1	0	1.55333	34.7589		23.2833	2	3	1.55333	37.1628		23.2833	2	2	1.55333	34.9689
23.3	2	1	1.55444	35.9066		23.3	1	0	1.55444	34.7564		23.3	2	0	1.55444	37.1699		23.3	2	4	1.55444	35.0255
23.3167	2	1	1.55556	35.9107		23.3167	1	0	1.55556	34.7596		23.3167	2	0	1.55556	37.1762		23.3167	2	1	1.55556	35.0894
23.3333	2	0	1.55667	35.9086		23.3333	1	0	1.55667	34.769		23.3333	2	0	1.55667	37.1897		23.3333	2	0	1.55667	35.1426
23.35	2	0	1.55778	35.901		23.35	1	0	1.55778	34.7832		23.35	2	2	1.55778	37.1915		23.35	2	0	1.55778	35.1878
23.3667	2	3	1.55889	35.9009		23.3667	1	0	1.55889	34.7977		23.3667	2	0	1.55889	37.1985		23.3667	2	0	1.55889	35.2285
23.3833	1	0	1.56	35.8998		23.3833	1	0	1.56	34.8036		23.3833	2	0	1.56	37.2099		23.3833	2	0	1.56	35.2619
23.4	1	0	1.56111	35.898		23.4	1	0	1.56111	34.8127		23.4	2	0	1.56111	37.2041		23.4	2	1	1.56111	35.2888
23.4167	1	0	1.56222	35.9039		23.4167	1	0	1.56222	34.8159		23.4167	2	1	1.56222	37.181		23.4167	2	1	1.56222	35.28
23.4333	1	0	1.56333	35.9004		23.4333	1	0	1.56333	34.8124		23.4333	2	1	1.56333	37.164		23.4333	1	0	1.56333	35.2468
23.45	1	0	1.56444	35.8919		23.45	1	0	1.56444	34.8118		23.45	2	0	1.56444	37.1532		23.45	1	0	1.56444	35.2039
23.4667	1	0	1.56556	35.8792		23.4667	1	0	1.56556	34.8064		23.4667	2	0	1.56556	37.1457		23.4667	1	0	1.56556	35.1646
23.4833	1	0	1.56667	35.8727		23.4833	1	0	1.56667	34.7992		23.4833	1	0	1.56667	37.1594		23.4833	1	0	1.56667	35.1272
23.5	1	0	1.56778	35.8721		23.5	1	0	1.56778	34.7978		23.5	1	0	1.56778	37.1641		23.5	1	0	1.56778	35.0898
23.5167	1	0	1.56889	35.8732		23.5167	1	0	1.56889	34.7986		23.5167	1	0	1.56889	37.155		23.5167	1	0	1.56889	35.0658
23.5333	1	0	1.57	35.8779		23.5333	1	0	1.57	34.7963		23.5333	1	0	1.57	37.1514		23.5333	1	0	1.57	35.0482
23.55	1	0	1.57111	35.8771		23.55	2	0	1.57111	34.7949		23.55	1	0	1.57111	37.1494		23.55	1	0	1.57111	35.0297
23.5667	2	0	1.57222	35.8732		23.5667	2	0	1.57222	34.7954		23.5667	1	0	1.57222	37.161		23.5667	1	1	1.57222	35.0166
23.5833	2	0	1.57333	35.867		23.5833	2	1	1.57333	34.7968		23.5833	2	0	1.57333	37.163		23.5833	1	0	1.57333	34.9994
23.6	2	0	1.57444	35.8593		23.6	2	2	1.57444	34.7882		23.6	2	3	1.57444	37.1691		23.6	1	0	1.57444	34.984
23.6167	2	0	1.57556	35.8428		23.6167	2	1	1.57556	34.7828		23.6167	2	0	1.57556	37.1696		23.6167	1	0	1.57556	34.9767
23.6333	2	0	1.57667	35.8301		23.6333	2	0	1.57667	34.787		23.6333	2	0	1.57667	37.1745		23.6333	1	0	1.57667	34.9715
23.65	2	1	1.57778	35.8217		23.65	2	3	1.57778	34.7815		23.65	2	0	1.57778	37.1769		23.65	1	0	1.57778	34.9683
23.6667	2	0	1.57889	35.8182		23.6667	2	4	1.57889	34.7575		23.6667	2	1	1.57889	37.1852		23.6667	1	0	1.57889	34.9614
23.6833	2	0	1.58	35.8184		23.6833	2	4	1.58	34.7398		23.6833	2	3	1.58	37.1913		23.6833	1	0	1.58	34.9559
23.7	2	0	1.58111	35.8222		23.7	2	0	1.58111	34.7249		23.7	2	0	1.58111	37.2017		23.7	1	0	1.58111	34.9448
23.7167	2	0	1.58222	35.8324		23.7167	2	0	1.58222	34.712		23.7167	2	0	1.58222	37.2194		23.7167	1	0	1.58222	34.945
23.7333	2	0	1.58333	35.8458		23.7333	2	1	1.58333	34.7067		23.7333	2	0	1.58333	37.2205		23.7333	1	0	1.58333	34.9496
23.75	2	2	1.58444	35.8578		23.75	2	1	1.58444	34.7203		23.75	2	1	1.58444	37.2102		23.75	1	3	1.58444	34.9425
23.7667	2	0	1.58556	35.8779		23.7667	2	0	1.58556	34.7335		23.7667	2	0	1.58556	37.2013		23.7667	1	0	1.58556	34.9332
23.7833	2	0	1.58667	35.886		23.7833	2	5	1.58667	34.7488		23.7833	2	4	1.58667	37.2138		23.7833	1	0	1.58667	34.9244
23.8	2	0	1.58778	35.8998		23.8	2	2	1.58778	34.7633		23.8	2	0	1.58778	37.2131		23.8	1	0	1.58778	34.9193
23.8167	2	0	1.58889	35.9036		23.8167	2	10	1.58889	34.7732		23.8167	2	0	1.58889	37.2072		23.8167	1	0	1.58889	34.9161
23.8333	2	0	1.59	35.898		23.8333	2	1	1.59	34.7829		23.8333	1	0	1.59	37.2218		23.8333	1	0	1.59	34.9192
23.85	2	0	1.59111	35.8868		23.85	2	0	1.59111	34.7971		23.85	1	0	1.59111	37.2345		23.85	1	0	1.59111	34.9218
23.8667	1	0	1.59222	35.8764		23.8667	2	1	1.59222	34.8097		23.8667	1	0	1.59222	37.2378		23.8667	1	0	1.59222	34.9191
23.8833	1	0	1.59333	35.8621		23.8833	2	0	1.59333	34.8207		23.8833	1	0	1.59333	37.2423		23.8833	1	0	1.59333	34.9212
23.9	1	0	1.59444	35.8446		23.9	2	0	1.59444	34.8301		23.9	1	0	1.59444	37.2419		23.9	0	0	1.59444	34.9267
23.9167	1	0	1.59556	35.8342		23.9167	2	0	1.59556	34.8354		23.9167	1	0	1.59556	37.2336		23.9167	0	0	1.59556	34.9292
23.9333	0	0	1.59667	35.8216		23.9333	2	2	1.59667	34.8488		23.9333	1	0	1.59667	37.2315		23.9333	2	0	1.59667	34.9342
23.95	0	0	1.59778	35.8188		23.95	2	1	1.59778	34.8636		23.95	1	0	1.59778	37.2332		23.95	1	0	1.59778	34.95
23.9667	2	0	1.59889	35.8082		23.9667	2	1	1.59889	34.8807		23.9667	1	0	1.59889	37.2404		23.9667	1	1	1.59889	34.9786
		1	1.6	35.8043		23.9833	2	4	1.6	34.8957		23.9833	1	0	1.6	37.2449		23.9833	2	0	1.6	35.0147
			1.60111	35.809					1.60111	34.9077					1.60111	37.2459					1.60111	35.0495
			1.60222	35.8199					1.60222	34.916					1.60222	37.2447					1.60222	35.0867
			1.60333	35.8274					1.60333	34.9251					1.60333	37.2414					1.60333	35.1234
			1.60444	35.84					1.60444	34.9336					1.60444	37.2414					1.60444	35.1584
			1.60556	35.8604					1.60556	34.945					1.60556	37.2458					1.60556	35.1986
			1.60667	35.8717					1.60667	34.9576					1.60667	37.2381					1.60667	35.2352
			1.60778	35.8806					1.60778	34.9773					1.60778	37.2377					1.60778	35.24
			1.60889	35.8941					1.60889	35.0049					1.60889	37.2501					1.60889	35.2102
			1.61	35.9027					1.61	35.0232					1.61	37.2598					1.61	35.1762
			1.61111	35.8971					1.61111	35.0347					1.61111	37.2634					1.61111	35.1396
			1.61222	35.9019					1.61222	35.0468					1.61222	37.2737					1.61222	35.1019
			1.61333	35.9029					1.61333	35.057					1.61333	37.2827					1.61333	35.065
			1.61444	35.9131					1.61444	35.0692					1.61444	37.2965					1.61444	35.0436
			1.61556	35.9168					1.61556	35.0813					1.61556	37.3074					1.61556	35.0271
			1.61667	35.917					1.61667	35.0921					1.61667	37.3302					1.61667	35.0053
			1.61778	35.9138					1.61778	35.1063					1.61778	37.3373					1.61778	34.9792
			1.61889	35.8969					1.61889	35.122					1.61889	37.3558					1.61889	34.9599
			1.62	35.8885					1.62	35.127					1.62	37.3629					1.62	34.9438
			1.62111	35.8799					1.62111	35.1324					1.62111	37.3562					1.62111	34.9372
			1.62222	35.8795					1.62222	35.1368					1.62222	37.3441					1.62222	34.9306
			1.62333	35.8862					1.62333	35.1332					1.62333	37.331					1.62333	34.9228
			1.62444	35.8844					1.62444	35.1345					1.62444	37.3172					1.62444	34.9211
			1.62556	35.8792					1.62556	35.1393					1.62556	37.3093					1.62556	34.9221
			1.62667	35.8738					1.62667	35.1419					1.62667	37.309					1.62667	34.9259
			1.62778	35.8749					1.62778	35.1435					1.62778	37.3189					1.62778	34.9276
			1.62889	35.8824					1.62889	35.1432					1.62889	37.3146					1.62889	34.9235
			1.63	35.8849					1.63	35.1441					1.63	37.3206					1.63	34.9173
			1.63111	35.8877					1.63111	35.16					1.63111	37.3253					1.63111	34.9106
			1.63222	35.8902					1.63222	35.1631					1.63222	37.3313					1.63222	34.9099
			1.63333	35.901					1.63333	35.1647					1.63333	37.336					1.63333	34.9151
			1.63444	35.9134					1.63444	35.1695					1.63444	37.34					1.63444	34.9125
			1.63556	35.9226					1.63556	35.1709					1.63556	37.3285					1.63556	34.8972
			1.63667	35.9284					1.63667	35.1709					1.63667	37.3209					1.63667	34.8868
			1.63778	35.9286					1.63778	35.1666					1.63778	37.3242					1.63778	34.874
			1.63889	35.9351					1.63889	35.1581					1.63889	37.3255					1.63889	34.8657
			1.64	35.9474					1.64	35.1484					1.64	37.3323					1.64	34.8579
			1.64111	35.944					1.64111	35.1397					1.64111	37.3349					1.64111	34.8483
			1.64222	35.9363					1.64222	35.1308					1.64222	37.3336					1.64222	34.8461
			1.64333	35.9337					1.64333	35.1233					1.64333	37.3362					1.64333	34.8502
			1.64444	35.9296					1.64444	35.1138					1.64444	37.3326					1.64444	34.8512
			1.64556	35.9194					1.64556	35.1041					1.64556	37.3254					1.64556	34.845
			1.64667	35.902					1.64667	35.0969					1.64667	37.3177					1.64667	34.8419
			1.64778	35.8825					1.64778	35.0966					1.64778	37.3198					1.64778	34.8351
			1.64889	35.8656					1.64889	35.0991					1.64889	37.3211					1.64889	34.8272
			1.65	35.86					1.65	35.1026					1.65	37.3273					1.65	34.8242
			1.65111	35.8622					1.65111	35.0994					1.65111	37.3338					1.65111	34.8237
			1.65222	35.8648					1.65222	35.1008					1.65222	37.3442					1.65222	34.825
			1.65333	35.8736					1.65333	35.0927					1.65333	37.352					1.65333	34.8223
			1.65444	35.8799					1.65444	35.0778					1.65444	37.3519					1.65444	34.8195
			1.65556	35.8937					1.65556	35.075					1.65556	37.3601					1.65556	34.821
			1.65667	35.8984					1.65667	35.0719					1.65667	37.357					1.65667	34.803
			1.65778	35.9045					1.65778	35.0605					1.65778	37.3509					1.65778	34.7842
			1.65889	35.9101					1.65889	35.0407					1.65889	37.3571					1.65889	34.7781
			1.66	35.9124					1.66	35.0354					1.66	37.3446					1.66	34.783
			1.66111	35.9023					1.66111	35.0349					1.66111	37.3383					1.66111	34.7787
			1.66222	35.8924					1.66222	35.048					1.66222	37.3311					1.66222	34.7779
			1.66333	35.889					1.66333	35.0604					1.66333	37.3246					1.66333	34.797
			1.66444	35.8791					1.66444	35.0813					1.66444	37.3105					1.66444	34.8106
			1.66556	35.861					1.66556	35.1013					1.66556	37.3128					1.66556	34.8213
			1.66667	35.8445					1.66667	35.1134					1.66667	37.3102					1.66667	34.8203
			1.66778	35.8339					1.66778	35.1233					1.66778	37.3079					1.66778	34.8162
			1.66889	35.809					1.66889	35.1307					1.66889	37.3014					1.66889	34.8136
			1.67	35.7959					1.67	35.1402					1.67	37.3032					1.67	34.8128
			1.67111	35.7959					1.67111	35.1565					1.67111	37.3066					1.67111	34.8098
			1.67222	35.7893					1.67222	35.1601					1.67222	37.2937					1.67222	34.8071
			1.67333	35.7784					1.67333	35.1657					1.67333	37.2934					1.67333	34.8079
			1.67444	35.7691					1.67444	35.1807					1.67444	37.3249					1.67444	34.7981
			1.67556	35.7576					1.67556	35.1977					1.67556	37.3653					1.67556	34.7871
			1.67667	35.7494					1.67667	35.2048					1.67667	37.3999					1.67667	34.7806
			1.67778	35.7427					1.67778	35.2066					1.67778	37.4392					1.67778	34.777
			1.67889	35.7349					1.67889	35.182					1.67889	37.4886					1.67889	34.7785
			1.68	35.7248					1.68	35.1632					1.68	37.5287					1.68	34.7823
			1.68111	35.7136					1.68111	35.1449					1.68111	37.5312					1.68111	34.7834
			1.68222	35.6999					1.68222	35.1196					1.68222	37.5322					1.68222	34.7867
			1.68333	35.6836					1.68333	35.1033					1.68333	37.5413					1.68333	34.7992
			1.68444	35.6701					1.68444	35.0893					1.68444	37.5638					1.68444	34.8075
			1.68556	35.6567					1.68556	35.077					1.68556	37.5763					1.68556	34.8106
			1.68667	35.6317					1.68667	35.0679					1.68667	37.5936					1.68667	34.8147
			1.68778	35.6119					1.68778	35.0645					1.68778	37.62					1.68778	34.8364
			1.68889	35.5983					1.68889	35.066					1.68889	37.6512					1.68889	34.8903
			1.69	35.5891					1.69	35.0574					1.69	37.6389					1.69	34.9545
			1.69111	35.5829					1.69111	35.0528					1.69111	37.6161					1.69111	35.0084
			1.69222	35.5736					1.69222	35.0455					1.69222	37.5952					1.69222	35.0604
			1.69333	35.5598					1.69333	35.042					1.69333	37.5612					1.69333	35.1063
			1.69444	35.5434					1.69444	35.0453					1.69444	37.5441					1.69444	35.1491
			1.69556	35.5251					1.69556	35.0301					1.69556	37.5392					1.69556	35.1937
			1.69667	35.5089					1.69667	35.0173					1.69667	37.535					1.69667	35.2305
			1.69778	35.4943					1.69778	35.0104					1.69778	37.5271					1.69778	35.2578
			1.69889	35.4839					1.69889	35.0125					1.69889	37.5091					1.69889	35.2836
			1.7	35.4673					1.7	35.0121					1.7	37.5027					1.7	35.3062
			1.70111	35.4533					1.70111	35.0057					1.70111	37.4906					1.70111	35.3251
			1.70222	35.4429					1.70222	35.0072					1.70222	37.4806					1.70222	35.3378
			1.70333	35.4356					1.70333	34.9955					1.70333	37.4709					1.70333	35.346
			1.70444	35.4336					1.70444	34.9805					1.70444	37.4673					1.70444	35.3496
			1.70556	35.4282					1.70556	34.9796					1.70556	37.4805					1.70556	35.3499
			1.70667	35.4128					1.70667	34.9743					1.70667	37.492					1.70667	35.3507
			1.70778	35.3948					1.70778	34.9714					1.70778	37.489					1.70778	35.3496
			1.70889	35.38					1.70889	34.9626					1.70889	37.4839					1.70889	35.3525
			1.71	35.3625					1.71	34.9449					1.71	37.492					1.71	35.351
			1.71111	35.3442					1.71111	34.9337					1.71111	37.4971					1.71111	35.3448
			1.71222	35.3315					1.71222	34.9198					1.71222	37.4866					1.71222	35.3377
			1.71333	35.322					1.71333	34.9088					1.71333	37.4894					1.71333	35.3333
			1.71444	35.32					1.71444	34.8967					1.71444	37.4802					1.71444	35.327
			1.71556	35.3206					1.71556	34.8846					1.71556	37.4542					1.71556	35.3181
			1.71667	35.3206					1.71667	34.8782					1.71667	37.4351					1.71667	35.3096
			1.71778	35.3157					1.71778	34.8747					1.71778	37.4251					1.71778	35.2988
			1.71889	35.3082					1.71889	34.8686					1.71889	37.4095					1.71889	35.2965
			1.72	35.3022					1.72	34.8482					1.72	37.4066					1.72	35.2917
			1.72111	35.2937					1.72111	34.8293					1.72111	37.4112					1.72111	35.2885
			1.72222	35.2638					1.72222	34.8124					1.72222	37.4151					1.72222	35.2869
			1.72333	35.2485					1.72333	34.802					1.72333	37.4345					1.72333	35.2842
			1.72444	35.2291					1.72444	34.7955					1.72444	37.4567					1.72444	35.287
			1.72556	35.2156					1.72556	34.7882					1.72556	37.4737					1.72556	35.2856
			1.72667	35.2116					1.72667	34.7803					1.72667	37.4968					1.72667	35.2797
			1.72778	35.212					1.72778	34.7763					1.72778	37.5115					1.72778	35.278
			1.72889	35.2118					1.72889	34.7701					1.72889	37.5254					1.72889	35.2697
			1.73	35.2102					1.73	34.7648					1.73	37.5453					1.73	35.2656
			1.73111	35.2069					1.73111	34.7612					1.73111	37.541					1.73111	35.2325
			1.73222	35.2008					1.73222	34.7545					1.73222	37.5318					1.73222	35.2026
			1.73333	35.1944					1.73333	34.7425					1.73333	37.5155					1.73333	35.176
			1.73444	35.1872					1.73444	34.7266					1.73444	37.4974					1.73444	35.1372
			1.73556	35.1758					1.73556	34.7082					1.73556	37.4977					1.73556	35.0955
			1.73667	35.1549					1.73667	34.6925					1.73667	37.4744					1.73667	35.0581
			1.73778	35.1333					1.73778	34.6791					1.73778	37.4516					1.73778	35.0244
			1.73889	35.1179					1.73889	34.6731					1.73889	37.4472					1.73889	34.9934
			1.74	35.1055					1.74	34.6707					1.74	37.443					1.74	34.9658
			1.74111	35.1002					1.74111	34.6714					1.74111	37.4396					1.74111	34.9426
			1.74222	35.0934					1.74222	34.6646					1.74222	37.437					1.74222	34.9303
			1.74333	35.076					1.74333	34.6579					1.74333	37.4399					1.74333	34.9245
			1.74444	35.0672					1.74444	34.6568					1.74444	37.4315					1.74444	34.9247
			1.74556	35.0663					1.74556	34.649					1.74556	37.4266					1.74556	34.9184
			1.74667	35.0679					1.74667	34.6394					1.74667	37.4335					1.74667	34.9101
			1.74778	35.0692					1.74778	34.6377					1.74778	37.4451					1.74778	34.8985
			1.74889	35.0699					1.74889	34.6363					1.74889	37.4424					1.74889	34.8948
			1.75	35.0714					1.75	34.6319					1.75	37.4399					1.75	34.8952
			1.75111	35.0741					1.75111	34.6266					1.75111	37.432					1.75111	34.8926
			1.75222	35.07					1.75222	34.6221					1.75222	37.4269					1.75222	34.8771
			1.75333	35.0571					1.75333	34.6159					1.75333	37.4178					1.75333	34.8641
			1.75444	35.0494					1.75444	34.6054					1.75444	37.4136					1.75444	34.8498
			1.75556	35.0401					1.75556	34.6018					1.75556	37.417					1.75556	34.8355
			1.75667	35.0359					1.75667	34.5984					1.75667	37.4147					1.75667	34.8256
			1.75778	35.0344					1.75778	34.5914					1.75778	37.4014					1.75778	34.8195
			1.75889	35.0296					1.75889	34.5741					1.75889	37.3903					1.75889	34.8146
			1.76	35.0238					1.76	34.5577					1.76	37.3697					1.76	34.8122
			1.76111	35.0191					1.76111	34.5495					1.76111	37.3455					1.76111	34.8101
			1.76222	35.0149					1.76222	34.5464					1.76222	37.3355					1.76222	34.796
			1.76333	35.0126					1.76333	34.5486					1.76333	37.3267					1.76333	34.7807
			1.76444	35.0174					1.76444	34.5542					1.76444	37.3215					1.76444	34.769
			1.76556	35.0286					1.76556	34.5551					1.76556	37.311					1.76556	34.7543
			1.76667	35.0341					1.76667	34.5569					1.76667	37.3079					1.76667	34.7499
			1.76778	35.0375					1.76778	34.5612					1.76778	37.2978					1.76778	34.751
			1.76889	35.0222					1.76889	34.5704					1.76889	37.2851					1.76889	34.7609
			1.77	34.9958					1.77	34.5757					1.77	37.2788					1.77	34.7643
			1.77111	34.9791					1.77111	34.5692					1.77111	37.2756					1.77111	34.7692
			1.77222	34.9659					1.77222	34.5619					1.77222	37.2725					1.77222	34.7738
			1.77333	34.9599					1.77333	34.5563					1.77333	37.277					1.77333	34.7704
			1.77444	34.9584					1.77444	34.5546					1.77444	37.2657					1.77444	34.764
			1.77556	34.9538					1.77556	34.5591					1.77556	37.2512					1.77556	34.7575
			1.77667	34.9451					1.77667	34.5651					1.77667	37.2479					1.77667	34.7524
			1.77778	34.9388					1.77778	34.5653					1.77778	37.2461					1.77778	34.7498
			1.77889	34.9377					1.77889	34.5624					1.77889	37.2407					1.77889	34.7467
			1.78	34.9382					1.78	34.558					1.78	37.2343					1.78	34.7432
			1.78111	34.933					1.78111	34.5575					1.78111	37.2265					1.78111	34.7348
			1.78222	34.9218					1.78222	34.5595					1.78222	37.2201					1.78222	34.7306
			1.78333	34.9094					1.78333	34.5599					1.78333	37.2298					1.78333	34.7263
			1.78444	34.8943					1.78444	34.5579					1.78444	37.237					1.78444	34.7248
			1.78556	34.8861					1.78556	34.554					1.78556	37.2375					1.78556	34.7279
			1.78667	34.8794					1.78667	34.5492					1.78667	37.2408					1.78667	34.7336
			1.78778	34.8789					1.78778	34.5468					1.78778	37.2353					1.78778	34.7385
			1.78889	34.8791					1.78889	34.5458					1.78889	37.2386					1.78889	34.7399
			1.79	34.8687					1.79	34.548					1.79	37.2342					1.79	34.7402
			1.79111	34.8565					1.79111	34.5487					1.79111	37.2264					1.79111	34.7408
			1.79222	34.8463					1.79222	34.553					1.79222	37.2196					1.79222	34.7389
			1.79333	34.8363					1.79333	34.5491					1.79333	37.2238					1.79333	34.7428
			1.79444	34.8267					1.79444	34.545					1.79444	37.2306					1.79444	34.7498
			1.79556	34.813					1.79556	34.5423					1.79556	37.2204					1.79556	34.7486
			1.79667	34.8021					1.79667	34.5424					1.79667	37.2084					1.79667	34.7409
			1.79778	34.791					1.79778	34.5393					1.79778	37.2191					1.79778	34.7306
			1.79889	34.7854					1.79889	34.5362					1.79889	37.2221					1.79889	34.7134
			1.8	34.7816					1.8	34.5343					1.8	37.2274					1.8	34.7092
			1.80111	34.7765					1.80111	34.5328					1.80111	37.2431					1.80111	34.7121
			1.80222	34.775					1.80222	34.5243					1.80222	37.2469					1.80222	34.7157
			1.80333	34.7742					1.80333	34.5198					1.80333	37.2558					1.80333	34.7235
			1.80444	34.7708					1.80444	34.5154					1.80444	37.2664					1.80444	34.7319
			1.80556	34.7722					1.80556	34.5092					1.80556	37.2736					1.80556	34.7351
			1.80667	34.7724					1.80667	34.5115					1.80667	37.2694					1.80667	34.7379
			1.80778	34.7674					1.80778	34.5175					1.80778	37.2641					1.80778	34.7429
			1.80889	34.7479					1.80889	34.523					1.80889	37.2645					1.80889	34.756
			1.81	34.7272					1.81	34.5297					1.81	37.2676					1.81	34.7644
			1.81111	34.7182					1.81111	34.5348					1.81111	37.2699					1.81111	34.769
			1.81222	34.7111					1.81222	34.5369					1.81222	37.2713					1.81222	34.7658
			1.81333	34.7079					1.81333	34.5353					1.81333	37.2714					1.81333	34.7474
			1.81444	34.7103					1.81444	34.5217					1.81444	37.2786					1.81444	34.735
			1.81556	34.7131					1.81556	34.5022					1.81556	37.2895					1.81556	34.7333
			1.81667	34.7136					1.81667	34.4961					1.81667	37.2825					1.81667	34.7383
			1.81778	34.7121					1.81778	34.4961					1.81778	37.2791					1.81778	34.7397
			1.81889	34.7114					1.81889	34.5001					1.81889	37.2797					1.81889	34.734
			1.82	34.7124					1.82	34.5075					1.82	37.2886					1.82	34.739
			1.82111	34.7142					1.82111	34.5148					1.82111	37.2888					1.82111	34.7477
			1.82222	34.7208					1.82222	34.5224					1.82222	37.2773					1.82222	34.7545
			1.82333	34.7329					1.82333	34.5301					1.82333	37.2693					1.82333	34.7657
			1.82444	34.7438					1.82444	34.5343					1.82444	37.2597					1.82444	34.7803
			1.82556	34.7361					1.82556	34.5397					1.82556	37.2481					1.82556	34.787
			1.82667	34.7164					1.82667	34.5482					1.82667	37.2358					1.82667	34.7819
			1.82778	34.7005					1.82778	34.5576					1.82778	37.2364					1.82778	34.7768
			1.82889	34.6922					1.82889	34.5698					1.82889	37.2496					1.82889	34.7622
			1.83	34.6893					1.83	34.584					1.83	37.2478					1.83	34.7526
			1.83111	34.6893					1.83111	34.6002					1.83111	37.2499					1.83111	34.7532
			1.83222	34.6939					1.83222	34.6315					1.83222	37.2531					1.83222	34.759
			1.83333	34.693					1.83333	34.6843					1.83333	37.2605					1.83333	34.7543
			1.83444	34.6956					1.83444	34.7431					1.83444	37.257					1.83444	34.7517
			1.83556	34.6978					1.83556	34.7966					1.83556	37.2338					1.83556	34.7614
			1.83667	34.6976					1.83667	34.8552					1.83667	37.2149					1.83667	34.7707
			1.83778	34.6951					1.83778	34.9078					1.83778	37.2082					1.83778	34.7757
			1.83889	34.6856					1.83889	34.9548					1.83889	37.2064					1.83889	34.7827
			1.84	34.6782					1.84	34.9866					1.84	37.1986					1.84	34.7875
			1.84111	34.6779					1.84111	34.9693					1.84111	37.1953					1.84111	34.7898
			1.84222	34.6835					1.84222	34.9317					1.84222	37.2112					1.84222	34.7885
			1.84333	34.6837					1.84333	34.9014					1.84333	37.223					1.84333	34.7902
			1.84444	34.6767					1.84444	34.8644					1.84444	37.2402					1.84444	34.7947
			1.84556	34.6726					1.84556	34.8372					1.84556	37.2605					1.84556	34.7968
			1.84667	34.6751					1.84667	34.8067					1.84667	37.2468					1.84667	34.7986
			1.84778	34.6787					1.84778	34.7852					1.84778	37.2304					1.84778	34.7858
			1.84889	34.6871					1.84889	34.77					1.84889	37.2229					1.84889	34.7731
			1.85	34.7003					1.85	34.7649					1.85	37.2121					1.85	34.7706
			1.85111	34.7223					1.85111	34.76					1.85111	37.2077					1.85111	34.7715
			1.85222	34.7478					1.85222	34.7509					1.85222	37.2037					1.85222	34.7691
			1.85333	34.7864					1.85333	34.7433					1.85333	37.1942					1.85333	34.7765
			1.85444	34.8259					1.85444	34.7473					1.85444	37.1948					1.85444	34.7693
			1.85556	34.879					1.85556	34.751					1.85556	37.1884					1.85556	34.7631
			1.85667	34.9364					1.85667	34.7441					1.85667	37.1848					1.85667	34.769
			1.85778	34.9847					1.85778	34.7366					1.85778	37.1971					1.85778	34.772
			1.85889	35.0271					1.85889	34.7315					1.85889	37.2117					1.85889	34.7743
			1.86	35.0703					1.86	34.731					1.86	37.2178					1.86	34.7838
			1.86111	35.1051					1.86111	34.7322					1.86111	37.2196					1.86111	34.7928
			1.86222	35.1283					1.86222	34.74					1.86222	37.2104					1.86222	34.8
			1.86333	35.151					1.86333	34.7506					1.86333	37.2041					1.86333	34.8061
			1.86444	35.1669					1.86444	34.7515					1.86444	37.2104					1.86444	34.8139
			1.86556	35.1794					1.86556	34.7495					1.86556	37.2036					1.86556	34.8138
			1.86667	35.1878					1.86667	34.7509					1.86667	37.1964					1.86667	34.8014
			1.86778	35.1921					1.86778	34.7552					1.86778	37.2002					1.86778	34.7901
			1.86889	35.1956					1.86889	34.7692					1.86889	37.1958					1.86889	34.7804
			1.87	35.1982					1.87	34.7837					1.87	37.1893					1.87	34.7782
			1.87111	35.1964					1.87111	34.7786					1.87111	37.1923					1.87111	34.7779
			1.87222	35.1896					1.87222	34.7633					1.87222	37.2059					1.87222	34.7828
			1.87333	35.1786					1.87333	34.7559					1.87333	37.2205					1.87333	34.7873
			1.87444	35.1701					1.87444	34.7544					1.87444	37.2309					1.87444	34.7924
			1.87556	35.1596					1.87556	34.755					1.87556	37.2396					1.87556	34.8084
			1.87667	35.1477					1.87667	34.754					1.87667	37.2376					1.87667	34.8198
			1.87778	35.14					1.87778	34.7582					1.87778	37.2428					1.87778	34.8493
			1.87889	35.1382					1.87889	34.7607					1.87889	37.2485					1.87889	34.8771
			1.88	35.139					1.88	34.7659					1.88	37.2363					1.88	34.9021
			1.88111	35.1362					1.88111	34.7752					1.88111	37.2365					1.88111	34.92
			1.88222	35.1338					1.88222	34.787					1.88222	37.2339					1.88222	34.907
			1.88333	35.1307					1.88333	34.7938					1.88333	37.2237					1.88333	34.8892
			1.88444	35.1281					1.88444	34.7974					1.88444	37.2235					1.88444	34.877
			1.88556	35.1224					1.88556	34.8088					1.88556	37.2251					1.88556	34.8594
			1.88667	35.1178					1.88667	34.8061					1.88667	37.2376					1.88667	34.8441
			1.88778	35.099					1.88778	34.7814					1.88778	37.2453					1.88778	34.8316
			1.88889	35.0588					1.88889	34.7716					1.88889	37.2567					1.88889	34.8273
			1.89	35.0213					1.89	34.7676					1.89	37.2645					1.89	34.8282
			1.89111	34.9853					1.89111	34.7698					1.89111	37.2549					1.89111	34.8238
			1.89222	34.9551					1.89222	34.769					1.89222	37.253					1.89222	34.8241
			1.89333	34.9327					1.89333	34.7711					1.89333	37.2555					1.89333	34.8239
			1.89444	34.9137					1.89444	34.7818					1.89444	37.255					1.89444	34.8273
			1.89556	34.8933					1.89556	34.7933					1.89556	37.2612					1.89556	34.8221
			1.89667	34.8821					1.89667	34.8056					1.89667	37.2448					1.89667	34.816
			1.89778	34.8705					1.89778	34.8208					1.89778	37.2087					1.89778	34.808
			1.89889	34.8608					1.89889	34.8445					1.89889	37.1951					1.89889	34.7957
			1.9	34.8488					1.9	34.8764					1.9	37.1822					1.9	34.7932
			1.90111	34.8385					1.90111	34.9119					1.90111	37.165					1.90111	34.7868
			1.90222	34.837					1.90222	34.947					1.90222	37.1573					1.90222	34.7792
			1.90333	34.8391					1.90333	34.9924					1.90333	37.1593					1.90333	34.769
			1.90444	34.8355					1.90444	35.0363					1.90444	37.1547					1.90444	34.7581
			1.90556	34.8154					1.90556	35.0673					1.90556	37.1424					1.90556	34.751
			1.90667	34.809					1.90667	35.1001					1.90667	37.1444					1.90667	34.7596
			1.90778	34.8199					1.90778	35.1388					1.90778	37.1434					1.90778	34.7684
			1.90889	34.827					1.90889	35.1638					1.90889	37.1408					1.90889	34.7786
			1.91	34.824					1.91	35.1451					1.91	37.1429					1.91	34.7832
			1.91111	34.8234					1.91111	35.1049					1.91111	37.1405					1.91111	34.7843
			1.91222	34.8178					1.91222	35.0625					1.91222	37.1422					1.91222	34.7826
			1.91333	34.8119					1.91333	35.0249					1.91333	37.1583					1.91333	34.7779
			1.91444	34.8058					1.91444	34.9886					1.91444	37.1698					1.91444	34.7764
			1.91556	34.7986					1.91556	34.9616					1.91556	37.1925					1.91556	34.7771
			1.91667	34.7928					1.91667	34.9353					1.91667	37.2073					1.91667	34.7728
			1.91778	34.7894					1.91778	34.9162					1.91778	37.2107					1.91778	34.7663
			1.91889	34.7872					1.91889	34.9141					1.91889	37.1991					1.91889	34.759
			1.92	34.7917					1.92	34.917					1.92	37.1854					1.92	34.7502
			1.92111	34.7878					1.92111	34.917					1.92111	37.1735					1.92111	34.7433
			1.92222	34.7882					1.92222	34.9091					1.92222	37.1693					1.92222	34.7364
			1.92333	34.7916					1.92333	34.8968					1.92333	37.162					1.92333	34.7312
			1.92444	34.7948					1.92444	34.8874					1.92444	37.166					1.92444	34.7289
			1.92556	34.7946					1.92556	34.8803					1.92556	37.1692					1.92556	34.729
			1.92667	34.8063					1.92667	34.8718					1.92667	37.1902					1.92667	34.7248
			1.92778	34.8123					1.92778	34.8594					1.92778	37.2015					1.92778	34.7184
			1.92889	34.8143					1.92889	34.8458					1.92889	37.2085					1.92889	34.6968
			1.93	34.813					1.93	34.8403					1.93	37.2091					1.93	34.6892
			1.93111	34.8056					1.93111	34.8361					1.93111	37.207					1.93111	34.6831
			1.93222	34.8049					1.93222	34.8347					1.93222	37.2039					1.93222	34.6698
			1.93333	34.8067					1.93333	34.8279					1.93333	37.2002					1.93333	34.6672
			1.93444	34.8068					1.93444	34.8203					1.93444	37.1928					1.93444	34.6716
			1.93556	34.8104					1.93556	34.8044					1.93556	37.195					1.93556	34.6809
			1.93667	34.8043					1.93667	34.7983					1.93667	37.1871					1.93667	34.6859
			1.93778	34.798					1.93778	34.7966					1.93778	37.1743					1.93778	34.6899
			1.93889	34.7903					1.93889	34.8081					1.93889	37.1647					1.93889	34.6895
			1.94	34.7901					1.94	34.8191					1.94	37.1629					1.94	34.6858
			1.94111	34.7974					1.94111	34.8234					1.94111	37.1559					1.94111	34.6825
			1.94222	34.8044					1.94222	34.8266					1.94222	37.1564					1.94222	34.6803
			1.94333	34.8034					1.94333	34.8344					1.94333	37.1629					1.94333	34.6826
			1.94444	34.8049					1.94444	34.8495					1.94444	37.1661					1.94444	34.6795
			1.94556	34.8073					1.94556	34.86					1.94556	37.1593					1.94556	34.6772
			1.94667	34.8089					1.94667	34.8849					1.94667	37.1676					1.94667	34.6738
			1.94778	34.8115					1.94778	34.9181					1.94778	37.1875					1.94778	34.6654
			1.94889	34.8104					1.94889	34.9513					1.94889	37.2036					1.94889	34.6591
			1.95	34.799					1.95	34.9908					1.95	37.2319					1.95	34.6476
			1.95111	34.7809					1.95111	35.0243					1.95111	37.2569					1.95111	34.6373
			1.95222	34.7623					1.95222	35.0463					1.95222	37.2617					1.95222	34.6272
			1.95333	34.7498					1.95333	35.0635					1.95333	37.2527					1.95333	34.6204
			1.95444	34.7472					1.95444	35.0842					1.95444	37.2503					1.95444	34.6187
			1.95556	34.7555					1.95556	35.093					1.95556	37.2713					1.95556	34.6248
			1.95667	34.7668					1.95667	35.1059					1.95667	37.3013					1.95667	34.6285
			1.95778	34.7772					1.95778	35.1222					1.95778	37.3371					1.95778	34.6355
			1.95889	34.7839					1.95889	35.1241					1.95889	37.3546					1.95889	34.6438
			1.96	34.7809					1.96	35.1318					1.96	37.341					1.96	34.6594
			1.96111	34.7723					1.96111	35.1433					1.96111	37.3267					1.96111	34.6766
			1.96222	34.7665					1.96222	35.143					1.96222	37.3133					1.96222	34.6973
			1.96333	34.7599					1.96333	35.1369					1.96333	37.2999					1.96333	34.7255
			1.96444	34.7572					1.96444	35.1401					1.96444	37.2906					1.96444	34.7642
			1.96556	34.7556					1.96556	35.1537					1.96556	37.2963					1.96556	34.8124
			1.96667	34.7494					1.96667	35.1657					1.96667	37.3063					1.96667	34.8707
			1.96778	34.7395					1.96778	35.1679					1.96778	37.3118					1.96778	34.9139
			1.96889	34.7343					1.96889	35.1803					1.96889	37.3182					1.96889	34.9427
			1.97	34.7349					1.97	35.1937					1.97	37.3278					1.97	34.969
			1.97111	34.7272					1.97111	35.2017					1.97111	37.3276					1.97111	34.9864
			1.97222	34.7122					1.97222	35.2073					1.97222	37.3326					1.97222	34.9945
			1.97333	34.7115					1.97333	35.2017					1.97333	37.338					1.97333	35.0111
			1.97444	34.7099					1.97444	35.2019					1.97444	37.3642					1.97444	35.0226
			1.97556	34.7063					1.97556	35.2088					1.97556	37.3949					1.97556	35.0278
			1.97667	34.7106					1.97667	35.2145					1.97667	37.4264					1.97667	35.0385
			1.97778	34.7077					1.97778	35.2236					1.97778	37.4608					1.97778	35.0512
			1.97889	34.704					1.97889	35.2276					1.97889	37.4909					1.97889	35.0578
			1.98	34.7005					1.98	35.2311					1.98	37.5131					1.98	35.0649
			1.98111	34.6987					1.98111	35.2326					1.98111	37.532					1.98111	35.0723
			1.98222	34.6961					1.98222	35.2324					1.98222	37.5512					1.98222	35.0808
			1.98333	34.6957					1.98333	35.232					1.98333	37.5729					1.98333	35.0946
			1.98444	34.6901					1.98444	35.2263					1.98444	37.5733					1.98444	35.109
			1.98556	34.6859					1.98556	35.2199					1.98556	37.57					1.98556	35.1183
			1.98667	34.6782					1.98667	35.2214					1.98667	37.5684					1.98667	35.1169
			1.98778	34.669					1.98778	35.2232					1.98778	37.5531					1.98778	35.108
			1.98889	34.6635					1.98889	35.2255					1.98889	37.5353					1.98889	35.0687
			1.99	34.6595					1.99	35.2221					1.99	37.533					1.99	35.0212
			1.99111	34.6599					1.99111	35.206					1.99111	37.5339					1.99111	34.9711
			1.99222	34.6606					1.99222	35.1718					1.99222	37.5498					1.99222	34.9217
			1.99333	34.6579					1.99333	35.1432					1.99333	37.5763					1.99333	34.8793
			1.99444	34.6567					1.99444	35.1081					1.99444	37.6001					1.99444	34.8432
			1.99556	34.6524					1.99556	35.0849					1.99556	37.5938					1.99556	34.8105
			1.99667	34.6417					1.99667	35.0645					1.99667	37.5692					1.99667	34.7864
			1.99778	34.6317					1.99778	35.0427					1.99778	37.5367					1.99778	34.774
			1.99889	34.6186					1.99889	35.0222					1.99889	37.5099					1.99889	34.7707
			2	34.6093					2	35.0044					2	37.5166					2	34.7665
			2.00111	34.6073					2.00111	34.9967					2.00111	37.5172					2.00111	34.7655
			2.00222	34.6093					2.00222	34.9851					2.00222	37.5036					2.00222	34.7652
			2.00333	34.5993					2.00333	34.9702					2.00333	37.4963					2.00333	34.766
			2.00444	34.5874					2.00444	34.9614					2.00444	37.4846					2.00444	34.7632
			2.00556	34.5826					2.00556	34.9649					2.00556	37.4698					2.00556	34.7636
			2.00667	34.5804					2.00667	34.9625					2.00667	37.4482					2.00667	34.767
			2.00778	34.5805					2.00778	34.9425					2.00778	37.4441					2.00778	34.7679
			2.00889	34.5834					2.00889	34.9146					2.00889	37.4478					2.00889	34.7655
			2.01	34.592					2.01	34.892					2.01	37.4413					2.01	34.7663
			2.01111	34.5987					2.01111	34.877					2.01111	37.4336					2.01111	34.7698
			2.01222	34.6024					2.01222	34.871					2.01222	37.4191					2.01222	34.7721
			2.01333	34.5945					2.01333	34.8689					2.01333	37.4077					2.01333	34.7763
			2.01444	34.5823					2.01444	34.864					2.01444	37.3944					2.01444	34.7817
			2.01556	34.5771					2.01556	34.8561					2.01556	37.4001					2.01556	34.7864
			2.01667	34.5761					2.01667	34.8455					2.01667	37.4316					2.01667	34.7888
			2.01778	34.5761					2.01778	34.8461					2.01778	37.4719					2.01778	34.7955
			2.01889	34.5782					2.01889	34.8448					2.01889	37.5089					2.01889	34.8014
			2.02	34.5766					2.02	34.8325					2.02	37.5373					2.02	34.8038
			2.02111	34.5742					2.02111	34.8194					2.02111	37.565					2.02111	34.8066
			2.02222	34.58					2.02222	34.8097					2.02222	37.5875					2.02222	34.8187
			2.02333	34.5819					2.02333	34.7978					2.02333	37.613					2.02333	34.8304
			2.02444	34.5892					2.02444	34.7869					2.02444	37.6356					2.02444	34.8391
			2.02556	34.5971					2.02556	34.7785					2.02556	37.6339					2.02556	34.8381
			2.02667	34.5984					2.02667	34.7718					2.02667	37.6121					2.02667	34.8451
			2.02778	34.5872					2.02778	34.7659					2.02778	37.586					2.02778	34.8451
			2.02889	34.5679					2.02889	34.7636					2.02889	37.559					2.02889	34.8458
			2.03	34.5568					2.03	34.7624					2.03	37.5288					2.03	34.8478
			2.03111	34.5575					2.03111	34.7649					2.03111	37.505					2.03111	34.8509
			2.03222	34.5596					2.03222	34.7673					2.03222	37.4857					2.03222	34.8558
			2.03333	34.5671					2.03333	34.753					2.03333	37.469					2.03333	34.8624
			2.03444	34.5789					2.03444	34.7443					2.03444	37.4507					2.03444	34.8666
			2.03556	34.584					2.03556	34.7322					2.03556	37.431					2.03556	34.8684
			2.03667	34.5847					2.03667	34.7117					2.03667	37.4103					2.03667	34.87
			2.03778	34.5834					2.03778	34.6948					2.03778	37.3957					2.03778	34.8676
			2.03889	34.577					2.03889	34.6924					2.03889	37.384					2.03889	34.862
			2.04	34.574					2.04	34.6901					2.04	37.3855					2.04	34.8592
			2.04111	34.5709					2.04111	34.6863					2.04111	37.3797					2.04111	34.8546
			2.04222	34.572					2.04222	34.6922					2.04222	37.383					2.04222	34.8521
			2.04333	34.5766					2.04333	34.7007					2.04333	37.39					2.04333	34.8559
			2.04444	34.5818					2.04444	34.7101					2.04444	37.3839					2.04444	34.8592
			2.04556	34.5861					2.04556	34.7206					2.04556	37.3743					2.04556	34.8628
			2.04667	34.5747					2.04667	34.7332					2.04667	37.3538					2.04667	34.8682
			2.04778	34.5605					2.04778	34.7335					2.04778	37.3323					2.04778	34.8718
			2.04889	34.5395					2.04889	34.7292					2.04889	37.3138					2.04889	34.8872
			2.05	34.5314					2.05	34.7292					2.05	37.3104					2.05	34.9062
			2.05111	34.5368					2.05111	34.7221					2.05111	37.3256					2.05111	34.9145
			2.05222	34.5463					2.05222	34.7164					2.05222	37.3267					2.05222	34.9165
			2.05333	34.5562					2.05333	34.7075					2.05333	37.3316					2.05333	34.9228
			2.05444	34.5687					2.05444	34.7015					2.05444	37.3296					2.05444	34.9288
			2.05556	34.5826					2.05556	34.6842					2.05556	37.3182					2.05556	34.9447
			2.05667	34.5937					2.05667	34.6782					2.05667	37.3028					2.05667	34.9568
			2.05778	34.5994					2.05778	34.6788					2.05778	37.2986					2.05778	34.9629
			2.05889	34.5845					2.05889	34.6801					2.05889	37.3016					2.05889	34.9666
			2.06	34.5662					2.06	34.6789					2.06	37.3237					2.06	34.973
			2.06111	34.5603					2.06111	34.6838					2.06111	37.3209					2.06111	34.9815
			2.06222	34.5623					2.06222	34.6916					2.06222	37.3207					2.06222	34.9886
			2.06333	34.5659					2.06333	34.6957					2.06333	37.3338					2.06333	34.9976
			2.06444	34.5732					2.06444	34.6999					2.06444	37.3245					2.06444	35.0027
			2.06556	34.5824					2.06556	34.6968					2.06556	37.319					2.06556	35.004
			2.06667	34.5869					2.06667	34.6902					2.06667	37.3123					2.06667	35.0053
			2.06778	34.5904					2.06778	34.6863					2.06778	37.3036					2.06778	35.0091
			2.06889	34.5864					2.06889	34.685					2.06889	37.2818					2.06889	35.011
			2.07	34.5766					2.07	34.69					2.07	37.2768					2.07	35.0066
			2.07111	34.5687					2.07111	34.6994					2.07111	37.2652					2.07111	35.0022
			2.07222	34.5713					2.07222	34.7088					2.07222	37.2426					2.07222	35.0016
			2.07333	34.572					2.07333	34.7136					2.07333	37.2351					2.07333	35.005
			2.07444	34.5637					2.07444	34.7174					2.07444	37.253					2.07444	35.0109
			2.07556	34.5627					2.07556	34.7198					2.07556	37.2789					2.07556	35.0174
			2.07667	34.5641					2.07667	34.7201					2.07667	37.3066					2.07667	35.0259
			2.07778	34.5668					2.07778	34.7171					2.07778	37.3126					2.07778	35.0324
			2.07889	34.5641					2.07889	34.7151					2.07889	37.3156					2.07889	35.0432
			2.08	34.5494					2.08	34.7069					2.08	37.3082					2.08	35.0643
			2.08111	34.5316					2.08111	34.7039					2.08111	37.2884					2.08111	35.0759
			2.08222	34.523					2.08222	34.6885					2.08222	37.2874					2.08222	35.0808
			2.08333	34.524					2.08333	34.6718					2.08333	37.2727					2.08333	35.0924
			2.08444	34.5243					2.08444	34.6601					2.08444	37.263					2.08444	35.1093
			2.08556	34.5287					2.08556	34.6557					2.08556	37.2663					2.08556	35.1191
			2.08667	34.5303					2.08667	34.657					2.08667	37.2693					2.08667	35.1211
			2.08778	34.5268					2.08778	34.655					2.08778	37.2706					2.08778	35.1244
			2.08889	34.5183					2.08889	34.6624					2.08889	37.2575					2.08889	35.1269
			2.09	34.5149					2.09	34.6708					2.09	37.2494					2.09	35.132
			2.09111	34.5137					2.09111	34.6808					2.09111	37.249					2.09111	35.144
			2.09222	34.5129					2.09222	34.6888					2.09222	37.2411					2.09222	35.1575
			2.09333	34.5114					2.09333	34.6965					2.09333	37.2225					2.09333	35.1692
			2.09444	34.5117					2.09444	34.7018					2.09444	37.2112					2.09444	35.1743
			2.09556	34.51					2.09556	34.707					2.09556	37.2208					2.09556	35.1786
			2.09667	34.5106					2.09667	34.7019					2.09667	37.2294					2.09667	35.1891
			2.09778	34.5128					2.09778	34.6977					2.09778	37.2311					2.09778	35.2018
			2.09889	34.5145					2.09889	34.6948					2.09889	37.2302					2.09889	35.2109
			2.1	34.5107					2.1	34.6919					2.1	37.2274					2.1	35.2157
			2.10111	34.5051					2.10111	34.6867					2.10111	37.234					2.10111	35.2235
			2.10222	34.5045					2.10222	34.6826					2.10222	37.2403					2.10222	35.2375
			2.10333	34.5086					2.10333	34.6821					2.10333	37.2467					2.10333	35.2615
			2.10444	34.5218					2.10444	34.6788					2.10444	37.2523					2.10444	35.2771
			2.10556	34.5585					2.10556	34.6812					2.10556	37.2558					2.10556	35.2808
			2.10667	34.6137					2.10667	34.6836					2.10667	37.2671					2.10667	35.2859
			2.10778	34.6484					2.10778	34.6897					2.10778	37.2716					2.10778	35.2882
			2.10889	34.6268					2.10889	34.6985					2.10889	37.2829					2.10889	35.2912
			2.11	34.598					2.11	34.7043					2.11	37.286					2.11	35.2942
			2.11111	34.5757					2.11111	34.7018					2.11111	37.2872					2.11111	35.2905
			2.11222	34.5621					2.11222	34.6898					2.11222	37.2985					2.11222	35.2921
			2.11333	34.5528					2.11333	34.6764					2.11333	37.3029					2.11333	35.2946
			2.11444	34.5485					2.11444	34.6701					2.11444	37.3062					2.11444	35.3024
			2.11556	34.5435					2.11556	34.6645					2.11556	37.3064					2.11556	35.3055
			2.11667	34.5297					2.11667	34.6645					2.11667	37.3192					2.11667	35.3005
			2.11778	34.5202					2.11778	34.6706					2.11778	37.3321					2.11778	35.2961
			2.11889	34.5212					2.11889	34.678					2.11889	37.3499					2.11889	35.2966
			2.12	34.5238					2.12	34.6811					2.12	37.3744					2.12	35.2875
			2.12111	34.534					2.12111	34.6642					2.12111	37.3847					2.12111	35.2721
			2.12222	34.5591					2.12222	34.643					2.12222	37.3899					2.12222	35.2524
			2.12333	34.6025					2.12333	34.6312					2.12333	37.3783					2.12333	35.2366
			2.12444	34.6457					2.12444	34.6354					2.12444	37.3762					2.12444	35.2204
			2.12556	34.6821					2.12556	34.64					2.12556	37.3763					2.12556	35.2041
			2.12667	34.7129					2.12667	34.6411					2.12667	37.3737					2.12667	35.1889
			2.12778	34.7493					2.12778	34.6351					2.12778	37.3701					2.12778	35.1786
			2.12889	34.7922					2.12889	34.6312					2.12889	37.3705					2.12889	35.1695
			2.13	34.8359					2.13	34.6309					2.13	37.38					2.13	35.1652
			2.13111	34.8825					2.13111	34.6307					2.13111	37.3965					2.13111	35.1673
			2.13222	34.9151					2.13222	34.6342					2.13222	37.4024					2.13222	35.1732
			2.13333	34.947					2.13333	34.641					2.13333	37.4082					2.13333	35.1792
			2.13444	34.9755					2.13444	34.6483					2.13444	37.417					2.13444	35.1838
			2.13556	35.0003					2.13556	34.6553					2.13556	37.4175					2.13556	35.1929
			2.13667	35.0249					2.13667	34.6561					2.13667	37.4162					2.13667	35.1962
			2.13778	35.0373					2.13778	34.6557					2.13778	37.4223					2.13778	35.1952
			2.13889	35.0432					2.13889	34.6552					2.13889	37.4282					2.13889	35.2025
			2.14	35.0422					2.14	34.6403					2.14	37.4401					2.14	35.208
			2.14111	35.0349					2.14111	34.6274					2.14111	37.4576					2.14111	35.214
			2.14222	35.025					2.14222	34.6174					2.14222	37.4635					2.14222	35.2192
			2.14333	35.0072					2.14333	34.615					2.14333	37.4603					2.14333	35.2098
			2.14444	35.0021					2.14444	34.6239					2.14444	37.4726					2.14444	35.1987
			2.14556	35.0007					2.14556	34.6267					2.14556	37.4748					2.14556	35.1904
			2.14667	35.0038					2.14667	34.615					2.14667	37.4734					2.14667	35.1824
			2.14778	35.0043					2.14778	34.5991					2.14778	37.4674					2.14778	35.1768
			2.14889	35.0057					2.14889	34.5964					2.14889	37.4552					2.14889	35.1722
			2.15	35.0048					2.15	34.592					2.15	37.4271					2.15	35.1746
			2.15111	35.0007					2.15111	34.5904					2.15111	37.4021					2.15111	35.1855
			2.15222	34.9965					2.15222	34.5934					2.15222	37.383					2.15222	35.1915
			2.15333	34.967					2.15333	34.6006					2.15333	37.3973					2.15333	35.1904
			2.15444	34.924					2.15444	34.6028					2.15444	37.4141					2.15444	35.1922
			2.15556	34.8794					2.15556	34.6054					2.15556	37.4303					2.15556	35.1883
			2.15667	34.8333					2.15667	34.6091					2.15667	37.4478					2.15667	35.1872
			2.15778	34.7911					2.15778	34.6202					2.15778	37.4618					2.15778	35.1816
			2.15889	34.7564					2.15889	34.6219					2.15889	37.4656					2.15889	35.1804
			2.16	34.7284					2.16	34.6022					2.16	37.4707					2.16	35.1802
			2.16111	34.7047					2.16111	34.5859					2.16111	37.4759					2.16111	35.1852
			2.16222	34.6922					2.16222	34.5734					2.16222	37.4866					2.16222	35.1873
			2.16333	34.6833					2.16333	34.5688					2.16333	37.5016					2.16333	35.1812
			2.16444	34.6745					2.16444	34.5622					2.16444	37.5043					2.16444	35.1834
			2.16556	34.6647					2.16556	34.558					2.16556	37.5103					2.16556	35.1793
			2.16667	34.6576					2.16667	34.5561					2.16667	37.502					2.16667	35.1762
			2.16778	34.658					2.16778	34.5599					2.16778	37.4842					2.16778	35.1827
			2.16889	34.6683					2.16889	34.5665					2.16889	37.483					2.16889	35.1901
			2.17	34.6834					2.17	34.5717					2.17	37.4897					2.17	35.1902
			2.17111	34.6972					2.17111	34.5802					2.17111	37.509					2.17111	35.1882
			2.17222	34.6999					2.17222	34.5961					2.17222	37.5293					2.17222	35.1947
			2.17333	34.699					2.17333	34.614					2.17333	37.5505					2.17333	35.1961
			2.17444	34.6835					2.17444	34.6428					2.17444	37.5723					2.17444	35.1932
			2.17556	34.6771					2.17556	34.6808					2.17556	37.5825					2.17556	35.191
			2.17667	34.6827					2.17667	34.7128					2.17667	37.5797					2.17667	35.2025
			2.17778	34.684					2.17778	34.7401					2.17778	37.5789					2.17778	35.2183
			2.17889	34.6815					2.17889	34.7719					2.17889	37.5855					2.17889	35.2303
			2.18	34.6758					2.18	34.8022					2.18	37.583					2.18	35.2347
			2.18111	34.67					2.18111	34.831					2.18111	37.5693					2.18111	35.2309
			2.18222	34.6621					2.18222	34.8613					2.18222	37.561					2.18222	35.2386
			2.18333	34.6576					2.18333	34.8926					2.18333	37.5509					2.18333	35.2609
			2.18444	34.6654					2.18444	34.923					2.18444	37.5485					2.18444	35.2701
			2.18556	34.6707					2.18556	34.9436					2.18556	37.5543					2.18556	35.2666
			2.18667	34.6655					2.18667	34.9609					2.18667	37.5547					2.18667	35.2721
			2.18778	34.6585					2.18778	34.9713					2.18778	37.5686					2.18778	35.2815
			2.18889	34.6533					2.18889	34.98					2.18889	37.5735					2.18889	35.2966
			2.19	34.6559					2.19	34.987					2.19	37.5714					2.19	35.3115
			2.19111	34.6596					2.19111	34.9979					2.19111	37.568					2.19111	35.3234
			2.19222	34.659					2.19222	35.0107					2.19222	37.575					2.19222	35.3433
			2.19333	34.6541					2.19333	35.0224					2.19333	37.5797					2.19333	35.3617
			2.19444	34.6452					2.19444	35.0285					2.19444	37.5832					2.19444	35.3735
			2.19556	34.6421					2.19556	35.0331					2.19556	37.5893					2.19556	35.3841
			2.19667	34.6363					2.19667	35.0406					2.19667	37.5952					2.19667	35.4026
			2.19778	34.6353					2.19778	35.0324					2.19778	37.6007					2.19778	35.4244
			2.19889	34.6281					2.19889	35.0022					2.19889	37.5931					2.19889	35.443
			2.2	34.6208					2.2	34.967					2.2	37.5695					2.2	35.4645
			2.20111	34.6312					2.20111	34.9277					2.20111	37.5565					2.20111	35.4837
			2.20222	34.6457					2.20222	34.8952					2.20222	37.5504					2.20222	35.504
			2.20333	34.6558					2.20333	34.8623					2.20333	37.5577					2.20333	35.5254
			2.20444	34.6593					2.20444	34.841					2.20444	37.5798					2.20444	35.5412
			2.20556	34.6596					2.20556	34.8312					2.20556	37.5927					2.20556	35.5609
			2.20667	34.657					2.20667	34.8282					2.20667	37.6069					2.20667	35.5757
			2.20778	34.6549					2.20778	34.8248					2.20778	37.6175					2.20778	35.5831
			2.20889	34.6499					2.20889	34.8307					2.20889	37.6227					2.20889	35.5848
			2.21	34.6329					2.21	34.8342					2.21	37.623					2.21	35.5904
			2.21111	34.6179					2.21111	34.8386					2.21111	37.6344					2.21111	35.6004
			2.21222	34.6121					2.21222	34.8494					2.21222	37.6484					2.21222	35.6118
			2.21333	34.6018					2.21333	34.8637					2.21333	37.6484					2.21333	35.6204
			2.21444	34.5898					2.21444	34.8729					2.21444	37.64					2.21444	35.6261
			2.21556	34.5873					2.21556	34.8819					2.21556	37.6331					2.21556	35.6119
			2.21667	34.5801					2.21667	34.893					2.21667	37.6262					2.21667	35.6028
			2.21778	34.577					2.21778	34.9034					2.21778	37.6237					2.21778	35.5932
[truncated: 19,604 more rows]

## Sheet: Fig2-B WaketoNREM
time from transition	_1WT_TC03	_1WT_TC06	_1WT_TC08	_1WT_TC09	_1WT_TC12	_1WT_TC13	_1WT_TC18	_2KO_TC01	_2KO_TC07	_2KO_TC10	_2KO_TC15	_2KO_TC16	_2KO_TC17	_2KO_TC19
-0.933333	-0.0118	-0.0178	-0.048	-0.0247	-0.006	0.0072		0.0135	-0.0019	-0.0015	0.0182	-0.0115	0.0454	0.0058
-0.866667	-0.0095	-0.0207	-0.0435	-0.0212	-0.006	0.0083		0.0102	0.0011	0	0.0287	-0.0117	0.0451	0.0043
-0.8	-0.0046	-0.0127	-0.0303	-0.0181	-0.0123	0.009		0.0165	0.0016	-0.0028	0.0372	-0.0127	0.0463	-0.0094
-0.733333	-0.0062	-0.0119	-0.027	-0.0131	-0.0055	0.0068		0.0302	0.0022	0.021	0.0433	-0.0104	0.0576	-0.0163
-0.666667	-0.0086	0.0066	-0.0316	0.0087	0.004	0.0157		0.0465	0.007	0.0289	0.0458	-0.0027	0.0677	-0.0193
-0.6	-0.0063	0.0059	-0.0296	0.0126	0.0049	0.0155		0.0458	0.0082	0.0279	0.0409	-0.0004	0.0633	-0.0155
-0.533333	-0.0067	0.0054	-0.0272	0.0126	0.0034	0.013		0.042	0.0087	0.0217	0.0365	-0.0002	0.0532	-0.0126
-0.466667	-0.008	0.0036	-0.0217	0.009	0.0016	0.009		0.0346	0.0077	0.0181	0.031	0.0003	0.0439	-0.0109
-0.4	-0.0102	0.0033	-0.018	0.0032	0.0019	0.0073		0.0269	0.0066	0.0117	0.0263	0.001	0.0332	-0.0095
-0.333333	-0.0121	0.003	-0.0143	-0.0019	0.0014	0.0062		0.0191	0.0039	0.0074	0.0215	0.0008	0.0232	-0.0081
-0.266667	-0.0099	0.0002	-0.0073	0.0024	0.0018	0.0045		0.0133	0.0021	0.0045	0.0179	0.0021	0.0167	-0.0065
-0.2	-0.0042	-0.0005	-0.0031	0.0053	0.0031	0.0027		0.0087	0.0012	0.0065	0.012	0.0028	0.0095	-0.0036
-0.133333	-0.0019	0.0003	0.0006	0.0017	0.0027	0.0014		0.0031	0.001	0.0024	0.0029	0.0017	0.0042	-0.001
-0.0666666	0.0019	-0.0003	-0.0006	-0.0017	-0.0027	-0.0014		-0.0031	-0.001	-0.0024	-0.0029	-0.0017	-0.0042	0.001
1e-07	-0.0084	-0.0094	-0.0159	-0.0059	-0.014	-0.0139		-0.0127	-0.0072	-0.014	-0.0171	-0.0112	-0.0183	-0.0074
0.0666668	-0.0383	-0.0313	-0.0446	-0.0165	-0.0301	-0.0326		-0.0262	-0.0272	-0.0322	-0.0386	-0.0293	-0.0359	-0.028
0.133333	-0.0673	-0.0534	-0.0697	-0.0208	-0.0463	-0.0491		-0.0407	-0.0539	-0.05	-0.0559	-0.0472	-0.0506	-0.0474
0.2	-0.0986	-0.0725	-0.0935	-0.0379	-0.0618	-0.0644		-0.0557	-0.0799	-0.0705	-0.0731	-0.0654	-0.0648	-0.0648
0.266667	-0.1244	-0.0896	-0.114	-0.056	-0.077	-0.0778		-0.0692	-0.1054	-0.0873	-0.0905	-0.0831	-0.0803	-0.0829
0.333333	-0.1448	-0.1037	-0.1328	-0.0647	-0.0907	-0.0897		-0.0817	-0.1298	-0.1044	-0.1043	-0.098	-0.0941	-0.1014
0.4	-0.1648	-0.1122	-0.1517	-0.0733	-0.1115	-0.0998		-0.0944	-0.1636	-0.1177	-0.1136	-0.1128	-0.1068	-0.1164
0.466667	-0.1799	-0.1236	-0.1561	-0.0744	-0.1267	-0.1075		-0.1088	-0.1854	-0.1292	-0.1052	-0.126	-0.1166	-0.1314
0.533333	-0.1916	-0.1314	-0.1907	-0.0862	-0.1469	-0.1111		-0.1198	-0.209	-0.1402	-0.1056	-0.1391	-0.118	-0.1366

## Sheet: Fig2-B NREMtoREM
time from transition	_1WT_TC03	_1WT_TC06	_1WT_TC08	_1WT_TC09	_1WT_TC12	_1WT_TC13	_1WT_TC18	_2KO_TC01	_2KO_TC07	_2KO_TC10	_2KO_TC15	_2KO_TC16	_2KO_TC17	_2KO_TC19
-1.46667	0.0206	-0.0071	0.0042	0.0064	0.0128	0.0086	0.0118	-0.0131	0.0047	0.0042	-0.0017	0.0178	-0.0107	-0.0072
-1.4	0.0193	-0.0074	-0.0008	0.0126	0.0109	0.0087	0.0146	-0.0042	0.0026	0.002	0.0027	0.015	-0.0039	-0.011
-1.33333	0.0198	-0.0013	-0.0049	0.0054	0.0062	0.0082	0.0105	-0.0074	-0.0007	0.0018	0.0003	0.0103	-0.008	-0.0124
-1.26667	0.0164	-0.0035	-0.0068	0.0068	0.0033	0.0079	0.005	-0.0105	-0.0046	-0.0004	-0.0023	0.0068	-0.0074	-0.0109
-1.2	0.011	-0.0045	-0.0078	0.0078	0.0021	0.0136	0.0011	-0.0074	-0.0065	-0.0013	-0.0028	0.0035	-0.01	-0.0115
-1.13333	0.0046	-0.0038	-0.0064	0.0062	0.0018	0.0165	0.0001	-0.0078	-0.0089	-0.0041	-0.0055	0.0033	-0.0087	-0.0115
-1.06667	0.0038	-0.0062	-0.0064	0.0015	0.0009	0.0147	-0.003	-0.0052	-0.0029	-0.0044	-0.0076	0.0037	-0.0036	-0.0111
-1	-0.0002	-0.0062	-0.0076	0.0027	-0.0037	0.0079	-0.0058	-0.0039	-0.0062	-0.0077	-0.0068	0.0067	-0.004	-0.0143
-0.933333	-0.0034	-0.0095	-0.0089	-0.0021	-0.0071	0.0075	-0.0076	-0.0068	-0.0083	-0.0101	-0.0086	0.0042	-0.008	-0.0179
-0.866667	-0.0037	-0.0127	-0.0133	-0.0015	-0.0074	0.0068	-0.0078	-0.0073	-0.0069	-0.0115	-0.0119	0.001	-0.0041	-0.0198
-0.8	-0.0066	-0.0158	-0.0172	-0.004	-0.0097	0.0026	-0.0069	-0.0077	-0.0085	-0.0143	-0.014	0.002	-0.0067	-0.0191
-0.733333	-0.0069	-0.0177	-0.0176	-0.0045	-0.0079	0.0014	-0.0095	-0.0096	-0.008	-0.0161	-0.0155	-0.0013	-0.0085	-0.0215
-0.666667	-0.0073	-0.0196	-0.0152	-0.0061	-0.0067	-0.0008	-0.0097	-0.012	-0.0111	-0.0165	-0.0184	-0.0007	-0.0094	-0.0229
-0.6	-0.0097	-0.0225	-0.0174	-0.0058	-0.0083	-0.0029	-0.0126	-0.0119	-0.0128	-0.0176	-0.0158	-0.0039	-0.0109	-0.0232
-0.533333	-0.0108	-0.0245	-0.0184	-0.0083	-0.0103	-0.0038	-0.0145	-0.0145	-0.0134	-0.0195	-0.0169	-0.0063	-0.0114	-0.0245
-0.466667	-0.0128	-0.025	-0.0181	-0.0084	-0.0121	-0.0038	-0.0158	-0.016	-0.0136	-0.0195	-0.018	-0.008	-0.0113	-0.0244
-0.4	-0.0135	-0.0243	-0.0184	-0.0092	-0.012	-0.0034	-0.0167	-0.0162	-0.0129	-0.0179	-0.0161	-0.0086	-0.0118	-0.0233
-0.333333	-0.0127	-0.0219	-0.0161	-0.006	-0.0106	-0.0036	-0.0166	-0.0161	-0.0112	-0.0158	-0.0133	-0.0084	-0.0111	-0.0215
-0.266667	-0.011	-0.0177	-0.0131	-0.0062	-0.0079	-0.0035	-0.0146	-0.0145	-0.0095	-0.0133	-0.0117	-0.0079	-0.0099	-0.0184
-0.2	-0.009	-0.0121	-0.0087	-0.005	-0.0055	-0.0027	-0.0104	-0.0121	-0.0082	-0.0103	-0.008	-0.0068	-0.0076	-0.0147
-0.133333	-0.0038	-0.0046	-0.0035	-0.0007	-0.002	-0.0013	-0.0046	-0.008	-0.0062	-0.0075	-0.0049	-0.0051	-0.0045	-0.0106
-0.0666666	0.0038	0.0046	0.0035	0.0007	0.002	0.0013	0.0046	-0.0032	-0.0029	-0.0035	-0.0015	-0.0022	-0.0013	-0.0043
1e-07	0.0133	0.0162	0.0089	0.0057	0.0071	0.0052	0.0191	0.0032	0.0029	0.0035	0.0015	0.0022	0.0013	0.0043
0.0666668	0.029	0.0354	0.0187	0.0114	0.0134	0.0128	0.0428	0.0128	0.0116	0.0127	0.0057	0.0094	0.0038	0.0168
0.133333	0.0539	0.0621	0.0355	0.0211	0.0253	0.0269	0.0761	0.0292	0.0262	0.03	0.0162	0.0229	0.0084	0.0368
0.2	0.0865	0.0947	0.057	0.0357	0.0438	0.0486	0.1156	0.0537	0.048	0.0556	0.0358	0.043	0.0172	0.0662
0.266667	0.1247	0.13	0.0847	0.0548	0.0661	0.0746	0.1571	0.0837	0.0757	0.0855	0.0631	0.067	0.0316	0.102
0.333333	0.1663	0.1657	0.1142	0.0772	0.0921	0.1032	0.2003	0.1169	0.1074	0.1167	0.0982	0.0939	0.0503	0.1427
0.4	0.2066	0.2005	0.1522	0.1023	0.1224	0.1406	0.2433	0.1519	0.1408	0.1466	0.1352	0.1241	0.0733	0.1857
0.466667	0.251	0.2358	0.1873	0.1309	0.1497	0.1711	0.2836	0.1876	0.1744	0.1742	0.1749	0.1541	0.0989	0.2257
0.533333	0.2819	0.2652	0.2264	0.1566	0.1794	0.2025	0.3167	0.2187	0.2063	0.2024	0.216	0.1859	0.1272	0.2586
0.6	0.31	0.2954	0.2613	0.1829	0.2088	0.234	0.3467	0.2457	0.2353	0.2256	0.2522	0.2175	0.1578	0.2939
0.666667	0.3429	0.3203	0.2942	0.2075	0.2343	0.263	0.3718	0.2702	0.2599	0.2425	0.2856	0.2416	0.1876	0.323
0.733333	0.3629	0.3445	0.3221	0.2294	0.2625	0.2893	0.3937	0.2861	0.2837	0.2586	0.3147	0.2637	0.2174	0.349
0.8	0.3724	0.3564	0.3468	0.2444	0.2822	0.314	0.417	0.3001	0.3042	0.2762	0.3399	0.2783	0.2451	0.3654
0.866667	0.3857	0.3775	0.3665	0.2615	0.3059	0.3358	0.4325	0.3118	0.3238	0.2925	0.3537	0.2948	0.2648	0.3818
0.933333	0.3969	0.389	0.3788	0.2726	0.3196	0.3551	0.4553	0.3253	0.3335	0.302	0.3698	0.3066	0.2821	0.3937
1	0.41	0.4041	0.3909	0.2779	0.335	0.3661	0.4682	0.3372	0.3431	0.3124	0.3794	0.3158	0.2973	0.4034
1.06667	0.4269	0.4095	0.3998	0.2818	0.3447	0.3748	0.4794	0.3467	0.3543	0.3182	0.3956	0.3181	0.3071	0.412
1.13333	0.4348	0.4101	0.4062	0.2956	0.3449	0.3856	0.486	0.3546	0.3625	0.3231	0.3978	0.3152	0.3159	0.4152
1.2	0.445	0.4109	0.4081	0.298	0.3542	0.3811	0.4981	0.3542	0.3668	0.3247	0.4019	0.3216	0.3239	0.4278
1.26667	0.4455	0.4257	0.4132	0.3036	0.3587	0.3776	0.4926	0.3527	0.3731	0.3292	0.4006	0.3264	0.3288	0.434
1.33333	0.4499	0.4211	0.423	0.3029	0.3633	0.378	0.5	0.3524	0.3654	0.3354	0.4057	0.3274	0.3324	0.4436
1.4	0.4571	0.4207	0.429	0.3056	0.376	0.3795	0.503	0.3537	0.3737	0.3465	0.4036	0.3283	0.3309	0.4437
1.46667	0.4598	0.419	0.435	0.3023	0.3798	0.3783	0.4999	0.3429	0.3777	0.3485	0.4008	0.3325	0.3335	0.449

## Sheet: Fig2-B NREMtoWake
time from transition	_1WT_TC03	_1WT_TC06	_1WT_TC08	_1WT_TC09	_1WT_TC12	_1WT_TC13	_1WT_TC18	_2KO_TC01	_2KO_TC07	_2KO_TC10	_2KO_TC15	_2KO_TC16	_2KO_TC17	_2KO_TC19
-0.933333	0.0463	0.0349	0.0496	0.0287	0.0244	0.0558		0.0232	0.0183	0.0349	0.0218	0.0597	0.0263	0.0308
-0.866667	0.0476	0.027	0.0491	0.0477	0.02	0.044		0.0191	0.0137	0.0298	0.02	0.0529	0.029	0.0216
-0.8	0.0324	0.031	0.049	0.0427	0.0146	0.0415		0.0156	0.0293	0.0381	0.0144	0.0463	0.0417	0.0148
-0.733333	0.0216	0.0318	0.0361	0.0292	0.0148	0.0409		0.0135	0.0603	0.0343	0.0114	0.0396	0.0387	0.0175
-0.666667	0.0244	0.0262	0.0279	0.036	0.0173	0.0418		0.0162	0.0544	0.0307	0.0117	0.0375	0.0312	0.0174
-0.6	0.0185	0.0206	0.0206	0.0286	0.014	0.0355		0.0139	0.046	0.0245	0.0072	0.0342	0.0254	0.0136
-0.533333	0.0135	0.016	0.014	0.0236	0.0103	0.0294		0.0118	0.0379	0.0209	0.0059	0.0306	0.0199	0.0116
-0.466667	0.0112	0.0124	0.0098	0.0237	0.007	0.0234		0.0095	0.0311	0.0193	0.0046	0.0251	0.015	0.0105
-0.4	0.0097	0.0095	0.0083	0.0202	0.0053	0.0179		0.0068	0.0241	0.0159	0.0019	0.0183	0.0115	0.0075
-0.333333	0.0086	0.007	0.0066	0.0197	0.0031	0.013		0.0046	0.0176	0.0114	0.0013	0.0124	0.0093	0.0054
-0.266667	0.0036	0.0039	0.0043	0.0129	0.0013	0.0087		0.0023	0.0113	0.0081	0.0021	0.0078	0.0049	0.0037
-0.2	0.002	0.0022	0.002	0.0079	0.0002	0.0047		0.0002	0.0064	0.0061	0.0025	0.0044	0.0028	0.002
-0.133333	0	0.0004	0.0006	0.0022	-0.0002	0.0014		0.0002	0.0014	0.0022	0.0013	0.0013	0.0007	0.0013
-0.0666666	0	-0.0004	-0.0006	-0.0022	0.0002	-0.0014		-0.0002	-0.0014	-0.0022	-0.0013	-0.0013	-0.0007	-0.0013
1e-07	-0.0042	-0.0027	-0.004	-0.0152	-0.0014	-0.0065		-0.0046	-0.0046	-0.0074	-0.0075	-0.0044	-0.0044	-0.0102
0.0666668	-0.0037	-0.0093	-0.0096	-0.0231	-0.005	-0.0085		-0.0102	-0.0109	-0.016	-0.021	-0.0082	-0.014	-0.0191
0.133333	0.0037	-0.0139	-0.0107	-0.0215	-0.0049	-0.0012		-0.0096	-0.0088	-0.0142	-0.0225	-0.0034	-0.0169	-0.0228
0.2	0.0167	-0.0138	-0.0061	-0.0248	0.0031	0.0071		-0.0023	-0.0011	-0.0063	-0.0132	0.0054	-0.0127	-0.0201
0.266667	0.0326	-0.008	0.0026	-0.0215	0.0158	0.0173		0.0072	0.0112	0.0082	-0.0016	0.0156	-0.0065	-0.0118
0.333333	0.0462	0.0002	0.0159	-0.0102	0.0296	0.0293		0.0197	0.0246	0.0224	0.0136	0.0269	0.001	0.0016
0.4	0.0603	0.0117	0.0332	-0.0037	0.0439	0.0429		0.0333	0.0447	0.0297	0.0342	0.0383	0.0084	0.0178
0.466667	0.0787	0.0207	0.0477	0.0054	0.0604	0.0596		0.0432	0.0615	0.0453	0.0523	0.0489	0.0124	0.029
0.533333	0.0896	0.033	0.0589	0.0095	0.0725	0.0725		0.0502	0.0766	0.0608	0.0687	0.0564	0.0173	0.0432
0.6	0.1063	0.0406	0.0683	0.0185	0.0746	0.0829		0.0609	0.0903	0.0615	0.0788	0.0638	0.0255	0.0579
0.666667	0.1183	0.0493	0.0763	0.0231	0.0857	0.0973		0.0668	0.1056	0.0701	0.0895	0.0711	0.0379	0.0684
0.733333	0.1279	0.0686	0.0896	0.031	0.0952	0.1101		0.0715	0.1206	0.0811	0.0925	0.0781	0.051	0.0808
0.8	0.1404	0.0769	0.0957	0.0323	0.1092	0.1189		0.0898	0.1315	0.0837	0.1032	0.0894	0.064	0.0889
0.866667	0.1612	0.0925	0.1034	0.0383	0.1196	0.1285		0.0966	0.1444	0.0953	0.1204	0.1022	0.0758	0.0897
0.933333	0.1726	0.1041	0.117	0.0427	0.1294	0.1451		0.1014	0.1557	0.1083	0.1262	0.113	0.0812	0.0973
1	0.1825	0.1153	0.1253	0.0382	0.1396	0.157		0.1065	0.1665	0.1158	0.1361	0.122	0.0867	0.1035
1.06667	0.1963	0.1256	0.1327	0.0508	0.1491	0.1822		0.1105	0.1754	0.1271	0.1476	0.13	0.0873	0.1072
1.13333	0.2118	0.1358	0.1422	0.0691	0.1639	0.1944		0.1136	0.1835	0.1273	0.1622	0.1439	0.0893	0.1108
1.2	0.2234	0.1441	0.1488	0.0742	0.1665	0.2064		0.1261	0.192	0.1355	0.1728	0.1521	0.0947	0.1147
1.26667	0.2331	0.1534	0.1554	0.0696	0.1741	0.2225		0.1308	0.1976	0.1607	0.1843	0.1586	0.1057	0.1179
1.33333	0.244	0.1602	0.1634	0.0675	0.1816	0.2334		0.1367	0.2024	0.1668	0.1959	0.1652	0.1207	0.1244
1.4	0.2512	0.1666	0.1722	0.0703	0.1904	0.2433		0.1398	0.2073	0.1816	0.2024	0.1724	0.1263	0.1279
1.46667	0.2573	0.1739	0.1797	0.0803	0.1982	0.2557		0.1427	0.2124	0.1931	0.2076	0.1807	0.1319	0.1334

## Sheet: Fig2-B REMtoWake
time from transition	_1WT_TC03	_1WT_TC06	_1WT_TC08	_1WT_TC09	_1WT_TC12	_1WT_TC13	_1WT_TC18	_2KO_TC01	_2KO_TC07	_2KO_TC10	_2KO_TC15	_2KO_TC16	_2KO_TC17	_2KO_TC19
-0.933333	-0.1386	-0.0844	-0.1853	-0.1404	-0.1442	-0.1465	-0.1519	-0.1305	-0.1709	-0.1651	-0.2294	-0.148	-0.1733	-0.1248
-0.866667	-0.1485	-0.0677	-0.1846	-0.1343	-0.1375	-0.1455	-0.154	-0.1327	-0.1618	-0.1491	-0.2202	-0.1356	-0.1597	-0.1438
-0.8	-0.1605	-0.0573	-0.1827	-0.1256	-0.1275	-0.1309	-0.1472	-0.1235	-0.1579	-0.1339	-0.1987	-0.1277	-0.1449	-0.1318
-0.733333	-0.1571	-0.0869	-0.1691	-0.1109	-0.1196	-0.115	-0.1355	-0.1083	-0.1371	-0.1244	-0.1781	-0.1298	-0.1285	-0.131
-0.666667	-0.1383	-0.0797	-0.1601	-0.0987	-0.1127	-0.1118	-0.1117	-0.1044	-0.1172	-0.107	-0.1555	-0.1165	-0.1116	-0.1394
-0.6	-0.1229	-0.0711	-0.1415	-0.0893	-0.1008	-0.0958	-0.0879	-0.0909	-0.1011	-0.0856	-0.1324	-0.1017	-0.0925	-0.1226
-0.533333	-0.1037	-0.0605	-0.1202	-0.0694	-0.0865	-0.0797	-0.0677	-0.0774	-0.0846	-0.0662	-0.1104	-0.0875	-0.0748	-0.1059
-0.466667	-0.086	-0.0511	-0.1012	-0.0572	-0.0724	-0.0631	-0.0487	-0.0631	-0.0683	-0.0506	-0.0852	-0.074	-0.0592	-0.0884
-0.4	-0.07	-0.0407	-0.08	-0.0496	-0.0588	-0.0473	-0.031	-0.0483	-0.0532	-0.0369	-0.0642	-0.0604	-0.0449	-0.0699
-0.333333	-0.0538	-0.0303	-0.0607	-0.0339	-0.046	-0.0344	-0.0177	-0.0356	-0.0366	-0.0248	-0.0466	-0.0486	-0.0338	-0.0532
-0.266667	-0.0404	-0.0205	-0.0415	-0.0225	-0.0319	-0.024	-0.0092	-0.0239	-0.0245	-0.0174	-0.0289	-0.0361	-0.023	-0.0365
-0.2	-0.0241	-0.0123	-0.0243	-0.0125	-0.0184	-0.0147	-0.0044	-0.0135	-0.015	-0.0098	-0.0141	-0.0219	-0.0126	-0.0197
-0.133333	-0.0067	-0.0035	-0.0068	-0.0033	-0.0061	-0.0051	-0.0011	-0.0047	-0.0041	-0.0022	-0.0041	-0.007	-0.0035	-0.0052
-0.0666666	0.0067	0.0035	0.0068	0.0033	0.0061	0.0051	0.0011	0.0047	0.0041	0.0022	0.0041	0.007	0.0035	0.0052
1e-07	0.0164	0.0035	0.0127	0.0071	0.0131	0.0093	-0.0038	0.0092	0.006	0.0057	0.0086	0.0147	0.0053	0.0088
0.0666668	0.0021	-0.0205	-0.0053	0.0034	0.0034	-0.0098	-0.0224	-0.0051	-0.0178	-0.0196	-0.0302	-0.0007	-0.0204	-0.018
0.133333	-0.0212	-0.0503	-0.0356	-0.0255	-0.0156	-0.0423	-0.0614	-0.0361	-0.0481	-0.0522	-0.0741	-0.0281	-0.0552	-0.0622
0.2	-0.0435	-0.0825	-0.0647	-0.0551	-0.037	-0.0772	-0.1041	-0.0692	-0.0788	-0.0783	-0.1086	-0.0552	-0.0907	-0.1073
0.266667	-0.0685	-0.114	-0.0949	-0.0856	-0.0606	-0.1109	-0.1616	-0.1002	-0.1069	-0.1038	-0.1401	-0.0827	-0.1235	-0.151
0.333333	-0.0907	-0.1411	-0.1209	-0.1074	-0.0835	-0.142	-0.179	-0.1285	-0.1324	-0.1305	-0.1704	-0.1071	-0.1512	-0.1891
0.4	-0.1102	-0.1639	-0.1473	-0.1424	-0.115	-0.1702	-0.2119	-0.1525	-0.1488	-0.1481	-0.2	-0.1251	-0.1729	-0.2367
0.466667	-0.1211	-0.1711	-0.1669	-0.161	-0.1333	-0.1938	-0.2335	-0.1709	-0.1674	-0.1741	-0.2203	-0.1414	-0.1821	-0.2571
0.533333	-0.1314	-0.181	-0.1782	-0.1747	-0.1393	-0.2047	-0.2458	-0.1774	-0.177	-0.1638	-0.2368	-0.1526	-0.1887	-0.285
0.6	-0.1423	-0.1876	-0.1824	-0.1764	-0.1545	-0.2268	-0.2506	-0.1824	-0.1832	-0.1583	-0.2412	-0.1659	-0.1912	-0.2915
