# Supplementary material for: Cold-inducible RNA-binding protein (CIRBP) adjusts clock-gene expression and REM-sleep recovery following sleep deprivation
Source: eLife. 2019 Feb 5;8:e43400. doi: 10.7554/eLife.43400 (PMC6379088; doi:10.7554/eLife.43400)
Supplement: Figure 3—figure supplement 1—source data 1. [file elife-43400-fig3-figsupp1-data1.xlsx]

## Sheet: Fig3-suppl1
			WT						KO
		Hour	TC03	TC06	TC08	TC09	TC12	TC13	TC01	TC07	TC15	TC16	TC17	TC19
		0.5	34.96	35.46	34.9611	34.43	35.6631	35.01	34.9051	35.24	35.34	34.15	35.3	35.59
		1.5	34.79	35.28	34.8911	34.64	34.8831	34.75	34.6151	34.9	33.96	34.39	34.57	34.69
		2.5	33.93	34.73	34.5511	34.69	34.7431	34.75	34.6651	35.19	34.75	34.76	35.01	35.15
		3.5	34.13	35.06	34.7411	35.26	34.3531	34.49	34.5151	34.71	33.93	34.26	34.61	34.73
		4.5	34.23	34.72	35.3411	34.48	35.1031	34.38	34.4451	34.65	34.28	34.67	35.56	34.69
		5.5	34.23	34.5	34.5711	34.17	34.6231	35.56	34.5251	35.37	34.05	34.12	34.82	35.25
		6.5	34.33	34.79	34.7311	34.02	34.4631	34.39	35.2351	34.92	34.22	34.4	35.12	34.81
		7.5	34.09	34.6	34.6111	34.16	35.0531	34.85	34.4951	35.02	34.31	34.17	34.52	34.76
		8.5	34.35	34.74	34.7511	34.01	34.3631	34.92	34.9451	34.77	34.17	34.81	34.31	34.85
		9.5	34.13	34.89	34.7311	34.58	34.4031	34.7	34.5651	34.95	34.26	35.16	35.72	35.24
		10.5	33.85	34.98	35.2011	34.43	34.8731	35.04	34.9751	35.46	34.13	35.06	34.75	35.5
		11.5	34.57	35.51	35.3911	34.82	35.2431	35.22	35.5051	35.97	34.61	35.45	35.47	35.97
		12.5	35.61	36.95	36.5011	36.45	36.3631	36.32	36.3051	37.01	36.05	36.47	36.58	36.54
		13.5	35.62	36.34	36.4011	36.74	36.7931	36.37	36.4851	36.88	36.38	36.5	36.97	36.72
		14.5	35.4	35.97	35.8211	36.76	36.7131	36.24	35.8051	36.96	36.32	36.52	36.27	36.35
		15.5	35.79	35.74	35.7311	36.55	36.5231	36.34	36.4651	37.16	36.41	36.49	36.71	35.39
		16.5	35.48	36.61	36.2411	36.66	36.7831	36.86	36.1451	37.11	36.36	36.51	36.24	36.38
		17.5	35.41	36.24	35.6411	35.46	35.3831	36.05	36.2151	36.21	36.27	36.41	36.61	36.53
		18.5	35.55	36.52	35.7411	35.47	36.3431	35.82	36.1951	35.68	34.38	36.2	35.67	35.28
		19.5	35.64	35.48	34.9711	36.08	35.8531	35.91	36.1151	36.2	35.74	35.01	36.07	35.75
		20.5	34.66	35.69	35.7611	34.43	34.4931	35.52	34.9851	35.33	34.64	36.09	35.8	35.09
		21.5	34.78	35.79	35.7111	35.03	35.0031	35.96	35.4051	35.71	36.15	35.1	36.08	35.22
		22.5	34.88	36.08	35.0611	36.29	35.5031	35.39	35.8251	36.41	34.42	35.54	35.81	35.98
		23.5	35.68	36.2	35.6711	35.67	36.3631	35.18	35.8151	37.01	35.19	35.83	36.01	36.34
		24.5	35.2	35.05	34.8811	34.99	35.1131	34.68	34.9651	35.85	34.79	34.14	35.24	35.05
		25.5	34.49	35	34.7211	34.19	34.7131	34.52	34.6351	35.09	34.14	35.26	35.18	34.56
		26.5	34.24	35.02	34.7811	34.56	35.6931	34.84	34.6351	35.57	34.5	34.35	35.48	34.41
		27.5	34.38	34.89	34.5711	34.38	34.3331	34.86	35.1351	35.06	34.36	34.3	35.22	35.64
		28.5	34.26	34.72	34.3511	34.15	35.1931	35.16	34.6151	34.78	33.93	34.3	34.63	34.9
		29.5	34.53	34.8	34.5311	34.5	34.6031	34.44	34.5551	34.85	34.65	34.56	34.75	34.73
		30.5	34.15	34.64	34.9411	33.96	34.3431	34.59	34.5551	35.38	34.18	34.2	34.86	34.57
		31.5	33.84	34.85	34.5111	34.24	34.4331	34.89	34.7951	34.8	34.24	34.47	34.39	34.69
		32.5	33.74	34.75	34.6411	34.07	34.6131	34.89	34.4951	35.07	34.35	34.4	34.96	34.45
		33.5	34.11	34.81	34.7311	34.55	34.6731	34.68	34.7451	34.81	34.12	34.65	34.87	35.1
		34.5	34.16	34.98	35.0611	34.69	34.7231	34.89	34.8551	35.26	34.39	35.37	35.37	34.9
		35.5	34.72	35.57	35.5111	34.65	35.0231	34.92	35.5251	35.52	34.15	35.55	35.57	35.79
		36.5	35.63	36.87	36.6511	36.51	36.3131	36.26	36.0251	36.96	35.67	36.58	36.63	36.59
		37.5	35.98	36.4	36.3511	36.74	36.6431	36.42	36.4351	37.19	36.32	36.64	36.86	36.63
		38.5	35	36.61	36.0211	36.57	36.0831	36.46	35.9651	37.16	36.2	36.62	36.44	36.63
		39.5	35.93	36.61	35.3611	36.5	36.6431	36.55	36.4251	36.4	36.41	36.58	36.83	36.66
		40.5	35.25	36.23	36.0111	35.81	36.1631	36.39	36.1051	37.2	35.29	36.47	36.4	35.12
		41.5	35.82	36.25	36.0911	36.01	35.8831	36.08	36.1951	36.98	36.47	36.41	36.68	35.88
		42.5	35.29	35.64	35.4711	35.73	36.6931	36.38	35.8951	35.13	35.61	36.07	35.84	36.68
		43.5	35.45	35.53	35.4211	34.52	35.3231	35.37	35.7851	35.7	34.83	35.48	35.81	35.53
		44.5	35.01	35.64	34.9911	34.94	34.9731	35.76	35.5651	36	35.26	34.99	36.35	34.74
		45.5	34.79	35.92	35.3711	36	35.3731	35.57	35.3951	34.81	35.33	35.82	35.2	35.66
		46.5	34.77	36.5	35.5811	34.82	35.8031	35.8	35.8651	36.4	35.6	34.45	35.76	35.5
		47.5	35.76	36.4	36.0711	35.69	35.6331	35.28	36.2151	36.93	35.58	35.62	36.21	36.45
