# Supplementary material for: Cold-inducible RNA-binding protein (CIRBP) adjusts clock-gene expression and REM-sleep recovery following sleep deprivation
Source: eLife. 2019 Feb 5;8:e43400. doi: 10.7554/eLife.43400 (PMC6379088; doi:10.7554/eLife.43400)
Supplement: Figure 3—figure supplement 2—source data 1. [file elife-43400-fig3-figsupp2-data1.xlsx]

## Sheet: Sheet1
These are the residuals of the full model that predicted best the variance in Tcx. Each column represents one individual mouse (WT only)
hour	TC03	TC06	TC08	TC09	TC12	TC13
0.5	0.041611	0.07389	0.026918	0.27321	0.27214	0.496403
1.5	-0.31055	-0.28037	0.170356	0.061892	-0.6548	-0.09377
2.5	0.409004	0.254462	0.097469	-0.00476	-0.18379	-0.27958
3.5	-0.67771	-0.53115	0.346856	-0.14536	0.136985	-0.08298
4.5	0.018918	-0.05494	-0.68091	0.169357	-0.34752	-0.17668
5.5	-0.01285	-0.26694	0.199627	-0.09572	0.070355	-0.73443
6.5	-0.1467	-0.47328	-0.42654	-0.02817	0.123134	-0.09467
7.5	0.267732	-0.22417	-0.40063	-0.57702	-0.80405	-0.11255
8.5	-0.62381	0.174304	-0.27744	-0.30895	0.146203	-0.25665
9.5	-0.83237	-0.24617	0.144173	-0.21894	-0.39057	0.069474
10.5	-0.53358	-0.35256	-0.33347	-0.2455	-0.06904	0.042381
11.5	-0.47323	0.132335	0.284555	-0.21695	0.064079	-0.06225
12.5	-0.01843	0.205701	0.016406	0.102914	0.017033	0.004098
13.5	0.672136	0.575996	0.287774	0.302026	0.204286	0.19255
14.5	0.330373	0.060187	0.255691	0.366609	0.292159	0.427893
15.5	0.301204	0.654213	0.691288	0.447922	0.319769	0.434365
16.5	0.478137	0.122285	0.009761	0.366131	0.400595	0.510873
17.5	0.328803	0.26555	0.343532	0.516727	1.03344	0.305127
18.5	0.138362	-0.02538	0.13629	-0.16412	-0.00411	0.445645
19.5	0.186818	0.444345	-0.09162	0.205964	0.354518	0.157454
20.5	0.751065	0.259885	-0.17697	0.314135	0.276985	0.204626
21.5	0.428296	0.232608	0.260302	0.07445	0.167273	0.196119
22.5	-0.36698	0.095357	-0.00379	-0.14702	-0.20189	0.508924
23.5	-0.39543	0.171671	-0.07345	-0.0731	0.225876	0.209627
24.5	-0.27151	-0.23078	0.400699	-0.1048	-0.01314	0.13994
25.5	-0.83499	0.363932	-0.26536	0.094751	-0.39264	-0.27853
26.5	-0.433	-0.01768	0.173616	-0.10855	-0.05407	-0.27339
27.5	0.14227	-0.20529	-0.29886	-0.18964	-0.06361	0.139317
28.5	0.26931	-0.51432	-0.00406	0.036289	-0.71228	-0.395
29.5	-0.63464	-0.46884	-0.28937	-0.44173	-0.19919	-0.10437
30.5	0.3892	-0.08466	-0.4802	-0.25389	-0.53202	-0.57699
31.5	-0.18381	-0.38031	-0.17189	-0.4355	-0.41587	0.035769
32.5	-0.17321	-0.74174	-0.06485	-0.71479	-0.0254	0.169659
33.5	-0.01029	-0.19455	-0.37393	-0.17666	-0.42093	-0.64995
34.5	-0.46181	-0.27899	0.003096	-0.415	-0.09667	-0.35492
35.5	-0.52132	0.108521	-0.06092	-0.38271	-0.0556	-0.34675
36.5	-0.00364	0.081815	-0.02503	0.07459	-0.23837	0.082812
37.5	0.254479	0.521486	0.14425	0.224524	0.067034	0.387385
38.5	-0.01338	0.198988	0.09204	0.092077	0.137716	0.521406
39.5	0.115803	0.277063	0.490324	0.152445	0.096159	0.155688
40.5	0.191272	0.036225	-0.03872	0.315393	0.240243	0.344576
41.5	0.263847	0.358502	0.18131	-0.25422	0.007857	0.322693
42.5	-0.13767	0.24041	0.505082	0.18373	0.187103	0.034888
43.5	0.13682	-0.06941	-0.09385	0.016446	0.314357	0.252853
44.5	0.243416	-0.15863	0.199639	0.027162	0.351361	0.19529
45.5	0.636499	0.078448	0.112396	-0.10233	-0.29833	0.032087
46.5	0.05273	0.115353	0.15339	-0.09453	0.01211	0.092413
47.5	-0.1877	0.291356	0.128743	0.018126	-0.23098	0.189269
48.5	0.270084	0.516033	0.258152	0.14227	0.132788	-0.20004
49.5	0.312871	0.602473	0.18959	0.29236	0.189367	-0.20044
50.5	0.097192	0.578131	0.26776	0.494329	0.460036	-0.20923
51.5	0.369054	0.294805	0.175972	0.266657	0.127468	0.018244
52.5	0.311121	0.048049	0.004351			0.130547
53.5	0.206346	0.177963	-0.07666		0.058917	-0.11933
54.5	0.307226	0.33578	-0.14084		0.0684	0.069882
55.5	0.152367	-0.39445	-0.02649		-0.21133	-0.14529
56.5	-0.34201	-0.15398	-0.50081		-0.24318	-0.22405
57.5	-0.30264	-0.15418	-0.59292		-0.3224	-0.58189
58.5	-0.14863	-0.22738	-0.00244		-0.44156	-0.27346
59.5	-0.39802	-0.1814	-0.22068		-0.16173	-0.26219
60.5	0.124263	0.140205	-0.27771		-0.01915	-0.47238
61.5	0.239957	0.163908	-0.05406		-0.14216	0.153705
62.5	-0.06331	-0.06254	-0.20367		-0.01152	0.110934
63.5	0.330713	-0.09886	0.389915		0.700794	0.299209
64.5	0.178742	-0.00119	0.522321		-0.08977	0.014034
65.5	-0.10892	0.086565	-0.30291		0.131854	0.337275
66.5	0.311333	0.561897	0.162299		0.236602	0.4732
67.5	0.277123	0.297715	0.138597		0.156308	0.146602
68.5	0.131286	0.066798	0.187988		-0.59729	0.346083
69.5	-0.06378	0.03459	0.420383		0.456814	0.164553
70.5	-0.27748	-0.02347	-0.07149		0.02973	0.110255
71.5	-0.1748	0.160603	-0.23724		0.067274	0.22448
72.5	0.004699	0.391573	-0.11373		0.236587	0.550252
73.5	-0.33901	-0.07901	-0.1547		-0.08157	0.077617
74.5	0.251415	-0.07561	0.128474		0.354989	0.070252
75.5	0.109705	-0.58339	0.160121		-0.44337	-0.406
76.5	-0.52918	-0.40057	-0.80278		0.210989	-0.16952
77.5	-0.28486	-0.15233	0.057366		-0.28526	0.011779
78.5	-0.0526	0.022339	-0.10752		-0.23374	-0.73647
79.5	-0.01121	-0.62735	-0.40674		0.050266	-0.28531
80.5	0.062171	-0.03723	-0.4191		-0.01497	-0.07314
81.5	-0.05046	-0.79968	-0.16557		0.337831	-0.42839
82.5	-0.20584	-0.4255	-0.45215		-0.05442	-0.28393
83.5	-0.15392	-0.5436	0.23344		-0.40282	-0.25461
84.5	-0.33692	-9.88e-05	-0.20716		-0.305	-0.54857
85.5	-0.02186	0.460354	0.149325		0.180509	0.079704
86.5	-0.10924	0.124169	0.218765		0.111539	-0.03542
87.5	-0.07841	-0.45089	0.02369		0.415379	0.151993
88.5	0.171296	-0.17703	-0.17983		-0.22896	-0.2293
89.5	0.03248	0.093107	0.196456		-0.03776	-0.15803
90.5	0.397831	0.196655	-0.0043		0.311138	-0.57506
91.5	-0.07006	-0.20166	0.166907		0.17851	0.17099
92.5	0.428033	0.138632	0.229468		-0.0433	0.200746
93.5	-0.00052	-0.02507	0.665304		0.016669	0.151971
94.5	0.049021	-0.04863	-0.00364		-0.14613	0.369144
95.5	-0.33105	0.181747	-0.29723		0.129031	0.378787
