# Supplementary material for: Cold-inducible RNA-binding protein (CIRBP) adjusts clock-gene expression and REM-sleep recovery following sleep deprivation
Source: eLife. 2019 Feb 5;8:e43400. doi: 10.7554/eLife.43400 (PMC6379088; doi:10.7554/eLife.43400)
Supplement: Figure 3—source data 1. [file elife-43400-fig3-data1.xlsx]

## Sheet: Fig3A-B-D-E-F
For every hour in each individual mouse is depicted: amount of waking [minutes per hour column D], amount of activity [raw counts; column E] and the average cortical temperature [column F]
These data can be used to reconstruct Figure 3A, B, D, E and F
mID = mouseID
Genotype	mID	Hour	Waking	LMA	NormTemp
KO	TC01	1	14.87	5	34.9051
KO	TC01	2	14	1	34.6151
KO	TC01	3	22.2	2	34.6651
KO	TC01	4	14.2	0	34.5151
KO	TC01	5	8.2	0	34.4451
KO	TC01	6	24.87	12	34.5251
KO	TC01	7	39.87	4	35.2351
KO	TC01	8	14.4	0	34.4951
KO	TC01	9	36.13	11	34.9451
KO	TC01	10	9.8	0	34.5651
KO	TC01	11	28.93	5	34.9751
KO	TC01	12	41.6	22	35.5051
KO	TC01	13	59.4	175	36.3051
KO	TC01	14	60	181	36.4851
KO	TC01	15	31.8	30	35.8051
KO	TC01	16	60	206	36.4651
KO	TC01	17	42	73	36.1451
KO	TC01	18	53.13	56	36.2151
KO	TC01	19	48.53	71	36.1951
KO	TC01	20	51.47	54	36.1151
KO	TC01	21	12.93	1	34.9851
KO	TC01	22	37.27	29	35.4051
KO	TC01	23	41.8	53	35.8251
KO	TC01	24	46.6	77	35.8151
KO	TC01	25	17.87	4	34.9651
KO	TC01	26	17.87	0	34.6351
KO	TC01	27	18.47	6	34.6351
KO	TC01	28	36.33	21	35.1351
KO	TC01	29	10.33	0	34.6151
KO	TC01	30	16.2	0	34.5551
KO	TC01	31	21.27	6	34.5551
KO	TC01	32	31.53	8	34.7951
KO	TC01	33	16.6	0	34.4951
KO	TC01	34	25.13	5	34.7451
KO	TC01	35	24.4	10	34.8551
KO	TC01	36	43.13	33	35.5251
KO	TC01	37	52.93	280	36.0251
KO	TC01	38	60	247	36.4351
KO	TC01	39	45.07	82	35.9651
KO	TC01	40	60	194	36.4251
KO	TC01	41	41.2	82	36.1051
KO	TC01	42	53.13	110	36.1951
KO	TC01	43	41.2	28	35.8951
KO	TC01	44	43.4	70	35.7851
KO	TC01	45	29.07	6	35.5651
KO	TC01	46	33.93	22	35.3951
KO	TC01	47	45	62	35.8651
KO	TC01	48	60	117	36.2151
KO	TC01	49	60	73	36.5651
KO	TC01	50	59.8	77	36.5651
KO	TC01	51	60	342	36.8651
KO	TC01	52	60	280	36.8651
KO	TC01	53	59.27	235	36.6751
KO	TC01	54	60	434	36.6851
KO	TC01	55	31.73	66	35.5751
KO	TC01	56	4.8	0	34.1951
KO	TC01	57	29.4	27	34.8051
KO	TC01	58	18.2	11	34.7451
KO	TC01	59	28.33	17	34.9751
KO	TC01	60	19.93	12	35.1251
KO	TC01	61	57.13	196	36.1551
KO	TC01	62	37.27	100	35.8651
KO	TC01	63	29.13	30	35.6151
KO	TC01	64	51.53	182	36.0751
KO	TC01	65	27.87	55	35.5751
KO	TC01	66	41.4	158	36.0051
KO	TC01	67	60	256	36.5051
KO	TC01	68	41.27	112	35.7551
KO	TC01	69	13.4	0	34.8451
KO	TC01	70	38	73	35.5351
KO	TC01	71	39.07	90	35.8051
KO	TC01	72	60	210	36.3951
KO	TC01	73	24.93	13	35.2151
KO	TC01	74	13.73	0	34.7351
KO	TC01	75	17.6	6	34.8651
KO	TC01	76	30.33	22	34.8951
KO	TC01	77	28.87	25	35.2151
KO	TC01	78	16.33	9	34.6051
KO	TC01	79	24.27	0	34.9151
KO	TC01	80	19.6	2	34.8551
KO	TC01	81	43.53	22	35.3451
KO	TC01	82	11.2	1	34.6751
KO	TC01	83	19.07	5	34.8751
KO	TC01	84	38.33	22	35.4051
KO	TC01	85	56	370	36.1551
KO	TC01	86	58.13	386	36.3551
KO	TC01	87	44.53	176	35.9651
KO	TC01	88	57.13	259	36.2951
KO	TC01	89	57.53	269	36.3851
KO	TC01	90	35.73	132	35.7351
KO	TC01	91	59.47	200	36.5151
KO	TC01	92	25.93	5	35.4151
KO	TC01	93	40.33	111	35.7851
KO	TC01	94	20.67	16	35.2051
KO	TC01	95	46	85	35.6651
KO	TC01	96	42.33	128	35.7151
WT	TC03	1	33.6	9	34.96
WT	TC03	2	35.53	23	34.79
WT	TC03	3	5.07	3	33.93
WT	TC03	4	28.4	17	34.13
WT	TC03	5	16.8	3	34.23
WT	TC03	6	14.27	36	34.23
WT	TC03	7	20.6	13	34.33
WT	TC03	8	8.73	6	34.09
WT	TC03	9	30.67	34	34.35
WT	TC03	10	30.27	35	34.13
WT	TC03	11	20.33	5	33.85
WT	TC03	12	32	40	34.57
WT	TC03	13	49	38	35.61
WT	TC03	14	34.87	8	35.62
WT	TC03	15	37.33	11	35.4
WT	TC03	16	46.93	23	35.79
WT	TC03	17	36.47	8	35.48
WT	TC03	18	35.67	19	35.41
WT	TC03	19	42	44	35.55
WT	TC03	20	45.2	27	35.64
WT	TC03	21	10.13	2	34.66
WT	TC03	22	20.53	3	34.78
WT	TC03	23	40.93	17	34.88
WT	TC03	24	60	67	35.68
WT	TC03	25	38.73	159	35.2
WT	TC03	26	36.4	101	34.49
WT	TC03	27	21.8	58	34.24
WT	TC03	28	15.53	11	34.38
WT	TC03	29	11.67	3	34.26
WT	TC03	30	34.33	53	34.53
WT	TC03	31	7.67	3	34.15
WT	TC03	32	11.93	6	33.84
WT	TC03	33	10.67	0	33.74
WT	TC03	34	17.4	0	34.11
WT	TC03	35	26.87	5	34.16
WT	TC03	36	40.33	19	34.72
WT	TC03	37	49.27	37	35.63
WT	TC03	38	49.8	62	35.98
WT	TC03	39	33.07	23	35
WT	TC03	40	54.27	41	35.93
WT	TC03	41	36.13	14	35.25
WT	TC03	42	45.87	48	35.82
WT	TC03	43	41.8	52	35.29
WT	TC03	44	40.4	32	35.45
WT	TC03	45	31.07	5	35.01
WT	TC03	46	14.73	5	34.79
WT	TC03	47	27	12	34.77
WT	TC03	48	54.47	97	35.76
WT	TC03	49	60	90	36.39
WT	TC03	50	60	171	36.53
WT	TC03	51	59.47	213	36.33
WT	TC03	52	59.4	126	36.52
WT	TC03	53	56.87	80	36.31
WT	TC03	54	58.4	140	36.34
WT	TC03	55	29.67	39	35.26
WT	TC03	56	14.6	5	34.3
WT	TC03	57	26.93	6	34.3
WT	TC03	58	23.8	4	34.19
WT	TC03	59	19.73	8	34.25
WT	TC03	60	33.47	12	34.55
WT	TC03	61	47	34	35.67
WT	TC03	62	28.87	23	35.1
WT	TC03	63	44.47	18	35.31
WT	TC03	64	30.93	20	35.25
WT	TC03	65	31.07	25	35.13
WT	TC03	66	59.13	52	35.9
WT	TC03	67	16.8	4	34.54
WT	TC03	68	15.93	4	34.47
WT	TC03	69	25.93	5	34.72
WT	TC03	70	31.67	4	34.7
WT	TC03	71	40.33	42	35.07
WT	TC03	72	60	87	35.94
WT	TC03	73	33.13	18	34.99
WT	TC03	74	34.13	10	34.61
WT	TC03	75	7.27	0	34.06
WT	TC03	76	20	0	34.31
WT	TC03	77	28	60	34.41
WT	TC03	78	23.33	28	34.38
WT	TC03	79	17.8	0	34.08
WT	TC03	80	16.13	0	34.07
WT	TC03	81	16.67	0	34.16
WT	TC03	82	25.53	0	34.32
WT	TC03	83	25.67	8	34.42
WT	TC03	84	32.87	15	34.8
WT	TC03	85	59.67	141	35.84
WT	TC03	86	57.2	58	35.94
WT	TC03	87	39.53	23	35.13
WT	TC03	88	41.4	50	35.33
WT	TC03	89	33.53	14	35.14
WT	TC03	90	57.6	30	35.91
WT	TC03	91	18.53	2	34.65
WT	TC03	92	44.8	12	35.26
WT	TC03	93	15.6	5	34.62
WT	TC03	94	32.67	6	34.84
WT	TC03	95	37.13	30	35.24
WT	TC03	96	49.6	144	35.51
WT	TC06	1	28.73	10	35.46
WT	TC06	2	34.93	7	35.28
WT	TC06	3	8.6	0	34.73
WT	TC06	4	34.6	10	35.06
WT	TC06	5	18.33	0	34.72
WT	TC06	6	18.07	0	34.5
WT	TC06	7	28.73	3	34.79
WT	TC06	8	19.93	0	34.6
WT	TC06	9	11.53	0	34.74
WT	TC06	10	27.4	1	34.89
WT	TC06	11	30.8	3	34.98
WT	TC06	12	30.07	6	35.51
WT	TC06	13	58.87	114	36.95
WT	TC06	14	34.87	37	36.34
WT	TC06	15	39.93	29	35.97
WT	TC06	16	24.47	2	35.74
WT	TC06	17	53.53	67	36.61
WT	TC06	18	39.53	52	36.24
WT	TC06	19	52.8	117	36.52
WT	TC06	20	18.13	21	35.48
WT	TC06	21	25.47	45	35.69
WT	TC06	22	30.4	26	35.79
WT	TC06	23	39.4	58	36.08
WT	TC06	24	43.4	29	36.2
WT	TC06	25	26.13	9	35.05
WT	TC06	26	11.6	7	35
WT	TC06	27	20.67	6	35.02
WT	TC06	28	21	10	34.89
WT	TC06	29	24.87	9	34.72
WT	TC06	30	24.4	15	34.8
WT	TC06	31	12.8	12	34.64
WT	TC06	32	25.87	6	34.85
WT	TC06	33	29.8	18	34.75
WT	TC06	34	18.8	10	34.81
WT	TC06	35	24.33	14	34.98
WT	TC06	36	31.2	9	35.57
WT	TC06	37	60	119	36.87
WT	TC06	38	38.2	36	36.4
WT	TC06	39	49.73	95	36.61
WT	TC06	40	47.53	93	36.61
WT	TC06	41	45.8	53	36.23
WT	TC06	42	36.6	61	36.25
WT	TC06	43	24.73	45	35.64
WT	TC06	44	28.4	70	35.53
WT	TC06	45	32.8	88	35.64
WT	TC06	46	33.4	103	35.92
WT	TC06	47	51	59	36.5
WT	TC06	48	43.8	47	36.4
WT	TC06	49	59.93	53	37.18
WT	TC06	50	60	50	37.26
WT	TC06	51	59.8	75	37.29
WT	TC06	52	57.13	138	37.01
WT	TC06	53	54.2	89	36.6
WT	TC06	54	58.27	86	36.86
WT	TC06	55	15.6	9	35.19
WT	TC06	56	14.2	4	34.35
WT	TC06	57	17.07	14	34.8
WT	TC06	58	17.6	2	34.69
WT	TC06	59	25.47	10	35.04
WT	TC06	60	31.93	6	35.26
WT	TC06	61	52.93	134	36.71
WT	TC06	62	46.93	83	36.46
WT	TC06	63	25.73	50	35.39
WT	TC06	64	29	16	35.35
WT	TC06	65	44.53	43	36.12
WT	TC06	66	27.53	32	35.56
WT	TC06	67	14.13	12	35.36
WT	TC06	68	25.53	15	35.61
WT	TC06	69	22.93	2	35.1
WT	TC06	70	29.93	23	35.56
WT	TC06	71	46.07	43	36.15
WT	TC06	72	45.2	48	36.32
WT	TC06	73	12.4	5	35.06
WT	TC06	74	23.47	16	35.16
WT	TC06	75	23	2	34.96
WT	TC06	76	45.87	22	35.49
WT	TC06	77	25.53	5	34.8
WT	TC06	78	15.47	5	34.66
WT	TC06	79	14.8	2	34.76
WT	TC06	80	31.73	16	34.92
WT	TC06	81	8.33	0	34.43
WT	TC06	82	35.6	25	34.94
WT	TC06	83	22.73	17	34.79
WT	TC06	84	35.73	23	35.19
WT	TC06	85	60	179	36.85
WT	TC06	86	48.2	135	36.87
WT	TC06	87	37.27	36	35.97
WT	TC06	88	42.07	79	35.67
WT	TC06	89	54.47	81	36.37
WT	TC06	90	31.13	40	35.73
WT	TC06	91	15.67	18	35.1
WT	TC06	92	49.53	100	36.21
WT	TC06	93	32.2	45	35.83
WT	TC06	94	33.47	32	35.67
WT	TC06	95	29.27	19	35.43
WT	TC06	96	30	35	35.76
KO	TC07	1	20.2	21	35.24
KO	TC07	2	20.33	13	34.9
KO	TC07	3	25.47	52	35.19
KO	TC07	4	13.33	0	34.71
KO	TC07	5	8	0	34.65
KO	TC07	6	38.4	25	35.37
KO	TC07	7	12.8	0	34.92
KO	TC07	8	27.53	18	35.02
KO	TC07	9	10.07	3	34.77
KO	TC07	10	27.47	6	34.95
KO	TC07	11	29.8	3	35.46
KO	TC07	12	41.93	44	35.97
KO	TC07	13	60	187	37.01
KO	TC07	14	49.47	101	36.88
KO	TC07	15	60	106	36.96
KO	TC07	16	60	72	37.16
KO	TC07	17	60	195	37.11
KO	TC07	18	42.73	49	36.21
KO	TC07	19	36.4	46	35.68
KO	TC07	20	42.33	60	36.2
KO	TC07	21	23.87	38	35.33
KO	TC07	22	24.13	40	35.71
KO	TC07	23	56.67	110	36.41
KO	TC07	24	60	101	37.01
KO	TC07	25	39.93	24	35.85
KO	TC07	26	24.87	49	35.09
KO	TC07	27	35.2	59	35.57
KO	TC07	28	34.87	64	35.06
KO	TC07	29	10.67	11	34.78
KO	TC07	30	7.07	5	34.85
KO	TC07	31	42.73	63	35.38
KO	TC07	32	10.6	37	34.8
KO	TC07	33	25.47	19	35.07
KO	TC07	34	14.87	9	34.81
KO	TC07	35	30.73	42	35.26
KO	TC07	36	33.33	48	35.52
KO	TC07	37	60	163	36.96
KO	TC07	38	60	135	37.19
KO	TC07	39	59.53	102	37.16
KO	TC07	40	39.4	61	36.4
KO	TC07	41	60	149	37.2
KO	TC07	42	58.67	218	36.98
KO	TC07	43	13.33	20	35.13
KO	TC07	44	40.8	83	35.7
KO	TC07	45	39.13	107	36
KO	TC07	46	8.13	11	34.81
KO	TC07	47	59.73	144	36.4
KO	TC07	48	60	103	36.93
KO	TC07	49	60	102	37.4
KO	TC07	50	58.8	97	37.08
KO	TC07	51	60	391	37.34
KO	TC07	52	59.4	373	37.69
KO	TC07	53	58.73	181	37.38
KO	TC07	54	59.47	251	37.37
KO	TC07	55	37.8	120	36.6
KO	TC07	56	21.93	45	35.85
KO	TC07	57	42.67	139	36.17
KO	TC07	58	26.87	52	36.22
KO	TC07	59	24.07	22	36.04
KO	TC07	60	29.67	55	36.08
KO	TC07	61	50.07	110	36.83
KO	TC07	62	34.8	66	36.55
KO	TC07	63	47.6	89	37.06
KO	TC07	64	59.33	108	37.03
KO	TC07	65	59	141	37.42
KO	TC07	66	30.8	61	36.5
KO	TC07	67	18.47	7	35.63
KO	TC07	68	49.27	117	36.55
KO	TC07	69	28.47	43	36.03
KO	TC07	70	18.2	9	35.09
KO	TC07	71	38.73	99	36.21
KO	TC07	72	60	255	37.32
KO	TC07	73	60	195	37.14
KO	TC07	74	55.73	163	36.57
KO	TC07	75	11.73	0	35.08
KO	TC07	76	22.27	3	35.33
KO	TC07	77	6.47	0	35.23
KO	TC07	78	38.73	89	35.77
KO	TC07	79	11.73	0	35.07
KO	TC07	80	29.27	6	35.25
KO	TC07	81	17.93	3	35.17
KO	TC07	82	29.53	19	35.51
KO	TC07	83	27.73	21	35.7
KO	TC07	84	33.8	53	36.13
KO	TC07	85	59.93	228	37.13
KO	TC07	86	59.8	113	37.04
KO	TC07	87	59.73	193	37.19
KO	TC07	88	45.73	115	36.46
KO	TC07	89	23.2	48	35.38
KO	TC07	90	59.6	128	36.93
KO	TC07	91	29.87	10	36.01
KO	TC07	92	52.8	87	36.65
KO	TC07	93	12.47	3	35.36
KO	TC07	94	46.33	98	36.37
KO	TC07	95	50.67	80	36.47
KO	TC07	96	60	158	36.98
WT	TC08	1	22.53	4	34.9611
WT	TC08	2	16.07	7	34.8911
WT	TC08	3	12.4	0	34.5511
WT	TC08	4	10.47	0	34.7411
WT	TC08	5	47.8	26	35.3411
WT	TC08	6	9.73	0	34.5711
WT	TC08	7	30.8	2	34.7311
WT	TC08	8	23.67	6	34.6111
WT	TC08	9	24.6	5	34.7511
WT	TC08	10	15.2	1	34.7311
WT	TC08	11	35.8	14	35.2011
WT	TC08	12	26.8	5	35.3911
WT	TC08	13	56.2	92	36.5011
WT	TC08	14	47.07	59	36.4011
WT	TC08	15	32.4	47	35.8211
WT	TC08	16	22.47	13	35.7311
WT	TC08	17	48.53	95	36.2411
WT	TC08	18	28.13	19	35.6411
WT	TC08	19	36.53	20	35.7411
WT	TC08	20	25.07	6	34.9711
WT	TC08	21	42.47	52	35.7611
WT	TC08	22	35.8	7	35.7111
WT	TC08	23	25.13	6	35.0611
WT	TC08	24	38.67	33	35.6711
WT	TC08	25	13.27	0	34.8811
WT	TC08	26	21.33	12	34.7211
WT	TC08	27	17.4	0	34.7811
WT	TC08	28	25.93	0	34.5711
WT	TC08	29	9.2	0	34.3511
WT	TC08	30	22	1	34.5311
WT	TC08	31	33.07	12	34.9411
WT	TC08	32	16	4	34.5111
WT	TC08	33	20.6	0	34.6411
WT	TC08	34	29.2	2	34.7311
WT	TC08	35	24.53	7	35.0611
WT	TC08	36	34.93	24	35.5111
WT	TC08	37	60	142	36.6511
WT	TC08	38	48.87	74	36.3511
WT	TC08	39	43.47	38	36.0211
WT	TC08	40	20.33	5	35.3611
WT	TC08	41	45.07	61	36.0111
WT	TC08	42	43.6	32	36.0911
WT	TC08	43	22.07	7	35.4711
WT	TC08	44	32.67	29	35.4211
WT	TC08	45	21.13	1	34.9911
WT	TC08	46	25.6	32	35.3711
WT	TC08	47	32.27	16	35.5811
WT	TC08	48	43	47	36.0711
WT	TC08	49	59.53	57	36.7811
WT	TC08	50	60	99	36.8111
WT	TC08	51	60	207	37.0011
WT	TC08	52	58.07	104	36.7411
WT	TC08	53	59.13	89	36.5811
WT	TC08	54	58.8	110	36.5211
WT	TC08	55	32.53	44	35.4211
WT	TC08	56	15.73	18	34.7411
WT	TC08	57	28.93	33	34.8911
WT	TC08	58	40.6	29	35.2011
WT	TC08	59	19.2	2	34.7611
WT	TC08	60	33.13	10	35.1811
WT	TC08	61	51.13	116	36.0711
WT	TC08	62	42.2	112	35.9811
WT	TC08	63	48.33	102	36.0311
WT	TC08	64	21.2	12	35.3711
WT	TC08	65	25.67	15	35.7011
WT	TC08	66	56.27	126	36.2311
WT	TC08	67	28.87	18	35.4811
WT	TC08	68	19.73	2	34.9211
WT	TC08	69	20.13	5	35.0511
WT	TC08	70	19.13	0	35.0811
WT	TC08	71	27.53	17	35.1911
WT	TC08	72	49.67	62	35.9711
WT	TC08	73	43.27	25	35.7511
WT	TC08	74	19.27	18	34.7811
WT	TC08	75	12.07	5	34.6411
WT	TC08	76	13.4	1	34.6811
WT	TC08	77	49.27	66	35.4011
WT	TC08	78	15.93	3	34.7211
WT	TC08	79	15.8	7	34.6011
WT	TC08	80	29.87	20	34.9611
WT	TC08	81	31.13	9	34.9011
WT	TC08	82	24.13	12	34.9311
WT	TC08	83	32.67	31	35.0711
WT	TC08	84	30.2	9	35.5211
WT	TC08	85	59.27	169	36.4711
WT	TC08	86	53.87	83	36.5411
WT	TC08	87	37.07	27	35.8811
WT	TC08	88	28.53	28	35.3811
WT	TC08	89	38.47	25	35.5211
WT	TC08	90	29.53	33	35.6111
WT	TC08	91	41.8	75	35.9611
WT	TC08	92	29.47	12	35.4611
WT	TC08	93	27.6	18	35.5011
WT	TC08	94	20.27	0	35.3611
WT	TC08	95	33.93	71	35.6711
WT	TC08	96	41.33	36	35.5511
WT	TC09	1	12.33	0	34.43
WT	TC09	2	20	6	34.64
WT	TC09	3	24.07	4	34.69
WT	TC09	4	40.67	14	35.26
WT	TC09	5	17.33	0	34.48
WT	TC09	6	15.87	0	34.17
WT	TC09	7	8.8	0	34.02
WT	TC09	8	26	3	34.16
WT	TC09	9	17.6	0	34.01
WT	TC09	10	25.93	6	34.58
WT	TC09	11	23.53	4	34.43
WT	TC09	12	29.4	17	34.82
WT	TC09	13	58.07	173	36.45
WT	TC09	14	59.6	225	36.74
WT	TC09	15	59.73	163	36.76
WT	TC09	16	53.47	94	36.55
WT	TC09	17	58.4	113	36.66
WT	TC09	18	28.47	10	35.46
WT	TC09	19	41.2	67	35.47
WT	TC09	20	46.53	99	36.08
WT	TC09	21	11	0	34.43
WT	TC09	22	27.2	17	35.03
WT	TC09	23	59.13	248	36.29
WT	TC09	24	45.07	56	35.67
WT	TC09	25	33.53	8	34.99
WT	TC09	26	10.33	0	34.19
WT	TC09	27	22.8	5	34.56
WT	TC09	28	19.47	7	34.38
WT	TC09	29	10.93	0	34.15
WT	TC09	30	30	6	34.5
WT	TC09	31	13.07	1	33.96
WT	TC09	32	23.53	4	34.24
WT	TC09	33	27.4	3	34.07
WT	TC09	34	22.2	12	34.55
WT	TC09	35	31.93	14	34.69
WT	TC09	36	30.4	12	34.65
WT	TC09	37	59.73	215	36.51
WT	TC09	38	60	343	36.74
WT	TC09	39	60	268	36.57
WT	TC09	40	58.73	150	36.5
WT	TC09	41	36.53	82	35.81
WT	TC09	42	55	198	36.01
WT	TC09	43	39.07	61	35.73
WT	TC09	44	18.47	5	34.52
WT	TC09	45	26.07	17	34.94
WT	TC09	46	53.87	86	36
WT	TC09	47	24.07	36	34.82
WT	TC09	48	43.07	55	35.69
WT	TC09	49	59.87	84	36.44
WT	TC09	50	59.73	81	36.58
WT	TC09	51	60	66	36.76
WT	TC09	52	59.8	331	36.77
WT	TC09	53	57.73	NA	36.66
WT	TC09	54	59.87	NA	36.7
WT	TC09	55	13.93	NA	34.87
WT	TC09	56	19.6	NA	34.25
WT	TC09	57	12.67	NA	34.34
WT	TC09	58	13.8	NA	34.1
WT	TC09	59	29.73	NA	34.45
WT	TC09	60	20.73	NA	34.36
WT	TC09	61	58.27	NA	36.22
WT	TC09	62	60	NA	36.41
WT	TC09	63	41.4	NA	35.8
WT	TC09	64	53.07	NA	36.28
WT	TC09	65	41.67	NA	36.12
WT	TC09	66	15.67	NA	34.85
WT	TC09	67	60	NA	36.54
WT	TC09	68	28.07	NA	35
WT	TC09	69	20.47	NA	34.57
WT	TC09	70	20.53	NA	34.61
WT	TC09	71	47.67	NA	35.84
WT	TC09	72	44.53	NA	36
WT	TC09	73	21.67	NA	34.67
WT	TC09	74	18.47	NA	34.7
WT	TC09	75	29.73	NA	34.87
WT	TC09	76	7.53	NA	34.11
WT	TC09	77	26.67	NA	34.53
WT	TC09	78	15.53	NA	34.33
WT	TC09	79	17.93	NA	34.1
WT	TC09	80	22.27	NA	34.33
WT	TC09	81	23.6	NA	34.16
WT	TC09	82	22.47	NA	33.95
WT	TC09	83	28.47	NA	34.6
WT	TC09	84	31	NA	34.86
WT	TC09	85	60	NA	36.53
WT	TC09	86	60	NA	36.73
WT	TC09	87	60	NA	36.66
WT	TC09	88	59.8	NA	36.5
WT	TC09	89	46.87	NA	35.66
WT	TC09	90	40.33	NA	35.91
WT	TC09	91	27.2	NA	34.93
WT	TC09	92	36.73	NA	35.31
WT	TC09	93	34.07	NA	35.42
WT	TC09	94	33.07	NA	35.33
WT	TC09	95	32.13	NA	35.34
WT	TC09	96	39.8	NA	35.25
WT	TC12	1	34.33	21	35.6631
WT	TC12	2	33.6	82	34.8831
WT	TC12	3	25.27	6	34.7431
WT	TC12	4	9.33	0	34.3531
WT	TC12	5	37.27	15	35.1031
WT	TC12	6	20.27	0	34.6231
WT	TC12	7	12.4	1	34.4631
WT	TC12	8	43.13	69	35.0531
WT	TC12	9	9.4	1	34.3631
WT	TC12	10	22.6	4	34.4031
WT	TC12	11	26.8	4	34.8731
WT	TC12	12	29.33	16	35.2431
WT	TC12	13	55	124	36.3631
WT	TC12	14	60	205	36.7931
WT	TC12	15	56.6	143	36.7131
WT	TC12	16	50.47	133	36.5231
WT	TC12	17	55.33	147	36.7831
WT	TC12	18	13.67	0	35.3831
WT	TC12	19	56.13	97	36.3431
WT	TC12	20	35.53	35	35.8531
WT	TC12	21	9.33	0	34.4931
WT	TC12	22	24.47	3	35.0031
WT	TC12	23	39.27	61	35.5031
WT	TC12	24	48.8	125	36.3631
WT	TC12	25	28.53	13	35.1131
WT	TC12	26	25.93	26	34.7131
WT	TC12	27	39.47	79	35.6931
WT	TC12	28	13	3	34.3331
WT	TC12	29	41.87	134	35.1931
WT	TC12	30	19.6	17	34.6031
WT	TC12	31	22.33	11	34.3431
WT	TC12	32	21.67	11	34.4331
WT	TC12	33	15.93	19	34.6131
WT	TC12	34	25.33	29	34.6731
WT	TC12	35	21.4	9	34.7231
WT	TC12	36	30.13	5	35.0231
WT	TC12	37	58.4	228	36.3131
WT	TC12	38	59.73	200	36.6431
WT	TC12	39	45.4	74	36.0831
WT	TC12	40	58.53	215	36.6431
WT	TC12	41	43.33	105	36.1631
WT	TC12	42	42.13	101	35.8831
WT	TC12	43	58.67	159	36.6931
WT	TC12	44	24.47	18	35.3231
WT	TC12	45	18.53	3	34.9731
WT	TC12	46	38.93	52	35.3731
WT	TC12	47	42.13	55	35.8031
WT	TC12	48	43.33	69	35.6331
WT	TC12	49	60	63	36.5431
WT	TC12	50	60	117	36.6931
WT	TC12	51	60	334	37.1231
WT	TC12	52	59.73	296	36.7631
WT	TC12	53	53.93	NA	36.4131
WT	TC12	54	59.8	237	36.6631
WT	TC12	55	14.73	16	34.6331
WT	TC12	56	12.2	0	34.0931
WT	TC12	57	13.4	4	34.1831
WT	TC12	58	17	5	34.2731
WT	TC12	59	30.13	36	34.8631
WT	TC12	60	21.33	3	34.5631
WT	TC12	61	49.6	123	36.1431
WT	TC12	62	53.2	101	36.1131
WT	TC12	63	35.8	50	35.5431
WT	TC12	64	16.93	20	35.3931
WT	TC12	65	58.73	126	36.3831
WT	TC12	66	46.07	100	36.1431
WT	TC12	67	24.73	16	35.2431
WT	TC12	68	12	7	34.5331
WT	TC12	69	44.67	69	35.3131
WT	TC12	70	19	12	35.2031
WT	TC12	71	28.87	45	35.3131
WT	TC12	72	53.6	106	36.3431
WT	TC12	73	16.27	6	34.8131
WT	TC12	74	52.13	65	36.0731
WT	TC12	75	6.47	0	34.4831
WT	TC12	76	35.27	37	35.0531
WT	TC12	77	6.6	0	34.3431
WT	TC12	78	22.13	9	34.5631
WT	TC12	79	24.93	4	34.6431
WT	TC12	80	15.73	1	34.5131
WT	TC12	81	17.93	7	34.6431
WT	TC12	82	11.07	3	34.6431
WT	TC12	83	24.6	7	34.8631
WT	TC12	84	34.27	33	35.0431
WT	TC12	85	59.93	194	36.2731
WT	TC12	86	60	256	36.8031
WT	TC12	87	59.33	212	36.6831
WT	TC12	88	36.27	45	35.9731
WT	TC12	89	53.47	209	36.1431
WT	TC12	90	60	237	36.5731
WT	TC12	91	33.27	31	35.7131
WT	TC12	92	8.67	5	34.3431
WT	TC12	93	24.07	4	34.8031
WT	TC12	94	38.27	108	35.7631
WT	TC12	95	47.8	140	35.9731
WT	TC12	96	37.73	40	35.7231
WT	TC13	1	9.27	0	35.01
WT	TC13	2	20	0	34.75
WT	TC13	3	20.87	4	34.75
WT	TC13	4	11.2	0	34.49
WT	TC13	5	10.67	0	34.38
WT	TC13	6	56.93	7	35.56
WT	TC13	7	8.33	0	34.39
WT	TC13	8	20.4	2	34.85
WT	TC13	9	25.67	3	34.92
WT	TC13	10	13.07	0	34.7
WT	TC13	11	25	0	35.04
WT	TC13	12	31.4	1	35.22
WT	TC13	13	51.2	31	36.32
WT	TC13	14	45.87	41	36.37
WT	TC13	15	38.2	19	36.24
WT	TC13	16	40.2	23	36.34
WT	TC13	17	50.4	47	36.86
WT	TC13	18	35.4	24	36.05
WT	TC13	19	29	7	35.82
WT	TC13	20	35.47	25	35.91
WT	TC13	21	26.6	9	35.52
WT	TC13	22	37	18	35.96
WT	TC13	23	18.13	2	35.39
WT	TC13	24	18.87	5	35.18
WT	TC13	25	10.13	0	34.68
WT	TC13	26	18.53	0	34.52
WT	TC13	27	22.2	6	34.84
WT	TC13	28	16	0	34.86
WT	TC13	29	33.4	9	35.16
WT	TC13	30	10.27	0	34.44
WT	TC13	31	24.67	4	34.59
WT	TC13	32	17.4	2	34.89
WT	TC13	33	13.93	2	34.89
WT	TC13	34	28.73	5	34.68
WT	TC13	35	27.67	3	34.89
WT	TC13	36	25.6	8	34.92
WT	TC13	37	46.07	39	36.26
WT	TC13	38	41.93	38	36.42
WT	TC13	39	40	31	36.46
WT	TC13	40	51.4	51	36.55
WT	TC13	41	42	41	36.39
WT	TC13	42	34.2	37	36.08
WT	TC13	43	50.87	41	36.38
WT	TC13	44	23.27	4	35.37
WT	TC13	45	30.67	22	35.76
WT	TC13	46	29.53	25	35.57
WT	TC13	47	34.2	25	35.8
WT	TC13	48	21.6	6	35.28
WT	TC13	49	60	37	36.43
WT	TC13	50	55.6	27	36.24
WT	TC13	51	59.8	136	36.61
WT	TC13	52	59.73	150	36.85
WT	TC13	53	57.87	55	36.75
WT	TC13	54	57.67	128	36.62
WT	TC13	55	14.8	5	34.87
WT	TC13	56	6.4	0	34.28
WT	TC13	57	16	6	34.64
WT	TC13	58	19.6	4	34.4
WT	TC13	59	12.33	2	34.38
WT	TC13	60	21.53	2	34.74
WT	TC13	61	42.33	19	35.48
WT	TC13	62	30.07	8	35.58
WT	TC13	63	33.73	21	35.78
WT	TC13	64	33.47	18	35.94
WT	TC13	65	50.67	23	36.27
WT	TC13	66	35.73	17	36.05
WT	TC13	67	27.47	13	35.86
WT	TC13	68	42	26	36.13
WT	TC13	69	17.73	0	35.12
WT	TC13	70	11.93	0	34.76
WT	TC13	71	33.73	5	35.61
WT	TC13	72	15.2	4	35.03
WT	TC13	73	6.87	0	34.99
WT	TC13	74	20.93	0	34.95
WT	TC13	75	6.87	0	34.51
WT	TC13	76	26.93	2	34.78
WT	TC13	77	22.8	5	34.95
WT	TC13	78	15.27	0	34.71
WT	TC13	79	25	6	34.48
WT	TC13	80	22	0	34.62
WT	TC13	81	11.53	0	34.51
WT	TC13	82	20	2	34.52
WT	TC13	83	28.07	2	34.94
WT	TC13	84	27.47	4	35.01
WT	TC13	85	53.8	40	35.89
WT	TC13	86	39.6	14	35.9
WT	TC13	87	44.33	23	36.01
WT	TC13	88	35.53	7	35.75
WT	TC13	89	14.33	0	34.44
WT	TC13	90	30.13	5	35.22
WT	TC13	91	37.2	5	35.04
WT	TC13	92	29.27	0	35.3
WT	TC13	93	35.27	2	35.66
WT	TC13	94	25.13	3	35.31
WT	TC13	95	29.33	0	35.5
WT	TC13	96	23.53	2	35.45
KO	TC15	1	42.8	1	35.34
KO	TC15	2	9.33	0	33.96
KO	TC15	3	44.33	37	34.75
KO	TC15	4	6.27	0	33.93
KO	TC15	5	21.67	2	34.28
KO	TC15	6	19.2	0	34.05
KO	TC15	7	9	0	34.22
KO	TC15	8	17.27	2	34.31
KO	TC15	9	23.53	0	34.17
KO	TC15	10	22.93	3	34.26
KO	TC15	11	16.27	0	34.13
KO	TC15	12	25.53	6	34.61
KO	TC15	13	59.87	90	36.05
KO	TC15	14	59.73	144	36.38
KO	TC15	15	58.93	123	36.32
KO	TC15	16	59.13	121	36.41
KO	TC15	17	59.07	140	36.36
KO	TC15	18	53.6	56	36.27
KO	TC15	19	14.13	0	34.38
KO	TC15	20	46.33	69	35.74
KO	TC15	21	24.93	26	34.64
KO	TC15	22	60	124	36.15
KO	TC15	23	26.27	38	34.42
KO	TC15	24	44.93	55	35.19
KO	TC15	25	31.73	5	34.79
KO	TC15	26	19.73	1	34.14
KO	TC15	27	19.07	8	34.5
KO	TC15	28	17.07	3	34.36
KO	TC15	29	9.47	0	33.93
KO	TC15	30	49	69	34.65
KO	TC15	31	14.47	1	34.18
KO	TC15	32	24.4	7	34.24
KO	TC15	33	10.67	0	34.35
KO	TC15	34	14.07	1	34.12
KO	TC15	35	33.2	9	34.39
KO	TC15	36	23.87	10	34.15
KO	TC15	37	52.73	69	35.67
KO	TC15	38	59.53	107	36.32
KO	TC15	39	52.27	82	36.2
KO	TC15	40	58.13	111	36.41
KO	TC15	41	28.93	38	35.29
KO	TC15	42	60	78	36.47
KO	TC15	43	44.93	28	35.61
KO	TC15	44	33.93	34	34.83
KO	TC15	45	30.53	6	35.26
KO	TC15	46	36.07	20	35.33
KO	TC15	47	39.07	52	35.6
KO	TC15	48	52.6	98	35.58
KO	TC15	49	60	50	36.34
KO	TC15	50	60	15	36.07
KO	TC15	51	60	103	36.63
KO	TC15	52	60	153	36.51
KO	TC15	53	59.2	58	36.26
KO	TC15	54	58.4	153	35.99
KO	TC15	55	13.67	26	34.22
KO	TC15	56	10.93	0	33.97
KO	TC15	57	24.6	7	34.09
KO	TC15	58	9	1	33.96
KO	TC15	59	22.2	3	34.02
KO	TC15	60	24.07	2	34.13
KO	TC15	61	49.2	66	35.5
KO	TC15	62	54	104	36.08
KO	TC15	63	54.73	106	36.09
KO	TC15	64	54.67	139	36.13
KO	TC15	65	25.13	43	35.26
KO	TC15	66	48.6	100	35.49
KO	TC15	67	58.87	142	36.2
KO	TC15	68	16.8	6	34.36
KO	TC15	69	16.6	8	34.1
KO	TC15	70	31.87	23	34.7
KO	TC15	71	22.93	34	34.43
KO	TC15	72	60	143	36.18
KO	TC15	73	27	11	34.73
KO	TC15	74	6.87	0	33.87
KO	TC15	75	23.53	8	34.3
KO	TC15	76	7.8	0	33.8
KO	TC15	77	45.53	13	34.78
KO	TC15	78	7.73	2	33.96
KO	TC15	79	37.07	7	34.51
KO	TC15	80	7.93	0	34.03
KO	TC15	81	23.53	2	34.23
KO	TC15	82	7.6	0	34.33
KO	TC15	83	27.53	4	34.45
KO	TC15	84	36.87	7	34.94
KO	TC15	85	59.53	174	36.16
KO	TC15	86	60	186	36.26
KO	TC15	87	59.67	184	36.3
KO	TC15	88	60	185	36.31
KO	TC15	89	53.27	134	36.2
KO	TC15	90	13.4	7	34.11
KO	TC15	91	60	150	35.96
KO	TC15	92	43.93	82	35.61
KO	TC15	93	20.8	20	34.19
KO	TC15	94	34	61	35.16
KO	TC15	95	33.87	29	34.59
KO	TC15	96	59.8	102	36.01
KO	TC16	1	6.93	1	34.15
KO	TC16	2	22.33	45	34.39
KO	TC16	3	27.27	21	34.76
KO	TC16	4	11.6	4	34.26
KO	TC16	5	22.8	17	34.67
KO	TC16	6	6.67	2	34.12
KO	TC16	7	20.13	2	34.4
KO	TC16	8	4.4	2	34.17
KO	TC16	9	35.93	16	34.81
KO	TC16	10	42.93	113	35.16
KO	TC16	11	24.13	7	35.06
KO	TC16	12	32.87	30	35.45
KO	TC16	13	60	381	36.47
KO	TC16	14	60	402	36.5
KO	TC16	15	60	361	36.52
KO	TC16	16	60	440	36.49
KO	TC16	17	60	396	36.51
KO	TC16	18	56.73	389	36.41
KO	TC16	19	53.6	313	36.2
KO	TC16	20	19.07	24	35.01
KO	TC16	21	60	305	36.09
KO	TC16	22	22.6	46	35.1
KO	TC16	23	52.13	228	35.54
KO	TC16	24	54.33	227	35.83
KO	TC16	25	3.87	1	34.14
KO	TC16	26	43.13	74	35.26
KO	TC16	27	22.87	26	34.35
KO	TC16	28	25.8	11	34.3
KO	TC16	29	5.53	0	34.3
KO	TC16	30	37.07	25	34.56
KO	TC16	31	8.8	0	34.2
KO	TC16	32	21.33	9	34.47
KO	TC16	33	18.33	11	34.4
KO	TC16	34	21.2	5	34.65
KO	TC16	35	41	42	35.37
KO	TC16	36	39.73	52	35.55
KO	TC16	37	60	405	36.58
KO	TC16	38	60	391	36.64
KO	TC16	39	60	358	36.62
KO	TC16	40	60	348	36.58
KO	TC16	41	59.87	366	36.47
KO	TC16	42	58.47	302	36.41
KO	TC16	43	48.53	193	36.07
KO	TC16	44	32.93	173	35.48
KO	TC16	45	36.93	183	34.99
KO	TC16	46	52.27	219	35.82
KO	TC16	47	8.53	6	34.45
KO	TC16	48	56.67	219	35.62
KO	TC16	49	54.73	49	36.12
KO	TC16	50	59.13	87	36.66
KO	TC16	51	60	288	36.8
KO	TC16	52	57.87	334	36.68
KO	TC16	53	49.73	203	36.48
KO	TC16	54	56.13	208	36.25
KO	TC16	55	25.33	71	35.04
KO	TC16	56	12.53	14	34.03
KO	TC16	57	18.2	21	34.42
KO	TC16	58	30.2	47	34.81
KO	TC16	59	29.6	36	34.81
KO	TC16	60	29.07	52	35.28
KO	TC16	61	59.93	422	36.46
KO	TC16	62	60	378	36.56
KO	TC16	63	59.87	444	36.58
KO	TC16	64	59.73	274	36.62
KO	TC16	65	48.13	225	36.31
KO	TC16	66	52.2	166	36.25
KO	TC16	67	19.73	30	34.53
KO	TC16	68	59.47	274	36.22
KO	TC16	69	14.53	15	34.53
KO	TC16	70	50.73	164	35.62
KO	TC16	71	45.2	172	35.68
KO	TC16	72	40.93	186	35.08
KO	TC16	73	23.33	24	34.47
KO	TC16	74	10.87	10	34.06
KO	TC16	75	12.6	8	34.27
KO	TC16	76	37	53	34.67
KO	TC16	77	14.4	4	34.35
KO	TC16	78	11.33	5	34.22
KO	TC16	79	23	10	34.45
KO	TC16	80	12.4	2	34.25
KO	TC16	81	45.67	37	35.1
KO	TC16	82	11.87	3	34.55
KO	TC16	83	31.87	23	35.32
KO	TC16	84	43.93	101	35.97
KO	TC16	85	60	450	36.67
KO	TC16	86	59.6	546	36.63
KO	TC16	87	60	468	36.56
KO	TC16	88	60	370	36.54
KO	TC16	89	58.8	361	36.42
KO	TC16	90	49.33	185	36.17
KO	TC16	91	40.67	131	35.56
KO	TC16	92	30.53	78	35.31
KO	TC16	93	43.07	211	35.39
KO	TC16	94	33.13	58	35.24
KO	TC16	95	19.13	44	34.66
KO	TC16	96	60	275	36.05
KO	TC17	1	21.4	8	35.3
KO	TC17	2	9.73	0	34.57
KO	TC17	3	27.93	2	35.01
KO	TC17	4	8.33	0	34.61
KO	TC17	5	54.53	86	35.56
KO	TC17	6	10.87	3	34.82
KO	TC17	7	32.13	34	35.12
KO	TC17	8	10.67	1	34.52
KO	TC17	9	9.93	5	34.31
KO	TC17	10	51.6	74	35.72
KO	TC17	11	22.53	6	34.75
KO	TC17	12	32.67	21	35.47
KO	TC17	13	60	176	36.58
KO	TC17	14	60	143	36.97
KO	TC17	15	41.8	43	36.27
KO	TC17	16	60	129	36.71
KO	TC17	17	42.07	63	36.24
KO	TC17	18	58.27	147	36.61
KO	TC17	19	20.47	39	35.67
KO	TC17	20	47.6	86	36.07
KO	TC17	21	28	48	35.8
KO	TC17	22	39.8	82	36.08
KO	TC17	23	31.33	44	35.81
KO	TC17	24	47.27	81	36.01
KO	TC17	25	7.07	5	35.24
KO	TC17	26	29.13	13	35.18
KO	TC17	27	37	31	35.48
KO	TC17	28	24.13	45	35.22
KO	TC17	29	10.87	4	34.63
KO	TC17	30	23.67	20	34.75
KO	TC17	31	20.8	18	34.86
KO	TC17	32	13.8	9	34.39
KO	TC17	33	23.4	8	34.96
KO	TC17	34	26.87	33	34.87
KO	TC17	35	39.8	49	35.37
KO	TC17	36	34.07	25	35.57
KO	TC17	37	60	247	36.63
KO	TC17	38	60	168	36.86
KO	TC17	39	41.8	89	36.44
KO	TC17	40	59.6	177	36.83
KO	TC17	41	35.4	57	36.4
KO	TC17	42	58.8	123	36.68
KO	TC17	43	20.33	10	35.84
KO	TC17	44	29	10	35.81
KO	TC17	45	53.93	123	36.35
KO	TC17	46	15.87	16	35.2
KO	TC17	47	36.67	43	35.76
KO	TC17	48	54.6	110	36.21
KO	TC17	49	58.6	32	36.58
KO	TC17	50	57.53	31	36.63
KO	TC17	51	60	218	37.04
KO	TC17	52	60	372	36.92
KO	TC17	53	51.87	110	36.69
KO	TC17	54	58.87	339	36.67
KO	TC17	55	13.73	22	35.17
KO	TC17	56	15	4	34.54
KO	TC17	57	14.47	7	34.67
KO	TC17	58	23	9	35.01
KO	TC17	59	26.27	45	35.06
KO	TC17	60	36.93	12	35.23
KO	TC17	61	60	246	36.4
KO	TC17	62	59.4	180	36.6
KO	TC17	63	45.73	143	36.5
KO	TC17	64	54.33	228	36.63
KO	TC17	65	55.53	158	36.72
KO	TC17	66	20.2	21	35.56
KO	TC17	67	22.53	6	35.4
KO	TC17	68	59.13	155	36.56
KO	TC17	69	18.73	0	35.31
KO	TC17	70	20.4	13	35.06
KO	TC17	71	24.93	11	35.51
KO	TC17	72	50.13	163	36.2
KO	TC17	73	27.07	17	35.52
KO	TC17	74	5.93	0	34.84
KO	TC17	75	21.87	8	34.86
KO	TC17	76	32.53	13	35.14
KO	TC17	77	16.8	2	34.78
KO	TC17	78	44.47	43	35.46
KO	TC17	79	14.87	3	34.7
KO	TC17	80	14.67	5	34.89
KO	TC17	81	8.07	2	34.58
KO	TC17	82	33.8	14	34.99
KO	TC17	83	22.2	9	35.12
KO	TC17	84	41.07	32	35.7
KO	TC17	85	60	225	36.74
KO	TC17	86	59.93	225	36.86
KO	TC17	87	44.47	116	36.5
KO	TC17	88	53.6	185	36.75
KO	TC17	89	57.6	126	36.53
KO	TC17	90	53.13	141	36.45
KO	TC17	91	13.07	0	35.38
KO	TC17	92	55.07	112	36.19
KO	TC17	93	28.33	21	35.59
KO	TC17	94	47.27	51	36.05
KO	TC17	95	40.53	71	35.86
KO	TC17	96	37.13	67	35.64
KO	TC19	1	37.33	24	35.59
KO	TC19	2	9.87	8	34.69
KO	TC19	3	36.33	29	35.15
KO	TC19	4	11.13	7	34.73
KO	TC19	5	9.93	0	34.69
KO	TC19	6	42.4	64	35.25
KO	TC19	7	7.27	0	34.81
KO	TC19	8	16.07	2	34.76
KO	TC19	9	29.2	21	34.85
KO	TC19	10	24.4	4	35.24
KO	TC19	11	34.67	40	35.5
KO	TC19	12	53.47	189	35.97
KO	TC19	13	59.8	187	36.54
KO	TC19	14	59.53	179	36.72
KO	TC19	15	52.73	159	36.35
KO	TC19	16	18.73	34	35.39
KO	TC19	17	55.53	158	36.38
KO	TC19	18	51.27	117	36.53
KO	TC19	19	21.2	20	35.28
KO	TC19	20	45.2	54	35.75
KO	TC19	21	13.6	13	35.09
KO	TC19	22	22.6	19	35.22
KO	TC19	23	48.8	102	35.98
KO	TC19	24	59.73	165	36.34
KO	TC19	25	16.73	3	35.05
KO	TC19	26	14.93	0	34.56
KO	TC19	27	10.4	1	34.41
KO	TC19	28	49.87	160	35.64
KO	TC19	29	29.2	70	34.9
KO	TC19	30	7.6	3	34.73
KO	TC19	31	14.93	6	34.57
KO	TC19	32	26.4	8	34.69
KO	TC19	33	14.67	9	34.45
KO	TC19	34	33.33	30	35.1
KO	TC19	35	26.13	44	34.9
KO	TC19	36	44.2	128	35.79
KO	TC19	37	59.8	195	36.59
KO	TC19	38	59.87	187	36.63
KO	TC19	39	58.73	208	36.63
KO	TC19	40	58.8	212	36.66
KO	TC19	41	9.73	13	35.12
KO	TC19	42	44.93	140	35.88
KO	TC19	43	59.73	173	36.68
KO	TC19	44	30.6	57	35.53
KO	TC19	45	24.2	3	34.74
KO	TC19	46	35.87	57	35.66
KO	TC19	47	29.6	42	35.5
KO	TC19	48	59.87	197	36.45
KO	TC19	49	57	37	36.31
KO	TC19	50	59.6	135	36.91
KO	TC19	51	60	233	37.07
KO	TC19	52	59.8	452	36.95
KO	TC19	53	53.2	121	36.66
KO	TC19	54	58	186	36.58
KO	TC19	55	13.4	23	34.87
KO	TC19	56	17.07	10	34.73
KO	TC19	57	23.93	23	34.86
KO	TC19	58	10.73	4	34.72
KO	TC19	59	33.93	43	35.58
KO	TC19	60	33.27	35	35.2
KO	TC19	61	59.4	222	36.41
KO	TC19	62	59.4	204	36.64
KO	TC19	63	59	226	36.6
KO	TC19	64	18	19	35.23
KO	TC19	65	45.53	131	35.83
KO	TC19	66	58.8	258	36.73
KO	TC19	67	31.2	75	35.76
KO	TC19	68	21.53	7	34.76
KO	TC19	69	4.93	0	34.71
KO	TC19	70	50.33	121	36
KO	TC19	71	42.2	114	35.65
KO	TC19	72	59.07	235	36.46
KO	TC19	73	18.47	18	35.05
KO	TC19	74	6.93	4	34.43
KO	TC19	75	25.47	15	34.8
KO	TC19	76	20.2	9	34.84
KO	TC19	77	39.93	34	35.28
KO	TC19	78	12.13	2	34.58
KO	TC19	79	20.33	8	34.77
KO	TC19	80	24.27	3	34.66
KO	TC19	81	24.73	8	34.91
KO	TC19	82	29.47	27	34.98
KO	TC19	83	21.73	22	34.95
KO	TC19	84	30.8	90	35.51
KO	TC19	85	60	280	36.7
KO	TC19	86	59.4	160	36.78
KO	TC19	87	59.47	210	36.69
KO	TC19	88	56.4	146	36.54
KO	TC19	89	25	17	35.09
KO	TC19	90	54.07	180	36.54
KO	TC19	91	45.8	181	36.01
KO	TC19	92	25.73	64	35.01
KO	TC19	93	31.07	95	35.59
KO	TC19	94	39.07	60	35.57
KO	TC19	95	17.53	17	35.1
KO	TC19	96	35.33	107	35.5

## Sheet: Fig3-C
Cortical temperature (Tcx) during a spontaneous waking bout compared to Tcx during sleep deprivation after spending an equal amount of time awake.
Tcx is based on the last 10 minutes of the waking bout
	GT	mID	BLLength	BLTemp	SDLength	SDTemp
1	KO	TC01	131.73	36.265	131.73	36.83
2	KO	TC07	223.67	36.02	223.67	37.5
4	KO	TC15	99.13	36.54	99.13	36.04
5	KO	TC16	318.73	36.56	270.27	36.05
6	KO	TC17	130.73	36.67	130.73	36.88
7	KO	TC19	99.87	36.64	99.87	36.93
8	WT	TC06	70.2	37.13	70.2	37.19
9	WT	TC03	101.73	35.75	101.73	36.55
10	WT	TC08	83.6	36.58	83.6	36.79
11	WT	TC09	202.27	36.48	202.27	36.8
12	WT	TC12	120.27	36.81	120.27	36.26
13	WT	TC13	47.07	36.81	47.07	36.46

## Sheet: Fig3-G
This data represents the amount of activity, corrected per unit of waking in WT mice.
Interval#	MeanTime	SEMTime	Mean_LogAct/Wake	SEM_LogAct/Wake
1	1.00972	0.119865	0.224763	0.0599208
2	3.06389	0.237021	0.340079	0.0973495
3	5.12222	0.159986	0.165449	0.0896546
4	7.28056	0.141629	0.269654	0.113292
5	9.40417	0.104677	0.164415	0.0684812
6	11.1917	0.0333333	0.245296	0.0748941
7	12.3514	0.0171346	1.10921	0.187069
8	13.0681	0.0411871	1.04722	0.242299
9	13.9306	0.0652866	0.842291	0.269376
10	14.9028	0.130502	0.765154	0.245446
11	15.8042	0.148304	0.790262	0.152402
12	16.6667	0.173899	0.968153	0.212957
13	17.6333	0.181863	0.665736	0.105532
14	18.6944	0.164973	0.717307	0.18085
15	19.8597	0.213323	0.707355	0.108358
16	21.2292	0.212162	0.367874	0.108217
17	22.4444	0.197738	0.910619	0.289461
18	23.4612	0.0943512	0.60549	0.156291
19	25.0333	0.0956702	0.420375	0.229083
20	27.1208	0.248372	0.474943	0.199518
21	29.2347	0.303837	0.448203	0.193619
22	31.45	0.23895	0.286123	0.0891646
23	33.5431	0.128478	0.346216	0.113245
24	35.2403	0.0555868	0.264504	0.0228135
25	36.3569	0.0154285	1.18418	0.215548
26	37.0986	0.040735	1.34129	0.235702
27	37.9306	0.0819233	1.02021	0.323915
28	38.7764	0.106097	1.10381	0.164946
29	39.65	0.0810807	0.874983	0.25779
30	40.5694	0.0981464	0.895342	0.156815
31	41.5528	0.110505	1.00479	0.188668
32	42.5764	0.1535	1.01531	0.20838
33	43.8236	0.162623	0.600264	0.256002
34	45.2375	0.115525	0.650333	0.15677
35	46.4347	0.104912	0.67096	0.0518757
36	47.4903	0.0569444	0.727728	0.140249
37	48.4875	0.00186339	0.822268	0.0988537
38	49.4722	0.00633431	1.01768	0.179016
39	50.4597	0.01167	1.34737	0.256701
40	51.45	0.0113855	1.62526	0.199127
41	52.4708	0.00468943	0.956148	0.0781524
42	53.4958	0.00186339	1.32163	0.172482
43	55.0792	0.019573	0.520773	0.12532
44	57.2292	0.0877642	0.330862	0.106821
45	59.1486	0.0876609	0.251592	0.0424483
46	60.3083	0.010319	0.975477	0.221111
47	61.0708	0.0536082	1.05208	0.260975
48	61.9542	0.10747	0.882591	0.197296
49	62.8444	0.118374	0.860964	0.154359
50	63.825	0.140386	0.434387	0.118907
51	64.7667	0.129225	0.884336	0.197555
52	65.675	0.126216	0.730047	0.171251
53	66.8472	0.213119	0.413107	0.0971362
54	68.1875	0.304912	0.389925	0.0864991
55	69.5319	0.288895	0.387627	0.172167
56	70.6681	0.200583	0.786413	0.212584
57	71.5569	0.0606453	0.660151	0.141949
58	72.9833	0.164429	0.428943	0.135416
59	75.0194	0.236767	0.275047	0.0819255
60	77.1528	0.256216	0.451259	0.147189
61	79.3125	0.180236	0.146076	0.075657
62	81.4431	0.0890125	0.237228	0.0888171
63	83.2445	0.051595	0.427372	0.0841548
64	84.3333	0.00986013	1.2652	0.180161
65	85.0056	0.0287604	1.38799	0.302185
66	85.7153	0.0388144	1.05633	0.335782
67	86.5181	0.0412432	0.719358	0.252439
68	87.4847	0.0792154	0.763297	0.184953
69	88.5278	0.0976024	0.712771	0.279905
70	89.4472	0.147348	0.913851	0.350903
71	90.4708	0.148304	0.771699	0.276976
72	91.7264	0.0649935	0.419737	0.228694
73	93.0653	0.0997083	0.486735	0.225903
74	94.3264	0.113965	0.7529	0.270017
75	95.4445	0.0572217	0.74649	0.250424
