# Supplementary material for: Cold-inducible RNA-binding protein (CIRBP) adjusts clock-gene expression and REM-sleep recovery following sleep deprivation
Source: eLife. 2019 Feb 5;8:e43400. doi: 10.7554/eLife.43400 (PMC6379088; doi:10.7554/eLife.43400)
Supplement: Figure 4—figure supplement 1—source data 1. [file elife-43400-fig4-figsupp1-data1.xlsx]

## Sheet: liver
column A	samples / mouseID
column B	genotype (WT or KO)
column C	condition (ZT0, ZT6-NSD, ZT6-SD)
Samples	GT	Treatment	Cirbp CNRQ	Rbm3Short CNRQ	Clock CNRQ	Dbp CNRQ	Hsf1 CNRQ	Hsp90b1 CNRQ	Hspa5 CNRQ	Per2 CNRQ	Nr1d1 CNRQ	Sfpq CNRQ	Sirt1 CNRQ
AE	WT	ZT0	1.35176	0.944718	0.542686	-4.8758	0.091737	-0.14501	0.622178	-0.554992	-2.09153	0.0527992	-0.272532
AJ	WT	ZT0	0.653379	0.721283	0.581058	-4.58712	-0.166069	-0.160885	0.270179	-1.40575	-1.98287	-0.0856005	-0.0501895
BC	WT	ZT0	0.427417	1.02793	0.311348	-5.81737	-0.025807	0.0964445	0.105274	-1.06135	-1.46406	0.0929748	-0.172577
Q	WT	ZT0	1.40029	0.780989	0.266358	-5.12098	-0.391837	-0.35777	1.35135	-0.830478	-1.85982	-0.581121	-0.495495
S	WT	ZT0	0.23349	0.73201	0.452072	-5.19646	-0.000410776	-0.22326	0.0888116	-0.874743	-0.514033	-0.2362	-0.0511962
AI	KO	ZT0	#VALUE!	1.17389	0.645156	-3.78367	-0.0254493	0.0384201	0.122288	-1.18681	-3.5031	0.0204274	-0.0723764
AO	KO	ZT0	#VALUE!	1.09955	0.495705	-5.13314	-0.198556	-0.285481	-0.3705	-1.06769	-1.03799	-0.248473	-0.0869535
AU	KO	ZT0	#VALUE!	1.52262	0.491841	-4.27239	0.0343815	0.0659683	-0.263525	-1.6463	-1.88852	0.0575381	0.280266
BE	KO	ZT0	#VALUE!	1.46474	0.449791	-4.98088	-0.0187214	0.327997	0.0727602	-1.07667	-2.33428	0.247706	-0.209212
K	KO	ZT0	#VALUE!	0.732467	0.0858858	-4.19318	-0.214079	0.120085	0.219608	-0.686199	-3.933	-0.140645	0.0788217
AF	WT	NSD	2.37479	2.77266	-0.47916	3.36713	0.0186215	-0.173684	-0.126305	0.956588	1.297	-0.0210147	-0.00550604
AL	WT	NSD	1.77466	2.36843	0.139633	2.82101	0.12102	0.106745	0.147985	0.970832	1.70496	0.0154454	0.504323
AX	WT	NSD	2.95123	3.63476	-0.247692	3.4716	0.161041	0.0223547	-0.581509	0.262105	1.63245	0.16897	0.443163
T	WT	NSD	1.51586	1.27453	-0.233711	2.05977	-0.156892	0.295084	-0.383962	-0.663125	1.05029	0.0497311	-0.000862075
Z	WT	NSD	1.01464	1.05479	0.20476	2.44866	0.308983	-0.0126724	-0.242944	0.484206	1.50912	0.0930885	-0.109055
AH	KO	NSD	#VALUE!	2.38658	0.269009	2.64044	-0.315643	0.40138	-0.146162	-0.021563	1.40123	-0.0239615	0.157315
AS	KO	NSD	-8.29684	2.22254	-0.079046	3.05594	-0.0953804	0.239312	0.350516	0.782289	1.26131	-0.0105071	0.0268396
AV	KO	NSD	#VALUE!	2.28307	-0.247395	2.7514	-0.189367	0.134913	-0.284948	0.827808	1.35199	-0.0291506	0.152589
J	KO	NSD	#VALUE!	2.20839	-0.665884	2.57495	0.0450031	0.215114	-0.038245	0.000537273	1.45922	0.164213	0.0860467
L	KO	NSD	#VALUE!	1.76073	-0.55554	2.35594	-0.272241	-0.334144	-0.459254	0.383411	1.45848	-0.551503	0.0121388
AM	WT	SD	-0.171492	0.616532	-0.0804159	2.93329	-0.0310066	0.140644	0.0286561	0.516352	0.847063	0.0144252	0.254136
AQ	WT	SD	-0.00566879	0.602256	-0.0876716	2.51709	0.33775	0.286095	-0.262292	0.843569	1.05978	0.547453	0.0554185
I	WT	SD	-0.806903	0.395232	0.0373957	2.38819	0.10894	-0.152854	-0.19629	0.530924	0.821488	-0.0699516	0.190843
P	WT	SD	-0.694594	0.407988	-0.51525	1.70277	0.0235021	-0.268138	-0.0847201	0.188021	0.704007	-0.259961	-0.365414
U	WT	SD	-3.72201	0.100643	-0.0822359	1.08701	0.532795	-0.569975	-0.1688	0.979884	0.741673	0.0907428	-0.315006
AN	KO	SD	#VALUE!	0.634449	-0.763118	3.24797	0.058602	0.58478	0.376756	1.01537	0.437079	0.116288	0.340974
AR	KO	SD	#VALUE!	0.729338	-0.216549	2.03399	-0.0932829	-0.276544	-0.0804506	1.04829	0.67167	0.0455083	-0.0923194
AZ	KO	SD	#VALUE!	0.83673	0.622139	1.92833	0.43436	0.176099	-0.935028	-0.54611	1.201	0.5374	0.714191
G	KO	SD	#VALUE!	0.680305	-1.00688	2.49216	0.0943358	-0.0606475	0.219815	1.25105	-0.217472	-0.204055	-0.317279
N	KO	SD	#VALUE!	0.493837	-0.334292	0.0833613	-0.176329	-0.230373	0.648758	0.580551	0.216858	0.147433	-0.681092
