# Supplementary material for: Cold-inducible RNA-binding protein (CIRBP) adjusts clock-gene expression and REM-sleep recovery following sleep deprivation
Source: eLife. 2019 Feb 5;8:e43400. doi: 10.7554/eLife.43400 (PMC6379088; doi:10.7554/eLife.43400)
Supplement: Figure 4—figure supplement 2—source data 1. [file elife-43400-fig4-figsupp2-data1.xlsx]

## Sheet: cortex
column A	samples / mouseID
column B	genotype (WT or KO)
column C	condition (ZT0, ZT6-NSD, ZT6-SD)
Samples	Genotype	Treatment	Homer1a CNRQ	Dusp4 CNRQ	Sirt1 CNRQ	Hsp90b1 CNRQ	Hspa5 CNRQ	Hsf1 CNRQ
AE	WT	ZT0	0.0287773	-0.424885	0.0265748	0.176746	0.124479	-0.0380522
AJ	WT	ZT0	0.0127658	0.690986	0.329745	0.823432	0.395453	0.23204
BC	WT	ZT0	0.183729	-0.582885	-0.13405	-1.28533	-1.28534	-0.791034
Q	WT	ZT0	-0.0269112	0.271397	-0.0644967	0.42325	0.267694	0.106081
S	WT	ZT0	0.36799	0.398636	0.102198	0.558882	0.278463	0.224665
AI	KO	ZT0	-0.869909	-0.741536	-0.127745	-1.47682	-0.786552	-0.481666
AO	KO	ZT0	-0.454346	-0.108	-0.261162	-0.989031	-0.758157	-0.440268
AU	KO	ZT0	0.0675024	-0.262838	-0.301953	-1.26651	-0.602578	-0.398381
BE	KO	ZT0	0.182783	-0.0808536	-0.10253	0.47012	0.341851	-0.105037
W	KO	ZT0	0.446242	-0.220275	-0.10609	0.359331	-0.109732	0.334535
AF	WT	NSD	-0.693367	0.200299	0.0637384	0.0154128	-0.177613	0.215271
AL	WT	NSD	-1.61071	-0.192134	0.339433	-0.172114	-0.155829	0.0705661
AX	WT	NSD	-0.765649	-0.694292	-0.176657	0.00810486	-0.554506	-0.305723
T	WT	NSD	-0.816725	-0.636661	-0.0278121	0.0127938	-0.201063	0.00870342
Z	WT	NSD	-1.13621	-0.672303	-0.0899644	0.0105948	-0.352445	0.0148421
AH	KO	NSD	-0.982909	-0.95766	0.0780937	0.0858686	-0.37873	-0.335847
AS	KO	NSD	-0.941675	-0.755252	0.0235091	-1.21151	-0.804955	-0.425288
AV	KO	NSD	-0.695548	-0.491055	-0.0800513	0.189281	-0.374837	-0.0231259
J	KO	NSD	-0.645254	-0.928262	-0.169536	-1.08191	-0.956802	-0.499099
L	KO	NSD	-1.06732	-0.398363	-0.289118	0.333938	-0.249188	0.102955
AM	WT	SD	0.793898	0.394769	0.113351	-0.0322599	0.469591	0.158924
AQ	WT	SD	0.912059	0.355758	0.231462	-0.63871	0.0807538	0.12117
I	WT	SD	1.23774	0.693138	-0.0326538	0.602304	0.866298	0.411541
P	WT	SD	1.00268	0.939031	-0.124326	0.511771	0.459236	0.21976
U	WT	SD	1.06105	0.575268	-0.165206	-0.501291	0.522581	0.34455
AN	KO	SD	0.598163	0.776168	0.778905	1.14152	1.1448	0.47651
AR	KO	SD	1.29633	0.916833	0.19876	1.00449	0.767246	0.392517
AZ	KO	SD	0.520015	0.51392	0.0352067	0.568884	0.332269	0.134272
G	KO	SD	1.00483	0.801299	-0.095761	0.649532	1.05846	0.217898
N	KO	SD	0.989983	0.619754	0.0281363	0.709227	0.639147	0.056722
