# Supplementary material for: Cold-inducible RNA-binding protein (CIRBP) adjusts clock-gene expression and REM-sleep recovery following sleep deprivation
Source: eLife. 2019 Feb 5;8:e43400. doi: 10.7554/eLife.43400 (PMC6379088; doi:10.7554/eLife.43400)
Supplement: Figure 4—source data 1. [file elife-43400-fig4-data1.xlsx]

## Sheet: Fig4-A
column A	samples / mouseID
column B	genotype (WT or KO)
column C	condition (ZT0, ZT6-NSD, ZT6-SD)
Samples	Genotype	Treatment	Cirbp CNRQ	Rbm3Long CNRQ	Rbm3Short CNRQ
AE	WT	ZT0	3.11931	0.201172	-0.335776
AJ	WT	ZT0	3.20355	0.326819	-0.148172
BC	WT	ZT0	2.09462	-0.243669	0.110943
Q	WT	ZT0	3.08676	-0.710384	-0.756042
S	WT	ZT0	4.05962	-0.0320244	-0.0679384
AI	KO	ZT0	-8.73663	0.385572	-0.251487
AO	KO	ZT0	-7.38751	0.513038	0.0770514
AU	KO	ZT0	#VALUE!	-0.0176248	0.375174
BE	KO	ZT0	-8.23038	0.593196	0.269834
W	KO	ZT0	-9.89408	-1.69691	-1.77583
AF	WT	NSD	3.93467	-0.827666	0.327791
AL	WT	NSD	4.33189	0.930358	1.29206
AX	WT	NSD	4.08049	-0.399734	1.33276
T	WT	NSD	4.51677	-0.309593	0.391527
Z	WT	NSD	3.94295	-1.26889	0.212239
AH	KO	NSD	-8.2991	-0.813758	0.759133
AS	KO	NSD	#VALUE!	-0.342837	0.634386
AV	KO	NSD	#VALUE!	-1.1045	0.745607
J	KO	NSD	#VALUE!	-0.193902	1.01125
L	KO	NSD	#VALUE!	-0.739281	0.621457
AM	WT	SD	2.50937	1.16429	-0.376222
AQ	WT	SD	2.86806	0.80491	-0.305746
I	WT	SD	3.31448	-0.918513	-1.61645
P	WT	SD	3.17005	0.469498	-0.543728
U	WT	SD	3.58726	1.01864	-0.0604698
AN	KO	SD	#VALUE!	2.14694	0.0804944
AR	KO	SD	#VALUE!	0.745967	0.140671
AZ	KO	SD	#VALUE!	0.173881	-0.520525
G	KO	SD	-9.27216	-0.498645	-0.936139
N	KO	SD	#VALUE!	0.64364	-0.687854

## Sheet: Fig4-B
column A	samples / mouseID
column B	genotype (WT or KO)
column C	condition (ZT0, ZT6-NSD, ZT6-SD)
Samples	Genotype	Treatment	Sfpq CNRQ	Cortex ratio Ext/Comm		Samples	Genotype	Treatment	Liver ratio Ext/Comm
AE	WT	ZT0	0.346467	0.146732		AE	wt	ZT0	0.0302428
AJ	WT	ZT0	0.389258	0.126058		AJ	wt	ZT0	0.0311029
BC	WT	ZT0	-0.72046	0.479266		BC	wt	ZT0	0.0328093
Q	WT	ZT0	-0.113673	0.0988562		Q	wt	ZT0	0.0304207
S	WT	ZT0	0.402093	0.124823		S	wt	ZT0	0.0408805
AI	KO	ZT0	-0.442985	0.320043		AI	ko	ZT0	0.0336391
AO	KO	ZT0	-0.320085	0.19723		AO	ko	ZT0	0.0428229
AU	KO	ZT0	-0.634683	0.216757		AU	ko	ZT0	0.0438203
BE	KO	ZT0	-0.14327	0.142491		BE	ko	ZT0	0.038793
W	KO	ZT0	-0.00181039	0.132907		K	ko	ZT0	0.0311558
AF	WT	NSD	-0.0223564	0.138921		AF	wt	NSD	0.050123
AL	WT	NSD	0.257948	0.136669		AL	wt	NSD	0.0461814
AX	WT	NSD	0.0377217	0.130167		AX	wt	NSD	0.0573284
T	WT	NSD	-0.26421	0.14559		T	wt	NSD	0.0424556
Z	WT	NSD	-0.113511	0.134608		Z	wt	NSD	0.0320188
AH	KO	NSD	-0.157782	0.154002		AH	ko	NSD	0.0448684
AS	KO	NSD	-0.342142	0.339979		AS	ko	NSD	0.0487247
AV	KO	NSD	0.0150515	0.114353		AV	ko	NSD	0.0411425
J	KO	NSD	-0.668588	0.283253		J	ko	NSD	0.0416074
L	KO	NSD	-0.0973017	0.11569		L	ko	NSD	0.0567058
AM	WT	SD	0.00888989	0.149647		AM	wt	SD	0.0327477
AQ	WT	SD	-0.0565124	0.2187		AQ	wt	SD	0.0248966
I	WT	SD	0.211523	0.129695		I	wt	SD	0.0327704
P	WT	SD	0.174374	0.156564		P	wt	SD	0.0236618
U	WT	SD	0.31123	0.178426		U	wt	SD	0.0282804
AN	KO	SD	0.839791	0.0984137		AN	ko	SD	0.0208922
AR	KO	SD	0.688478	0.121506		AR	ko	SD	0.0304175
AZ	KO	SD	0.114509	0.11939		AZ	ko	SD	0.0485183
G	KO	SD	0.334919	0.102259		G	ko	SD	0.0313347
N	KO	SD	-0.0328844	0.144805		N	ko	SD	0.0261967

## Sheet: Fig4-C
column A	samples / mouseID
column B	genotype (WT or KO)
column C	condition (ZT0, ZT6-NSD, ZT6-SD)
Samples	Genotype	Treatment	Clock CNRQ	Dbp CNRQ	Npas2 CNRQ	Per2 CNRQ	Nr1d1 CNRQ
AE	WT	ZT0	0.281037	-0.538064	0.0705894	-0.030603	-0.442773
AJ	WT	ZT0	0.727636	-0.631141	0.581252	0.195481	-0.421674
BC	WT	ZT0	-1.26412	-0.868942	-0.900466	0.128004	-0.80056
Q	WT	ZT0	0.114272	-0.496818	0.147238	0.0617671	-0.192048
S	WT	ZT0	0.278443	0.0994502	0.294041	0.460578	-0.0941449
AI	KO	ZT0	-0.756071	-0.469871	-1.21898	-0.449861	-1.16499
AO	KO	ZT0	-0.347432	-0.861933	-0.538342	-0.513212	-0.85792
AU	KO	ZT0	-0.921445	-0.481732	-0.657665	-0.598902	-0.475457
BE	KO	ZT0	0.35894	-0.163234	0.399243	0.146218	-0.129208
W	KO	ZT0	0.0153901	-0.584447	0.452558	-0.0720005	-0.332622
AF	WT	NSD	0.233725	0.700177	0.318925	-0.0195823	0.721413
AL	WT	NSD	0.362906	0.677599	-0.266096	-0.694232	0.30341
AX	WT	NSD	-0.172421	0.622863	0.112443	-0.452625	0.681672
T	WT	NSD	0.0096546	0.581639	0.212399	-1.0076	0.44906
Z	WT	NSD	0.0926043	0.145938	0.367481	-0.396887	0.682091
AH	KO	NSD	0.149442	0.453263	0.170211	-0.19469	0.548331
AS	KO	NSD	-0.940566	0.896528	-0.983015	-0.466566	0.394796
AV	KO	NSD	0.237931	0.798648	0.381101	-0.0439192	0.770245
J	KO	NSD	-0.702516	0.885474	-0.99297	-0.334051	-0.428582
L	KO	NSD	0.227366	0.745386	0.0723031	-0.329009	0.446525
AM	WT	SD	-0.341204	0.134149	0.212164	0.190375	-0.00804784
AQ	WT	SD	-0.242462	-0.10454	-0.448244	0.377531	-0.305128
I	WT	SD	0.309993	0.0171272	0.701204	0.299033	0.149627
P	WT	SD	0.262434	-0.358478	0.145521	0.407115	-0.108461
U	WT	SD	-0.511439	-0.19532	-0.641118	0.555867	-0.846624
AN	KO	SD	0.679455	-0.140028	0.0686393	0.382619	0.291527
AR	KO	SD	0.638077	-0.0939885	0.57386	0.628938	0.222446
AZ	KO	SD	0.479508	-0.49369	0.374958	0.556947	0.434122
G	KO	SD	0.48752	-0.00573178	0.694695	0.714048	0.189874
N	KO	SD	0.253343	-0.270285	0.296069	0.499219	0.323099
