# Supplementary material for: Cold-inducible RNA-binding protein (CIRBP) adjusts clock-gene expression and REM-sleep recovery following sleep deprivation
Source: eLife. 2019 Feb 5;8:e43400. doi: 10.7554/eLife.43400 (PMC6379088; doi:10.7554/eLife.43400)
Supplement: Figure 5—source data 1. [file elife-43400-fig5-data1.xlsx]

## Sheet: Fig4A_NREMdeltaPower+ProcessS
Data represent averages per genotype ± 1SEM
	NREM DELTA POWER									PROCESS S
	WT				KO						WT		KO
	Time	Time+/-SEM	NREMdeltaPower	NREMdeltapower+/-SEM	Time	Time+/-SEM	NREMdeltaPower	NREMdeltapower+/-SEM		Time[hrs]	procesS	procesS±1SEM	procesS	procesS±1SEM
	0.50296	0.0343211	123.404	3.20114	0.619624	0.0547718	129.204	3.0349		0.25	126.622	2.68686	131.712	3.19581
	1.43143	0.0553262	113.903	2.04232	1.40328	0.055936	109.619	1.62997		0.5	124.491	2.66734	130.066	3.49132
	2.34165	0.0624079	104.505	1.42133	2.37578	0.0708418	102.727	2.15538		0.75	121.594	2.2165	126.223	3.06189
	3.28558	0.0664084	103.181	1.41155	3.30181	0.0592391	102.459	1.81437		1	117.762	1.96539	122.022	2.82339
	4.25945	0.0811342	102.318	2.03955	4.33363	0.0757265	104.364	2.51311		1.25	115.32	1.77967	118.712	2.49033
	5.22666	0.0578971	100.647	1.39094	5.27434	0.0772962	102.109	2.38655		1.5	113.789	1.90536	115.678	2.21443
	6.22964	0.0489505	103.302	1.86873	6.21323	0.0843203	100.236	1.68129		1.75	112.666	1.98422	112.603	2.08756
	7.15945	0.0542987	99.5199	1.73124	7.1059	0.0716002	98.5327	1.89244		2	111.135	1.99176	110.463	1.78186
	8.04167	0.0551854	95.6691	1.6169	8.09116	0.0741284	95.5008	1.65411		2.25	109.069	1.97515	110.661	1.66123
	9.0835	0.0516735	96.9399	1.7281	8.9823	0.0795934	96.5245	1.51218		2.5	106.785	1.72939	110.333	1.87143
	10.1289	0.0356721	94.9944	1.4023	10.0427	0.0592389	96.914	1.78496		2.75	105.17	1.39165	109.025	2.23678
	11.2795	0.0294893	96.4895	1.26855	11.1754	0.056705	96.5824	1.33637		3	103.734	1.4821	107.145	1.96806
	14.6063	0.202554	128.057	3.215	15.4898	0.440366	134.062	5.62596		3.25	102.177	1.50341	105.189	1.72184
	16.7832	0.239266	126.997	3.35003	17.4591	0.340798	136.261	5.34455		3.5	101.365	1.47953	102.985	1.70645
	18.6321	0.214621	127.124	3.58723	19.0749	0.207912	133.636	3.92911		3.75	100.165	1.67539	101.463	1.67297
	20.0704	0.121645	122.449	2.50891	20.3381	0.14259	124.336	3.12651		4	99.4996	1.90179	101.075	1.71897
	21.3996	0.122346	117.755	2.15082	21.4869	0.130263	120.202	4.30206		4.25	99.3921	1.86753	100.986	2.00151
	22.9623	0.101017	121.276	2.76777	22.691	0.127131	121.557	3.19925		4.5	99.3183	1.58816	101.583	2.17214
	24.5153	0.0372112	126.425	2.83919	24.582	0.0681099	132.569	3.05645		4.75	98.8315	1.50897	100.262	2.29891
	25.424	0.0472595	113.26	2.24447	25.4175	0.0669372	118.5	2.20897		5	97.4914	1.48315	99.7324	2.50397
	26.4217	0.0608696	111.398	1.76953	26.4519	0.0965798	110.54	1.29629		5.25	96.3549	1.30332	98.424	2.42288
	27.3818	0.0587627	104.063	1.8422	27.4239	0.0895285	108.182	2.05021		5.5	95.4955	1.28484	97.2309	2.28977
	28.3303	0.0567675	104.161	2.00765	28.4006	0.0770091	108.139	2.67592		5.75	95.0839	1.02899	95.6881	1.99507
	29.3061	0.0626824	105.38	1.74521	29.3431	0.0834599	106.243	2.46065		6	94.7561	1.15943	95.5925	1.74002
	30.2525	0.0577576	105.544	1.72429	30.3626	0.0620429	106.926	2.27039		6.25	94.606	1.23584	95.076	1.61258
	31.2148	0.0489449	100.178	1.81643	31.2697	0.0514369	101.064	2.26233		6.5	94.4345	1.24572	94.8943	1.78574
	32.1498	0.0378442	99.6201	1.33452	32.1953	0.0601991	98.8647	1.84107		6.75	93.8354	1.32668	94.0461	1.94647
	33.1051	0.045125	97.5142	1.3623	33.1002	0.0548575	97.2159	2.03176		7	92.9766	1.28406	93.1057	1.94173
	34.1246	0.0332289	99.8591	1.05525	34.1086	0.0438155	96.6699	2.02118		7.25	91.8804	1.38371	91.7978	1.78595
	35.2908	0.0285775	100.043	1.60451	35.2535	0.0323215	100.248	1.66896		7.5	91.1209	1.19926	91.2186	1.83335
	38.81	0.284848	132.04	4.83756	39.1253	0.334713	130.117	4.79039		7.75	90.3874	1.16698	91.018	1.84694
	40.8526	0.28328	129.745	3.87606	41.3377	0.292309	139.92	5.10447		8	90.4305	1.49197	90.6469	1.93097
	42.7008	0.193115	131.646	3.05511	42.9156	0.18634	136.067	4.0155		8.25	89.8803	1.31596	89.8341	1.9042
	44.0296	0.143107	122.284	2.96846	44.344	0.15299	134.855	3.06476		8.5	89.3507	1.23863	89.9498	1.89567
	45.3348	0.130709	118.601	3.09097	45.4184	0.108883	124.621	3.06117		8.75	90.049	1.16541	89.55	2.04679
	46.8304	0.132859	122.448	3.18422	46.6166	0.138806	119.213	4.65693		9	90.1744	1.16276	88.7038	1.94219
	54.4463	0.0216119	193.449	5.37042	54.5379	0.042051	196.869	4.96802		9.25	89.6565	0.991465	89.2478	1.85409
	55.0359	0.0230455	148.934	2.97497	55.1263	0.0456757	156.931	5.0455		9.5	90.6279	1.05854	89.9666	1.76169
	55.6966	0.0292621	134.814	2.46588	55.7011	0.0466864	134.384	4.05719		9.75	90.1047	1.08692	89.7793	1.84435
	56.4235	0.0359689	125.856	2.12056	56.4473	0.060052	127.875	4.23451		10	89.5574	0.985177	89.2463	1.74937
	57.1147	0.0414147	115.427	1.9999	57.1709	0.0570856	121.378	3.39099		10.25	89.8887	0.975042	89.2744	1.71592
	57.8988	0.0376513	111.386	1.68352	57.8723	0.0563246	112.188	2.3768		10.5	90.0124	1.24024	89.4001	1.57634
	58.6346	0.036104	107.977	1.80836	58.6523	0.0443101	111.573	2.27776		10.75	89.8042	1.13355	89.1662	1.67457
	59.5026	0.0212987	105.929	2.18808	59.507	0.0256565	108.823	3.34071		11	91.4004	1.24045	89.4123	1.51374
	61.8427	0.160415	113.202	2.69905	62.4951	0.287418	117.515	3.75925		11.25	91.6958	1.07286	90.575	1.70417
	64.0551	0.246081	115.878	1.96438	64.9868	0.282924	123.671	3.20598		11.5	92.2986	1.10183	91.5921	1.82791
	65.9978	0.245631	114.454	2.29354	66.7581	0.193764	122.769	2.78466		11.75	92.5121	0.95256	92.641	1.88561
	67.7172	0.148695	115.113	2.44602	68.1453	0.0997936	119.563	2.27337		12	94.0391	1.04994	94.0435	2.04056
	69.1369	0.167379	109.559	1.95065	69.2806	0.096339	110.828	2.08423		12.25	97.2288	1.29845	97.2708	2.05046
	70.6479	0.166519	110.351	2.5765	70.5612	0.132832	107.988	2.88853		12.5	101.295	1.54622	101	2.17813
	72.4839	0.0450692	121.807	2.86445	72.7556	0.103703	128.034	2.6023		12.75	104.811	1.74469	104.777	2.32582
	73.3408	0.0574412	109.268	1.83665	73.5239	0.112091	113.439	2.41245		13	108.258	1.9712	108.174	2.46608
	74.2975	0.0676989	106.931	2.09198	74.3693	0.109637	103.213	1.95197		13.25	111.424	2.31887	110.216	2.47231
	75.2271	0.0773758	102.385	1.8247	75.2958	0.101866	103.412	2.39884		13.5	114.179	2.45279	112.836	2.58014
	76.1853	0.0712311	100.611	1.66584	76.3212	0.0873288	102.74	2.15435		13.75	115.573	2.42516	115.47	2.78898
	77.243	0.055877	104.778	1.83734	77.4111	0.0798337	103.068	2.30981		14	116.69	2.40409	117.379	2.92023
	78.1556	0.0471501	99.7101	1.93565	78.3515	0.079083	101.966	2.02674		14.25	117.597	2.29562	119.422	2.95941
	79.1789	0.0445898	98.9871	1.60831	79.2648	0.072029	98.5337	1.74426		14.5	117.638	2.24667	120.295	3.18541
	80.1372	0.0348298	98.2038	1.41076	80.1533	0.0739737	95.6693	2.05751		14.75	118.803	2.4945	121.216	3.44048
	81.0855	0.035783	96.7425	1.418	81.179	0.0505387	96.5331	1.12794		15	121.674	2.6097	122.916	3.53759
	82.1481	0.0256333	96.2683	1.10426	82.1502	0.0527065	95.4854	1.12638		15.25	122.596	2.41317	125.766	3.54821
	83.312	0.0199507	97.1437	1.15619	83.2878	0.0316328	98.6241	1.20178		15.5	123.209	2.4408	128.003	3.66774
	86.7871	0.197524	127.402	3.58423	87.8285	0.392639	136.182	4.87959		15.75	123.878	2.53964	128.821	3.53498
	88.9172	0.242506	128.327	3.6469	89.7897	0.341778	136.34	4.25309		16	124.769	2.7723	129.839	3.90898
	90.529	0.185942	124.178	3.00336	91.2643	0.205547	135.085	3.10676		16.25	126.397	3.11073	131.007	3.91814
	92.0143	0.149154	123.293	3.29203	92.4695	0.125745	128.211	3.04392		16.5	127.951	3.4646	131.954	4.00881
	93.346	0.1593	120.923	2.26228	93.5304	0.122395	124.954	3.37439		16.75	129.235	3.64453	132.9	3.86613
	94.8482	0.155574	118.909	2.43661	94.6513	0.126514	117.466	2.53924		17	129.78	3.40129	133.867	4.0004
										17.25	128.602	2.90097	136.233	4.12645
										17.5	128.393	2.38623	138.684	4.38471
										17.75	128.599	2.03223	140.536	4.49022
										18	128.516	2.26551	140.538	4.40185
										18.25	129.072	2.57921	139.105	4.31818
										18.5	128.749	2.67422	137.523	4.00568
										18.75	129.356	2.70095	136.507	3.93168
										19	129.397	2.95133	134.85	3.81829
										19.25	129.977	2.79922	135.041	3.99175
										19.5	129.721	2.77011	135.214	4.23171
										19.75	128.493	2.85657	135.617	4.42767
										20	126.673	2.43713	133.773	4.03263
										20.25	125.148	2.4079	130.494	3.71307
										20.5	124.806	2.28438	127.681	3.12308
										20.75	123.404	1.89073	125.45	2.78195
										21	121.815	1.7928	124.697	3.05671
										21.25	119.931	1.75077	124.5	2.89716
										21.5	120.678	1.80272	123.852	3.05384
										21.75	121.942	2.05792	123.26	3.02623
										22	121.953	2.26043	122.707	3.11882
										22.25	122.062	2.31635	124.036	3.13815
										22.5	121.088	2.14125	123.969	2.91724
										22.75	121.886	2.11594	123.99	2.56547
										23	122.999	2.13366	124.155	2.40216
										23.25	125.407	2.14745	124.948	2.47933
										23.5	125.68	2.25512	127.617	2.54134
										23.75	126.508	2.5064	129.494	2.77592
										24	126.46	2.43318	130.4	3.05366
										24.25	124.397	2.58558	130.533	3.02078
										24.5	121.436	2.3229	127.615	3.12117
										24.75	118.163	2.11592	123.701	2.82477
										25	115.945	1.89674	120.532	2.79153
										25.25	114.152	1.68819	117.962	2.49829
										25.5	111.75	1.51198	115.632	2.00878
										25.75	109.628	1.48484	114.175	1.77925
										26	109.163	1.3497	112.742	1.76175
										26.25	108.195	1.34757	110.52	1.8527
										26.5	107.311	1.55344	109.048	2.1895
										26.75	105.882	1.33017	108.177	2.10596
										27	103.897	1.36737	107.43	2.14877
										27.25	102.643	1.21637	106.791	2.03239
										27.5	101.984	1.26105	105.827	1.96211
										27.75	101.092	1.17491	105.014	1.83201
										28	99.0807	1.29485	103.181	1.71532
										28.25	97.1939	1.34775	101.371	1.57258
										28.5	96.9964	1.41457	100.018	1.42548
										28.75	96.4107	1.56314	98.9284	1.45661
										29	95.4143	1.7064	97.9446	1.75946
										29.25	96.0892	1.5131	97.6901	1.85962
										29.5	95.6022	1.27591	97.5967	1.78302
										29.75	94.8514	1.34708	97.1652	1.66042
										30	93.8539	1.41956	96.5467	1.70542
										30.25	92.6101	1.37112	96.106	1.79983
										30.5	92.1912	1.30166	95.1549	1.54684
										30.75	91.1972	1.39554	94.6534	1.44413
										31	91.7304	1.36404	93.6496	1.55898
										31.25	90.9684	1.23044	92.3455	1.38067
										31.5	90.6864	1.3015	91.0898	1.27319
										31.75	90.0301	1.16191	91.5086	1.30026
										32	89.5206	1.11604	91.8287	1.34465
										32.25	88.5172	1.15133	91.0606	1.3997
										32.5	88.1907	1.26862	90.0813	1.34413
										32.75	87.5955	1.4106	89.0274	1.25267
										33	87.5932	1.58687	88.3138	1.19758
										33.25	88.3956	1.50328	88.1717	1.14075
										33.5	88.3706	1.23433	88.4886	1.28287
										33.75	87.9073	1.2562	87.9095	1.41642
										34	87.8117	1.2297	87.5823	1.44401
										34.25	88.1842	1.18197	87.5128	1.30115
										34.5	88.1908	1.27911	86.8307	1.24721
										34.75	88.8375	1.02001	87.5088	1.4885
										35	88.7637	1.14205	88.6021	1.41083
										35.25	88.8259	1.20374	89.1103	1.53014
										35.5	90.1042	1.1812	90.0306	1.68523
										35.75	91.4883	0.935584	90.3897	1.73026
										36	92.2861	0.949688	91.9858	1.63115
										36.25	95.5752	1.22427	95.5297	1.79222
										36.5	99.4316	1.50296	99.4907	1.93166
										36.75	103.447	1.79602	102.918	2.0229
										37	107.106	2.14465	105.479	2.08156
										37.25	110.6	2.41177	108.35	2.13245
										37.5	112.49	2.17611	111.02	2.33302
										37.75	114.321	2.39766	113.745	2.3727
										38	115.74	2.62316	116.736	2.51707
										38.25	117.416	2.69384	118.078	2.59767
										38.5	118.967	2.98057	118.823	2.583
										38.75	120.748	3.06461	120.111	2.70713
										39	122.464	3.18687	121.417	2.98565
										39.25	123.93	3.38268	123.033	3.11092
										39.5	124.962	3.55868	124.723	3.2842
										39.75	127.252	3.7814	127.584	3.4077
										40	127.475	3.67051	130.564	3.507
										40.25	129.008	3.53661	132.531	3.47198
										40.5	130.189	3.4828	133.571	3.43223
										40.75	129.792	3.49241	132.899	3.4985
										41	130.697	3.47583	133.152	3.50214
										41.25	131.005	3.45689	132.965	3.39104
										41.5	133.097	3.54481	133.099	3.38915
										41.75	134.049	3.60845	134.027	3.55127
										42	134.199	3.80807	134.666	3.64764
										42.25	133.338	3.65126	135.162	3.62457
										42.5	132.036	3.21334	135.025	3.30734
										42.75	132.472	2.94487	133.761	2.94227
										43	131.707	2.78533	133.621	2.82112
										43.25	130.594	2.77974	133.752	2.96137
										43.5	129.978	2.45862	133.3	3.15568
										43.75	128.493	2.21829	131.81	2.91176
										44	126.469	2.14562	130.562	2.75824
										44.25	124.896	2.17506	130.389	2.6589
										44.5	123.924	2.30862	129.482	2.56091
										44.75	124.389	2.31347	128.558	2.55352
										45	122.721	1.97501	127.434	2.42685
										45.25	121.719	1.67293	123.989	2.12114
										45.5	120.429	1.82229	122.175	1.97307
										45.75	121.255	1.95612	120.949	1.76106
										46	120.901	2.11166	121.458	2.01097
										46.25	121.881	2.12949	121.632	2.30368
										46.5	122.482	2.44416	121.713	2.48385
										46.75	121.499	2.25636	122.367	2.52294
										47	123.294	2.18298	122.7	2.52806
										47.25	125.964	2.19671	124.201	2.67437
										47.5	128.176	2.19594	126.663	2.89931
										47.75	129.152	2.36284	129.014	2.75887
										48	129.411	2.62672	130.825	2.77708
										48.25	132.872	2.69381	134.01	2.89047
										48.5	136.274	2.79613	137.069	3.02517
										48.75	139.591	2.92608	140.158	3.12844
										49	142.828	3.06597	143.202	3.25378
										49.25	145.863	3.23305	146.185	3.39371
										49.5	148.847	3.4114	149.055	3.52066
										49.75	151.512	3.58722	151.699	3.65659
										50	154.369	3.76671	154.363	3.7831
										50.25	157.255	3.92943	157.097	3.90066
										50.5	160.042	4.08978	159.782	4.03367
										50.75	162.775	4.24376	162.438	4.1624
										51	165.328	4.38579	165.015	4.29162
										51.25	167.915	4.52777	167.548	4.41646
										51.5	170.31	4.68096	169.927	4.54939
										51.75	172.288	4.69063	172.236	4.68091
										52	174.039	4.72833	174.273	4.84705
										52.25	175.81	4.7883	176.328	4.97717
										52.5	177.234	4.7546	177.913	5.20123
										52.75	178.835	4.76832	179.556	5.33917
										53	180.065	4.80971	181.314	5.45163
										53.25	182.299	4.92315	183.389	5.51857
										53.5	184.297	5.02688	185.413	5.60738
										53.75	186.083	5.13389	187.189	5.66809
										54	187.112	5.13776	188.648	5.76497
										54.25	184.738	5.0369	187.298	5.78525
										54.5	178.498	4.54305	181.724	5.66555
										54.75	170.95	4.00224	173.977	4.73836
										55	162.698	3.02459	166.788	4.29698
										55.25	156.375	2.50306	159.736	3.86669
										55.5	151.849	2.44963	153.62	3.52476
										55.75	146.806	2.1284	147.376	3.05126
										56	143.895	2.03611	142.561	2.65661
										56.25	141.112	2.19111	140.74	2.72777
										56.5	136.527	1.88277	138.475	3.03584
										56.75	133.038	1.78774	135.808	2.87984
										57	129.595	1.78586	131.647	2.69107
										57.25	126.444	1.89403	129.331	2.74345
										57.5	126.012	2.07961	126.006	2.59702
										57.75	123.717	2.30297	123.577	2.35885
										58	121.807	2.08363	120.21	2.03755
										58.25	119.443	1.87144	118.564	2.14351
										58.5	116.811	1.69128	116.87	2.01399
										58.75	115.086	1.5821	115.513	1.63659
										59	113.873	1.75573	114.572	1.49603
										59.25	113.106	1.68523	113.28	1.58578
										59.5	112.4	1.70003	111.884	1.63389
										59.75	111.838	1.832	111.752	1.82871
										60	111.607	1.70744	111.174	1.82236
										60.25	114.932	1.71022	113.639	1.80679
										60.5	117.684	1.79823	116.726	1.81817
										60.75	120.123	1.74414	119.498	1.84833
										61	121.1	1.88591	121.688	1.9713
										61.25	121.764	2.07691	123.165	1.89479
										61.5	122.541	1.95207	123.928	1.96825
										61.75	123.309	2.05004	124.376	1.94148
										62	123.4	2.21523	126.061	1.87315
										62.25	123.698	2.09857	127.041	1.88434
										62.5	123.299	2.23155	129.079	2.05121
										62.75	123.404	2.31667	130.096	2.20563
										63	123.999	2.09343	130.471	2.30848
										63.25	125.721	1.92289	131.812	2.43788
										63.5	125.273	1.73153	131.857	2.22947
										63.75	125.047	1.83764	133.257	2.22585
										64	124.683	2.1242	134.547	2.4438
										64.25	125.576	2.46992	135.272	2.65617
										64.5	125.661	2.57904	135.494	2.68015
										64.75	125.894	2.80039	135.417	2.65982
										65	126.635	2.63233	135.145	2.95415
										65.25	126.39	2.41894	135.445	3.10497
										65.5	127.052	2.36056	136.788	3.2812
										65.75	128.13	2.29661	136.63	2.69567
										66	129.667	2.52319	137.277	2.4062
										66.25	129.921	2.48348	138.048	2.43748
										66.5	130.16	2.57703	138.005	2.52697
										66.75	129.607	2.56101	137.803	2.68476
										67	128.63	2.74682	137.722	2.85306
										67.25	128.395	2.8507	136.27	3.00888
										67.5	126.484	3.10749	134.92	2.93411
										67.75	124.151	3.04861	133.186	2.66812
										68	121.839	3.09307	130.572	2.36919
										68.25	120.774	2.81863	128.974	2.49692
										68.5	120.366	2.54116	126.907	2.29981
										68.75	119.12	2.52044	124.021	2.00504
										69	118.102	2.60757	121.698	2.01479
										69.25	117.739	2.66268	120.652	2.25926
										69.5	116.876	2.76955	120.023	2.36468
										69.75	117.282	2.77148	120.281	2.44985
										70	117.644	2.79142	119.479	2.33116
										70.25	117.959	2.83128	117.768	2.37429
										70.5	118.347	2.82576	116.74	2.52056
										70.75	118.862	2.71362	116.901	2.48594
										71	119.79	2.65477	118.827	2.2631
										71.25	121.667	2.56242	120.19	2.38316
										71.5	124.156	2.6675	122.222	2.3875
										71.75	125.286	2.68989	124.968	2.29771
										72	125.676	2.74649	127.524	2.05634
										72.25	124.069	2.85064	129.44	1.86648
										72.5	121.349	3.03218	127.708	1.79884
										72.75	118.251	3.04778	124.654	1.74028
										73	115.223	2.72572	121.162	1.82082
										73.25	114.304	2.54434	118.252	2.07835
										73.5	112.397	2.25046	115.612	2.44205
										73.75	110.73	1.86161	113.913	2.76899
										74	109.702	1.80312	112.248	2.93766
										74.25	107.992	1.71865	110.418	2.78062
										74.5	105.327	1.59704	108.395	2.48468
										74.75	103.722	1.45697	106.254	2.14287
										75	102.208	1.7655	105.462	2.28869
										75.25	101.332	1.84488	105.05	2.48816
										75.5	101.189	1.83918	103.05	2.27566
										75.75	100.497	2.00762	101.738	2.04369
										76	99.0985	1.85174	101.445	1.71872
										76.25	98.8376	1.82418	102.116	1.57634
										76.5	99.3445	1.72454	102.149	1.56225
										76.75	99.5463	1.85202	101.397	1.63155
										77	98.7412	1.77382	99.6684	1.65227
										77.25	98.2204	1.54018	98.2587	1.58306
										77.5	97.0303	1.5116	98.1544	1.74639
										77.75	95.8575	1.46369	98.194	1.92722
										78	94.8309	1.55841	98.3681	1.87935
										78.25	93.998	1.66831	99.0772	1.62801
										78.5	92.9458	1.61448	97.9598	1.62386
										78.75	93.0354	1.3867	96.0193	1.70591
										79	94.2694	1.24897	94.5351	1.66913
										79.25	94.013	1.28148	93.3692	1.65798
										79.5	93.4822	1.47042	92.0996	1.6081
										79.75	92.7779	1.42403	92.2513	1.69429
										80	92.2934	1.3887	91.9513	1.71008
										80.25	91.7953	1.38904	91.0753	1.67126
										80.5	91.0257	1.48055	90.4472	1.44993
										80.75	90.4428	1.46094	91.4809	1.55977
										81	89.8917	1.42322	91.7615	1.40341
										81.25	89.5421	1.34755	91.0005	1.42252
										81.5	89.4362	1.54613	89.7735	1.369
										81.75	90.6257	1.60512	89.4113	1.33986
										82	90.682	1.51424	89.4634	1.41639
										82.25	91.0619	1.38159	90.2037	1.45144
										82.5	90.7442	1.41223	90.1554	1.41151
										82.75	91.1544	1.50214	89.8296	1.40502
										83	91.4925	1.5754	90.339	1.52243
										83.25	91.7953	1.49473	91.7436	1.60511
										83.5	92.2749	1.35688	91.5585	1.51732
										83.75	93.1014	1.33329	92.2619	1.46266
										84	94.299	1.52543	93.5438	1.53789
										84.25	98.0023	1.71645	97.1142	1.66783
										84.5	102.062	1.93917	101.078	1.83392
										84.75	105.982	2.18178	104.698	1.99752
										85	109.438	2.43883	107.634	2.16224
										85.25	112.797	2.73891	110.996	2.35667
										85.5	115.855	2.92331	114.458	2.53042
										85.75	118.653	3.1817	117.195	2.75285
										86	120.121	3.08055	119.571	2.90895
										86.25	122.227	3.26524	121.76	2.89145
										86.5	123.729	3.45135	123.929	3.15338
										86.75	123.472	3.06823	125.874	3.36582
										87	123.249	3.02729	128.334	3.56023
										87.25	123.888	3.13651	129.874	3.61775
										87.5	123.257	2.90535	131.253	3.74373
										87.75	123.505	2.53763	133.301	3.89727
										88	124.519	2.57241	134.55	3.9954
										88.25	125.537	2.71357	134.043	3.6412
										88.5	125.601	2.78268	134.525	3.5504
										88.75	126.143	2.93937	136.343	3.6222
										89	128.699	3.17863	137.63	3.6199
										89.25	129.542	3.12177	137.827	3.50983
										89.5	130.936	3.48952	138.895	3.51429
										89.75	132.552	3.78876	139.803	3.58213
										90	132.593	3.86413	140.298	3.75003
										90.25	132.094	3.71681	141.316	3.55794
										90.5	131.501	3.38247	141.944	3.58822
										90.75	129.855	2.85377	141.714	3.45019
										91	128.003	2.68267	140.248	3.36364
										91.25	126.777	2.70445	140.105	3.40805
										91.5	125.962	2.64061	139.761	3.76073
										91.75	124.614	2.52956	139.697	4.00397
										92	123.615	2.4792	136.702	3.81588
										92.25	125.118	2.65943	134.059	3.51393
										92.5	123.818	2.7179	132.769	3.32981
										92.75	122.772	2.54849	130.446	2.99906
										93	122.762	2.43428	128.835	2.75164
										93.25	122.209	2.40804	128.066	2.91142
										93.5	122.725	2.64995	128.439	2.80071
										93.75	122.853	2.85454	127.5	2.67957
										94	122.125	3.02409	127.299	2.59614
										94.25	122.224	3.06651	125.693	2.5913
										94.5	122.813	3.18933	124.119	2.56379
										94.75	123.246	3.19062	124.045	2.78195
										95	123.371	3.44471	124.749	2.7672
										95.25	124.702	3.58655	126.559	2.74014
										95.5	125.741	3.61502	128.207	2.80293
										95.75	125.706	3.81057	130.075	2.94325
										96	126.351	4.06189	132.848	3.18153

## Sheet: Fig4A_NREMsleep
Each column represent 1 mouse; values represent the amount of NREM sleep in a given hr (see columnA) in minutes
	WT																				KO
Time[hrs]	_1WT_NO_CIRP03	_1WT_NO_CIRP04	_1WT_NO_CIRP05	_1WT_NO_CIRP09	_1WT_NO_CIRP11	_1WT_NO_CIRP18	_1WT_NO_CIRP19	_1WT_NO_CIRP29	_1WT_NO_CIRP30	_1WT_NO_CIRP31	_1WT_NO_CIRP48	_1WT_YS_TC03	_1WT_YS_TC06	_1WT_YS_TC08	_1WT_YS_TC09	_1WT_YS_TC12	_1WT_YS_TC13	_1WT_YS_TC18	_1WT_YS_TC21	_1WT_YS_TC22	_2KO_NO_CIRP01	_2KO_NO_CIRP10	_2KO_NO_CIRP13	_2KO_NO_CIRP14	_2KO_NO_CIRP15	_2KO_NO_CIRP20	_2KO_NO_CIRP25	_2KO_NO_CIRP40	_2KO_NO_CIRP50	_2KO_YS_TC01	_2KO_YS_TC07	_2KO_YS_TC10	_2KO_YS_TC15	_2KO_YS_TC17	_2KO_YS_TC19	_2KO_YS_TC20
0.5	35	34.4	33.67	30.8	41.07	41.6	29.93	39.87	46.33	40.67	37.47	25.6	27.8	34.27	39.87	22	38.8	43	37.6	30.87	40.33	22.33	29.33	37	21.47	24.73	48.33	23.47	27.87	39.2	35.93	27.27	15.4	32.13	19.67	42.53
1.5	35.4	27.6	40.6	22.73	42.6	42.8	33.27	35.33	33.6	31.33	35.93	20.13	21.47	36.07	33.4	22.47	35.13	27.93	36.47	39.87	35.4	40.8	37.73	27.73	41.13	33.47	32.8	30.6	44.33	39.07	32.8	47.67	43.47	37.4	45.8	39.07
2.5	36.2	36.2	26.47	37.73	34.87	43.33	35.33	48.4	24.4	34.87	36.6	45.53	43.2	40.8	31.53	30.27	31.2	36.33	34.6	30.33	29.87	36.73	28.93	41.67	40.4	34.4	18.47	34.73	28.8	33.47	30.53	8.8	14.93	27.67	21.27	27.2
3.5	31.07	27.8	36.6	39.8	38.47	29.2	33.87	11.6	21.8	40.33	40.4	27.6	22.47	40.67	14.87	43.13	40.73	43.4	43.13	41.2	33.8	38.53	32.27	12.73	22.2	41.47	34.53	28.73	26	39.93	40.27	32.8	46.07	41.67	40.73	31.73
4.5	42.4	35.87	36.33	30.4	19.93	29.27	39.47	43	37.87	6.4	24.13	36.2	33.93	11.8	37.33	18.4	41.07	33.07	40.13	34.13	36.73	9.33	30	31.73	39.67	1.53	36.4	30.27	33.2	43.93	42.87	22.93	32.73	4.6	43.47	24.53
5.5	21.47	28.27	39	32.33	37.53	41.2	35.4	38.53	37.47	35.2	22.8	38.6	36.33	44.87	37.33	32.87	3.07	39.87	26.27	26.27	33	44.27	17.67	37.33	31.87	44.67	29.33	40.2	42.33	30.07	18.73	45.4	35.93	40.47	15.6	26.2
6.5	36.13	37.47	20.07	24.8	36.27	31.47	33.67	25.6	35.27	29.53	39.27	36.33	26.27	23	43.53	39.13	44.6	28.73	42.4	38.4	42.53	33.4	43.6	38.47	21.27	25.67	29.8	43.47	31.73	18	39.07	11.53	42.67	22.53	45.07	38.33
7.5	47.53	26.2	42.47	33.93	28.67	36.13	32.67	44.33	28.53	36.47	37.2	44.27	33.27	31.4	29	14.67	34.93	40.93	35.6	41.27	30.53	21.47	21.13	19.13	42.07	43.47	39.87	18	21.73	39.2	29.13	48.27	36.2	39.2	38.87	36.13
8.5	20.87	28.4	28.2	35.53	41.73	27.47	41.8	23.8	41.67	30.33	31	24.87	41.13	29.27	32.53	41.67	28.33	27.2	27.33	29.27	33.07	37.87	42.4	37.47	35	10.93	40.87	38.8	45.53	17.6	43.2	35.73	31.93	42.13	26.67	35.2
9.5	39	39.6	38.47	28.87	29.87	25.13	24.33	36.33	15.6	22.53	21.93	29.13	28.6	39.4	29.07	30.53	39.53	44.93	29.6	33.53	34.6	35.67	34.53	33.8	33	40.47	31.47	32.53	17	40.8	29.67	3.67	31.27	8.4	33.33	29.13
10.5	21	25	26.53	30.67	27.27	33.4	21.8	35.2	27.6	29.93	34.73	33.4	25.53	18.53	31.93	27.4	26.47	22.07	38.67	29.33	34.93	22.2	31.47	29.8	32	26.93	19.8	31.4	27.13	26.93	24.2	45.13	35.87	28.53	22.27	32.27
11.5	29.33	25.07	29.33	18.8	13	24.8	26.53	25.67	25.6	20.2	19.67	24.6	27.33	26.2	25.93	28.13	25.53	29.2	20.47	30	28.53	22.93	9.27	21.6	20.27	23.6	29.33	14.8	11.67	16.93	17.67	22.2	31.87	23.13	5.73	32.13
12.5	0.6	11.4	13.73	4.53	2.2	0.33	4.13	5.73	0.53	0	0	10.07	1.13	3.8	1.93	3.87	8.8	4.2	0.13	0.07	12.67	0	0	0	0.53	2.47	0	1.2	11.4	0.6	0	8.2	0.13	0	0.2	0
13.5	8.33	20.07	16.33	0	4.73	12.27	5.13	2	23.6	6.2	10.47	23.87	23	12.93	0.4	0	14.13	5.33	4.53	0	32.53	0.87	6.13	0	0.4	23.73	0	2.47	23.8	0	9.13	10.2	0.27	0	0.47	10.8
14.5	0.67	5.67	24.13	0.27	4.4	19.33	3.2	13.67	26.93	6.2	18.47	19.8	18.87	24.33	0.27	3.4	21	20.07	19.93	8.87	32.13	0.93	24.93	0	14.33	31.73	0.47	3.27	28.6	26.13	0	0.73	1.07	17.07	7.27	10.6
15.5	0.33	28.8	25.93	12.2	5.87	16.67	1.67	9.93	0.53	16.27	26.93	12.13	32.4	32.8	6.53	9.53	18.07	4.8	1.07	19.87	23.87	12.33	2.6	0.4	1.33	13.87	0.8	26.93	23.67	0	0	1	0.87	0	35	5.67
16.5	34.73	29.73	15.8	17	1	24.13	4.67	21.33	17.8	8.27	26.47	22.33	6.27	9.33	1.6	4.67	9.6	10.4	0.13	8.6	16.93	10.47	20	0.13	13.47	27.93	3.73	28	3.4	16.67	0	14	0.93	15.87	4.47	19.27
17.5	0	27.93	15.87	5.2	0	0	20	0.67	17.07	9.8	1.8	22.93	19.73	28.27	30.2	41.33	23	31.53	37.4	32.93	30.53	0.87	0.27	0.47	3.73	8.67	10.13	0	12.33	6.87	16.07	0	6.4	1.73	8.73	12.8
18.5	9.27	13.2	3.4	12.87	26.6	31.4	0	31.07	20.53	13	39.93	16.87	7.2	22	16.2	3.87	29.67	26.67	14.93	31.33	31.87	37.13	28.07	6.4	25.07	31.2	10.53	19.87	33.4	11.47	20.73	0	40.87	34.93	33.8	12.13
19.5	21.4	28.33	32.53	7.53	0	17.53	17.87	12	19.53	29.6	28.67	14.53	34.6	29.8	12.73	23.07	22.27	17.53	30.8	16.2	20.67	10.33	20.33	38.87	27.27	6.4	21.33	38.87	27.93	7.87	16.67	7.07	11	11.87	12.87	26.8
20.5	19.93	19.53	27.6	22.87	38.33	28.13	28.73	25.13	25.2	0	15.07	40.93	31.47	15.6	41	40.27	31.13	25.47	20.47	31.4	35.13	26.93	27.07	19.2	33.4	40.93	2.2	42.33	28	40.33	30.27	33.4	30	27.47	40.4	30.87
21.5	10.33	32.13	12.27	7.53	11.8	2.93	27.13	11.13	25.93	20.27	30.87	32.73	25.27	21.4	26.4	30	21.6	32.6	14	18	27.27	24.8	29.93	1.8	20.87	5.13	15.8	27.07	21.8	20.73	31.87	35.6	0	17.53	30.4	32.87
22.5	23.8	17.93	27.27	16.73	16.27	23.73	2.53	33.4	24.93	22.33	18.2	18.2	19.47	31.07	0.87	18.13	35.73	15.27	0	13.93	24	20.93	24.33	35.2	14.67	23.73	17.53	4.8	27.87	16.6	3.07	4.33	32	23.8	10.4	7.07
23.5	14.67	17.4	21.73	22.73	9.27	16	27.47	4	16.93	27.8	12.87	0	14.67	20.13	14.2	11.2	31.93	21.87	12.13	0	32.13	1.4	13.73	6	16.73	17.4	8.93	5.87	8.33	12.47	0	0	13.4	12.2	0.27	13.33
24.5	39.13	27.07	39.8	27.33	36.73	39.6	34.27	40.47	33.07	35.93	47	20.13	31.13	38.8	23.33	28.8	39.6	41.4	42.4	35.73	33.93	36.6	33.4	40	41	35.2	36.33	0	30.33	36.87	18.87	38.2	24.53	40	37.73	28.13
25.5	31.27	32.2	27.07	34	30.4	39.53	38.8	42.87	36	27.87	15.53	20	39.47	33.27	43.07	26.6	34.33	41.73	37.07	40.6	28.67	35.6	30.6	31.13	32.8	36.2	31.07	40.8	19.93	35.27	30.8	44.67	35.27	24.47	39.8	31
26.5	32.8	34.53	40.33	32.4	30.33	34	32.07	34.8	28.67	38.13	28.4	33.87	33.53	36.33	30.93	19.87	30.67	35.27	34.07	38.2	32	32.73	39.93	41.73	41.27	32.6	35.2	13.53	42.67	36.4	22.6	27.53	34.8	19.27	42.4	17
27.5	29.73	27.93	31.87	31.2	33.53	26.73	36.4	43.2	17.93	30.07	36.53	38.8	32.07	29.8	35.6	40.4	37.6	39.07	40.73	39.6	31.8	31.13	31.6	25.07	16.8	40.33	37.93	39.07	30.27	21.53	22.47	45.67	36.33	29.67	10.13	47
28.5	41.73	23.4	40.67	33.07	36.4	42.6	38.93	21.8	35.33	29.33	37	42.07	32.33	44.07	40.07	16.2	22.93	44.27	41.73	31.07	34.8	37.8	13.8	15.87	42.4	41.07	35.13	41.87	43.47	43.07	44.93	12.73	42.73	40.4	26.53	26.53
29.5	39.6	43.93	16.53	18.93	34.4	41	28.53	44.6	40.87	18.93	35.13	20.13	28.73	32.73	26.33	36	43.4	32.67	25.8	38.53	31.53	25.13	42.53	43.47	35.53	18.73	42.33	18.8	6.4	36.73	43.8	32.87	9.53	28.4	45.67	30.53
30.5	28.4	25.4	41.87	36.4	34.67	15.13	38.73	33	29.93	31.2	42.6	42.93	39.93	22	38.4	31.13	30.47	34.93	37.87	38.93	27.53	36.13	29.93	30.93	30.47	32.53	16.8	38.2	33.8	33.87	12.8	43.4	41.47	32.8	37.87	45.33
31.5	40.6	36.47	43.13	38.53	36.13	42.33	32.53	37.33	24	38.07	24.27	43.33	30.2	36.73	29.93	32.93	35.47	36.67	28.87	30.27	32.2	30.27	41.87	39.2	31.6	35.8	44.67	44.93	38.73	24.07	42.6	5.67	29.07	37.33	27.8	25
32.5	37.13	31.2	35.93	28.33	41.27	29	39.6	36.87	33.33	32.4	43.33	44	25.2	34	28.67	37.93	38.53	31.8	47	34.2	34.33	25.6	39.67	37.33	39.8	37	27.8	35.47	29.2	38.27	29.47	48	42.8	30.87	40.67	42.6
33.5	29.4	31.2	30.13	33.87	28.13	34	27	38.4	39.53	35.8	23.67	35.93	36.47	25.87	31.47	28.2	26.6	36.6	27.53	35.73	32.87	40.2	23.07	26	34.4	29.13	31.53	26.07	31	29.53	40.47	33.8	40.13	28.73	24.93	29.73
34.5	25.33	28.73	36.13	25.6	26.8	29.67	32.93	35.33	22.73	23.8	31.47	29.73	31	31.93	24.6	33.47	26.4	25.93	28	32.4	38.67	25.4	25.07	27.93	33.73	32.67	36.2	30.27	27.73	28.07	27.2	31.73	22.2	16.8	29.4	33.67
35.5	37	33.2	27.67	20.07	16.67	23.27	30.47	25.73	26.87	16.2	18.2	17.53	27	23.07	26.33	24.8	30.8	31.6	19.2	22.6	24.8	34.6	21.33	30.93	21.07	27.6	25.4	24.87	14	15.47	24.33	26	30.73	21.33	14	25.73
36.5	1.13	13.8	7.73	0.33	5.67	1.27	2.73	0.87	0	0	1.33	10.27	0	0	0.27	1.6	13.93	2.73	4.33	4	19.93	0.67	10.6	0.4	0	0.2	0	0	1.47	7.07	0	1.2	7.27	0	0.2	9.33
37.5	0	19.73	25.27	0	11.2	11.6	4.8	16.8	18.2	8.53	15.8	9.73	21.27	11.13	0	0.27	17.47	1.13	0	0	24.73	0.8	9.93	3.8	1.6	15.93	1.27	1	15.4	0	0	2.73	0.47	0	0.13	4.73
38.5	0	25.47	24.27	7.27	1.47	21.73	0	4	10.87	5.73	17.73	24.2	10.13	16.2	0	13.47	20	21.13	0.13	0.33	24.93	14.8	34.73	5.73	5.27	20.73	7.6	6.53	33.73	13.47	0.47	13	7.73	15.73	1.27	19.87
39.5	2.53	21.87	21.07	19.33	4.67	8.6	0.13	19	32.73	19.6	14.4	5.73	12.47	34.8	1.27	1.47	8.6	14.53	2.27	4.47	28.07	0	0	3.67	0	11.53	0.4	2.47	1.07	0	19	15.67	1.87	0.4	1.2	7.33
40.5	0	10.87	18.13	6.53	6.47	18.87	0	17.67	9.6	5.27	21.2	22.07	12.27	11	21.13	16.4	18	24.67	0.87	32.33	17.8	8.8	0	6.93	4.6	13	2.6	18.6	14	17	0	26.47	27.73	22.47	44.13	3.27
41.5	10.6	18.87	31.53	0	0	14.87	0	4	19.47	25.6	17	14	22	15	4.27	14.93	24.6	4	5.93	8.87	18.87	1.33	41.4	3.07	33.4	26.8	4.93	45.8	34.93	6.33	1.33	2.13	0	0	11.8	23.27
42.5	5.8	26.8	18.87	0	22.53	18.6	28.13	37.6	5.8	0	0.13	16.2	32.27	34	20.47	1.33	9.13	29.13	46.8	19.6	26.6	29	4	24.07	3.07	12.4	15.93	2.6	16.07	17.47	41.4	25.07	15.07	32.73	0.27	15.4
43.5	35.67	37.47	16.27	6.87	7.8	22.07	22.87	3.73	29.47	26.93	36.8	18.87	29.47	24.6	34.4	32.53	33.33	16.73	37.27	35.13	38.47	18.13	26.8	12	26.2	25.87	13.53	22.2	20.47	14.4	18.07	1.53	23.2	26.4	25.2	24.13
44.5	15.73	19.93	33.4	12.4	33.87	22	8.27	34.8	23.67	13.93	18.27	24.13	25.47	33.27	29.47	33.13	29.13	32.33	17.4	26.73	23.4	29.6	30.87	12	15.67	8.8	19.67	43.6	5	25.53	19.6	33.13	27.73	6.07	30.6	19.27
45.5	9.67	28	23.67	12.27	13.8	13.33	38.6	31.73	34.93	17.67	34.47	35.07	25.13	30.53	5.8	17.93	29.53	12.47	22.8	19.33	24.67	20.8	30.87	22.33	26.27	37.4	23.6	21.4	37.87	22.53	45.4	29.73	20.4	37.93	22.6	33.73
46.5	22.27	16.8	21.8	10.67	15.2	12	19.07	8.33	17	11.8	17.33	29.53	8.73	24.13	30.47	16.93	25.8	34.13	0.33	17.4	32.93	7.33	27.6	1.07	29.2	15.67	14	27.27	25.2	13.13	0.27	0.13	18.8	19.87	26.6	22.67
47.5	11.67	0	16.67	16.53	16.8	7.2	13.67	0	11.87	19.73	6.33	4.8	15.87	15.27	15.53	15.93	34.27	10.4	0.6	0.33	10.93	7.4	19.13	23.2	16.6	14.33	0	9.07	20.67	0	0	0	7.4	3	0.13	0
48.5	0	0	0.07	0	0	0	0	0	0.27	0.13	0.2	0	0.07	0.47	0.13	0	0	1.47	0.47	0.33	0	0	0.27	0	0.4	0	0.67	0	0.6	0	0	0.4	0	1.4	3	0.33
49.5	0	0	3.2	1.87	0	0	1.53	0.27	1.07	0.13	0	0	0	0	0.27	0	4.4	5.73	0.6	0	0	0.13	0.13	0	0	0	1	0	0.4	0.2	1.2	1.07	0	2.47	0.4	4.47
50.5	0	0	0	0	0.4	0.2	0.27	0	0	0.33	0	0.53	0.2	0	0	0	0.2	1.07	0	0.4	0	0	0	0.2	0	0	1.53	0	0	0	0	0.67	0	0	0	0
51.5	0.27	0	0.13	0.4	1.07	0.67	0.2	0.2	3	3.6	1.67	0.6	2.87	1.93	0.2	0.27	0.27	2.47	4.4	2.07	0	0	0.13	0.33	0	0.27	2.87	0.2	2.07	0	0.6	0	0	0	0.2	5.13
52.5	2.53	0	1.07	0.6	1.47	0.87	1.27	1.27	3.53	1.73	4.67	3.13	5.8	0.87	2.27	6.07	2.13	8.4	10.13	4.33	0	0.8	0.4	0.2	0.13	0.4	5.13	0.27	0.13	0.73	1.27	3.67	0.8	8.13	6.8	6.8
53.5	0.87	0.13	3.53	4.33	2.6	1.33	0.33	0.4	2.8	2.53	3.13	1.6	1.73	1.2	0.13	0.2	2.33	0.47	3	1.33	0.93	0.73	1.4	0.2	0.93	0.6	2.8	0	1.53	0	0.53	2.67	1.6	1.13	2	0.27
54.5	43.8	34.4	31.27	42.2	31.47	35.33	32.2	36.4	24.47	39.27	35.6	27.87	37.47	24.8	41.13	39.93	37.33	37.13	31.6	36.6	26.73	30.93	30.33	37.73	29	25.13	25.33	30.2	27.8	25.67	20.13	47.27	42.27	38.53	43.53	23
55.5	28.13	30.6	32.87	37.4	42.8	24.93	31.27	27.2	37.07	37.27	33.73	41.33	34.67	37.27	31.8	39.87	42.07	35.8	36.87	43	42	39.93	34.67	45.67	47.87	42.67	45.93	34.93	30.93	47.53	35.53	39.6	40	38.53	38.93	46.4
56.5	43	38.2	24.13	29.33	39.8	27.93	39.33	48.2	41.67	31.07	36	28.4	36.4	25.13	37.07	39.27	37	37.53	42	34.07	22.87	38.53	30.27	29.47	34.33	25.4	37.33	33.4	31	27.8	14.67	35.67	33.33	32.8	27.4	26.6
57.5	24.53	34.33	17.87	32.6	33.27	31.33	36.27	26.47	26.47	38.27	32.8	31.47	36.4	17.73	37.53	34.93	34.4	30.67	26.07	41.07	33.33	30.67	37.2	35.4	32.93	38.93	34	31.87	32.07	34.47	30.6	34.47	42.27	27.8	45.27	34.73
58.5	25.8	25.93	38.27	31.13	32.13	33.13	36	43.27	30.33	37.07	34.2	34.67	27.07	35.33	26	25.93	39.47	31.47	33.13	38.53	32.4	31.27	34.8	27.13	30.27	28.33	25.2	25.8	33.2	26.53	32.27	22.87	33.2	27.53	20.67	34.47
59.5	26.27	24.87	29.67	19.73	26.73	28.87	33.13	25.67	28.53	16.4	25.6	24.2	25.13	23.27	31.87	32.07	32.53	25.8	28.47	27.4	34.4	31.93	24.73	28	28.73	18.6	35.67	21.27	26.67	33.8	27.13	24.87	29.27	19.33	24.07	29.13
60.5	5.73	13.4	14.4	5	4.27	10.13	5.53	3.87	0.27	0	2.6	13	7.07	7.53	1.73	10.07	16.2	6.27	16	9.67	17.67	7.8	0.33	0.47	5.27	8.8	0	11.07	1.07	2.87	9.13	6.6	9.53	0	0.6	1.47
61.5	7.67	23.07	29.2	18.33	2.2	19.93	30.4	16.67	22.27	0	30.2	25.73	11.4	16.8	0	5.8	28.87	17.07	7.47	26.13	24.93	13.87	10.73	2.07	15.8	28.4	1	22	14.2	19.33	22.27	5.93	6	0.6	0.6	12.53
62.5	19.93	26.07	27.13	12.27	3.53	23.73	12.8	15.13	29.6	4.07	19.33	13.4	30.2	10.93	15.73	21.93	23.07	24.13	30.27	15.53	22.4	16	21.47	3.93	18.27	0.2	4.6	11.4	20.4	26.47	11.27	13.4	5.27	12.47	1	10.87
63.5	4	22.27	20.73	29.8	16.6	13.6	19.73	0.07	5.6	7.07	16.6	23.93	27.07	31.87	6.93	34.53	22.53	28.33	0.4	21.33	27.2	7.87	21.8	13.07	0	33.2	6.6	0	28.53	8.07	0.67	0.33	5.33	5.27	35.33	9.93
64.5	0.6	29.93	29.8	7.73	0.27	29.53	10.33	10.07	2.2	5.53	32.33	26	13.87	26.2	17.07	1.2	8.6	10.8	25.47	33.73	28.8	0	7.4	3.67	23.6	15.53	2.47	39.8	11.2	27.47	1	31.67	30.07	4.47	13.2	13.07
65.5	0	22.4	9.53	20.67	4.33	10.27	0.6	39.27	7.93	26.2	36.07	0.87	26.53	3.73	36.2	12.93	22.87	32.33	8.07	8.53	11.47	15.13	29.87	4.13	5.47	19.33	3.2	22.33	11.07	14.8	26.8	12.27	10.27	31.67	1.2	5.07
66.5	0	2	21.53	0.53	7.93	11.07	22.6	15.73	28	7	17.73	37.27	36.2	27.2	0	31.4	28.93	25.53	6.87	30.8	1.4	16.87	12.47	22.67	16.93	13.73	2.33	13.27	25.13	0	35.07	0.47	1.13	27.4	25.87	41.8
67.5	23.87	33.13	31.67	22.53	24.6	31.93	21.8	3.6	34.07	13.2	39.67	34.2	29.13	32.33	29.47	41.4	17.27	36.47	43.13	31.8	28.87	15.8	38.2	27.67	45.27	32.67	15.47	42.13	35.07	17.6	8.6	39.47	36.13	0.87	28.4	15.27
68.5	34.93	30.2	28.47	10.47	30.47	20.07	1.8	45.6	17.13	30.93	25.53	29.8	31.53	30.53	32.33	13.07	34.8	14.6	31.47	33.27	39.73	36.47	17.33	1.13	19	25.6	34.93	29.6	33.4	39	27.2	26.33	39.2	36	45.73	30.47
69.5	2.93	30.13	3.13	23.47	15.2	19.67	28.47	31.93	27.87	11.73	30.47	23.93	24.33	36.53	31.6	33.87	33.87	32.73	5.8	19.2	25.6	23.07	34.73	23.67	14.73	32.13	5.87	40.93	9.93	20.13	35.87	15.87	22.53	32.33	9.33	40.67
70.5	37.07	27.33	22.87	10.87	6.33	20.87	33.6	0	33.33	28.87	33	17.2	12.73	29	10.87	26.67	23.8	17.13	1.27	1.93	35.8	34.8	35.53	26.07	29.73	21.67	4.67	8	29.4	19.4	19	11.67	30.73	25.6	15.47	4.73
71.5	9.33	1.2	21.53	17.93	33.93	1.93	15.4	22.93	27.93	11.67	1.13	0	14.8	10.33	13.73	6.4	37.8	22	0	0.13	13	0	18.53	0	9.6	0	14.87	8.73	18	0	0	25.53	0	9.73	0.93	2.27
72.5	43.67	40	41.93	25.07	30.33	38.2	41.47	47.2	41.8	44.67	37.6	25.47	41.27	15.93	32.8	39.67	44.33	47.33	37.93	14.73	25.47	25.33	4.33	28.33	39.67	36	44.8	23.27	30.67	29.53	0	19.53	31.13	27.73	35.93	44.8
73.5	43.47	31.27	22.8	39.33	44.93	36.93	26.33	31.13	11.67	29	31.4	22.2	30.6	34.6	34.8	5.6	31.13	37.13	42.07	42.87	39.47	35.6	37.07	41.27	40.6	44.2	32	6.4	31.2	37.33	4.27	46.2	43.87	42.27	45.13	30.27
74.5	35.27	35.93	48.27	27.2	18.47	33.2	42.6	38.4	12.4	40.27	36.53	46.87	34	41.93	26.27	46.93	45.27	38.27	28.33	32.87	24.2	38.13	33.4	34.73	39.53	29.6	19.13	32.87	46.6	36.73	41.07	36.87	30	32.87	28.8	37.53
75.5	35	20.8	18.87	31.87	44.53	34.13	30	44.13	36.47	33.73	25.13	33.87	12.73	40.07	42.47	21.33	28.13	47.2	44.87	36.8	33.47	32	29.8	46.07	25.8	36.47	27.93	41.13	23.87	24.6	34.47	37.73	45.33	23.53	35.47	15.6
76.5	16.73	33.2	43.47	27.13	8.6	12.27	37.4	17.73	36	27.93	37.93	27.47	31.6	8.67	30.4	44.2	31.53	19.27	35.2	34.07	36.67	24.33	29.27	3.07	34.93	44.73	35.33	18.6	21.13	27.27	43.73	20.87	12.47	35.13	17.67	32.33
77.5	43.87	17.47	44.33	35.87	46.2	42.6	18	37.13	36.2	13.73	17.93	31.8	35.53	38.33	38.4	34.67	38.73	44.87	33.07	40	12.67	25.07	42.67	44.6	39.4	9.33	25.87	44.87	27.47	35.8	17.47	34.4	44.4	13.33	41.07	23.2
78.5	12.2	45.07	25.13	22.2	32.13	26.2	42.93	35.53	37.53	25.53	23	35.93	39.6	37.27	33.4	29.33	30.53	19.67	29.33	25.07	35.73	39.27	32.67	31.07	25.33	46.93	44.67	21.47	19.6	28.73	41.87	35.73	19.87	37.6	33.87	38.47
79.5	42.6	23.53	43.33	34.93	40.13	29.4	24.33	32.13	22.07	38.87	38	36.93	22.47	27.93	32.27	37.87	31.93	45.07	32.47	34.93	29.13	37	41.27	41.93	39.13	34.13	17.27	37.67	28.87	31.73	26.27	26.67	42.07	35.53	29	36.8
80.5	39.67	38.93	36.4	25.33	31.6	36.67	43.53	31.13	40.93	24.33	34.53	36.27	43	25.33	32.8	34.73	40.87	35.47	42.33	27.4	34.47	24.2	26.2	28.13	31.4	31.27	32.6	34.67	34.4	13.87	36.93	32	32.47	40.8	30.2	20.07
81.5	35.07	21.2	19	29.4	32.53	30.93	33	35.87	19.93	39.8	29.73	28.93	22.6	32.33	29.33	44.13	33.2	23.6	22.13	34.67	41.67	28.73	40.53	40	31.6	29.67	41.33	23.8	36.13	40.13	26.6	29.47	43.4	22.33	27.87	38.47
82.5	32.33	29.27	32.13	24.8	23.2	29.93	27.47	30.33	31.8	23.13	18.33	28.8	32.27	23	27.07	32.4	25	40.2	41.67	26.07	32	33.47	25.8	20.53	37.67	25.67	24.53	23.6	23.53	33.47	28	21.13	28.53	32.73	32	25.27
83.5	19.4	18.8	33.27	23.47	26.6	25.07	31.73	26.67	26.8	23.8	26.07	25.53	20.8	25.07	25.27	22.93	30.27	20	17.13	33.07	29.33	22.27	25.93	22.2	20	31.07	22.6	13.13	23.53	18.53	24.47	27	20.87	15.8	24.73	33.53
84.5	3.33	4.8	13.73	0.6	0.47	6.67	1.87	0	1.47	0	0	0.33	0	0.73	0	0	6.2	0.47	5.13	0	14.93	0	0.47	0.53	1.13	0.67	0	0	11	2.6	0.07	0.4	0.47	0	0	8
85.5	0.13	7.53	20.53	9.8	1.67	3.33	0.13	7.27	10.53	0.8	22.67	2.8	10.67	6.13	0	0	20.4	1.2	0.07	0	18.07	0	13.07	0.27	2.6	2.27	0	0	22.2	1.87	0.2	0.2	0	0.07	0.6	1.2
86.5	18.07	26.67	30	25	2.8	9.47	8.6	5.93	19.33	12.33	15.8	19.93	20.13	21.8	0	0.67	15.67	33.13	2.6	15.67	24.2	3	22.93	0	3	15.53	0.2	1.13	7.8	13.2	0.27	0	0.33	13.67	0.53	6.87
87.5	3.67	26.27	25.87	5.73	26.6	21.93	10.6	19.13	6.6	5.6	17.93	18	17.33	28.73	0.2	21.4	22.13	6.47	26.67	16.13	21.07	2.07	2.8	2.27	17.8	33.33	0	1	22.67	2.87	13.67	0.27	0	6.4	3.6	11.53
88.5	0	5.47	18.33	13.13	0	5.93	0.27	17.6	15.6	0.2	18.4	23.6	5.53	18.47	12.73	6.53	43.6	36.47	0	31.27	19.53	10.47	19.07	1.53	0.13	1.4	0.2	35.73	2.87	2.47	32.4	23.4	6.73	0.93	31.4	11.13
89.5	10	32.33	5.67	14.53	0	20.2	0.8	6.8	19.47	7.73	40.53	2.4	25.13	27.87	17.93	0	29.27	15.73	2.07	1.93	5	3.67	33.67	0.93	11	28.6	0.53	11.4	20.47	21	0.4	0	42.53	6.87	5.93	12.4
90.5	23.07	15.93	8.33	16.73	15.87	2.93	29	36	9.4	26.47	18.27	35.6	37.07	16	27.8	23.6	22.8	12.13	40.13	36.93	14.47	37.87	13.93	3.13	22.2	11.33	9.67	16.87	4.6	0.53	27.87	0.47	0	38.6	14.2	21.27
91.5	11.47	21.93	31.67	18.27	39.93	21.33	29.07	17.13	33.73	2.07	30.13	14.53	9.8	26.93	18.87	43.33	30.73	43.6	28.2	29.8	40	13.33	39.8	12.8	12.33	24.07	13.67	44.33	7.73	29.33	7.2	10.6	15.8	4.33	27.33	20.33
92.5	17.73	33.87	21.67	18.93	3.6	10.73	6.8	14.13	24.67	23.73	11	36.4	25.07	26.8	24.93	32	24.73	12.93	27.27	16.6	20.33	16.73	31.6	46	30.07	28.53	29.33	26.13	34.6	18	40.27	35.27	33.87	28.8	26.73	8.8
93.5	24.33	19.2	5.4	13.47	27.53	9.27	38.2	45.47	31.33	17.2	40.6	25.47	22.33	33.87	21.13	18.6	31.93	14	5.2	0	29.27	28.6	31	10.07	11	13.2	26.87	16.47	11.47	34.2	11.73	19.27	22.87	12.47	18.07	22.8
94.5	24.2	0	44	18.33	21.4	0.93	24.8	16.4	12.8	16.67	21.73	20.8	26.93	23	26.2	10.13	27.6	27.53	0	5.53	25	18.13	32.8	3.53	26.67	34.67	0	30.4	35.27	12.87	8.8	18.4	23.87	17.13	37.8	26.27
95.5	0	31.33	1.73	25.13	0.47	9.07	22.93	32	27	18.93	28.47	9.53	27.2	17	16.67	21	29.67	13.73	0	6.33	6.4	0.33	6.13	3.93	16.27	2.2	12.67	0	11.07	15.87	0	0	0.2	20.67	22.4	17.13

## Sheet: Fig4A_REMsleep
Each column represent 1 mouse; values represent the amount of REM sleep in a given hr (see column A) in minutes
	WT																				KO
Time[hrs]	_1WT_NO_CIRP03	_1WT_NO_CIRP04	_1WT_NO_CIRP05	_1WT_NO_CIRP09	_1WT_NO_CIRP11	_1WT_NO_CIRP18	_1WT_NO_CIRP19	_1WT_NO_CIRP29	_1WT_NO_CIRP30	_1WT_NO_CIRP31	_1WT_NO_CIRP48	_1WT_YS_TC03	_1WT_YS_TC06	_1WT_YS_TC08	_1WT_YS_TC09	_1WT_YS_TC12	_1WT_YS_TC13	_1WT_YS_TC18	_1WT_YS_TC21	_1WT_YS_TC22	_2KO_NO_CIRP01	_2KO_NO_CIRP10	_2KO_NO_CIRP13	_2KO_NO_CIRP14	_2KO_NO_CIRP15	_2KO_NO_CIRP20	_2KO_NO_CIRP25	_2KO_NO_CIRP40	_2KO_NO_CIRP50	_2KO_YS_TC01	_2KO_YS_TC07	_2KO_YS_TC10	_2KO_YS_TC15	_2KO_YS_TC17	_2KO_YS_TC19	_2KO_YS_TC20
0.5	5.8	8.6	6.27	7.33	2.8	11.07	3.73	7.2	7.67	9.53	4.13	0.8	3.47	3.2	7.8	3.67	11.93	8.93	6.53	2	6.27	1.13	5.27	7.73	1.8	4.53	7.27	0.73	3.47	5.93	3.87	1.33	1.8	6.47	3	6.13
1.5	5.53	4.47	8.8	5	7.2	7.6	9.47	8.6	5.87	6.47	5.6	4.33	3.6	7.87	6.6	3.93	4.87	3.93	10.2	11.6	6.6	9.2	7.4	7.6	8.4	5.53	8	6.53	9.4	6.93	6.87	6.33	7.2	12.87	4.33	8.27
2.5	7.6	7.73	7.6	9.8	6.73	9.8	5.67	5.07	5.6	9.13	5.2	9.4	8.2	6.8	4.4	4.47	7.93	5.93	3.33	6	4	10.73	3.47	10.2	11.13	7.47	1.07	5	3.67	4.33	4	1.6	0.73	4.4	2.4	10.67
3.5	2.6	6.93	5.07	9.73	10	6.27	6.27	2	2.33	5.6	8.07	4	2.93	8.87	4.47	7.53	8.07	7.53	7.93	10.2	9.6	7.2	7.07	0.33	4.13	6.33	9.47	8	1.87	5.87	6.4	3.87	7.67	10	8.13	5.8
4.5	5.53	8.13	9.27	10.6	2.27	5.13	5.93	4.2	6.47	2	2.87	7	7.73	0.4	5.33	4.33	8.27	7.33	6.33	2.47	3.87	0.6	5	4.53	11.2	1.53	7.07	3.6	6.4	7.87	9.13	2.6	5.6	0.87	6.6	1.27
5.5	2.87	3.8	6.6	7.13	10.73	11.87	5.93	6.4	8.87	5.67	4.8	7.13	5.6	5.4	6.8	6.87	0	6.87	2.6	5.07	6.33	6.6	2.8	8.07	4.87	6.53	11.13	3.4	7.2	5.07	2.87	7.8	4.87	8.67	2	7.73
6.5	7.27	9.33	5.8	4	7.47	8.13	6.33	3.8	6	9.27	3.07	3.07	5	6.2	7.67	8.47	7.07	3.47	8.2	7.4	5.93	6.93	10.47	13.07	4.53	7.27	5.27	9.07	6.2	2.13	8.13	2.33	8.33	5.33	7.67	4.93
7.5	7.4	6.33	9.6	8	5.33	8.47	4.6	7.87	4.93	6.07	7.07	7	6.8	4.93	5	2.2	4.67	5.47	3.4	8.6	5.73	5.13	3.93	0.27	8.53	4.27	7.87	3.6	1	6.4	3.33	5.87	6.53	10.13	5.07	6.2
8.5	3.33	5.13	3.07	7.07	6.47	4.67	8.4	4.87	6.93	5.27	7.13	4.47	7.33	6.13	9.87	8.93	6	6.2	4.8	4.87	6.4	9	7	9.73	6.6	1.07	7.67	5.87	8.67	6.27	6.73	9.93	4.53	7.93	4.13	7.13
9.5	6.47	7.13	10.4	4.33	6.53	4.6	1.27	4.07	2.8	3.73	2.93	0.6	4	5.4	5	6.87	7.4	6.53	5.33	3.27	8.53	9.4	7.2	6.53	7.67	9.53	6.67	6.2	1.67	9.4	2.87	0	5.8	0	2.27	3.27
10.5	6.27	7.27	3.53	9.2	5.6	7.4	3.2	4.07	5.2	8.67	5.33	6.27	3.67	5.67	4.53	5.8	8.53	1.4	6.27	6.8	6.27	4.47	7.2	4.53	5	2.73	1.93	3.87	4.6	4.13	6	5.87	7.87	8.93	3.07	6.8
11.5	3.27	4.67	2.6	3.8	1.47	2.6	3.67	4.4	3.67	3.2	2.4	3.4	2.6	7	4.67	2.53	3.07	3.67	2.07	3.73	7.2	4.13	2.47	4.47	2.6	0.93	6.4	2.33	1.93	1.47	0.4	3.2	2.6	4.2	0.8	2.47
12.5	0	0	0	0	0	0	0	0	0	0	0.6	0.93	0	0	0	1.13	0	0	0	0	0	0	0	0	0	0	0	0	0	0	0	0.6	0	0	0	0
13.5	1.53	2.73	1.67	0	0	0.73	0	0	2.47	0	0.6	1.27	2.13	0	0	0	0	0	0	0	3.53	0	0	0	0	0.27	0	0	2.93	0	1.4	0	0	0	0	1.07
14.5	0	0	3.67	0	0	1.8	0	0.67	1.67	0	1.53	2.87	1.2	3.27	0	0	0.8	0.87	2.07	0	3.8	0	0.6	0	1.33	3	0	0	4.6	2.07	0	0	0	1.13	0	1.4
15.5	0	3.8	1.73	0	0	0.47	0	0.47	0	2.73	3.07	0.93	3.13	4.73	0	0	1.73	0	0	1.27	3.53	0	1.13	0	0	0.4	0	1.8	0.13	0	0	0	0	0	6.27	0
16.5	4.13	6.2	2.87	0.27	0	2	0	0.73	0.53	0	5.4	1.2	0.2	2.13	0	0	0	0	0	0	0.13	0.4	2.73	0	1.4	2.93	0	5.2	1.73	1.33	0	1.4	0	2.07	0	1.87
17.5	0	6.33	0	0	0	0	2.07	0	1.4	1	0	1.4	0.73	3.6	1.33	5	1.6	6.67	4.6	6.33	2.8	0	0	0	0.4	0	1.47	0	0	0	1.2	0	0	0	0	1.07
18.5	0	3.07	1.6	0	3.27	4.13	0	2.93	0.8	2.73	4.4	1.13	0	1.47	2.6	0	1.33	2.4	2.53	8.07	2.67	4	2.87	0	3	2.4	0	0.47	2.53	0	2.87	0	5	4.6	5	0.4
19.5	1.47	4.4	2.2	1.87	0	1.13	0	1	0.53	4.2	6	0.27	7.27	5.13	0.73	1.4	2.27	0.73	3.07	2.33	2.87	0.87	2.07	6.13	3	0	2.33	9.87	3.67	0.67	1	0	2.67	0.53	1.93	5.8
20.5	1.47	2.53	1.2	1.2	5.87	0.33	3.67	1.33	1.53	0	1	8.93	3.07	1.93	8	10.4	2.27	4.33	2.67	7.27	4.13	5.47	5.73	3.27	4.93	4.33	0	8.4	2.6	6.73	5.87	3.2	5.07	4.53	6	3.93
21.5	2.33	2.33	0.73	0.53	2.47	0.6	4.8	3.27	2.73	3.27	5	6.73	4.33	2.8	6.4	5.53	1.4	3.07	2.8	2.67	2.27	4.07	3.13	0	5.07	0	2.4	4	1.93	2	4	0.33	0	2.67	7	6.93
22.5	2	0.87	1.2	0.73	1.33	2.4	0.4	2.6	1.13	1.93	2.47	0.87	1.13	3.8	0	2.6	6.13	0	0	0	0.33	6.13	3.27	3.4	2.8	1.8	1.4	0	1.33	1.6	0.27	2.53	1.73	4.87	0.8	2.4
23.5	0.87	3.4	1.73	0.87	0	1.47	2.6	0.27	0.8	5.8	0	0	1.93	1.2	0.73	0	9.2	0.73	0	0	5.87	0	0.73	0	0.53	3.4	1.07	0.47	0	0.93	0	0	1.67	0.53	0	0.4
24.5	6.13	3.73	9.6	5.6	7.47	7.13	5.93	5.6	4.13	8.73	5.13	1.13	2.73	7.93	3.13	2.67	10.27	9.53	6.2	3.47	7	5.07	7.93	8.8	5.87	7.87	8.2	0	4.4	5.27	1.2	4.33	3.73	12.93	5.53	2.27
25.5	4.53	7	5.07	9.93	7.33	11.6	6.93	5.07	5.8	11.93	2.07	3.6	8.93	5.4	6.6	7.47	7.13	8.33	6.53	9.13	5.67	8.6	8.13	5.33	7.13	4.6	6.6	3.2	5.8	6.87	4.33	8.4	5	6.4	5.27	7.67
26.5	5.4	10.27	7.73	7.07	2.8	10.2	6.6	9.47	7.67	7.87	1.6	4.33	5.8	6.27	6.27	0.67	7.13	4.73	4	5.4	3.73	4.13	8.6	12.07	9.53	5.4	6.8	2	7.27	5.13	2.2	2.93	6.13	3.73	7.2	5.93
27.5	1.13	3.27	4.07	8	4.93	7.2	9.07	5.27	3.13	6.47	6.8	5.67	6.93	4.27	4.93	6.6	6.4	4.93	6.8	7.87	9.33	7.73	4.13	4.4	1.6	7.33	7	4.93	3.13	2.13	2.67	9.13	6.6	6.2	0	8.2
28.5	9	7.27	6.33	9.27	11.2	9.4	7.2	1.53	6.33	5.53	9.2	6.27	2.8	6.73	9	1.93	3.67	8.53	7.6	4.33	4.4	5.93	1.73	4.67	9.47	7.93	6.4	8.47	9.27	6.6	4.4	1.27	7.8	8.73	4.27	5.2
29.5	6	8.67	3.47	2.8	6.87	6.33	3.33	9.8	8.87	0.87	5	5.53	6.87	5.27	3.67	4.4	6.33	2.6	4.07	4.53	5.6	3.6	8.4	8.73	9	2.07	11.4	0.33	0.4	7.07	9.13	2.27	1.47	7.93	6.73	2.53
30.5	6.53	3.87	12.33	10.07	7.67	4.47	9.87	3.53	6.6	9.67	6.2	9.4	7.27	4.93	8.53	6.53	4.87	8.13	11.2	9.2	5.27	8.93	7.4	4.73	7.73	4.07	0.8	5.47	3.73	4.87	4.47	9.27	4.07	6.4	7.2	8
31.5	7.13	9.93	5.4	9.93	9	7.4	4.13	5.87	3.87	8.93	3.6	4.73	3.93	7.27	6.53	5.4	7.13	4.93	3	3.4	6	8.07	6.67	10.2	6.4	5.6	8.33	9.2	4.87	4.4	6.8	0	6.53	8.87	5.8	5.53
32.5	4.93	6.27	8.33	3.2	6.8	7.4	7.07	6.13	4.53	3.73	6.07	5.33	5	5.4	3.93	6.13	7.53	8.33	7.67	6.13	7.33	4.07	8.2	7.13	6.93	7.6	7.6	5	6.2	5.13	5.07	7.8	6.53	5.73	4.67	6.27
33.5	5.73	7.07	5.4	11.2	3.33	10.4	4.73	3.67	6.4	8.13	5.13	6.67	4.73	4.93	6.33	6.47	4.67	3.8	4.07	3.33	6.73	7.47	6.07	6	7	6	4.93	4.33	4.53	5.33	4.67	4.4	5.8	4.4	1.73	6.87
34.5	3.13	5.47	6.33	6.2	6.27	7.13	4.93	4.8	4.27	3.8	2.27	3.4	4.67	3.53	3.47	5.13	5.93	4.8	7.67	7.73	10.47	4.33	3.6	6.4	7.67	5.13	6.27	3.53	5.27	7.53	2.07	3.53	4.6	3.4	4.47	5.2
35.5	4.87	5.13	5.4	2.47	4.53	4.33	1.87	2.53	3.73	3.27	2.27	2.13	1.8	2	3.27	5.07	3.6	3	1.67	3.47	3.6	3.6	1.2	6.8	1.8	2.47	3.87	1.67	1.4	1.4	2.33	4.33	5.4	4.6	1.8	5.67
36.5	0	0	0	0	0	0	0	0	0	0	0	0.47	0	0	0	0	0	0.4	0.4	1.8	3.27	0	0	0	0	0	0	0	0	0	0	0	0	0	0	0.2
37.5	0	3.2	2.53	0	0	2.33	0	0.2	0.33	0	1.07	0.47	0.53	0	0	0	0.6	0	0	0	2.2	0	0.47	0	0	1.07	0	0	1.53	0	0	0	0	0	0	0.4
38.5	0	3.93	1.47	0.33	0	0.2	0	0	0.93	0	1.47	2.73	0.13	0.33	0	1.13	0	0.2	0	0	1.8	0	3.13	0.33	1.27	0.33	0.73	0	2.53	1.47	0	0	0	2.47	0	1.2
39.5	0	2.4	0.8	0.8	0	1.93	0	1.67	1.67	2.47	1.27	0	0	4.87	0	0	0	1.33	0	0	3.27	0	0	0	0	0.73	0	0	0	0	1.6	1.53	0	0	0	0.33
40.5	0	1.73	2.73	1.67	0	2	0	0	0	0	2.4	1.8	1.93	3.93	2.33	0.27	0	2.6	0	5.47	2.27	2.2	0	1.27	0	0.6	0	2	0.2	1.8	0	2.07	3.33	2.13	6.13	0
41.5	0.33	2.73	1.2	0	0	0.33	0	0	3.07	1.47	2.67	0.13	1.4	1.4	0.73	2.93	1.2	1.2	0	0.8	0.6	0	3.93	0	2.53	1.73	0	6.73	3.53	0.53	0	0	0	1.2	3.27	2.87
42.5	1.2	2.73	1.53	0	1.73	2.47	2.4	5.93	0	0	0	2	3	3.93	0.47	0	0	4	8.87	0.2	5.33	0.53	0	0.73	0.87	3.93	1.53	0.47	0.8	1.33	5.27	1.87	0	6.93	0	1.73
43.5	3.33	7.93	0	0	0	1.33	3.53	0	1.87	4.67	5.33	0.73	2.13	2.73	7.13	3	3.4	0.27	6.73	6.67	5.2	0.8	3.6	3.87	2.8	1.6	1.53	1.53	3.67	2.2	1.13	0	2.87	4.6	4.2	2.93
44.5	1.07	1.6	2.87	0	4.53	1.53	0	3	1	1.67	3.2	4.8	1.73	5.6	4.47	8.33	0.2	5.33	1.67	5.8	2.4	6.4	4.73	1.33	2.47	2.47	1.8	6.53	0	5.4	1.27	4.53	1.73	0	5.2	5.47
45.5	2.27	5	2.87	2	0.93	0.53	3.93	2.8	0.73	2.73	3.47	10.2	1.47	3.87	0.33	3.13	0.93	0.13	3.87	3.07	5.8	2.33	5.73	3.07	4	0.93	2.93	5.67	3.6	3.53	6.47	2.2	3.53	6.2	1.53	6.47
46.5	2.2	1.47	0	0.53	2.8	0	2.2	2.2	1.8	0.93	0.6	3.47	0.27	3.6	5.47	0.93	0	2.73	0	0.6	5.33	1.2	1.67	0	4.6	0.67	0.33	4	0.53	1.87	0	0	2.13	3.47	3.8	4
47.5	1.07	0	0.8	0.27	0.93	0.87	0.73	0	1.8	1.93	0	0.73	0.33	1.73	1.4	0.73	4.13	0	0	0	1.2	0.13	1.93	3.6	0.8	2.27	0	0.47	2.67	0	0	0	0	2.4	0	0
48.5	0.13	0	0	0	0	0	0	0	0	0	0	0	0	0	0	0	0	0	0	0	0	0	0	0	0	0	0	0	0	0	0	0	0	0	0	0
49.5	0	0	0	0	0	0	0	0	0	0	0	0	0	0	0	0	0	0	0	0	0	0	0	0	0	0	0	0	0	0	0	0	0	0	0	0
50.5	0	0	0	0	0	0	0	0	0	0	0	0	0	0	0	0	0	0	0	0	0	0	0	0	0	0	0	0	0	0	0	0	0	0	0	0
51.5	0	0	0	0	0	0	0	0	0	0	0	0	0	0	0	0	0	0	0	0	0	0	0	0	0	0	0	0	0	0	0	0	0	0	0	0
52.5	0	0	0	0	0	0	0	0	0	0	0	0	0	0	0	0	0	0	0	0	0	0	0	0	0	0	0	0	0	0	0	0	0	0	0	0
53.5	0	0	0	0	0	0	0	0	0	0	0	0	0	0	0	0	0	0	0	0	0	0	0	0	0	0	0	0	0	0	0	0	0	0	0	0
54.5	2.87	2.93	4.2	8.8	4.4	4.6	2.33	2	3.73	6.67	5.33	2.47	6.93	2.67	4.93	5.33	7.87	2.87	6.73	4.13	1.6	1.73	2.47	3.07	3.73	3	3.8	2.07	2	2.6	2.07	5	4.07	7.73	3.07	2.93
55.5	3.8	3.2	5.2	5.33	3.2	5.27	6.8	6.6	6.87	9.87	5.8	4.07	11.13	7	8.6	7.93	11.53	8.33	3.67	9.07	4.8	6	3.13	7.33	6.07	5.67	10.87	3.2	4.6	7.67	2.53	6	9.07	6.47	4	10.87
56.5	6.4	6.67	4.13	5.8	4.53	5.2	7.2	7.13	7.6	8.07	5.13	4.67	6.53	5.93	10.27	7.33	7	5.27	12.8	8.33	3.13	5.53	5.8	5.93	9.27	3.07	8.2	5.47	4.4	2.8	2.67	6.13	2.07	12.73	8.67	6.87
57.5	3.8	7.27	3.27	9.27	5.67	9.33	8.07	7.67	4.73	3.67	8.93	4.73	6	1.67	8.67	8.07	6	7.67	3.2	7.27	4.2	6.93	5.47	8.2	4.33	7.47	5.4	5.73	8.8	7.33	2.53	5.4	8.73	9.2	4	4.87
58.5	3.33	6.4	8.67	8.13	7.2	8.93	9.47	6.87	8.33	8.4	6.13	5.6	7.47	5.47	4.27	3.93	8.2	2.87	10.07	8.6	8.2	6.67	6.67	5.87	12.13	4.53	7.4	4.27	7	5.13	3.67	4.33	4.6	6.2	5.4	5.67
59.5	4.07	2.87	5.93	3.27	3.2	5.47	5.8	4.6	6.73	2.53	2.87	2.33	2.93	3.6	7.4	6.6	5.93	4.87	6.73	6.6	5.07	4.67	2.27	4.4	3.47	4.2	4.8	3.87	2.33	6.27	3.2	3.93	6.67	3.73	2.67	5.07
60.5	0.87	0	2.67	0.87	0.93	1.13	0.27	0	0	1.13	0	0	0	1.33	0	0.33	1.47	0	1.2	0	2.07	1.2	0	0	0	0	0	1.73	0	0	0.8	1.33	1.27	0	0	1.93
61.5	0.4	5.8	5.47	2.8	0	3.33	4.07	1.33	1.4	0	2.6	5.4	1.67	1	0	1	1.07	3.53	1.13	3.67	3.8	0.27	1.07	0	2.07	3.67	0	2.87	0.2	3.4	2.93	0	0	0	0	0.67
62.5	3.13	6.87	7.47	2.27	0	4	1.47	1.47	6.07	0.87	3.67	2.13	4.07	0.73	2.87	2.27	3.2	3.8	4.67	3.13	2.4	2.4	1.07	0	2.13	0	0	0.47	3.07	4.4	1.13	1.13	0	1.8	0	1.67
63.5	0	3.2	6.53	7.67	1.6	2.8	1.87	0	3.27	0	1	5.13	3.93	6.93	0	8.53	4	5.6	0	1.47	5.13	0.6	5.4	0.53	0	5.27	0	0	3.2	0.4	0	0	0	0.4	6.67	1.8
64.5	0	9.33	4.47	0	0.8	7.13	2.27	0.07	0	0	8.07	2.93	1.6	8.13	1.27	0.07	0.73	1.73	4.93	7.27	5.13	0	0	0	6	5.73	0	8.73	0.87	4.67	0	3.87	4.8	0	1.27	1.33
65.5	0	3.8	1.93	4.33	0	1.27	0	8.2	0	6.07	5	0	5.93	0	8.13	1	1.4	7.73	2.47	2.2	1.67	1.67	3.2	0	0.33	1.67	0	4.8	1.93	3.8	2.4	1.6	1.13	8.13	0	0
66.5	0	2.07	1.87	0	0.53	0.87	3.2	4	3	0.6	1.67	5.93	9.67	3.93	0	3.87	3.6	3.93	3	1.33	0	2.67	1.87	4.2	0	1.13	0	3	3.13	0	6.47	0	0	10.07	2.93	6.6
67.5	2.13	7.53	7	2.93	3.47	7.47	3	0	5.07	1.73	6.6	9.87	5.33	7.93	2.47	6.6	0.73	8.47	7.33	7.2	2.93	3.27	8.93	7	9.4	5.2	0.67	7.93	6.27	1.13	2.13	6.2	7.07	0	10.07	3.53
68.5	9.53	6.73	4.2	1.13	8.6	4.6	0	8.4	4.6	6.4	4.2	4.27	5.53	9.33	7.2	2.27	7.47	0.47	5.73	6.8	9.87	11.8	1.07	0	4.33	6	8.33	5.73	5.87	7.6	4.33	5.4	4.2	5.27	9.33	5.27
69.5	0	6.93	0	5	1.27	3.27	2.33	6.47	3.8	1.73	6.33	4.4	5.73	4.33	7.87	7.13	14.2	2.6	0.47	3.2	6.6	2.2	4.73	3.8	0.8	4.33	2.47	8.73	0	1.87	5.93	3.8	5.6	7.27	0.33	6.2
70.5	3.4	8.53	3.6	2.13	0	4.73	9	0	6.4	3.33	4.6	2.47	1.2	3.47	1.47	4.47	2.47	1.47	0	0	6.93	4.2	8.33	5.8	5.27	3.6	0.8	0	3.2	1.53	2.27	0.07	6.33	9.47	2.33	1.53
71.5	3.13	0	2.27	3.2	3.33	0	1.93	0.93	3.33	2.73	0	0	0	0	1.73	0	7	1.73	0	0	2.07	0	1.67	0	0.13	0	2	0.8	1.2	0	0	3.2	0	0.13	0	0
72.5	7.87	5.13	5.27	5.33	12.13	7.53	6.4	8.33	7	9.27	4.87	1.4	6.33	0.8	5.53	4.07	8.8	6.8	4.6	0	2.53	3.8	0	4.07	7.8	6.47	10.13	0.67	4.6	5.53	0	0.47	1.87	5.2	5.6	7
73.5	6.4	5.13	6.07	7.67	10.4	9.27	6.33	5.93	1.53	7.07	3.4	3.67	5.93	6.13	6.73	2.27	7.93	8.73	8.13	6	6.53	8.4	5.73	8.6	9.13	6.13	6.6	3.07	8.53	8.93	0	8.6	9.27	11.8	7.93	4.67
74.5	5.8	7.2	6.73	6.13	2.33	10.13	4.67	4.27	0	8.67	6.47	5.87	3	6	4	6.6	7.87	5.6	3.53	8.47	6.67	7.47	7.47	7.13	7.13	5.33	4.4	3.67	6.6	5.67	7.2	5.87	6.47	5.27	5.73	9.8
75.5	2.87	2.13	1.93	5.47	10.33	7.53	6.6	7	4.93	6.6	6.4	6.13	1.4	6.53	10	3.4	4.93	5.2	8.13	6.4	5	7	4.07	5.87	6.73	7.6	3.8	9.2	1.73	5.07	3.27	6.47	6.87	3.93	4.33	1.87
76.5	2.33	7.73	7	3	0.93	0.93	5.47	1.13	5	6.73	7.8	4.53	2.87	2.07	2.93	9.2	5.67	2.13	5.47	4.6	5.93	3.87	6	1.4	4.6	5.67	6.4	1.07	1.53	3.87	9.8	2.6	2	8.07	2.4	8.93
77.5	7.6	2.07	9.6	11.33	7.93	10.73	2.47	7.2	10	2.6	0.8	4.87	9	5.73	6.07	3.2	6	7.73	5.8	8.13	4.73	5.87	7.67	6.27	7.67	0	4.4	9.67	4.53	7.87	3.8	5.07	7.87	2.2	6.8	4
78.5	1.07	6.6	3.67	6.67	8.73	4	6.33	4.33	6.27	5.6	3.67	6.27	5.6	6.93	8.67	5.73	4.47	4.67	5.53	7.87	8.27	9.13	6.53	8.8	4.27	8.13	9.53	4.13	2.27	7	6.4	4.53	3.07	7.53	5.8	10.87
79.5	9.07	5.73	7.8	8.4	6.73	7.47	4.2	5.8	1.33	8.27	5.47	6.93	5.8	2.2	5.47	6.4	6.07	7.73	4.47	7.8	5.13	6.07	6.87	8.93	9.13	6.53	5.93	9.8	3.4	8.67	4.47	3.8	10	9.8	6.73	5.4
80.5	4	10.13	4.8	5.93	6.6	10.2	6.6	3.73	8.6	6.07	5.27	7.07	8.67	3.53	3.6	7.33	7.6	4.67	9.47	3.87	5.67	5.4	4.13	5.27	4.73	5.53	3.73	4.07	6.2	2.6	5.13	4.33	4	11.13	5.07	5.73
81.5	7.47	2.6	6.67	6.47	5.8	6.4	6	6.87	0.87	4.6	5.27	5.53	1.8	3.53	8.2	4.8	6.8	5.53	3.73	6.93	6.47	6.2	6.8	6.8	6.2	2.87	7.07	6.13	6.93	8.67	3.87	9.6	9	3.87	2.67	7.27
82.5	5.27	4.27	4.8	6.67	5.27	7.67	3.4	4.8	6.8	2	0.93	5.53	5	4.33	4.47	3	6.93	5.13	8.47	3.8	4.8	5.4	2.13	4.27	5.6	4.87	4.67	2.73	1.6	7.47	4.27	0.8	3.93	5.07	6.27	2.2
83.5	2.67	3.2	6.87	4.8	6.13	4.87	2.87	2.4	4.13	3.53	3.4	1.6	3.47	4.73	3.73	2.8	2.27	1.8	1.13	7.47	4.27	3.13	2.93	3.27	3.73	3.07	2.73	1.87	1.07	3.13	1.73	3.4	2.27	3.13	4.47	5.6
84.5	0	0	0.07	0	0	0	0	0	0	0	0	0	0	0	0	0.07	0	0	0	0	1.2	0	0	0	0	0	0	0	0	1.4	0	0	0	0	0	0
85.5	0	0	1.07	1	0	0	0	0	0	0	0.2	0	1.13	0	0	0	0	0	0	0	0.6	0	0	0	0	0	0	0	1.87	0	0	0	0	0	0	0
86.5	0.27	6.07	3.53	3.33	0	0	0.8	0	0.67	0.8	1.2	0.53	2.6	1.13	0	0	0	2.87	0	1.67	1.47	0	0.4	0	0	0.8	0	0	0	2.27	0	0	0	1.87	0	0
87.5	2.07	2.33	4.47	0	2.67	4.67	0	0.33	0	0	1.27	0.6	0.6	2.73	0	2.33	2.33	0	1.73	0	4.8	0	0.87	0	0.8	6.67	0	0	3.67	0	0.6	0	0	0	0	2
88.5	0	1.13	2.93	0.67	0	0	0	1.93	1.2	0	1.6	2.87	0	3.07	0.4	0	2.07	2.07	0	3.2	0.47	0	0.33	0	0	0	0	3.73	0	0	4.4	0.87	0	1.47	3.6	0.33
89.5	0	5.33	0	0	0	0.87	0	0	2.67	1.13	7	0	3.73	2.6	1.73	0	0.6	2.33	0	0	0	0	3.4	0	0	1.6	0	2	2	3.27	0	0	4.07	0	0	0.27
90.5	2.8	3.4	0.4	1.6	0.87	0.53	3.33	4	0.47	2.33	1.6	5.87	7.27	2.2	5	3.13	0	0.93	4.33	5.4	2.53	3.33	0.6	0	1.87	1.53	0	0.73	0	0	2.27	0	0	8.33	0	1.53
91.5	2.47	3.6	5.4	3.67	5.27	2.47	1.67	2.13	4.4	0	3	0.67	0.67	3.6	4.4	8	0	6.13	5.13	5.2	4.47	5.27	4.47	0	4.6	2.93	1.73	8.8	1.4	4.73	0	0	0.27	0.6	6.93	2.13
92.5	1.2	6.8	2.67	1	2.53	0	0	0	5.67	2.93	0	8	2.73	5.6	1	3.93	0	0.93	3.33	1.87	3.6	1.27	5.6	7.93	2.87	2.33	2.73	3.2	6.93	1.67	7.27	3.87	5.33	2.87	2.2	0
93.5	2	2.73	0	2.6	1.53	2	6.27	5.4	4.13	2.53	6.6	1.87	4.2	5.87	5.8	3.13	2.93	1.13	0	0	3.73	7.93	4.67	0.53	1.33	0	4.2	0.87	0	5.13	1.93	1.4	3.13	0.27	2.87	4.6
94.5	1.13	0	6.4	1.4	2.33	0	2.4	1.6	0	1.47	0.73	2.07	3.8	3.07	1.67	2.07	3.07	2.67	0	0	2.6	4.07	2.8	0	2.2	2.73	0	3.87	4.07	1.13	0.53	2.93	2.27	2.33	4.67	5.4
95.5	0	4.4	1.07	3.33	0	0.87	2.67	3.33	1.73	2.27	3.2	0.87	2.8	1.67	3.53	1.27	6.8	0.87	0	0	1.8	0	0	0	5.53	0	1.4	0	0.73	1.8	0	0	0	2.2	2.27	2.6

## Sheet: Fig4B_NREM_recovery
each value represents the amount of time a mouse spend in NREM sleep relative to baseline, accumulated under BL and REC conditions. After REC1, the accumulation restarts.
		WT																				KO
	Time[hours]	_1WT_NO_CIRP03	_1WT_NO_CIRP04	_1WT_NO_CIRP05	_1WT_NO_CIRP09	_1WT_NO_CIRP11	_1WT_NO_CIRP18	_1WT_NO_CIRP19	_1WT_NO_CIRP29	_1WT_NO_CIRP30	_1WT_NO_CIRP31	_1WT_NO_CIRP48	_1WT_YS_TC03	_1WT_YS_TC06	_1WT_YS_TC08	_1WT_YS_TC09	_1WT_YS_TC12	_1WT_YS_TC13	_1WT_YS_TC18	_1WT_YS_TC21	_1WT_YS_TC22	_2KO_NO_CIRP01	_2KO_NO_CIRP10	_2KO_NO_CIRP13	_2KO_NO_CIRP14	_2KO_NO_CIRP15	_2KO_NO_CIRP20	_2KO_NO_CIRP25	_2KO_NO_CIRP40	_2KO_NO_CIRP50	_2KO_YS_TC01	_2KO_YS_TC07	_2KO_YS_TC10	_2KO_YS_TC15	_2KO_YS_TC17	_2KO_YS_TC19	_2KO_YS_TC20
REC1	54	0	0	0	0	0	0	0	0	0	0	0	0	0	0	0	0	0	0	0	0	0	0	0	0	0	0	0	0	0	0	0	0	0	0	0	0
	55	7.67	-3.07	11.2	17.4	-4.8	3.86	-1.47	10.8	-10.8	9.74	-3.67	-8.46	11.2	1.8	-2.4	0.8	-7.27	8.4	-10.8	-1.8	-15.8	-2.47	-13.27	-0.74	7.73	-0.54	-4.47	-13.27	-3.93	7.67	-18.94	35.74	-0.4	16	-1.54	-15.33
	56	-11.73	1.33	1.6	20.87	9.33	-7.34	-2.87	-6.33	-2.26	10.54	-7.14	-11.4	12.6	7.67	0.4	26	-0.13	3.27	-9.53	-0.07	-4.33	15.99	0.27	25.8	13.53	-1.34	1.59	3.66	5.27	16	-12.54	27.07	3.4	15.33	-1.48	-5.06
	57	10.4	11.13	-2.47	14.67	7.4	-6.88	-5.34	18.07	-2.26	11.28	-2.14	-7.87	7.87	3.53	4.94	23.6	8.54	13.6	5.14	4.73	-14.53	16.65	-11.86	17.8	12.86	13.13	-1.95	-1.74	-9.26	26.2	-41.07	27.01	4.8	6	-0.75	-13.66
	58	-4.07	5.86	-23.07	18.4	10.8	-0.68	6.6	8.21	8.61	27.02	8.73	-5.53	15.67	-18.14	13.4	28	3.41	-0.66	1.61	12.27	-15.8	11.65	-9.19	19.4	12.79	11.59	0.58	-2.4	5.81	19.87	-40.14	57.81	15.8	25.4	11.19	-8.06
	59	0.73	6.79	-11.33	18.86	15.66	-0.95	20.8	16.28	11.34	34.16	8.2	-4.26	17.21	-1.34	7.47	26.53	16.41	8.74	-3.93	21.47	-18.33	20.72	-5.86	16.73	11.06	12.99	5.98	-8	11.88	19.47	-32.07	35.55	13.13	24.4	9.59	-5.86
	60	-2.33	6.59	-10.99	19.79	29.39	3.12	27.4	16.28	14.27	30.36	14.13	-4.66	15.01	-4.27	13.41	30.47	23.41	5.34	4.07	18.87	-12.46	29.72	9.6	23.13	19.52	7.99	12.32	-1.53	26.88	36.34	-22.61	38.22	10.53	20.6	27.93	-8.86
	61	2.8	8.59	-10.32	20.26	31.46	12.92	28.8	14.42	14.01	30.36	16.73	-1.73	20.95	-0.54	13.21	36.67	30.81	7.41	19.94	28.47	-7.46	37.52	9.93	23.6	24.26	14.32	12.32	8.34	16.55	38.61	-13.48	36.62	19.93	20.6	28.33	-7.39
	62	2.14	11.59	2.55	38.59	28.93	20.58	54.07	29.09	12.68	24.16	36.46	0.13	9.35	3.33	12.81	42.47	45.55	19.15	22.88	54.6	-15.06	50.52	14.53	25.67	39.66	18.99	13.32	27.87	6.95	57.94	-0.34	32.35	25.66	21.2	28.46	-5.66
	63	21.4	31.99	5.55	50.59	28.06	24.98	63.67	30.55	15.35	22.03	37.32	-6.27	20.68	-10.07	28.27	61	47.62	23.21	33.22	61.26	-24.79	65.59	11.07	29.6	43.6	-12.54	17.45	36	-1.25	58.28	10.93	45.02	29.86	16.6	22.19	-5.39
	64	25.07	25.46	0.35	68.19	38.79	21.91	81.73	20.69	20.42	12.83	26.99	5.53	15.35	-11	28.67	86	52.08	46.74	32.55	62.72	-21.46	61.13	30.27	42.27	42.27	6.79	23.25	9.07	3.61	66.35	11.6	44.35	34.32	21.87	22.52	-1.13
	65	-9.06	25.66	14.35	58.92	38.06	27.31	87.39	9.43	4.82	10.09	32.85	9.2	22.95	5.87	44.14	82.53	51.08	47.14	57.89	87.85	-9.59	50.66	17.67	45.81	52.4	-5.61	21.99	20.87	11.41	77.15	12.6	62.02	63.46	10.47	31.25	-7.33
	66	-9.06	20.13	8.01	74.39	42.39	37.58	67.99	48.03	-4.32	26.49	67.12	-12.86	29.75	-18.67	50.14	54.13	50.95	47.94	28.56	63.45	-28.65	64.92	47.27	49.47	54.14	5.05	15.06	43.2	10.15	85.08	23.33	74.29	67.33	40.41	23.72	-15.06
	67	-18.33	8.93	26.14	62.05	23.72	17.25	90.59	32.69	3.15	20.49	44.92	7.54	58.75	-13.47	33.94	81.66	50.21	46.8	20.5	62.92	-59.12	44.66	31.67	65.74	46	-12.42	6.86	36.6	1.88	73.61	37.67	74.76	27.59	32.88	15.79	14.61
	68	-15.86	13.73	25.28	77.05	48.32	31.65	94.52	24.29	17.69	4.09	55.92	27.21	53.28	-10.94	50.68	99.99	45.21	65.74	32.83	78.52	-50.92	50.13	49.54	54.54	64	13.85	1	39.86	9.02	83.34	29.6	107.16	52.72	21.88	31.32	3.08
	69	-0.86	24.4	26.15	64.65	40.46	23.59	67.59	44.76	9.62	35.02	66.38	16.08	53.34	3.99	42.01	72.79	48.88	54.87	43.83	80.39	-46.32	59.67	39.8	36.47	49.6	-1.48	33.73	27.13	14.42	82.01	26.53	100.09	61.92	30.41	36.65	2.68
	70	-8.26	22.4	17.01	80.59	43.86	40.33	68.93	65.56	11.56	26.48	65.98	7.28	52.4	19.12	47.21	76.66	61.15	55	35.63	81.59	-47.99	57.94	44.6	58.34	43.46	25.52	23.8	40.99	2.55	81.41	30.53	80.36	84.45	45.21	15.58	10.48
	71	5.01	31.8	12.61	74.73	33.92	37.47	100	32.16	19.96	33.02	80.78	6.28	45.66	17.05	57.21	85.2	49.22	56.86	36.9	69.59	-36.19	71.81	55.8	49.21	58.52	23.46	10.94	44.19	4.08	84.21	46.46	87.7	83.18	47.01	20.65	8.14
	72	-0.33	15.6	12.41	69.93	58.58	23.4	87.93	51.09	30.96	16.89	69.04	6.28	45.79	7.25	56.74	80.4	55.09	56.99	24.77	69.72	-55.32	70.41	60.6	43.21	51.39	6.06	16.88	47.05	13.75	71.74	46.46	113.23	69.78	44.54	21.31	-2.92
REC2	73	6.605	9.265	5.195	-3.995	-8.57	-2.4	9.37	7.03	2.1	6.37	-4.635	2.605	11.805	-20.605	1.2	14.27	5.13	5.13	-2.07	-18.57	-11.66	-4.135	-27.035	-10.17	8.435	6.035	2.47	11.535	1.57	-8.505	-27.4	-13.205	11.165	-8.335	7.23	9.47
	74	16.74	10.635	-5.84	6.97	-0.14	-6.635	-0.335	-0.94	-21.03	5.77	1.035	4.74	11.935	-20.675	-2.235	-4.665	1.53	7.43	3.23	-15.935	-4.225	-6.735	-24.13	1.67	12.07	15.4	2.535	-17.765	0.64	-8.345	-54.93	-13.175	15.665	3	9.56	4.705
	75	17.51	11.2	9.03	-0.895	-14.27	-12.1	8.565	-4.14	-35.165	9.54	5.065	11.91	7.57	-17.31	-7.195	17.195	15.865	9.9	-2.775	-17.33	-10.96	-3.335	-25.16	-5.3	10.765	11.5	-5.17	-9.025	11.505	-6.55	-40.425	5.53	20.8	12.4	6.525	20.135
	76	22.11	4.135	-6.335	-4.525	-5.74	-5.935	3.43	12.59	-18.56	8.07	-8.27	12.58	-6.97	-12.475	10.04	-3.24	4.83	15.865	0.165	-20.93	-10.29	-6.165	-27.295	21.87	17.065	7.07	-13.47	-1.795	7.24	-12.68	-37.325	4.025	24.93	0.26	16.565	-3.63
	77	-3.225	7.7	-1.365	-9.13	-25.305	-29.6	1.63	-2.08	-19.16	18.135	-0.905	0.915	-8.5	-31.74	1.74	23.66	4.36	-3.535	-5.565	-19.46	-9.385	-5.4	-19.925	1.14	10.96	30.5	-13.905	-19.265	-9.965	-28.91	-37.495	7.065	-0.33	12.89	-0.765	3.17
	78	10.11	-10.93	15.2	1.11	-15.07	-28.1	-12.335	-6.515	-22.13	4.8	-11.94	3.35	-5.5	-32.21	8.31	23.895	19.855	5.065	1.47	-11.86	-28.98	-15.03	-7.355	5.34	16.66	8.13	-23.865	-3.895	-6.86	-26.51	-51.29	2.33	21.34	-8.215	9.67	-1.995
	79	-9.955	2.705	9.36	-7.29	-18.41	-25.2	-5.605	-0.285	-17.2	-0.035	-29.875	-0.35	1	-17.44	0.745	18.095	12.85	-7.095	-9.335	-25.455	-28.28	-10.525	-11.45	1.71	16.12	25.96	-2.495	-23.26	-20.025	-23.715	-35.355	10.595	-0.86	1.72	2.07	-5.355
	80	-11.42	-5.1	9.89	-8.59	-10.68	-35.03	-13.875	-8.985	-21.395	1.565	-22.61	-7.22	-8.265	-23.575	3.55	32.165	9.58	-0.825	-9.1	-26.295	-30.515	0.605	-1.68	14.475	18.415	20.455	-27.495	-17.055	-21.385	-23.62	-44.95	10.295	8.575	-1.015	-2.265	0.88
	81	-0.75	4.03	14.225	-15.19	-20.58	-26.595	-11.045	-8.19	-17.965	-5.47	-25.245	-5.385	1.57	-29.88	5.75	27.095	17.02	5.145	-3.935	-30.63	-29.745	-6.93	-16.515	5.205	12.415	27.76	-29.23	-19.52	-24.35	-37.685	-44.355	0.43	3.68	3.285	-5.735	-17.95
	82	0.12	-10.17	-1.075	-17.16	-17.05	-25.23	-3.71	-9.685	-25.6	5.165	-18.315	-8.985	-8.365	-30.185	4.81	41.86	17.155	-12.02	-10.37	-30.59	-21.81	-16.135	-4.785	15.305	10.315	22.63	-19.4	-25.02	-12.22	-32.72	-52.825	11.165	11.38	7.05	-6.995	-8.91
	83	9.285	-7.765	-0.275	-20.495	-20.885	-26.835	-3.605	-14.62	-18.965	1.43	-33.085	-11.75	-4.36	-32.415	3.615	43.825	15.72	4.18	-2.035	-35.385	-26.61	-6.465	-7.255	6.97	15.12	18.5	-22.87	-32.255	-16.12	-26.75	-50.525	-6.135	10.875	17.115	-0.83	-16.61
	84	-4.48	-18.1	4.495	-16.46	-9.12	-25.8	-0.375	-13.65	-18.4	7.03	-25.95	-7.285	-10.725	-31.98	2.755	40.29	17.825	-6.22	-4.74	-28.615	-23.945	-12.96	3.375	2.905	14.45	23.97	-27.635	-38.96	-5.425	-24.42	-47.055	-3.235	0.445	10.685	14.035	-12.01
	85	-2.015	-25.9	7.495	-18.29	-12.585	-19.93	-1.935	-16.95	-17.195	7.03	-26.615	-17.125	-11.29	-33.15	1.655	37.555	12.66	-9.215	-1.84	-30.65	-25.315	-13.295	-1.455	3.235	15.315	23.305	-27.635	-39.56	-0.86	-25.655	-46.985	-7.535	-2.785	10.685	13.835	-8.675
	86	-6.05	-38.27	7.225	-8.49	-18.88	-28.535	-6.77	-19.08	-27.565	0.465	-17.08	-31.125	-22.755	-39.05	1.455	37.42	17.26	-11.245	-4.035	-30.65	-35.875	-14.13	3.585	1.605	16.915	5.745	-28.27	-41.295	1.74	-23.785	-51.35	-13.8	-3.155	10.755	14.135	-15.24
	87	11.685	-27.17	13.025	12.74	-19.015	-39.595	0.23	-21.985	-27.135	6.83	-19.38	-33.195	-17.125	-37.515	1.32	29.655	12.43	1.285	-11.465	-19.58	-40.205	-18.995	-3.315	-1.26	10.115	-4.955	-32.105	-45.065	-21.625	-30.385	-51.315	-20.665	-7.225	8.025	10.395	-23.605
	88	13.925	-26.235	15.395	2.705	2.315	-30.3	9.93	-17.32	-37.165	-5.505	-22.115	-24.125	-22.23	-42.585	-2.38	45.555	21.225	-1.91	13.535	-15.62	-45.105	-23.09	-1.815	-1.025	27.25	15.675	-32.705	-58.765	-11.325	-27.515	-47.145	-28.73	-8.595	14.225	-4.105	-18.575
	89	-3.44	-41.065	16.76	4.07	-1.42	-45.87	7.865	-19.22	-35.265	-12.075	-27.55	-22.725	-25.97	-34.28	-1.015	41.55	51.025	17.025	13.035	-4.815	-42.94	-22.255	7.255	-3.025	18.345	-3.39	-35.67	-46.335	-17.155	-41.88	-14.745	-25.565	-16.195	-4.015	2.995	-18.715
	90	1.26	-32.135	-1.27	16	-1.42	-33.105	-1.335	-14.755	-34.065	-22.045	3.58	-38.79	-21.705	-28.045	-0.32	13.42	56.495	14.99	-6.56	-23.785	-62.64	-19.685	20.09	-3.865	10.78	7.475	-42.67	-57.835	-20.315	-27.48	-23.045	-26.63	23.135	1.99	-1.34	-24.35
	91	16.795	-36.205	-4.075	26.295	-10.115	-55.175	13.6	-13.09	-37.83	-2.075	1.82	-19.725	-4.37	-40.045	9.145	34.42	59.895	-0.78	2.705	-12.32	-77.405	-14.88	17.985	-15.97	18.91	-2.995	-46.23	-52.2	-40.45	-41.42	-26.24	-38.695	-4.835	6.76	-4.175	-16.845
	92	-0.27	-47.175	3.195	37.365	25.915	-53.645	22.3	-3.825	-28.6	-28.27	-0.785	-21.895	-26.605	-40.315	4.45	49.95	62.825	25.69	-3.13	-8.185	-66.975	-15.78	34.22	-28.605	4.505	4.94	-49.99	-38.405	-56.92	-23.225	-36.41	-32.395	-6.135	-8.045	4.12	-21.98
	93	-0.37	-33.035	-5.635	38.66	-6.585	-67.98	10.6	-19.66	-28.365	-11.505	-6.455	-18.025	-30.005	-37.95	-5.855	45.25	57.425	9.72	5.205	-20.65	-75.91	-27.315	36.85	1.795	10.04	8.605	-31.595	-55.24	-38.82	-38.155	-21.075	-30.39	-1.13	3.985	-4.65	-38.25
	94	13.96	-43.9	-18.205	42.23	8.145	-66.84	15.935	4.38	-27.465	-13.275	1.475	-26.455	-32.875	-30.045	-0.825	39.885	63.79	1.185	-7.995	-39.315	-72.61	-21.515	37.45	-0.2	-2.53	0.54	-24.425	-63.005	-57.185	-25.585	-47.98	-43.785	11.54	-11.275	-13.08	-48.75
	95	15.125	-61.265	1.26	46.86	13.81	-83.775	29.935	-0.085	-35.63	-13.67	5.44	-29.52	-20.045	-34.645	9.705	32.485	60.625	4.015	-8.16	-49.45	-76.075	-17.515	44.285	-14.805	2.205	15.51	-40.19	-48.64	-48.45	-27.58	-40.85	-27.615	10.01	-15.98	6.22	-37.35
	96	1.955	-38.635	-16.21	52.36	1.245	-86.305	32.295	29.915	-23.03	-18.505	24.31	-22.39	-8.115	-35.345	11.51	39.92	57.195	1.61	-14.525	-43.285	-91.205	-21.585	33.985	-25.475	1.81	1.845	-31.985	-56.11	-51.88	-17.945	-40.85	-27.615	-0.19	-2.91	28.42	-26.885

## Sheet: Fig4B_REM_recovery
each value represents the amount of time a mouse spend in REM sleep relative to baseline, accumulated under BL and REC conditions. After REC1, the accumulation restarts.
		WT																				KO
REC1	Time[Hours]	_1WT_NO_CIRP03	_1WT_NO_CIRP04	_1WT_NO_CIRP05	_1WT_NO_CIRP09	_1WT_NO_CIRP11	_1WT_NO_CIRP18	_1WT_NO_CIRP19	_1WT_NO_CIRP29	_1WT_NO_CIRP30	_1WT_NO_CIRP31	_1WT_NO_CIRP48	_1WT_YS_TC03	_1WT_YS_TC06	_1WT_YS_TC08	_1WT_YS_TC09	_1WT_YS_TC12	_1WT_YS_TC13	_1WT_YS_TC18	_1WT_YS_TC21	_1WT_YS_TC22	_2KO_NO_CIRP01	_2KO_NO_CIRP10	_2KO_NO_CIRP13	_2KO_NO_CIRP14	_2KO_NO_CIRP15	_2KO_NO_CIRP20	_2KO_NO_CIRP25	_2KO_NO_CIRP40	_2KO_NO_CIRP50	_2KO_YS_TC01	_2KO_YS_TC07	_2KO_YS_TC10	_2KO_YS_TC15	_2KO_YS_TC17	_2KO_YS_TC19	_2KO_YS_TC20
	54	0	0	0	0	0	0	0	0	0	0	0	0	0	0	0	0	0	0	0	0	0	0	0	0	0	0	0	0	0	0	0	0	0	0	0	0
	55	-4.03	-3.67	-4.865	1.765	-3.17	-1.7	-5.77	-1.665	-2.57	-2.8	0.695	-3.765	0.795	-2.895	-3.17	-2.17	1.9	-2.93	-2.97	-4.17	-4	-6.2	-6.465	-5.83	-2.4	-2.67	0.765	-5.2	-2.965	-0.9	-4.23	-0.8	-2.13	-4.365	-3.535	0
	56	-7.495	-8.6	-7.165	-1.87	-7.135	-4.365	-3.335	-1.935	-0.1	-0.43	1.16	-5.56	6.56	-1.995	-0.335	1.96	7.53	0.2	-2.5	-1.1	-5.065	-6.8	-8.635	-3.735	-3.795	-1.935	3.535	-8.4	-1.3	1.37	-6.765	2.265	0.41	-5.8	1.47	-15.33
	57	-5.225	-7.63	-8.735	-1.205	-9.24	-5.2	-3.87	-0.305	1.77	3.14	-0.31	-5.79	6.925	-1.83	3.035	1.76	7.765	-1.795	4.065	1.73	-8.8	-7.805	-10.435	-6.235	-1.29	-3.2	4.1	-8.365	-4.335	-1.53	-9.995	-0.47	-3.05	-1.53	1.64	-5.06
	58	-7.525	-7.46	-13.365	0.3	-8.5	-3.37	1.2	3.495	1.9	0.88	4.59	-4.695	8.56	-5.325	6.04	3.16	7.73	0.71	2.565	5.7	-12.23	-9.31	-11.6	-4.3	-4.295	-3.495	3.7	-7.9	1.365	-1.565	-11.235	2.73	-0.12	0.47	1.44	-13.66
	59	-8.895	-7.43	-9.625	0.73	-7.235	-1.705	6.605	5.93	5.495	3.045	6.92	-3.93	11.86	-4.455	6.31	1.625	8.7	0.48	5.665	7.035	-12.4	-7.04	-10.33	-3.895	1.5	-2.895	7	-7.33	3.43	-2.265	-11.6	2.36	-1.755	2.1	1.11	-8.06
	60	-8.895	-9.46	-7.695	0.865	-7.035	0.3	9.635	7.065	8.525	2.34	7.455	-4.365	12.59	-5.355	9.74	4.425	11.295	2.015	10.525	10.035	-12.73	-6.235	-9.895	-5.13	2.77	-0.395	6.665	-5.46	4.095	2.57	-9.765	2.525	0.915	3.47	2.11	-5.86
	61	-8.025	-9.46	-5.025	1.735	-6.105	1.43	9.905	7.065	8.525	3.47	7.155	-5.065	12.59	-4.025	9.74	4.19	12.765	1.815	11.525	9.135	-12.295	-5.035	-9.895	-5.13	2.77	-0.395	6.665	-3.73	4.095	2.57	-8.965	3.555	2.185	3.47	3.94	-8.86
	62	-8.39	-6.625	-1.655	4.535	-6.105	3.23	13.975	8.295	8.525	3.47	8.92	-0.535	12.93	-3.025	9.74	5.19	13.535	5.345	12.655	12.805	-11.36	-4.765	-9.06	-5.13	4.84	2.605	6.665	-0.86	2.065	5.97	-6.735	3.555	2.185	3.47	3.875	-7.39
	63	-5.26	-1.72	3.245	6.64	-6.105	6.23	15.445	9.43	13.295	4.34	11.09	-1.205	16.335	-4.095	12.61	6.895	16.335	8.61	16.29	15.935	-11.76	-2.365	-9.855	-5.295	5.67	0.94	6.3	-0.39	1.57	8.6	-5.605	4.685	2.185	3.47	4.245	-5.66
	64	-5.26	-1.62	8.51	13.91	-4.505	7.83	17.315	8.36	15.73	1.74	9.92	3.46	18.7	-1.965	12.61	15.425	19.47	13.545	16.29	16.77	-10.03	-1.765	-5.02	-4.765	5.67	5.645	6.3	-1.29	4.705	9	-6.405	3.92	2.185	7.005	5.88	-5.39
	65	-7.325	3.745	10.18	12.94	-3.705	12.96	19.585	8.065	15.465	1.74	14.09	4.89	19.235	3.135	12.715	15.36	20.2	13.975	21.22	21.305	-6.1	-3.065	-6.385	-5.4	10.97	9.61	6.3	3.84	4.61	12.105	-6.405	6.055	5.32	5.21	6.275	-1.13
	66	-7.49	3.015	11.51	17.27	-3.705	14.065	18.55	16.265	13.23	6.575	17.755	4.125	24.1	0.635	19.815	12.395	20.2	17.77	21.39	19.94	-6.13	-1.395	-5.15	-5.4	9.835	10.415	5.565	5.275	4.775	15.64	-4.605	7.655	6.45	3.575	4.305	-7.33
	67	-8.09	2.185	11.815	17.27	-5.675	11.635	20.55	15.835	15.83	5.81	17.225	8.49	32.27	1.865	18.28	16.265	23.135	18.5	18.69	17.135	-10.13	-0.99	-4.715	-1.565	7.9	8.38	4.8	7.805	6.24	14.975	-2.205	6.72	3.95	4.005	9.84	-15.06
	68	-8.36	3.55	17.715	19.265	-2.205	17.875	21.785	15.335	19.7	3.105	18.16	17.86	32.9	5.865	16.82	20.665	21.03	26.47	21.12	19.835	-11.235	1.445	1.38	0.435	14.4	12.78	3.54	10.035	8.84	14.67	-1.14	12.92	8.25	11.01	9.005	14.61
	69	-0.1	8.215	19.88	19.795	1.195	21.545	19.95	21.57	23.035	8.67	20.26	15.265	36.03	11.43	17.785	13.57	27.265	22.11	24.68	20.1	-4.63	7.31	-2.78	-1.865	15.03	15.38	10.97	8.3	13.41	16.205	-0.38	14.455	9.05	14.74	9.575	3.08
	70	-2.4	11.48	18.08	23.53	0.765	24.25	17.915	25.005	25.105	7.4	22.355	11.2	38.86	12.425	22.29	16.37	40.3	23.11	21.815	20.43	-2.065	6.31	-2.48	0.4	11.295	19.245	10.775	12.195	10.645	15.31	0.315	16.99	12.885	10.805	9.075	2.68
	71	-1.1	18.84	21.08	25.03	-1.3	27.78	25.615	22.605	30.04	9.3	25.42	11.5	39.36	12.195	21.025	19.075	39.705	23.215	21.815	20.13	2.035	6.845	3.38	4.5	12.865	21.61	10.71	10.195	12.915	15.105	2.45	15.795	17.285	10.835	7.405	10.48
	72	1.06	17.14	22.085	27.66	1.565	26.61	25.88	23.4	32.07	8.165	25.42	11.135	38.23	10.73	21.69	18.71	40.04	24.58	21.815	20.13	0.57	6.78	3.72	2.7	12.33	18.775	12.175	10.525	12.78	14.64	2.45	18.995	16.45	10.835	7.205	8.14
REC2	73	1.905	-1.035	-2.665	-1.135	6.995	-1.57	1.57	1.93	1.1	0.14	0.24	0.435	3.23	-4.765	0.065	0.9	-2.3	-2.43	-1.765	-2.735	-4.105	0.7	-6.6	-4.195	3.965	0.27	2.395	0.305	0.665	-0.07	-2.535	-2.36	-0.895	-4.5	1.335	2.8
	74	3.275	-1.64	-3.53	-0.93	10.13	-1.9	-0.3	1.025	-3.205	-1.99	-0.195	0.14	2.895	-5.27	0.195	-2.53	-0.37	0.17	-2	-7.1	-3.71	0.2	-8.635	-2.06	5.33	1.335	1.695	-1.49	1.595	1.96	-8.135	-1.125	2.275	-2.335	4.465	-0.5
	75	2.575	-3.44	-4.465	-3.235	7.695	-1.77	-1.765	-1.975	-9.84	-1.82	2.875	-0.855	-1.105	-5.805	-1.14	1.5	-0.03	0.44	-2.135	-4.33	-0.905	0.24	-7.2	-6.065	2.13	0.23	2.16	-1.32	2.725	2.9	-4.035	2.48	5.315	-1.13	5.395	1
	76	3.58	-6.41	-7.105	-6.63	10.56	-0.975	-2.835	1.39	-7.64	-1.255	1.84	0.44	-4.635	-5.845	4.16	-2.165	-2.335	-0.59	-1.37	-6.965	-5.37	-0.225	-8.73	-2.56	5.995	1	-2.275	1.415	1.955	3.97	-5.3	2.45	5.05	-5.3	5.66	-4.13
	77	-1.355	-6.38	-7.905	-13.565	4.755	-7.31	-3.93	-0.345	-9.04	1.71	3.605	-1.665	-7.03	-7.34	-0.075	3.905	-2.635	-6.39	-2.865	-5.765	-3.575	0.38	-6.095	-5.76	0.26	1.94	-2.61	-3.55	-4.35	0.605	-2.265	3.115	0.35	-2.03	2.625	1.565
	78	1.81	-10.545	-3.34	-7.2	3.885	-5.68	-6.09	-1.245	-7.91	1.04	-0.495	-3.125	-4.265	-6.945	0.76	1.47	0.2	-3.395	-0.4	-2.435	-4.81	1.15	-4.025	-7.89	0.995	-2.36	-9.475	4.255	-3.62	2.405	-4.465	3.15	5.05	-8.13	5.06	0.435
	79	-4.02	-10.545	-8.735	-7.565	5.045	-7.98	-7.86	-0.58	-7.94	-2.83	-1.46	-3.09	-4.8	-5.58	1.33	-0.3	-1.3	-4.525	-4.57	-2.865	-2.14	2.35	-6.43	-7.99	-0.865	0.1	-2.98	1.115	-6.315	5.905	-4.365	1.88	1.92	-6.465	3.425	4.84
	80	-2.215	-12.945	-8.435	-8.13	4.61	-8.445	-8.025	-1.65	-11.01	-2.06	-1.325	-2.025	-4.365	-9.48	1.035	2.3	-1.13	-1.995	-3.3	-1.065	-2.875	1.82	-4.86	-4.295	0.8	1.695	-5.15	4.515	-5.85	9.175	-4.96	2.745	5.39	-6.165	4.72	4.375
	81	-2.345	-8.515	-9.335	-7.335	4.575	-4.28	-9.16	-3.42	-8.14	-0.49	-2.655	0.145	-1.86	-11.715	-2.265	2.1	-0.295	-4.59	-0.065	-2.695	-4.07	0.685	-8.33	-7.455	-1.235	2.89	-9.055	3.15	-7.085	6.075	-5.73	-1.79	3.86	-1.865	5.39	3.405
	82	-0.975	-13.015	-10.565	-8.63	5.445	-5.38	-6.16	-0.42	-11.87	-1.82	-1.415	2.04	-4.425	-13.35	0.27	0.23	0.47	-4.225	-1.035	0.935	-5.23	-1.55	-8.165	-6.92	-2.37	-2.005	-7.785	4.015	-3.255	7.38	-5.63	5.61	7.06	-0.195	6.06	5.605
	83	-0.405	-15.115	-10.695	-9.66	4.78	-4.975	-6.825	-0.055	-9.805	-6.055	-4.285	2.735	-3.595	-13.62	0.74	-2.235	0.17	-2.195	0.465	-2.53	-8.8	-0.55	-11.435	-8.115	-3.105	-1.065	-7.215	3.045	-6.59	9.02	-5.395	1.71	4.755	-1.29	8.56	1.805
	84	-1.805	-16.815	-7.825	-7.995	7.91	-3.57	-6.725	-1.12	-9.375	-5.76	-3.22	1.57	-2.325	-13.39	0.5	-3.235	-0.895	-3.73	-0.275	1.34	-9.93	-1.285	-10.34	-10.48	-1.575	0.305	-9.62	2.915	-7.185	10.715	-5.03	1.345	3.025	-2.56	11.73	3.335
	85	-1.805	-16.815	-7.755	-7.995	7.91	-3.57	-6.725	-1.12	-9.375	-5.76	-3.52	0.87	-2.325	-13.39	0.5	-3.73	-0.895	-3.93	-0.475	0.44	-10.365	-1.285	-10.34	-10.48	-1.575	0.305	-9.62	2.915	-7.185	12.115	-5.03	1.045	3.025	-2.56	11.73	3.235
	86	-2.57	-19.78	-8.785	-6.995	7.91	-5.1	-6.725	-1.22	-10.775	-5.76	-4.155	0	-2.525	-13.39	0.5	-3.73	-1.195	-3.93	-0.475	0.44	-12.63	-1.285	-10.575	-10.48	-1.575	-0.365	-9.62	2.915	-7.545	12.115	-5.73	1.045	3.025	-2.56	11.73	2.5
	87	-2.3	-15.675	-7.825	-3.83	7.91	-6.1	-5.925	-1.555	-11.405	-4.96	-4.455	-2.27	-0.59	-14.06	0.5	-4.295	-1.595	-1.595	-1.51	2.11	-13.96	-1.285	-12.04	-10.645	-2.875	-1.23	-9.985	2.915	-11.11	12.615	-5.73	1.045	3.025	-2.49	11.73	1.2
	88	-0.23	-16.445	-4.62	-4.23	10.58	-2.63	-5.925	-2.295	-12.24	-7.56	-5.355	-2.135	-1.555	-16.13	0.5	-1.965	-0.13	-2.26	0.22	1.475	-12.56	-1.285	-11.735	-10.645	-2.075	4.875	-9.985	2.015	-7.505	12.615	-5.93	0.28	3.025	-2.49	8.595	3.035
	89	-2.295	-19.28	-4.49	-4.53	10.58	-4.63	-5.925	-0.73	-11.305	-7.56	-7.655	-0.765	-2.62	-16.09	-0.265	-2.1	1.94	-1.49	0.22	1.94	-13.29	-2.585	-12.77	-11.28	-2.775	3.11	-9.985	2.145	-8.47	11.05	-1.53	-0.585	1.36	-3.12	9.13	2.43
	90	-2.46	-18.48	-5.09	-4.53	10.58	-3.925	-6.96	-0.73	-10.87	-7.665	-1.99	-1.53	0.045	-15.99	0.435	-6.065	1.14	-3.095	-2.08	-1.625	-14.99	-2.585	-11.335	-11.28	-4.24	3.845	-10.72	0.78	-8.235	14.055	-2.13	-0.585	5.43	-3.72	7.495	0.73
	91	-0.26	-17.98	-6.255	-2.93	8.95	-6.695	-4.83	-1.16	-10.8	-6.7	-2.59	2.775	5.815	-16.49	3.9	-2.935	0.475	-5.365	-3.45	-0.36	-16.46	-1.52	-12.17	-11.645	-4.305	2.21	-11.485	1.04	-9.9	13.39	-3.93	-1.52	2.93	-1.155	4.995	1.195
	92	-0.19	-20.545	-1.955	-0.195	14.22	-5.455	-4.925	0.47	-7.6	-11.135	-5.255	2.945	1.785	-16.82	4.37	2.865	-2.36	0.265	-3.22	0.34	-16.025	2.915	-10.535	-16.645	-2.605	4.34	-11.685	4.14	-12.17	16.685	-4.995	-1.52	0.43	-3.12	8.86	-1.04
	93	-0.26	-15.81	-1.32	0.205	11.55	-6.385	-6.76	-1.695	-3.195	-9.04	-7.355	4.08	2.115	-14.985	-0.865	-2.57	-3.595	-3.635	-2.06	-4.325	-15.69	-1.75	-10.165	-11.015	-3.435	3.27	-9.855	-0.125	-6.54	12.29	-1.295	-1.515	2.36	-2.515	5.46	-5.74
	94	-0.56	-16.745	-3.12	1.54	11.38	-4.95	-4.855	0.67	-0.795	-9.51	-4.99	-2.515	3.415	-12.45	1.57	-3.77	-1.83	-4.105	-5.395	-7.195	-15.995	2.98	-9.925	-12.02	-6.64	2.805	-8.32	-4.09	-9.305	14.655	-4.6	-1.38	3.725	-6.68	4.065	-7.84
	95	-1.53	-17.915	2.68	2.31	11.645	-6.15	-3.755	-0.13	-2.26	-9.47	-5.795	-2.615	6.515	-13.08	0.505	-3.465	-1.825	-2.8	-5.395	-7.495	-16.225	3.385	-9.595	-13.72	-8.14	4.3	-9.185	-2.22	-6.165	14.05	-4.205	0.285	4.065	-8.52	6.435	-5.64
	96	-2.5	-15.215	2.485	5.07	11.18	-6.45	-2.75	3.065	-1.83	-11.065	-2.595	-2.11	8.185	-12.875	2.97	-2.56	-1.69	-2.295	-5.395	-7.495	-17.96	3.32	-10.925	-15.52	-3.275	1.465	-8.32	-2.69	-6.77	15.385	-4.205	0.285	3.23	-7.785	8.705	-3.24
