# Supplementary material for: Cold-inducible RNA-binding protein (CIRBP) adjusts clock-gene expression and REM-sleep recovery following sleep deprivation
Source: eLife. 2019 Feb 5;8:e43400. doi: 10.7554/eLife.43400 (PMC6379088; doi:10.7554/eLife.43400)
Supplement: Figure 6—figure supplement 1—source data 1. [file elife-43400-fig6-figsupp1-data1.xlsx]

## Sheet: quietWaking(BL_dark)
Each value represents the relative amount of power in a given frequency bin (column A); the data is depicted against a weighted reference as described in material and methods. Each columns represents data of one mouse
	WT																				KO
Freq[Hz]	_1WT_NO_CIRP03	_1WT_NO_CIRP04	_1WT_NO_CIRP05	_1WT_NO_CIRP09	_1WT_NO_CIRP11	_1WT_NO_CIRP18	_1WT_NO_CIRP19	_1WT_NO_CIRP29	_1WT_NO_CIRP30	_1WT_NO_CIRP31	_1WT_NO_CIRP48	_1WT_YS_TC03	_1WT_YS_TC06	_1WT_YS_TC08	_1WT_YS_TC09	_1WT_YS_TC12	_1WT_YS_TC13	_1WT_YS_TC18	_1WT_YS_TC21	_1WT_YS_TC22	_2KO_NO_CIRP01	_2KO_NO_CIRP10	_2KO_NO_CIRP13	_2KO_NO_CIRP14	_2KO_NO_CIRP15	_2KO_NO_CIRP20	_2KO_NO_CIRP25	_2KO_NO_CIRP40	_2KO_NO_CIRP50	_2KO_YS_TC01	_2KO_YS_TC07	_2KO_YS_TC10	_2KO_YS_TC15	_2KO_YS_TC16	_2KO_YS_TC17	_2KO_YS_TC19	_2KO_YS_TC20
0.75	0.567	0.7085	0.821	1.492	0.922	1.355	0.82	0.672	0.7475	0.694	0.6165	0.862	1.0215	0.8125	0.825	0.9645	0.479	0.6865	0.583	0.669	0.9045	0.728	0.8585	0.913	1.0955	0.849	1.311	0.817	0.641	0.652	0.7385	0.7515	0.8445	0.814	1.018	0.668	0.779
1	0.8345	0.9555	1.096	1.6465	1.084	1.5645	1.2285	0.983	0.9725	0.802	0.842	1.0855	1.2595	1.123	0.996	1.139	0.6535	1.042	0.8255	0.878	1.038	1.053	1.1035	1.129	1.2035	1.053	1.2905	1.144	0.925	0.8945	0.9145	0.9425	0.986	0.947	1.1645	0.9535	1.0285
1.25	1.024	1.1695	1.2275	1.696	1.276	1.725	1.5015	1.2455	1.1575	0.939	1.0155	1.239	1.323	1.333	1.138	1.263	0.7545	1.22	0.978	1.0305	1.1145	1.2675	1.257	1.291	1.2615	1.234	1.279	1.3955	1.1325	1.06	1.0415	1.0825	1.161	1.0465	1.2145	1.1705	1.212
1.5	1.0885	1.2875	1.2565	1.6605	1.3435	1.6655	1.507	1.3765	1.1745	1.039	1.099	1.27	1.2855	1.3915	1.2005	1.2805	0.7955	1.2025	1.049	1.0825	1.175	1.3685	1.309	1.3155	1.258	1.2755	1.265	1.495	1.1845	1.1325	1.0865	1.1185	1.254	1.0755	1.2045	1.255	1.253
1.75	1.11	1.3315	1.264	1.608	1.3135	1.634	1.495	1.405	1.1915	1.087	1.1	1.2245	1.2085	1.3415	1.196	1.2485	0.8235	1.1185	1.063	1.0505	1.227	1.3815	1.295	1.302	1.261	1.2395	1.1285	1.524	1.157	1.1525	1.056	1.127	1.252	1.0555	1.117	1.216	1.1695
2	1.0935	1.3085	1.2565	1.5675	1.2565	1.529	1.4905	1.3635	1.131	1.073	1.0855	1.1665	1.1225	1.2745	1.187	1.165	0.8445	1.132	1.0505	0.9875	1.274	1.372	1.2585	1.1805	1.2025	1.1975	1.066	1.4405	1.076	1.1595	1.019	1.1625	1.2215	1.003	1.0955	1.16	1.0815
2.25	1.0905	1.3205	1.185	1.559	1.203	1.4325	1.4865	1.3515	1.1145	1.0735	1.052	1.155	1.0885	1.194	1.1765	1.0935	0.8705	1.1695	1.05	0.9735	1.2725	1.3545	1.207	1.129	1.1815	1.14	1.0635	1.4345	1.072	1.1385	1.013	1.163	1.1485	0.915	1.094	1.1365	1.0315
2.5	1.072	1.38	1.146	1.5605	1.204	1.3555	1.514	1.3645	1.102	1.077	1.0475	1.163	1.034	1.2215	1.2125	1.0655	0.93	1.173	1.0955	0.9615	1.3325	1.32	1.211	1.076	1.168	1.0885	1.0155	1.43	1.088	1.1735	0.989	1.1965	1.0955	0.8635	1.064	1.1325	1.0065
2.75	1.1105	1.514	1.1665	1.586	1.1975	1.3395	1.574	1.41	1.0895	1.082	1.0925	1.185	0.975	1.239	1.242	1.0315	1.0155	1.205	1.1645	1.003	1.5065	1.3315	1.234	1.151	1.15	1.0345	0.9805	1.4485	1.0685	1.2485	0.9515	1.2425	1.099	0.876	1.0145	1.15	1.0125
3	1.115	1.629	1.206	1.6565	1.206	1.3545	1.6675	1.5235	1.159	1.126	1.129	1.241	0.9475	1.2835	1.3655	1.062	1.1	1.32	1.3125	1.067	1.703	1.37	1.269	1.1655	1.192	1.0335	1.0225	1.5135	1.0975	1.3345	0.9695	1.2985	1.0945	0.871	1.0425	1.1875	1.0155
3.25	1.1845	1.804	1.3235	1.701	1.3165	1.433	1.8085	1.6405	1.185	1.2305	1.201	1.2895	0.972	1.364	1.489	1.0845	1.261	1.4895	1.496	1.124	1.974	1.431	1.367	1.208	1.2645	1.078	1.0945	1.5875	1.161	1.4605	0.99	1.3975	1.1635	0.9025	1.0435	1.2535	1.0655
3.5	1.295	1.9465	1.4705	1.754	1.502	1.609	2.029	1.762	1.273	1.4055	1.337	1.394	1.0585	1.525	1.615	1.163	1.4265	1.633	1.6785	1.2725	2.181	1.5505	1.5435	1.306	1.3695	1.1675	1.1475	1.809	1.2565	1.6915	1.0845	1.5235	1.2665	0.978	1.121	1.348	1.189
3.75	1.4215	1.97	1.582	1.782	1.609	1.7365	2.241	1.899	1.4005	1.566	1.4415	1.5985	1.1095	1.7175	1.637	1.269	1.6015	1.6735	1.796	1.395	2.279	1.64	1.7155	1.4445	1.512	1.2295	1.184	2.073	1.418	1.9135	1.144	1.598	1.3285	1.005	1.17	1.431	1.289
4	1.537	1.9635	1.7	1.8485	1.709	1.8765	2.3305	1.9645	1.566	1.7615	1.513	1.7455	1.154	1.8815	1.7525	1.3475	1.6845	1.704	1.7715	1.404	2.195	1.7285	1.8495	1.578	1.5965	1.279	1.3165	2.2445	1.5795	2.155	1.277	1.5935	1.374	1.0075	1.118	1.4425	1.4295
4.25	1.625	1.906	1.7855	1.994	1.8295	2.0205	2.34	1.905	1.779	1.993	1.513	1.7125	1.202	1.9455	1.7905	1.417	1.698	1.684	1.7235	1.3865	2.0555	1.8405	2.096	1.6405	1.679	1.343	1.4255	2.327	1.6845	2.293	1.4015	1.6175	1.4545	1.073	1.1865	1.4835	1.5735
4.5	1.671	1.828	1.784	2.104	1.88	2.149	2.2265	1.954	1.898	2.171	1.4945	1.5955	1.2105	1.822	1.786	1.4515	1.632	1.605	1.6575	1.358	1.812	1.856	2.359	1.7905	1.7015	1.3695	1.57	2.3375	1.715	2.3375	1.4555	1.6115	1.437	1.0435	1.3035	1.5015	1.702
4.75	1.681	1.8275	1.758	2.12	1.924	2.1205	2.044	1.8865	2.0145	2.252	1.4495	1.436	1.1745	1.701	1.75	1.391	1.5125	1.52	1.5545	1.236	1.6085	1.7685	2.348	1.96	1.6835	1.3965	1.7035	2.291	1.654	2.362	1.4385	1.468	1.3815	1.038	1.3425	1.421	1.685
5	1.656	1.7935	1.686	2.108	1.8825	2.0365	1.917	1.724	2.1775	2.167	1.404	1.2975	1.1595	1.546	1.744	1.3805	1.3285	1.4295	1.455	1.125	1.467	1.6665	2.2605	2.1585	1.596	1.378	1.8435	2.0945	1.5185	2.1675	1.3755	1.3165	1.323	0.971	1.262	1.329	1.618
5.25	1.578	1.814	1.608	2.023	1.8995	1.954	1.744	1.632	2.121	1.9935	1.3785	1.1785	1.1085	1.4065	1.69	1.303	1.227	1.3205	1.318	1.0235	1.432	1.485	2.005	2.17	1.4715	1.352	1.783	1.8765	1.452	1.9435	1.3195	1.1835	1.267	0.92	1.174	1.298	1.505
5.5	1.53	1.8375	1.5375	1.97	1.843	1.8055	1.6775	1.525	2.0335	1.839	1.3365	1.1265	1.091	1.3495	1.5805	1.249	1.174	1.296	1.256	0.9935	1.415	1.2855	1.8545	1.957	1.3915	1.323	1.7605	1.763	1.339	1.7105	1.2615	1.1185	1.1875	0.8705	1.2175	1.184	1.367
5.75	1.437	1.9435	1.4795	1.934	1.783	1.755	1.6175	1.4505	1.946	1.646	1.294	1.071	1.058	1.29	1.514	1.1975	1.1315	1.2635	1.1905	0.9665	1.4545	1.1725	1.7755	1.9355	1.3445	1.386	1.5905	1.687	1.2775	1.493	1.198	1.0635	1.139	0.831	1.2575	1.1175	1.2265
6	1.379	1.946	1.4585	1.907	1.76	1.735	1.552	1.441	1.8925	1.563	1.295	1.017	1.028	1.2465	1.5015	1.143	1.1075	1.222	1.166	0.929	1.543	1.129	1.6735	1.776	1.32	1.461	1.4785	1.6215	1.257	1.379	1.172	1.008	1.1575	0.816	1.268	1.081	1.1365
6.25	1.3845	1.8485	1.4105	1.844	1.684	1.683	1.4805	1.41	1.8235	1.461	1.27	0.99	1.01	1.213	1.424	1.13	1.046	1.224	1.1395	0.9345	1.5845	1.087	1.6605	1.6425	1.2435	1.4805	1.382	1.5805	1.2645	1.2655	1.132	0.9735	1.1355	0.7815	1.271	1.036	1.0275
6.5	1.341	1.712	1.374	1.765	1.5345	1.6145	1.41	1.3395	1.6605	1.3575	1.225	0.951	0.992	1.0985	1.359	1.0625	0.998	1.194	1.09	0.9025	1.5045	1.0635	1.5415	1.524	1.1755	1.4415	1.299	1.4555	1.2055	1.153	1.08	0.919	1.0915	0.77	1.159	0.978	0.9745
6.75	1.13	1.414	1.139	1.551	1.3025	1.346	1.252	1.146	1.397	1.189	1.0765	0.839	0.8815	0.9485	1.2075	0.9435	0.9315	1.06	0.9745	0.8205	1.279	0.9915	1.302	1.2965	1.0725	1.2325	1.107	1.2325	1.053	1.024	0.95	0.8535	0.9485	0.682	1.009	0.874	0.8765
7	1.031	1.2505	1.039	1.4005	1.195	1.2045	1.1475	1.091	1.248	1.108	1.0155	0.7845	0.8205	0.8625	1.1145	0.8525	0.865	0.9855	0.905	0.759	1.1205	0.909	1.2375	1.2165	0.9775	1.0375	1.029	1.1255	1.0105	0.944	0.88	0.8085	0.87	0.6395	0.918	0.809	0.7865
7.25	0.9765	1.134	0.981	1.301	1.125	1.1295	1.0745	1.0435	1.145	1.0405	0.9655	0.755	0.7835	0.7865	1.0375	0.796	0.8245	0.9165	0.8375	0.7115	1.021	0.8605	1.174	1.2015	0.9155	0.9805	0.9695	1.0775	0.9515	0.888	0.8275	0.8065	0.8125	0.613	0.862	0.7845	0.7425
7.5	0.9005	1.004	0.886	1.2645	1.0205	1.0135	1.013	0.96	1.0465	0.9975	0.903	0.6975	0.743	0.736	0.9505	0.757	0.7855	0.865	0.7725	0.682	0.922	0.8035	1.087	1.1675	0.8665	0.921	0.9385	0.9815	0.875	0.837	0.784	0.778	0.7495	0.616	0.837	0.737	0.7125
7.75	0.843	0.9085	0.823	1.2045	0.9485	0.9705	0.938	0.875	0.964	0.924	0.8365	0.6885	0.721	0.6855	0.9025	0.748	0.739	0.8085	0.7165	0.635	0.864	0.752	1.013	1.113	0.813	0.857	0.878	0.9115	0.818	0.78	0.726	0.74	0.6985	0.599	0.786	0.691	0.6845
8	0.818	0.8305	0.77	1.1195	0.89	0.9175	0.879	0.8045	0.8535	0.8595	0.793	0.824	0.709	0.6535	0.974	0.878	0.683	0.745	0.6595	0.5815	0.81	0.685	0.9025	1.024	0.746	0.804	0.851	0.8325	0.758	0.805	0.687	0.737	0.66	0.5885	0.7355	0.6655	0.648
8.25	0.742	0.7585	0.6845	1.044	0.8355	0.8325	0.786	0.749	0.7595	0.8085	0.7125	0.6115	0.6355	0.5995	0.7685	0.662	0.6105	0.6865	0.605	0.5565	0.7155	0.6145	0.821	0.975	0.6885	0.74	0.795	0.7675	0.7245	0.673	0.638	0.6525	0.613	0.5545	0.701	0.595	0.593
8.5	0.696	0.6995	0.6175	0.945	0.777	0.777	0.7065	0.697	0.704	0.7505	0.677	0.5335	0.5815	0.5535	0.6945	0.599	0.5615	0.6245	0.552	0.5295	0.65	0.5855	0.754	0.9395	0.6635	0.6845	0.7185	0.713	0.661	0.6205	0.584	0.596	0.54	0.5435	0.6375	0.542	0.573
8.75	0.6415	0.6465	0.5745	0.878	0.7165	0.7145	0.647	0.665	0.6575	0.712	0.63	0.511	0.558	0.5175	0.656	0.567	0.518	0.557	0.4995	0.4875	0.5875	0.545	0.6875	0.91	0.6225	0.64	0.686	0.648	0.6065	0.5695	0.5365	0.559	0.4905	0.5145	0.5965	0.522	0.5415
9	0.611	0.599	0.5205	0.8065	0.674	0.6585	0.607	0.6065	0.6125	0.655	0.5815	0.468	0.5085	0.488	0.6155	0.5255	0.473	0.5175	0.4585	0.448	0.5395	0.5145	0.635	0.7995	0.5905	0.598	0.657	0.613	0.554	0.5385	0.4935	0.521	0.459	0.488	0.552	0.493	0.521
9.25	0.562	0.5425	0.4825	0.7505	0.618	0.626	0.5735	0.553	0.561	0.607	0.5505	0.4355	0.4695	0.452	0.5725	0.5045	0.4365	0.49	0.4175	0.4125	0.5085	0.49	0.5845	0.741	0.545	0.5675	0.621	0.5655	0.5135	0.499	0.4705	0.4735	0.42	0.454	0.518	0.4595	0.484
9.5	0.525	0.4985	0.459	0.681	0.5805	0.5715	0.5285	0.524	0.5185	0.553	0.5055	0.407	0.4485	0.4175	0.5255	0.48	0.3975	0.444	0.387	0.3875	0.477	0.4425	0.5285	0.7025	0.521	0.5105	0.5845	0.508	0.488	0.4585	0.4375	0.436	0.388	0.4175	0.509	0.424	0.4575
9.75	0.496	0.469	0.4285	0.633	0.529	0.538	0.4875	0.487	0.4755	0.5125	0.4775	0.376	0.4055	0.3875	0.493	0.4465	0.3735	0.4055	0.352	0.3605	0.44	0.417	0.5065	0.6485	0.481	0.4665	0.538	0.4695	0.4505	0.428	0.4	0.396	0.3525	0.3915	0.472	0.393	0.429
10	0.4495	0.4465	0.3915	0.603	0.484	0.502	0.4455	0.455	0.457	0.4695	0.443	0.36	0.378	0.3565	0.466	0.409	0.339	0.3785	0.329	0.338	0.4055	0.382	0.4665	0.5975	0.4515	0.438	0.5125	0.433	0.423	0.39	0.3665	0.375	0.3295	0.366	0.448	0.37	0.4005
10.25	0.4225	0.4205	0.3595	0.563	0.4495	0.458	0.411	0.415	0.4175	0.437	0.4085	0.338	0.354	0.328	0.4395	0.3765	0.3195	0.3475	0.3045	0.313	0.39	0.353	0.422	0.5525	0.423	0.4155	0.4635	0.393	0.39	0.35	0.339	0.3425	0.317	0.3545	0.4285	0.351	0.374
10.5	0.395	0.384	0.3405	0.512	0.4095	0.423	0.385	0.3815	0.392	0.4105	0.3795	0.3215	0.3245	0.3065	0.409	0.354	0.303	0.32	0.284	0.286	0.369	0.3255	0.3875	0.5195	0.3855	0.3905	0.439	0.365	0.371	0.331	0.3095	0.2975	0.3025	0.339	0.4	0.324	0.3475
10.75	0.3645	0.355	0.3205	0.478	0.393	0.395	0.3705	0.367	0.3715	0.377	0.3605	0.304	0.312	0.2925	0.374	0.339	0.281	0.304	0.26	0.2745	0.3485	0.3035	0.3625	0.4705	0.366	0.366	0.3985	0.3485	0.346	0.313	0.2925	0.283	0.2785	0.3055	0.3765	0.309	0.322
11	0.352	0.3525	0.3	0.4485	0.374	0.3745	0.3475	0.327	0.343	0.3555	0.333	0.2955	0.2945	0.2735	0.3535	0.328	0.2565	0.2865	0.2405	0.262	0.3215	0.2895	0.341	0.4165	0.344	0.3495	0.3655	0.3255	0.3235	0.293	0.276	0.274	0.26	0.285	0.367	0.2895	0.299
11.25	0.3345	0.3425	0.286	0.428	0.356	0.3475	0.316	0.3015	0.324	0.3305	0.313	0.2635	0.2765	0.257	0.3305	0.309	0.2465	0.267	0.231	0.2395	0.302	0.273	0.328	0.391	0.3255	0.3255	0.3375	0.3085	0.2985	0.266	0.262	0.2525	0.2485	0.262	0.3385	0.265	0.271
11.5	0.3195	0.3295	0.276	0.408	0.3315	0.339	0.296	0.2855	0.3125	0.306	0.2965	0.239	0.265	0.245	0.315	0.291	0.2365	0.2455	0.2175	0.2325	0.2935	0.2565	0.307	0.355	0.307	0.3195	0.325	0.2845	0.2745	0.2475	0.2505	0.24	0.2365	0.249	0.32	0.2535	0.2545
11.75	0.2975	0.311	0.2615	0.389	0.314	0.316	0.29	0.273	0.3025	0.294	0.277	0.2325	0.2445	0.231	0.3095	0.273	0.218	0.2385	0.203	0.22	0.274	0.2455	0.2805	0.3435	0.2975	0.302	0.3	0.2785	0.2685	0.237	0.237	0.233	0.222	0.232	0.2975	0.2375	0.2435
12	0.2835	0.293	0.247	0.3625	0.302	0.298	0.2715	0.2625	0.2835	0.2725	0.265	0.219	0.223	0.2295	0.285	0.262	0.2075	0.226	0.1915	0.207	0.2575	0.237	0.273	0.326	0.2855	0.276	0.2705	0.2635	0.2535	0.2255	0.222	0.2155	0.211	0.215	0.288	0.2255	0.2335
12.25	0.2695	0.2845	0.24	0.3335	0.286	0.285	0.252	0.2485	0.263	0.248	0.26	0.2085	0.211	0.219	0.264	0.255	0.1975	0.2145	0.1795	0.199	0.243	0.2255	0.2575	0.3055	0.273	0.26	0.249	0.246	0.2275	0.215	0.2075	0.202	0.2035	0.202	0.276	0.22	0.223
12.5	0.257	0.2635	0.238	0.3125	0.2675	0.266	0.2365	0.238	0.248	0.2275	0.243	0.201	0.203	0.2085	0.252	0.2465	0.188	0.1975	0.172	0.1875	0.235	0.217	0.24	0.2895	0.26	0.253	0.244	0.235	0.222	0.205	0.206	0.1905	0.1945	0.192	0.253	0.2025	0.2115
12.75	0.2435	0.245	0.2315	0.2895	0.251	0.2605	0.2265	0.2255	0.2415	0.2175	0.2315	0.1985	0.196	0.199	0.242	0.238	0.181	0.191	0.1625	0.1845	0.23	0.208	0.2265	0.27	0.2495	0.2405	0.2295	0.2265	0.207	0.1955	0.1955	0.1845	0.185	0.1795	0.236	0.195	0.207
13	0.236	0.2345	0.216	0.2695	0.2455	0.2445	0.216	0.212	0.2295	0.2105	0.221	0.194	0.189	0.1905	0.2325	0.2325	0.1735	0.1795	0.156	0.1755	0.221	0.193	0.214	0.262	0.2415	0.23	0.217	0.217	0.202	0.191	0.1865	0.174	0.1775	0.1675	0.2285	0.187	0.1965
13.25	0.2315	0.22	0.207	0.258	0.2335	0.234	0.208	0.2065	0.2175	0.205	0.208	0.177	0.1815	0.1895	0.224	0.214	0.164	0.175	0.1535	0.166	0.2115	0.1885	0.2035	0.251	0.231	0.208	0.2065	0.2085	0.1925	0.1775	0.1815	0.1605	0.1725	0.1625	0.215	0.178	0.1855
13.5	0.224	0.211	0.1985	0.244	0.2265	0.221	0.205	0.1965	0.213	0.199	0.2055	0.171	0.1765	0.1885	0.2155	0.2105	0.1585	0.171	0.147	0.165	0.1995	0.181	0.1955	0.234	0.222	0.205	0.196	0.1985	0.1855	0.172	0.178	0.155	0.171	0.158	0.204	0.173	0.1775
13.75	0.217	0.204	0.188	0.2325	0.2235	0.219	0.1915	0.187	0.2025	0.192	0.1915	0.1655	0.17	0.179	0.202	0.203	0.153	0.164	0.143	0.1615	0.1895	0.1745	0.188	0.226	0.217	0.195	0.1905	0.19	0.178	0.1635	0.1675	0.151	0.164	0.1545	0.2	0.169	0.174
14	0.2105	0.1945	0.182	0.223	0.214	0.2075	0.182	0.1825	0.1985	0.1815	0.1835	0.162	0.169	0.1705	0.1965	0.197	0.1495	0.157	0.1365	0.1585	0.186	0.1735	0.184	0.215	0.2095	0.1955	0.1825	0.1885	0.1715	0.161	0.158	0.147	0.159	0.144	0.1935	0.163	0.1665
14.25	0.197	0.1885	0.178	0.2185	0.203	0.1965	0.1755	0.174	0.19	0.173	0.1805	0.1565	0.165	0.16	0.187	0.191	0.145	0.151	0.132	0.1555	0.178	0.1665	0.1765	0.207	0.201	0.1915	0.1725	0.1805	0.165	0.155	0.155	0.143	0.1525	0.1385	0.1815	0.1535	0.163
14.5	0.189	0.1795	0.175	0.2035	0.194	0.1975	0.172	0.1695	0.1855	0.1665	0.178	0.15	0.1585	0.1585	0.1885	0.1895	0.1365	0.144	0.13	0.15	0.167	0.1635	0.169	0.1985	0.1955	0.1815	0.1625	0.1755	0.1615	0.147	0.152	0.14	0.1455	0.1375	0.178	0.149	0.1605
14.75	0.1875	0.1705	0.169	0.199	0.191	0.1875	0.1665	0.1665	0.1815	0.1625	0.173	0.143	0.158	0.157	0.182	0.1885	0.1345	0.145	0.128	0.146	0.16	0.1605	0.164	0.1885	0.188	0.175	0.1635	0.1695	0.1585	0.145	0.146	0.1375	0.1445	0.132	0.176	0.145	0.159
15	0.1815	0.167	0.1665	0.1915	0.179	0.1815	0.164	0.1615	0.175	0.1575	0.1705	0.1365	0.154	0.1535	0.1735	0.179	0.133	0.145	0.1225	0.14	0.1575	0.16	0.159	0.1815	0.1835	0.178	0.161	0.162	0.1485	0.141	0.139	0.1325	0.142	0.1345	0.1675	0.14	0.1535
15.25	0.1765	0.163	0.159	0.188	0.172	0.1735	0.157	0.1535	0.167	0.1515	0.163	0.1345	0.1475	0.148	0.171	0.174	0.125	0.1355	0.1155	0.138	0.155	0.151	0.1495	0.1785	0.181	0.1685	0.155	0.1565	0.148	0.139	0.1345	0.1305	0.135	0.1265	0.1605	0.1335	0.1485
15.5	0.1735	0.159	0.155	0.1855	0.1675	0.1675	0.148	0.148	0.1625	0.1485	0.1565	0.1305	0.1435	0.143	0.172	0.171	0.1245	0.134	0.113	0.135	0.149	0.1445	0.1505	0.179	0.1735	0.165	0.153	0.152	0.145	0.137	0.1355	0.1245	0.1285	0.1205	0.161	0.1295	0.1435
15.75	0.1675	0.1575	0.1455	0.1775	0.162	0.161	0.147	0.1475	0.1605	0.1445	0.151	0.1305	0.1415	0.143	0.1645	0.1705	0.12	0.1335	0.1095	0.1285	0.1465	0.14	0.1445	0.1645	0.1695	0.16	0.1555	0.1485	0.139	0.131	0.133	0.121	0.125	0.1145	0.1565	0.129	0.1415
16	0.1595	0.153	0.1495	0.1735	0.1545	0.1525	0.1485	0.1465	0.156	0.138	0.151	0.1365	0.1385	0.141	0.169	0.1685	0.1185	0.1295	0.106	0.1235	0.1455	0.138	0.143	0.1595	0.1675	0.153	0.1505	0.1475	0.1405	0.128	0.1275	0.1205	0.123	0.115	0.1525	0.128	0.1405
16.25	0.1575	0.1525	0.145	0.165	0.1525	0.153	0.1415	0.141	0.15	0.1335	0.147	0.1255	0.137	0.1355	0.155	0.16	0.117	0.1275	0.1055	0.1235	0.137	0.135	0.135	0.1595	0.1645	0.15	0.143	0.1445	0.135	0.1225	0.1245	0.118	0.1215	0.11	0.1495	0.1245	0.138
16.5	0.152	0.143	0.1375	0.157	0.152	0.1475	0.1375	0.1365	0.1495	0.128	0.1425	0.1215	0.131	0.131	0.147	0.1565	0.1145	0.122	0.1025	0.118	0.1315	0.1295	0.1305	0.156	0.1545	0.147	0.1375	0.14	0.13	0.1205	0.1205	0.1155	0.1205	0.1055	0.1445	0.118	0.1285
16.75	0.1525	0.138	0.1355	0.1565	0.148	0.146	0.13	0.1315	0.146	0.125	0.1385	0.1205	0.1335	0.131	0.1475	0.152	0.1115	0.1195	0.101	0.1145	0.129	0.128	0.1285	0.151	0.154	0.1405	0.134	0.136	0.125	0.1195	0.1185	0.1125	0.1165	0.105	0.1395	0.1145	0.1215
17	0.149	0.1355	0.1325	0.156	0.1445	0.142	0.129	0.127	0.136	0.1235	0.1385	0.1175	0.1325	0.1275	0.146	0.1535	0.1065	0.1175	0.099	0.1125	0.1285	0.1255	0.1245	0.1535	0.1535	0.135	0.1335	0.131	0.1265	0.1185	0.1135	0.1095	0.113	0.1035	0.1375	0.1165	0.1225
17.25	0.1455	0.131	0.133	0.1525	0.142	0.143	0.125	0.125	0.1345	0.1205	0.1405	0.1135	0.128	0.1235	0.138	0.1505	0.105	0.114	0.0965	0.111	0.122	0.12	0.1235	0.15	0.15	0.136	0.128	0.1275	0.128	0.1155	0.1085	0.1075	0.108	0.1	0.1345	0.115	0.1185
17.5	0.14	0.13	0.1295	0.146	0.1385	0.1405	0.123	0.124	0.1335	0.1175	0.1315	0.1115	0.121	0.118	0.1355	0.1435	0.103	0.1095	0.095	0.1085	0.121	0.117	0.122	0.1375	0.1465	0.133	0.125	0.1245	0.1215	0.113	0.105	0.1025	0.104	0.0975	0.13	0.1115	0.115
17.75	0.137	0.129	0.13	0.143	0.135	0.135	0.119	0.1215	0.1295	0.1135	0.124	0.11	0.123	0.12	0.133	0.145	0.103	0.11	0.0925	0.1075	0.1195	0.112	0.118	0.1335	0.141	0.128	0.126	0.123	0.119	0.113	0.1065	0.1005	0.1045	0.095	0.1325	0.11	0.113
18	0.1335	0.127	0.1295	0.1405	0.132	0.1335	0.116	0.1195	0.1295	0.1125	0.121	0.1115	0.123	0.119	0.1315	0.145	0.1005	0.1085	0.09	0.105	0.1175	0.11	0.1125	0.1325	0.1395	0.125	0.124	0.1195	0.116	0.116	0.105	0.101	0.1035	0.092	0.1275	0.1065	0.112
18.25	0.134	0.124	0.1245	0.141	0.133	0.1305	0.1125	0.116	0.1245	0.1095	0.1175	0.107	0.118	0.1165	0.1285	0.138	0.098	0.1055	0.087	0.1055	0.1135	0.112	0.1105	0.126	0.135	0.123	0.1175	0.1175	0.1135	0.108	0.0985	0.0995	0.0985	0.0905	0.121	0.1045	0.109
18.5	0.1315	0.1195	0.1195	0.137	0.127	0.126	0.1135	0.113	0.1225	0.106	0.115	0.103	0.116	0.112	0.13	0.137	0.095	0.103	0.0865	0.102	0.1095	0.109	0.1105	0.13	0.1335	0.126	0.115	0.1175	0.1085	0.106	0.099	0.098	0.0965	0.088	0.12	0.1015	0.1045
18.75	0.126	0.117	0.12	0.132	0.1255	0.1225	0.111	0.1115	0.119	0.105	0.117	0.0985	0.1125	0.1085	0.125	0.136	0.0945	0.1	0.0855	0.099	0.109	0.1055	0.1065	0.1235	0.1305	0.124	0.1105	0.1135	0.1075	0.1045	0.0995	0.097	0.0945	0.086	0.1205	0.1	0.1005
19	0.125	0.1145	0.1155	0.1305	0.121	0.1235	0.109	0.1115	0.1165	0.1045	0.1155	0.102	0.1185	0.108	0.1265	0.1365	0.0945	0.0985	0.087	0.1005	0.1095	0.1025	0.105	0.123	0.126	0.123	0.1095	0.109	0.1075	0.1055	0.096	0.095	0.0915	0.0865	0.1195	0.0975	0.0985
19.25	0.1245	0.108	0.1115	0.129	0.1195	0.1225	0.107	0.108	0.1135	0.1005	0.112	0.0965	0.1145	0.1075	0.123	0.134	0.0925	0.0975	0.0845	0.098	0.107	0.102	0.103	0.1175	0.1235	0.115	0.1085	0.107	0.1055	0.103	0.094	0.0925	0.091	0.0855	0.113	0.096	0.0975
19.5	0.12	0.1075	0.1105	0.1275	0.118	0.121	0.105	0.1035	0.1125	0.1	0.1125	0.095	0.1095	0.106	0.118	0.129	0.0875	0.0945	0.0815	0.0955	0.101	0.1005	0.1	0.1175	0.1235	0.113	0.1055	0.104	0.105	0.102	0.0905	0.092	0.0915	0.0795	0.113	0.095	0.0985
19.75	0.1185	0.1095	0.1095	0.1255	0.1145	0.117	0.101	0.1035	0.111	0.097	0.1105	0.0945	0.106	0.1015	0.1165	0.1255	0.0875	0.092	0.081	0.0955	0.1	0.097	0.098	0.1165	0.123	0.1105	0.106	0.103	0.105	0.1025	0.0875	0.09	0.091	0.0795	0.1145	0.092	0.0955
20	0.1165	0.107	0.1055	0.122	0.1115	0.115	0.1005	0.102	0.109	0.097	0.108	0.092	0.106	0.1005	0.118	0.126	0.084	0.091	0.0815	0.0945	0.098	0.0965	0.0965	0.113	0.1175	0.109	0.105	0.104	0.1055	0.0995	0.087	0.092	0.088	0.0795	0.1115	0.0925	0.09
20.25	0.114	0.103	0.105	0.1235	0.1095	0.1135	0.0995	0.1	0.107	0.0955	0.1065	0.0885	0.11	0.0975	0.117	0.125	0.084	0.091	0.0795	0.095	0.096	0.097	0.0985	0.1095	0.117	0.1085	0.0975	0.1005	0.1015	0.099	0.086	0.0905	0.0865	0.077	0.107	0.0905	0.0875
20.5	0.112	0.102	0.102	0.1165	0.112	0.1095	0.1005	0.099	0.105	0.096	0.105	0.0885	0.112	0.0975	0.1145	0.123	0.083	0.0865	0.0785	0.095	0.0965	0.095	0.095	0.1105	0.115	0.106	0.101	0.096	0.099	0.0965	0.086	0.0895	0.085	0.0755	0.1055	0.09	0.089
20.75	0.111	0.099	0.1015	0.113	0.1095	0.109	0.096	0.0955	0.1045	0.0925	0.1025	0.0875	0.1085	0.0965	0.1135	0.123	0.083	0.087	0.077	0.0925	0.0985	0.0915	0.092	0.1115	0.116	0.103	0.099	0.094	0.0985	0.0975	0.083	0.0875	0.0835	0.076	0.106	0.0895	0.091
21	0.1075	0.1015	0.0995	0.1135	0.1035	0.107	0.0945	0.0925	0.1035	0.0915	0.0985	0.0885	0.103	0.0955	0.1115	0.119	0.0835	0.085	0.078	0.09	0.0945	0.0885	0.0915	0.107	0.1145	0.105	0.0965	0.092	0.1	0.0965	0.0805	0.087	0.0815	0.0735	0.104	0.0875	0.0895
21.25	0.1075	0.099	0.0985	0.116	0.1035	0.106	0.0945	0.092	0.0995	0.091	0.098	0.084	0.103	0.0945	0.11	0.1145	0.081	0.083	0.079	0.09	0.094	0.0885	0.0915	0.1075	0.113	0.1015	0.097	0.0885	0.1	0.095	0.081	0.0845	0.0825	0.0705	0.0995	0.085	0.0855
21.5	0.1055	0.0955	0.099	0.114	0.0995	0.1025	0.094	0.0905	0.099	0.089	0.1	0.0845	0.103	0.0915	0.1085	0.115	0.0795	0.082	0.075	0.0885	0.0905	0.086	0.0895	0.1045	0.109	0.098	0.0975	0.0875	0.094	0.093	0.0795	0.085	0.082	0.0685	0.097	0.083	0.0835
21.75	0.102	0.0945	0.096	0.1095	0.097	0.1	0.093	0.088	0.0985	0.088	0.0975	0.0815	0.1005	0.0905	0.1075	0.1165	0.08	0.083	0.0745	0.0845	0.089	0.0865	0.0885	0.101	0.106	0.097	0.095	0.0885	0.092	0.093	0.0785	0.083	0.0795	0.069	0.096	0.0815	0.082
22	0.1025	0.094	0.0945	0.109	0.095	0.1	0.0925	0.089	0.097	0.0895	0.096	0.0805	0.0965	0.0875	0.1105	0.112	0.0785	0.0805	0.074	0.086	0.09	0.0845	0.0885	0.0985	0.105	0.097	0.0935	0.086	0.091	0.0915	0.0755	0.0835	0.08	0.069	0.096	0.0815	0.081
22.25	0.1005	0.092	0.092	0.1085	0.0935	0.0975	0.09	0.089	0.0965	0.089	0.095	0.0785	0.0965	0.089	0.1065	0.1115	0.0765	0.078	0.074	0.086	0.088	0.0825	0.086	0.096	0.1045	0.097	0.092	0.085	0.09	0.0895	0.0745	0.0825	0.0765	0.068	0.096	0.0795	0.0815
22.5	0.0995	0.092	0.0915	0.1075	0.093	0.0965	0.0875	0.0855	0.095	0.087	0.094	0.077	0.0945	0.0885	0.105	0.109	0.077	0.076	0.0725	0.087	0.0875	0.082	0.0875	0.096	0.105	0.097	0.091	0.0855	0.0905	0.09	0.0755	0.0805	0.074	0.0665	0.099	0.078	0.081
22.75	0.0975	0.09	0.0925	0.105	0.092	0.0945	0.085	0.0835	0.091	0.0865	0.0895	0.075	0.0945	0.088	0.1045	0.1075	0.0775	0.075	0.072	0.0845	0.085	0.0815	0.084	0.0955	0.103	0.091	0.092	0.0845	0.087	0.09	0.0725	0.08	0.0745	0.065	0.0935	0.078	0.079
23	0.0955	0.091	0.088	0.104	0.091	0.0925	0.085	0.081	0.09	0.088	0.089	0.0735	0.0935	0.0855	0.103	0.1055	0.0745	0.074	0.0705	0.083	0.084	0.0785	0.082	0.095	0.1025	0.0905	0.089	0.08	0.085	0.0905	0.0735	0.08	0.075	0.0645	0.0895	0.0775	0.0765
23.25	0.0955	0.091	0.0865	0.1055	0.091	0.093	0.084	0.079	0.089	0.0865	0.09	0.0745	0.0945	0.085	0.102	0.1055	0.0745	0.074	0.069	0.082	0.083	0.078	0.081	0.095	0.1015	0.0875	0.0885	0.081	0.084	0.088	0.074	0.078	0.074	0.065	0.0895	0.0755	0.077
23.5	0.093	0.09	0.087	0.105	0.088	0.092	0.082	0.081	0.0865	0.085	0.0905	0.073	0.0905	0.0835	0.105	0.104	0.0735	0.0715	0.0695	0.081	0.082	0.079	0.0815	0.091	0.1015	0.0885	0.091	0.079	0.083	0.088	0.073	0.0755	0.0725	0.064	0.0885	0.074	0.0765
23.75	0.0915	0.09	0.0845	0.103	0.088	0.0915	0.0805	0.0795	0.086	0.0855	0.0885	0.075	0.089	0.0815	0.101	0.102	0.0725	0.07	0.067	0.0815	0.0805	0.076	0.079	0.092	0.1	0.0885	0.0915	0.0785	0.08	0.0885	0.071	0.077	0.0715	0.062	0.089	0.074	0.074
24	0.089	0.0895	0.085	0.1005	0.0875	0.0885	0.0845	0.0775	0.0865	0.0835	0.0875	0.08	0.0895	0.0815	0.1005	0.108	0.071	0.0685	0.0675	0.081	0.0775	0.0735	0.0775	0.092	0.099	0.087	0.0875	0.077	0.0805	0.092	0.071	0.0765	0.0705	0.061	0.088	0.074	0.076
24.25	0.0875	0.087	0.083	0.0975	0.0855	0.0855	0.08	0.077	0.0835	0.081	0.086	0.071	0.0865	0.0785	0.096	0.101	0.0715	0.067	0.0675	0.079	0.0765	0.073	0.0785	0.0875	0.098	0.0835	0.087	0.0765	0.0795	0.087	0.068	0.075	0.0705	0.061	0.0875	0.072	0.073
24.5	0.087	0.0845	0.0825	0.096	0.0855	0.0835	0.0775	0.0755	0.0825	0.079	0.0865	0.069	0.086	0.078	0.0935	0.099	0.0715	0.0675	0.0645	0.078	0.0775	0.0735	0.0755	0.0865	0.0975	0.0805	0.0845	0.0735	0.08	0.0855	0.067	0.075	0.069	0.0595	0.0855	0.0695	0.0695
24.75	0.088	0.0805	0.0795	0.0945	0.0845	0.0825	0.075	0.0725	0.0815	0.079	0.0825	0.068	0.086	0.0775	0.0935	0.0975	0.07	0.066	0.063	0.078	0.075	0.0725	0.075	0.0895	0.097	0.0795	0.083	0.0715	0.078	0.0835	0.0675	0.075	0.068	0.0595	0.0835	0.069	0.071
25	0.089	0.079	0.0795	0.091	0.082	0.0835	0.074	0.0725	0.0815	0.077	0.082	0.067	0.085	0.076	0.0915	0.096	0.0685	0.0635	0.0625	0.077	0.072	0.071	0.0735	0.0875	0.0985	0.076	0.086	0.0685	0.076	0.0825	0.068	0.0745	0.067	0.0585	0.0815	0.068	0.072
25.25	0.0885	0.0765	0.079	0.091	0.0805	0.083	0.0725	0.074	0.081	0.0755	0.082	0.066	0.083	0.076	0.089	0.095	0.07	0.0625	0.061	0.077	0.0725	0.0695	0.072	0.0825	0.0965	0.0745	0.086	0.069	0.074	0.083	0.0655	0.0745	0.0675	0.056	0.0805	0.0675	0.0705
25.5	0.085	0.0755	0.0775	0.088	0.081	0.081	0.0715	0.072	0.08	0.0745	0.0795	0.0655	0.081	0.074	0.0895	0.094	0.0675	0.063	0.061	0.0785	0.0725	0.0685	0.0705	0.0835	0.0975	0.077	0.0815	0.068	0.074	0.0825	0.0635	0.0715	0.0675	0.057	0.077	0.066	0.069
25.75	0.0815	0.073	0.076	0.086	0.081	0.0775	0.0715	0.0705	0.081	0.075	0.0805	0.065	0.082	0.0745	0.0885	0.0935	0.0685	0.0615	0.061	0.0765	0.071	0.0665	0.07	0.085	0.0965	0.074	0.0815	0.068	0.0735	0.085	0.063	0.0725	0.064	0.057	0.0785	0.0645	0.0665
26	0.081	0.072	0.0755	0.084	0.0785	0.077	0.071	0.068	0.0795	0.0715	0.0775	0.066	0.0835	0.076	0.0885	0.0935	0.0695	0.062	0.061	0.0755	0.0695	0.067	0.068	0.0865	0.0945	0.0735	0.081	0.0675	0.072	0.088	0.062	0.0725	0.0645	0.055	0.073	0.0635	0.0655
26.25	0.083	0.074	0.0735	0.085	0.077	0.0755	0.0705	0.066	0.0765	0.071	0.0775	0.0635	0.0805	0.0745	0.0865	0.0925	0.069	0.061	0.0605	0.0745	0.069	0.066	0.0675	0.083	0.092	0.0745	0.08	0.066	0.07	0.0825	0.0625	0.0695	0.062	0.054	0.074	0.064	0.068
26.5	0.082	0.0715	0.074	0.084	0.0755	0.076	0.0695	0.0685	0.075	0.071	0.0785	0.063	0.081	0.0725	0.086	0.0925	0.067	0.0595	0.0595	0.0735	0.0695	0.067	0.0675	0.0815	0.0935	0.073	0.077	0.0645	0.0695	0.081	0.0625	0.069	0.061	0.052	0.075	0.064	0.0675
26.75	0.081	0.071	0.0735	0.079	0.0735	0.0755	0.069	0.068	0.0725	0.0705	0.078	0.062	0.0845	0.0735	0.0875	0.0905	0.067	0.06	0.0575	0.0715	0.07	0.0665	0.067	0.0835	0.0925	0.0725	0.0785	0.0635	0.0695	0.0785	0.061	0.0675	0.061	0.053	0.075	0.063	0.065
27	0.081	0.07	0.071	0.0805	0.074	0.075	0.0675	0.067	0.0735	0.07	0.079	0.0625	0.0805	0.072	0.0875	0.09	0.0665	0.0605	0.058	0.0715	0.068	0.0655	0.067	0.083	0.09	0.072	0.0775	0.062	0.068	0.081	0.06	0.067	0.061	0.054	0.0735	0.0625	0.067
27.25	0.0785	0.0685	0.071	0.081	0.075	0.0745	0.068	0.066	0.072	0.069	0.0765	0.0615	0.0775	0.0705	0.0845	0.089	0.0665	0.06	0.057	0.072	0.0675	0.065	0.0675	0.079	0.093	0.0695	0.0785	0.062	0.0665	0.0795	0.0585	0.0675	0.0605	0.0515	0.0715	0.062	0.0655
27.5	0.0775	0.0695	0.072	0.082	0.073	0.0745	0.068	0.066	0.071	0.0695	0.074	0.0595	0.0775	0.0705	0.0825	0.086	0.0665	0.0585	0.0555	0.0715	0.067	0.063	0.0675	0.08	0.092	0.07	0.0795	0.0615	0.0665	0.079	0.0575	0.0655	0.0605	0.049	0.0715	0.06	0.066
27.75	0.076	0.0685	0.068	0.0825	0.0725	0.0735	0.0665	0.068	0.0705	0.0685	0.074	0.059	0.0755	0.07	0.083	0.0845	0.0655	0.0575	0.057	0.072	0.066	0.064	0.0635	0.081	0.0905	0.071	0.077	0.06	0.066	0.079	0.057	0.066	0.0595	0.0495	0.0695	0.0585	0.065
28	0.076	0.0685	0.0685	0.079	0.0715	0.072	0.0665	0.0665	0.069	0.07	0.073	0.059	0.0745	0.071	0.082	0.0845	0.0645	0.056	0.0575	0.0685	0.066	0.0615	0.0635	0.0785	0.0895	0.0695	0.0755	0.06	0.066	0.0785	0.059	0.0645	0.06	0.05	0.07	0.059	0.0625
28.25	0.075	0.0685	0.0675	0.0775	0.0705	0.071	0.0655	0.063	0.0675	0.068	0.073	0.0575	0.075	0.0705	0.081	0.085	0.0645	0.055	0.056	0.068	0.0645	0.0615	0.064	0.078	0.0915	0.066	0.0745	0.0575	0.066	0.079	0.057	0.0635	0.059	0.051	0.0685	0.058	0.062
28.5	0.076	0.065	0.0665	0.0755	0.0695	0.071	0.0645	0.0625	0.0675	0.0675	0.072	0.057	0.0815	0.068	0.0815	0.0855	0.0655	0.055	0.055	0.068	0.064	0.061	0.0645	0.076	0.0915	0.0665	0.075	0.0565	0.064	0.0785	0.056	0.063	0.0585	0.0505	0.068	0.055	0.061
28.75	0.076	0.0645	0.0685	0.075	0.0675	0.068	0.064	0.063	0.0675	0.0665	0.0715	0.0565	0.081	0.069	0.081	0.0865	0.0645	0.0545	0.055	0.0695	0.0645	0.061	0.0645	0.0755	0.09	0.0685	0.072	0.0575	0.063	0.0755	0.056	0.0635	0.0565	0.0505	0.0695	0.0555	0.061
29	0.0735	0.0645	0.0665	0.0765	0.069	0.07	0.065	0.061	0.0665	0.067	0.07	0.058	0.0775	0.0685	0.0795	0.0845	0.064	0.0545	0.054	0.0685	0.064	0.06	0.0655	0.0755	0.0905	0.067	0.072	0.056	0.0625	0.0765	0.054	0.0625	0.0535	0.049	0.068	0.0545	0.061
29.25	0.0735	0.064	0.067	0.076	0.067	0.0685	0.064	0.06	0.067	0.0655	0.0705	0.057	0.075	0.068	0.0775	0.083	0.063	0.0535	0.055	0.0675	0.0645	0.059	0.064	0.0745	0.0895	0.0655	0.0735	0.056	0.0625	0.076	0.054	0.0615	0.0555	0.049	0.0665	0.055	0.061
29.5	0.073	0.0645	0.065	0.0745	0.069	0.0665	0.063	0.06	0.066	0.065	0.0695	0.0545	0.0715	0.067	0.076	0.0835	0.063	0.052	0.056	0.0685	0.0635	0.0585	0.063	0.074	0.09	0.0655	0.072	0.0555	0.061	0.0755	0.054	0.062	0.0565	0.0485	0.0655	0.0555	0.061
29.75	0.071	0.064	0.065	0.0755	0.0685	0.067	0.0625	0.0595	0.0665	0.0655	0.066	0.0545	0.072	0.066	0.0745	0.0845	0.0635	0.0525	0.0535	0.0675	0.062	0.0575	0.062	0.0725	0.0885	0.0665	0.0745	0.0545	0.06	0.0755	0.053	0.0625	0.0555	0.047	0.066	0.054	0.061
30	0.0725	0.064	0.065	0.073	0.0675	0.066	0.064	0.059	0.065	0.064	0.0665	0.055	0.071	0.0655	0.077	0.083	0.062	0.0515	0.053	0.0665	0.063	0.0575	0.063	0.074	0.0885	0.065	0.072	0.054	0.0585	0.077	0.0525	0.061	0.0545	0.0465	0.0645	0.0535	0.059
30.25	0.072	0.0625	0.064	0.0725	0.0655	0.0655	0.062	0.06	0.0635	0.064	0.0665	0.054	0.069	0.0645	0.073	0.08	0.062	0.0515	0.0515	0.067	0.063	0.058	0.0635	0.0725	0.089	0.0635	0.0705	0.055	0.057	0.075	0.05	0.0605	0.0545	0.0465	0.064	0.0525	0.058
30.5	0.0695	0.062	0.064	0.0735	0.0655	0.0655	0.0625	0.058	0.0645	0.0645	0.0665	0.0535	0.069	0.0635	0.0715	0.08	0.0625	0.051	0.052	0.064	0.0615	0.057	0.063	0.0715	0.09	0.0625	0.07	0.054	0.058	0.074	0.05	0.06	0.0535	0.045	0.0635	0.052	0.059
30.75	0.0695	0.0605	0.0645	0.0705	0.0665	0.0645	0.0615	0.0565	0.0625	0.064	0.0645	0.0535	0.07	0.0635	0.0745	0.0795	0.0615	0.0495	0.052	0.0635	0.062	0.0555	0.0615	0.0705	0.088	0.0615	0.0705	0.0525	0.0575	0.0755	0.049	0.06	0.052	0.0445	0.062	0.051	0.057
31	0.0695	0.0635	0.0645	0.0715	0.0645	0.063	0.0615	0.0565	0.062	0.0635	0.067	0.053	0.0685	0.0635	0.073	0.081	0.061	0.049	0.052	0.064	0.0605	0.055	0.0615	0.072	0.086	0.0655	0.068	0.0525	0.057	0.0775	0.0485	0.059	0.0535	0.045	0.063	0.0505	0.057
31.25	0.07	0.0625	0.0635	0.0695	0.063	0.064	0.0615	0.057	0.0625	0.062	0.0645	0.0525	0.066	0.0625	0.071	0.0795	0.0615	0.0495	0.0515	0.0635	0.0615	0.054	0.061	0.0695	0.086	0.063	0.0685	0.051	0.056	0.0745	0.0495	0.0575	0.0525	0.045	0.06	0.0495	0.0575
31.5	0.0695	0.0605	0.063	0.069	0.0645	0.0645	0.0605	0.0585	0.063	0.062	0.0645	0.052	0.0645	0.0615	0.0715	0.0785	0.06	0.05	0.0505	0.0625	0.06	0.0535	0.0605	0.0705	0.087	0.061	0.0675	0.0505	0.056	0.0735	0.049	0.057	0.0515	0.0435	0.0595	0.0495	0.0585
31.75	0.069	0.062	0.0635	0.0695	0.064	0.063	0.0615	0.057	0.061	0.0645	0.062	0.054	0.0675	0.0625	0.072	0.081	0.0605	0.049	0.0505	0.0625	0.0605	0.0545	0.062	0.072	0.088	0.0625	0.067	0.05	0.056	0.0735	0.048	0.057	0.0515	0.0435	0.0595	0.049	0.058
32	0.0705	0.061	0.064	0.068	0.062	0.0635	0.062	0.0585	0.0605	0.0625	0.0635	0.0655	0.0715	0.0635	0.084	0.091	0.06	0.0495	0.05	0.063	0.061	0.0535	0.0605	0.071	0.088	0.0625	0.0685	0.051	0.056	0.0785	0.049	0.0585	0.0505	0.0445	0.0605	0.0495	0.057
32.25	0.0705	0.0605	0.0615	0.0695	0.0615	0.063	0.0605	0.056	0.06	0.0605	0.062	0.0545	0.069	0.06	0.072	0.076	0.0595	0.0475	0.05	0.0625	0.06	0.053	0.059	0.067	0.087	0.0615	0.0665	0.049	0.053	0.0735	0.0475	0.057	0.051	0.044	0.061	0.0475	0.0565
32.5	0.0685	0.061	0.061	0.068	0.0625	0.0625	0.062	0.056	0.06	0.061	0.062	0.0515	0.0655	0.0605	0.068	0.075	0.06	0.047	0.0485	0.0615	0.059	0.053	0.0595	0.0675	0.087	0.061	0.065	0.05	0.054	0.07	0.0455	0.056	0.0505	0.0435	0.059	0.046	0.055
32.75	0.0665	0.061	0.06	0.068	0.0615	0.063	0.0605	0.057	0.0575	0.0615	0.0605	0.0505	0.0635	0.061	0.0665	0.0755	0.0595	0.0475	0.048	0.0625	0.0575	0.053	0.0595	0.068	0.0865	0.061	0.066	0.05	0.0545	0.0705	0.0465	0.054	0.05	0.0435	0.058	0.046	0.0545
33	0.0675	0.0605	0.0595	0.069	0.06	0.0615	0.059	0.056	0.06	0.0615	0.0595	0.0495	0.065	0.06	0.066	0.077	0.0585	0.0475	0.0485	0.0615	0.057	0.0525	0.059	0.067	0.0845	0.0595	0.0655	0.05	0.0545	0.07	0.0465	0.0545	0.0485	0.043	0.0585	0.046	0.055
33.25	0.0675	0.061	0.0605	0.0675	0.0595	0.06	0.058	0.056	0.0615	0.0605	0.0585	0.049	0.0645	0.0585	0.067	0.0775	0.058	0.0465	0.048	0.06	0.057	0.0515	0.0585	0.0625	0.088	0.059	0.0635	0.0485	0.0525	0.068	0.044	0.0545	0.0495	0.0415	0.058	0.045	0.0545
33.5	0.0665	0.0615	0.06	0.0675	0.06	0.061	0.06	0.0535	0.0575	0.0605	0.0585	0.049	0.0635	0.058	0.0665	0.0745	0.0575	0.0455	0.0485	0.059	0.0575	0.051	0.058	0.0655	0.088	0.059	0.0665	0.0485	0.051	0.0695	0.0445	0.054	0.0485	0.0415	0.0555	0.045	0.054
33.75	0.0665	0.062	0.058	0.0655	0.0585	0.06	0.0595	0.0545	0.0575	0.061	0.057	0.05	0.06	0.0565	0.0655	0.0725	0.057	0.045	0.047	0.061	0.057	0.051	0.057	0.065	0.0855	0.06	0.0665	0.0475	0.0515	0.071	0.044	0.0535	0.0475	0.041	0.0545	0.045	0.0525
34	0.0655	0.061	0.0565	0.0645	0.06	0.0595	0.058	0.0535	0.057	0.059	0.0565	0.0505	0.061	0.0585	0.0655	0.073	0.058	0.045	0.045	0.06	0.0575	0.0515	0.058	0.0615	0.0845	0.06	0.0645	0.048	0.052	0.0745	0.0425	0.054	0.048	0.0415	0.057	0.0445	0.0535
34.25	0.063	0.061	0.058	0.065	0.0595	0.059	0.058	0.0545	0.0555	0.0585	0.057	0.048	0.061	0.058	0.0675	0.0745	0.0575	0.045	0.0465	0.0595	0.0565	0.051	0.0575	0.0615	0.084	0.0575	0.061	0.0475	0.052	0.0695	0.0415	0.055	0.0475	0.042	0.057	0.043	0.0535
34.5	0.0645	0.0605	0.057	0.065	0.0575	0.0605	0.0575	0.054	0.055	0.0575	0.056	0.0475	0.061	0.0565	0.065	0.0715	0.0565	0.045	0.0465	0.0595	0.056	0.0505	0.057	0.062	0.0855	0.0575	0.0615	0.047	0.05	0.0685	0.0425	0.0535	0.0475	0.0405	0.0545	0.044	0.053
34.75	0.0655	0.062	0.0585	0.067	0.058	0.06	0.0575	0.0555	0.0545	0.058	0.0545	0.0475	0.06	0.056	0.066	0.073	0.0555	0.044	0.046	0.0585	0.0555	0.0505	0.0565	0.0615	0.084	0.0575	0.063	0.0455	0.0495	0.068	0.042	0.053	0.0485	0.0395	0.054	0.0425	0.052
35	0.064	0.062	0.058	0.066	0.0585	0.059	0.0585	0.055	0.054	0.0585	0.054	0.047	0.0605	0.055	0.064	0.0735	0.0565	0.0435	0.0455	0.058	0.054	0.0495	0.056	0.0625	0.084	0.058	0.063	0.0455	0.049	0.0665	0.041	0.052	0.047	0.039	0.054	0.0415	0.0515
35.25	0.0645	0.06	0.0565	0.066	0.058	0.0585	0.0575	0.054	0.0545	0.059	0.0545	0.0475	0.061	0.0545	0.0635	0.0735	0.0555	0.043	0.046	0.0585	0.0535	0.05	0.0565	0.062	0.0855	0.059	0.0595	0.046	0.0485	0.066	0.041	0.0525	0.0465	0.0385	0.0535	0.042	0.051
35.5	0.0625	0.06	0.0575	0.0665	0.0585	0.0585	0.0555	0.0535	0.0535	0.06	0.0545	0.0475	0.062	0.054	0.0635	0.0725	0.0555	0.0415	0.0455	0.0575	0.053	0.0505	0.0565	0.0595	0.085	0.058	0.062	0.046	0.0485	0.067	0.0415	0.053	0.0465	0.0385	0.054	0.0415	0.049
35.75	0.0615	0.0605	0.055	0.065	0.057	0.0575	0.055	0.053	0.054	0.0585	0.0535	0.047	0.0635	0.054	0.064	0.073	0.056	0.0415	0.0445	0.058	0.054	0.0485	0.056	0.0595	0.0855	0.0565	0.063	0.045	0.048	0.068	0.041	0.053	0.0455	0.039	0.0535	0.0415	0.05
36	0.063	0.061	0.055	0.0655	0.055	0.0575	0.056	0.0515	0.0535	0.0585	0.0535	0.047	0.059	0.0535	0.063	0.073	0.0545	0.0425	0.0445	0.058	0.054	0.0485	0.0555	0.058	0.0855	0.0565	0.06	0.044	0.048	0.0685	0.041	0.052	0.046	0.038	0.0525	0.041	0.051
36.25	0.0625	0.0605	0.0545	0.065	0.0545	0.0565	0.055	0.0515	0.053	0.059	0.053	0.047	0.059	0.053	0.0595	0.0715	0.0545	0.042	0.0445	0.058	0.053	0.049	0.0555	0.0575	0.0865	0.0565	0.06	0.0435	0.048	0.0675	0.039	0.053	0.0455	0.0385	0.0525	0.04	0.05
36.5	0.061	0.0605	0.0555	0.0635	0.055	0.057	0.055	0.052	0.053	0.0585	0.0535	0.045	0.0585	0.052	0.061	0.07	0.0555	0.0415	0.045	0.0575	0.0525	0.049	0.054	0.0565	0.087	0.055	0.0595	0.043	0.0465	0.066	0.039	0.051	0.045	0.037	0.0525	0.04	0.049
36.75	0.0595	0.0595	0.054	0.0645	0.055	0.0575	0.055	0.0515	0.052	0.0565	0.054	0.046	0.0585	0.051	0.0605	0.0695	0.055	0.0405	0.0445	0.0575	0.053	0.048	0.0555	0.056	0.0855	0.0565	0.0605	0.0415	0.046	0.066	0.0395	0.051	0.044	0.037	0.052	0.039	0.049
37	0.0595	0.0595	0.055	0.064	0.0545	0.0575	0.0555	0.052	0.052	0.054	0.052	0.047	0.058	0.0525	0.059	0.071	0.0545	0.04	0.0435	0.058	0.051	0.048	0.0535	0.0545	0.0865	0.055	0.0605	0.0425	0.045	0.0685	0.0395	0.05	0.044	0.037	0.0515	0.0395	0.049
37.25	0.0605	0.059	0.0555	0.0625	0.0535	0.057	0.0555	0.051	0.0535	0.0545	0.051	0.046	0.0575	0.0505	0.06	0.069	0.053	0.0405	0.043	0.0565	0.0525	0.0485	0.054	0.057	0.086	0.056	0.06	0.043	0.045	0.067	0.0385	0.051	0.043	0.0365	0.051	0.038	0.048
37.5	0.06	0.059	0.054	0.0615	0.054	0.057	0.0545	0.051	0.05	0.0565	0.051	0.044	0.0575	0.0485	0.0595	0.0685	0.054	0.0405	0.0425	0.056	0.052	0.0475	0.054	0.058	0.0855	0.056	0.057	0.0425	0.044	0.0645	0.037	0.05	0.043	0.0365	0.0485	0.0385	0.0475
37.75	0.0605	0.058	0.054	0.061	0.0525	0.0555	0.0545	0.0515	0.0515	0.0565	0.051	0.0455	0.0575	0.05	0.0575	0.069	0.055	0.04	0.0425	0.0565	0.0525	0.0475	0.053	0.057	0.084	0.0535	0.057	0.0415	0.045	0.0655	0.0375	0.05	0.044	0.036	0.0505	0.0385	0.0475
38	0.0615	0.059	0.0535	0.061	0.0535	0.055	0.0545	0.052	0.051	0.057	0.0505	0.045	0.0585	0.0495	0.0595	0.07	0.055	0.039	0.0425	0.057	0.0515	0.048	0.0525	0.053	0.0855	0.0535	0.0565	0.042	0.0455	0.0655	0.038	0.0505	0.044	0.036	0.05	0.038	0.0475
38.25	0.0605	0.0595	0.053	0.061	0.0535	0.055	0.055	0.0515	0.0495	0.0555	0.05	0.045	0.057	0.049	0.0585	0.0685	0.0535	0.04	0.043	0.055	0.0515	0.047	0.052	0.054	0.0865	0.053	0.059	0.041	0.0455	0.064	0.0375	0.049	0.0435	0.0345	0.048	0.038	0.0485
38.5	0.059	0.058	0.054	0.0585	0.0525	0.054	0.0545	0.0505	0.0495	0.0545	0.0505	0.044	0.056	0.049	0.0585	0.0675	0.054	0.0395	0.043	0.0535	0.0515	0.047	0.0525	0.0535	0.0855	0.053	0.059	0.0405	0.045	0.0635	0.0365	0.0485	0.043	0.0345	0.048	0.037	0.0475
38.75	0.06	0.0565	0.054	0.0595	0.0525	0.053	0.053	0.0505	0.0505	0.056	0.05	0.044	0.0565	0.0475	0.0585	0.0685	0.054	0.0395	0.042	0.054	0.0505	0.046	0.0525	0.056	0.085	0.0535	0.058	0.0395	0.045	0.0635	0.0365	0.049	0.043	0.036	0.049	0.0365	0.046
39	0.0585	0.0575	0.052	0.059	0.052	0.054	0.0545	0.0505	0.049	0.0545	0.0505	0.044	0.056	0.047	0.0575	0.068	0.054	0.039	0.0415	0.0545	0.0495	0.046	0.0515	0.054	0.086	0.0535	0.057	0.0405	0.0445	0.0655	0.0365	0.05	0.042	0.0355	0.0475	0.0375	0.045
39.25	0.0595	0.0565	0.0525	0.0585	0.052	0.0535	0.0555	0.049	0.0495	0.0555	0.0495	0.0425	0.055	0.0485	0.0555	0.067	0.0535	0.0385	0.0415	0.0535	0.05	0.046	0.051	0.05	0.0845	0.052	0.0575	0.0395	0.0435	0.063	0.0365	0.049	0.042	0.0345	0.047	0.037	0.0445
39.5	0.06	0.0575	0.0535	0.0605	0.052	0.0535	0.0545	0.0515	0.048	0.054	0.0495	0.042	0.055	0.0485	0.055	0.0665	0.0525	0.0395	0.0415	0.053	0.049	0.045	0.0525	0.0505	0.0855	0.051	0.057	0.0395	0.043	0.064	0.0375	0.0485	0.0415	0.0345	0.045	0.037	0.0445
39.75	0.0585	0.0565	0.0535	0.059	0.0515	0.053	0.0535	0.051	0.0475	0.054	0.049	0.043	0.0545	0.0465	0.0565	0.0665	0.0525	0.0385	0.0425	0.053	0.0505	0.045	0.0535	0.051	0.0855	0.052	0.058	0.0405	0.0425	0.063	0.036	0.0485	0.04	0.0345	0.047	0.0365	0.045
40	0.0585	0.0575	0.053	0.059	0.052	0.0535	0.0535	0.0505	0.048	0.054	0.048	0.045	0.0545	0.0465	0.058	0.069	0.053	0.0375	0.042	0.0535	0.05	0.046	0.0515	0.051	0.088	0.0515	0.0575	0.039	0.0425	0.063	0.0355	0.0485	0.04	0.035	0.048	0.0365	0.045
40.25	0.0575	0.057	0.052	0.058	0.052	0.054	0.0535	0.0495	0.047	0.0535	0.049	0.0435	0.0645	0.0465	0.057	0.067	0.053	0.0385	0.0415	0.053	0.0495	0.045	0.0515	0.0525	0.087	0.0505	0.0555	0.0375	0.042	0.0625	0.0355	0.048	0.041	0.0335	0.0455	0.0345	0.045
40.5	0.057	0.0565	0.051	0.0575	0.0515	0.0535	0.054	0.0495	0.047	0.0545	0.047	0.0425	0.0705	0.045	0.058	0.0655	0.0515	0.038	0.0425	0.0535	0.05	0.0445	0.05	0.052	0.085	0.0505	0.054	0.0385	0.0405	0.0615	0.035	0.047	0.041	0.033	0.0455	0.034	0.0445
40.75	0.056	0.0575	0.051	0.059	0.051	0.054	0.054	0.0485	0.048	0.0535	0.046	0.0435	0.057	0.0465	0.057	0.065	0.0515	0.037	0.041	0.0545	0.0495	0.0455	0.0515	0.05	0.0845	0.0515	0.055	0.0395	0.0405	0.061	0.034	0.047	0.041	0.0335	0.0455	0.0335	0.043
41	0.055	0.0565	0.0505	0.0575	0.0495	0.054	0.054	0.048	0.0485	0.054	0.0465	0.043	0.058	0.045	0.056	0.0665	0.052	0.036	0.042	0.0535	0.049	0.044	0.051	0.0525	0.086	0.0515	0.054	0.038	0.041	0.061	0.0335	0.048	0.0405	0.0325	0.045	0.035	0.042
41.25	0.056	0.0575	0.051	0.0575	0.049	0.055	0.054	0.0475	0.0475	0.055	0.0475	0.0425	0.06	0.0445	0.0565	0.066	0.053	0.0355	0.0415	0.053	0.0495	0.043	0.0495	0.0525	0.085	0.052	0.054	0.038	0.0405	0.0615	0.0335	0.048	0.0405	0.033	0.044	0.035	0.0425
41.5	0.0565	0.056	0.0515	0.058	0.0495	0.0545	0.0535	0.0485	0.0465	0.055	0.048	0.042	0.057	0.0445	0.056	0.065	0.0525	0.0355	0.0405	0.0525	0.0485	0.044	0.0505	0.0515	0.085	0.0525	0.053	0.037	0.04	0.0615	0.034	0.0475	0.0405	0.033	0.0435	0.034	0.044
41.75	0.057	0.056	0.0515	0.058	0.05	0.0525	0.053	0.047	0.048	0.055	0.0465	0.052	0.057	0.0475	0.057	0.069	0.052	0.0355	0.0405	0.0515	0.0475	0.0435	0.0505	0.051	0.0825	0.051	0.054	0.038	0.04	0.078	0.034	0.0485	0.0405	0.032	0.044	0.034	0.0425
42	0.0565	0.0565	0.0515	0.0575	0.0495	0.053	0.054	0.0475	0.047	0.0535	0.0455	0.0885	0.0575	0.0595	0.063	0.079	0.0515	0.0355	0.0405	0.052	0.0485	0.0435	0.049	0.05	0.0825	0.049	0.0555	0.0385	0.039	0.152	0.034	0.0555	0.04	0.033	0.043	0.034	0.042
42.25	0.0565	0.057	0.0495	0.0555	0.0485	0.0535	0.0535	0.0475	0.0465	0.0535	0.046	0.0515	0.054	0.046	0.0575	0.0675	0.0515	0.0355	0.0405	0.0535	0.049	0.043	0.0485	0.0515	0.082	0.05	0.0555	0.0375	0.038	0.0805	0.033	0.0505	0.039	0.032	0.043	0.034	0.0405
42.5	0.0545	0.0565	0.049	0.056	0.0485	0.0525	0.0525	0.048	0.0455	0.0545	0.0455	0.0415	0.0545	0.0435	0.0545	0.0645	0.0515	0.0345	0.0405	0.0535	0.049	0.0425	0.049	0.051	0.0825	0.0495	0.0555	0.037	0.0395	0.061	0.032	0.047	0.0385	0.031	0.0425	0.0335	0.04
42.75	0.054	0.0555	0.049	0.0575	0.0485	0.0515	0.052	0.0475	0.045	0.0545	0.046	0.0405	0.056	0.044	0.055	0.0645	0.0505	0.034	0.0395	0.0515	0.049	0.0425	0.049	0.049	0.0855	0.0485	0.0555	0.0375	0.0385	0.06	0.0325	0.0465	0.0385	0.031	0.044	0.033	0.039
43	0.054	0.0545	0.0485	0.0565	0.049	0.052	0.053	0.0475	0.045	0.054	0.046	0.04	0.0535	0.042	0.055	0.065	0.0515	0.035	0.04	0.0515	0.0485	0.0425	0.05	0.05	0.0845	0.05	0.0525	0.0365	0.039	0.061	0.0325	0.0465	0.0385	0.0305	0.0425	0.0335	0.0395
43.25	0.055	0.054	0.0475	0.0565	0.0485	0.0515	0.0525	0.047	0.045	0.0545	0.0455	0.0405	0.053	0.0415	0.054	0.064	0.0505	0.0355	0.04	0.052	0.0465	0.0425	0.049	0.049	0.084	0.0485	0.0545	0.035	0.0385	0.0615	0.0325	0.047	0.039	0.03	0.042	0.0335	0.044
43.5	0.0545	0.0535	0.048	0.0565	0.0475	0.0515	0.051	0.047	0.045	0.0545	0.0455	0.04	0.0515	0.0405	0.0545	0.0645	0.049	0.035	0.0405	0.0515	0.0465	0.0425	0.0495	0.05	0.0835	0.0495	0.053	0.0355	0.0375	0.0605	0.032	0.0465	0.0375	0.0305	0.0415	0.0325	0.0405
43.75	0.055	0.0545	0.0485	0.056	0.0465	0.0515	0.0525	0.0475	0.044	0.055	0.044	0.0405	0.0505	0.041	0.0545	0.065	0.05	0.034	0.0395	0.05	0.0485	0.043	0.049	0.0475	0.084	0.0505	0.0515	0.0355	0.0365	0.06	0.031	0.0465	0.037	0.0295	0.041	0.032	0.038
44	0.054	0.054	0.049	0.057	0.0465	0.051	0.053	0.0465	0.0455	0.0545	0.044	0.04	0.051	0.041	0.056	0.0635	0.049	0.033	0.0385	0.05	0.0475	0.042	0.0495	0.0475	0.084	0.049	0.053	0.0355	0.0365	0.0595	0.0315	0.047	0.0375	0.029	0.042	0.032	0.037
44.25	0.0545	0.0535	0.049	0.0565	0.0465	0.053	0.052	0.046	0.0445	0.054	0.044	0.039	0.0505	0.041	0.056	0.065	0.0495	0.033	0.04	0.0485	0.045	0.041	0.0485	0.0475	0.0825	0.048	0.052	0.0345	0.037	0.058	0.033	0.046	0.0375	0.0295	0.0425	0.0325	0.038
44.5	0.054	0.0545	0.049	0.0545	0.045	0.052	0.0505	0.047	0.0455	0.054	0.044	0.0395	0.0505	0.0405	0.054	0.066	0.0485	0.0335	0.039	0.049	0.0455	0.0405	0.048	0.0485	0.082	0.0475	0.0525	0.0345	0.0375	0.0585	0.032	0.046	0.038	0.0295	0.042	0.032	0.04
44.75	0.053	0.054	0.0475	0.0555	0.0455	0.052	0.052	0.0455	0.0445	0.053	0.0435	0.039	0.052	0.0405	0.0545	0.0655	0.05	0.0335	0.039	0.0485	0.046	0.041	0.048	0.047	0.082	0.048	0.0515	0.0335	0.0365	0.059	0.0315	0.0465	0.0405	0.028	0.0405	0.031	0.0405
45	0.054	0.053	0.047	0.055	0.0465	0.0535	0.052	0.045	0.0425	0.0535	0.0435	0.041	0.1445	0.0405	0.0555	0.0645	0.0585	0.0325	0.0385	0.0485	0.0445	0.04	0.048	0.0465	0.0825	0.0475	0.0515	0.0335	0.036	0.0635	0.0315	0.046	0.0495	0.028	0.041	0.031	0.0375
45.25
45.5
45.75
46
46.25
46.5
46.75
47
47.25
47.5
47.75
48
48.25
48.5
48.75
49
49.25
49.5
49.75
50
50.25
50.5
50.75
51
51.25
51.5
51.75
52
52.25
52.5
52.75
53
53.25
53.5
53.75
54
54.25
54.5
54.75
55	0.041	0.0395	0.035	0.041	0.0335	0.04	0.039	0.0355	0.0325	0.0465	0.03	0.0295	0.042	0.0295	0.039	0.0565	0.0385	0.0245	0.031	0.035	0.0365	0.03	0.038	0.0365	0.06	0.037	0.0375	0.024	0.027	0.054	0.0235	0.033	0.0245	0.0185	0.0275	0.0215	0.026
55.25	0.0405	0.0395	0.036	0.0395	0.0335	0.04	0.0395	0.035	0.0325	0.0445	0.0295	0.028	0.041	0.029	0.038	0.056	0.0375	0.0245	0.03	0.0355	0.037	0.0285	0.038	0.0375	0.058	0.036	0.037	0.0245	0.027	0.0505	0.023	0.033	0.0245	0.019	0.027	0.021	0.0255
55.5	0.0405	0.04	0.0345	0.039	0.033	0.039	0.039	0.0345	0.0325	0.044	0.0295	0.028	0.0395	0.029	0.0375	0.058	0.037	0.025	0.03	0.036	0.0355	0.029	0.037	0.0365	0.0565	0.035	0.036	0.0245	0.028	0.049	0.023	0.0325	0.0235	0.019	0.027	0.021	0.0245
55.75	0.0405	0.0395	0.0345	0.0385	0.0325	0.039	0.0385	0.035	0.0325	0.0435	0.0295	0.0275	0.039	0.029	0.0365	0.056	0.037	0.025	0.029	0.035	0.0355	0.0285	0.037	0.036	0.0575	0.035	0.0365	0.024	0.0275	0.049	0.0225	0.032	0.0235	0.0175	0.0265	0.021	0.024
56	0.0395	0.039	0.035	0.0375	0.033	0.039	0.039	0.0345	0.032	0.043	0.0295	0.028	0.0395	0.029	0.036	0.056	0.036	0.025	0.029	0.0355	0.037	0.029	0.0365	0.035	0.0555	0.035	0.0375	0.0235	0.028	0.0485	0.022	0.032	0.024	0.018	0.0265	0.021	0.024
56.25	0.0385	0.0385	0.0355	0.0375	0.0325	0.0385	0.038	0.034	0.032	0.044	0.028	0.0275	0.0395	0.0285	0.0355	0.0565	0.0365	0.0255	0.029	0.035	0.0375	0.028	0.0355	0.0355	0.0565	0.0345	0.0375	0.0235	0.0275	0.049	0.0215	0.0315	0.0235	0.0175	0.026	0.02	0.0235
56.5	0.039	0.0385	0.035	0.0365	0.032	0.038	0.0385	0.0335	0.0315	0.044	0.028	0.027	0.0395	0.0285	0.036	0.055	0.037	0.024	0.0285	0.0345	0.036	0.0275	0.0355	0.036	0.0565	0.0345	0.0355	0.023	0.0265	0.0475	0.022	0.0305	0.023	0.0175	0.0245	0.0195	0.024
56.75	0.038	0.038	0.0345	0.035	0.032	0.038	0.0375	0.034	0.0315	0.044	0.0275	0.0265	0.04	0.0285	0.0345	0.0535	0.0365	0.0235	0.0285	0.0345	0.0345	0.0275	0.0355	0.0345	0.0555	0.034	0.035	0.023	0.026	0.047	0.022	0.0305	0.023	0.017	0.0245	0.0195	0.0235
57	0.037	0.038	0.034	0.0345	0.0305	0.0375	0.0375	0.034	0.031	0.044	0.0275	0.0265	0.043	0.028	0.034	0.052	0.036	0.0235	0.028	0.034	0.035	0.0275	0.0345	0.0345	0.0555	0.0345	0.036	0.023	0.025	0.0475	0.0215	0.0295	0.0225	0.017	0.025	0.019	0.0235
57.25	0.038	0.0375	0.0335	0.035	0.0295	0.037	0.0365	0.033	0.031	0.044	0.0265	0.0265	0.043	0.028	0.034	0.051	0.0355	0.024	0.0275	0.0335	0.0355	0.0265	0.035	0.0345	0.0535	0.0345	0.036	0.0225	0.0255	0.047	0.021	0.0285	0.022	0.0165	0.025	0.019	0.0235
57.5	0.0375	0.038	0.034	0.035	0.03	0.037	0.037	0.034	0.03	0.043	0.027	0.0265	0.0395	0.0275	0.0325	0.0505	0.036	0.024	0.0285	0.0345	0.035	0.0265	0.035	0.0345	0.0525	0.033	0.035	0.0225	0.025	0.047	0.021	0.028	0.022	0.0165	0.024	0.019	0.0235
57.75	0.0375	0.0375	0.034	0.036	0.03	0.0365	0.0365	0.033	0.0305	0.0425	0.027	0.033	0.038	0.03	0.0335	0.053	0.035	0.024	0.028	0.0345	0.0345	0.026	0.035	0.0335	0.052	0.033	0.035	0.022	0.0255	0.061	0.02	0.029	0.022	0.016	0.0235	0.0185	0.0225
58	0.036	0.0365	0.0345	0.034	0.03	0.0365	0.036	0.0325	0.0295	0.0425	0.027	0.0625	0.0395	0.043	0.0365	0.062	0.0355	0.0235	0.0285	0.033	0.0325	0.026	0.0335	0.032	0.052	0.0325	0.034	0.022	0.026	0.124	0.0205	0.034	0.0225	0.0165	0.024	0.0185	0.0225
58.25	0.035	0.036	0.034	0.0335	0.0295	0.036	0.0365	0.033	0.0295	0.0425	0.026	0.033	0.04	0.031	0.032	0.0525	0.0355	0.0225	0.028	0.033	0.0325	0.025	0.034	0.0335	0.052	0.033	0.033	0.0215	0.025	0.063	0.021	0.0295	0.0215	0.0165	0.0235	0.018	0.0225
58.5	0.0345	0.0365	0.0325	0.034	0.03	0.0355	0.035	0.032	0.0295	0.0415	0.0255	0.0255	0.037	0.0275	0.0305	0.0495	0.035	0.023	0.0275	0.0325	0.033	0.0255	0.033	0.0325	0.0515	0.0315	0.033	0.022	0.0245	0.0455	0.02	0.0275	0.0215	0.0165	0.0225	0.018	0.0225
58.75	0.0355	0.0355	0.0325	0.0325	0.029	0.036	0.0345	0.0315	0.029	0.0405	0.0245	0.0245	0.0375	0.027	0.0305	0.0485	0.035	0.023	0.028	0.032	0.033	0.0245	0.0335	0.032	0.0505	0.0315	0.033	0.022	0.0245	0.045	0.0195	0.0275	0.0215	0.0165	0.0225	0.0175	0.022
59	0.034	0.0345	0.033	0.032	0.028	0.0355	0.0345	0.0315	0.029	0.0405	0.024	0.024	0.038	0.0265	0.0305	0.0475	0.035	0.0225	0.0275	0.032	0.032	0.024	0.0335	0.031	0.049	0.031	0.0325	0.0215	0.025	0.0445	0.0195	0.027	0.021	0.0155	0.022	0.0175	0.022
59.25	0.0345	0.035	0.032	0.032	0.0275	0.0345	0.034	0.032	0.028	0.041	0.025	0.0245	0.036	0.026	0.0295	0.048	0.0345	0.023	0.0275	0.031	0.032	0.024	0.0325	0.031	0.0485	0.0305	0.0325	0.0215	0.0245	0.045	0.0195	0.0265	0.021	0.0155	0.0215	0.017	0.0215
59.5	0.0345	0.035	0.031	0.0315	0.028	0.0335	0.035	0.0315	0.028	0.041	0.0235	0.024	0.0395	0.0265	0.0295	0.0485	0.0345	0.022	0.027	0.0315	0.032	0.0235	0.032	0.03	0.049	0.0305	0.0315	0.021	0.024	0.044	0.019	0.0265	0.021	0.0155	0.0225	0.0175	0.021
59.75	0.033	0.0345	0.031	0.0305	0.027	0.033	0.034	0.031	0.0275	0.04	0.024	0.0245	0.0385	0.026	0.029	0.048	0.034	0.0215	0.0265	0.031	0.0315	0.024	0.032	0.03	0.0495	0.03	0.0305	0.0215	0.0245	0.044	0.019	0.027	0.0205	0.0155	0.0225	0.0175	0.021
60	0.0325	0.034	0.0315	0.0305	0.028	0.0325	0.0335	0.031	0.0275	0.0395	0.0235	0.024	0.0355	0.026	0.029	0.0475	0.034	0.022	0.0275	0.0305	0.0315	0.024	0.0325	0.031	0.048	0.0305	0.0305	0.0215	0.024	0.0445	0.0195	0.025	0.0205	0.015	0.021	0.0165	0.021
60.25	0.033	0.0325	0.0305	0.0305	0.0275	0.0335	0.034	0.03	0.0275	0.0405	0.023	0.024	0.035	0.0255	0.028	0.0455	0.0345	0.0215	0.026	0.0305	0.03	0.024	0.0315	0.031	0.0475	0.0305	0.0305	0.021	0.0235	0.0435	0.019	0.0255	0.02	0.0145	0.021	0.0165	0.021
60.5	0.0335	0.033	0.0305	0.0305	0.0265	0.033	0.0335	0.03	0.0275	0.0395	0.023	0.0235	0.035	0.025	0.027	0.045	0.0335	0.0215	0.0255	0.0305	0.029	0.0235	0.0315	0.0315	0.0475	0.0295	0.0305	0.02	0.024	0.0435	0.019	0.026	0.02	0.0145	0.0215	0.0165	0.02
60.75	0.0315	0.0325	0.031	0.03	0.026	0.0325	0.033	0.0295	0.027	0.039	0.022	0.023	0.0345	0.025	0.0265	0.0465	0.0335	0.021	0.0265	0.03	0.0295	0.023	0.032	0.0305	0.0465	0.029	0.031	0.02	0.0235	0.043	0.019	0.0255	0.0205	0.0145	0.021	0.016	0.0195
61	0.0315	0.0325	0.03	0.0295	0.0265	0.032	0.033	0.029	0.0265	0.039	0.022	0.024	0.035	0.0245	0.027	0.047	0.033	0.02	0.026	0.0305	0.0295	0.022	0.0305	0.031	0.046	0.029	0.029	0.0205	0.023	0.0445	0.018	0.0255	0.02	0.0145	0.0205	0.0165	0.02
61.25	0.0325	0.032	0.03	0.0285	0.0255	0.0315	0.0325	0.0285	0.026	0.0395	0.0215	0.023	0.035	0.025	0.0255	0.046	0.0315	0.0205	0.025	0.0295	0.029	0.023	0.03	0.03	0.045	0.029	0.029	0.02	0.023	0.043	0.0175	0.0245	0.0195	0.014	0.021	0.0155	0.0205
61.5	0.0315	0.031	0.0295	0.0275	0.025	0.031	0.0315	0.029	0.026	0.0385	0.022	0.022	0.035	0.0245	0.025	0.0445	0.0315	0.02	0.025	0.0295	0.0285	0.022	0.0305	0.031	0.0455	0.028	0.029	0.02	0.0225	0.042	0.018	0.0235	0.019	0.0145	0.0205	0.0155	0.0195
61.75	0.03	0.0305	0.029	0.028	0.025	0.0305	0.0315	0.0285	0.0255	0.0375	0.0215	0.0225	0.0355	0.024	0.025	0.044	0.0315	0.02	0.025	0.0285	0.028	0.022	0.0295	0.03	0.045	0.028	0.028	0.02	0.0225	0.043	0.018	0.024	0.0185	0.014	0.02	0.0155	0.0195
62	0.03	0.0295	0.0295	0.0285	0.0245	0.03	0.0315	0.0275	0.0255	0.037	0.021	0.0225	0.0355	0.0235	0.025	0.044	0.0315	0.02	0.0245	0.0285	0.0275	0.0215	0.029	0.029	0.0455	0.0275	0.028	0.0195	0.022	0.043	0.018	0.0235	0.0185	0.014	0.0195	0.015	0.019
62.25	0.0295	0.029	0.029	0.028	0.0245	0.03	0.032	0.0275	0.025	0.037	0.0215	0.022	0.0335	0.024	0.024	0.044	0.0305	0.0195	0.0245	0.0285	0.027	0.0215	0.0295	0.0285	0.044	0.028	0.028	0.0195	0.021	0.042	0.017	0.023	0.018	0.013	0.0195	0.015	0.0185
62.5	0.029	0.029	0.029	0.0265	0.0245	0.029	0.031	0.0275	0.0245	0.036	0.021	0.022	0.0335	0.024	0.024	0.0415	0.0305	0.0195	0.0235	0.028	0.0265	0.0215	0.0285	0.029	0.0435	0.0275	0.0275	0.0195	0.0215	0.041	0.017	0.023	0.0185	0.013	0.019	0.0145	0.018
62.75	0.028	0.028	0.0285	0.026	0.0235	0.0295	0.0305	0.0275	0.024	0.0365	0.02	0.0225	0.033	0.024	0.024	0.0415	0.0295	0.019	0.024	0.028	0.027	0.021	0.0285	0.027	0.0435	0.0275	0.027	0.019	0.0215	0.042	0.017	0.023	0.018	0.0135	0.019	0.0145	0.018
63	0.0285	0.029	0.028	0.0255	0.023	0.0285	0.031	0.0265	0.024	0.0365	0.02	0.022	0.0325	0.0235	0.0235	0.0425	0.03	0.019	0.024	0.028	0.0265	0.0205	0.0285	0.027	0.043	0.026	0.0265	0.019	0.021	0.0435	0.017	0.023	0.018	0.013	0.0185	0.014	0.018
63.25	0.028	0.028	0.0275	0.025	0.023	0.028	0.0305	0.0265	0.0245	0.0355	0.02	0.021	0.033	0.0225	0.0235	0.042	0.03	0.0185	0.0225	0.0265	0.026	0.0205	0.027	0.0275	0.042	0.027	0.026	0.019	0.0205	0.04	0.017	0.0225	0.018	0.013	0.0185	0.0145	0.0175
63.5	0.0265	0.027	0.027	0.025	0.023	0.0285	0.03	0.026	0.024	0.0345	0.019	0.0205	0.0335	0.0225	0.023	0.0415	0.029	0.0175	0.0225	0.0265	0.0255	0.0205	0.0275	0.026	0.0415	0.0265	0.027	0.019	0.0205	0.0385	0.0165	0.022	0.017	0.013	0.018	0.014	0.018
63.75	0.0265	0.027	0.0265	0.025	0.022	0.0285	0.0305	0.025	0.024	0.0345	0.019	0.0215	0.0325	0.023	0.023	0.0425	0.0295	0.018	0.0225	0.0275	0.0255	0.02	0.027	0.026	0.041	0.0265	0.0265	0.019	0.02	0.039	0.016	0.0215	0.017	0.0125	0.018	0.014	0.018
64	0.0265	0.0275	0.0265	0.0245	0.022	0.028	0.0305	0.0245	0.024	0.0345	0.0185	0.0225	0.035	0.023	0.0245	0.0455	0.029	0.018	0.0225	0.027	0.0245	0.0195	0.0265	0.0265	0.04	0.026	0.0245	0.0185	0.02	0.0405	0.016	0.0225	0.017	0.0125	0.018	0.014	0.018
64.25	0.026	0.027	0.0265	0.0235	0.022	0.028	0.0295	0.0245	0.0225	0.034	0.018	0.021	0.04	0.022	0.0225	0.043	0.0285	0.0175	0.0215	0.026	0.0245	0.0195	0.026	0.027	0.039	0.0255	0.024	0.0185	0.02	0.0395	0.016	0.0215	0.0165	0.013	0.0175	0.0135	0.017
64.5	0.026	0.026	0.026	0.023	0.022	0.028	0.0295	0.0245	0.0225	0.0325	0.018	0.02	0.0365	0.0215	0.0225	0.0405	0.0285	0.017	0.0215	0.025	0.024	0.0185	0.026	0.0275	0.039	0.025	0.024	0.0185	0.02	0.0385	0.0155	0.021	0.016	0.012	0.017	0.013	0.017
64.75	0.0255	0.0255	0.0265	0.023	0.022	0.027	0.0285	0.0245	0.0225	0.033	0.018	0.02	0.0315	0.0215	0.022	0.0405	0.0285	0.017	0.0215	0.025	0.024	0.019	0.0255	0.027	0.039	0.0255	0.024	0.018	0.019	0.0385	0.0155	0.021	0.0165	0.012	0.016	0.013	0.017
65	0.0255	0.0255	0.0265	0.0225	0.022	0.026	0.029	0.0235	0.023	0.0335	0.018	0.02	0.0305	0.0215	0.022	0.0395	0.0275	0.017	0.0215	0.025	0.023	0.0185	0.0255	0.025	0.038	0.0245	0.024	0.0175	0.019	0.0385	0.015	0.021	0.016	0.0115	0.0165	0.0125	0.017
65.25	0.024	0.0255	0.025	0.022	0.0215	0.0255	0.029	0.0235	0.0215	0.0335	0.018	0.0195	0.0295	0.0215	0.021	0.039	0.028	0.017	0.021	0.0255	0.0225	0.0185	0.025	0.0255	0.037	0.0245	0.0235	0.0175	0.0195	0.0385	0.015	0.021	0.016	0.0115	0.0165	0.0125	0.016
65.5	0.024	0.025	0.025	0.0225	0.0215	0.026	0.0285	0.0235	0.0205	0.0325	0.017	0.0195	0.03	0.021	0.0205	0.038	0.0275	0.0165	0.021	0.0245	0.0225	0.018	0.0255	0.025	0.038	0.0245	0.0235	0.0175	0.019	0.0375	0.0145	0.0205	0.0155	0.011	0.0165	0.0125	0.016
65.75	0.024	0.0245	0.0255	0.0215	0.021	0.026	0.028	0.023	0.0205	0.032	0.017	0.019	0.0315	0.0205	0.02	0.039	0.026	0.016	0.0205	0.0245	0.0225	0.018	0.0245	0.0255	0.0375	0.0245	0.024	0.0175	0.0185	0.037	0.0145	0.02	0.015	0.011	0.0165	0.0125	0.016
66	0.0235	0.024	0.025	0.021	0.0205	0.025	0.0275	0.022	0.0205	0.032	0.0165	0.02	0.031	0.021	0.021	0.0385	0.0265	0.016	0.021	0.024	0.0225	0.0175	0.024	0.0245	0.0375	0.024	0.023	0.0175	0.018	0.039	0.014	0.0195	0.0145	0.011	0.016	0.012	0.016
66.25	0.0235	0.024	0.025	0.0215	0.0205	0.0245	0.027	0.022	0.0205	0.0315	0.0165	0.019	0.0305	0.021	0.02	0.037	0.0265	0.0155	0.02	0.024	0.022	0.017	0.0235	0.025	0.0375	0.0235	0.022	0.0175	0.0175	0.0365	0.014	0.0195	0.015	0.011	0.016	0.012	0.0155
66.5	0.023	0.024	0.024	0.021	0.02	0.0245	0.0265	0.0215	0.0205	0.0305	0.0165	0.0185	0.031	0.0205	0.0195	0.038	0.0265	0.0155	0.0195	0.023	0.021	0.017	0.0235	0.025	0.0365	0.0235	0.0225	0.017	0.018	0.036	0.014	0.019	0.0145	0.0105	0.0155	0.0115	0.016
66.75	0.0225	0.024	0.024	0.02	0.0195	0.024	0.0265	0.0215	0.02	0.031	0.0155	0.019	0.0305	0.0205	0.0195	0.039	0.026	0.0155	0.0195	0.0235	0.021	0.017	0.024	0.024	0.0355	0.023	0.0225	0.017	0.017	0.036	0.014	0.019	0.0145	0.0105	0.015	0.0115	0.0155
67	0.022	0.024	0.023	0.0195	0.0195	0.0245	0.0265	0.0215	0.02	0.03	0.0155	0.0185	0.03	0.02	0.0195	0.0385	0.025	0.015	0.019	0.023	0.0205	0.017	0.023	0.0245	0.036	0.0225	0.0225	0.017	0.0175	0.036	0.014	0.019	0.014	0.0105	0.0155	0.0115	0.0145
67.25	0.022	0.024	0.024	0.0195	0.019	0.024	0.0265	0.0205	0.0195	0.0295	0.0155	0.018	0.0295	0.0195	0.0195	0.037	0.0255	0.015	0.0185	0.0235	0.02	0.0165	0.0225	0.024	0.035	0.0225	0.022	0.017	0.017	0.0355	0.0135	0.0185	0.014	0.0105	0.0145	0.011	0.0145
67.5	0.0215	0.024	0.0235	0.0195	0.019	0.0225	0.026	0.02	0.019	0.0295	0.0155	0.018	0.029	0.0195	0.0195	0.0365	0.0255	0.0145	0.019	0.0225	0.02	0.0165	0.023	0.024	0.0345	0.0225	0.021	0.0165	0.0165	0.035	0.0135	0.018	0.014	0.011	0.0145	0.011	0.0145
67.75	0.021	0.0225	0.0235	0.019	0.0195	0.0235	0.0255	0.02	0.019	0.029	0.015	0.0185	0.029	0.0195	0.019	0.0365	0.025	0.0145	0.0185	0.0215	0.02	0.016	0.0215	0.022	0.0335	0.0225	0.022	0.0165	0.0165	0.0355	0.013	0.0185	0.014	0.01	0.0145	0.011	0.014
68	0.0205	0.0225	0.024	0.019	0.0185	0.023	0.025	0.02	0.018	0.029	0.015	0.02	0.029	0.0205	0.019	0.0365	0.024	0.014	0.0185	0.0215	0.02	0.0165	0.0215	0.022	0.034	0.0225	0.0205	0.016	0.0165	0.0395	0.0135	0.019	0.0135	0.01	0.014	0.011	0.014
68.25	0.02	0.0225	0.0235	0.0185	0.018	0.0225	0.025	0.0195	0.0185	0.029	0.015	0.018	0.029	0.0195	0.0185	0.035	0.024	0.014	0.018	0.022	0.0195	0.0155	0.022	0.022	0.035	0.0215	0.0205	0.016	0.016	0.0355	0.013	0.018	0.0135	0.0095	0.014	0.0105	0.014
68.5	0.02	0.0215	0.0235	0.0185	0.018	0.0225	0.024	0.0195	0.0185	0.0285	0.015	0.0175	0.0285	0.0185	0.0175	0.035	0.024	0.0145	0.018	0.0215	0.0195	0.015	0.0215	0.0215	0.034	0.0215	0.0195	0.0155	0.0155	0.0335	0.0125	0.0185	0.0135	0.0095	0.0145	0.0105	0.014
68.75	0.02	0.022	0.0225	0.0185	0.018	0.0215	0.024	0.019	0.018	0.028	0.0145	0.0175	0.028	0.0185	0.0175	0.035	0.023	0.014	0.0175	0.021	0.019	0.015	0.021	0.021	0.033	0.021	0.02	0.0155	0.0155	0.034	0.0125	0.018	0.013	0.01	0.0135	0.0105	0.0135
69	0.019	0.0215	0.023	0.0175	0.018	0.022	0.0245	0.0185	0.0175	0.027	0.0145	0.018	0.0295	0.0185	0.018	0.0355	0.0235	0.014	0.017	0.0205	0.019	0.0145	0.0205	0.0205	0.0325	0.0205	0.021	0.0155	0.0155	0.034	0.013	0.0175	0.013	0.01	0.0135	0.0105	0.013
69.25	0.019	0.0215	0.023	0.0175	0.017	0.021	0.0235	0.0185	0.0175	0.027	0.014	0.018	0.0295	0.0185	0.018	0.0355	0.0225	0.013	0.017	0.0205	0.0185	0.0145	0.0205	0.021	0.033	0.0205	0.0195	0.015	0.0155	0.033	0.0125	0.0175	0.013	0.01	0.0135	0.0105	0.013
69.5	0.019	0.0205	0.022	0.018	0.0175	0.021	0.0235	0.018	0.0175	0.0265	0.0135	0.017	0.0285	0.018	0.017	0.0355	0.022	0.0135	0.0175	0.02	0.018	0.0145	0.0195	0.0205	0.032	0.02	0.019	0.015	0.0155	0.0325	0.0125	0.017	0.013	0.009	0.013	0.01	0.013
69.75	0.019	0.0205	0.0215	0.0175	0.0175	0.021	0.023	0.0185	0.0175	0.0255	0.0135	0.017	0.0275	0.0175	0.017	0.035	0.0225	0.013	0.0165	0.02	0.0175	0.014	0.0205	0.021	0.031	0.0205	0.019	0.015	0.015	0.0325	0.012	0.017	0.0135	0.009	0.0135	0.01	0.0125
70	0.0185	0.02	0.0215	0.0165	0.017	0.0205	0.0235	0.018	0.017	0.026	0.0135	0.016	0.0265	0.0175	0.017	0.0345	0.022	0.013	0.0165	0.0195	0.0175	0.014	0.0195	0.021	0.0315	0.02	0.019	0.014	0.0145	0.033	0.011	0.016	0.0125	0.009	0.0125	0.01	0.013
70.25	0.018	0.0205	0.022	0.0165	0.017	0.02	0.0235	0.018	0.0165	0.0255	0.0135	0.0165	0.028	0.017	0.017	0.0345	0.0225	0.013	0.0165	0.0195	0.017	0.0135	0.019	0.02	0.031	0.0195	0.0185	0.014	0.0135	0.032	0.0115	0.017	0.013	0.009	0.0125	0.0095	0.013
70.5	0.018	0.0205	0.022	0.0165	0.016	0.019	0.0225	0.0175	0.016	0.0255	0.013	0.0165	0.0275	0.017	0.0165	0.035	0.022	0.013	0.016	0.0195	0.017	0.0135	0.0185	0.02	0.03	0.0195	0.0175	0.014	0.014	0.032	0.012	0.0165	0.0125	0.009	0.0125	0.0095	0.012
70.75	0.018	0.02	0.021	0.0165	0.016	0.0195	0.022	0.0175	0.0155	0.0255	0.0125	0.0165	0.03	0.017	0.0165	0.0335	0.0215	0.013	0.0165	0.019	0.017	0.0135	0.019	0.0195	0.03	0.02	0.0175	0.014	0.0145	0.032	0.011	0.016	0.0115	0.009	0.0125	0.0095	0.012
71	0.0175	0.02	0.0215	0.0155	0.016	0.0195	0.0225	0.0165	0.016	0.0255	0.0125	0.0165	0.037	0.0165	0.016	0.033	0.022	0.012	0.0155	0.0185	0.017	0.0135	0.019	0.0185	0.029	0.0195	0.0175	0.0135	0.014	0.033	0.011	0.0165	0.012	0.009	0.0125	0.0095	0.012
71.25	0.017	0.0195	0.0205	0.0155	0.016	0.019	0.0215	0.016	0.016	0.025	0.0125	0.016	0.0335	0.0165	0.016	0.0335	0.021	0.012	0.0155	0.0185	0.0165	0.013	0.0185	0.019	0.029	0.019	0.017	0.013	0.014	0.0315	0.011	0.016	0.0115	0.009	0.0125	0.009	0.012
71.5	0.017	0.02	0.0205	0.015	0.0155	0.019	0.0215	0.0165	0.0155	0.0245	0.0125	0.016	0.0355	0.0165	0.0155	0.0335	0.0205	0.012	0.015	0.0185	0.0165	0.013	0.0185	0.019	0.029	0.019	0.017	0.013	0.0135	0.031	0.011	0.016	0.011	0.009	0.0125	0.0095	0.012
71.75	0.016	0.019	0.0205	0.0155	0.0155	0.019	0.022	0.0165	0.015	0.0235	0.0125	0.016	0.0295	0.016	0.0155	0.0335	0.021	0.012	0.015	0.018	0.0165	0.0125	0.018	0.0185	0.029	0.019	0.017	0.0135	0.0135	0.031	0.0105	0.0155	0.0105	0.008	0.0125	0.009	0.012
72	0.0165	0.019	0.0205	0.015	0.015	0.0185	0.0215	0.016	0.0155	0.024	0.0125	0.017	0.0275	0.0165	0.0165	0.034	0.0215	0.012	0.015	0.0185	0.0165	0.0125	0.018	0.018	0.029	0.019	0.0165	0.013	0.013	0.0305	0.0105	0.015	0.011	0.0085	0.012	0.009	0.012
72.25	0.016	0.019	0.0195	0.0145	0.015	0.0175	0.0205	0.016	0.0155	0.023	0.0125	0.016	0.0275	0.0165	0.0155	0.032	0.0205	0.012	0.0145	0.0175	0.0165	0.0125	0.017	0.018	0.028	0.019	0.016	0.013	0.013	0.0305	0.01	0.0155	0.011	0.0085	0.012	0.0085	0.011
72.5	0.016	0.0185	0.02	0.015	0.015	0.017	0.0205	0.016	0.015	0.0225	0.012	0.0155	0.026	0.016	0.015	0.0315	0.02	0.011	0.0145	0.0175	0.016	0.012	0.017	0.018	0.0275	0.019	0.016	0.0125	0.0135	0.03	0.01	0.015	0.011	0.008	0.0115	0.0085	0.011
72.75	0.0155	0.0185	0.02	0.015	0.014	0.0175	0.0205	0.015	0.0145	0.022	0.011	0.0155	0.026	0.0155	0.015	0.032	0.0195	0.0115	0.0145	0.0175	0.015	0.0115	0.017	0.0175	0.0265	0.018	0.0155	0.013	0.0125	0.03	0.01	0.015	0.0105	0.008	0.0115	0.008	0.011
73	0.015	0.018	0.02	0.0145	0.0145	0.017	0.0205	0.015	0.014	0.0225	0.0115	0.015	0.028	0.0155	0.015	0.032	0.0195	0.011	0.0145	0.0175	0.015	0.011	0.017	0.0175	0.0275	0.0175	0.0155	0.012	0.0125	0.03	0.01	0.0145	0.0105	0.008	0.0115	0.0085	0.011
73.25	0.015	0.018	0.019	0.0145	0.015	0.017	0.0195	0.0145	0.014	0.022	0.0115	0.0155	0.0295	0.015	0.0145	0.0315	0.0195	0.011	0.014	0.0175	0.015	0.011	0.016	0.0175	0.027	0.017	0.0155	0.012	0.012	0.0295	0.01	0.014	0.01	0.008	0.0115	0.0085	0.011
73.5	0.015	0.0175	0.019	0.014	0.0145	0.0165	0.0195	0.0145	0.0135	0.0215	0.011	0.0145	0.026	0.0155	0.014	0.031	0.019	0.011	0.014	0.017	0.0145	0.011	0.0155	0.0175	0.026	0.017	0.015	0.012	0.0115	0.0285	0.0095	0.0145	0.01	0.008	0.0115	0.0085	0.0105
73.75	0.015	0.0175	0.0185	0.013	0.014	0.016	0.0195	0.0145	0.0135	0.021	0.0115	0.0145	0.026	0.0155	0.014	0.0315	0.019	0.011	0.0135	0.0165	0.015	0.011	0.0165	0.017	0.0255	0.017	0.0155	0.012	0.012	0.0295	0.009	0.0145	0.01	0.008	0.0115	0.008	0.011
74	0.0145	0.0175	0.0185	0.0135	0.0135	0.016	0.0195	0.0135	0.0135	0.021	0.011	0.015	0.0255	0.0155	0.014	0.031	0.0195	0.0105	0.0135	0.0165	0.015	0.011	0.016	0.0165	0.026	0.017	0.015	0.0115	0.0115	0.031	0.009	0.0145	0.01	0.008	0.011	0.008	0.011
74.25	0.015	0.0175	0.0185	0.0135	0.0135	0.016	0.0195	0.014	0.0135	0.021	0.0105	0.0145	0.0255	0.015	0.014	0.031	0.0185	0.0105	0.0135	0.016	0.0145	0.011	0.015	0.016	0.025	0.0165	0.0145	0.011	0.0115	0.0285	0.009	0.0145	0.01	0.0075	0.011	0.0075	0.0105
74.5	0.0145	0.018	0.0185	0.0125	0.0135	0.0155	0.0195	0.0135	0.0135	0.0205	0.0105	0.014	0.025	0.0145	0.0135	0.0305	0.018	0.01	0.013	0.0165	0.015	0.011	0.015	0.016	0.0245	0.016	0.014	0.011	0.011	0.0275	0.009	0.0145	0.0095	0.007	0.0105	0.008	0.01
74.75	0.0145	0.017	0.0185	0.0125	0.0125	0.015	0.0185	0.0135	0.0125	0.0195	0.0105	0.014	0.0235	0.014	0.0135	0.03	0.018	0.01	0.013	0.016	0.015	0.011	0.015	0.0155	0.0245	0.0165	0.014	0.011	0.0105	0.0285	0.009	0.0135	0.009	0.007	0.0105	0.0075	0.01
75	0.014	0.016	0.0175	0.0125	0.0125	0.015	0.0175	0.0135	0.013	0.0195	0.0105	0.014	0.0245	0.0135	0.0135	0.029	0.0185	0.01	0.0125	0.0155	0.014	0.0105	0.0145	0.0155	0.024	0.016	0.014	0.011	0.011	0.0275	0.0085	0.0135	0.009	0.007	0.0105	0.0075	0.01
75.25	0.0135	0.016	0.017	0.0125	0.0125	0.0145	0.018	0.0135	0.0125	0.02	0.0105	0.0135	0.025	0.014	0.013	0.029	0.0175	0.01	0.0125	0.0155	0.0135	0.01	0.0145	0.015	0.024	0.016	0.0135	0.0105	0.011	0.0275	0.0085	0.0135	0.009	0.007	0.01	0.0075	0.01
75.5	0.013	0.016	0.0175	0.0125	0.012	0.0145	0.018	0.013	0.0125	0.0195	0.01	0.0135	0.0245	0.0145	0.013	0.0285	0.0175	0.01	0.012	0.016	0.0135	0.01	0.0145	0.015	0.024	0.0155	0.0135	0.0105	0.011	0.0265	0.008	0.0135	0.009	0.007	0.01	0.007	0.0095
75.75	0.0125	0.0155	0.017	0.0115	0.0125	0.015	0.0175	0.0135	0.012	0.0195	0.01	0.014	0.024	0.014	0.013	0.03	0.018	0.01	0.012	0.015	0.0135	0.0105	0.014	0.0145	0.0235	0.016	0.0135	0.01	0.0105	0.0265	0.008	0.0125	0.009	0.007	0.01	0.007	0.0095
76	0.0125	0.0155	0.018	0.0115	0.0115	0.0145	0.0175	0.0125	0.0115	0.0185	0.01	0.014	0.023	0.014	0.0125	0.0285	0.0175	0.01	0.012	0.0145	0.0125	0.01	0.0135	0.014	0.0235	0.0155	0.013	0.01	0.0105	0.029	0.008	0.013	0.0085	0.007	0.01	0.007	0.009
76.25	0.012	0.015	0.017	0.0115	0.0115	0.014	0.0175	0.0125	0.0115	0.018	0.0095	0.013	0.0235	0.0135	0.013	0.0285	0.0165	0.01	0.012	0.0145	0.013	0.01	0.0135	0.0135	0.023	0.0145	0.013	0.01	0.01	0.0265	0.008	0.013	0.0085	0.007	0.0095	0.007	0.009
76.5	0.0125	0.014	0.0165	0.0115	0.0115	0.0135	0.017	0.012	0.0115	0.0185	0.0095	0.013	0.024	0.0135	0.013	0.028	0.0165	0.009	0.0115	0.0145	0.012	0.0095	0.0135	0.0135	0.0225	0.0145	0.0125	0.01	0.01	0.026	0.008	0.0125	0.009	0.007	0.0095	0.0065	0.009
76.75	0.012	0.0145	0.017	0.0115	0.0115	0.013	0.017	0.012	0.011	0.0175	0.0095	0.0125	0.0245	0.0125	0.0125	0.027	0.016	0.009	0.0115	0.0145	0.012	0.0095	0.013	0.014	0.022	0.014	0.0125	0.0095	0.0095	0.025	0.008	0.0125	0.0085	0.0065	0.009	0.0065	0.009
77	0.012	0.0145	0.017	0.011	0.0115	0.013	0.0165	0.0115	0.0105	0.0175	0.009	0.013	0.024	0.0135	0.0125	0.0275	0.016	0.009	0.011	0.014	0.012	0.009	0.013	0.0135	0.0215	0.014	0.013	0.009	0.0095	0.025	0.008	0.0125	0.008	0.006	0.009	0.0065	0.009
77.25	0.0115	0.0145	0.016	0.0105	0.011	0.013	0.0165	0.0115	0.0105	0.017	0.009	0.013	0.0225	0.0125	0.0115	0.027	0.016	0.009	0.011	0.0135	0.012	0.009	0.013	0.013	0.0215	0.014	0.012	0.009	0.0095	0.0245	0.0075	0.0125	0.008	0.006	0.0085	0.0065	0.009
77.5	0.0115	0.014	0.0155	0.0105	0.0105	0.013	0.0155	0.0115	0.0105	0.0175	0.009	0.012	0.0225	0.0125	0.0115	0.0265	0.016	0.009	0.011	0.0135	0.012	0.0085	0.0125	0.013	0.0215	0.0135	0.0115	0.009	0.009	0.0245	0.007	0.012	0.008	0.006	0.0085	0.0065	0.009
77.75	0.011	0.0135	0.016	0.0105	0.0105	0.0125	0.016	0.011	0.0105	0.017	0.0085	0.012	0.022	0.012	0.012	0.0265	0.016	0.009	0.0105	0.0135	0.012	0.0085	0.0125	0.013	0.0205	0.0135	0.0115	0.009	0.009	0.0245	0.007	0.012	0.008	0.006	0.0085	0.0065	0.0085
78	0.011	0.0135	0.016	0.01	0.0105	0.0125	0.0155	0.0105	0.01	0.017	0.008	0.0125	0.022	0.012	0.0115	0.026	0.015	0.0085	0.011	0.013	0.012	0.0085	0.012	0.012	0.02	0.014	0.011	0.009	0.009	0.024	0.007	0.0115	0.0075	0.006	0.0085	0.0065	0.008
78.25	0.011	0.0135	0.0155	0.01	0.0105	0.0125	0.015	0.011	0.01	0.016	0.008	0.012	0.0235	0.012	0.011	0.026	0.015	0.008	0.01	0.0125	0.011	0.0085	0.012	0.012	0.0195	0.014	0.011	0.009	0.009	0.0235	0.007	0.0115	0.0075	0.006	0.008	0.006	0.008
78.5	0.011	0.0135	0.015	0.01	0.01	0.012	0.015	0.01	0.01	0.0155	0.008	0.012	0.0245	0.012	0.011	0.0255	0.015	0.008	0.0105	0.0125	0.011	0.008	0.012	0.012	0.0195	0.013	0.011	0.0085	0.0085	0.0235	0.007	0.0115	0.0075	0.006	0.008	0.006	0.008
78.75	0.0105	0.013	0.015	0.0095	0.0095	0.011	0.015	0.01	0.01	0.0155	0.008	0.012	0.024	0.0115	0.011	0.0255	0.014	0.008	0.01	0.0125	0.011	0.008	0.0115	0.0115	0.0195	0.013	0.0105	0.008	0.0085	0.0235	0.007	0.011	0.007	0.006	0.0075	0.006	0.008
79	0.01	0.013	0.015	0.0095	0.0095	0.011	0.0145	0.01	0.0095	0.0155	0.008	0.0115	0.023	0.0115	0.011	0.0255	0.0145	0.008	0.01	0.0125	0.011	0.008	0.011	0.0115	0.0195	0.013	0.011	0.008	0.0085	0.0235	0.0065	0.011	0.007	0.006	0.0075	0.006	0.008
79.25	0.01	0.0125	0.015	0.009	0.0095	0.011	0.014	0.0095	0.0095	0.015	0.008	0.011	0.0215	0.011	0.01	0.0245	0.014	0.008	0.01	0.0125	0.0105	0.008	0.0105	0.011	0.0185	0.012	0.01	0.008	0.008	0.023	0.006	0.011	0.007	0.006	0.0075	0.0055	0.008
79.5	0.01	0.0125	0.0145	0.009	0.0095	0.0115	0.014	0.0095	0.009	0.015	0.0075	0.0105	0.0205	0.011	0.01	0.0245	0.013	0.0075	0.0095	0.012	0.0105	0.0075	0.0105	0.0105	0.018	0.012	0.0105	0.0075	0.008	0.022	0.006	0.011	0.007	0.0055	0.0075	0.0055	0.0075
79.75	0.0095	0.0125	0.014	0.009	0.009	0.011	0.0135	0.009	0.0085	0.015	0.007	0.011	0.02	0.0105	0.01	0.0245	0.013	0.0075	0.009	0.0115	0.01	0.0075	0.0105	0.011	0.0175	0.0115	0.01	0.008	0.008	0.0215	0.006	0.0105	0.007	0.0055	0.007	0.0055	0.007
80	0.0095	0.0115	0.0135	0.009	0.0085	0.0105	0.0135	0.009	0.0085	0.014	0.007	0.0115	0.02	0.0105	0.01	0.0245	0.013	0.007	0.009	0.0115	0.01	0.007	0.01	0.0105	0.017	0.0115	0.01	0.007	0.0075	0.021	0.006	0.0105	0.007	0.005	0.007	0.005	0.007

## Sheet: TDW_SD
Each value represents the relative amount of power in a given frequency bin (column A); the data is depicted against a weighted reference as described in material and methods. Each columns represents data of one mouse
	WT																				KO
Freq[Hz]	_1WT_NO_CIRP03	_1WT_NO_CIRP04	_1WT_NO_CIRP05	_1WT_NO_CIRP09	_1WT_NO_CIRP11	_1WT_NO_CIRP18	_1WT_NO_CIRP19	_1WT_NO_CIRP29	_1WT_NO_CIRP30	_1WT_NO_CIRP31	_1WT_NO_CIRP48	_1WT_YS_TC03	_1WT_YS_TC06	_1WT_YS_TC08	_1WT_YS_TC09	_1WT_YS_TC12	_1WT_YS_TC13	_1WT_YS_TC18	_1WT_YS_TC21	_1WT_YS_TC22	_2KO_NO_CIRP01	_2KO_NO_CIRP10	_2KO_NO_CIRP13	_2KO_NO_CIRP14	_2KO_NO_CIRP15	_2KO_NO_CIRP20	_2KO_NO_CIRP25	_2KO_NO_CIRP40	_2KO_NO_CIRP50	_2KO_YS_TC01	_2KO_YS_TC07	_2KO_YS_TC10	_2KO_YS_TC15	_2KO_YS_TC16	_2KO_YS_TC17	_2KO_YS_TC19	_2KO_YS_TC20
0.75	1.504	2.109	1.781	1.218	1.43	1.951	1.385	0.832	0.905	1.151	0.685	1.643	0.749	0.865	0.722	0.901	1.002	0.806	0.662	0.773	1.766	1.081	1.099	1.48	1.932	1.208	1.646	0.736	0.739	1.265	0.667	0.987	1.005	0.748	3.565	0.84	1.171
1	1.439	1.901	1.828	1.35	1.416	2.1	1.581	0.964	1.043	1.144	0.796	1.588	0.942	1.059	0.851	0.934	1.109	1.087	0.933	0.946	1.816	1.318	1.399	1.713	1.968	1.362	1.406	0.933	0.928	1.45	0.806	1.126	1.059	0.793	2.978	1.119	1.694
1.25	1.426	1.762	1.805	1.375	1.478	2.077	1.685	1.153	1.201	1.181	0.882	1.684	1.097	1.185	0.992	1.036	1.101	1.27	1.122	1.071	1.769	1.617	1.596	1.879	2.093	1.36	1.436	1.115	1.041	1.602	0.928	1.284	1.132	0.83	2.513	1.287	1.878
1.5	1.36	1.654	1.707	1.23	1.492	2.014	1.686	1.232	1.286	1.224	0.925	1.61	1.133	1.221	1.063	1.06	1.063	1.406	1.191	0.991	1.783	1.699	1.647	1.973	2.13	1.377	1.376	1.28	1.08	1.466	0.983	1.292	1.176	0.859	1.927	1.407	2.125
1.75	1.295	1.59	1.608	1.14	1.484	1.852	1.642	1.283	1.325	1.171	0.914	1.485	1.061	1.186	1.029	0.997	0.945	1.433	1.12	0.97	1.667	1.552	1.558	1.881	2.063	1.328	1.237	1.333	1.067	1.389	1.101	1.265	1.17	0.807	1.611	1.355	1.96
2	1.216	1.506	1.321	1.063	1.395	1.812	1.618	1.304	1.289	1.143	0.894	1.222	1.01	1.095	1.074	0.896	0.888	1.474	1.099	0.915	1.484	1.556	1.566	1.754	1.927	1.257	1.131	1.31	1.063	1.279	0.998	1.148	1.181	0.777	1.425	1.304	1.604
2.25	1.196	1.423	1.204	1.025	1.295	1.775	1.571	1.244	1.248	1.12	0.869	1.161	0.974	1.092	1.094	0.843	0.85	1.366	1.059	0.866	1.314	1.47	1.497	1.639	1.605	1.156	1	1.338	1.052	1.181	0.87	1.155	1.117	0.764	1.22	1.206	1.653
2.5	1.134	1.3	1.222	1.062	1.187	1.675	1.512	1.193	1.219	1.08	0.842	1.175	0.845	0.985	1.019	0.775	0.806	1.253	1.031	0.802	1.284	1.345	1.402	1.404	1.323	1.084	0.92	1.273	0.997	1.18	0.771	1.108	1.019	0.698	1.077	1.154	1.378
2.75	1.059	1.201	1.12	1.151	1.152	1.44	1.43	1.171	1.182	1.021	0.785	1.042	0.788	0.845	0.994	0.744	0.732	1.233	0.985	0.725	1.237	1.178	1.296	1.296	1.169	0.985	0.833	1.195	0.95	1.105	0.739	0.953	0.956	0.673	0.926	1.115	1.082
3	0.984	1.101	1.033	1.179	1.058	1.312	1.27	1.092	1.107	0.989	0.753	0.893	0.813	0.777	0.973	0.679	0.688	1.185	0.921	0.682	1.227	1.205	1.273	1.179	1.174	0.853	0.775	1.1	0.948	1.06	0.804	0.882	0.879	0.609	0.851	0.982	0.914
3.25	0.878	0.979	1.076	1.104	0.989	1.221	1.17	0.985	1.021	0.914	0.679	0.82	0.76	0.77	0.859	0.57	0.659	1.092	0.838	0.612	1.192	1.021	1.13	1.065	1.128	0.797	0.69	1.029	0.843	0.919	0.743	0.811	0.813	0.554	0.761	0.893	0.956
3.5	0.803	0.945	0.937	0.981	0.876	1.037	1.078	0.884	0.907	0.822	0.653	0.757	0.689	0.737	0.783	0.523	0.601	0.924	0.717	0.579	1.027	0.859	1.008	0.989	0.941	0.743	0.61	0.899	0.783	0.801	0.624	0.72	0.739	0.489	0.672	0.772	0.806
3.75	0.764	0.892	0.964	0.89	0.841	1.018	0.983	0.863	0.882	0.746	0.619	0.656	0.661	0.669	0.75	0.493	0.567	0.859	0.725	0.553	0.981	0.752	0.94	0.927	0.867	0.694	0.582	0.862	0.762	0.791	0.639	0.659	0.699	0.49	0.603	0.703	0.692
4	0.726	0.86	0.907	0.885	0.808	0.962	0.88	0.813	0.824	0.734	0.596	0.67	0.642	0.613	0.729	0.455	0.539	0.851	0.661	0.512	0.935	0.717	0.864	0.865	0.85	0.68	0.567	0.844	0.724	0.745	0.638	0.627	0.674	0.485	0.591	0.663	0.699
4.25	0.713	0.808	0.846	0.904	0.787	0.912	0.904	0.8	0.792	0.71	0.578	0.592	0.599	0.606	0.668	0.456	0.544	0.866	0.632	0.501	0.889	0.691	0.818	0.859	0.801	0.633	0.569	0.788	0.681	0.735	0.646	0.618	0.611	0.433	0.57	0.63	0.654
4.5	0.643	0.796	0.786	0.889	0.756	0.886	0.864	0.77	0.796	0.72	0.59	0.59	0.597	0.608	0.649	0.46	0.549	0.807	0.583	0.47	0.851	0.65	0.771	0.832	0.73	0.63	0.581	0.769	0.694	0.725	0.681	0.592	0.58	0.412	0.557	0.617	0.643
4.75	0.627	0.757	0.743	0.893	0.718	0.873	0.861	0.751	0.768	0.705	0.588	0.575	0.612	0.603	0.652	0.438	0.522	0.747	0.584	0.487	0.864	0.643	0.77	0.838	0.74	0.631	0.576	0.733	0.668	0.739	0.617	0.606	0.576	0.402	0.535	0.565	0.648
5	0.638	0.724	0.762	0.872	0.74	0.852	0.833	0.71	0.734	0.664	0.567	0.576	0.611	0.585	0.655	0.44	0.526	0.729	0.583	0.478	0.892	0.677	0.757	0.828	0.676	0.606	0.556	0.709	0.686	0.751	0.648	0.554	0.554	0.413	0.57	0.584	0.574
5.25	0.631	0.748	0.787	0.883	0.728	0.851	0.803	0.695	0.752	0.653	0.572	0.551	0.615	0.583	0.636	0.418	0.55	0.693	0.593	0.467	0.878	0.648	0.729	0.843	0.625	0.605	0.565	0.726	0.692	0.764	0.685	0.547	0.538	0.407	0.61	0.579	0.674
5.5	0.629	0.768	0.78	0.88	0.731	0.882	0.797	0.714	0.755	0.678	0.572	0.555	0.61	0.59	0.625	0.44	0.541	0.727	0.578	0.477	0.816	0.633	0.726	0.852	0.642	0.622	0.551	0.698	0.713	0.732	0.699	0.571	0.542	0.416	0.596	0.597	0.688
5.75	0.618	0.767	0.824	0.908	0.744	0.927	0.817	0.745	0.757	0.712	0.592	0.524	0.661	0.555	0.641	0.47	0.541	0.791	0.591	0.504	0.78	0.656	0.712	0.829	0.683	0.642	0.578	0.703	0.743	0.72	0.672	0.54	0.548	0.422	0.626	0.598	0.581
6	0.652	0.814	0.886	0.905	0.773	0.965	0.869	0.755	0.79	0.722	0.611	0.539	0.675	0.614	0.699	0.486	0.542	0.81	0.591	0.486	0.803	0.684	0.706	0.814	0.667	0.697	0.619	0.704	0.766	0.723	0.676	0.51	0.549	0.416	0.688	0.605	0.57
6.25	0.703	0.944	0.83	0.931	0.818	1.006	0.927	0.805	0.807	0.726	0.632	0.542	0.695	0.662	0.726	0.511	0.552	0.832	0.637	0.544	0.873	0.647	0.744	0.822	0.671	0.746	0.643	0.758	0.817	0.697	0.708	0.557	0.583	0.421	0.781	0.65	0.612
6.5	0.756	1.074	0.939	1.063	0.888	1.118	1.046	0.874	0.894	0.727	0.687	0.546	0.759	0.795	0.8	0.562	0.592	0.928	0.744	0.613	0.89	0.736	0.787	0.854	0.742	0.828	0.676	0.854	0.886	0.763	0.827	0.595	0.692	0.431	0.882	0.679	0.737
6.75	0.916	1.365	1.327	1.278	1.153	1.477	1.373	1.037	1.082	0.849	0.838	0.676	0.928	0.974	0.977	0.688	0.672	1.197	0.889	0.749	1.171	0.877	0.888	1.004	0.864	1.025	0.855	1.03	1.054	0.882	1.205	0.681	0.901	0.491	1.089	0.817	1.023
7	1.083	1.63	1.479	1.382	1.347	1.929	1.61	1.202	1.27	1.002	0.949	0.776	1.044	1.096	1.082	0.762	0.781	1.441	1	0.832	1.292	0.993	0.972	1.089	0.967	1.209	0.981	1.147	1.186	0.97	1.515	0.735	0.984	0.532	1.222	0.956	0.999
7.25	1.299	2.042	1.598	1.531	1.484	2.295	1.835	1.422	1.497	1.104	1.073	0.774	1.175	1.222	1.227	0.866	0.853	1.7	1.134	0.876	1.436	1.092	1.114	1.154	1.142	1.414	1.083	1.32	1.291	1.052	1.471	0.807	1.189	0.598	1.393	1.153	0.941
7.5	1.549	2.553	1.908	1.788	1.669	2.727	2.28	1.658	1.79	1.263	1.188	0.853	1.327	1.411	1.423	0.984	0.98	1.932	1.308	0.963	1.675	1.286	1.201	1.308	1.41	1.739	1.209	1.44	1.488	1.162	1.55	0.958	1.407	0.691	1.52	1.379	0.844
7.75	1.757	3.089	2.133	2.078	1.783	3.064	2.685	1.982	2.074	1.409	1.265	1.133	1.441	1.519	1.625	1.023	1.104	2.082	1.497	1.107	2.111	1.563	1.439	1.472	1.535	1.985	1.285	1.528	1.677	1.358	1.438	1.056	1.637	0.838	1.721	1.539	0.885
8	1.953	3.671	2.288	2.523	1.911	3.453	2.984	2.235	2.368	1.638	1.414	1.812	1.638	1.668	1.852	1.103	1.253	2.333	1.625	1.253	2.339	1.764	1.706	1.711	1.692	2.343	1.46	1.706	1.894	1.715	1.542	1.356	1.804	0.946	2.121	1.635	0.918
8.25	2.347	3.913	2.147	2.854	2.203	3.88	3.059	2.548	2.674	1.902	1.623	1.28	1.723	1.843	2.053	1.149	1.404	2.571	1.778	1.499	2.554	1.931	1.986	1.998	1.803	2.637	1.663	1.936	2.155	1.734	1.538	1.522	1.862	1.05	2.331	1.679	0.969
8.5	2.583	3.675	1.866	3.163	2.427	3.969	2.926	2.695	2.928	2.234	1.815	1.305	1.883	1.826	2.236	1.198	1.619	2.578	1.926	1.67	2.752	2.027	2.356	2.276	2.085	2.676	2.001	2.051	2.331	1.856	1.728	1.717	1.888	1.121	2.39	1.752	1.067
8.75	2.695	3.284	1.763	3.632	2.414	3.672	2.761	2.658	2.928	2.484	1.841	1.379	1.958	1.831	2.481	1.311	1.709	2.442	1.882	1.847	2.654	2.041	2.55	2.745	2.555	2.561	1.996	2.182	2.465	2.059	1.742	1.969	1.861	1.218	2.328	1.643	1.151
9	2.683	2.804	1.693	3.612	2.346	3.148	2.34	2.375	2.818	2.664	1.743	1.486	1.914	1.806	2.461	1.246	1.845	2.213	1.812	1.868	2.18	1.764	2.562	3.189	2.508	2.326	2.047	2.273	2.653	1.976	1.585	2.011	1.749	1.305	2.164	1.601	1.12
9.25	2.547	2.258	1.368	3.208	2.064	2.677	1.851	1.961	2.412	2.724	1.66	1.412	1.837	1.662	2.479	1.242	1.868	1.948	1.661	1.849	1.726	1.54	2.566	3.5	2.178	1.969	2.081	2.149	2.566	1.915	1.382	1.966	1.492	1.331	1.816	1.474	1.102
9.5	2.098	1.686	1.092	2.645	1.718	2.197	1.422	1.633	1.925	2.505	1.539	1.278	1.739	1.439	2.174	1.072	1.741	1.579	1.389	1.75	1.452	1.39	2.433	3.459	1.722	1.555	1.866	1.921	2.409	1.579	1.335	1.836	1.194	1.37	1.441	1.208	1.082
9.75	1.58	1.28	0.903	2.154	1.455	1.748	1.186	1.33	1.518	2.105	1.32	1.274	1.524	1.214	1.79	0.882	1.399	1.207	1.096	1.367	1.076	1.137	2.034	2.925	1.271	1.184	1.509	1.665	2.169	1.269	1.186	1.44	0.996	1.203	1.181	1.075	0.861
10	1.235	1.02	0.76	1.84	1.219	1.331	0.985	1.164	1.24	1.762	1.055	1.118	1.307	0.976	1.488	0.759	1.136	0.937	0.862	1.14	0.912	0.911	1.749	2.328	0.971	0.993	1.211	1.399	1.819	1.028	1.071	1.177	0.808	1.068	0.969	0.87	0.813
10.25	0.955	0.837	0.588	1.432	0.979	1.086	0.847	1	1.068	1.456	0.851	0.849	1.053	0.825	1.176	0.667	0.99	0.818	0.681	0.997	0.804	0.744	1.354	1.858	0.804	0.835	1.022	1.192	1.621	0.89	0.994	0.935	0.665	0.989	0.772	0.735	0.913
10.5	0.761	0.751	0.547	1.161	0.835	0.889	0.736	0.873	0.9	1.15	0.705	0.731	0.881	0.644	0.927	0.544	0.801	0.697	0.585	0.86	0.707	0.662	1.116	1.592	0.628	0.702	0.86	1.021	1.334	0.767	0.751	0.719	0.572	0.843	0.575	0.663	0.825
10.75	0.646	0.663	0.504	1.005	0.71	0.751	0.626	0.74	0.806	0.942	0.569	0.658	0.788	0.559	0.754	0.47	0.627	0.625	0.485	0.709	0.575	0.571	0.933	1.282	0.547	0.605	0.7	0.845	1.127	0.602	0.602	0.606	0.491	0.702	0.52	0.567	0.778
11	0.567	0.55	0.465	0.898	0.674	0.674	0.548	0.635	0.704	0.797	0.472	0.554	0.7	0.474	0.625	0.386	0.54	0.557	0.429	0.55	0.522	0.534	0.796	1.067	0.472	0.546	0.639	0.746	0.962	0.515	0.512	0.504	0.436	0.562	0.441	0.479	0.648
11.25	0.497	0.501	0.372	0.782	0.589	0.587	0.472	0.539	0.594	0.705	0.41	0.486	0.618	0.392	0.556	0.33	0.441	0.454	0.37	0.45	0.479	0.459	0.679	0.897	0.431	0.484	0.562	0.623	0.79	0.452	0.464	0.45	0.399	0.471	0.415	0.447	0.589
11.5	0.454	0.459	0.33	0.68	0.51	0.509	0.405	0.454	0.513	0.597	0.335	0.424	0.54	0.343	0.476	0.303	0.38	0.374	0.323	0.4	0.386	0.404	0.567	0.752	0.356	0.407	0.518	0.494	0.664	0.401	0.385	0.392	0.357	0.394	0.351	0.405	0.479
11.75	0.409	0.397	0.28	0.6	0.48	0.444	0.368	0.409	0.468	0.499	0.304	0.366	0.47	0.309	0.425	0.268	0.33	0.335	0.278	0.349	0.361	0.35	0.494	0.614	0.312	0.364	0.464	0.441	0.56	0.36	0.325	0.334	0.319	0.336	0.309	0.346	0.343
12	0.368	0.363	0.26	0.51	0.424	0.388	0.34	0.358	0.417	0.449	0.269	0.324	0.417	0.279	0.379	0.239	0.291	0.316	0.245	0.307	0.324	0.296	0.437	0.525	0.289	0.333	0.383	0.388	0.487	0.317	0.337	0.287	0.29	0.294	0.278	0.287	0.305
12.25	0.334	0.325	0.244	0.428	0.386	0.353	0.293	0.319	0.349	0.393	0.24	0.281	0.372	0.254	0.335	0.22	0.265	0.303	0.216	0.281	0.283	0.263	0.384	0.446	0.262	0.301	0.329	0.314	0.418	0.259	0.274	0.258	0.241	0.273	0.267	0.256	0.264
12.5	0.296	0.291	0.228	0.386	0.355	0.337	0.258	0.281	0.309	0.338	0.218	0.252	0.335	0.229	0.298	0.194	0.252	0.265	0.201	0.253	0.258	0.232	0.339	0.399	0.238	0.264	0.319	0.281	0.366	0.242	0.247	0.243	0.215	0.241	0.233	0.231	0.226
12.75	0.271	0.255	0.195	0.356	0.317	0.309	0.227	0.255	0.268	0.282	0.208	0.232	0.296	0.214	0.275	0.172	0.214	0.241	0.193	0.217	0.226	0.213	0.299	0.344	0.215	0.252	0.279	0.263	0.334	0.216	0.225	0.212	0.197	0.209	0.224	0.21	0.204
13	0.258	0.228	0.189	0.303	0.268	0.27	0.208	0.241	0.251	0.262	0.192	0.221	0.269	0.196	0.248	0.163	0.194	0.237	0.172	0.19	0.205	0.195	0.257	0.312	0.209	0.237	0.245	0.249	0.307	0.21	0.209	0.192	0.183	0.196	0.216	0.202	0.19
13.25	0.238	0.22	0.18	0.272	0.263	0.247	0.197	0.216	0.234	0.244	0.176	0.19	0.248	0.181	0.231	0.147	0.179	0.226	0.159	0.191	0.188	0.189	0.23	0.285	0.193	0.21	0.212	0.224	0.282	0.2	0.192	0.173	0.162	0.176	0.203	0.188	0.158
13.5	0.211	0.212	0.159	0.262	0.241	0.234	0.179	0.214	0.216	0.212	0.164	0.181	0.235	0.171	0.212	0.141	0.165	0.208	0.152	0.181	0.182	0.178	0.216	0.256	0.172	0.193	0.201	0.205	0.266	0.183	0.167	0.161	0.151	0.155	0.192	0.174	0.142
13.75	0.194	0.197	0.176	0.238	0.225	0.221	0.169	0.195	0.2	0.205	0.15	0.178	0.223	0.165	0.197	0.137	0.157	0.197	0.142	0.165	0.158	0.171	0.199	0.232	0.164	0.183	0.187	0.198	0.24	0.167	0.17	0.152	0.146	0.147	0.179	0.166	0.163
14	0.185	0.192	0.18	0.225	0.207	0.213	0.156	0.178	0.187	0.187	0.149	0.169	0.22	0.162	0.184	0.128	0.154	0.2	0.14	0.155	0.156	0.161	0.186	0.219	0.156	0.17	0.174	0.191	0.229	0.172	0.163	0.14	0.144	0.143	0.158	0.166	0.123
14.25	0.172	0.178	0.158	0.211	0.182	0.201	0.158	0.172	0.175	0.173	0.141	0.148	0.213	0.159	0.173	0.126	0.148	0.195	0.13	0.147	0.149	0.147	0.177	0.208	0.15	0.163	0.162	0.176	0.221	0.168	0.152	0.133	0.129	0.135	0.163	0.156	0.122
14.5	0.165	0.178	0.143	0.195	0.172	0.192	0.151	0.164	0.164	0.169	0.142	0.153	0.201	0.152	0.174	0.123	0.143	0.181	0.121	0.144	0.143	0.132	0.171	0.195	0.158	0.163	0.153	0.165	0.208	0.148	0.162	0.125	0.127	0.125	0.162	0.149	0.12
14.75	0.161	0.173	0.152	0.193	0.163	0.195	0.146	0.161	0.16	0.153	0.131	0.143	0.183	0.14	0.163	0.118	0.136	0.172	0.121	0.137	0.14	0.13	0.166	0.185	0.154	0.157	0.147	0.16	0.196	0.14	0.145	0.123	0.124	0.121	0.151	0.143	0.117
15	0.155	0.16	0.137	0.183	0.15	0.191	0.143	0.148	0.153	0.146	0.128	0.135	0.181	0.135	0.154	0.11	0.128	0.175	0.118	0.129	0.139	0.134	0.152	0.173	0.14	0.144	0.147	0.158	0.191	0.138	0.148	0.125	0.122	0.114	0.148	0.14	0.119
15.25	0.149	0.158	0.136	0.171	0.144	0.179	0.132	0.147	0.155	0.143	0.124	0.128	0.177	0.13	0.15	0.111	0.121	0.173	0.114	0.127	0.124	0.13	0.15	0.161	0.137	0.141	0.142	0.152	0.178	0.135	0.142	0.12	0.119	0.107	0.14	0.139	0.12
15.5	0.141	0.155	0.14	0.168	0.139	0.174	0.136	0.144	0.151	0.138	0.118	0.137	0.177	0.133	0.145	0.106	0.126	0.157	0.111	0.121	0.125	0.126	0.137	0.154	0.133	0.14	0.137	0.147	0.175	0.125	0.126	0.109	0.117	0.104	0.143	0.132	0.121
15.75	0.134	0.148	0.128	0.166	0.133	0.166	0.134	0.14	0.142	0.131	0.118	0.139	0.172	0.125	0.145	0.097	0.121	0.156	0.112	0.118	0.125	0.127	0.14	0.15	0.122	0.137	0.133	0.145	0.171	0.121	0.14	0.108	0.118	0.104	0.138	0.129	0.105
16	0.132	0.148	0.136	0.158	0.132	0.165	0.13	0.143	0.141	0.127	0.114	0.153	0.159	0.124	0.14	0.098	0.118	0.157	0.108	0.12	0.114	0.118	0.138	0.148	0.116	0.13	0.139	0.139	0.166	0.129	0.133	0.105	0.113	0.1	0.131	0.129	0.1
16.25	0.131	0.156	0.125	0.154	0.134	0.163	0.124	0.131	0.142	0.126	0.106	0.13	0.162	0.124	0.14	0.097	0.114	0.166	0.104	0.118	0.116	0.117	0.128	0.138	0.12	0.124	0.127	0.13	0.166	0.123	0.129	0.106	0.106	0.096	0.127	0.122	0.108
16.5	0.126	0.15	0.121	0.153	0.124	0.161	0.128	0.129	0.137	0.121	0.108	0.125	0.161	0.129	0.138	0.093	0.113	0.164	0.103	0.114	0.112	0.119	0.127	0.132	0.123	0.121	0.118	0.133	0.162	0.119	0.125	0.107	0.101	0.096	0.128	0.116	0.097
16.75	0.121	0.149	0.135	0.152	0.122	0.161	0.124	0.132	0.138	0.114	0.106	0.12	0.15	0.129	0.13	0.099	0.112	0.158	0.104	0.118	0.112	0.109	0.127	0.133	0.129	0.118	0.119	0.139	0.148	0.115	0.126	0.107	0.106	0.093	0.126	0.115	0.103
17	0.118	0.152	0.13	0.149	0.115	0.155	0.117	0.128	0.135	0.12	0.101	0.115	0.156	0.118	0.132	0.097	0.113	0.149	0.102	0.119	0.112	0.111	0.13	0.128	0.117	0.123	0.117	0.135	0.148	0.119	0.133	0.103	0.106	0.092	0.13	0.111	0.106
17.25	0.115	0.146	0.118	0.142	0.11	0.156	0.117	0.127	0.134	0.116	0.106	0.124	0.149	0.119	0.137	0.096	0.114	0.141	0.101	0.111	0.112	0.112	0.124	0.125	0.113	0.122	0.116	0.137	0.152	0.126	0.115	0.104	0.106	0.089	0.129	0.109	0.093
17.5	0.115	0.142	0.123	0.142	0.113	0.147	0.115	0.12	0.132	0.118	0.108	0.124	0.154	0.12	0.128	0.098	0.113	0.142	0.097	0.111	0.107	0.109	0.121	0.125	0.114	0.117	0.122	0.135	0.151	0.12	0.122	0.108	0.103	0.088	0.119	0.107	0.096
17.75	0.12	0.13	0.124	0.142	0.112	0.151	0.116	0.116	0.129	0.118	0.108	0.12	0.159	0.117	0.126	0.094	0.114	0.139	0.101	0.114	0.105	0.11	0.119	0.123	0.122	0.114	0.122	0.134	0.15	0.112	0.121	0.106	0.101	0.091	0.124	0.107	0.102
18	0.116	0.132	0.116	0.143	0.107	0.148	0.113	0.113	0.126	0.114	0.106	0.12	0.154	0.123	0.13	0.093	0.117	0.128	0.1	0.109	0.104	0.105	0.117	0.125	0.124	0.112	0.115	0.126	0.148	0.121	0.122	0.105	0.102	0.088	0.124	0.105	0.083
18.25	0.114	0.123	0.118	0.133	0.105	0.144	0.106	0.109	0.122	0.112	0.103	0.112	0.147	0.123	0.13	0.088	0.117	0.126	0.093	0.11	0.099	0.103	0.117	0.123	0.117	0.109	0.108	0.124	0.144	0.12	0.113	0.103	0.105	0.085	0.12	0.097	0.085
18.5	0.111	0.122	0.109	0.128	0.103	0.143	0.104	0.105	0.121	0.115	0.101	0.114	0.148	0.117	0.127	0.089	0.114	0.132	0.091	0.112	0.099	0.103	0.114	0.121	0.115	0.106	0.109	0.12	0.144	0.104	0.104	0.108	0.099	0.087	0.117	0.098	0.088
18.75	0.107	0.116	0.109	0.128	0.103	0.133	0.101	0.104	0.115	0.117	0.104	0.121	0.147	0.114	0.121	0.092	0.113	0.132	0.091	0.107	0.097	0.101	0.116	0.119	0.112	0.104	0.114	0.117	0.139	0.099	0.106	0.105	0.093	0.084	0.124	0.103	0.083
19	0.103	0.111	0.102	0.123	0.101	0.132	0.098	0.104	0.114	0.109	0.1	0.113	0.147	0.113	0.121	0.089	0.11	0.128	0.09	0.105	0.094	0.098	0.111	0.12	0.117	0.102	0.119	0.121	0.143	0.106	0.108	0.103	0.094	0.082	0.12	0.096	0.092
19.25	0.101	0.108	0.096	0.119	0.095	0.128	0.092	0.098	0.115	0.105	0.094	0.098	0.144	0.111	0.117	0.087	0.112	0.124	0.092	0.104	0.093	0.1	0.11	0.119	0.107	0.097	0.116	0.12	0.141	0.102	0.107	0.103	0.095	0.083	0.119	0.096	0.09
19.5	0.097	0.105	0.097	0.117	0.097	0.12	0.09	0.095	0.113	0.106	0.09	0.104	0.14	0.108	0.119	0.086	0.115	0.115	0.087	0.108	0.085	0.102	0.11	0.117	0.108	0.096	0.105	0.116	0.137	0.1	0.109	0.096	0.09	0.078	0.108	0.096	0.097
19.75	0.096	0.101	0.099	0.115	0.097	0.119	0.086	0.094	0.107	0.103	0.088	0.108	0.139	0.106	0.117	0.083	0.114	0.111	0.088	0.104	0.088	0.093	0.106	0.11	0.101	0.1	0.104	0.111	0.131	0.106	0.106	0.089	0.086	0.077	0.101	0.09	0.088
20	0.093	0.101	0.096	0.112	0.094	0.115	0.082	0.095	0.104	0.099	0.089	0.108	0.142	0.107	0.113	0.084	0.107	0.12	0.085	0.1	0.09	0.091	0.103	0.111	0.102	0.092	0.105	0.11	0.134	0.094	0.104	0.085	0.083	0.081	0.102	0.092	0.088
20.25	0.089	0.096	0.094	0.111	0.091	0.11	0.081	0.095	0.105	0.099	0.087	0.103	0.136	0.108	0.109	0.079	0.1	0.119	0.084	0.096	0.084	0.096	0.1	0.108	0.097	0.091	0.102	0.106	0.129	0.097	0.096	0.087	0.084	0.081	0.104	0.09	0.084
20.5	0.09	0.097	0.102	0.11	0.088	0.112	0.08	0.093	0.105	0.097	0.087	0.101	0.125	0.104	0.107	0.078	0.097	0.116	0.08	0.092	0.08	0.094	0.095	0.105	0.095	0.089	0.1	0.102	0.126	0.096	0.098	0.087	0.083	0.079	0.105	0.09	0.079
20.75	0.09	0.094	0.101	0.106	0.086	0.108	0.079	0.09	0.099	0.091	0.089	0.105	0.126	0.103	0.107	0.084	0.099	0.113	0.082	0.095	0.083	0.093	0.093	0.099	0.097	0.089	0.101	0.105	0.124	0.096	0.093	0.088	0.082	0.075	0.099	0.087	0.085
21	0.091	0.087	0.095	0.105	0.085	0.105	0.078	0.087	0.101	0.089	0.088	0.106	0.13	0.099	0.108	0.084	0.099	0.102	0.081	0.098	0.083	0.086	0.094	0.095	0.094	0.09	0.098	0.099	0.121	0.094	0.095	0.086	0.081	0.071	0.097	0.089	0.097
21.25	0.088	0.089	0.088	0.102	0.081	0.101	0.076	0.084	0.096	0.089	0.085	0.098	0.127	0.091	0.106	0.083	0.094	0.101	0.084	0.093	0.086	0.09	0.09	0.095	0.098	0.091	0.098	0.098	0.116	0.085	0.094	0.079	0.082	0.07	0.1	0.089	0.077
21.5	0.087	0.088	0.093	0.101	0.078	0.102	0.076	0.083	0.094	0.089	0.084	0.098	0.129	0.096	0.104	0.079	0.094	0.102	0.083	0.09	0.084	0.09	0.093	0.094	0.108	0.089	0.091	0.099	0.111	0.086	0.087	0.079	0.083	0.071	0.097	0.083	0.079
21.75	0.086	0.084	0.091	0.099	0.074	0.099	0.075	0.083	0.09	0.086	0.082	0.097	0.126	0.096	0.096	0.074	0.092	0.102	0.083	0.091	0.083	0.081	0.092	0.092	0.097	0.086	0.091	0.097	0.111	0.086	0.09	0.08	0.082	0.073	0.1	0.082	0.077
22	0.086	0.085	0.099	0.1	0.076	0.098	0.075	0.081	0.091	0.084	0.082	0.094	0.12	0.094	0.097	0.08	0.09	0.105	0.081	0.089	0.07	0.078	0.086	0.089	0.092	0.084	0.093	0.099	0.111	0.085	0.084	0.077	0.08	0.068	0.094	0.081	0.061
22.25	0.086	0.086	0.089	0.095	0.079	0.1	0.075	0.079	0.092	0.087	0.081	0.087	0.123	0.097	0.098	0.079	0.091	0.101	0.082	0.087	0.074	0.076	0.085	0.09	0.093	0.085	0.098	0.098	0.106	0.088	0.079	0.077	0.08	0.069	0.094	0.078	0.069
22.5	0.081	0.084	0.088	0.096	0.079	0.098	0.074	0.08	0.088	0.084	0.079	0.09	0.119	0.096	0.1	0.076	0.096	0.103	0.081	0.094	0.074	0.083	0.086	0.089	0.086	0.085	0.096	0.094	0.104	0.088	0.075	0.074	0.076	0.069	0.094	0.082	0.077
22.75	0.08	0.083	0.087	0.096	0.079	0.098	0.072	0.076	0.088	0.081	0.076	0.092	0.112	0.096	0.096	0.074	0.095	0.1	0.081	0.092	0.07	0.086	0.083	0.085	0.091	0.087	0.088	0.093	0.104	0.087	0.073	0.071	0.075	0.066	0.089	0.087	0.063
23	0.081	0.08	0.085	0.092	0.077	0.096	0.071	0.076	0.086	0.08	0.075	0.092	0.11	0.096	0.097	0.073	0.09	0.093	0.081	0.091	0.074	0.084	0.082	0.086	0.092	0.086	0.089	0.092	0.102	0.085	0.081	0.072	0.073	0.065	0.084	0.078	0.062
23.25	0.084	0.085	0.083	0.095	0.074	0.096	0.069	0.076	0.086	0.08	0.078	0.093	0.114	0.093	0.096	0.074	0.09	0.091	0.084	0.088	0.076	0.077	0.081	0.084	0.086	0.081	0.097	0.088	0.101	0.084	0.075	0.07	0.078	0.066	0.087	0.074	0.061
23.5	0.083	0.081	0.088	0.095	0.073	0.093	0.073	0.074	0.084	0.08	0.078	0.088	0.114	0.088	0.096	0.08	0.09	0.094	0.082	0.085	0.075	0.078	0.077	0.084	0.088	0.08	0.093	0.089	0.099	0.08	0.071	0.073	0.077	0.064	0.095	0.076	0.065
23.75	0.078	0.08	0.088	0.089	0.072	0.091	0.073	0.072	0.081	0.08	0.076	0.093	0.118	0.09	0.093	0.072	0.091	0.086	0.081	0.086	0.075	0.08	0.077	0.083	0.082	0.081	0.089	0.091	0.099	0.084	0.078	0.075	0.075	0.061	0.088	0.076	0.06
24	0.081	0.078	0.084	0.09	0.068	0.096	0.071	0.072	0.082	0.078	0.074	0.113	0.116	0.09	0.094	0.074	0.091	0.084	0.084	0.088	0.075	0.076	0.078	0.08	0.085	0.08	0.092	0.088	0.097	0.089	0.08	0.074	0.073	0.061	0.087	0.077	0.06
24.25	0.077	0.081	0.077	0.092	0.07	0.095	0.07	0.072	0.082	0.076	0.072	0.092	0.111	0.087	0.093	0.074	0.087	0.088	0.081	0.083	0.074	0.075	0.078	0.079	0.086	0.077	0.089	0.09	0.095	0.084	0.07	0.069	0.072	0.058	0.085	0.078	0.061
24.5	0.078	0.078	0.076	0.087	0.068	0.094	0.071	0.072	0.084	0.079	0.072	0.082	0.107	0.092	0.093	0.073	0.089	0.085	0.079	0.084	0.072	0.074	0.076	0.081	0.086	0.078	0.095	0.087	0.092	0.08	0.075	0.068	0.075	0.059	0.087	0.076	0.068
24.75	0.08	0.078	0.076	0.088	0.069	0.091	0.069	0.07	0.083	0.079	0.071	0.082	0.109	0.089	0.091	0.072	0.091	0.084	0.077	0.084	0.071	0.076	0.077	0.079	0.08	0.079	0.098	0.088	0.095	0.08	0.081	0.069	0.075	0.061	0.09	0.075	0.067
25	0.077	0.077	0.08	0.089	0.072	0.087	0.065	0.068	0.08	0.077	0.071	0.082	0.106	0.089	0.091	0.07	0.086	0.079	0.081	0.086	0.068	0.078	0.072	0.076	0.083	0.081	0.094	0.082	0.094	0.078	0.07	0.073	0.074	0.061	0.091	0.075	0.07
25.25	0.074	0.078	0.079	0.088	0.069	0.088	0.066	0.067	0.079	0.077	0.072	0.084	0.103	0.088	0.091	0.073	0.089	0.076	0.078	0.086	0.071	0.077	0.073	0.076	0.085	0.078	0.087	0.081	0.095	0.082	0.07	0.072	0.071	0.058	0.088	0.076	0.064
25.5	0.077	0.077	0.08	0.085	0.071	0.09	0.065	0.068	0.077	0.076	0.072	0.085	0.105	0.085	0.088	0.072	0.084	0.078	0.079	0.09	0.068	0.075	0.073	0.074	0.087	0.077	0.085	0.083	0.096	0.08	0.069	0.069	0.073	0.059	0.087	0.078	0.063
25.75	0.075	0.076	0.076	0.084	0.072	0.087	0.066	0.071	0.077	0.075	0.071	0.082	0.106	0.089	0.091	0.07	0.083	0.077	0.084	0.09	0.068	0.075	0.073	0.075	0.082	0.077	0.089	0.084	0.093	0.08	0.063	0.067	0.072	0.058	0.087	0.075	0.069
26	0.077	0.069	0.071	0.082	0.069	0.086	0.064	0.069	0.077	0.075	0.072	0.083	0.103	0.092	0.09	0.072	0.086	0.076	0.085	0.086	0.068	0.073	0.074	0.074	0.081	0.076	0.087	0.087	0.091	0.084	0.07	0.065	0.075	0.058	0.08	0.076	0.077
26.25	0.074	0.068	0.08	0.081	0.066	0.085	0.064	0.067	0.076	0.072	0.071	0.08	0.099	0.094	0.089	0.074	0.086	0.077	0.08	0.088	0.066	0.074	0.075	0.073	0.086	0.074	0.093	0.086	0.096	0.083	0.076	0.065	0.073	0.061	0.083	0.075	0.064
26.5	0.073	0.073	0.081	0.082	0.066	0.082	0.065	0.065	0.076	0.07	0.071	0.078	0.102	0.088	0.092	0.071	0.081	0.075	0.079	0.091	0.065	0.074	0.073	0.071	0.085	0.072	0.093	0.086	0.095	0.078	0.08	0.065	0.069	0.06	0.081	0.069	0.057
26.75	0.071	0.071	0.076	0.079	0.066	0.084	0.064	0.066	0.072	0.072	0.068	0.078	0.103	0.092	0.089	0.068	0.083	0.08	0.081	0.089	0.064	0.072	0.073	0.07	0.084	0.07	0.091	0.083	0.089	0.079	0.076	0.064	0.071	0.058	0.088	0.072	0.054
27	0.07	0.07	0.077	0.079	0.069	0.086	0.064	0.068	0.073	0.075	0.066	0.084	0.105	0.094	0.086	0.07	0.088	0.075	0.077	0.087	0.063	0.076	0.073	0.071	0.082	0.07	0.089	0.084	0.087	0.08	0.071	0.066	0.071	0.06	0.084	0.072	0.06
27.25	0.07	0.068	0.081	0.078	0.071	0.085	0.065	0.067	0.075	0.072	0.069	0.078	0.104	0.094	0.083	0.069	0.088	0.075	0.076	0.084	0.067	0.075	0.073	0.069	0.085	0.071	0.086	0.083	0.088	0.078	0.072	0.067	0.068	0.061	0.078	0.07	0.071
27.5	0.072	0.066	0.081	0.077	0.065	0.083	0.062	0.064	0.073	0.07	0.071	0.078	0.102	0.099	0.085	0.071	0.085	0.072	0.078	0.088	0.066	0.072	0.071	0.067	0.081	0.068	0.093	0.083	0.09	0.084	0.067	0.068	0.066	0.058	0.084	0.069	0.064
27.75	0.07	0.065	0.073	0.077	0.062	0.081	0.064	0.063	0.073	0.07	0.066	0.072	0.102	0.094	0.09	0.07	0.083	0.07	0.079	0.092	0.064	0.069	0.07	0.07	0.083	0.069	0.086	0.082	0.089	0.08	0.07	0.069	0.068	0.055	0.088	0.073	0.059
28	0.07	0.067	0.077	0.073	0.062	0.08	0.065	0.064	0.072	0.072	0.067	0.07	0.097	0.095	0.088	0.066	0.086	0.072	0.079	0.089	0.062	0.073	0.069	0.068	0.081	0.069	0.085	0.082	0.09	0.074	0.067	0.066	0.068	0.055	0.084	0.075	0.062
28.25	0.07	0.063	0.073	0.074	0.059	0.073	0.065	0.063	0.073	0.071	0.068	0.073	0.098	0.096	0.085	0.062	0.087	0.069	0.08	0.092	0.064	0.07	0.07	0.067	0.083	0.069	0.089	0.082	0.092	0.078	0.069	0.066	0.067	0.056	0.083	0.075	0.069
28.5	0.071	0.063	0.071	0.074	0.061	0.074	0.065	0.063	0.071	0.071	0.068	0.076	0.103	0.094	0.084	0.064	0.084	0.065	0.078	0.091	0.065	0.071	0.066	0.068	0.084	0.069	0.084	0.08	0.087	0.078	0.07	0.064	0.068	0.058	0.081	0.07	0.063
28.75	0.069	0.066	0.078	0.077	0.065	0.078	0.061	0.063	0.072	0.07	0.068	0.078	0.1	0.093	0.086	0.068	0.086	0.067	0.078	0.088	0.062	0.07	0.067	0.068	0.081	0.071	0.085	0.079	0.084	0.077	0.063	0.066	0.066	0.057	0.082	0.071	0.057
29	0.069	0.065	0.075	0.073	0.061	0.079	0.059	0.06	0.071	0.07	0.069	0.076	0.093	0.096	0.085	0.067	0.087	0.071	0.073	0.088	0.061	0.071	0.069	0.069	0.084	0.066	0.087	0.08	0.084	0.08	0.063	0.067	0.065	0.057	0.077	0.07	0.055
29.25	0.069	0.064	0.071	0.071	0.061	0.08	0.062	0.061	0.067	0.069	0.067	0.074	0.09	0.102	0.087	0.064	0.091	0.07	0.075	0.082	0.062	0.071	0.068	0.066	0.082	0.068	0.085	0.074	0.081	0.076	0.07	0.067	0.065	0.058	0.077	0.068	0.057
29.5	0.067	0.063	0.071	0.073	0.062	0.079	0.06	0.062	0.069	0.071	0.067	0.077	0.096	0.1	0.085	0.062	0.085	0.065	0.077	0.08	0.064	0.067	0.073	0.066	0.079	0.067	0.084	0.07	0.083	0.074	0.075	0.064	0.068	0.058	0.077	0.07	0.064
29.75	0.064	0.062	0.079	0.072	0.062	0.078	0.062	0.06	0.072	0.072	0.069	0.071	0.091	0.092	0.084	0.064	0.087	0.066	0.07	0.083	0.067	0.069	0.073	0.067	0.079	0.066	0.081	0.072	0.083	0.074	0.068	0.064	0.068	0.056	0.071	0.067	0.057
30	0.063	0.063	0.08	0.07	0.063	0.077	0.062	0.063	0.068	0.069	0.068	0.07	0.09	0.086	0.082	0.067	0.082	0.066	0.068	0.083	0.066	0.07	0.073	0.067	0.077	0.064	0.08	0.072	0.081	0.073	0.068	0.064	0.065	0.056	0.075	0.065	0.056
30.25	0.063	0.062	0.07	0.07	0.061	0.081	0.06	0.061	0.067	0.066	0.065	0.067	0.086	0.089	0.082	0.059	0.079	0.065	0.069	0.082	0.066	0.068	0.071	0.065	0.083	0.065	0.083	0.07	0.078	0.076	0.075	0.062	0.062	0.057	0.07	0.062	0.061
30.5	0.066	0.067	0.061	0.068	0.062	0.078	0.061	0.06	0.068	0.068	0.066	0.07	0.092	0.093	0.081	0.061	0.081	0.066	0.067	0.081	0.061	0.065	0.07	0.066	0.084	0.067	0.081	0.07	0.079	0.075	0.063	0.062	0.063	0.057	0.062	0.063	0.061
30.75	0.068	0.065	0.067	0.068	0.064	0.073	0.061	0.059	0.064	0.066	0.064	0.07	0.093	0.097	0.079	0.06	0.081	0.067	0.068	0.08	0.061	0.069	0.071	0.066	0.087	0.067	0.081	0.068	0.078	0.074	0.064	0.063	0.063	0.054	0.068	0.062	0.055
31	0.067	0.064	0.065	0.066	0.063	0.076	0.061	0.062	0.067	0.067	0.065	0.071	0.085	0.091	0.081	0.062	0.081	0.064	0.066	0.079	0.062	0.064	0.072	0.065	0.083	0.065	0.079	0.067	0.075	0.075	0.067	0.061	0.061	0.054	0.076	0.062	0.063
31.25	0.067	0.064	0.07	0.068	0.057	0.076	0.062	0.061	0.065	0.068	0.069	0.071	0.084	0.094	0.08	0.059	0.081	0.063	0.064	0.078	0.064	0.064	0.071	0.063	0.078	0.066	0.077	0.068	0.075	0.073	0.066	0.058	0.065	0.056	0.074	0.063	0.062
31.5	0.066	0.062	0.075	0.07	0.061	0.075	0.062	0.06	0.066	0.069	0.068	0.069	0.083	0.095	0.078	0.055	0.081	0.063	0.065	0.079	0.063	0.063	0.072	0.063	0.08	0.066	0.076	0.064	0.075	0.076	0.073	0.058	0.062	0.051	0.066	0.064	0.059
31.75	0.065	0.062	0.072	0.07	0.063	0.075	0.059	0.061	0.068	0.067	0.068	0.073	0.08	0.093	0.081	0.055	0.079	0.064	0.065	0.075	0.063	0.066	0.07	0.063	0.074	0.065	0.079	0.064	0.075	0.08	0.076	0.059	0.061	0.052	0.068	0.064	0.058
32	0.065	0.062	0.069	0.071	0.063	0.074	0.061	0.062	0.067	0.067	0.068	0.1	0.083	0.092	0.086	0.055	0.078	0.067	0.067	0.075	0.067	0.065	0.07	0.063	0.079	0.067	0.087	0.064	0.075	0.089	0.071	0.062	0.06	0.051	0.067	0.067	0.062
32.25	0.068	0.063	0.071	0.069	0.063	0.076	0.061	0.06	0.064	0.065	0.066	0.071	0.079	0.092	0.078	0.057	0.081	0.062	0.063	0.075	0.062	0.064	0.072	0.061	0.084	0.066	0.078	0.063	0.077	0.073	0.058	0.06	0.059	0.049	0.068	0.062	0.069
32.5	0.066	0.061	0.067	0.07	0.061	0.074	0.059	0.06	0.064	0.065	0.067	0.066	0.08	0.089	0.076	0.057	0.078	0.063	0.064	0.074	0.062	0.063	0.072	0.062	0.085	0.065	0.075	0.064	0.073	0.068	0.058	0.06	0.059	0.048	0.067	0.058	0.056
32.75	0.067	0.06	0.07	0.067	0.065	0.075	0.064	0.058	0.066	0.067	0.064	0.066	0.076	0.091	0.077	0.057	0.076	0.066	0.063	0.076	0.066	0.066	0.071	0.062	0.083	0.064	0.074	0.064	0.072	0.068	0.056	0.059	0.058	0.049	0.069	0.059	0.053
33	0.066	0.064	0.07	0.066	0.065	0.074	0.064	0.056	0.067	0.068	0.065	0.067	0.074	0.091	0.076	0.056	0.079	0.068	0.066	0.078	0.062	0.062	0.07	0.061	0.088	0.064	0.075	0.065	0.072	0.075	0.054	0.057	0.057	0.051	0.068	0.061	0.054
33.25	0.065	0.061	0.068	0.068	0.061	0.074	0.062	0.057	0.067	0.064	0.065	0.063	0.077	0.082	0.074	0.056	0.073	0.062	0.06	0.073	0.062	0.061	0.069	0.062	0.089	0.062	0.074	0.065	0.069	0.077	0.06	0.056	0.059	0.049	0.069	0.06	0.058
33.5	0.065	0.063	0.07	0.067	0.06	0.077	0.062	0.059	0.064	0.065	0.066	0.061	0.074	0.081	0.073	0.055	0.079	0.06	0.067	0.073	0.064	0.063	0.069	0.062	0.085	0.061	0.071	0.065	0.069	0.071	0.06	0.058	0.058	0.05	0.069	0.058	0.06
33.75	0.065	0.064	0.073	0.068	0.06	0.076	0.06	0.061	0.065	0.066	0.066	0.06	0.073	0.087	0.074	0.057	0.077	0.067	0.064	0.075	0.062	0.064	0.071	0.063	0.084	0.065	0.075	0.061	0.069	0.071	0.061	0.056	0.058	0.047	0.071	0.057	0.057
34	0.064	0.062	0.069	0.069	0.061	0.08	0.06	0.059	0.061	0.064	0.065	0.063	0.076	0.086	0.073	0.059	0.076	0.066	0.062	0.074	0.06	0.061	0.068	0.063	0.082	0.064	0.071	0.061	0.068	0.07	0.053	0.056	0.059	0.05	0.063	0.057	0.052
34.25	0.067	0.063	0.073	0.068	0.06	0.077	0.06	0.062	0.061	0.065	0.063	0.066	0.079	0.085	0.075	0.057	0.077	0.06	0.065	0.071	0.062	0.061	0.068	0.061	0.086	0.064	0.076	0.061	0.066	0.072	0.057	0.057	0.056	0.046	0.066	0.058	0.06
34.5	0.067	0.06	0.07	0.067	0.061	0.074	0.062	0.058	0.065	0.067	0.063	0.063	0.079	0.088	0.073	0.057	0.077	0.061	0.065	0.07	0.062	0.062	0.071	0.06	0.09	0.063	0.076	0.06	0.066	0.07	0.06	0.056	0.054	0.044	0.065	0.054	0.061
34.75	0.067	0.063	0.069	0.067	0.061	0.075	0.064	0.055	0.063	0.064	0.062	0.06	0.076	0.088	0.072	0.056	0.077	0.06	0.064	0.073	0.06	0.063	0.066	0.06	0.089	0.062	0.068	0.06	0.067	0.07	0.062	0.058	0.056	0.044	0.064	0.055	0.052
35	0.068	0.062	0.069	0.068	0.061	0.075	0.066	0.056	0.064	0.064	0.066	0.063	0.077	0.089	0.073	0.054	0.078	0.062	0.064	0.073	0.063	0.062	0.068	0.06	0.084	0.064	0.066	0.063	0.066	0.075	0.061	0.056	0.054	0.047	0.066	0.056	0.052
35.25	0.067	0.062	0.067	0.066	0.064	0.075	0.061	0.059	0.065	0.068	0.064	0.061	0.076	0.087	0.072	0.054	0.077	0.061	0.062	0.069	0.062	0.058	0.068	0.058	0.088	0.065	0.071	0.062	0.064	0.074	0.062	0.057	0.055	0.047	0.061	0.053	0.062
35.5	0.066	0.064	0.067	0.067	0.064	0.075	0.062	0.061	0.065	0.068	0.062	0.06	0.075	0.085	0.072	0.055	0.077	0.062	0.062	0.071	0.06	0.059	0.068	0.059	0.089	0.064	0.071	0.062	0.063	0.07	0.063	0.057	0.055	0.043	0.06	0.054	0.061
35.75	0.065	0.061	0.064	0.066	0.062	0.076	0.061	0.06	0.064	0.068	0.062	0.06	0.075	0.08	0.072	0.055	0.077	0.065	0.063	0.072	0.059	0.059	0.069	0.06	0.087	0.062	0.069	0.061	0.065	0.07	0.058	0.056	0.055	0.043	0.063	0.054	0.053
36	0.067	0.06	0.063	0.069	0.065	0.078	0.059	0.059	0.063	0.067	0.064	0.057	0.075	0.079	0.072	0.056	0.075	0.067	0.064	0.071	0.06	0.059	0.07	0.06	0.086	0.061	0.068	0.059	0.066	0.072	0.053	0.055	0.055	0.042	0.066	0.053	0.052
36.25	0.068	0.061	0.061	0.067	0.064	0.077	0.059	0.058	0.063	0.066	0.064	0.057	0.076	0.08	0.072	0.055	0.073	0.061	0.061	0.07	0.06	0.061	0.071	0.059	0.087	0.062	0.068	0.056	0.064	0.07	0.056	0.055	0.055	0.042	0.064	0.051	0.041
36.5	0.068	0.061	0.073	0.064	0.063	0.078	0.06	0.058	0.062	0.069	0.063	0.059	0.073	0.082	0.07	0.052	0.076	0.061	0.06	0.075	0.061	0.059	0.07	0.059	0.087	0.063	0.071	0.057	0.06	0.069	0.06	0.057	0.055	0.043	0.059	0.049	0.047
36.75	0.066	0.062	0.073	0.067	0.063	0.075	0.061	0.058	0.064	0.068	0.061	0.058	0.074	0.08	0.07	0.053	0.079	0.062	0.061	0.077	0.065	0.057	0.071	0.06	0.086	0.061	0.067	0.057	0.057	0.067	0.059	0.053	0.055	0.043	0.063	0.05	0.05
37	0.069	0.066	0.072	0.066	0.061	0.075	0.061	0.057	0.064	0.067	0.061	0.057	0.075	0.077	0.07	0.051	0.077	0.061	0.062	0.076	0.063	0.057	0.07	0.06	0.082	0.064	0.071	0.055	0.06	0.069	0.057	0.053	0.054	0.041	0.062	0.049	0.046
37.25	0.066	0.067	0.07	0.069	0.063	0.075	0.062	0.06	0.062	0.065	0.063	0.056	0.071	0.076	0.072	0.053	0.075	0.062	0.062	0.075	0.061	0.06	0.068	0.059	0.084	0.062	0.065	0.055	0.061	0.072	0.051	0.056	0.055	0.04	0.063	0.048	0.047
37.5	0.063	0.066	0.071	0.069	0.061	0.077	0.061	0.061	0.06	0.063	0.064	0.056	0.069	0.075	0.069	0.05	0.071	0.057	0.061	0.073	0.064	0.063	0.068	0.061	0.082	0.06	0.064	0.054	0.06	0.073	0.048	0.056	0.053	0.04	0.059	0.047	0.048
37.75	0.067	0.064	0.066	0.07	0.063	0.079	0.063	0.06	0.06	0.062	0.064	0.06	0.074	0.073	0.071	0.054	0.076	0.057	0.061	0.07	0.062	0.059	0.072	0.061	0.088	0.06	0.066	0.054	0.06	0.074	0.053	0.054	0.053	0.04	0.061	0.047	0.044
38	0.068	0.065	0.067	0.07	0.063	0.078	0.063	0.059	0.062	0.064	0.061	0.059	0.072	0.072	0.069	0.052	0.074	0.056	0.061	0.075	0.058	0.055	0.068	0.06	0.089	0.061	0.061	0.055	0.059	0.066	0.048	0.052	0.052	0.039	0.061	0.046	0.042
38.25	0.067	0.064	0.069	0.067	0.066	0.079	0.061	0.058	0.062	0.067	0.061	0.055	0.069	0.071	0.071	0.049	0.077	0.055	0.058	0.074	0.059	0.057	0.07	0.058	0.088	0.061	0.062	0.054	0.058	0.065	0.046	0.053	0.052	0.039	0.055	0.046	0.059
38.5	0.067	0.064	0.065	0.065	0.066	0.08	0.06	0.057	0.062	0.067	0.061	0.056	0.071	0.073	0.069	0.051	0.075	0.056	0.059	0.073	0.062	0.054	0.069	0.057	0.09	0.06	0.06	0.054	0.059	0.065	0.049	0.054	0.051	0.039	0.054	0.046	0.056
38.75	0.067	0.062	0.069	0.064	0.062	0.079	0.061	0.058	0.062	0.066	0.059	0.058	0.071	0.072	0.069	0.052	0.069	0.056	0.06	0.074	0.064	0.053	0.068	0.057	0.092	0.061	0.06	0.053	0.059	0.064	0.046	0.05	0.051	0.037	0.057	0.045	0.05
39	0.068	0.061	0.069	0.066	0.063	0.077	0.061	0.056	0.063	0.064	0.061	0.056	0.07	0.07	0.068	0.049	0.071	0.057	0.059	0.07	0.061	0.053	0.07	0.058	0.09	0.063	0.06	0.05	0.06	0.067	0.048	0.053	0.049	0.036	0.059	0.044	0.051
39.25	0.069	0.065	0.069	0.068	0.065	0.078	0.062	0.056	0.059	0.065	0.059	0.055	0.066	0.067	0.065	0.048	0.072	0.054	0.055	0.068	0.065	0.057	0.071	0.056	0.091	0.06	0.058	0.049	0.058	0.066	0.052	0.052	0.048	0.037	0.054	0.044	0.052
39.5	0.068	0.064	0.066	0.067	0.065	0.079	0.061	0.058	0.06	0.064	0.058	0.052	0.067	0.064	0.066	0.048	0.074	0.052	0.058	0.07	0.061	0.06	0.07	0.057	0.096	0.061	0.059	0.049	0.058	0.064	0.05	0.052	0.049	0.036	0.054	0.045	0.047
39.75	0.068	0.065	0.065	0.068	0.066	0.08	0.062	0.054	0.059	0.064	0.058	0.053	0.068	0.065	0.067	0.051	0.078	0.051	0.056	0.068	0.059	0.058	0.07	0.058	0.091	0.06	0.059	0.05	0.059	0.067	0.046	0.052	0.046	0.036	0.057	0.042	0.046
40	0.067	0.067	0.063	0.065	0.064	0.079	0.062	0.055	0.06	0.065	0.056	0.058	0.07	0.06	0.068	0.049	0.073	0.051	0.056	0.069	0.06	0.056	0.07	0.059	0.093	0.059	0.058	0.048	0.055	0.069	0.043	0.051	0.048	0.034	0.054	0.041	0.047
40.25	0.064	0.067	0.059	0.067	0.065	0.077	0.063	0.056	0.06	0.068	0.056	0.053	0.071	0.063	0.065	0.047	0.073	0.051	0.056	0.069	0.061	0.057	0.069	0.057	0.092	0.057	0.056	0.047	0.056	0.068	0.049	0.049	0.046	0.036	0.052	0.04	0.048
40.5	0.07	0.065	0.06	0.067	0.063	0.073	0.063	0.06	0.058	0.068	0.057	0.05	0.069	0.061	0.063	0.048	0.076	0.051	0.057	0.068	0.059	0.058	0.069	0.056	0.091	0.059	0.059	0.046	0.057	0.067	0.044	0.051	0.046	0.036	0.052	0.04	0.045
40.75	0.069	0.068	0.056	0.066	0.062	0.073	0.062	0.059	0.062	0.065	0.057	0.051	0.062	0.059	0.063	0.047	0.072	0.051	0.056	0.066	0.061	0.058	0.067	0.055	0.089	0.06	0.057	0.045	0.057	0.061	0.043	0.05	0.049	0.035	0.05	0.04	0.04
41	0.071	0.067	0.054	0.067	0.062	0.075	0.061	0.061	0.061	0.067	0.055	0.05	0.063	0.057	0.065	0.048	0.07	0.051	0.055	0.069	0.056	0.054	0.066	0.057	0.093	0.058	0.054	0.047	0.054	0.062	0.045	0.05	0.046	0.033	0.05	0.041	0.037
41.25	0.068	0.067	0.063	0.065	0.062	0.072	0.061	0.06	0.059	0.066	0.055	0.052	0.066	0.055	0.062	0.047	0.067	0.049	0.056	0.07	0.058	0.054	0.067	0.056	0.094	0.057	0.057	0.044	0.054	0.064	0.041	0.05	0.047	0.031	0.054	0.039	0.036
41.5	0.066	0.064	0.066	0.067	0.064	0.073	0.063	0.057	0.058	0.067	0.053	0.05	0.066	0.058	0.061	0.048	0.067	0.048	0.054	0.069	0.062	0.053	0.067	0.058	0.096	0.058	0.053	0.042	0.053	0.063	0.041	0.049	0.048	0.032	0.054	0.039	0.044
41.75	0.067	0.064	0.063	0.068	0.064	0.078	0.064	0.056	0.06	0.069	0.054	0.053	0.067	0.057	0.062	0.045	0.069	0.047	0.054	0.067	0.065	0.053	0.068	0.057	0.097	0.058	0.054	0.04	0.052	0.071	0.037	0.049	0.046	0.032	0.051	0.038	0.04
42	0.07	0.066	0.065	0.066	0.067	0.078	0.06	0.056	0.06	0.066	0.054	0.074	0.068	0.059	0.063	0.047	0.071	0.045	0.054	0.07	0.063	0.053	0.065	0.058	0.096	0.057	0.054	0.042	0.054	0.082	0.041	0.047	0.045	0.031	0.048	0.038	0.044
42.25	0.071	0.069	0.064	0.064	0.069	0.08	0.063	0.055	0.06	0.063	0.052	0.055	0.063	0.057	0.061	0.048	0.067	0.046	0.055	0.068	0.063	0.053	0.065	0.059	0.095	0.058	0.052	0.042	0.053	0.067	0.042	0.047	0.045	0.032	0.048	0.037	0.038
42.5	0.069	0.066	0.066	0.063	0.07	0.078	0.064	0.057	0.06	0.067	0.054	0.049	0.064	0.057	0.059	0.045	0.068	0.047	0.052	0.067	0.061	0.051	0.066	0.058	0.09	0.06	0.051	0.043	0.052	0.062	0.038	0.047	0.046	0.031	0.047	0.037	0.041
42.75	0.069	0.067	0.069	0.065	0.065	0.074	0.065	0.057	0.06	0.064	0.053	0.049	0.062	0.056	0.058	0.046	0.065	0.049	0.051	0.065	0.06	0.05	0.067	0.054	0.089	0.059	0.054	0.043	0.051	0.063	0.039	0.047	0.044	0.03	0.049	0.036	0.04
43	0.069	0.069	0.076	0.068	0.064	0.072	0.062	0.055	0.059	0.065	0.052	0.049	0.064	0.055	0.059	0.047	0.063	0.046	0.051	0.063	0.057	0.051	0.066	0.056	0.093	0.059	0.053	0.041	0.049	0.063	0.043	0.045	0.044	0.029	0.047	0.036	0.042
43.25	0.066	0.068	0.075	0.067	0.065	0.077	0.061	0.055	0.059	0.065	0.05	0.049	0.062	0.055	0.056	0.048	0.064	0.051	0.05	0.064	0.057	0.05	0.066	0.055	0.099	0.057	0.051	0.041	0.047	0.061	0.038	0.046	0.041	0.029	0.046	0.035	0.046
43.5	0.065	0.067	0.068	0.067	0.065	0.079	0.065	0.057	0.057	0.067	0.049	0.049	0.061	0.052	0.055	0.046	0.065	0.047	0.05	0.065	0.058	0.049	0.063	0.054	0.1	0.057	0.05	0.041	0.049	0.059	0.037	0.045	0.042	0.029	0.05	0.036	0.039
43.75	0.066	0.068	0.064	0.065	0.062	0.078	0.065	0.059	0.058	0.065	0.051	0.047	0.062	0.053	0.058	0.044	0.066	0.045	0.05	0.062	0.057	0.048	0.063	0.054	0.097	0.056	0.048	0.039	0.05	0.061	0.036	0.046	0.042	0.029	0.049	0.037	0.037
44	0.068	0.067	0.061	0.065	0.064	0.079	0.066	0.057	0.058	0.064	0.051	0.046	0.06	0.053	0.057	0.041	0.061	0.044	0.052	0.065	0.055	0.05	0.064	0.054	0.095	0.056	0.052	0.039	0.049	0.061	0.037	0.046	0.042	0.03	0.047	0.036	0.036
44.25	0.069	0.064	0.058	0.063	0.063	0.075	0.065	0.057	0.057	0.065	0.048	0.048	0.058	0.051	0.055	0.044	0.062	0.047	0.05	0.064	0.059	0.049	0.066	0.054	0.104	0.059	0.053	0.039	0.048	0.062	0.038	0.044	0.042	0.028	0.048	0.037	0.036
44.5	0.07	0.066	0.063	0.064	0.064	0.079	0.065	0.056	0.058	0.064	0.048	0.045	0.057	0.051	0.056	0.045	0.064	0.045	0.049	0.061	0.059	0.049	0.066	0.055	0.102	0.06	0.05	0.04	0.046	0.061	0.037	0.044	0.042	0.027	0.048	0.037	0.038
44.75	0.069	0.064	0.066	0.066	0.063	0.079	0.065	0.058	0.057	0.066	0.047	0.044	0.059	0.051	0.055	0.045	0.064	0.043	0.05	0.063	0.06	0.047	0.062	0.056	0.103	0.057	0.047	0.038	0.046	0.058	0.035	0.044	0.048	0.029	0.045	0.035	0.037
45	0.069	0.064	0.068	0.067	0.061	0.074	0.066	0.057	0.057	0.065	0.047	0.043	0.114	0.05	0.053	0.045	0.065	0.047	0.049	0.062	0.059	0.049	0.06	0.056	0.104	0.056	0.048	0.037	0.046	0.059	0.037	0.043	0.064	0.029	0.042	0.035	0.033
55	0.058	0.063	0.059	0.052	0.053	0.065	0.063	0.048	0.046	0.062	0.036	0.039	0.051	0.04	0.042	0.038	0.056	0.041	0.045	0.052	0.05	0.037	0.048	0.044	0.091	0.053	0.042	0.033	0.037	0.056	0.034	0.035	0.034	0.022	0.034	0.027	0.026
55.25	0.058	0.062	0.054	0.053	0.054	0.066	0.062	0.046	0.046	0.061	0.036	0.038	0.051	0.039	0.042	0.037	0.056	0.039	0.043	0.051	0.05	0.037	0.048	0.045	0.089	0.052	0.043	0.033	0.037	0.053	0.035	0.036	0.033	0.022	0.035	0.027	0.025
55.5	0.057	0.063	0.052	0.054	0.053	0.069	0.061	0.049	0.046	0.06	0.036	0.038	0.052	0.038	0.041	0.04	0.053	0.041	0.043	0.054	0.051	0.036	0.049	0.044	0.082	0.049	0.043	0.034	0.038	0.054	0.031	0.032	0.032	0.022	0.038	0.029	0.023
55.75	0.057	0.065	0.053	0.053	0.052	0.069	0.059	0.05	0.045	0.063	0.036	0.038	0.051	0.039	0.04	0.038	0.054	0.041	0.043	0.053	0.051	0.034	0.049	0.042	0.084	0.05	0.04	0.033	0.037	0.053	0.03	0.033	0.034	0.022	0.038	0.029	0.024
56	0.056	0.065	0.055	0.052	0.051	0.067	0.059	0.048	0.046	0.061	0.036	0.037	0.051	0.036	0.04	0.036	0.052	0.039	0.044	0.053	0.049	0.036	0.048	0.044	0.08	0.05	0.042	0.033	0.037	0.053	0.031	0.033	0.033	0.023	0.037	0.027	0.027
56.25	0.055	0.064	0.056	0.053	0.052	0.064	0.061	0.046	0.043	0.062	0.036	0.037	0.05	0.04	0.041	0.037	0.056	0.04	0.044	0.054	0.046	0.036	0.045	0.044	0.084	0.052	0.041	0.032	0.036	0.053	0.028	0.033	0.033	0.022	0.036	0.028	0.026
56.5	0.055	0.063	0.054	0.053	0.053	0.065	0.061	0.048	0.043	0.063	0.036	0.037	0.05	0.041	0.041	0.037	0.055	0.041	0.042	0.056	0.045	0.035	0.047	0.044	0.084	0.051	0.04	0.033	0.037	0.052	0.03	0.032	0.034	0.022	0.037	0.027	0.026
56.75	0.055	0.062	0.051	0.053	0.052	0.067	0.06	0.049	0.045	0.062	0.035	0.036	0.054	0.04	0.039	0.037	0.058	0.042	0.043	0.054	0.046	0.034	0.049	0.044	0.081	0.051	0.042	0.033	0.037	0.053	0.027	0.033	0.033	0.022	0.035	0.026	0.023
57	0.054	0.061	0.054	0.052	0.053	0.067	0.061	0.047	0.046	0.062	0.034	0.036	0.057	0.039	0.038	0.036	0.055	0.041	0.044	0.053	0.049	0.034	0.048	0.043	0.082	0.053	0.039	0.032	0.037	0.055	0.03	0.031	0.033	0.021	0.034	0.025	0.023
57.25	0.055	0.061	0.052	0.053	0.053	0.066	0.059	0.048	0.044	0.061	0.035	0.036	0.055	0.041	0.039	0.037	0.057	0.041	0.044	0.053	0.048	0.034	0.047	0.043	0.082	0.053	0.039	0.032	0.038	0.055	0.03	0.032	0.032	0.022	0.035	0.026	0.022
57.5	0.052	0.065	0.054	0.051	0.053	0.064	0.059	0.047	0.045	0.06	0.035	0.037	0.05	0.041	0.038	0.036	0.055	0.04	0.043	0.053	0.047	0.033	0.047	0.043	0.082	0.053	0.039	0.031	0.038	0.054	0.031	0.031	0.032	0.022	0.035	0.025	0.025
57.75	0.053	0.065	0.054	0.049	0.051	0.065	0.061	0.046	0.043	0.062	0.035	0.041	0.05	0.042	0.038	0.037	0.057	0.039	0.041	0.054	0.046	0.034	0.045	0.043	0.086	0.051	0.038	0.032	0.036	0.057	0.028	0.032	0.032	0.021	0.035	0.026	0.028
58	0.053	0.064	0.056	0.051	0.051	0.066	0.061	0.047	0.043	0.062	0.035	0.053	0.049	0.043	0.039	0.037	0.056	0.04	0.044	0.056	0.045	0.034	0.048	0.045	0.082	0.051	0.038	0.032	0.036	0.069	0.03	0.032	0.033	0.02	0.033	0.026	0.027
58.25	0.052	0.061	0.054	0.05	0.052	0.064	0.057	0.047	0.043	0.062	0.032	0.043	0.05	0.04	0.038	0.036	0.057	0.038	0.045	0.053	0.046	0.035	0.048	0.043	0.084	0.05	0.039	0.03	0.037	0.057	0.032	0.032	0.033	0.02	0.035	0.025	0.024
58.5	0.051	0.059	0.052	0.049	0.05	0.065	0.059	0.048	0.043	0.064	0.032	0.039	0.048	0.041	0.037	0.036	0.054	0.038	0.044	0.054	0.046	0.034	0.048	0.042	0.084	0.052	0.038	0.03	0.037	0.052	0.033	0.032	0.033	0.02	0.036	0.025	0.026
58.75	0.052	0.062	0.057	0.049	0.051	0.065	0.058	0.048	0.043	0.064	0.032	0.035	0.047	0.039	0.036	0.034	0.054	0.039	0.042	0.053	0.043	0.033	0.048	0.043	0.083	0.049	0.039	0.031	0.036	0.053	0.036	0.03	0.033	0.02	0.036	0.024	0.024
59	0.054	0.062	0.057	0.047	0.053	0.063	0.058	0.047	0.044	0.064	0.033	0.034	0.049	0.039	0.038	0.035	0.054	0.037	0.043	0.051	0.047	0.034	0.047	0.044	0.08	0.049	0.039	0.032	0.035	0.051	0.03	0.031	0.031	0.02	0.036	0.024	0.024
59.25	0.054	0.062	0.053	0.048	0.052	0.064	0.058	0.047	0.043	0.062	0.032	0.034	0.05	0.041	0.035	0.034	0.055	0.037	0.045	0.054	0.046	0.035	0.045	0.044	0.076	0.05	0.039	0.032	0.036	0.052	0.028	0.031	0.033	0.021	0.033	0.025	0.024
59.5	0.054	0.063	0.06	0.05	0.05	0.061	0.059	0.045	0.041	0.061	0.031	0.034	0.049	0.039	0.036	0.033	0.053	0.035	0.044	0.055	0.046	0.034	0.046	0.043	0.077	0.05	0.039	0.032	0.037	0.052	0.029	0.031	0.031	0.021	0.033	0.024	0.025
59.75	0.054	0.062	0.056	0.049	0.051	0.065	0.06	0.045	0.041	0.061	0.031	0.034	0.049	0.037	0.036	0.034	0.054	0.039	0.042	0.053	0.045	0.035	0.046	0.043	0.081	0.049	0.041	0.031	0.037	0.055	0.028	0.03	0.031	0.02	0.033	0.024	0.023
60	0.054	0.061	0.055	0.048	0.051	0.066	0.057	0.046	0.041	0.063	0.032	0.038	0.051	0.039	0.034	0.034	0.059	0.041	0.042	0.05	0.045	0.034	0.046	0.043	0.084	0.05	0.039	0.031	0.035	0.055	0.029	0.03	0.031	0.02	0.034	0.025	0.023
60.25	0.053	0.062	0.051	0.049	0.051	0.065	0.061	0.046	0.041	0.063	0.031	0.036	0.05	0.038	0.034	0.033	0.055	0.037	0.045	0.053	0.043	0.032	0.046	0.043	0.079	0.051	0.04	0.031	0.034	0.053	0.027	0.029	0.031	0.019	0.035	0.024	0.025
60.5	0.052	0.064	0.049	0.049	0.049	0.063	0.058	0.046	0.041	0.061	0.031	0.035	0.048	0.037	0.034	0.032	0.055	0.036	0.044	0.049	0.044	0.032	0.046	0.043	0.069	0.05	0.04	0.031	0.035	0.051	0.03	0.027	0.031	0.019	0.034	0.023	0.022
60.75	0.051	0.064	0.051	0.048	0.05	0.063	0.056	0.045	0.041	0.064	0.029	0.033	0.047	0.039	0.035	0.033	0.052	0.036	0.042	0.049	0.045	0.031	0.048	0.042	0.071	0.049	0.04	0.03	0.036	0.052	0.029	0.027	0.032	0.019	0.035	0.023	0.022
61	0.05	0.06	0.053	0.047	0.05	0.062	0.056	0.047	0.042	0.063	0.029	0.034	0.049	0.043	0.035	0.034	0.051	0.036	0.041	0.054	0.045	0.031	0.047	0.042	0.076	0.048	0.04	0.032	0.036	0.051	0.029	0.029	0.031	0.019	0.031	0.024	0.025
61.25	0.049	0.059	0.05	0.047	0.049	0.064	0.055	0.046	0.041	0.064	0.03	0.034	0.048	0.042	0.033	0.033	0.052	0.036	0.041	0.051	0.042	0.03	0.046	0.042	0.076	0.048	0.038	0.032	0.036	0.052	0.029	0.029	0.031	0.02	0.032	0.025	0.022
61.5	0.049	0.061	0.051	0.046	0.048	0.065	0.055	0.045	0.039	0.063	0.031	0.033	0.049	0.038	0.034	0.034	0.055	0.034	0.044	0.048	0.043	0.031	0.047	0.042	0.076	0.047	0.037	0.031	0.036	0.052	0.028	0.028	0.03	0.02	0.031	0.024	0.024
61.75	0.05	0.061	0.05	0.044	0.046	0.065	0.053	0.048	0.04	0.059	0.03	0.03	0.048	0.037	0.034	0.032	0.053	0.036	0.043	0.052	0.043	0.031	0.047	0.042	0.074	0.047	0.04	0.031	0.036	0.049	0.028	0.027	0.03	0.019	0.03	0.023	0.025
62	0.049	0.06	0.048	0.042	0.047	0.061	0.054	0.045	0.041	0.062	0.029	0.033	0.046	0.038	0.033	0.034	0.053	0.036	0.045	0.052	0.043	0.032	0.044	0.042	0.077	0.049	0.038	0.03	0.035	0.049	0.027	0.026	0.03	0.02	0.03	0.023	0.024
62.25	0.049	0.059	0.054	0.044	0.048	0.059	0.056	0.045	0.04	0.064	0.03	0.033	0.045	0.037	0.032	0.033	0.055	0.035	0.044	0.052	0.042	0.031	0.046	0.042	0.078	0.049	0.037	0.029	0.035	0.05	0.03	0.026	0.029	0.02	0.03	0.023	0.02
62.5	0.05	0.057	0.054	0.043	0.047	0.06	0.055	0.043	0.04	0.063	0.029	0.034	0.047	0.038	0.032	0.033	0.054	0.035	0.043	0.05	0.043	0.031	0.047	0.042	0.074	0.049	0.035	0.031	0.035	0.048	0.03	0.027	0.029	0.019	0.031	0.023	0.019
62.75	0.048	0.059	0.047	0.043	0.044	0.062	0.053	0.044	0.039	0.062	0.028	0.033	0.048	0.037	0.032	0.032	0.052	0.036	0.042	0.05	0.043	0.03	0.046	0.042	0.072	0.047	0.035	0.03	0.034	0.05	0.027	0.028	0.029	0.018	0.03	0.024	0.02
63	0.046	0.06	0.049	0.043	0.047	0.062	0.056	0.043	0.04	0.063	0.028	0.032	0.046	0.037	0.031	0.031	0.053	0.036	0.044	0.051	0.04	0.03	0.046	0.041	0.076	0.047	0.037	0.029	0.034	0.047	0.028	0.028	0.029	0.019	0.029	0.023	0.019
63.25	0.048	0.058	0.048	0.045	0.047	0.061	0.055	0.043	0.039	0.062	0.028	0.031	0.048	0.038	0.031	0.03	0.053	0.036	0.042	0.05	0.042	0.031	0.044	0.041	0.079	0.048	0.038	0.029	0.033	0.048	0.026	0.027	0.029	0.018	0.028	0.021	0.02
63.5	0.048	0.057	0.048	0.044	0.047	0.059	0.054	0.042	0.04	0.062	0.029	0.031	0.05	0.037	0.031	0.031	0.053	0.035	0.039	0.05	0.042	0.03	0.044	0.04	0.079	0.046	0.038	0.03	0.035	0.048	0.028	0.027	0.028	0.018	0.028	0.02	0.02
63.75	0.046	0.058	0.047	0.042	0.044	0.06	0.054	0.042	0.04	0.06	0.028	0.032	0.047	0.039	0.032	0.031	0.053	0.034	0.04	0.049	0.042	0.027	0.044	0.04	0.074	0.048	0.038	0.031	0.035	0.047	0.031	0.026	0.028	0.018	0.029	0.021	0.022
64	0.047	0.056	0.047	0.042	0.044	0.061	0.056	0.044	0.041	0.061	0.029	0.036	0.048	0.036	0.031	0.031	0.053	0.034	0.041	0.05	0.043	0.028	0.043	0.041	0.073	0.046	0.036	0.03	0.033	0.047	0.028	0.026	0.027	0.018	0.03	0.022	0.021
64.25	0.048	0.059	0.048	0.04	0.045	0.06	0.053	0.042	0.04	0.063	0.028	0.033	0.049	0.034	0.031	0.03	0.053	0.033	0.04	0.051	0.041	0.028	0.045	0.041	0.073	0.046	0.037	0.029	0.033	0.046	0.027	0.026	0.027	0.017	0.028	0.021	0.021
64.5	0.045	0.059	0.049	0.041	0.045	0.058	0.051	0.041	0.039	0.063	0.028	0.032	0.047	0.036	0.029	0.028	0.053	0.031	0.039	0.048	0.04	0.027	0.043	0.041	0.07	0.047	0.037	0.029	0.033	0.046	0.028	0.026	0.026	0.018	0.028	0.02	0.022
64.75	0.046	0.057	0.047	0.042	0.045	0.057	0.052	0.041	0.037	0.062	0.027	0.03	0.045	0.035	0.029	0.029	0.051	0.033	0.039	0.049	0.039	0.027	0.044	0.039	0.071	0.047	0.037	0.03	0.033	0.047	0.026	0.025	0.025	0.017	0.027	0.021	0.02
65	0.045	0.055	0.048	0.043	0.043	0.057	0.055	0.04	0.037	0.06	0.027	0.031	0.045	0.035	0.029	0.029	0.053	0.032	0.04	0.049	0.037	0.026	0.044	0.04	0.071	0.046	0.036	0.03	0.032	0.045	0.026	0.024	0.025	0.017	0.027	0.021	0.018
65.25	0.044	0.054	0.049	0.041	0.043	0.057	0.054	0.039	0.041	0.06	0.026	0.03	0.045	0.035	0.029	0.028	0.054	0.032	0.04	0.049	0.037	0.026	0.043	0.038	0.065	0.046	0.036	0.029	0.033	0.047	0.024	0.024	0.026	0.018	0.027	0.021	0.02
65.5	0.045	0.052	0.044	0.039	0.043	0.056	0.054	0.039	0.04	0.062	0.025	0.031	0.044	0.036	0.029	0.029	0.051	0.031	0.039	0.048	0.037	0.026	0.044	0.038	0.07	0.046	0.034	0.029	0.033	0.049	0.022	0.025	0.026	0.018	0.027	0.021	0.019
65.75	0.045	0.051	0.044	0.04	0.042	0.057	0.052	0.04	0.039	0.059	0.027	0.031	0.045	0.037	0.029	0.03	0.051	0.031	0.04	0.045	0.037	0.026	0.046	0.04	0.066	0.048	0.035	0.029	0.032	0.048	0.023	0.023	0.025	0.018	0.028	0.02	0.018
66	0.042	0.053	0.044	0.038	0.042	0.055	0.051	0.04	0.038	0.057	0.027	0.031	0.044	0.035	0.028	0.028	0.049	0.031	0.038	0.046	0.037	0.025	0.045	0.04	0.066	0.048	0.034	0.029	0.032	0.05	0.022	0.024	0.025	0.017	0.029	0.019	0.019
66.25	0.044	0.054	0.045	0.039	0.042	0.056	0.052	0.039	0.037	0.056	0.026	0.03	0.043	0.036	0.027	0.027	0.051	0.03	0.038	0.045	0.039	0.027	0.043	0.038	0.064	0.046	0.032	0.029	0.032	0.045	0.022	0.023	0.024	0.017	0.027	0.019	0.019
66.5	0.042	0.051	0.043	0.038	0.04	0.056	0.051	0.039	0.037	0.057	0.026	0.03	0.044	0.035	0.027	0.028	0.051	0.03	0.038	0.047	0.037	0.027	0.042	0.039	0.06	0.044	0.032	0.029	0.033	0.045	0.023	0.023	0.025	0.016	0.026	0.019	0.02
66.75	0.042	0.051	0.045	0.037	0.04	0.057	0.05	0.038	0.037	0.058	0.026	0.028	0.044	0.034	0.027	0.028	0.048	0.031	0.038	0.046	0.036	0.027	0.041	0.038	0.068	0.043	0.032	0.029	0.032	0.045	0.025	0.023	0.025	0.016	0.026	0.018	0.018
67	0.042	0.05	0.047	0.038	0.041	0.055	0.049	0.038	0.036	0.057	0.026	0.03	0.041	0.034	0.027	0.029	0.048	0.031	0.037	0.044	0.036	0.025	0.041	0.036	0.068	0.044	0.032	0.028	0.031	0.044	0.025	0.022	0.024	0.017	0.028	0.019	0.019
67.25	0.042	0.049	0.045	0.036	0.04	0.054	0.049	0.037	0.035	0.057	0.025	0.029	0.041	0.034	0.027	0.03	0.049	0.03	0.038	0.044	0.034	0.025	0.04	0.038	0.067	0.044	0.032	0.027	0.031	0.045	0.026	0.023	0.024	0.017	0.026	0.018	0.018
67.5	0.042	0.049	0.048	0.036	0.042	0.052	0.05	0.037	0.035	0.056	0.025	0.029	0.041	0.033	0.027	0.028	0.047	0.03	0.038	0.043	0.034	0.025	0.043	0.038	0.065	0.042	0.033	0.027	0.031	0.042	0.021	0.023	0.024	0.016	0.024	0.018	0.018
67.75	0.042	0.05	0.045	0.035	0.039	0.053	0.05	0.036	0.035	0.056	0.025	0.03	0.041	0.033	0.026	0.027	0.048	0.029	0.036	0.046	0.035	0.023	0.042	0.036	0.063	0.041	0.03	0.027	0.031	0.045	0.02	0.023	0.023	0.016	0.025	0.017	0.017
68	0.04	0.053	0.044	0.034	0.04	0.052	0.05	0.037	0.035	0.057	0.025	0.029	0.04	0.032	0.025	0.027	0.048	0.029	0.035	0.045	0.036	0.023	0.041	0.036	0.062	0.042	0.031	0.026	0.03	0.05	0.019	0.022	0.023	0.015	0.025	0.017	0.019
68.25	0.04	0.048	0.048	0.033	0.04	0.052	0.048	0.036	0.035	0.053	0.024	0.03	0.042	0.03	0.025	0.026	0.046	0.028	0.037	0.042	0.033	0.022	0.039	0.036	0.059	0.044	0.032	0.026	0.031	0.045	0.019	0.021	0.023	0.015	0.024	0.017	0.018
68.5	0.039	0.046	0.045	0.034	0.04	0.051	0.047	0.034	0.035	0.054	0.022	0.029	0.042	0.031	0.025	0.027	0.047	0.029	0.035	0.042	0.034	0.021	0.039	0.037	0.062	0.041	0.031	0.026	0.031	0.043	0.019	0.021	0.022	0.015	0.022	0.017	0.015
68.75	0.037	0.046	0.044	0.033	0.038	0.05	0.046	0.034	0.035	0.057	0.023	0.027	0.04	0.032	0.024	0.025	0.047	0.029	0.035	0.042	0.033	0.022	0.039	0.038	0.057	0.042	0.029	0.026	0.032	0.044	0.022	0.022	0.023	0.015	0.023	0.017	0.016
69	0.038	0.045	0.038	0.032	0.037	0.05	0.046	0.034	0.034	0.056	0.023	0.028	0.04	0.031	0.024	0.026	0.044	0.028	0.035	0.044	0.033	0.023	0.04	0.037	0.057	0.04	0.029	0.025	0.031	0.044	0.022	0.021	0.022	0.015	0.023	0.017	0.016
69.25	0.037	0.045	0.041	0.031	0.037	0.05	0.046	0.033	0.034	0.056	0.023	0.029	0.04	0.033	0.024	0.025	0.044	0.027	0.034	0.04	0.034	0.021	0.039	0.038	0.059	0.04	0.03	0.025	0.03	0.042	0.022	0.021	0.022	0.015	0.023	0.017	0.015
69.5	0.038	0.045	0.042	0.03	0.036	0.049	0.045	0.035	0.034	0.054	0.023	0.028	0.039	0.032	0.024	0.025	0.043	0.028	0.033	0.038	0.034	0.02	0.038	0.037	0.056	0.04	0.032	0.026	0.029	0.043	0.023	0.021	0.022	0.014	0.023	0.016	0.017
69.75	0.037	0.044	0.043	0.03	0.034	0.049	0.044	0.034	0.032	0.053	0.024	0.027	0.038	0.031	0.023	0.026	0.045	0.029	0.034	0.039	0.033	0.022	0.037	0.035	0.055	0.039	0.03	0.026	0.029	0.041	0.02	0.02	0.021	0.014	0.023	0.016	0.017
70	0.037	0.045	0.045	0.03	0.033	0.047	0.044	0.033	0.031	0.053	0.023	0.027	0.036	0.032	0.022	0.025	0.042	0.027	0.033	0.04	0.032	0.021	0.038	0.035	0.056	0.039	0.029	0.026	0.029	0.04	0.018	0.02	0.021	0.014	0.022	0.016	0.015
70.25	0.035	0.043	0.041	0.03	0.034	0.047	0.045	0.033	0.032	0.052	0.022	0.027	0.038	0.03	0.022	0.025	0.043	0.024	0.033	0.04	0.033	0.02	0.037	0.035	0.057	0.039	0.026	0.025	0.028	0.041	0.021	0.02	0.021	0.015	0.024	0.015	0.015
70.5	0.035	0.042	0.038	0.03	0.034	0.046	0.043	0.032	0.032	0.05	0.023	0.027	0.037	0.03	0.021	0.024	0.045	0.024	0.033	0.04	0.031	0.022	0.039	0.034	0.056	0.039	0.026	0.025	0.027	0.04	0.021	0.019	0.02	0.014	0.023	0.015	0.015
70.75	0.036	0.043	0.038	0.029	0.035	0.047	0.043	0.031	0.031	0.049	0.023	0.028	0.037	0.03	0.022	0.024	0.045	0.024	0.033	0.039	0.029	0.02	0.039	0.034	0.058	0.039	0.026	0.024	0.028	0.041	0.021	0.019	0.02	0.013	0.023	0.016	0.015
71	0.036	0.042	0.037	0.03	0.035	0.046	0.043	0.031	0.031	0.051	0.022	0.026	0.04	0.029	0.022	0.024	0.044	0.026	0.033	0.036	0.029	0.02	0.038	0.033	0.06	0.038	0.026	0.024	0.027	0.041	0.018	0.02	0.02	0.013	0.021	0.016	0.014
71.25	0.035	0.041	0.04	0.028	0.034	0.046	0.042	0.03	0.031	0.05	0.022	0.026	0.053	0.028	0.021	0.024	0.043	0.026	0.031	0.037	0.028	0.021	0.036	0.033	0.055	0.037	0.027	0.024	0.027	0.041	0.019	0.019	0.02	0.013	0.02	0.016	0.014
71.5	0.034	0.04	0.04	0.027	0.031	0.046	0.04	0.03	0.031	0.049	0.022	0.025	0.083	0.029	0.02	0.024	0.043	0.025	0.03	0.038	0.029	0.021	0.035	0.032	0.052	0.038	0.027	0.024	0.027	0.038	0.019	0.019	0.02	0.013	0.021	0.015	0.014
71.75	0.033	0.04	0.041	0.028	0.033	0.043	0.041	0.03	0.031	0.051	0.021	0.026	0.056	0.03	0.02	0.023	0.041	0.023	0.03	0.037	0.028	0.02	0.038	0.032	0.053	0.038	0.027	0.024	0.026	0.039	0.019	0.019	0.019	0.013	0.02	0.015	0.013
72	0.032	0.04	0.04	0.028	0.033	0.046	0.043	0.031	0.028	0.05	0.02	0.026	0.039	0.028	0.021	0.022	0.041	0.023	0.031	0.037	0.028	0.018	0.037	0.032	0.055	0.037	0.026	0.023	0.027	0.039	0.018	0.019	0.018	0.013	0.02	0.015	0.012
72.25	0.03	0.039	0.037	0.027	0.03	0.045	0.041	0.03	0.028	0.047	0.021	0.024	0.038	0.028	0.02	0.021	0.04	0.023	0.029	0.035	0.028	0.019	0.037	0.032	0.052	0.035	0.025	0.023	0.026	0.04	0.019	0.018	0.018	0.013	0.02	0.014	0.014
72.5	0.032	0.039	0.041	0.026	0.031	0.045	0.039	0.028	0.028	0.047	0.02	0.024	0.037	0.027	0.02	0.023	0.039	0.023	0.03	0.035	0.027	0.019	0.036	0.031	0.049	0.037	0.025	0.022	0.025	0.039	0.02	0.017	0.019	0.012	0.02	0.014	0.014
72.75	0.032	0.038	0.036	0.025	0.031	0.042	0.038	0.027	0.027	0.047	0.02	0.024	0.038	0.026	0.02	0.022	0.039	0.022	0.031	0.034	0.026	0.018	0.034	0.031	0.052	0.036	0.025	0.023	0.025	0.038	0.017	0.017	0.018	0.012	0.02	0.014	0.013
73	0.031	0.038	0.034	0.025	0.03	0.041	0.038	0.027	0.028	0.046	0.02	0.024	0.043	0.026	0.019	0.022	0.04	0.023	0.028	0.034	0.025	0.018	0.034	0.031	0.051	0.034	0.025	0.022	0.025	0.038	0.018	0.017	0.017	0.013	0.019	0.014	0.013
73.25	0.03	0.038	0.034	0.025	0.03	0.04	0.039	0.026	0.027	0.045	0.02	0.024	0.05	0.027	0.019	0.023	0.04	0.023	0.027	0.034	0.026	0.017	0.034	0.031	0.052	0.034	0.026	0.022	0.026	0.037	0.018	0.017	0.017	0.012	0.018	0.014	0.014
73.5	0.031	0.035	0.036	0.024	0.03	0.038	0.038	0.026	0.027	0.044	0.019	0.023	0.039	0.026	0.019	0.022	0.037	0.022	0.028	0.034	0.025	0.018	0.033	0.03	0.049	0.036	0.024	0.022	0.025	0.037	0.018	0.016	0.017	0.012	0.018	0.014	0.013
73.75	0.03	0.036	0.037	0.024	0.03	0.04	0.037	0.025	0.027	0.04	0.019	0.023	0.034	0.026	0.018	0.022	0.036	0.022	0.027	0.033	0.026	0.018	0.032	0.03	0.049	0.034	0.023	0.022	0.025	0.034	0.018	0.017	0.017	0.012	0.018	0.013	0.012
74	0.029	0.035	0.034	0.023	0.029	0.04	0.037	0.025	0.026	0.04	0.019	0.024	0.034	0.026	0.018	0.021	0.036	0.021	0.027	0.032	0.027	0.016	0.032	0.029	0.049	0.034	0.023	0.022	0.025	0.035	0.017	0.017	0.016	0.012	0.018	0.013	0.012
74.25	0.027	0.035	0.034	0.023	0.028	0.04	0.035	0.024	0.026	0.043	0.018	0.023	0.034	0.026	0.018	0.02	0.037	0.019	0.026	0.032	0.025	0.016	0.033	0.029	0.046	0.034	0.023	0.021	0.024	0.033	0.016	0.017	0.016	0.011	0.018	0.013	0.013
74.5	0.027	0.034	0.03	0.022	0.027	0.037	0.036	0.025	0.024	0.042	0.018	0.022	0.033	0.025	0.017	0.02	0.038	0.02	0.025	0.031	0.024	0.015	0.031	0.028	0.045	0.034	0.023	0.021	0.024	0.033	0.017	0.015	0.016	0.011	0.017	0.013	0.013
74.75	0.026	0.033	0.034	0.021	0.026	0.038	0.034	0.024	0.025	0.043	0.018	0.022	0.033	0.025	0.016	0.02	0.036	0.021	0.025	0.032	0.024	0.014	0.032	0.028	0.044	0.033	0.022	0.02	0.025	0.033	0.015	0.016	0.016	0.01	0.017	0.013	0.012
75	0.026	0.032	0.033	0.021	0.026	0.039	0.033	0.024	0.024	0.041	0.018	0.022	0.032	0.025	0.016	0.02	0.034	0.02	0.025	0.031	0.025	0.015	0.031	0.028	0.044	0.032	0.023	0.019	0.023	0.033	0.015	0.016	0.015	0.01	0.018	0.012	0.012
75.25	0.026	0.032	0.036	0.022	0.025	0.037	0.034	0.023	0.024	0.04	0.018	0.022	0.032	0.025	0.016	0.02	0.033	0.02	0.025	0.03	0.025	0.015	0.03	0.028	0.044	0.032	0.022	0.02	0.023	0.034	0.015	0.016	0.015	0.01	0.017	0.012	0.01
75.5	0.027	0.032	0.034	0.021	0.026	0.035	0.032	0.023	0.024	0.039	0.017	0.022	0.032	0.024	0.016	0.019	0.032	0.019	0.025	0.032	0.024	0.015	0.029	0.027	0.046	0.032	0.021	0.019	0.022	0.034	0.015	0.015	0.015	0.01	0.017	0.012	0.01
75.75	0.026	0.032	0.028	0.021	0.025	0.035	0.032	0.022	0.024	0.039	0.017	0.021	0.03	0.023	0.016	0.019	0.032	0.02	0.025	0.03	0.023	0.015	0.029	0.027	0.043	0.031	0.021	0.019	0.021	0.033	0.016	0.014	0.015	0.01	0.016	0.011	0.01
76	0.025	0.032	0.027	0.02	0.025	0.035	0.032	0.022	0.023	0.038	0.017	0.022	0.031	0.023	0.016	0.019	0.033	0.019	0.024	0.027	0.021	0.015	0.029	0.027	0.043	0.029	0.02	0.019	0.021	0.035	0.015	0.014	0.014	0.01	0.015	0.011	0.01
76.25	0.025	0.032	0.033	0.019	0.023	0.032	0.03	0.022	0.023	0.036	0.017	0.02	0.032	0.023	0.015	0.018	0.031	0.019	0.023	0.028	0.021	0.015	0.029	0.027	0.041	0.03	0.019	0.018	0.021	0.033	0.014	0.014	0.014	0.01	0.016	0.011	0.012
76.5	0.024	0.03	0.032	0.018	0.022	0.031	0.03	0.022	0.022	0.036	0.016	0.02	0.031	0.022	0.015	0.018	0.031	0.019	0.022	0.028	0.021	0.014	0.027	0.026	0.04	0.03	0.02	0.018	0.021	0.03	0.014	0.013	0.013	0.01	0.015	0.011	0.011
76.75	0.024	0.029	0.028	0.018	0.022	0.032	0.029	0.021	0.021	0.037	0.015	0.02	0.031	0.021	0.014	0.018	0.032	0.019	0.022	0.027	0.021	0.013	0.027	0.025	0.039	0.029	0.019	0.018	0.021	0.03	0.016	0.013	0.013	0.01	0.015	0.011	0.009
77	0.023	0.029	0.027	0.018	0.021	0.033	0.029	0.02	0.021	0.035	0.015	0.018	0.03	0.022	0.014	0.017	0.03	0.018	0.022	0.027	0.02	0.013	0.027	0.024	0.041	0.029	0.018	0.018	0.02	0.029	0.014	0.013	0.013	0.009	0.015	0.011	0.01
77.25	0.023	0.029	0.028	0.018	0.02	0.031	0.027	0.02	0.021	0.032	0.015	0.02	0.03	0.021	0.014	0.017	0.03	0.018	0.02	0.027	0.019	0.014	0.027	0.024	0.038	0.028	0.019	0.017	0.02	0.029	0.013	0.014	0.013	0.009	0.015	0.011	0.011
77.5	0.022	0.027	0.029	0.018	0.021	0.031	0.028	0.02	0.021	0.033	0.015	0.019	0.029	0.02	0.014	0.018	0.029	0.016	0.021	0.026	0.021	0.013	0.025	0.023	0.037	0.027	0.018	0.017	0.019	0.029	0.013	0.013	0.012	0.009	0.014	0.01	0.009
77.75	0.022	0.026	0.029	0.017	0.021	0.03	0.028	0.019	0.02	0.034	0.015	0.019	0.028	0.019	0.014	0.017	0.028	0.016	0.021	0.025	0.021	0.013	0.025	0.023	0.038	0.027	0.018	0.017	0.019	0.03	0.013	0.013	0.012	0.009	0.014	0.01	0.009
78	0.022	0.026	0.029	0.016	0.02	0.03	0.027	0.019	0.019	0.033	0.014	0.018	0.028	0.02	0.013	0.018	0.027	0.016	0.021	0.024	0.019	0.012	0.025	0.022	0.036	0.026	0.018	0.016	0.018	0.03	0.013	0.013	0.012	0.009	0.014	0.01	0.01
78.25	0.021	0.026	0.029	0.015	0.019	0.028	0.027	0.019	0.02	0.033	0.014	0.018	0.03	0.02	0.013	0.016	0.027	0.016	0.02	0.023	0.019	0.012	0.023	0.022	0.035	0.026	0.016	0.015	0.018	0.029	0.012	0.012	0.012	0.008	0.014	0.009	0.01
78.5	0.02	0.026	0.025	0.016	0.019	0.028	0.026	0.019	0.019	0.032	0.014	0.018	0.031	0.019	0.013	0.016	0.027	0.015	0.02	0.024	0.019	0.012	0.023	0.022	0.035	0.025	0.016	0.015	0.018	0.03	0.012	0.012	0.011	0.008	0.013	0.009	0.008
78.75	0.019	0.025	0.022	0.015	0.019	0.027	0.026	0.018	0.019	0.032	0.014	0.016	0.028	0.019	0.012	0.016	0.026	0.015	0.019	0.023	0.018	0.012	0.022	0.021	0.034	0.024	0.016	0.014	0.018	0.028	0.012	0.011	0.011	0.008	0.013	0.009	0.009
79	0.019	0.025	0.024	0.015	0.019	0.025	0.025	0.017	0.018	0.032	0.014	0.018	0.027	0.019	0.012	0.016	0.026	0.015	0.019	0.023	0.017	0.012	0.023	0.021	0.033	0.024	0.016	0.015	0.017	0.027	0.011	0.011	0.011	0.008	0.013	0.009	0.01
79.25	0.018	0.024	0.026	0.015	0.017	0.025	0.024	0.016	0.017	0.029	0.013	0.017	0.026	0.019	0.012	0.015	0.024	0.014	0.019	0.023	0.017	0.011	0.022	0.021	0.034	0.024	0.015	0.014	0.017	0.025	0.011	0.011	0.01	0.008	0.011	0.009	0.009
79.5	0.018	0.024	0.028	0.015	0.017	0.026	0.024	0.016	0.018	0.028	0.013	0.016	0.026	0.018	0.012	0.015	0.024	0.014	0.018	0.023	0.017	0.01	0.021	0.02	0.033	0.024	0.014	0.014	0.016	0.024	0.011	0.011	0.01	0.008	0.011	0.009	0.008
79.75	0.018	0.023	0.027	0.014	0.016	0.024	0.024	0.016	0.017	0.028	0.012	0.016	0.026	0.016	0.012	0.014	0.025	0.014	0.018	0.022	0.017	0.01	0.021	0.02	0.03	0.023	0.015	0.013	0.016	0.024	0.011	0.01	0.01	0.007	0.012	0.008	0.008
80	0.018	0.022	0.025	0.013	0.016	0.024	0.023	0.016	0.017	0.027	0.012	0.017	0.025	0.017	0.011	0.014	0.025	0.013	0.017	0.02	0.016	0.01	0.021	0.02	0.029	0.022	0.014	0.013	0.016	0.024	0.011	0.01	0.01	0.007	0.011	0.008	0.009

## Sheet: TDW_REC1
Each value represents the relative amount of power in a given frequency bin (column A); the data is depicted against a weighted reference as described in material and methods. Each columns represents data of one mouse
	WT																				KO
Freq[Hz]	_1WT_NO_CIRP03	_1WT_NO_CIRP04	_1WT_NO_CIRP05	_1WT_NO_CIRP09	_1WT_NO_CIRP11	_1WT_NO_CIRP18	_1WT_NO_CIRP19	_1WT_NO_CIRP29	_1WT_NO_CIRP30	_1WT_NO_CIRP31	_1WT_NO_CIRP48	_1WT_YS_TC03	_1WT_YS_TC06	_1WT_YS_TC08	_1WT_YS_TC09	_1WT_YS_TC12	_1WT_YS_TC13	_1WT_YS_TC18	_1WT_YS_TC21	_1WT_YS_TC22	_2KO_NO_CIRP01	_2KO_NO_CIRP10	_2KO_NO_CIRP13	_2KO_NO_CIRP14	_2KO_NO_CIRP15	_2KO_NO_CIRP20	_2KO_NO_CIRP25	_2KO_NO_CIRP40	_2KO_NO_CIRP50	_2KO_YS_TC01	_2KO_YS_TC07	_2KO_YS_TC10	_2KO_YS_TC15	_2KO_YS_TC16	_2KO_YS_TC17	_2KO_YS_TC19	_2KO_YS_TC20
0.75	0.859	1.034	0.821	0.956	0.826	1.203	0.942	0.643	0.658	1.216	0.577	0.752	0.698	0.634	0.667	0.74	0.567	0.572	0.662	0.695	1.445	1.438	1.082	1.348	0.924	0.923	1.51	0.63	0.582	0.777	0.681	0.756	0.692	0.713	2.77	0.793	0.876
1	1.057	1.22	0.994	1.027	0.952	1.28	1.24	0.864	0.79	1.12	0.662	0.812	0.773	0.805	0.759	0.762	0.712	0.767	0.876	0.915	1.479	1.679	1.372	1.808	1.127	1.037	1.463	0.903	0.774	0.955	0.812	0.909	0.843	0.654	2.521	1.032	1.171
1.25	1.113	1.366	1.197	1.078	1.066	1.37	1.442	1.026	0.955	1.219	0.716	0.948	0.898	0.958	0.866	0.832	0.68	0.905	0.994	1.043	1.505	1.746	1.465	2.064	1.329	1.149	1.483	1.156	0.905	1.048	0.966	0.997	1.057	0.663	2.133	1.214	1.381
1.5	1.149	1.426	1.269	1.085	1.167	1.375	1.502	1.137	1.037	1.297	0.771	0.989	0.966	1.006	0.962	0.903	0.73	0.971	0.993	1.058	1.377	1.777	1.53	2.2	1.428	1.206	1.312	1.229	1.03	1.148	1.045	1.006	1.132	0.672	1.797	1.242	1.364
1.75	1.071	1.287	1.142	1.106	1.164	1.382	1.465	1.187	1.049	1.239	0.804	0.93	0.959	0.976	0.963	0.895	0.731	1.086	0.975	1.005	1.228	1.768	1.643	2.013	1.35	1.166	1.21	1.364	1.011	1.167	1.064	0.948	1.228	0.675	1.556	1.187	1.288
2	1.006	1.306	1.202	1.119	1.102	1.429	1.436	1.24	1.017	1.153	0.754	0.879	0.882	0.846	0.952	0.835	0.738	1.082	0.95	0.868	1.257	1.728	1.634	1.749	1.348	1.112	1.07	1.333	0.95	1.143	1.032	0.908	1.184	0.679	1.327	1.229	1.197
2.25	0.94	1.233	1.159	1.048	1.058	1.376	1.413	1.216	0.969	1.085	0.752	0.85	0.821	0.778	0.936	0.759	0.756	1.017	0.849	0.827	1.131	1.486	1.557	1.561	1.318	1.056	0.947	1.33	0.945	0.995	0.99	0.853	1.061	0.648	1.198	1.112	1.04
2.5	0.869	1.137	1.027	1.035	1.002	1.371	1.304	1.182	0.905	0.984	0.75	0.782	0.78	0.727	0.903	0.707	0.718	1	0.807	0.779	1.08	1.371	1.453	1.397	1.191	0.975	0.844	1.206	0.874	0.894	0.932	0.79	0.958	0.612	1.035	1.035	0.916
2.75	0.814	1.127	0.931	1.078	0.93	1.392	1.194	1.117	0.87	0.894	0.727	0.75	0.702	0.715	0.818	0.653	0.691	0.963	0.785	0.68	0.972	1.228	1.323	1.281	1.038	0.902	0.765	1.111	0.809	0.91	0.834	0.762	0.83	0.57	0.93	0.928	0.775
3	0.778	1.042	0.895	0.951	0.867	1.208	1.052	1.023	0.833	0.784	0.709	0.681	0.687	0.681	0.787	0.607	0.705	0.906	0.689	0.62	0.947	1.037	1.13	1.157	0.924	0.826	0.727	1.066	0.759	0.871	0.75	0.704	0.774	0.54	0.774	0.841	0.668
3.25	0.755	0.978	0.905	0.856	0.796	1.023	1	0.935	0.803	0.726	0.65	0.616	0.676	0.588	0.755	0.535	0.694	0.802	0.637	0.572	0.906	0.991	0.993	1.025	0.831	0.739	0.645	1.015	0.723	0.82	0.707	0.629	0.711	0.51	0.684	0.808	0.623
3.5	0.668	0.938	0.824	0.822	0.738	0.894	0.951	0.858	0.745	0.683	0.593	0.565	0.615	0.533	0.699	0.49	0.61	0.777	0.587	0.524	0.843	0.811	0.888	0.896	0.709	0.692	0.614	0.889	0.674	0.724	0.626	0.552	0.631	0.442	0.621	0.704	0.576
3.75	0.621	1.012	0.753	0.825	0.675	0.856	0.883	0.802	0.69	0.659	0.56	0.582	0.577	0.564	0.685	0.459	0.613	0.757	0.566	0.496	0.837	0.711	0.813	0.851	0.666	0.661	0.565	0.825	0.625	0.665	0.581	0.513	0.583	0.423	0.585	0.622	0.539
4	0.616	0.921	0.664	0.792	0.682	0.851	0.854	0.797	0.649	0.649	0.54	0.539	0.546	0.54	0.677	0.456	0.609	0.79	0.566	0.485	0.809	0.709	0.757	0.81	0.673	0.64	0.542	0.767	0.604	0.66	0.57	0.488	0.565	0.422	0.609	0.562	0.454
4.25	0.603	0.885	0.615	0.776	0.704	0.857	0.81	0.785	0.664	0.643	0.547	0.531	0.534	0.577	0.682	0.42	0.615	0.76	0.531	0.471	0.786	0.665	0.709	0.792	0.65	0.613	0.517	0.712	0.626	0.602	0.549	0.462	0.561	0.418	0.601	0.549	0.461
4.5	0.605	0.906	0.608	0.767	0.723	0.788	0.782	0.741	0.64	0.639	0.542	0.536	0.566	0.519	0.688	0.434	0.531	0.732	0.525	0.451	0.778	0.693	0.692	0.744	0.639	0.577	0.514	0.719	0.611	0.579	0.563	0.452	0.547	0.412	0.567	0.567	0.436
4.75	0.618	0.87	0.657	0.793	0.709	0.805	0.794	0.719	0.651	0.636	0.53	0.51	0.578	0.565	0.673	0.457	0.541	0.691	0.536	0.459	0.785	0.636	0.681	0.75	0.638	0.575	0.516	0.674	0.608	0.57	0.568	0.466	0.551	0.415	0.543	0.527	0.438
5	0.598	0.882	0.657	0.797	0.716	0.799	0.801	0.73	0.647	0.626	0.541	0.475	0.551	0.577	0.647	0.462	0.566	0.716	0.535	0.455	0.763	0.637	0.67	0.736	0.635	0.569	0.52	0.622	0.61	0.595	0.577	0.467	0.534	0.411	0.549	0.551	0.468
5.25	0.591	0.847	0.674	0.775	0.736	0.854	0.805	0.751	0.637	0.629	0.504	0.453	0.595	0.587	0.67	0.478	0.541	0.676	0.534	0.43	0.774	0.627	0.688	0.717	0.619	0.579	0.522	0.665	0.659	0.563	0.573	0.455	0.521	0.405	0.552	0.566	0.427
5.5	0.616	0.845	0.692	0.782	0.728	0.884	0.783	0.742	0.681	0.63	0.501	0.455	0.592	0.624	0.692	0.449	0.547	0.683	0.536	0.467	0.78	0.618	0.698	0.724	0.599	0.606	0.553	0.683	0.667	0.62	0.546	0.465	0.531	0.416	0.561	0.574	0.447
5.75	0.636	0.983	0.717	0.777	0.786	0.871	0.746	0.745	0.702	0.655	0.53	0.469	0.626	0.656	0.681	0.494	0.559	0.714	0.531	0.477	0.792	0.64	0.706	0.732	0.569	0.644	0.582	0.693	0.648	0.628	0.556	0.466	0.544	0.423	0.566	0.571	0.454
6	0.699	1.047	0.724	0.856	0.847	0.966	0.81	0.75	0.75	0.674	0.568	0.468	0.673	0.641	0.733	0.5	0.562	0.745	0.558	0.502	0.843	0.678	0.728	0.739	0.636	0.683	0.61	0.761	0.68	0.67	0.596	0.471	0.578	0.44	0.63	0.622	0.456
6.25	0.747	1.115	0.786	0.916	0.855	1.007	0.865	0.798	0.843	0.716	0.611	0.457	0.671	0.675	0.807	0.51	0.586	0.77	0.591	0.512	0.877	0.676	0.744	0.783	0.639	0.757	0.623	0.773	0.745	0.656	0.596	0.498	0.604	0.457	0.668	0.647	0.487
6.5	0.853	1.375	0.944	1.031	0.982	1.21	1.025	0.875	0.939	0.799	0.661	0.527	0.75	0.814	0.899	0.563	0.688	0.911	0.684	0.594	1.024	0.748	0.839	0.864	0.765	0.877	0.67	0.829	0.8	0.664	0.669	0.536	0.703	0.483	0.755	0.706	0.58
6.75	1.061	2.021	1.246	1.19	1.308	1.621	1.284	1.096	1.111	0.973	0.807	0.644	0.882	1.049	1.104	0.74	0.921	1.281	0.814	0.693	1.345	0.999	0.99	0.994	1.023	1.135	0.826	1.082	0.95	0.848	0.823	0.631	0.876	0.567	0.955	0.842	0.657
7	1.211	2.482	1.338	1.44	1.526	1.821	1.526	1.27	1.301	1.06	0.892	0.763	1.007	1.278	1.304	0.83	1.015	1.494	0.98	0.836	1.731	1.167	1.123	1.089	1.079	1.382	0.957	1.278	1.083	0.945	0.932	0.708	1	0.606	1.095	0.947	0.692
7.25	1.403	2.939	1.57	1.603	1.591	2.056	1.784	1.384	1.588	1.193	1.032	0.863	1.168	1.311	1.449	0.907	1.121	1.683	1.106	0.947	2.002	1.173	1.308	1.213	1.114	1.6	1.059	1.357	1.236	1.014	1.062	0.776	1.175	0.674	1.19	1.006	0.773
7.5	1.612	3.335	1.892	1.783	1.693	2.305	2.011	1.561	1.771	1.283	1.121	0.852	1.239	1.284	1.534	1.061	1.245	1.932	1.251	1.027	2.23	1.329	1.439	1.354	1.327	1.892	1.104	1.473	1.355	1.129	1.239	0.83	1.314	0.725	1.25	1.093	0.787
7.75	1.864	3.479	2.14	2.073	1.775	2.607	2.316	1.774	1.938	1.387	1.287	1.018	1.352	1.542	1.669	1.079	1.347	1.916	1.336	1.196	2.403	1.569	1.542	1.564	1.453	2.218	1.275	1.614	1.404	1.255	1.345	0.922	1.374	0.782	1.489	1.202	0.849
8	2.17	3.607	2.038	2.301	1.852	2.82	2.614	1.961	2.15	1.517	1.42	1.428	1.603	1.925	1.943	1.134	1.393	1.949	1.571	1.293	2.484	1.677	1.875	1.718	1.621	2.305	1.525	1.713	1.532	1.409	1.443	1.094	1.523	0.857	1.64	1.412	0.898
8.25	2.336	3.737	1.84	2.609	1.861	3.005	2.729	2.278	2.282	1.713	1.427	1.252	1.65	1.952	2.145	1.213	1.468	2.069	1.605	1.491	2.286	1.854	2.105	1.964	1.704	2.42	1.636	1.902	1.727	1.567	1.498	1.169	1.667	0.916	1.755	1.544	0.96
8.5	2.451	3.242	1.589	2.682	1.931	2.98	2.634	2.345	2.477	1.932	1.507	1.356	1.82	1.79	2.263	1.252	1.575	2.103	1.787	1.685	2.007	1.924	2.24	2.337	1.868	2.403	1.822	1.996	1.916	1.66	1.612	1.261	1.721	1.028	1.837	1.614	1.156
8.75	2.385	2.727	1.269	2.898	1.938	2.628	2.43	2.201	2.265	2.141	1.514	1.351	2.016	1.563	2.345	1.186	1.614	2.067	1.891	1.774	1.718	1.796	2.308	2.619	1.734	2.239	1.956	2.139	2.153	1.782	1.717	1.476	1.657	1.138	1.994	1.667	1.228
9	2.086	1.979	0.965	2.695	1.833	2.251	1.885	2.071	2.203	2.248	1.394	1.359	2.049	1.432	2.436	1.085	1.537	1.873	1.665	1.684	1.346	1.568	2.25	2.932	1.667	1.869	1.932	2.005	2.306	1.828	1.677	1.558	1.47	1.215	1.883	1.625	1.128
9.25	1.749	1.401	0.798	2.312	1.626	1.918	1.547	1.804	1.854	2.257	1.226	1.372	1.902	1.207	2.382	1.047	1.418	1.468	1.487	1.504	1.025	1.361	2.05	3.121	1.429	1.516	1.741	1.791	2.26	1.642	1.6	1.536	1.289	1.267	1.563	1.505	1.046
9.5	1.423	1.047	0.678	2.016	1.404	1.606	1.23	1.437	1.485	2.183	1.061	1.304	1.638	0.896	2.245	0.995	1.208	1.107	1.217	1.26	0.841	1.061	1.83	3.11	1.193	1.271	1.416	1.538	2.131	1.354	1.463	1.435	1.01	1.222	1.403	1.273	0.994
9.75	1.174	0.826	0.564	1.667	1.262	1.262	1.004	1.229	1.247	1.89	0.86	1.074	1.498	0.779	1.92	0.845	0.891	0.926	0.993	1.042	0.709	0.903	1.448	2.844	0.899	1.017	1.185	1.316	1.996	1.161	1.284	1.185	0.779	1.138	1.142	1.035	0.948
10	0.905	0.737	0.495	1.286	1.035	0.957	0.799	0.993	1.03	1.567	0.712	0.868	1.237	0.665	1.59	0.68	0.702	0.691	0.76	0.827	0.593	0.693	1.114	2.412	0.69	0.792	0.979	1.074	1.809	0.982	1.162	0.958	0.629	1.041	0.899	0.921	0.771
10.25	0.731	0.633	0.438	1.105	0.867	0.796	0.668	0.779	0.861	1.261	0.556	0.681	1.056	0.508	1.257	0.575	0.542	0.552	0.604	0.685	0.518	0.582	0.94	1.983	0.61	0.67	0.801	0.878	1.548	0.802	0.988	0.778	0.542	0.926	0.742	0.747	0.666
10.5	0.634	0.54	0.373	0.937	0.741	0.711	0.568	0.688	0.713	1.051	0.494	0.542	0.845	0.433	0.945	0.487	0.501	0.509	0.527	0.593	0.464	0.488	0.779	1.575	0.52	0.582	0.682	0.701	1.243	0.644	0.775	0.624	0.451	0.772	0.568	0.59	0.553
10.75	0.556	0.458	0.325	0.745	0.659	0.627	0.496	0.583	0.585	0.885	0.425	0.507	0.697	0.373	0.817	0.426	0.39	0.456	0.431	0.49	0.383	0.447	0.625	1.183	0.461	0.5	0.585	0.572	1.02	0.544	0.647	0.521	0.379	0.661	0.482	0.507	0.455
11	0.461	0.425	0.278	0.636	0.528	0.544	0.405	0.484	0.503	0.719	0.354	0.431	0.593	0.315	0.697	0.351	0.326	0.395	0.362	0.403	0.336	0.39	0.552	0.958	0.391	0.432	0.493	0.495	0.836	0.467	0.546	0.421	0.321	0.544	0.426	0.452	0.395
11.25	0.393	0.376	0.256	0.527	0.46	0.466	0.351	0.424	0.441	0.616	0.313	0.337	0.497	0.268	0.569	0.286	0.287	0.349	0.305	0.359	0.307	0.323	0.457	0.792	0.324	0.369	0.422	0.405	0.722	0.402	0.456	0.345	0.289	0.428	0.363	0.392	0.354
11.5	0.349	0.338	0.25	0.46	0.412	0.418	0.3	0.386	0.375	0.522	0.275	0.297	0.45	0.262	0.466	0.254	0.267	0.311	0.271	0.327	0.264	0.329	0.416	0.652	0.313	0.332	0.365	0.378	0.632	0.352	0.404	0.301	0.248	0.364	0.319	0.349	0.299
11.75	0.31	0.325	0.242	0.419	0.356	0.376	0.276	0.351	0.321	0.439	0.25	0.261	0.397	0.252	0.406	0.221	0.243	0.298	0.234	0.281	0.237	0.29	0.362	0.538	0.282	0.301	0.324	0.345	0.538	0.303	0.349	0.266	0.227	0.318	0.294	0.303	0.255
12	0.282	0.294	0.213	0.373	0.315	0.345	0.249	0.302	0.295	0.377	0.224	0.235	0.357	0.237	0.366	0.195	0.223	0.306	0.215	0.247	0.223	0.247	0.308	0.457	0.256	0.278	0.308	0.303	0.476	0.264	0.304	0.232	0.213	0.278	0.281	0.277	0.232
12.25	0.249	0.269	0.205	0.324	0.294	0.303	0.229	0.263	0.268	0.341	0.204	0.214	0.331	0.206	0.335	0.195	0.212	0.265	0.203	0.22	0.205	0.218	0.285	0.405	0.227	0.268	0.27	0.277	0.416	0.24	0.276	0.202	0.195	0.244	0.261	0.261	0.192
12.5	0.23	0.238	0.191	0.298	0.264	0.274	0.197	0.244	0.254	0.289	0.181	0.188	0.306	0.188	0.302	0.172	0.201	0.229	0.189	0.205	0.191	0.199	0.26	0.364	0.216	0.247	0.238	0.251	0.372	0.235	0.255	0.189	0.171	0.225	0.23	0.234	0.168
12.75	0.219	0.22	0.177	0.279	0.239	0.258	0.19	0.23	0.228	0.268	0.181	0.182	0.293	0.193	0.28	0.169	0.184	0.214	0.177	0.19	0.177	0.197	0.242	0.328	0.2	0.224	0.208	0.254	0.333	0.225	0.235	0.178	0.16	0.199	0.216	0.233	0.169
13	0.203	0.211	0.169	0.251	0.226	0.246	0.179	0.213	0.206	0.242	0.18	0.188	0.257	0.192	0.257	0.157	0.174	0.2	0.164	0.185	0.161	0.174	0.229	0.295	0.188	0.211	0.186	0.225	0.318	0.198	0.213	0.167	0.157	0.188	0.204	0.216	0.159
13.25	0.191	0.201	0.167	0.244	0.224	0.244	0.167	0.205	0.192	0.221	0.16	0.165	0.239	0.188	0.239	0.149	0.176	0.197	0.156	0.171	0.152	0.164	0.213	0.269	0.176	0.201	0.181	0.21	0.298	0.184	0.206	0.154	0.151	0.174	0.199	0.191	0.161
13.5	0.179	0.198	0.164	0.223	0.207	0.232	0.158	0.201	0.184	0.213	0.158	0.152	0.233	0.187	0.228	0.141	0.16	0.189	0.146	0.157	0.146	0.156	0.204	0.256	0.169	0.182	0.17	0.196	0.273	0.18	0.198	0.145	0.143	0.157	0.194	0.186	0.143
13.75	0.167	0.183	0.155	0.217	0.2	0.21	0.15	0.19	0.177	0.202	0.148	0.146	0.224	0.164	0.215	0.139	0.155	0.171	0.134	0.152	0.149	0.151	0.19	0.233	0.164	0.176	0.162	0.182	0.26	0.164	0.188	0.136	0.133	0.148	0.178	0.177	0.135
14	0.158	0.187	0.141	0.203	0.196	0.201	0.143	0.175	0.166	0.188	0.15	0.154	0.213	0.153	0.197	0.137	0.154	0.166	0.131	0.146	0.144	0.144	0.183	0.213	0.153	0.174	0.157	0.177	0.252	0.153	0.178	0.133	0.135	0.145	0.161	0.171	0.139
14.25	0.151	0.19	0.139	0.192	0.188	0.197	0.134	0.163	0.164	0.176	0.143	0.14	0.198	0.158	0.187	0.137	0.131	0.163	0.134	0.141	0.139	0.142	0.179	0.205	0.16	0.166	0.154	0.173	0.241	0.146	0.175	0.127	0.134	0.14	0.166	0.155	0.138
14.5	0.15	0.177	0.134	0.185	0.183	0.177	0.137	0.166	0.158	0.16	0.139	0.123	0.182	0.147	0.182	0.13	0.127	0.166	0.124	0.136	0.135	0.132	0.167	0.199	0.146	0.156	0.146	0.174	0.221	0.145	0.164	0.122	0.124	0.13	0.153	0.155	0.12
14.75	0.144	0.169	0.142	0.173	0.176	0.183	0.129	0.158	0.153	0.155	0.127	0.123	0.177	0.146	0.172	0.117	0.121	0.16	0.122	0.135	0.135	0.127	0.164	0.189	0.146	0.158	0.142	0.164	0.21	0.137	0.161	0.118	0.124	0.128	0.149	0.145	0.13
15	0.134	0.168	0.135	0.165	0.171	0.191	0.132	0.156	0.149	0.143	0.127	0.13	0.174	0.142	0.169	0.11	0.112	0.144	0.12	0.128	0.132	0.123	0.158	0.176	0.15	0.149	0.137	0.161	0.199	0.132	0.155	0.111	0.124	0.13	0.145	0.146	0.138
15.25	0.127	0.167	0.128	0.161	0.161	0.186	0.13	0.152	0.144	0.138	0.129	0.127	0.179	0.137	0.162	0.111	0.115	0.139	0.11	0.122	0.127	0.128	0.146	0.167	0.14	0.143	0.132	0.156	0.2	0.13	0.158	0.109	0.124	0.125	0.147	0.145	0.121
15.5	0.121	0.167	0.133	0.156	0.158	0.168	0.123	0.143	0.143	0.134	0.127	0.12	0.171	0.149	0.156	0.106	0.121	0.155	0.108	0.121	0.126	0.121	0.147	0.16	0.143	0.143	0.129	0.15	0.201	0.129	0.152	0.111	0.123	0.119	0.139	0.141	0.118
15.75	0.122	0.172	0.133	0.148	0.151	0.164	0.121	0.142	0.149	0.133	0.126	0.12	0.161	0.14	0.157	0.102	0.106	0.145	0.114	0.121	0.127	0.119	0.154	0.153	0.129	0.147	0.135	0.151	0.19	0.116	0.147	0.108	0.12	0.113	0.136	0.136	0.114
16	0.125	0.174	0.121	0.147	0.146	0.171	0.123	0.138	0.14	0.129	0.125	0.126	0.17	0.142	0.157	0.103	0.113	0.14	0.11	0.118	0.135	0.12	0.156	0.154	0.133	0.143	0.136	0.145	0.18	0.113	0.144	0.11	0.115	0.109	0.138	0.132	0.108
16.25	0.123	0.167	0.109	0.151	0.14	0.167	0.119	0.131	0.138	0.123	0.117	0.115	0.156	0.135	0.151	0.1	0.12	0.146	0.11	0.111	0.125	0.126	0.153	0.149	0.136	0.14	0.124	0.151	0.179	0.112	0.139	0.108	0.113	0.109	0.128	0.123	0.101
16.5	0.12	0.164	0.108	0.153	0.136	0.167	0.111	0.125	0.139	0.123	0.117	0.108	0.154	0.132	0.148	0.098	0.109	0.136	0.108	0.112	0.123	0.116	0.138	0.143	0.128	0.135	0.121	0.155	0.179	0.117	0.147	0.103	0.105	0.112	0.125	0.123	0.106
16.75	0.12	0.159	0.109	0.145	0.131	0.167	0.11	0.124	0.134	0.123	0.114	0.108	0.164	0.13	0.147	0.102	0.117	0.138	0.103	0.112	0.116	0.113	0.139	0.142	0.127	0.132	0.123	0.15	0.173	0.119	0.14	0.098	0.11	0.106	0.132	0.119	0.1
17	0.115	0.155	0.121	0.139	0.127	0.163	0.109	0.129	0.137	0.121	0.122	0.1	0.162	0.122	0.146	0.104	0.119	0.135	0.104	0.116	0.114	0.113	0.134	0.144	0.128	0.129	0.119	0.143	0.165	0.11	0.142	0.1	0.111	0.102	0.136	0.118	0.098
17.25	0.115	0.148	0.116	0.14	0.126	0.16	0.111	0.125	0.138	0.12	0.112	0.103	0.16	0.127	0.146	0.101	0.115	0.133	0.102	0.11	0.112	0.113	0.137	0.143	0.128	0.13	0.127	0.144	0.166	0.112	0.137	0.098	0.113	0.099	0.14	0.122	0.092
17.5	0.115	0.14	0.104	0.138	0.122	0.154	0.111	0.121	0.135	0.115	0.113	0.103	0.156	0.119	0.14	0.096	0.107	0.138	0.104	0.106	0.107	0.118	0.13	0.138	0.135	0.12	0.125	0.138	0.161	0.108	0.131	0.101	0.112	0.1	0.134	0.117	0.101
17.75	0.113	0.148	0.105	0.131	0.117	0.149	0.099	0.12	0.129	0.118	0.109	0.101	0.15	0.117	0.142	0.097	0.096	0.131	0.098	0.102	0.104	0.117	0.131	0.132	0.135	0.121	0.119	0.136	0.164	0.114	0.13	0.101	0.11	0.097	0.121	0.118	0.099
18	0.108	0.142	0.096	0.13	0.113	0.146	0.099	0.118	0.133	0.118	0.109	0.102	0.155	0.111	0.141	0.095	0.101	0.117	0.1	0.102	0.1	0.121	0.128	0.131	0.123	0.117	0.111	0.131	0.159	0.104	0.126	0.103	0.109	0.095	0.122	0.111	0.093
18.25	0.109	0.128	0.093	0.134	0.114	0.15	0.1	0.116	0.132	0.118	0.112	0.096	0.15	0.105	0.144	0.093	0.099	0.133	0.098	0.1	0.097	0.111	0.127	0.133	0.129	0.122	0.112	0.131	0.156	0.101	0.121	0.1	0.105	0.092	0.119	0.108	0.098
18.5	0.109	0.129	0.093	0.133	0.11	0.146	0.1	0.119	0.131	0.112	0.117	0.095	0.148	0.11	0.142	0.091	0.098	0.124	0.095	0.101	0.094	0.105	0.121	0.128	0.122	0.116	0.115	0.129	0.155	0.104	0.119	0.094	0.104	0.09	0.114	0.107	0.096
18.75	0.102	0.124	0.095	0.13	0.106	0.141	0.101	0.117	0.123	0.112	0.11	0.097	0.152	0.111	0.144	0.093	0.095	0.116	0.095	0.097	0.092	0.095	0.127	0.125	0.119	0.11	0.108	0.125	0.154	0.103	0.117	0.095	0.098	0.091	0.107	0.107	0.093
19	0.098	0.119	0.088	0.123	0.102	0.139	0.095	0.111	0.117	0.11	0.105	0.098	0.152	0.108	0.139	0.091	0.096	0.113	0.089	0.094	0.093	0.105	0.127	0.125	0.116	0.112	0.107	0.124	0.148	0.1	0.115	0.094	0.094	0.087	0.106	0.106	0.088
19.25	0.101	0.12	0.083	0.121	0.105	0.136	0.088	0.11	0.121	0.106	0.098	0.091	0.147	0.106	0.137	0.088	0.101	0.106	0.089	0.093	0.085	0.112	0.119	0.123	0.114	0.109	0.1	0.123	0.148	0.099	0.11	0.091	0.093	0.085	0.107	0.102	0.094
19.5	0.099	0.113	0.088	0.127	0.107	0.126	0.089	0.105	0.117	0.106	0.099	0.089	0.147	0.1	0.132	0.089	0.09	0.102	0.093	0.095	0.083	0.103	0.117	0.118	0.107	0.107	0.101	0.12	0.145	0.099	0.104	0.088	0.094	0.085	0.105	0.103	0.094
19.75	0.1	0.104	0.083	0.126	0.101	0.121	0.087	0.1	0.108	0.103	0.105	0.083	0.138	0.098	0.135	0.09	0.094	0.097	0.091	0.092	0.085	0.098	0.115	0.118	0.102	0.103	0.104	0.11	0.148	0.09	0.106	0.087	0.093	0.084	0.104	0.099	0.088
20	0.102	0.102	0.083	0.121	0.098	0.118	0.085	0.099	0.11	0.098	0.1	0.08	0.134	0.101	0.129	0.087	0.096	0.098	0.089	0.091	0.086	0.097	0.114	0.114	0.11	0.102	0.103	0.11	0.138	0.086	0.109	0.083	0.09	0.079	0.097	0.098	0.075
20.25	0.099	0.099	0.085	0.116	0.097	0.122	0.083	0.097	0.108	0.102	0.092	0.087	0.14	0.097	0.121	0.083	0.095	0.105	0.089	0.086	0.085	0.094	0.103	0.114	0.107	0.099	0.096	0.108	0.143	0.092	0.105	0.083	0.088	0.075	0.097	0.092	0.075
20.5	0.093	0.097	0.087	0.109	0.096	0.115	0.083	0.093	0.107	0.1	0.095	0.079	0.142	0.092	0.118	0.086	0.085	0.091	0.085	0.083	0.081	0.085	0.097	0.111	0.097	0.102	0.093	0.102	0.137	0.09	0.099	0.081	0.086	0.075	0.098	0.087	0.079
20.75	0.095	0.1	0.082	0.106	0.092	0.117	0.08	0.095	0.104	0.095	0.092	0.08	0.145	0.094	0.116	0.086	0.083	0.091	0.084	0.085	0.081	0.088	0.098	0.109	0.09	0.099	0.089	0.1	0.131	0.081	0.097	0.079	0.087	0.073	0.092	0.095	0.077
21	0.095	0.098	0.08	0.104	0.092	0.11	0.081	0.093	0.099	0.094	0.093	0.079	0.141	0.092	0.113	0.086	0.086	0.088	0.08	0.084	0.079	0.084	0.097	0.102	0.095	0.099	0.089	0.1	0.13	0.079	0.097	0.079	0.09	0.071	0.095	0.097	0.076
21.25	0.093	0.089	0.076	0.105	0.089	0.101	0.079	0.09	0.098	0.097	0.088	0.073	0.129	0.088	0.112	0.084	0.078	0.083	0.077	0.081	0.074	0.08	0.093	0.099	0.098	0.095	0.088	0.1	0.126	0.078	0.092	0.076	0.087	0.073	0.091	0.089	0.072
21.5	0.087	0.088	0.08	0.104	0.083	0.097	0.078	0.087	0.092	0.094	0.087	0.073	0.123	0.089	0.113	0.081	0.078	0.086	0.078	0.081	0.076	0.079	0.092	0.095	0.093	0.091	0.09	0.095	0.125	0.079	0.09	0.074	0.083	0.071	0.093	0.082	0.073
21.75	0.086	0.086	0.077	0.104	0.082	0.098	0.077	0.089	0.091	0.088	0.09	0.07	0.121	0.09	0.107	0.085	0.081	0.08	0.078	0.084	0.074	0.079	0.091	0.092	0.09	0.095	0.09	0.091	0.126	0.08	0.093	0.069	0.08	0.067	0.09	0.083	0.067
22	0.084	0.09	0.072	0.102	0.085	0.104	0.076	0.087	0.092	0.086	0.088	0.071	0.115	0.089	0.102	0.083	0.075	0.081	0.077	0.077	0.071	0.086	0.091	0.091	0.092	0.092	0.087	0.094	0.117	0.079	0.091	0.068	0.08	0.064	0.09	0.085	0.062
22.25	0.084	0.09	0.074	0.101	0.083	0.104	0.076	0.084	0.087	0.087	0.086	0.075	0.114	0.083	0.103	0.076	0.078	0.083	0.075	0.078	0.075	0.081	0.085	0.088	0.091	0.088	0.087	0.1	0.117	0.076	0.089	0.069	0.079	0.067	0.088	0.091	0.068
22.5	0.084	0.092	0.071	0.099	0.078	0.095	0.074	0.08	0.089	0.088	0.08	0.075	0.113	0.079	0.099	0.072	0.085	0.083	0.077	0.078	0.071	0.072	0.086	0.088	0.091	0.088	0.087	0.094	0.113	0.075	0.09	0.068	0.08	0.068	0.087	0.082	0.069
22.75	0.085	0.087	0.067	0.099	0.078	0.096	0.075	0.079	0.088	0.086	0.081	0.072	0.111	0.088	0.097	0.068	0.078	0.081	0.075	0.075	0.069	0.074	0.081	0.087	0.091	0.089	0.087	0.092	0.113	0.072	0.09	0.068	0.078	0.064	0.082	0.078	0.066
23	0.082	0.085	0.068	0.097	0.08	0.096	0.072	0.08	0.086	0.085	0.079	0.068	0.114	0.086	0.099	0.069	0.073	0.075	0.074	0.079	0.072	0.075	0.078	0.085	0.094	0.086	0.077	0.092	0.113	0.075	0.084	0.065	0.079	0.063	0.085	0.08	0.071
23.25	0.079	0.085	0.074	0.094	0.074	0.095	0.072	0.079	0.087	0.083	0.076	0.068	0.103	0.086	0.098	0.075	0.078	0.078	0.072	0.078	0.069	0.076	0.081	0.085	0.091	0.085	0.079	0.086	0.113	0.072	0.085	0.065	0.075	0.061	0.087	0.079	0.068
23.5	0.077	0.082	0.072	0.091	0.077	0.091	0.07	0.076	0.086	0.082	0.082	0.065	0.102	0.086	0.094	0.074	0.079	0.073	0.072	0.079	0.071	0.073	0.077	0.082	0.086	0.085	0.083	0.087	0.118	0.069	0.085	0.066	0.073	0.062	0.082	0.076	0.063
23.75	0.079	0.081	0.065	0.091	0.077	0.086	0.072	0.073	0.082	0.083	0.078	0.071	0.107	0.088	0.096	0.072	0.074	0.068	0.072	0.077	0.068	0.072	0.083	0.082	0.092	0.084	0.082	0.089	0.113	0.07	0.084	0.065	0.075	0.06	0.082	0.075	0.062
24	0.08	0.081	0.067	0.093	0.073	0.087	0.075	0.075	0.081	0.082	0.077	0.078	0.106	0.09	0.094	0.069	0.076	0.073	0.072	0.075	0.063	0.074	0.086	0.081	0.088	0.086	0.076	0.09	0.109	0.068	0.082	0.066	0.072	0.06	0.079	0.076	0.064
24.25	0.076	0.075	0.068	0.092	0.073	0.089	0.077	0.074	0.082	0.08	0.075	0.066	0.104	0.086	0.093	0.068	0.071	0.073	0.073	0.076	0.064	0.072	0.079	0.077	0.082	0.084	0.076	0.086	0.105	0.07	0.082	0.063	0.07	0.059	0.086	0.077	0.063
24.5	0.074	0.077	0.065	0.085	0.075	0.09	0.07	0.074	0.081	0.076	0.076	0.067	0.105	0.086	0.091	0.066	0.076	0.076	0.071	0.076	0.066	0.069	0.074	0.075	0.082	0.083	0.082	0.083	0.109	0.079	0.083	0.064	0.07	0.059	0.082	0.073	0.063
24.75	0.074	0.075	0.066	0.082	0.072	0.09	0.068	0.07	0.081	0.078	0.077	0.065	0.1	0.082	0.089	0.069	0.072	0.072	0.07	0.075	0.067	0.066	0.072	0.076	0.084	0.082	0.081	0.084	0.101	0.074	0.084	0.064	0.073	0.057	0.077	0.074	0.062
25	0.074	0.076	0.066	0.086	0.072	0.088	0.067	0.069	0.082	0.078	0.073	0.065	0.093	0.085	0.089	0.067	0.075	0.076	0.072	0.075	0.066	0.066	0.073	0.075	0.08	0.08	0.078	0.086	0.1	0.072	0.082	0.061	0.072	0.057	0.082	0.071	0.061
25.25	0.071	0.077	0.066	0.084	0.067	0.086	0.068	0.07	0.081	0.077	0.075	0.066	0.093	0.085	0.093	0.062	0.081	0.074	0.07	0.078	0.068	0.065	0.073	0.074	0.082	0.079	0.075	0.084	0.097	0.072	0.08	0.063	0.069	0.055	0.078	0.071	0.06
25.5	0.073	0.074	0.063	0.082	0.065	0.082	0.067	0.071	0.079	0.077	0.071	0.064	0.097	0.077	0.09	0.062	0.077	0.067	0.07	0.078	0.066	0.068	0.073	0.073	0.08	0.077	0.074	0.079	0.097	0.068	0.076	0.064	0.069	0.052	0.076	0.072	0.059
25.75	0.075	0.072	0.058	0.079	0.065	0.085	0.067	0.072	0.076	0.076	0.067	0.059	0.097	0.083	0.088	0.059	0.073	0.067	0.07	0.076	0.064	0.069	0.07	0.071	0.079	0.076	0.073	0.082	0.1	0.065	0.079	0.061	0.068	0.055	0.074	0.07	0.056
26	0.071	0.068	0.06	0.078	0.068	0.081	0.068	0.066	0.075	0.076	0.071	0.061	0.096	0.088	0.088	0.064	0.073	0.067	0.068	0.073	0.062	0.066	0.072	0.071	0.084	0.078	0.076	0.081	0.096	0.071	0.082	0.06	0.067	0.055	0.075	0.069	0.058
26.25	0.072	0.067	0.06	0.078	0.067	0.081	0.065	0.065	0.076	0.075	0.069	0.059	0.097	0.086	0.085	0.066	0.069	0.066	0.069	0.074	0.063	0.061	0.069	0.071	0.086	0.077	0.076	0.08	0.092	0.073	0.079	0.062	0.067	0.052	0.074	0.072	0.058
26.5	0.073	0.071	0.055	0.078	0.067	0.085	0.066	0.065	0.079	0.072	0.069	0.06	0.096	0.086	0.085	0.063	0.066	0.067	0.07	0.077	0.063	0.065	0.072	0.069	0.087	0.078	0.069	0.082	0.095	0.073	0.077	0.06	0.067	0.052	0.076	0.068	0.053
26.75	0.072	0.071	0.061	0.077	0.066	0.079	0.066	0.067	0.073	0.073	0.074	0.062	0.098	0.088	0.083	0.06	0.071	0.061	0.069	0.075	0.06	0.067	0.072	0.07	0.086	0.077	0.073	0.082	0.098	0.069	0.075	0.06	0.068	0.052	0.075	0.069	0.052
27	0.071	0.067	0.063	0.079	0.064	0.083	0.068	0.064	0.072	0.067	0.075	0.066	0.096	0.092	0.083	0.057	0.077	0.065	0.067	0.073	0.06	0.067	0.075	0.068	0.088	0.078	0.074	0.079	0.094	0.065	0.074	0.06	0.066	0.049	0.075	0.07	0.056
27.25	0.072	0.07	0.066	0.078	0.063	0.079	0.071	0.061	0.074	0.068	0.072	0.061	0.093	0.084	0.084	0.061	0.07	0.067	0.064	0.072	0.059	0.061	0.075	0.067	0.085	0.078	0.075	0.077	0.092	0.067	0.076	0.059	0.066	0.05	0.075	0.068	0.057
27.5	0.07	0.07	0.062	0.077	0.063	0.082	0.068	0.06	0.074	0.07	0.066	0.057	0.091	0.084	0.083	0.06	0.069	0.064	0.064	0.072	0.059	0.061	0.074	0.069	0.087	0.074	0.075	0.071	0.091	0.066	0.075	0.059	0.065	0.05	0.08	0.068	0.057
27.75	0.068	0.063	0.061	0.075	0.064	0.078	0.066	0.063	0.072	0.069	0.068	0.056	0.086	0.083	0.084	0.061	0.073	0.061	0.067	0.072	0.062	0.061	0.068	0.066	0.085	0.072	0.074	0.072	0.091	0.065	0.074	0.06	0.066	0.049	0.072	0.067	0.052
28	0.069	0.062	0.058	0.073	0.063	0.078	0.061	0.064	0.072	0.067	0.07	0.057	0.087	0.083	0.082	0.061	0.069	0.062	0.067	0.071	0.061	0.059	0.069	0.067	0.082	0.075	0.074	0.075	0.092	0.066	0.073	0.061	0.066	0.048	0.073	0.068	0.053
28.25	0.066	0.066	0.057	0.073	0.064	0.08	0.063	0.063	0.071	0.067	0.067	0.059	0.088	0.081	0.083	0.059	0.063	0.062	0.064	0.07	0.063	0.064	0.071	0.066	0.08	0.075	0.07	0.078	0.09	0.066	0.072	0.06	0.067	0.047	0.078	0.068	0.054
28.5	0.065	0.067	0.055	0.073	0.065	0.082	0.063	0.062	0.072	0.066	0.067	0.056	0.086	0.082	0.084	0.058	0.07	0.063	0.065	0.072	0.062	0.065	0.07	0.065	0.077	0.074	0.073	0.079	0.086	0.07	0.068	0.058	0.065	0.047	0.079	0.067	0.055
28.75	0.067	0.064	0.059	0.074	0.065	0.079	0.063	0.064	0.073	0.067	0.068	0.055	0.084	0.09	0.081	0.059	0.07	0.058	0.063	0.07	0.06	0.061	0.067	0.066	0.078	0.074	0.069	0.075	0.087	0.068	0.068	0.059	0.063	0.046	0.072	0.065	0.059
29	0.069	0.064	0.061	0.071	0.064	0.076	0.063	0.061	0.068	0.067	0.067	0.06	0.082	0.087	0.079	0.055	0.066	0.057	0.063	0.073	0.056	0.057	0.069	0.066	0.085	0.072	0.069	0.076	0.088	0.071	0.069	0.059	0.065	0.046	0.071	0.068	0.057
29.25	0.069	0.063	0.062	0.069	0.065	0.073	0.062	0.062	0.068	0.068	0.069	0.054	0.082	0.079	0.076	0.056	0.065	0.059	0.065	0.07	0.059	0.056	0.071	0.065	0.09	0.072	0.073	0.072	0.086	0.066	0.07	0.058	0.063	0.046	0.071	0.066	0.058
29.5	0.066	0.063	0.064	0.071	0.063	0.075	0.06	0.061	0.068	0.068	0.069	0.054	0.079	0.082	0.078	0.059	0.065	0.06	0.063	0.069	0.059	0.06	0.073	0.062	0.081	0.071	0.069	0.072	0.081	0.061	0.07	0.056	0.064	0.047	0.065	0.068	0.062
29.75	0.066	0.066	0.063	0.07	0.063	0.077	0.061	0.062	0.069	0.066	0.07	0.058	0.081	0.079	0.076	0.058	0.063	0.058	0.061	0.069	0.06	0.057	0.069	0.063	0.082	0.073	0.072	0.071	0.08	0.066	0.068	0.057	0.064	0.048	0.065	0.065	0.057
30	0.066	0.066	0.057	0.07	0.064	0.077	0.062	0.06	0.067	0.064	0.07	0.057	0.078	0.085	0.077	0.059	0.065	0.057	0.06	0.069	0.058	0.052	0.069	0.064	0.084	0.074	0.072	0.068	0.081	0.065	0.067	0.056	0.064	0.045	0.065	0.065	0.059
30.25	0.067	0.066	0.06	0.071	0.062	0.075	0.062	0.058	0.066	0.065	0.065	0.053	0.079	0.083	0.076	0.058	0.065	0.057	0.06	0.066	0.059	0.054	0.067	0.061	0.084	0.073	0.072	0.068	0.08	0.063	0.068	0.057	0.062	0.044	0.065	0.063	0.056
30.5	0.068	0.063	0.059	0.072	0.062	0.074	0.062	0.06	0.067	0.065	0.065	0.053	0.08	0.08	0.072	0.057	0.064	0.063	0.06	0.07	0.061	0.055	0.068	0.064	0.083	0.072	0.068	0.066	0.075	0.063	0.065	0.055	0.063	0.045	0.067	0.059	0.056
30.75	0.068	0.06	0.058	0.071	0.062	0.073	0.062	0.058	0.069	0.066	0.067	0.049	0.077	0.088	0.071	0.057	0.063	0.065	0.061	0.068	0.063	0.058	0.069	0.062	0.084	0.071	0.066	0.066	0.078	0.066	0.063	0.053	0.061	0.043	0.068	0.06	0.053
31	0.066	0.063	0.058	0.069	0.066	0.071	0.062	0.056	0.07	0.064	0.069	0.052	0.076	0.087	0.074	0.057	0.062	0.061	0.058	0.066	0.062	0.058	0.067	0.064	0.089	0.073	0.069	0.064	0.08	0.064	0.064	0.055	0.06	0.043	0.064	0.061	0.057
31.25	0.064	0.067	0.055	0.07	0.064	0.076	0.062	0.058	0.067	0.064	0.065	0.051	0.073	0.089	0.075	0.056	0.065	0.057	0.058	0.07	0.062	0.057	0.07	0.061	0.091	0.072	0.068	0.062	0.074	0.064	0.065	0.056	0.061	0.044	0.066	0.058	0.058
31.5	0.064	0.062	0.053	0.07	0.061	0.073	0.058	0.059	0.068	0.065	0.066	0.052	0.072	0.083	0.073	0.056	0.066	0.057	0.061	0.068	0.062	0.058	0.071	0.061	0.086	0.069	0.067	0.068	0.074	0.062	0.061	0.056	0.06	0.044	0.064	0.056	0.056
31.75	0.067	0.059	0.056	0.067	0.06	0.07	0.059	0.057	0.066	0.065	0.067	0.055	0.071	0.079	0.071	0.055	0.069	0.055	0.059	0.066	0.061	0.058	0.072	0.06	0.087	0.069	0.068	0.065	0.07	0.061	0.062	0.057	0.061	0.045	0.065	0.057	0.052
32	0.068	0.065	0.057	0.068	0.06	0.072	0.06	0.058	0.065	0.063	0.068	0.067	0.079	0.09	0.075	0.056	0.067	0.058	0.059	0.068	0.06	0.055	0.07	0.06	0.086	0.069	0.072	0.063	0.07	0.063	0.064	0.059	0.059	0.043	0.062	0.056	0.062
32.25	0.068	0.063	0.065	0.07	0.062	0.074	0.057	0.058	0.067	0.061	0.066	0.058	0.072	0.088	0.072	0.054	0.063	0.06	0.058	0.068	0.057	0.053	0.068	0.06	0.088	0.069	0.071	0.063	0.071	0.06	0.062	0.056	0.059	0.043	0.06	0.054	0.056
32.5	0.068	0.069	0.064	0.069	0.062	0.071	0.06	0.06	0.067	0.063	0.067	0.053	0.068	0.09	0.072	0.052	0.064	0.058	0.058	0.066	0.057	0.055	0.069	0.061	0.088	0.068	0.066	0.061	0.07	0.062	0.061	0.053	0.06	0.043	0.062	0.053	0.057
32.75	0.065	0.066	0.062	0.067	0.06	0.074	0.06	0.061	0.067	0.061	0.068	0.05	0.068	0.087	0.072	0.055	0.064	0.057	0.057	0.069	0.057	0.06	0.067	0.063	0.079	0.069	0.066	0.059	0.069	0.069	0.061	0.053	0.058	0.042	0.062	0.053	0.058
33	0.066	0.067	0.054	0.069	0.062	0.074	0.06	0.057	0.066	0.062	0.064	0.051	0.07	0.079	0.071	0.055	0.065	0.057	0.058	0.069	0.056	0.056	0.068	0.063	0.079	0.071	0.066	0.057	0.068	0.064	0.061	0.055	0.059	0.043	0.061	0.055	0.061
33.25	0.063	0.068	0.055	0.069	0.061	0.07	0.061	0.059	0.067	0.066	0.062	0.056	0.069	0.076	0.07	0.055	0.066	0.059	0.059	0.072	0.057	0.056	0.069	0.059	0.084	0.07	0.066	0.06	0.068	0.063	0.059	0.055	0.058	0.043	0.067	0.053	0.06
33.5	0.065	0.067	0.053	0.069	0.062	0.072	0.063	0.057	0.065	0.066	0.065	0.052	0.069	0.077	0.072	0.052	0.068	0.058	0.057	0.072	0.059	0.057	0.071	0.059	0.084	0.071	0.068	0.06	0.068	0.066	0.057	0.057	0.059	0.043	0.066	0.056	0.061
33.75	0.067	0.064	0.058	0.067	0.065	0.075	0.058	0.057	0.065	0.064	0.065	0.052	0.066	0.08	0.068	0.052	0.065	0.055	0.059	0.069	0.059	0.056	0.071	0.059	0.086	0.067	0.067	0.059	0.067	0.066	0.055	0.057	0.061	0.042	0.065	0.055	0.056
34	0.066	0.065	0.059	0.068	0.063	0.076	0.058	0.059	0.065	0.062	0.067	0.054	0.071	0.076	0.069	0.057	0.064	0.058	0.058	0.071	0.06	0.058	0.071	0.059	0.083	0.068	0.066	0.06	0.068	0.062	0.056	0.055	0.056	0.042	0.063	0.053	0.055
34.25	0.063	0.069	0.061	0.067	0.062	0.073	0.058	0.06	0.063	0.062	0.062	0.05	0.072	0.074	0.067	0.059	0.066	0.056	0.057	0.069	0.062	0.056	0.065	0.06	0.088	0.069	0.065	0.058	0.064	0.059	0.056	0.054	0.057	0.041	0.063	0.05	0.056
34.5	0.063	0.067	0.058	0.067	0.065	0.072	0.061	0.061	0.063	0.062	0.062	0.051	0.073	0.072	0.066	0.059	0.072	0.056	0.06	0.071	0.063	0.057	0.068	0.059	0.089	0.068	0.064	0.057	0.065	0.061	0.056	0.054	0.059	0.042	0.062	0.052	0.054
34.75	0.065	0.066	0.058	0.068	0.066	0.071	0.059	0.06	0.063	0.061	0.064	0.054	0.07	0.078	0.068	0.055	0.064	0.052	0.062	0.068	0.059	0.056	0.07	0.057	0.087	0.066	0.068	0.058	0.065	0.059	0.057	0.055	0.059	0.042	0.063	0.053	0.052
35	0.065	0.065	0.055	0.07	0.064	0.071	0.059	0.059	0.061	0.061	0.063	0.054	0.069	0.075	0.07	0.055	0.062	0.051	0.06	0.068	0.056	0.055	0.069	0.06	0.088	0.07	0.066	0.06	0.065	0.06	0.055	0.054	0.059	0.043	0.063	0.049	0.055
35.25	0.067	0.064	0.055	0.07	0.063	0.073	0.061	0.058	0.061	0.062	0.062	0.047	0.07	0.068	0.067	0.056	0.063	0.052	0.059	0.072	0.058	0.057	0.066	0.059	0.088	0.07	0.066	0.058	0.06	0.061	0.056	0.055	0.058	0.042	0.063	0.051	0.056
35.5	0.065	0.069	0.058	0.07	0.065	0.073	0.06	0.056	0.065	0.062	0.061	0.047	0.067	0.071	0.068	0.056	0.069	0.054	0.058	0.073	0.06	0.056	0.068	0.058	0.087	0.066	0.069	0.056	0.062	0.058	0.055	0.057	0.056	0.042	0.062	0.051	0.058
35.75	0.066	0.066	0.06	0.068	0.065	0.073	0.06	0.059	0.066	0.064	0.062	0.052	0.066	0.069	0.067	0.053	0.064	0.058	0.059	0.071	0.059	0.055	0.069	0.059	0.096	0.067	0.067	0.055	0.06	0.059	0.053	0.055	0.057	0.042	0.06	0.05	0.056
36	0.067	0.068	0.058	0.067	0.066	0.071	0.06	0.059	0.064	0.062	0.065	0.052	0.066	0.074	0.067	0.051	0.065	0.054	0.062	0.072	0.058	0.055	0.072	0.058	0.097	0.071	0.066	0.054	0.062	0.059	0.053	0.056	0.057	0.043	0.059	0.053	0.054
36.25	0.066	0.068	0.059	0.067	0.064	0.072	0.06	0.059	0.065	0.063	0.061	0.054	0.067	0.077	0.066	0.053	0.07	0.053	0.062	0.078	0.058	0.055	0.07	0.057	0.089	0.068	0.066	0.055	0.061	0.057	0.053	0.057	0.057	0.043	0.063	0.051	0.054
36.5	0.063	0.069	0.053	0.068	0.067	0.075	0.061	0.058	0.063	0.063	0.065	0.051	0.067	0.071	0.067	0.051	0.068	0.053	0.058	0.077	0.058	0.055	0.067	0.059	0.096	0.064	0.068	0.057	0.061	0.062	0.051	0.056	0.057	0.04	0.063	0.049	0.052
36.75	0.064	0.071	0.056	0.07	0.068	0.079	0.062	0.059	0.064	0.063	0.066	0.049	0.068	0.071	0.067	0.052	0.065	0.056	0.059	0.075	0.06	0.055	0.067	0.059	0.096	0.066	0.067	0.055	0.06	0.059	0.05	0.056	0.058	0.039	0.061	0.047	0.047
37	0.065	0.069	0.056	0.069	0.063	0.074	0.061	0.059	0.064	0.065	0.063	0.048	0.067	0.074	0.069	0.051	0.063	0.055	0.059	0.077	0.058	0.054	0.067	0.058	0.097	0.066	0.067	0.055	0.061	0.061	0.049	0.056	0.058	0.041	0.058	0.046	0.051
37.25	0.066	0.066	0.058	0.071	0.06	0.073	0.059	0.058	0.063	0.066	0.062	0.047	0.068	0.079	0.069	0.05	0.067	0.056	0.059	0.074	0.058	0.056	0.066	0.058	0.098	0.066	0.065	0.055	0.059	0.062	0.051	0.057	0.055	0.041	0.06	0.045	0.054
37.5	0.066	0.063	0.057	0.071	0.063	0.076	0.061	0.058	0.065	0.067	0.065	0.048	0.065	0.079	0.066	0.048	0.071	0.054	0.059	0.073	0.059	0.056	0.066	0.057	0.091	0.065	0.064	0.054	0.058	0.061	0.052	0.054	0.055	0.041	0.062	0.046	0.052
37.75	0.067	0.064	0.059	0.067	0.063	0.071	0.061	0.062	0.063	0.065	0.064	0.047	0.065	0.073	0.065	0.048	0.067	0.05	0.059	0.074	0.059	0.055	0.071	0.059	0.097	0.063	0.063	0.052	0.06	0.062	0.05	0.055	0.058	0.041	0.062	0.045	0.05
38	0.067	0.068	0.059	0.065	0.062	0.072	0.061	0.061	0.062	0.063	0.066	0.046	0.064	0.067	0.068	0.046	0.066	0.047	0.06	0.072	0.062	0.056	0.07	0.057	0.094	0.065	0.062	0.052	0.061	0.063	0.05	0.055	0.057	0.04	0.062	0.043	0.054
38.25	0.068	0.067	0.056	0.066	0.065	0.076	0.063	0.06	0.064	0.066	0.063	0.047	0.068	0.07	0.066	0.048	0.068	0.05	0.057	0.074	0.062	0.055	0.071	0.059	0.096	0.066	0.065	0.051	0.059	0.058	0.05	0.053	0.057	0.039	0.06	0.045	0.054
38.5	0.068	0.068	0.054	0.068	0.064	0.075	0.064	0.061	0.065	0.067	0.066	0.046	0.066	0.067	0.065	0.048	0.061	0.049	0.058	0.074	0.057	0.054	0.074	0.06	0.099	0.064	0.063	0.05	0.058	0.058	0.048	0.051	0.055	0.038	0.057	0.045	0.053
38.75	0.068	0.067	0.054	0.066	0.062	0.073	0.06	0.06	0.064	0.067	0.065	0.048	0.063	0.062	0.064	0.051	0.06	0.047	0.057	0.074	0.055	0.055	0.073	0.059	0.1	0.064	0.063	0.053	0.058	0.058	0.047	0.053	0.055	0.038	0.057	0.044	0.052
39	0.068	0.065	0.057	0.066	0.062	0.072	0.062	0.058	0.063	0.068	0.066	0.047	0.064	0.065	0.066	0.049	0.062	0.051	0.06	0.071	0.057	0.058	0.069	0.059	0.1	0.064	0.062	0.051	0.056	0.06	0.046	0.051	0.055	0.038	0.059	0.044	0.054
39.25	0.068	0.066	0.057	0.066	0.066	0.072	0.063	0.061	0.06	0.068	0.065	0.046	0.065	0.058	0.063	0.049	0.066	0.047	0.058	0.069	0.058	0.054	0.069	0.059	0.102	0.065	0.065	0.05	0.057	0.059	0.047	0.051	0.054	0.038	0.061	0.041	0.052
39.5	0.069	0.065	0.057	0.066	0.065	0.073	0.064	0.06	0.061	0.066	0.063	0.048	0.06	0.058	0.063	0.05	0.066	0.047	0.055	0.073	0.058	0.052	0.069	0.06	0.105	0.065	0.062	0.049	0.055	0.057	0.047	0.051	0.052	0.037	0.056	0.04	0.048
39.75	0.07	0.066	0.055	0.069	0.065	0.072	0.063	0.058	0.063	0.066	0.062	0.045	0.062	0.056	0.062	0.049	0.069	0.05	0.057	0.073	0.06	0.053	0.068	0.058	0.098	0.065	0.06	0.046	0.058	0.055	0.047	0.052	0.052	0.036	0.052	0.042	0.048
40	0.068	0.07	0.057	0.071	0.065	0.068	0.064	0.058	0.064	0.066	0.065	0.048	0.062	0.059	0.062	0.048	0.064	0.047	0.057	0.072	0.06	0.051	0.068	0.057	0.092	0.067	0.06	0.048	0.059	0.055	0.045	0.051	0.053	0.037	0.052	0.043	0.047
40.25	0.068	0.071	0.056	0.066	0.065	0.072	0.067	0.061	0.064	0.067	0.064	0.046	0.061	0.063	0.063	0.045	0.064	0.049	0.056	0.073	0.059	0.051	0.07	0.058	0.096	0.068	0.06	0.046	0.057	0.055	0.044	0.05	0.051	0.036	0.052	0.042	0.048
40.5	0.069	0.07	0.056	0.065	0.064	0.076	0.067	0.058	0.064	0.068	0.057	0.047	0.071	0.056	0.062	0.044	0.07	0.049	0.056	0.074	0.057	0.051	0.066	0.057	0.101	0.066	0.06	0.046	0.055	0.057	0.043	0.048	0.05	0.035	0.05	0.043	0.046
40.75	0.069	0.068	0.053	0.067	0.061	0.075	0.065	0.059	0.064	0.069	0.057	0.045	0.062	0.057	0.062	0.048	0.063	0.048	0.055	0.073	0.056	0.052	0.065	0.059	0.099	0.066	0.06	0.045	0.056	0.055	0.044	0.048	0.05	0.035	0.052	0.043	0.044
41	0.071	0.068	0.051	0.069	0.064	0.077	0.064	0.059	0.063	0.068	0.059	0.045	0.061	0.056	0.059	0.048	0.061	0.046	0.054	0.068	0.054	0.053	0.064	0.059	0.101	0.066	0.059	0.045	0.054	0.057	0.045	0.047	0.05	0.035	0.051	0.041	0.045
41.25	0.068	0.068	0.057	0.066	0.063	0.074	0.065	0.058	0.062	0.068	0.056	0.045	0.063	0.057	0.059	0.046	0.059	0.048	0.055	0.069	0.055	0.05	0.067	0.059	0.102	0.063	0.055	0.046	0.054	0.055	0.044	0.046	0.052	0.036	0.052	0.039	0.047
41.5	0.069	0.069	0.052	0.068	0.067	0.074	0.064	0.058	0.063	0.067	0.058	0.046	0.064	0.055	0.06	0.046	0.064	0.047	0.052	0.071	0.058	0.053	0.065	0.056	0.101	0.063	0.053	0.044	0.053	0.054	0.041	0.046	0.052	0.035	0.051	0.039	0.044
41.75	0.071	0.068	0.049	0.068	0.063	0.07	0.065	0.059	0.065	0.07	0.06	0.052	0.068	0.061	0.059	0.045	0.065	0.05	0.055	0.068	0.059	0.051	0.064	0.057	0.103	0.062	0.054	0.045	0.051	0.055	0.042	0.045	0.05	0.034	0.053	0.04	0.04
42	0.069	0.066	0.052	0.066	0.064	0.075	0.066	0.058	0.062	0.069	0.058	0.075	0.071	0.075	0.056	0.047	0.06	0.046	0.055	0.065	0.061	0.051	0.061	0.057	0.108	0.064	0.055	0.046	0.053	0.068	0.041	0.047	0.05	0.034	0.053	0.039	0.042
42.25	0.07	0.071	0.055	0.067	0.06	0.073	0.067	0.058	0.065	0.065	0.06	0.052	0.061	0.057	0.055	0.044	0.06	0.044	0.052	0.067	0.057	0.055	0.064	0.055	0.111	0.063	0.053	0.046	0.053	0.056	0.04	0.046	0.05	0.034	0.05	0.038	0.043
42.5	0.068	0.068	0.054	0.068	0.065	0.073	0.067	0.061	0.064	0.066	0.061	0.041	0.06	0.06	0.054	0.043	0.062	0.044	0.05	0.062	0.056	0.056	0.065	0.057	0.109	0.064	0.053	0.044	0.051	0.052	0.04	0.044	0.047	0.033	0.047	0.038	0.041
42.75	0.066	0.068	0.054	0.071	0.066	0.073	0.063	0.061	0.063	0.069	0.058	0.041	0.059	0.061	0.055	0.039	0.061	0.043	0.05	0.067	0.056	0.05	0.066	0.058	0.107	0.065	0.056	0.042	0.051	0.055	0.039	0.043	0.047	0.034	0.048	0.038	0.041
43	0.066	0.069	0.055	0.068	0.066	0.075	0.067	0.059	0.061	0.068	0.054	0.042	0.058	0.056	0.056	0.042	0.062	0.042	0.05	0.067	0.054	0.047	0.064	0.055	0.102	0.061	0.057	0.039	0.049	0.051	0.041	0.045	0.047	0.033	0.049	0.038	0.042
43.25	0.071	0.073	0.054	0.065	0.063	0.074	0.067	0.059	0.062	0.068	0.054	0.042	0.057	0.051	0.054	0.043	0.062	0.045	0.05	0.065	0.056	0.046	0.063	0.055	0.102	0.06	0.056	0.043	0.049	0.05	0.04	0.044	0.046	0.032	0.045	0.038	0.045
43.5	0.071	0.07	0.054	0.062	0.062	0.072	0.066	0.057	0.06	0.068	0.054	0.039	0.06	0.048	0.053	0.04	0.063	0.043	0.049	0.064	0.053	0.048	0.062	0.054	0.098	0.059	0.055	0.043	0.051	0.05	0.039	0.042	0.046	0.032	0.045	0.037	0.042
43.75	0.069	0.072	0.054	0.062	0.061	0.074	0.066	0.059	0.06	0.069	0.054	0.039	0.056	0.042	0.053	0.041	0.059	0.043	0.05	0.064	0.054	0.047	0.065	0.053	0.1	0.061	0.054	0.041	0.049	0.049	0.038	0.044	0.044	0.031	0.047	0.037	0.04
44	0.068	0.069	0.049	0.063	0.061	0.071	0.064	0.057	0.061	0.067	0.054	0.04	0.055	0.045	0.052	0.042	0.059	0.041	0.049	0.064	0.055	0.047	0.063	0.053	0.103	0.06	0.053	0.039	0.047	0.053	0.039	0.043	0.043	0.03	0.046	0.036	0.038
44.25	0.069	0.065	0.046	0.065	0.061	0.07	0.066	0.056	0.061	0.068	0.055	0.041	0.056	0.052	0.052	0.04	0.058	0.04	0.05	0.064	0.055	0.048	0.061	0.052	0.099	0.06	0.051	0.039	0.049	0.053	0.038	0.041	0.045	0.03	0.046	0.036	0.04
44.5	0.069	0.069	0.051	0.064	0.062	0.072	0.065	0.058	0.06	0.067	0.054	0.042	0.057	0.053	0.053	0.038	0.059	0.046	0.048	0.061	0.051	0.051	0.063	0.053	0.099	0.06	0.051	0.041	0.049	0.052	0.037	0.041	0.045	0.03	0.043	0.036	0.038
44.75	0.067	0.071	0.053	0.065	0.06	0.075	0.065	0.059	0.06	0.066	0.052	0.042	0.058	0.05	0.051	0.04	0.058	0.046	0.046	0.065	0.055	0.049	0.06	0.054	0.099	0.056	0.054	0.041	0.045	0.053	0.037	0.04	0.044	0.029	0.04	0.036	0.037
45	0.066	0.07	0.047	0.063	0.061	0.074	0.065	0.058	0.058	0.069	0.051	0.039	0.097	0.045	0.05	0.04	0.064	0.043	0.046	0.064	0.053	0.048	0.058	0.053	0.104	0.057	0.051	0.039	0.045	0.051	0.035	0.041	0.057	0.029	0.04	0.035	0.037
55	0.05	0.065	0.042	0.05	0.045	0.064	0.056	0.046	0.044	0.057	0.034	0.033	0.049	0.035	0.035	0.033	0.053	0.038	0.039	0.05	0.045	0.035	0.049	0.041	0.073	0.053	0.039	0.034	0.037	0.043	0.03	0.029	0.031	0.019	0.032	0.027	0.022				0.05	0.065	0.042	0.05	0.045	0.064	0.056	0.046	0.044
55.25	0.051	0.064	0.043	0.047	0.045	0.061	0.057	0.046	0.044	0.057	0.035	0.031	0.048	0.037	0.034	0.033	0.056	0.04	0.04	0.051	0.044	0.036	0.047	0.041	0.075	0.05	0.039	0.035	0.035	0.046	0.029	0.029	0.029	0.019	0.032	0.025	0.023				0.051	0.064	0.043	0.047	0.045	0.061	0.057	0.046	0.044
55.5	0.049	0.063	0.043	0.048	0.045	0.061	0.057	0.046	0.043	0.058	0.035	0.032	0.045	0.038	0.032	0.033	0.054	0.037	0.038	0.051	0.047	0.034	0.048	0.041	0.076	0.05	0.038	0.034	0.036	0.046	0.03	0.028	0.03	0.019	0.029	0.025	0.025				0.049	0.063	0.043	0.048	0.045	0.061	0.057	0.046	0.043
55.75	0.05	0.064	0.043	0.048	0.047	0.06	0.056	0.046	0.042	0.056	0.035	0.03	0.047	0.04	0.032	0.033	0.049	0.035	0.039	0.048	0.043	0.032	0.046	0.042	0.077	0.053	0.037	0.033	0.036	0.046	0.029	0.028	0.031	0.018	0.027	0.025	0.027				0.05	0.064	0.043	0.048	0.047	0.06	0.056	0.046	0.042
56	0.051	0.065	0.044	0.048	0.046	0.06	0.054	0.044	0.041	0.057	0.034	0.03	0.047	0.043	0.033	0.033	0.046	0.036	0.037	0.047	0.041	0.033	0.046	0.041	0.075	0.053	0.038	0.032	0.037	0.044	0.029	0.027	0.032	0.019	0.028	0.026	0.025				0.051	0.065	0.044	0.048	0.046	0.06	0.054	0.044	0.041
56.25	0.05	0.065	0.043	0.048	0.043	0.063	0.054	0.042	0.041	0.056	0.033	0.031	0.046	0.042	0.033	0.032	0.051	0.033	0.04	0.048	0.042	0.034	0.048	0.041	0.073	0.052	0.037	0.033	0.037	0.044	0.028	0.028	0.031	0.018	0.03	0.025	0.024				0.05	0.065	0.043	0.048	0.043	0.063	0.054	0.042	0.041
56.5	0.049	0.062	0.041	0.045	0.045	0.063	0.053	0.042	0.042	0.054	0.032	0.031	0.05	0.039	0.034	0.033	0.05	0.03	0.038	0.049	0.042	0.032	0.048	0.04	0.075	0.05	0.038	0.034	0.036	0.041	0.028	0.027	0.031	0.019	0.029	0.024	0.025				0.049	0.062	0.041	0.045	0.045	0.063	0.053	0.042	0.042
56.75	0.048	0.064	0.039	0.045	0.046	0.062	0.054	0.042	0.042	0.056	0.032	0.033	0.05	0.037	0.034	0.032	0.052	0.032	0.038	0.05	0.042	0.032	0.049	0.04	0.076	0.051	0.038	0.031	0.036	0.041	0.03	0.026	0.03	0.018	0.028	0.024	0.024				0.048	0.064	0.039	0.045	0.046	0.062	0.054	0.042	0.042
57	0.049	0.064	0.042	0.047	0.045	0.059	0.053	0.043	0.042	0.056	0.031	0.03	0.046	0.036	0.033	0.031	0.051	0.033	0.038	0.049	0.041	0.031	0.05	0.04	0.071	0.051	0.037	0.032	0.037	0.043	0.031	0.026	0.03	0.018	0.027	0.024	0.022				0.049	0.064	0.042	0.047	0.045	0.059	0.053	0.043	0.042
57.25	0.048	0.063	0.041	0.047	0.045	0.061	0.051	0.043	0.04	0.056	0.032	0.031	0.044	0.038	0.032	0.032	0.052	0.036	0.038	0.048	0.04	0.032	0.046	0.039	0.072	0.052	0.037	0.035	0.037	0.045	0.03	0.026	0.03	0.018	0.029	0.024	0.022				0.048	0.063	0.041	0.047	0.045	0.061	0.051	0.043	0.04
57.5	0.047	0.066	0.039	0.046	0.044	0.061	0.051	0.044	0.041	0.055	0.03	0.035	0.047	0.037	0.033	0.03	0.052	0.036	0.038	0.049	0.041	0.032	0.046	0.038	0.077	0.051	0.036	0.035	0.035	0.044	0.03	0.025	0.029	0.018	0.029	0.024	0.024				0.047	0.066	0.039	0.046	0.044	0.061	0.051	0.044	0.041
57.75	0.046	0.063	0.04	0.044	0.043	0.058	0.055	0.045	0.042	0.056	0.031	0.056	0.048	0.052	0.034	0.031	0.052	0.034	0.038	0.05	0.043	0.033	0.046	0.039	0.079	0.052	0.038	0.036	0.035	0.054	0.028	0.026	0.029	0.017	0.029	0.025	0.025				0.046	0.063	0.04	0.044	0.043	0.058	0.055	0.045	0.042
58	0.045	0.058	0.037	0.044	0.041	0.062	0.057	0.043	0.041	0.056	0.029	0.036	0.047	0.041	0.031	0.028	0.052	0.032	0.036	0.047	0.042	0.034	0.045	0.039	0.076	0.051	0.037	0.034	0.035	0.044	0.028	0.026	0.029	0.017	0.028	0.024	0.023				0.045	0.058	0.037	0.044	0.041	0.062	0.057	0.043	0.041
58.25	0.046	0.062	0.039	0.046	0.04	0.059	0.055	0.044	0.04	0.057	0.03	0.03	0.047	0.037	0.031	0.028	0.05	0.032	0.036	0.045	0.04	0.031	0.045	0.038	0.069	0.049	0.036	0.035	0.035	0.042	0.027	0.027	0.028	0.018	0.028	0.024	0.022				0.046	0.062	0.039	0.046	0.04	0.059	0.055	0.044	0.04
58.5	0.046	0.059	0.037	0.042	0.042	0.056	0.052	0.041	0.04	0.056	0.03	0.029	0.046	0.038	0.031	0.03	0.049	0.032	0.036	0.048	0.04	0.029	0.046	0.038	0.07	0.048	0.037	0.034	0.034	0.039	0.027	0.025	0.028	0.017	0.028	0.024	0.023				0.046	0.059	0.037	0.042	0.042	0.056	0.052	0.041	0.04
58.75	0.045	0.057	0.037	0.043	0.042	0.058	0.052	0.042	0.04	0.055	0.03	0.028	0.047	0.036	0.03	0.033	0.054	0.033	0.035	0.049	0.039	0.03	0.046	0.038	0.072	0.05	0.035	0.033	0.035	0.038	0.029	0.025	0.029	0.017	0.028	0.023	0.023				0.045	0.057	0.037	0.043	0.042	0.058	0.052	0.042	0.04
59	0.047	0.059	0.04	0.041	0.039	0.059	0.052	0.041	0.04	0.056	0.03	0.028	0.044	0.035	0.03	0.03	0.054	0.032	0.036	0.05	0.038	0.033	0.045	0.038	0.067	0.051	0.035	0.032	0.034	0.039	0.029	0.025	0.028	0.017	0.027	0.022	0.021				0.047	0.059	0.04	0.041	0.039	0.059	0.052	0.041	0.04
59.25	0.046	0.058	0.038	0.041	0.039	0.057	0.052	0.042	0.04	0.056	0.03	0.029	0.048	0.034	0.03	0.029	0.051	0.031	0.037	0.047	0.04	0.033	0.045	0.039	0.064	0.049	0.034	0.033	0.036	0.037	0.028	0.025	0.027	0.017	0.026	0.022	0.021				0.046	0.058	0.038	0.041	0.039	0.057	0.052	0.042	0.04
59.5	0.044	0.062	0.034	0.041	0.042	0.057	0.05	0.043	0.039	0.056	0.03	0.029	0.045	0.035	0.029	0.028	0.051	0.03	0.037	0.046	0.041	0.031	0.046	0.038	0.07	0.048	0.033	0.033	0.035	0.036	0.027	0.025	0.027	0.017	0.026	0.024	0.02				0.044	0.062	0.034	0.041	0.042	0.057	0.05	0.043	0.039
59.75	0.042	0.061	0.034	0.041	0.04	0.059	0.05	0.042	0.038	0.057	0.029	0.027	0.044	0.034	0.029	0.028	0.05	0.032	0.037	0.046	0.04	0.032	0.045	0.037	0.069	0.047	0.034	0.031	0.035	0.037	0.027	0.024	0.028	0.016	0.025	0.022	0.02				0.042	0.061	0.034	0.041	0.04	0.059	0.05	0.042	0.038
60	0.044	0.062	0.037	0.039	0.038	0.058	0.051	0.042	0.04	0.056	0.028	0.027	0.044	0.033	0.029	0.028	0.05	0.032	0.037	0.047	0.038	0.029	0.045	0.037	0.068	0.047	0.035	0.031	0.034	0.038	0.027	0.024	0.027	0.017	0.027	0.022	0.02				0.044	0.062	0.037	0.039	0.038	0.058	0.051	0.042	0.04
60.25	0.046	0.059	0.036	0.039	0.038	0.057	0.051	0.043	0.04	0.056	0.029	0.027	0.043	0.032	0.029	0.029	0.047	0.032	0.037	0.047	0.037	0.028	0.042	0.037	0.067	0.047	0.035	0.03	0.034	0.039	0.027	0.023	0.028	0.017	0.027	0.021	0.019				0.046	0.059	0.036	0.039	0.038	0.057	0.051	0.043	0.04
60.5	0.044	0.056	0.035	0.039	0.039	0.057	0.048	0.042	0.039	0.057	0.028	0.029	0.042	0.035	0.029	0.028	0.044	0.029	0.038	0.048	0.039	0.029	0.044	0.036	0.063	0.048	0.035	0.03	0.035	0.038	0.027	0.023	0.027	0.016	0.027	0.021	0.019				0.044	0.056	0.035	0.039	0.039	0.057	0.048	0.042	0.039
60.75	0.043	0.053	0.035	0.038	0.04	0.06	0.05	0.039	0.037	0.053	0.029	0.03	0.043	0.036	0.029	0.027	0.047	0.032	0.036	0.046	0.039	0.028	0.047	0.037	0.065	0.047	0.035	0.03	0.034	0.038	0.027	0.023	0.027	0.016	0.026	0.021	0.02				0.043	0.053	0.035	0.038	0.04	0.06	0.05	0.039	0.037
61	0.043	0.05	0.035	0.037	0.04	0.057	0.051	0.038	0.038	0.052	0.028	0.027	0.041	0.034	0.028	0.028	0.048	0.033	0.035	0.043	0.037	0.027	0.046	0.037	0.066	0.045	0.036	0.032	0.033	0.038	0.027	0.023	0.027	0.017	0.025	0.021	0.019				0.043	0.05	0.035	0.037	0.04	0.057	0.051	0.038	0.038
61.25	0.042	0.055	0.033	0.039	0.038	0.052	0.052	0.04	0.037	0.055	0.028	0.03	0.042	0.034	0.027	0.027	0.045	0.031	0.036	0.045	0.039	0.027	0.044	0.037	0.06	0.046	0.035	0.032	0.032	0.037	0.026	0.022	0.026	0.016	0.027	0.021	0.018				0.042	0.055	0.033	0.039	0.038	0.052	0.052	0.04	0.037
61.5	0.041	0.055	0.037	0.038	0.037	0.051	0.05	0.038	0.037	0.055	0.028	0.03	0.045	0.033	0.027	0.027	0.044	0.029	0.036	0.044	0.038	0.028	0.043	0.035	0.064	0.045	0.033	0.031	0.032	0.039	0.026	0.022	0.026	0.016	0.027	0.02	0.019				0.041	0.055	0.037	0.038	0.037	0.051	0.05	0.038	0.037
61.75	0.041	0.054	0.034	0.036	0.036	0.056	0.049	0.038	0.038	0.054	0.028	0.028	0.043	0.032	0.027	0.026	0.044	0.029	0.034	0.043	0.036	0.027	0.044	0.035	0.06	0.045	0.034	0.031	0.033	0.041	0.026	0.022	0.026	0.015	0.025	0.021	0.018				0.041	0.054	0.034	0.036	0.036	0.056	0.049	0.038	0.038
62	0.042	0.052	0.033	0.036	0.036	0.054	0.048	0.04	0.037	0.053	0.027	0.025	0.043	0.029	0.027	0.028	0.046	0.029	0.033	0.044	0.038	0.029	0.042	0.036	0.059	0.046	0.032	0.03	0.033	0.038	0.026	0.022	0.025	0.015	0.025	0.021	0.018				0.042	0.052	0.033	0.036	0.036	0.054	0.048	0.04	0.037
62.25	0.041	0.052	0.034	0.036	0.036	0.057	0.048	0.037	0.037	0.055	0.026	0.026	0.041	0.03	0.027	0.028	0.048	0.03	0.035	0.044	0.037	0.028	0.042	0.036	0.058	0.046	0.035	0.03	0.032	0.037	0.025	0.021	0.024	0.015	0.025	0.021	0.019				0.041	0.052	0.034	0.036	0.036	0.057	0.048	0.037	0.037
62.5	0.039	0.052	0.036	0.036	0.035	0.053	0.047	0.038	0.038	0.053	0.026	0.027	0.039	0.031	0.026	0.026	0.044	0.029	0.035	0.044	0.036	0.026	0.042	0.035	0.061	0.045	0.033	0.031	0.032	0.037	0.025	0.021	0.025	0.015	0.023	0.02	0.019				0.039	0.052	0.036	0.036	0.035	0.053	0.047	0.038	0.038
62.75	0.038	0.053	0.034	0.034	0.035	0.053	0.047	0.039	0.038	0.051	0.026	0.025	0.039	0.03	0.025	0.026	0.045	0.03	0.034	0.042	0.037	0.025	0.042	0.034	0.059	0.046	0.032	0.032	0.032	0.036	0.025	0.021	0.025	0.015	0.023	0.02	0.019				0.038	0.053	0.034	0.034	0.035	0.053	0.047	0.039	0.038
63	0.038	0.051	0.031	0.034	0.034	0.052	0.048	0.038	0.036	0.053	0.025	0.024	0.042	0.032	0.026	0.025	0.051	0.03	0.035	0.041	0.036	0.026	0.042	0.034	0.058	0.045	0.032	0.03	0.032	0.033	0.025	0.021	0.024	0.014	0.024	0.02	0.018				0.038	0.051	0.031	0.034	0.034	0.052	0.048	0.038	0.036
63.25	0.039	0.051	0.031	0.035	0.034	0.05	0.047	0.037	0.036	0.053	0.024	0.026	0.041	0.032	0.026	0.024	0.052	0.029	0.035	0.041	0.036	0.027	0.039	0.035	0.054	0.043	0.033	0.029	0.032	0.035	0.026	0.021	0.025	0.015	0.024	0.019	0.017				0.039	0.051	0.031	0.035	0.034	0.05	0.047	0.037	0.036
63.5	0.039	0.05	0.033	0.034	0.034	0.051	0.048	0.036	0.035	0.051	0.025	0.025	0.039	0.03	0.025	0.023	0.048	0.027	0.034	0.041	0.036	0.026	0.041	0.034	0.055	0.044	0.033	0.029	0.031	0.036	0.025	0.02	0.025	0.015	0.024	0.019	0.019				0.039	0.05	0.033	0.034	0.034	0.051	0.048	0.036	0.035
63.75	0.036	0.05	0.032	0.033	0.033	0.051	0.047	0.036	0.034	0.049	0.026	0.027	0.041	0.033	0.026	0.026	0.045	0.026	0.034	0.041	0.035	0.025	0.042	0.034	0.057	0.044	0.032	0.029	0.031	0.035	0.025	0.021	0.023	0.014	0.024	0.019	0.02				0.036	0.05	0.032	0.033	0.033	0.051	0.047	0.036	0.034
64	0.037	0.049	0.032	0.032	0.034	0.049	0.046	0.035	0.036	0.051	0.025	0.026	0.044	0.032	0.025	0.025	0.042	0.027	0.033	0.04	0.034	0.026	0.039	0.034	0.055	0.041	0.033	0.029	0.031	0.034	0.024	0.021	0.023	0.014	0.024	0.018	0.018				0.037	0.049	0.032	0.032	0.034	0.049	0.046	0.035	0.036
64.25	0.037	0.047	0.033	0.033	0.033	0.047	0.045	0.036	0.035	0.052	0.024	0.025	0.04	0.031	0.024	0.025	0.042	0.027	0.033	0.039	0.034	0.026	0.04	0.033	0.054	0.041	0.032	0.029	0.031	0.034	0.024	0.02	0.023	0.014	0.023	0.018	0.017				0.037	0.047	0.033	0.033	0.033	0.047	0.045	0.036	0.035
64.5	0.035	0.046	0.031	0.033	0.032	0.048	0.044	0.038	0.033	0.05	0.024	0.025	0.038	0.029	0.023	0.023	0.046	0.024	0.033	0.039	0.032	0.024	0.039	0.033	0.056	0.039	0.032	0.03	0.031	0.034	0.024	0.019	0.023	0.013	0.024	0.018	0.017				0.035	0.046	0.031	0.033	0.032	0.048	0.044	0.038	0.033
64.75	0.035	0.045	0.032	0.032	0.032	0.046	0.046	0.036	0.033	0.05	0.024	0.025	0.038	0.028	0.023	0.024	0.046	0.023	0.033	0.04	0.032	0.023	0.04	0.032	0.055	0.04	0.032	0.03	0.03	0.034	0.023	0.019	0.023	0.014	0.023	0.018	0.017				0.035	0.045	0.032	0.032	0.032	0.046	0.046	0.036	0.033
65	0.035	0.043	0.035	0.032	0.032	0.046	0.043	0.034	0.034	0.051	0.024	0.023	0.037	0.029	0.023	0.023	0.044	0.026	0.032	0.039	0.032	0.025	0.038	0.031	0.052	0.041	0.032	0.028	0.031	0.036	0.023	0.019	0.023	0.013	0.02	0.018	0.015				0.035	0.043	0.035	0.032	0.032	0.046	0.043	0.034	0.034
65.25	0.036	0.045	0.031	0.03	0.03	0.043	0.044	0.035	0.032	0.05	0.023	0.022	0.036	0.028	0.023	0.023	0.041	0.027	0.03	0.038	0.031	0.023	0.037	0.031	0.055	0.039	0.03	0.027	0.032	0.036	0.022	0.019	0.022	0.013	0.02	0.018	0.016				0.036	0.045	0.031	0.03	0.03	0.043	0.044	0.035	0.032
65.5	0.034	0.044	0.031	0.028	0.031	0.042	0.045	0.033	0.032	0.049	0.022	0.023	0.033	0.029	0.023	0.024	0.043	0.026	0.031	0.037	0.031	0.023	0.037	0.03	0.053	0.038	0.029	0.028	0.031	0.033	0.023	0.019	0.022	0.014	0.021	0.017	0.016				0.034	0.044	0.031	0.028	0.031	0.042	0.045	0.033	0.032
65.75	0.033	0.042	0.032	0.03	0.03	0.044	0.045	0.033	0.033	0.048	0.02	0.024	0.034	0.029	0.023	0.024	0.044	0.024	0.031	0.035	0.03	0.023	0.036	0.032	0.053	0.038	0.03	0.029	0.031	0.033	0.023	0.019	0.022	0.014	0.021	0.016	0.015				0.033	0.042	0.032	0.03	0.03	0.044	0.045	0.033	0.033
66	0.034	0.045	0.031	0.028	0.028	0.045	0.045	0.032	0.032	0.047	0.022	0.022	0.036	0.03	0.022	0.023	0.043	0.025	0.031	0.037	0.031	0.022	0.036	0.032	0.05	0.039	0.03	0.027	0.031	0.033	0.021	0.019	0.022	0.013	0.021	0.016	0.015				0.034	0.045	0.031	0.028	0.028	0.045	0.045	0.032	0.032
66.25	0.034	0.043	0.03	0.028	0.029	0.044	0.042	0.032	0.032	0.049	0.021	0.022	0.037	0.028	0.021	0.024	0.041	0.023	0.029	0.037	0.032	0.023	0.037	0.031	0.049	0.036	0.029	0.026	0.03	0.032	0.023	0.019	0.022	0.013	0.02	0.017	0.016				0.034	0.043	0.03	0.028	0.029	0.044	0.042	0.032	0.032
66.5	0.034	0.041	0.031	0.028	0.03	0.046	0.042	0.033	0.032	0.049	0.021	0.021	0.035	0.027	0.021	0.022	0.039	0.024	0.028	0.035	0.031	0.022	0.036	0.03	0.051	0.039	0.03	0.027	0.029	0.031	0.022	0.019	0.022	0.013	0.02	0.017	0.015				0.034	0.041	0.031	0.028	0.03	0.046	0.042	0.033	0.032
66.75	0.032	0.043	0.029	0.028	0.03	0.042	0.042	0.032	0.03	0.049	0.021	0.022	0.034	0.027	0.022	0.023	0.036	0.024	0.029	0.035	0.029	0.022	0.038	0.03	0.05	0.039	0.028	0.027	0.028	0.032	0.021	0.018	0.021	0.013	0.02	0.016	0.014				0.032	0.043	0.029	0.028	0.03	0.042	0.042	0.032	0.03
67	0.032	0.04	0.03	0.027	0.031	0.043	0.04	0.031	0.029	0.048	0.021	0.023	0.032	0.027	0.021	0.023	0.038	0.025	0.029	0.035	0.029	0.021	0.036	0.031	0.05	0.039	0.027	0.026	0.027	0.03	0.021	0.017	0.02	0.013	0.02	0.015	0.014				0.032	0.04	0.03	0.027	0.031	0.043	0.04	0.031	0.029
67.25	0.032	0.039	0.03	0.026	0.028	0.042	0.04	0.033	0.03	0.047	0.021	0.023	0.033	0.026	0.021	0.023	0.039	0.024	0.028	0.034	0.029	0.021	0.034	0.03	0.049	0.038	0.028	0.025	0.027	0.03	0.021	0.017	0.019	0.012	0.019	0.015	0.015				0.032	0.039	0.03	0.026	0.028	0.042	0.04	0.033	0.03
67.5	0.032	0.039	0.028	0.025	0.029	0.04	0.039	0.031	0.03	0.045	0.021	0.022	0.034	0.028	0.02	0.021	0.036	0.022	0.028	0.034	0.028	0.019	0.034	0.029	0.047	0.037	0.028	0.026	0.028	0.031	0.021	0.018	0.019	0.012	0.018	0.016	0.014				0.032	0.039	0.028	0.025	0.029	0.04	0.039	0.031	0.03
67.75	0.031	0.038	0.028	0.026	0.028	0.039	0.038	0.03	0.03	0.045	0.02	0.022	0.035	0.029	0.02	0.021	0.038	0.021	0.029	0.035	0.029	0.02	0.033	0.029	0.048	0.036	0.028	0.025	0.028	0.032	0.02	0.018	0.018	0.012	0.018	0.014	0.014				0.031	0.038	0.028	0.026	0.028	0.039	0.038	0.03	0.03
68	0.029	0.036	0.027	0.026	0.029	0.04	0.038	0.03	0.03	0.046	0.021	0.022	0.034	0.025	0.02	0.02	0.038	0.021	0.029	0.032	0.028	0.02	0.033	0.029	0.046	0.036	0.027	0.024	0.027	0.031	0.02	0.016	0.019	0.012	0.02	0.015	0.015				0.029	0.036	0.027	0.026	0.029	0.04	0.038	0.03	0.03
68.25	0.029	0.036	0.027	0.024	0.028	0.039	0.04	0.03	0.028	0.044	0.019	0.021	0.034	0.026	0.02	0.02	0.037	0.021	0.028	0.032	0.026	0.02	0.032	0.029	0.045	0.036	0.026	0.024	0.027	0.03	0.019	0.016	0.019	0.012	0.019	0.015	0.016				0.029	0.036	0.027	0.024	0.028	0.039	0.04	0.03	0.028
68.5	0.03	0.037	0.029	0.024	0.026	0.038	0.039	0.031	0.027	0.045	0.018	0.019	0.035	0.027	0.019	0.022	0.036	0.022	0.027	0.033	0.026	0.019	0.033	0.028	0.044	0.036	0.026	0.025	0.026	0.031	0.019	0.016	0.018	0.012	0.019	0.015	0.015				0.03	0.037	0.029	0.024	0.026	0.038	0.039	0.031	0.027
68.75	0.03	0.035	0.029	0.024	0.026	0.04	0.037	0.03	0.027	0.046	0.018	0.02	0.034	0.025	0.019	0.023	0.035	0.021	0.026	0.032	0.026	0.018	0.032	0.027	0.045	0.036	0.027	0.025	0.027	0.029	0.02	0.016	0.018	0.011	0.018	0.015	0.014				0.03	0.035	0.029	0.024	0.026	0.04	0.037	0.03	0.027
69	0.03	0.037	0.026	0.024	0.027	0.038	0.035	0.029	0.028	0.045	0.02	0.021	0.034	0.025	0.019	0.021	0.034	0.02	0.027	0.031	0.026	0.019	0.032	0.027	0.045	0.035	0.027	0.024	0.027	0.028	0.02	0.015	0.018	0.012	0.019	0.014	0.014				0.03	0.037	0.026	0.024	0.027	0.038	0.035	0.029	0.028
69.25	0.029	0.038	0.025	0.024	0.027	0.036	0.035	0.028	0.028	0.042	0.019	0.019	0.032	0.025	0.018	0.019	0.033	0.02	0.026	0.031	0.027	0.019	0.032	0.027	0.046	0.034	0.026	0.023	0.026	0.028	0.019	0.015	0.018	0.012	0.018	0.015	0.013				0.029	0.038	0.025	0.024	0.027	0.036	0.035	0.028	0.028
69.5	0.028	0.034	0.026	0.022	0.025	0.036	0.035	0.029	0.027	0.042	0.02	0.019	0.032	0.024	0.017	0.021	0.032	0.019	0.025	0.031	0.026	0.017	0.032	0.027	0.044	0.034	0.025	0.022	0.025	0.029	0.019	0.015	0.018	0.012	0.017	0.015	0.013				0.028	0.034	0.026	0.022	0.025	0.036	0.035	0.029	0.027
69.75	0.027	0.035	0.025	0.022	0.026	0.036	0.036	0.028	0.026	0.042	0.02	0.019	0.032	0.026	0.017	0.019	0.032	0.018	0.025	0.03	0.025	0.016	0.032	0.027	0.041	0.035	0.026	0.023	0.026	0.029	0.019	0.014	0.018	0.011	0.017	0.015	0.014				0.027	0.035	0.025	0.022	0.026	0.036	0.036	0.028	0.026
70	0.027	0.035	0.024	0.022	0.024	0.036	0.037	0.028	0.026	0.041	0.019	0.019	0.031	0.025	0.017	0.018	0.031	0.019	0.025	0.03	0.025	0.017	0.03	0.027	0.042	0.034	0.026	0.025	0.024	0.029	0.019	0.015	0.018	0.011	0.017	0.014	0.013				0.027	0.035	0.024	0.022	0.024	0.036	0.037	0.028	0.026
70.25	0.027	0.034	0.024	0.022	0.024	0.035	0.037	0.026	0.026	0.041	0.019	0.018	0.031	0.024	0.017	0.018	0.033	0.019	0.024	0.029	0.024	0.017	0.029	0.026	0.04	0.032	0.025	0.023	0.025	0.029	0.018	0.015	0.017	0.011	0.017	0.014	0.012				0.027	0.034	0.024	0.022	0.024	0.035	0.037	0.026	0.026
70.5	0.026	0.032	0.025	0.021	0.024	0.032	0.036	0.026	0.025	0.041	0.019	0.019	0.031	0.025	0.017	0.018	0.034	0.02	0.024	0.029	0.025	0.017	0.03	0.026	0.04	0.031	0.025	0.023	0.024	0.027	0.018	0.015	0.017	0.011	0.016	0.013	0.013				0.026	0.032	0.025	0.021	0.024	0.032	0.036	0.026	0.025
70.75	0.026	0.031	0.024	0.021	0.023	0.033	0.032	0.027	0.025	0.041	0.017	0.02	0.033	0.024	0.017	0.019	0.031	0.019	0.025	0.028	0.024	0.017	0.029	0.025	0.04	0.031	0.023	0.022	0.023	0.027	0.018	0.014	0.016	0.011	0.016	0.013	0.012				0.026	0.031	0.024	0.021	0.023	0.033	0.032	0.027	0.025
71	0.026	0.033	0.023	0.021	0.023	0.033	0.032	0.025	0.025	0.04	0.018	0.018	0.038	0.025	0.017	0.019	0.032	0.018	0.025	0.028	0.024	0.016	0.028	0.025	0.04	0.032	0.023	0.02	0.023	0.026	0.017	0.014	0.016	0.011	0.017	0.013	0.012				0.026	0.033	0.023	0.021	0.023	0.033	0.032	0.025	0.025
71.25	0.025	0.032	0.022	0.021	0.023	0.033	0.034	0.025	0.025	0.04	0.017	0.017	0.043	0.024	0.016	0.018	0.03	0.019	0.024	0.029	0.024	0.016	0.028	0.025	0.042	0.032	0.023	0.02	0.023	0.026	0.018	0.013	0.016	0.01	0.017	0.012	0.013				0.025	0.032	0.022	0.021	0.023	0.033	0.034	0.025	0.025
71.5	0.024	0.03	0.021	0.02	0.022	0.032	0.032	0.026	0.023	0.039	0.016	0.017	0.034	0.024	0.016	0.018	0.028	0.019	0.023	0.027	0.023	0.015	0.029	0.025	0.042	0.033	0.023	0.02	0.023	0.026	0.017	0.013	0.015	0.01	0.016	0.012	0.011				0.024	0.03	0.021	0.02	0.022	0.032	0.032	0.026	0.023
71.75	0.024	0.03	0.023	0.019	0.022	0.032	0.032	0.025	0.024	0.037	0.016	0.019	0.032	0.023	0.015	0.018	0.03	0.019	0.024	0.027	0.023	0.016	0.028	0.025	0.042	0.031	0.023	0.02	0.023	0.025	0.017	0.013	0.015	0.01	0.016	0.013	0.012				0.024	0.03	0.023	0.019	0.022	0.032	0.032	0.025	0.024
72	0.024	0.029	0.022	0.019	0.021	0.031	0.03	0.024	0.023	0.036	0.017	0.018	0.03	0.022	0.015	0.018	0.028	0.018	0.024	0.026	0.023	0.016	0.026	0.023	0.038	0.03	0.022	0.019	0.023	0.025	0.017	0.013	0.015	0.01	0.016	0.012	0.012				0.024	0.029	0.022	0.019	0.021	0.031	0.03	0.024	0.023
72.25	0.023	0.028	0.023	0.019	0.021	0.031	0.031	0.024	0.023	0.036	0.016	0.017	0.03	0.024	0.015	0.017	0.028	0.017	0.022	0.026	0.023	0.015	0.027	0.023	0.037	0.03	0.021	0.019	0.023	0.025	0.016	0.012	0.015	0.01	0.016	0.012	0.012				0.023	0.028	0.023	0.019	0.021	0.031	0.031	0.024	0.023
72.5	0.023	0.029	0.021	0.019	0.021	0.03	0.031	0.024	0.023	0.036	0.016	0.017	0.029	0.023	0.015	0.017	0.029	0.016	0.022	0.026	0.022	0.014	0.026	0.023	0.038	0.029	0.021	0.019	0.021	0.024	0.017	0.012	0.014	0.009	0.017	0.012	0.013				0.023	0.029	0.021	0.019	0.021	0.03	0.031	0.024	0.023
72.75	0.023	0.029	0.021	0.019	0.021	0.029	0.03	0.022	0.022	0.035	0.016	0.017	0.03	0.021	0.015	0.017	0.028	0.016	0.022	0.026	0.021	0.015	0.025	0.023	0.04	0.028	0.021	0.018	0.021	0.022	0.017	0.012	0.014	0.009	0.016	0.012	0.012				0.023	0.029	0.021	0.019	0.021	0.029	0.03	0.022	0.022
73	0.023	0.029	0.021	0.019	0.02	0.028	0.031	0.023	0.022	0.035	0.016	0.016	0.032	0.021	0.014	0.017	0.026	0.017	0.021	0.025	0.022	0.015	0.026	0.023	0.04	0.028	0.02	0.019	0.021	0.022	0.016	0.012	0.014	0.009	0.016	0.012	0.011				0.023	0.029	0.021	0.019	0.02	0.028	0.031	0.023	0.022
73.25	0.022	0.028	0.022	0.017	0.019	0.028	0.03	0.022	0.022	0.035	0.015	0.016	0.029	0.02	0.014	0.018	0.028	0.017	0.021	0.024	0.023	0.015	0.025	0.022	0.038	0.028	0.021	0.019	0.021	0.024	0.015	0.012	0.014	0.009	0.015	0.011	0.011				0.022	0.028	0.022	0.017	0.019	0.028	0.03	0.022	0.022
73.5	0.022	0.028	0.021	0.017	0.019	0.027	0.029	0.022	0.021	0.034	0.015	0.017	0.029	0.02	0.013	0.018	0.028	0.016	0.02	0.024	0.022	0.014	0.025	0.022	0.035	0.028	0.02	0.018	0.02	0.025	0.015	0.012	0.013	0.009	0.015	0.011	0.011				0.022	0.028	0.021	0.017	0.019	0.027	0.029	0.022	0.021
73.75	0.022	0.028	0.022	0.017	0.019	0.028	0.029	0.021	0.022	0.034	0.014	0.017	0.028	0.021	0.013	0.017	0.027	0.015	0.021	0.023	0.02	0.014	0.023	0.021	0.034	0.028	0.02	0.018	0.019	0.025	0.015	0.011	0.013	0.009	0.015	0.011	0.01				0.022	0.028	0.022	0.017	0.019	0.028	0.029	0.021	0.022
74	0.021	0.027	0.021	0.017	0.018	0.028	0.028	0.02	0.021	0.033	0.014	0.015	0.029	0.02	0.013	0.017	0.029	0.015	0.02	0.023	0.02	0.013	0.024	0.021	0.034	0.028	0.019	0.017	0.02	0.023	0.014	0.011	0.013	0.009	0.015	0.011	0.011				0.021	0.027	0.021	0.017	0.018	0.028	0.028	0.02	0.021
74.25	0.021	0.026	0.019	0.017	0.018	0.028	0.027	0.021	0.021	0.033	0.014	0.015	0.028	0.02	0.013	0.017	0.028	0.016	0.02	0.023	0.021	0.013	0.023	0.02	0.034	0.026	0.019	0.017	0.019	0.022	0.014	0.011	0.013	0.009	0.015	0.011	0.01				0.021	0.026	0.019	0.017	0.018	0.028	0.027	0.021	0.021
74.5	0.021	0.025	0.02	0.016	0.018	0.028	0.026	0.02	0.02	0.033	0.015	0.016	0.026	0.02	0.013	0.016	0.026	0.016	0.02	0.024	0.02	0.013	0.022	0.02	0.034	0.026	0.019	0.017	0.019	0.022	0.014	0.011	0.012	0.008	0.014	0.011	0.01				0.021	0.025	0.02	0.016	0.018	0.028	0.026	0.02	0.02
74.75	0.02	0.023	0.02	0.016	0.018	0.026	0.026	0.02	0.019	0.032	0.015	0.016	0.025	0.02	0.012	0.016	0.026	0.016	0.019	0.023	0.021	0.013	0.021	0.02	0.033	0.026	0.018	0.016	0.019	0.021	0.013	0.011	0.012	0.008	0.013	0.01	0.009				0.02	0.023	0.02	0.016	0.018	0.026	0.026	0.02	0.019
75	0.019	0.023	0.019	0.015	0.018	0.024	0.027	0.019	0.019	0.032	0.013	0.015	0.025	0.019	0.012	0.018	0.022	0.015	0.018	0.022	0.02	0.013	0.022	0.02	0.033	0.025	0.018	0.016	0.019	0.021	0.014	0.011	0.012	0.008	0.013	0.01	0.009				0.019	0.023	0.019	0.015	0.018	0.024	0.027	0.019	0.019
75.25	0.019	0.023	0.019	0.015	0.017	0.024	0.026	0.019	0.018	0.031	0.013	0.015	0.025	0.019	0.012	0.016	0.021	0.013	0.017	0.021	0.019	0.012	0.022	0.02	0.032	0.025	0.018	0.016	0.018	0.021	0.013	0.01	0.012	0.008	0.013	0.011	0.01				0.019	0.023	0.019	0.015	0.017	0.024	0.026	0.019	0.018
75.5	0.019	0.023	0.019	0.015	0.017	0.023	0.025	0.019	0.019	0.029	0.012	0.014	0.025	0.018	0.012	0.015	0.023	0.014	0.017	0.021	0.018	0.012	0.021	0.02	0.03	0.026	0.017	0.015	0.018	0.021	0.013	0.01	0.011	0.008	0.013	0.01	0.01				0.019	0.023	0.019	0.015	0.017	0.023	0.025	0.019	0.019
75.75	0.019	0.024	0.02	0.015	0.017	0.024	0.024	0.017	0.018	0.029	0.013	0.015	0.024	0.018	0.012	0.015	0.025	0.013	0.017	0.02	0.018	0.012	0.02	0.02	0.031	0.024	0.016	0.015	0.018	0.021	0.012	0.01	0.011	0.008	0.012	0.01	0.01				0.019	0.024	0.02	0.015	0.017	0.024	0.024	0.017	0.018
76	0.018	0.023	0.017	0.015	0.016	0.024	0.024	0.018	0.018	0.029	0.014	0.014	0.024	0.018	0.011	0.015	0.022	0.012	0.018	0.02	0.018	0.012	0.021	0.02	0.029	0.023	0.016	0.015	0.018	0.02	0.012	0.01	0.011	0.008	0.012	0.009	0.009				0.018	0.023	0.017	0.015	0.016	0.024	0.024	0.018	0.018
76.25	0.019	0.022	0.018	0.014	0.016	0.023	0.023	0.018	0.017	0.029	0.013	0.014	0.024	0.018	0.011	0.014	0.021	0.013	0.017	0.02	0.017	0.012	0.021	0.018	0.029	0.024	0.016	0.015	0.017	0.02	0.012	0.009	0.011	0.008	0.012	0.009	0.01				0.019	0.022	0.018	0.014	0.016	0.023	0.023	0.018	0.017
76.5	0.018	0.021	0.017	0.014	0.017	0.023	0.023	0.017	0.018	0.027	0.012	0.014	0.024	0.016	0.011	0.015	0.023	0.012	0.016	0.019	0.017	0.011	0.02	0.018	0.03	0.024	0.016	0.015	0.017	0.021	0.012	0.01	0.01	0.008	0.012	0.009	0.009				0.018	0.021	0.017	0.014	0.017	0.023	0.023	0.017	0.018
76.75	0.017	0.022	0.017	0.014	0.016	0.022	0.022	0.017	0.017	0.027	0.012	0.013	0.025	0.018	0.011	0.014	0.02	0.012	0.016	0.019	0.016	0.011	0.02	0.018	0.029	0.024	0.016	0.014	0.016	0.02	0.012	0.01	0.01	0.007	0.012	0.009	0.009				0.017	0.022	0.017	0.014	0.016	0.022	0.022	0.017	0.017
77	0.017	0.021	0.018	0.014	0.016	0.022	0.023	0.016	0.017	0.026	0.012	0.015	0.024	0.018	0.011	0.013	0.022	0.012	0.017	0.019	0.016	0.01	0.019	0.018	0.027	0.023	0.016	0.013	0.017	0.019	0.012	0.009	0.01	0.007	0.012	0.009	0.009				0.017	0.021	0.018	0.014	0.016	0.022	0.023	0.016	0.017
77.25	0.017	0.021	0.017	0.014	0.015	0.02	0.023	0.016	0.017	0.026	0.012	0.014	0.023	0.017	0.011	0.014	0.022	0.013	0.016	0.019	0.015	0.01	0.017	0.017	0.028	0.022	0.015	0.013	0.016	0.018	0.012	0.009	0.01	0.007	0.011	0.009	0.009				0.017	0.021	0.017	0.014	0.015	0.02	0.023	0.016	0.017
77.5	0.016	0.021	0.016	0.013	0.014	0.02	0.022	0.016	0.016	0.027	0.012	0.014	0.022	0.017	0.01	0.013	0.021	0.012	0.016	0.019	0.015	0.01	0.017	0.016	0.029	0.023	0.015	0.013	0.016	0.018	0.011	0.009	0.01	0.007	0.011	0.009	0.009				0.016	0.021	0.016	0.013	0.014	0.02	0.022	0.016	0.016
77.75	0.015	0.019	0.016	0.013	0.014	0.019	0.022	0.015	0.015	0.026	0.011	0.013	0.022	0.016	0.01	0.013	0.021	0.011	0.016	0.019	0.015	0.01	0.018	0.016	0.028	0.022	0.015	0.012	0.015	0.016	0.01	0.009	0.01	0.007	0.011	0.009	0.009				0.015	0.019	0.016	0.013	0.014	0.019	0.022	0.015	0.015
78	0.015	0.019	0.016	0.012	0.015	0.019	0.021	0.015	0.015	0.026	0.011	0.012	0.022	0.016	0.01	0.013	0.021	0.011	0.015	0.018	0.015	0.01	0.017	0.016	0.026	0.021	0.015	0.013	0.016	0.017	0.01	0.009	0.01	0.007	0.011	0.008	0.008				0.015	0.019	0.016	0.012	0.015	0.019	0.021	0.015	0.015
78.25	0.015	0.019	0.017	0.012	0.014	0.019	0.02	0.015	0.015	0.025	0.011	0.012	0.023	0.016	0.01	0.012	0.019	0.011	0.014	0.017	0.015	0.01	0.017	0.016	0.025	0.02	0.014	0.012	0.015	0.018	0.01	0.008	0.009	0.007	0.01	0.008	0.008				0.015	0.019	0.017	0.012	0.014	0.019	0.02	0.015	0.015
78.5	0.015	0.018	0.017	0.012	0.013	0.018	0.02	0.014	0.015	0.025	0.01	0.012	0.023	0.015	0.009	0.012	0.021	0.011	0.014	0.017	0.015	0.009	0.016	0.016	0.025	0.02	0.013	0.012	0.014	0.017	0.01	0.008	0.009	0.006	0.01	0.008	0.007				0.015	0.018	0.017	0.012	0.013	0.018	0.02	0.014	0.015
78.75	0.015	0.018	0.016	0.011	0.013	0.018	0.02	0.015	0.014	0.024	0.01	0.012	0.022	0.015	0.01	0.013	0.019	0.011	0.014	0.017	0.014	0.009	0.016	0.016	0.024	0.019	0.013	0.012	0.013	0.017	0.01	0.008	0.009	0.006	0.01	0.008	0.007				0.015	0.018	0.016	0.011	0.013	0.018	0.02	0.015	0.014
79	0.014	0.019	0.015	0.011	0.013	0.018	0.019	0.014	0.013	0.023	0.01	0.011	0.021	0.013	0.009	0.012	0.02	0.01	0.014	0.017	0.014	0.009	0.015	0.015	0.024	0.019	0.013	0.011	0.014	0.015	0.01	0.008	0.009	0.006	0.01	0.008	0.007				0.014	0.019	0.015	0.011	0.013	0.018	0.019	0.014	0.013
79.25	0.013	0.017	0.014	0.011	0.013	0.018	0.018	0.013	0.013	0.023	0.01	0.012	0.02	0.012	0.009	0.011	0.018	0.01	0.014	0.015	0.014	0.008	0.014	0.015	0.023	0.019	0.013	0.011	0.013	0.016	0.009	0.008	0.009	0.006	0.01	0.008	0.007				0.013	0.017	0.014	0.011	0.013	0.018	0.018	0.013	0.013
79.5	0.013	0.017	0.014	0.011	0.012	0.016	0.018	0.014	0.013	0.022	0.01	0.012	0.021	0.013	0.008	0.011	0.017	0.01	0.013	0.015	0.014	0.008	0.015	0.014	0.023	0.018	0.012	0.011	0.013	0.015	0.009	0.008	0.008	0.006	0.009	0.007	0.007				0.013	0.017	0.014	0.011	0.012	0.016	0.018	0.014	0.013
79.75	0.013	0.016	0.015	0.011	0.012	0.017	0.018	0.013	0.013	0.022	0.01	0.012	0.02	0.014	0.008	0.011	0.018	0.01	0.013	0.015	0.016	0.008	0.015	0.013	0.023	0.017	0.012	0.01	0.012	0.016	0.009	0.007	0.008	0.006	0.009	0.007	0.007				0.013	0.016	0.015	0.011	0.012	0.017	0.018	0.013	0.013
80	0.018	0.022	0.025	0.013	0.016	0.024	0.023	0.016	0.017	0.027	0.012	0.017	0.025	0.017	0.011	0.014	0.025	0.013	0.017	0.02	0.016	0.01	0.021	0.02	0.029	0.022	0.014	0.013	0.016	0.024	0.011	0.01	0.01	0.007	0.011	0.008	0.009				0.018	0.022	0.025	0.013	0.016	0.024	0.023	0.016	0.017
[truncated: 28 more columns]

## Sheet: TDW_REC2
Each value represents the relative amount of power in a given frequency bin (column A); the data is depicted against a weighted reference as described in material and methods. Each columns represents data of one mouse
	WT																				KO
Freq[Hz]	_1WT_NO_CIRP03	_1WT_NO_CIRP04	_1WT_NO_CIRP05	_1WT_NO_CIRP09	_1WT_NO_CIRP11	_1WT_NO_CIRP18	_1WT_NO_CIRP19	_1WT_NO_CIRP29	_1WT_NO_CIRP30	_1WT_NO_CIRP31	_1WT_NO_CIRP48	_1WT_YS_TC03	_1WT_YS_TC06	_1WT_YS_TC08	_1WT_YS_TC09	_1WT_YS_TC12	_1WT_YS_TC13	_1WT_YS_TC18	_1WT_YS_TC21	_1WT_YS_TC22	_2KO_NO_CIRP01	_2KO_NO_CIRP10	_2KO_NO_CIRP13	_2KO_NO_CIRP14	_2KO_NO_CIRP15	_2KO_NO_CIRP20	_2KO_NO_CIRP25	_2KO_NO_CIRP40	_2KO_NO_CIRP50	_2KO_YS_TC01	_2KO_YS_TC07	_2KO_YS_TC10	_2KO_YS_TC15	_2KO_YS_TC16	_2KO_YS_TC17	_2KO_YS_TC19	_2KO_YS_TC20
0.75	0.708	0.851	1.033	0.93	0.795	1.089	1.062	0.63	0.604	0.95	0.584	0.941	0.78	0.615	0.782	0.77	0.529	0.586	0.685	0.847	1.327	0.867	0.855	1.244	0.796	1.027	0.821	0.813	0.578	0.804	0.653	0.992	0.591	0.658	2.292	0.859	0.84
1	0.893	1.084	1.099	1.128	0.874	1.165	1.304	0.843	0.769	0.885	0.671	0.912	0.861	0.919	0.888	0.812	0.671	0.865	0.905	1.071	1.466	1.128	1.071	1.646	0.929	1.086	0.848	1.086	0.764	1.011	0.853	1.029	0.784	0.654	1.946	1.118	1.188
1.25	0.991	1.245	1.189	1.202	0.987	1.24	1.465	0.995	0.936	0.959	0.778	1.025	0.997	1.077	0.997	0.881	0.761	1.072	1.048	1.154	1.44	1.336	1.276	1.881	1.137	1.204	0.974	1.307	0.946	1.221	1.003	1.078	1.021	0.691	1.741	1.313	1.522
1.5	1.029	1.239	1.191	1.136	1.093	1.37	1.453	1.088	1.034	1.051	0.813	1.119	0.977	1.136	1.032	0.906	0.893	1.068	1.04	1.174	1.292	1.423	1.333	2.013	1.353	1.189	0.996	1.474	1.021	1.183	1.068	1.033	1.102	0.71	1.447	1.413	1.622
1.75	0.984	1.093	1.157	1.13	1.109	1.481	1.423	1.197	1.016	1.076	0.785	1.062	0.93	1.019	1.073	0.915	0.818	1.061	1.014	1.081	1.263	1.526	1.325	1.896	1.353	1.15	0.973	1.529	1.022	1.15	1.105	0.953	1.162	0.703	1.205	1.464	1.449
2	0.936	1.097	1.183	1.097	1.058	1.436	1.368	1.201	0.983	0.985	0.759	0.971	0.883	0.985	1.007	0.83	0.763	1.006	1.011	1.016	1.196	1.398	1.315	1.663	1.23	1.057	0.926	1.489	0.909	1.137	1.042	0.894	1.081	0.666	1.077	1.352	1.452
2.25	0.898	1.096	1.147	1.097	0.965	1.401	1.272	1.115	0.939	0.889	0.744	0.898	0.826	0.968	0.934	0.716	0.727	0.903	0.94	0.864	1.07	1.271	1.321	1.395	1.158	0.961	0.843	1.489	0.867	1.089	0.967	0.85	1.01	0.663	0.961	1.269	1.249
2.5	0.864	1.062	1.066	1.061	0.918	1.307	1.117	1.086	0.912	0.83	0.69	0.877	0.741	0.878	0.861	0.654	0.762	0.884	0.828	0.798	1.085	1.211	1.21	1.291	1.012	0.916	0.776	1.412	0.821	0.993	0.887	0.815	0.92	0.618	0.837	1.121	1.108
2.75	0.82	1.012	0.95	1.026	0.856	1.211	1.066	1.018	0.857	0.798	0.636	0.882	0.732	0.816	0.829	0.581	0.705	0.893	0.746	0.732	1.08	1.109	1.056	1.234	0.838	0.852	0.708	1.3	0.775	0.901	0.815	0.744	0.866	0.584	0.758	0.974	0.974
3	0.774	0.997	0.879	1.026	0.787	1.1	1.006	0.999	0.836	0.725	0.636	0.821	0.689	0.719	0.797	0.558	0.705	0.861	0.672	0.659	1.007	0.984	0.983	1.122	0.908	0.797	0.655	1.203	0.674	0.843	0.738	0.707	0.763	0.547	0.653	0.803	0.828
3.25	0.708	0.935	0.798	0.96	0.713	0.984	0.906	0.928	0.8	0.654	0.593	0.754	0.645	0.711	0.748	0.497	0.668	0.787	0.601	0.582	0.941	0.87	0.917	0.992	0.817	0.739	0.617	1.089	0.643	0.787	0.671	0.63	0.702	0.499	0.613	0.736	0.746
3.5	0.667	0.907	0.725	0.897	0.673	0.886	0.8	0.8	0.737	0.599	0.571	0.664	0.637	0.653	0.71	0.456	0.564	0.724	0.569	0.528	0.822	0.78	0.783	0.856	0.651	0.678	0.567	0.942	0.589	0.688	0.625	0.571	0.656	0.458	0.557	0.673	0.592
3.75	0.656	0.903	0.688	0.874	0.651	0.843	0.789	0.78	0.696	0.627	0.533	0.606	0.611	0.633	0.677	0.433	0.498	0.656	0.555	0.512	0.839	0.695	0.741	0.81	0.583	0.645	0.531	0.855	0.582	0.67	0.581	0.531	0.609	0.422	0.539	0.639	0.513
4	0.644	0.855	0.691	0.856	0.617	0.812	0.784	0.767	0.663	0.593	0.501	0.581	0.591	0.565	0.654	0.416	0.484	0.657	0.545	0.492	0.817	0.644	0.711	0.771	0.555	0.619	0.506	0.816	0.569	0.666	0.56	0.495	0.565	0.413	0.512	0.583	0.512
4.25	0.605	0.803	0.665	0.836	0.626	0.805	0.774	0.716	0.68	0.574	0.532	0.538	0.58	0.577	0.646	0.43	0.473	0.654	0.541	0.499	0.777	0.637	0.694	0.731	0.554	0.592	0.49	0.794	0.574	0.627	0.564	0.473	0.545	0.405	0.484	0.563	0.534
4.5	0.618	0.798	0.625	0.854	0.61	0.794	0.744	0.73	0.662	0.557	0.538	0.476	0.592	0.604	0.618	0.415	0.448	0.616	0.511	0.481	0.723	0.573	0.644	0.702	0.518	0.577	0.485	0.773	0.581	0.642	0.536	0.456	0.543	0.384	0.496	0.533	0.503
4.75	0.619	0.831	0.62	0.851	0.614	0.8	0.71	0.721	0.646	0.555	0.496	0.464	0.584	0.591	0.627	0.432	0.433	0.628	0.511	0.465	0.703	0.56	0.645	0.709	0.529	0.586	0.493	0.743	0.58	0.648	0.535	0.44	0.524	0.383	0.518	0.547	0.458
5	0.605	0.844	0.575	0.829	0.615	0.827	0.726	0.701	0.614	0.572	0.488	0.499	0.593	0.578	0.66	0.448	0.456	0.631	0.513	0.452	0.722	0.587	0.605	0.692	0.491	0.565	0.52	0.721	0.59	0.642	0.557	0.443	0.52	0.374	0.506	0.548	0.449
5.25	0.621	0.835	0.562	0.769	0.623	0.803	0.726	0.679	0.627	0.581	0.479	0.477	0.6	0.532	0.659	0.453	0.469	0.613	0.53	0.471	0.739	0.554	0.604	0.686	0.505	0.601	0.508	0.718	0.608	0.622	0.558	0.453	0.515	0.391	0.497	0.591	0.465
5.5	0.628	0.864	0.592	0.801	0.643	0.806	0.711	0.687	0.68	0.587	0.45	0.474	0.611	0.559	0.644	0.456	0.492	0.653	0.569	0.481	0.741	0.564	0.622	0.694	0.535	0.591	0.528	0.724	0.66	0.641	0.544	0.444	0.504	0.396	0.537	0.561	0.479
5.75	0.639	0.918	0.647	0.832	0.639	0.848	0.723	0.723	0.723	0.62	0.468	0.468	0.633	0.552	0.683	0.476	0.475	0.694	0.566	0.496	0.765	0.574	0.616	0.699	0.537	0.621	0.508	0.705	0.642	0.63	0.561	0.438	0.53	0.393	0.563	0.549	0.471
6	0.668	0.963	0.605	0.855	0.691	0.858	0.742	0.721	0.74	0.67	0.508	0.49	0.644	0.591	0.7	0.493	0.499	0.713	0.572	0.514	0.818	0.566	0.621	0.703	0.526	0.67	0.525	0.736	0.67	0.651	0.595	0.438	0.556	0.403	0.57	0.568	0.461
6.25	0.729	1.055	0.659	0.905	0.715	0.938	0.838	0.76	0.783	0.678	0.517	0.504	0.689	0.676	0.751	0.541	0.543	0.741	0.587	0.547	0.831	0.618	0.641	0.735	0.55	0.722	0.555	0.794	0.712	0.669	0.598	0.457	0.591	0.415	0.577	0.569	0.468
6.5	0.825	1.289	0.784	1.016	0.865	1.12	0.922	0.877	0.887	0.726	0.597	0.553	0.746	0.724	0.836	0.645	0.648	0.81	0.611	0.604	0.924	0.684	0.706	0.759	0.592	0.831	0.611	0.872	0.781	0.703	0.655	0.499	0.666	0.463	0.674	0.636	0.471
6.75	1.034	1.716	1.077	1.225	1.108	1.504	1.102	1.1	1.235	0.874	0.754	0.663	0.894	0.948	1.045	0.826	0.77	1.09	0.745	0.716	1.23	0.826	0.852	0.862	0.728	1.043	0.706	1.015	0.938	0.826	0.78	0.554	0.824	0.523	0.929	0.764	0.563
7	1.18	2.078	1.257	1.373	1.246	1.688	1.319	1.221	1.367	0.987	0.844	0.653	1.049	1.092	1.194	0.913	0.843	1.268	0.885	0.838	1.532	0.947	0.962	0.983	0.826	1.261	0.78	1.127	1.042	0.913	0.92	0.625	0.954	0.571	1.087	0.896	0.65
7.25	1.356	2.554	1.459	1.571	1.375	1.868	1.5	1.286	1.543	1.113	0.895	0.723	1.121	1.203	1.301	0.928	1.014	1.345	1.025	0.975	1.736	1.069	1.102	1.057	0.928	1.501	0.869	1.193	1.14	0.985	1.035	0.669	1.127	0.615	1.222	0.986	0.7
7.5	1.621	2.98	1.661	1.802	1.467	2.054	1.766	1.453	1.766	1.227	0.967	0.847	1.193	1.282	1.51	0.928	1.239	1.425	1.133	1.072	1.897	1.213	1.257	1.157	0.982	1.722	0.962	1.369	1.211	1.062	1.173	0.749	1.244	0.676	1.288	1.094	0.707
7.75	1.865	3.233	1.822	2.059	1.662	2.337	2.063	1.639	2.003	1.338	1.05	1.042	1.336	1.464	1.644	1.001	1.499	1.478	1.265	1.188	2.038	1.375	1.445	1.355	1.061	1.907	1.108	1.546	1.302	1.26	1.284	0.854	1.424	0.719	1.282	1.195	0.762
8	2.144	3.313	1.766	2.237	1.795	2.517	2.322	1.741	2.092	1.463	1.133	1.396	1.478	1.711	1.867	1.074	1.569	1.706	1.385	1.323	2.212	1.563	1.675	1.588	1.255	2.047	1.277	1.815	1.492	1.378	1.433	1.006	1.513	0.773	1.405	1.29	0.892
8.25	2.348	3.219	1.711	2.311	1.802	2.642	2.459	1.875	2.197	1.704	1.246	1.255	1.451	1.583	2.024	1.137	1.518	1.936	1.627	1.449	2.067	1.706	1.849	1.732	1.474	2.191	1.452	2.008	1.617	1.462	1.576	1.094	1.59	0.883	1.502	1.433	0.931
8.5	2.426	3.044	1.52	2.505	1.91	2.657	2.511	2.061	2.242	1.867	1.342	1.314	1.648	1.578	2.122	1.235	1.557	1.977	1.797	1.64	1.857	1.769	2.104	2.081	1.64	2.272	1.596	2.094	1.762	1.534	1.662	1.253	1.626	0.973	1.544	1.489	0.997
8.75	2.406	2.592	1.264	2.583	1.99	2.611	2.453	2.128	2.247	2.082	1.348	1.339	1.861	1.722	2.299	1.111	1.399	1.849	1.729	1.694	1.55	1.897	2.2	2.371	1.709	2.125	1.721	2.266	2.017	1.717	1.732	1.441	1.502	1.019	1.428	1.459	1.121
9	2.149	1.979	0.991	2.516	1.892	2.244	2.278	2.029	2.045	2.211	1.232	1.291	1.927	1.535	2.451	1.096	1.313	1.716	1.698	1.608	1.327	1.739	2.35	2.598	1.618	1.896	1.765	2.25	2.062	1.7	1.655	1.605	1.501	1.039	1.331	1.528	1.18
9.25	1.738	1.523	0.811	2.295	1.743	1.912	1.851	1.827	1.81	2.171	1.191	1.248	1.883	1.173	2.403	1.063	1.082	1.493	1.528	1.525	1.07	1.472	2.191	2.778	1.492	1.677	1.758	1.947	2.121	1.585	1.615	1.6	1.32	1.101	1.098	1.444	1.103
9.5	1.344	1.167	0.661	1.901	1.594	1.643	1.509	1.505	1.576	2.012	1.068	1.177	1.831	1.087	2.287	0.917	0.961	1.387	1.285	1.356	0.854	1.288	1.813	2.781	1.319	1.425	1.624	1.661	2.022	1.434	1.473	1.551	1.124	1.082	0.985	1.325	1.119
9.75	1.111	0.936	0.58	1.412	1.418	1.303	1.206	1.265	1.264	1.807	0.908	1.063	1.597	0.871	1.979	0.796	0.748	1.134	1.104	1.089	0.704	1.082	1.523	2.634	1.058	1.148	1.406	1.404	1.942	1.203	1.3	1.419	0.865	1.051	0.793	1.138	1.022
10	0.863	0.765	0.469	1.161	1.239	1.061	0.976	1.072	1.042	1.517	0.721	0.864	1.372	0.723	1.661	0.671	0.588	0.935	0.899	0.909	0.607	0.861	1.227	2.525	0.811	0.891	1.217	1.136	1.781	1.003	1.07	1.247	0.708	0.977	0.609	1.045	0.939
10.25	0.707	0.662	0.424	0.999	1.012	0.856	0.787	0.888	0.864	1.271	0.532	0.663	1.184	0.634	1.347	0.599	0.458	0.803	0.73	0.781	0.522	0.72	0.958	2.246	0.698	0.742	1.055	0.939	1.519	0.845	0.874	0.986	0.587	0.901	0.504	0.871	0.812
10.5	0.611	0.556	0.337	0.748	0.842	0.714	0.672	0.709	0.712	1.07	0.468	0.524	0.999	0.517	1.095	0.503	0.344	0.685	0.607	0.632	0.431	0.62	0.773	1.823	0.568	0.623	0.87	0.747	1.279	0.734	0.743	0.804	0.495	0.776	0.463	0.74	0.627
10.75	0.504	0.515	0.32	0.62	0.701	0.597	0.549	0.634	0.576	0.9	0.386	0.461	0.843	0.436	0.846	0.408	0.294	0.547	0.511	0.494	0.375	0.466	0.637	1.53	0.501	0.542	0.724	0.637	1.058	0.575	0.616	0.645	0.423	0.664	0.391	0.608	0.505
11	0.43	0.438	0.256	0.545	0.596	0.534	0.454	0.542	0.476	0.748	0.317	0.401	0.7	0.388	0.737	0.358	0.268	0.492	0.429	0.419	0.323	0.417	0.552	1.249	0.407	0.485	0.599	0.535	0.868	0.493	0.514	0.516	0.359	0.553	0.329	0.515	0.443
11.25	0.376	0.394	0.227	0.471	0.515	0.457	0.386	0.458	0.41	0.621	0.283	0.365	0.597	0.344	0.626	0.297	0.273	0.42	0.36	0.367	0.298	0.342	0.469	0.928	0.363	0.406	0.513	0.453	0.726	0.42	0.439	0.41	0.295	0.469	0.315	0.465	0.353
11.5	0.343	0.355	0.221	0.411	0.442	0.401	0.331	0.397	0.374	0.523	0.254	0.318	0.524	0.296	0.533	0.254	0.224	0.356	0.294	0.306	0.274	0.305	0.412	0.738	0.318	0.37	0.427	0.398	0.595	0.369	0.387	0.333	0.266	0.403	0.286	0.403	0.271
11.75	0.298	0.313	0.217	0.369	0.382	0.363	0.302	0.351	0.335	0.437	0.224	0.285	0.439	0.265	0.445	0.237	0.203	0.309	0.257	0.28	0.235	0.27	0.359	0.595	0.292	0.345	0.364	0.351	0.53	0.323	0.333	0.284	0.245	0.334	0.259	0.337	0.246
12	0.267	0.291	0.209	0.326	0.325	0.33	0.272	0.334	0.304	0.372	0.211	0.226	0.39	0.258	0.386	0.208	0.195	0.278	0.224	0.262	0.216	0.256	0.309	0.493	0.265	0.302	0.311	0.3	0.462	0.285	0.295	0.263	0.216	0.277	0.24	0.313	0.229
12.25	0.243	0.27	0.187	0.31	0.288	0.318	0.239	0.3	0.261	0.335	0.194	0.217	0.362	0.224	0.343	0.189	0.175	0.257	0.21	0.239	0.199	0.229	0.284	0.43	0.224	0.269	0.27	0.272	0.414	0.249	0.259	0.232	0.198	0.254	0.212	0.254	0.203
12.5	0.233	0.242	0.156	0.28	0.27	0.299	0.219	0.272	0.233	0.298	0.182	0.21	0.318	0.203	0.307	0.178	0.168	0.246	0.195	0.216	0.184	0.205	0.26	0.378	0.212	0.256	0.244	0.263	0.356	0.223	0.242	0.204	0.184	0.222	0.203	0.235	0.177
12.75	0.212	0.225	0.153	0.247	0.25	0.271	0.205	0.241	0.215	0.264	0.17	0.193	0.297	0.202	0.277	0.161	0.155	0.23	0.181	0.19	0.175	0.185	0.252	0.318	0.211	0.238	0.218	0.237	0.326	0.214	0.217	0.185	0.173	0.202	0.192	0.231	0.178
13	0.191	0.223	0.164	0.24	0.233	0.25	0.189	0.221	0.208	0.25	0.161	0.188	0.276	0.197	0.258	0.157	0.148	0.212	0.16	0.182	0.164	0.172	0.237	0.306	0.189	0.227	0.196	0.229	0.315	0.192	0.204	0.176	0.165	0.19	0.179	0.215	0.167
13.25	0.181	0.207	0.154	0.228	0.225	0.242	0.186	0.214	0.196	0.228	0.151	0.168	0.259	0.181	0.247	0.143	0.152	0.2	0.151	0.171	0.158	0.165	0.211	0.274	0.182	0.217	0.187	0.216	0.284	0.179	0.202	0.164	0.159	0.177	0.159	0.204	0.15
13.5	0.176	0.192	0.142	0.205	0.204	0.228	0.171	0.201	0.192	0.205	0.154	0.154	0.24	0.184	0.237	0.143	0.142	0.196	0.149	0.163	0.149	0.157	0.203	0.254	0.165	0.208	0.18	0.202	0.272	0.175	0.187	0.153	0.151	0.165	0.161	0.198	0.146
13.75	0.167	0.189	0.127	0.199	0.201	0.225	0.161	0.189	0.179	0.19	0.155	0.145	0.226	0.176	0.226	0.139	0.134	0.194	0.137	0.155	0.14	0.153	0.19	0.24	0.165	0.201	0.167	0.19	0.262	0.171	0.177	0.151	0.143	0.151	0.164	0.189	0.141
14	0.157	0.18	0.135	0.197	0.198	0.2	0.154	0.182	0.166	0.178	0.144	0.143	0.218	0.164	0.207	0.132	0.13	0.18	0.129	0.156	0.14	0.149	0.176	0.223	0.149	0.188	0.162	0.181	0.239	0.162	0.168	0.138	0.144	0.141	0.163	0.173	0.133
14.25	0.158	0.175	0.14	0.18	0.191	0.197	0.15	0.174	0.161	0.176	0.128	0.147	0.219	0.162	0.193	0.127	0.127	0.171	0.127	0.149	0.131	0.144	0.167	0.206	0.14	0.181	0.157	0.169	0.221	0.149	0.166	0.128	0.14	0.133	0.146	0.169	0.116
14.5	0.156	0.172	0.128	0.166	0.183	0.19	0.142	0.167	0.157	0.166	0.125	0.141	0.203	0.158	0.187	0.127	0.135	0.166	0.124	0.142	0.128	0.138	0.161	0.197	0.147	0.171	0.151	0.165	0.211	0.136	0.162	0.124	0.128	0.13	0.133	0.167	0.122
14.75	0.151	0.17	0.124	0.165	0.182	0.185	0.138	0.158	0.151	0.152	0.128	0.133	0.2	0.16	0.18	0.126	0.125	0.16	0.117	0.14	0.129	0.129	0.156	0.187	0.134	0.171	0.146	0.157	0.209	0.135	0.164	0.121	0.121	0.124	0.135	0.156	0.122
15	0.14	0.168	0.127	0.158	0.173	0.182	0.14	0.149	0.156	0.14	0.124	0.139	0.189	0.148	0.182	0.124	0.113	0.154	0.113	0.13	0.126	0.126	0.146	0.181	0.134	0.16	0.142	0.158	0.205	0.131	0.165	0.117	0.118	0.119	0.128	0.151	0.111
15.25	0.135	0.163	0.118	0.159	0.164	0.17	0.133	0.143	0.15	0.14	0.115	0.137	0.178	0.128	0.178	0.114	0.113	0.15	0.113	0.13	0.121	0.126	0.142	0.175	0.133	0.152	0.133	0.152	0.185	0.127	0.164	0.112	0.118	0.113	0.13	0.146	0.115
15.5	0.135	0.171	0.132	0.155	0.158	0.162	0.134	0.148	0.144	0.138	0.114	0.13	0.178	0.138	0.172	0.104	0.103	0.156	0.112	0.129	0.124	0.123	0.143	0.169	0.141	0.151	0.131	0.147	0.186	0.124	0.161	0.107	0.119	0.109	0.127	0.142	0.109
15.75	0.133	0.163	0.13	0.154	0.148	0.165	0.128	0.14	0.141	0.135	0.118	0.116	0.175	0.14	0.168	0.104	0.113	0.15	0.11	0.123	0.125	0.125	0.139	0.167	0.142	0.152	0.129	0.146	0.188	0.124	0.155	0.108	0.122	0.109	0.127	0.138	0.108
16	0.129	0.153	0.116	0.154	0.143	0.163	0.13	0.144	0.147	0.13	0.112	0.125	0.173	0.137	0.163	0.105	0.108	0.148	0.111	0.119	0.12	0.121	0.139	0.157	0.141	0.148	0.131	0.145	0.182	0.125	0.157	0.11	0.121	0.108	0.119	0.13	0.106
16.25	0.128	0.16	0.106	0.152	0.138	0.164	0.127	0.146	0.139	0.126	0.112	0.116	0.171	0.128	0.152	0.109	0.114	0.146	0.11	0.114	0.114	0.119	0.138	0.151	0.139	0.14	0.124	0.143	0.177	0.12	0.151	0.108	0.114	0.105	0.112	0.131	0.097
16.5	0.128	0.167	0.104	0.148	0.134	0.162	0.124	0.131	0.136	0.121	0.114	0.109	0.17	0.13	0.155	0.105	0.109	0.14	0.107	0.114	0.114	0.122	0.136	0.148	0.137	0.139	0.12	0.143	0.178	0.117	0.147	0.106	0.115	0.102	0.115	0.128	0.099
16.75	0.129	0.156	0.109	0.139	0.137	0.157	0.124	0.132	0.137	0.12	0.116	0.119	0.165	0.121	0.15	0.096	0.113	0.137	0.105	0.111	0.117	0.116	0.135	0.147	0.139	0.137	0.119	0.136	0.162	0.117	0.145	0.101	0.116	0.103	0.113	0.125	0.102
17	0.122	0.15	0.109	0.143	0.133	0.155	0.123	0.129	0.135	0.118	0.113	0.107	0.167	0.136	0.153	0.095	0.115	0.139	0.106	0.108	0.117	0.113	0.127	0.143	0.131	0.137	0.12	0.137	0.163	0.114	0.145	0.1	0.113	0.103	0.11	0.122	0.093
17.25	0.122	0.144	0.107	0.136	0.129	0.152	0.124	0.122	0.135	0.116	0.111	0.102	0.166	0.127	0.153	0.098	0.106	0.138	0.105	0.108	0.112	0.116	0.132	0.14	0.129	0.136	0.118	0.142	0.169	0.119	0.144	0.102	0.112	0.098	0.11	0.121	0.095
17.5	0.119	0.136	0.105	0.14	0.125	0.15	0.121	0.121	0.136	0.117	0.101	0.105	0.158	0.117	0.149	0.094	0.102	0.135	0.102	0.104	0.112	0.114	0.134	0.136	0.13	0.132	0.115	0.139	0.164	0.113	0.136	0.103	0.112	0.099	0.108	0.118	0.103
17.75	0.116	0.133	0.096	0.136	0.123	0.146	0.116	0.119	0.132	0.113	0.1	0.114	0.153	0.127	0.15	0.091	0.108	0.131	0.1	0.108	0.107	0.114	0.133	0.137	0.131	0.127	0.113	0.134	0.164	0.106	0.136	0.102	0.107	0.099	0.11	0.115	0.099
18	0.115	0.133	0.088	0.139	0.121	0.144	0.114	0.119	0.128	0.112	0.106	0.11	0.154	0.122	0.14	0.097	0.108	0.125	0.097	0.103	0.102	0.11	0.134	0.13	0.121	0.125	0.113	0.131	0.15	0.104	0.129	0.102	0.11	0.095	0.102	0.113	0.09
18.25	0.115	0.135	0.09	0.133	0.112	0.144	0.112	0.115	0.127	0.112	0.113	0.097	0.151	0.12	0.139	0.093	0.107	0.123	0.099	0.107	0.098	0.113	0.134	0.132	0.122	0.118	0.114	0.127	0.149	0.103	0.123	0.101	0.109	0.091	0.103	0.11	0.093
18.5	0.113	0.127	0.091	0.135	0.111	0.138	0.111	0.108	0.126	0.111	0.105	0.097	0.149	0.12	0.146	0.089	0.104	0.122	0.1	0.105	0.097	0.109	0.124	0.13	0.12	0.118	0.111	0.127	0.154	0.1	0.124	0.097	0.108	0.086	0.103	0.113	0.09
18.75	0.112	0.121	0.091	0.126	0.11	0.136	0.108	0.108	0.122	0.113	0.098	0.094	0.154	0.111	0.14	0.085	0.099	0.124	0.094	0.102	0.1	0.106	0.125	0.125	0.117	0.125	0.112	0.124	0.149	0.097	0.121	0.092	0.099	0.084	0.099	0.104	0.086
19	0.109	0.118	0.087	0.126	0.107	0.133	0.099	0.107	0.122	0.108	0.106	0.094	0.155	0.109	0.143	0.088	0.099	0.121	0.092	0.096	0.095	0.104	0.121	0.127	0.109	0.118	0.113	0.122	0.151	0.097	0.117	0.094	0.097	0.086	0.096	0.1	0.083
19.25	0.107	0.117	0.082	0.129	0.103	0.125	0.096	0.107	0.119	0.109	0.1	0.09	0.141	0.124	0.139	0.091	0.097	0.11	0.087	0.093	0.091	0.104	0.113	0.123	0.109	0.108	0.107	0.118	0.144	0.095	0.115	0.093	0.1	0.08	0.094	0.102	0.083
19.5	0.105	0.106	0.087	0.12	0.101	0.124	0.097	0.106	0.115	0.103	0.094	0.09	0.139	0.107	0.137	0.088	0.093	0.108	0.089	0.096	0.088	0.101	0.108	0.116	0.111	0.107	0.106	0.116	0.142	0.099	0.109	0.093	0.098	0.077	0.096	0.104	0.082
19.75	0.104	0.104	0.081	0.118	0.101	0.121	0.097	0.103	0.116	0.106	0.093	0.082	0.139	0.102	0.138	0.086	0.082	0.11	0.087	0.094	0.088	0.099	0.108	0.116	0.104	0.11	0.105	0.114	0.138	0.1	0.107	0.088	0.096	0.075	0.093	0.099	0.078
20	0.102	0.103	0.081	0.12	0.101	0.118	0.099	0.101	0.111	0.106	0.091	0.08	0.139	0.108	0.137	0.083	0.081	0.104	0.084	0.09	0.089	0.097	0.103	0.117	0.107	0.112	0.1	0.116	0.14	0.096	0.107	0.084	0.096	0.077	0.096	0.092	0.077
20.25	0.101	0.102	0.079	0.115	0.098	0.119	0.092	0.098	0.109	0.105	0.091	0.08	0.137	0.102	0.131	0.081	0.089	0.101	0.083	0.091	0.089	0.098	0.102	0.111	0.108	0.107	0.097	0.11	0.137	0.094	0.105	0.084	0.092	0.076	0.088	0.095	0.077
20.5	0.097	0.1	0.076	0.115	0.096	0.115	0.087	0.097	0.105	0.103	0.084	0.077	0.133	0.101	0.122	0.083	0.085	0.1	0.08	0.091	0.084	0.091	0.102	0.11	0.103	0.103	0.096	0.103	0.132	0.087	0.103	0.085	0.093	0.073	0.086	0.094	0.075
20.75	0.092	0.101	0.08	0.107	0.095	0.116	0.084	0.098	0.103	0.096	0.09	0.076	0.132	0.102	0.118	0.082	0.081	0.102	0.079	0.085	0.085	0.085	0.098	0.107	0.097	0.104	0.092	0.101	0.125	0.082	0.099	0.081	0.088	0.072	0.087	0.09	0.069
21	0.094	0.096	0.079	0.104	0.091	0.109	0.085	0.097	0.105	0.095	0.088	0.079	0.126	0.105	0.119	0.08	0.086	0.097	0.08	0.084	0.081	0.084	0.091	0.106	0.094	0.102	0.093	0.102	0.123	0.082	0.096	0.082	0.084	0.072	0.089	0.088	0.076
21.25	0.094	0.095	0.074	0.104	0.091	0.101	0.084	0.096	0.103	0.097	0.078	0.079	0.126	0.092	0.119	0.083	0.079	0.088	0.076	0.088	0.079	0.086	0.09	0.102	0.092	0.099	0.092	0.104	0.123	0.085	0.099	0.079	0.087	0.068	0.087	0.094	0.071
21.5	0.095	0.097	0.077	0.105	0.091	0.102	0.086	0.09	0.098	0.096	0.083	0.078	0.122	0.089	0.115	0.08	0.081	0.091	0.077	0.085	0.079	0.083	0.092	0.1	0.091	0.097	0.087	0.098	0.122	0.083	0.096	0.076	0.088	0.068	0.082	0.09	0.07
21.75	0.092	0.096	0.079	0.104	0.09	0.1	0.085	0.092	0.096	0.094	0.083	0.074	0.124	0.089	0.111	0.077	0.081	0.091	0.075	0.086	0.075	0.083	0.089	0.098	0.091	0.091	0.086	0.095	0.117	0.082	0.094	0.075	0.083	0.067	0.083	0.085	0.061
22	0.092	0.091	0.077	0.099	0.086	0.1	0.083	0.091	0.094	0.09	0.083	0.073	0.115	0.087	0.112	0.079	0.079	0.091	0.076	0.084	0.073	0.08	0.086	0.097	0.092	0.093	0.088	0.096	0.115	0.085	0.094	0.072	0.082	0.067	0.083	0.084	0.066
22.25	0.088	0.087	0.08	0.102	0.083	0.103	0.083	0.091	0.095	0.09	0.081	0.076	0.12	0.096	0.108	0.077	0.077	0.086	0.076	0.081	0.075	0.079	0.085	0.093	0.093	0.096	0.088	0.09	0.111	0.081	0.094	0.071	0.08	0.064	0.078	0.085	0.067
22.5	0.086	0.088	0.079	0.097	0.082	0.098	0.082	0.091	0.095	0.089	0.08	0.075	0.116	0.091	0.106	0.073	0.074	0.081	0.075	0.08	0.072	0.078	0.084	0.089	0.091	0.092	0.086	0.088	0.111	0.075	0.091	0.07	0.078	0.064	0.082	0.076	0.061
22.75	0.087	0.087	0.079	0.092	0.081	0.093	0.08	0.085	0.093	0.087	0.075	0.072	0.114	0.088	0.104	0.075	0.077	0.085	0.073	0.078	0.075	0.078	0.08	0.092	0.087	0.089	0.083	0.09	0.11	0.076	0.09	0.071	0.08	0.061	0.08	0.076	0.058
23	0.083	0.09	0.07	0.097	0.081	0.091	0.076	0.083	0.087	0.084	0.08	0.071	0.112	0.092	0.102	0.073	0.082	0.088	0.073	0.081	0.072	0.075	0.08	0.088	0.088	0.089	0.083	0.088	0.11	0.077	0.091	0.069	0.079	0.059	0.077	0.081	0.062
23.25	0.084	0.088	0.068	0.093	0.079	0.094	0.079	0.083	0.091	0.087	0.075	0.068	0.11	0.09	0.099	0.073	0.078	0.077	0.07	0.079	0.072	0.077	0.083	0.084	0.091	0.092	0.084	0.089	0.107	0.075	0.09	0.066	0.073	0.06	0.073	0.084	0.062
23.5	0.083	0.085	0.071	0.092	0.077	0.096	0.078	0.083	0.086	0.088	0.074	0.063	0.11	0.093	0.101	0.075	0.078	0.076	0.069	0.08	0.073	0.076	0.082	0.082	0.099	0.087	0.082	0.088	0.104	0.07	0.085	0.066	0.075	0.058	0.072	0.082	0.061
23.75	0.083	0.086	0.072	0.096	0.079	0.092	0.078	0.082	0.083	0.083	0.073	0.068	0.111	0.089	0.102	0.069	0.075	0.074	0.068	0.08	0.071	0.073	0.082	0.082	0.092	0.083	0.082	0.088	0.108	0.071	0.085	0.067	0.072	0.059	0.072	0.078	0.06
24	0.083	0.081	0.074	0.093	0.079	0.091	0.078	0.086	0.082	0.081	0.075	0.077	0.114	0.089	0.098	0.067	0.072	0.076	0.071	0.08	0.07	0.071	0.083	0.081	0.087	0.085	0.08	0.085	0.108	0.071	0.084	0.069	0.073	0.059	0.074	0.082	0.058
24.25	0.079	0.081	0.072	0.09	0.077	0.091	0.076	0.082	0.083	0.079	0.073	0.071	0.103	0.082	0.094	0.065	0.075	0.075	0.068	0.08	0.071	0.071	0.084	0.079	0.089	0.086	0.079	0.081	0.104	0.07	0.082	0.065	0.07	0.056	0.069	0.078	0.056
24.5	0.079	0.082	0.07	0.086	0.074	0.089	0.075	0.077	0.086	0.083	0.068	0.063	0.102	0.082	0.091	0.065	0.072	0.073	0.066	0.078	0.066	0.072	0.079	0.078	0.082	0.084	0.078	0.088	0.101	0.068	0.081	0.065	0.069	0.056	0.068	0.076	0.053
24.75	0.077	0.078	0.072	0.09	0.073	0.089	0.074	0.076	0.083	0.081	0.069	0.061	0.102	0.081	0.093	0.064	0.07	0.073	0.066	0.076	0.063	0.073	0.079	0.074	0.085	0.084	0.077	0.088	0.102	0.071	0.083	0.065	0.072	0.056	0.068	0.078	0.053
25	0.077	0.08	0.067	0.088	0.071	0.087	0.073	0.078	0.082	0.077	0.067	0.064	0.098	0.085	0.092	0.066	0.071	0.073	0.069	0.075	0.064	0.071	0.079	0.076	0.086	0.083	0.077	0.089	0.099	0.069	0.083	0.063	0.068	0.056	0.067	0.076	0.058
25.25	0.078	0.079	0.063	0.087	0.074	0.087	0.073	0.078	0.085	0.073	0.068	0.062	0.098	0.084	0.092	0.064	0.076	0.072	0.069	0.077	0.068	0.071	0.078	0.075	0.081	0.08	0.075	0.084	0.093	0.066	0.08	0.063	0.071	0.054	0.069	0.074	0.061
25.5	0.074	0.079	0.064	0.083	0.075	0.088	0.07	0.072	0.084	0.077	0.066	0.06	0.098	0.075	0.093	0.064	0.067	0.071	0.07	0.073	0.066	0.067	0.077	0.075	0.085	0.082	0.075	0.085	0.091	0.068	0.079	0.064	0.073	0.053	0.072	0.074	0.055
25.75	0.075	0.075	0.066	0.083	0.071	0.084	0.071	0.075	0.079	0.076	0.069	0.058	0.098	0.084	0.092	0.063	0.07	0.067	0.068	0.074	0.061	0.068	0.078	0.074	0.087	0.08	0.076	0.081	0.094	0.069	0.08	0.063	0.071	0.054	0.068	0.073	0.053
26	0.075	0.075	0.066	0.079	0.069	0.084	0.071	0.074	0.079	0.074	0.068	0.062	0.095	0.086	0.089	0.061	0.075	0.071	0.067	0.077	0.065	0.068	0.076	0.074	0.085	0.078	0.075	0.076	0.097	0.071	0.079	0.062	0.069	0.053	0.068	0.072	0.051
26.25	0.074	0.074	0.067	0.081	0.07	0.083	0.07	0.069	0.077	0.075	0.07	0.06	0.098	0.087	0.089	0.06	0.072	0.067	0.068	0.075	0.067	0.065	0.078	0.074	0.086	0.077	0.074	0.082	0.099	0.068	0.078	0.062	0.069	0.05	0.067	0.074	0.051
26.5	0.073	0.075	0.068	0.081	0.068	0.081	0.069	0.07	0.072	0.076	0.067	0.062	0.102	0.087	0.086	0.061	0.072	0.067	0.066	0.073	0.065	0.066	0.076	0.072	0.087	0.078	0.075	0.084	0.095	0.068	0.077	0.062	0.068	0.049	0.067	0.072	0.05
26.75	0.072	0.073	0.06	0.083	0.07	0.081	0.072	0.069	0.073	0.073	0.066	0.065	0.096	0.082	0.084	0.062	0.071	0.067	0.067	0.075	0.065	0.066	0.071	0.07	0.083	0.078	0.075	0.083	0.088	0.069	0.077	0.061	0.068	0.051	0.072	0.069	0.049
27	0.07	0.071	0.057	0.08	0.069	0.08	0.07	0.068	0.077	0.074	0.068	0.065	0.092	0.09	0.088	0.062	0.069	0.068	0.067	0.072	0.064	0.066	0.074	0.07	0.086	0.08	0.072	0.08	0.09	0.067	0.076	0.061	0.068	0.049	0.068	0.068	0.049
27.25	0.071	0.072	0.065	0.079	0.068	0.08	0.07	0.068	0.079	0.073	0.065	0.06	0.094	0.081	0.086	0.059	0.076	0.066	0.065	0.072	0.063	0.067	0.072	0.069	0.088	0.077	0.073	0.081	0.09	0.068	0.075	0.062	0.066	0.048	0.069	0.07	0.058
27.5	0.071	0.071	0.062	0.078	0.066	0.078	0.071	0.068	0.076	0.073	0.067	0.059	0.091	0.085	0.084	0.06	0.082	0.063	0.066	0.074	0.063	0.067	0.075	0.068	0.084	0.077	0.077	0.079	0.088	0.066	0.074	0.061	0.066	0.047	0.069	0.068	0.056
27.75	0.072	0.07	0.061	0.076	0.067	0.079	0.068	0.068	0.08	0.074	0.065	0.059	0.085	0.09	0.087	0.059	0.078	0.062	0.068	0.073	0.064	0.067	0.075	0.069	0.081	0.074	0.078	0.077	0.086	0.064	0.073	0.061	0.07	0.048	0.067	0.066	0.054
28	0.069	0.071	0.061	0.079	0.068	0.079	0.069	0.068	0.077	0.071	0.068	0.059	0.09	0.083	0.084	0.058	0.077	0.063	0.063	0.075	0.066	0.065	0.075	0.069	0.088	0.071	0.078	0.076	0.085	0.059	0.073	0.059	0.066	0.046	0.067	0.071	0.052
28.25	0.069	0.068	0.058	0.077	0.068	0.076	0.067	0.065	0.076	0.067	0.067	0.057	0.091	0.082	0.082	0.056	0.07	0.064	0.064	0.072	0.063	0.065	0.077	0.067	0.083	0.074	0.076	0.08	0.088	0.061	0.075	0.059	0.064	0.044	0.062	0.07	0.051
28.5	0.067	0.07	0.063	0.073	0.067	0.079	0.066	0.07	0.077	0.069	0.066	0.058	0.096	0.085	0.078	0.054	0.067	0.063	0.063	0.074	0.064	0.064	0.078	0.066	0.082	0.077	0.073	0.079	0.086	0.062	0.074	0.06	0.065	0.043	0.064	0.069	0.056
28.75	0.069	0.069	0.066	0.071	0.067	0.08	0.065	0.067	0.071	0.071	0.061	0.059	0.089	0.085	0.08	0.059	0.067	0.058	0.063	0.077	0.064	0.062	0.074	0.068	0.083	0.077	0.074	0.079	0.083	0.062	0.073	0.06	0.065	0.044	0.063	0.063	0.056
29	0.071	0.069	0.064	0.074	0.068	0.079	0.066	0.064	0.069	0.072	0.067	0.056	0.085	0.086	0.079	0.059	0.07	0.059	0.064	0.073	0.06	0.06	0.071	0.067	0.079	0.074	0.072	0.076	0.083	0.065	0.071	0.057	0.063	0.044	0.062	0.06	0.053
29.25	0.069	0.071	0.062	0.074	0.067	0.077	0.065	0.066	0.074	0.07	0.069	0.057	0.082	0.083	0.078	0.056	0.073	0.058	0.061	0.071	0.063	0.063	0.073	0.066	0.084	0.071	0.072	0.074	0.082	0.065	0.072	0.058	0.062	0.043	0.065	0.066	0.055
29.5	0.067	0.07	0.062	0.076	0.064	0.075	0.063	0.066	0.071	0.068	0.067	0.051	0.084	0.085	0.078	0.056	0.071	0.059	0.061	0.071	0.062	0.062	0.073	0.064	0.081	0.071	0.072	0.073	0.081	0.066	0.07	0.06	0.061	0.042	0.063	0.066	0.055
29.75	0.069	0.069	0.067	0.074	0.064	0.078	0.062	0.066	0.069	0.068	0.065	0.051	0.078	0.083	0.077	0.056	0.064	0.061	0.061	0.071	0.062	0.061	0.073	0.067	0.079	0.069	0.072	0.074	0.081	0.062	0.069	0.057	0.06	0.041	0.061	0.064	0.053
30	0.069	0.069	0.063	0.072	0.066	0.075	0.064	0.063	0.07	0.07	0.062	0.054	0.08	0.079	0.08	0.058	0.069	0.06	0.06	0.073	0.062	0.061	0.076	0.067	0.081	0.072	0.071	0.077	0.076	0.062	0.07	0.055	0.06	0.042	0.063	0.061	0.056
30.25	0.067	0.073	0.064	0.074	0.067	0.076	0.067	0.061	0.071	0.066	0.064	0.058	0.082	0.083	0.078	0.058	0.072	0.06	0.059	0.072	0.062	0.062	0.074	0.063	0.08	0.073	0.071	0.071	0.074	0.062	0.069	0.056	0.057	0.043	0.063	0.057	0.053
30.5	0.066	0.07	0.064	0.074	0.066	0.075	0.064	0.065	0.072	0.066	0.062	0.058	0.082	0.083	0.078	0.055	0.066	0.058	0.059	0.073	0.058	0.06	0.07	0.061	0.082	0.072	0.073	0.068	0.073	0.062	0.071	0.057	0.06	0.041	0.061	0.061	0.048
30.75	0.066	0.07	0.063	0.071	0.069	0.075	0.06	0.064	0.073	0.07	0.061	0.056	0.078	0.093	0.078	0.057	0.066	0.06	0.062	0.072	0.061	0.059	0.072	0.061	0.084	0.073	0.071	0.067	0.074	0.062	0.068	0.058	0.063	0.04	0.061	0.062	0.05
31	0.066	0.07	0.062	0.073	0.067	0.079	0.062	0.065	0.073	0.068	0.064	0.057	0.078	0.087	0.077	0.059	0.076	0.059	0.061	0.073	0.06	0.057	0.075	0.061	0.089	0.075	0.069	0.068	0.073	0.06	0.066	0.059	0.061	0.041	0.062	0.062	0.054
31.25	0.067	0.07	0.061	0.073	0.067	0.076	0.063	0.062	0.071	0.067	0.062	0.056	0.08	0.086	0.079	0.059	0.073	0.055	0.062	0.071	0.06	0.059	0.074	0.06	0.082	0.073	0.069	0.068	0.073	0.064	0.069	0.058	0.062	0.041	0.059	0.062	0.053
31.5	0.069	0.069	0.058	0.073	0.064	0.075	0.064	0.063	0.069	0.065	0.063	0.052	0.078	0.085	0.079	0.057	0.064	0.057	0.06	0.074	0.06	0.059	0.071	0.06	0.085	0.073	0.072	0.065	0.073	0.067	0.068	0.055	0.063	0.042	0.059	0.061	0.053
31.75	0.069	0.068	0.056	0.074	0.067	0.078	0.064	0.065	0.07	0.065	0.067	0.054	0.076	0.091	0.075	0.055	0.072	0.061	0.058	0.071	0.064	0.06	0.071	0.062	0.085	0.073	0.072	0.066	0.073	0.067	0.066	0.057	0.063	0.042	0.058	0.06	0.056
32	0.068	0.071	0.059	0.07	0.065	0.073	0.064	0.062	0.073	0.065	0.067	0.063	0.078	0.095	0.079	0.054	0.069	0.059	0.063	0.073	0.062	0.06	0.075	0.063	0.087	0.072	0.07	0.066	0.074	0.063	0.066	0.06	0.058	0.042	0.06	0.058	0.057
32.25	0.067	0.07	0.062	0.072	0.066	0.075	0.064	0.057	0.073	0.067	0.062	0.054	0.077	0.085	0.079	0.058	0.07	0.062	0.061	0.077	0.06	0.057	0.074	0.063	0.084	0.072	0.07	0.066	0.072	0.064	0.066	0.055	0.059	0.041	0.057	0.058	0.053
32.5	0.066	0.069	0.061	0.073	0.067	0.078	0.063	0.062	0.07	0.067	0.062	0.055	0.081	0.092	0.075	0.056	0.07	0.06	0.06	0.073	0.06	0.056	0.072	0.061	0.08	0.07	0.069	0.063	0.07	0.064	0.065	0.056	0.061	0.041	0.056	0.056	0.054
32.75	0.065	0.07	0.064	0.071	0.065	0.077	0.062	0.063	0.069	0.067	0.063	0.055	0.076	0.09	0.073	0.055	0.071	0.059	0.062	0.075	0.059	0.06	0.074	0.061	0.084	0.069	0.07	0.06	0.068	0.065	0.063	0.056	0.061	0.042	0.058	0.056	0.053
33	0.067	0.069	0.06	0.07	0.069	0.079	0.061	0.065	0.067	0.067	0.059	0.054	0.072	0.09	0.075	0.057	0.072	0.06	0.06	0.077	0.062	0.061	0.075	0.059	0.088	0.07	0.069	0.059	0.068	0.064	0.062	0.058	0.06	0.04	0.056	0.056	0.052
33.25	0.068	0.067	0.064	0.069	0.068	0.077	0.061	0.063	0.068	0.068	0.061	0.051	0.073	0.089	0.074	0.054	0.066	0.06	0.061	0.076	0.062	0.06	0.077	0.059	0.09	0.07	0.07	0.063	0.066	0.064	0.064	0.056	0.061	0.041	0.057	0.055	0.057
33.5	0.066	0.066	0.063	0.066	0.064	0.073	0.062	0.064	0.067	0.067	0.066	0.054	0.073	0.082	0.074	0.054	0.073	0.059	0.06	0.079	0.061	0.059	0.074	0.058	0.087	0.071	0.07	0.062	0.068	0.06	0.065	0.056	0.059	0.042	0.056	0.055	0.058
33.75	0.069	0.065	0.06	0.068	0.064	0.072	0.063	0.063	0.069	0.068	0.063	0.056	0.07	0.08	0.075	0.055	0.071	0.06	0.06	0.079	0.056	0.058	0.074	0.06	0.084	0.072	0.07	0.061	0.067	0.063	0.066	0.058	0.059	0.042	0.056	0.054	0.052
34	0.069	0.068	0.059	0.065	0.068	0.077	0.064	0.062	0.069	0.07	0.066	0.057	0.071	0.089	0.078	0.054	0.068	0.059	0.064	0.076	0.057	0.057	0.073	0.06	0.087	0.073	0.07	0.065	0.067	0.066	0.063	0.058	0.06	0.043	0.058	0.054	0.056
34.25	0.069	0.068	0.057	0.068	0.067	0.081	0.063	0.065	0.068	0.072	0.066	0.053	0.073	0.088	0.075	0.056	0.066	0.058	0.063	0.077	0.058	0.058	0.071	0.06	0.091	0.071	0.07	0.063	0.068	0.064	0.061	0.057	0.06	0.041	0.059	0.052	0.059
34.5	0.068	0.066	0.056	0.069	0.066	0.075	0.062	0.064	0.072	0.069	0.067	0.053	0.073	0.09	0.075	0.054	0.071	0.062	0.061	0.076	0.058	0.058	0.069	0.06	0.082	0.07	0.07	0.061	0.066	0.063	0.058	0.057	0.062	0.041	0.055	0.053	0.056
34.75	0.068	0.066	0.058	0.071	0.069	0.074	0.062	0.065	0.068	0.066	0.062	0.051	0.076	0.08	0.075	0.056	0.072	0.061	0.065	0.079	0.061	0.059	0.073	0.061	0.084	0.067	0.07	0.061	0.065	0.065	0.059	0.057	0.064	0.04	0.053	0.054	0.054
35	0.068	0.066	0.062	0.072	0.068	0.077	0.064	0.065	0.071	0.068	0.064	0.052	0.075	0.072	0.074	0.055	0.065	0.058	0.062	0.08	0.065	0.061	0.072	0.06	0.082	0.069	0.071	0.059	0.065	0.065	0.062	0.06	0.062	0.04	0.054	0.05	0.053
35.25	0.068	0.065	0.062	0.068	0.067	0.078	0.063	0.067	0.072	0.071	0.066	0.054	0.074	0.076	0.074	0.053	0.072	0.062	0.063	0.078	0.065	0.059	0.075	0.059	0.09	0.07	0.068	0.058	0.066	0.064	0.062	0.059	0.062	0.04	0.056	0.049	0.052
35.5	0.067	0.068	0.063	0.069	0.065	0.076	0.062	0.064	0.072	0.068	0.066	0.052	0.078	0.087	0.076	0.056	0.072	0.063	0.064	0.077	0.065	0.057	0.075	0.06	0.088	0.069	0.068	0.061	0.064	0.066	0.059	0.058	0.061	0.04	0.055	0.052	0.053
35.75	0.072	0.069	0.062	0.069	0.068	0.073	0.064	0.067	0.069	0.069	0.064	0.055	0.078	0.083	0.077	0.058	0.073	0.062	0.063	0.076	0.062	0.059	0.074	0.062	0.09	0.069	0.069	0.057	0.065	0.066	0.059	0.058	0.059	0.04	0.053	0.053	0.049
36	0.071	0.068	0.058	0.067	0.07	0.072	0.065	0.065	0.069	0.067	0.061	0.052	0.075	0.08	0.073	0.06	0.064	0.061	0.063	0.078	0.062	0.059	0.074	0.062	0.089	0.067	0.07	0.058	0.064	0.068	0.057	0.059	0.06	0.04	0.053	0.05	0.049
36.25	0.068	0.071	0.058	0.067	0.07	0.075	0.064	0.062	0.071	0.067	0.065	0.052	0.077	0.082	0.073	0.056	0.071	0.059	0.064	0.079	0.062	0.061	0.071	0.061	0.087	0.067	0.07	0.057	0.062	0.063	0.056	0.058	0.06	0.04	0.052	0.053	0.051
36.5	0.07	0.072	0.057	0.066	0.069	0.077	0.064	0.063	0.073	0.068	0.063	0.054	0.079	0.079	0.073	0.052	0.065	0.059	0.064	0.078	0.062	0.057	0.071	0.061	0.089	0.069	0.071	0.057	0.062	0.063	0.057	0.059	0.06	0.039	0.052	0.053	0.053
36.75	0.072	0.069	0.058	0.069	0.067	0.08	0.067	0.065	0.07	0.068	0.062	0.052	0.076	0.08	0.074	0.056	0.068	0.057	0.061	0.083	0.06	0.058	0.077	0.06	0.09	0.068	0.069	0.058	0.062	0.066	0.057	0.058	0.058	0.041	0.054	0.05	0.056
37	0.072	0.074	0.058	0.067	0.068	0.081	0.066	0.066	0.067	0.069	0.063	0.053	0.073	0.082	0.076	0.057	0.074	0.055	0.061	0.084	0.059	0.059	0.078	0.061	0.092	0.069	0.07	0.058	0.062	0.063	0.056	0.059	0.056	0.04	0.057	0.048	0.056
37.25	0.07	0.075	0.059	0.069	0.067	0.078	0.063	0.066	0.07	0.069	0.063	0.054	0.073	0.078	0.078	0.055	0.07	0.055	0.062	0.08	0.06	0.058	0.073	0.061	0.086	0.072	0.073	0.058	0.062	0.064	0.055	0.062	0.055	0.039	0.056	0.051	0.052
37.5	0.07	0.073	0.059	0.069	0.067	0.078	0.064	0.063	0.068	0.072	0.065	0.052	0.072	0.07	0.075	0.056	0.071	0.061	0.061	0.082	0.063	0.058	0.073	0.062	0.092	0.069	0.071	0.059	0.059	0.061	0.054	0.06	0.055	0.04	0.05	0.05	0.049
37.75	0.07	0.072	0.055	0.069	0.069	0.078	0.066	0.065	0.068	0.073	0.065	0.049	0.075	0.075	0.074	0.053	0.068	0.059	0.059	0.081	0.062	0.058	0.073	0.065	0.088	0.068	0.071	0.059	0.061	0.06	0.054	0.057	0.055	0.04	0.052	0.048	0.054
38	0.069	0.072	0.054	0.067	0.068	0.078	0.064	0.066	0.067	0.072	0.062	0.049	0.071	0.076	0.073	0.052	0.07	0.055	0.06	0.084	0.061	0.059	0.07	0.062	0.09	0.069	0.072	0.056	0.06	0.06	0.055	0.058	0.054	0.039	0.052	0.046	0.054
38.25	0.07	0.073	0.058	0.065	0.07	0.079	0.066	0.064	0.071	0.072	0.066	0.051	0.07	0.076	0.073	0.051	0.066	0.056	0.061	0.083	0.061	0.058	0.073	0.061	0.093	0.069	0.073	0.054	0.062	0.064	0.056	0.059	0.056	0.039	0.051	0.048	0.049
38.5	0.071	0.072	0.06	0.072	0.07	0.08	0.066	0.066	0.068	0.071	0.065	0.052	0.074	0.072	0.073	0.052	0.071	0.053	0.062	0.081	0.061	0.057	0.075	0.062	0.097	0.067	0.073	0.056	0.061	0.064	0.054	0.056	0.058	0.04	0.048	0.048	0.052
38.75	0.071	0.073	0.058	0.069	0.07	0.08	0.065	0.066	0.07	0.072	0.063	0.053	0.067	0.068	0.075	0.053	0.075	0.054	0.062	0.078	0.059	0.058	0.074	0.063	0.096	0.069	0.072	0.055	0.061	0.06	0.053	0.058	0.056	0.039	0.051	0.046	0.051
39	0.073	0.074	0.058	0.068	0.068	0.08	0.067	0.065	0.071	0.072	0.059	0.049	0.068	0.069	0.075	0.054	0.076	0.055	0.061	0.075	0.058	0.057	0.071	0.062	0.093	0.072	0.07	0.056	0.06	0.06	0.053	0.055	0.055	0.038	0.052	0.047	0.05
39.25	0.072	0.075	0.057	0.07	0.067	0.079	0.069	0.063	0.071	0.07	0.064	0.05	0.068	0.074	0.072	0.051	0.071	0.053	0.062	0.08	0.059	0.057	0.068	0.062	0.092	0.069	0.069	0.053	0.063	0.06	0.051	0.055	0.058	0.038	0.05	0.049	0.05
39.5	0.073	0.076	0.062	0.07	0.069	0.08	0.066	0.063	0.067	0.068	0.065	0.05	0.068	0.071	0.073	0.054	0.066	0.054	0.064	0.077	0.06	0.056	0.069	0.062	0.096	0.067	0.069	0.054	0.06	0.059	0.05	0.055	0.056	0.037	0.048	0.047	0.047
39.75	0.075	0.073	0.055	0.069	0.07	0.079	0.065	0.067	0.069	0.071	0.066	0.048	0.071	0.064	0.071	0.053	0.069	0.053	0.061	0.077	0.063	0.056	0.072	0.061	0.094	0.067	0.072	0.052	0.06	0.057	0.05	0.056	0.053	0.038	0.049	0.043	0.047
40	0.077	0.07	0.057	0.068	0.071	0.078	0.068	0.067	0.07	0.074	0.064	0.047	0.071	0.063	0.07	0.051	0.069	0.053	0.06	0.077	0.061	0.058	0.074	0.06	0.093	0.067	0.07	0.052	0.058	0.06	0.048	0.055	0.053	0.037	0.047	0.043	0.048
40.25	0.074	0.072	0.052	0.07	0.07	0.079	0.068	0.069	0.069	0.074	0.064	0.046	0.072	0.067	0.07	0.049	0.072	0.055	0.061	0.08	0.059	0.056	0.076	0.061	0.094	0.069	0.068	0.051	0.057	0.058	0.048	0.053	0.053	0.037	0.047	0.042	0.049
40.5	0.074	0.072	0.051	0.066	0.067	0.078	0.066	0.066	0.07	0.072	0.062	0.048	0.077	0.064	0.07	0.048	0.07	0.053	0.059	0.081	0.06	0.057	0.072	0.061	0.094	0.067	0.069	0.051	0.058	0.055	0.048	0.052	0.054	0.037	0.047	0.042	0.046
40.75	0.072	0.072	0.051	0.069	0.068	0.081	0.067	0.064	0.072	0.074	0.06	0.048	0.074	0.063	0.068	0.046	0.076	0.053	0.06	0.076	0.062	0.055	0.067	0.06	0.093	0.065	0.068	0.049	0.057	0.057	0.046	0.055	0.053	0.036	0.049	0.04	0.048
41	0.071	0.072	0.051	0.073	0.07	0.079	0.07	0.066	0.072	0.073	0.061	0.051	0.072	0.062	0.07	0.045	0.072	0.05	0.061	0.078	0.06	0.056	0.071	0.061	0.102	0.066	0.067	0.05	0.056	0.057	0.045	0.055	0.052	0.037	0.048	0.04	0.047
41.25	0.073	0.07	0.056	0.072	0.068	0.078	0.068	0.066	0.069	0.073	0.062	0.049	0.074	0.061	0.069	0.048	0.073	0.051	0.058	0.073	0.061	0.055	0.072	0.06	0.1	0.066	0.066	0.05	0.057	0.055	0.046	0.055	0.051	0.037	0.044	0.043	0.043
41.5	0.074	0.073	0.056	0.073	0.069	0.079	0.07	0.063	0.069	0.073	0.057	0.047	0.072	0.059	0.068	0.05	0.067	0.048	0.058	0.071	0.061	0.053	0.069	0.058	0.104	0.066	0.066	0.05	0.058	0.056	0.045	0.052	0.052	0.035	0.043	0.04	0.044
41.75	0.075	0.074	0.053	0.072	0.069	0.08	0.07	0.066	0.068	0.073	0.058	0.05	0.07	0.06	0.065	0.048	0.068	0.048	0.058	0.074	0.064	0.052	0.071	0.059	0.099	0.067	0.065	0.048	0.056	0.06	0.045	0.051	0.05	0.035	0.047	0.039	0.043
42	0.075	0.074	0.052	0.07	0.068	0.078	0.07	0.067	0.068	0.073	0.06	0.074	0.07	0.072	0.062	0.047	0.064	0.048	0.058	0.072	0.064	0.053	0.068	0.059	0.098	0.066	0.066	0.047	0.056	0.063	0.045	0.051	0.051	0.034	0.046	0.039	0.044
42.25	0.075	0.076	0.054	0.07	0.065	0.079	0.07	0.066	0.069	0.075	0.055	0.049	0.067	0.062	0.063	0.047	0.065	0.047	0.058	0.071	0.06	0.054	0.066	0.06	0.1	0.066	0.064	0.046	0.053	0.056	0.043	0.05	0.053	0.033	0.045	0.041	0.044
42.5	0.075	0.074	0.052	0.069	0.066	0.081	0.071	0.065	0.068	0.075	0.058	0.043	0.066	0.057	0.064	0.045	0.061	0.047	0.054	0.07	0.061	0.052	0.066	0.06	0.099	0.068	0.063	0.048	0.051	0.054	0.044	0.051	0.054	0.033	0.044	0.039	0.043
42.75	0.074	0.075	0.05	0.069	0.067	0.079	0.07	0.066	0.067	0.072	0.059	0.046	0.068	0.053	0.064	0.044	0.056	0.047	0.053	0.07	0.06	0.051	0.066	0.058	0.1	0.064	0.063	0.047	0.052	0.055	0.044	0.049	0.051	0.033	0.042	0.038	0.044
43	0.074	0.074	0.054	0.068	0.067	0.078	0.069	0.065	0.066	0.073	0.052	0.044	0.069	0.052	0.062	0.045	0.06	0.05	0.054	0.069	0.06	0.051	0.067	0.06	0.098	0.064	0.062	0.048	0.051	0.054	0.044	0.048	0.048	0.032	0.043	0.04	0.047
43.25	0.073	0.074	0.051	0.067	0.066	0.076	0.069	0.067	0.064	0.073	0.053	0.045	0.065	0.056	0.059	0.043	0.065	0.048	0.055	0.07	0.061	0.053	0.064	0.06	0.097	0.065	0.061	0.045	0.052	0.052	0.042	0.048	0.047	0.033	0.041	0.039	0.053
43.5	0.076	0.074	0.05	0.065	0.064	0.078	0.07	0.063	0.067	0.073	0.053	0.047	0.06	0.052	0.059	0.044	0.062	0.047	0.054	0.065	0.061	0.052	0.067	0.058	0.102	0.064	0.061	0.045	0.052	0.053	0.041	0.048	0.044	0.031	0.042	0.036	0.042
43.75	0.075	0.069	0.052	0.066	0.062	0.08	0.07	0.06	0.065	0.073	0.053	0.045	0.063	0.051	0.059	0.042	0.06	0.047	0.054	0.068	0.057	0.052	0.065	0.056	0.102	0.063	0.06	0.047	0.053	0.051	0.042	0.047	0.047	0.031	0.043	0.037	0.043
44	0.071	0.073	0.051	0.068	0.063	0.078	0.071	0.065	0.064	0.071	0.052	0.043	0.062	0.059	0.058	0.039	0.062	0.045	0.051	0.07	0.054	0.052	0.066	0.056	0.101	0.063	0.059	0.045	0.053	0.05	0.04	0.044	0.045	0.031	0.04	0.039	0.039
44.25	0.073	0.075	0.048	0.066	0.067	0.077	0.072	0.066	0.066	0.069	0.051	0.04	0.059	0.052	0.058	0.04	0.059	0.044	0.051	0.065	0.059	0.047	0.065	0.057	0.101	0.063	0.058	0.045	0.053	0.05	0.04	0.044	0.045	0.03	0.039	0.037	0.039
44.5	0.073	0.071	0.048	0.065	0.065	0.077	0.071	0.064	0.068	0.07	0.052	0.042	0.063	0.049	0.057	0.042	0.062	0.044	0.051	0.064	0.06	0.049	0.062	0.055	0.096	0.062	0.058	0.044	0.051	0.05	0.039	0.044	0.045	0.029	0.041	0.036	0.039
44.75	0.072	0.073	0.05	0.064	0.065	0.075	0.071	0.063	0.069	0.073	0.051	0.041	0.063	0.052	0.053	0.041	0.061	0.046	0.05	0.067	0.058	0.051	0.066	0.055	0.092	0.062	0.057	0.041	0.05	0.05	0.04	0.044	0.052	0.028	0.041	0.036	0.037
45	0.073	0.072	0.049	0.066	0.067	0.073	0.072	0.058	0.064	0.072	0.052	0.042	0.12	0.053	0.055	0.04	0.062	0.044	0.05	0.065	0.057	0.049	0.064	0.055	0.096	0.063	0.058	0.042	0.048	0.052	0.039	0.043	0.065	0.029	0.038	0.038	0.035
55	0.054*	0.066*	0.04*	0.051*	0.046*	0.061*	0.057*	0.048*	0.05*	0.062*	0.034*	0.03*	0.048*	0.041*	0.035*	0.032*	0.055*	0.035*	0.041*	0.052*	0.045*	0.033*	0.05*	0.041*	0.071*	0.054*	0.039*	0.036*	0.038*	0.042*	0.031*	0.03*	0.03*	0.019*	0.03*	0.026*	0.024*				0.054	0.066	0.04	0.051	0.046	0.061	0.057	0.048	0.05
55.25	0.053*	0.065*	0.042*	0.05*	0.045*	0.062*	0.059*	0.047*	0.049*	0.062*	0.034*	0.031*	0.047*	0.04*	0.036*	0.032*	0.057*	0.036*	0.041*	0.051*	0.045*	0.036*	0.051*	0.04*	0.07*	0.054*	0.039*	0.035*	0.038*	0.042*	0.032*	0.029*	0.031*	0.018*	0.028*	0.026*	0.024*				0.053	0.065	0.042	0.05	0.045	0.062	0.059	0.047	0.049
55.5	0.055*	0.065*	0.042*	0.05*	0.044*	0.062*	0.058*	0.047*	0.05*	0.061*	0.033*	0.031*	0.05*	0.04*	0.036*	0.032*	0.05*	0.035*	0.039*	0.049*	0.044*	0.037*	0.051*	0.04*	0.071*	0.054*	0.039*	0.034*	0.037*	0.041*	0.032*	0.029*	0.031*	0.018*	0.027*	0.025*	0.023*				0.055	0.065	0.042	0.05	0.044	0.062	0.058	0.047	0.05
55.75	0.054*	0.068*	0.041*	0.05*	0.046*	0.065*	0.058*	0.049*	0.052*	0.061*	0.033*	0.031*	0.051*	0.04*	0.035*	0.031*	0.059*	0.034*	0.04*	0.05*	0.046*	0.034*	0.05*	0.039*	0.07*	0.053*	0.038*	0.034*	0.036*	0.039*	0.032*	0.029*	0.03*	0.018*	0.027*	0.025*	0.024*				0.054	0.068	0.041	0.05	0.046	0.065	0.058	0.049	0.052
56	0.053*	0.064*	0.039*	0.049*	0.045*	0.064*	0.055*	0.046*	0.049*	0.061*	0.031*	0.031*	0.048*	0.041*	0.034*	0.032*	0.053*	0.034*	0.039*	0.049*	0.047*	0.035*	0.048*	0.039*	0.069*	0.052*	0.038*	0.035*	0.037*	0.042*	0.032*	0.028*	0.029*	0.018*	0.028*	0.026*	0.024*				0.053	0.064	0.039	0.049	0.045	0.064	0.055	0.046	0.049
56.25	0.053*	0.066*	0.038*	0.048*	0.045*	0.063*	0.056*	0.048*	0.048*	0.059*	0.031*	0.032*	0.051*	0.04*	0.033*	0.032*	0.051*	0.032*	0.04*	0.048*	0.045*	0.034*	0.051*	0.039*	0.067*	0.052*	0.038*	0.035*	0.038*	0.041*	0.031*	0.028*	0.03*	0.017*	0.029*	0.024*	0.022*				0.053	0.066	0.038	0.048	0.045	0.063	0.056	0.048	0.048
56.5	0.054*	0.068*	0.037*	0.049*	0.045*	0.062*	0.056*	0.048*	0.048*	0.058*	0.032*	0.031*	0.056*	0.04*	0.033*	0.031*	0.054*	0.032*	0.04*	0.049*	0.043*	0.033*	0.049*	0.038*	0.067*	0.05*	0.038*	0.033*	0.038*	0.041*	0.031*	0.027*	0.031*	0.018*	0.028*	0.024*	0.023*				0.054	0.068	0.037	0.049	0.045	0.062	0.056	0.048	0.048
56.75	0.053*	0.066*	0.038*	0.047*	0.046*	0.062*	0.054*	0.046*	0.047*	0.06*	0.031*	0.031*	0.055*	0.042*	0.033*	0.029*	0.051*	0.031*	0.039*	0.048*	0.043*	0.032*	0.048*	0.039*	0.065*	0.051*	0.037*	0.034*	0.037*	0.041*	0.031*	0.027*	0.031*	0.017*	0.027*	0.024*	0.022*				0.053	0.066	0.038	0.047	0.046	0.062	0.054	0.046	0.047
57	0.052*	0.066*	0.039*	0.045*	0.045*	0.062*	0.056*	0.048*	0.045*	0.061*	0.031*	0.031*	0.05*	0.04*	0.033*	0.031*	0.05*	0.032*	0.039*	0.048*	0.043*	0.033*	0.048*	0.04*	0.064*	0.051*	0.037*	0.034*	0.036*	0.043*	0.031*	0.027*	0.031*	0.017*	0.027*	0.024*	0.021*				0.052	0.066	0.039	0.045	0.045	0.062	0.056	0.048	0.045
57.25	0.051*	0.066*	0.037*	0.046*	0.044*	0.061*	0.053*	0.045*	0.047*	0.061*	0.028*	0.038*	0.047*	0.038*	0.031*	0.031*	0.05*	0.033*	0.038*	0.047*	0.043*	0.033*	0.049*	0.039*	0.064*	0.05*	0.037*	0.034*	0.037*	0.043*	0.03*	0.026*	0.03*	0.017*	0.028*	0.024*	0.022*				0.051	0.066	0.037	0.046	0.044	0.061	0.053	0.045	0.047
57.5	0.051*	0.064*	0.044*	0.047*	0.043*	0.061*	0.054*	0.044*	0.048*	0.061*	0.029*	0.054*	0.048*	0.05*	0.032*	0.031*	0.053*	0.033*	0.038*	0.047*	0.045*	0.033*	0.05*	0.039*	0.067*	0.05*	0.036*	0.034*	0.036*	0.046*	0.03*	0.026*	0.03*	0.017*	0.027*	0.025*	0.022*				0.051	0.064	0.044	0.047	0.043	0.061	0.054	0.044	0.048
57.75	0.047*	0.063*	0.039*	0.046*	0.043*	0.061*	0.055*	0.047*	0.048*	0.061*	0.03*	0.033*	0.045*	0.037*	0.032*	0.03*	0.052*	0.032*	0.04*	0.047*	0.044*	0.032*	0.047*	0.039*	0.065*	0.051*	0.036*	0.034*	0.036*	0.041*	0.03*	0.026*	0.029*	0.017*	0.027*	0.024*	0.02*				0.047	0.063	0.039	0.046	0.043	0.061	0.055	0.047	0.048
58	0.049*	0.064*	0.035*	0.044*	0.042*	0.064*	0.054*	0.049*	0.048*	0.06*	0.03*	0.029*	0.046*	0.034*	0.031*	0.029*	0.051*	0.032*	0.039*	0.048*	0.043*	0.031*	0.048*	0.038*	0.062*	0.051*	0.036*	0.034*	0.036*	0.04*	0.029*	0.026*	0.029*	0.017*	0.028*	0.024*	0.019*				0.049	0.064	0.035	0.044	0.042	0.064	0.054	0.049	0.048
58.25	0.049*	0.062*	0.037*	0.043*	0.042*	0.063*	0.054*	0.049*	0.047*	0.061*	0.028*	0.029*	0.047*	0.042*	0.031*	0.028*	0.049*	0.031*	0.038*	0.05*	0.043*	0.032*	0.048*	0.038*	0.062*	0.052*	0.037*	0.035*	0.035*	0.039*	0.028*	0.026*	0.029*	0.017*	0.027*	0.024*	0.02*				0.049	0.062	0.037	0.043	0.042	0.063	0.054	0.049	0.047
58.5	0.049*	0.06*	0.038*	0.042*	0.04*	0.061*	0.055*	0.046*	0.047*	0.06*	0.028*	0.027*	0.049*	0.042*	0.031*	0.029*	0.05*	0.031*	0.038*	0.051*	0.043*	0.03*	0.046*	0.038*	0.064*	0.05*	0.036*	0.034*	0.035*	0.038*	0.029*	0.026*	0.029*	0.018*	0.025*	0.025*	0.021*				0.049	0.06	0.038	0.042	0.04	0.061	0.055	0.046	0.047
58.75	0.048*	0.061*	0.039*	0.042*	0.04*	0.062*	0.054*	0.046*	0.047*	0.06*	0.028*	0.028*	0.046*	0.04*	0.031*	0.03*	0.058*	0.03*	0.038*	0.049*	0.043*	0.031*	0.048*	0.037*	0.063*	0.05*	0.036*	0.033*	0.036*	0.041*	0.028*	0.025*	0.027*	0.017*	0.024*	0.025*	0.022*				0.048	0.061	0.039	0.042	0.04	0.062	0.054	0.046	0.047
59	0.048*	0.061*	0.037*	0.041*	0.041*	0.061*	0.053*	0.044*	0.047*	0.058*	0.028*	0.029*	0.046*	0.038*	0.03*	0.028*	0.055*	0.031*	0.037*	0.047*	0.042*	0.03*	0.047*	0.037*	0.065*	0.051*	0.037*	0.034*	0.035*	0.04*	0.03*	0.024*	0.029*	0.016*	0.024*	0.024*	0.021*				0.048	0.061	0.037	0.041	0.041	0.061	0.053	0.044	0.047
59.25	0.048*	0.058*	0.036*	0.041*	0.041*	0.059*	0.052*	0.044*	0.044*	0.06*	0.027*	0.028*	0.046*	0.039*	0.031*	0.029*	0.051*	0.032*	0.036*	0.047*	0.041*	0.031*	0.046*	0.037*	0.067*	0.051*	0.036*	0.033*	0.035*	0.039*	0.029*	0.025*	0.028*	0.016*	0.022*	0.023*	0.021*				0.048	0.058	0.036	0.041	0.041	0.059	0.052	0.044	0.044
59.5	0.05*	0.059*	0.038*	0.041*	0.043*	0.058*	0.052*	0.045*	0.045*	0.06*	0.028*	0.029*	0.046*	0.038*	0.029*	0.028*	0.05*	0.029*	0.036*	0.046*	0.039*	0.03*	0.048*	0.038*	0.065*	0.049*	0.036*	0.033*	0.035*	0.039*	0.029*	0.024*	0.027*	0.016*	0.024*	0.022*	0.019*				0.05	0.059	0.038	0.041	0.043	0.058	0.052	0.045	0.045
59.75	0.05*	0.059*	0.037*	0.042*	0.042*	0.058*	0.054*	0.044*	0.046*	0.06*	0.027*	0.028*	0.045*	0.038*	0.029*	0.027*	0.054*	0.029*	0.035*	0.046*	0.038*	0.029*	0.049*	0.038*	0.058*	0.05*	0.036*	0.034*	0.035*	0.038*	0.028*	0.024*	0.028*	0.016*	0.025*	0.022*	0.02*				0.05	0.059	0.037	0.042	0.042	0.058	0.054	0.044	0.046
60	0.047*	0.059*	0.037*	0.041*	0.041*	0.057*	0.054*	0.045*	0.047*	0.062*	0.027*	0.026*	0.045*	0.037*	0.029*	0.028*	0.052*	0.03*	0.037*	0.045*	0.039*	0.029*	0.048*	0.037*	0.061*	0.049*	0.035*	0.032*	0.034*	0.038*	0.029*	0.023*	0.029*	0.016*	0.025*	0.023*	0.018*				0.047	0.059	0.037	0.041	0.041	0.057	0.054	0.045	0.047
60.25	0.045*	0.058*	0.036*	0.041*	0.04*	0.058*	0.053*	0.045*	0.045*	0.059*	0.027*	0.027*	0.044*	0.035*	0.029*	0.028*	0.05*	0.031*	0.037*	0.044*	0.039*	0.029*	0.048*	0.036*	0.061*	0.049*	0.034*	0.033*	0.035*	0.037*	0.029*	0.023*	0.029*	0.016*	0.023*	0.023*	0.018*				0.045	0.058	0.036	0.041	0.04	0.058	0.053	0.045	0.045
60.5	0.045*	0.058*	0.035*	0.04*	0.04*	0.058*	0.053*	0.043*	0.045*	0.058*	0.027*	0.028*	0.043*	0.037*	0.029*	0.026*	0.047*	0.031*	0.037*	0.046*	0.037*	0.028*	0.045*	0.036*	0.06*	0.047*	0.034*	0.033*	0.035*	0.037*	0.029*	0.024*	0.027*	0.016*	0.022*	0.022*	0.02*				0.045	0.058	0.035	0.04	0.04	0.058	0.053	0.043	0.045
60.75	0.045*	0.059*	0.034*	0.04*	0.039*	0.058*	0.053*	0.042*	0.044*	0.06*	0.027*	0.026*	0.045*	0.037*	0.029*	0.026*	0.048*	0.029*	0.036*	0.044*	0.036*	0.029*	0.046*	0.036*	0.056*	0.046*	0.035*	0.033*	0.034*	0.039*	0.028*	0.024*	0.025*	0.016*	0.023*	0.021*	0.02*				0.045	0.059	0.034	0.04	0.039	0.058	0.053	0.042	0.044
61	0.044*	0.057*	0.033*	0.039*	0.038*	0.055*	0.054*	0.043*	0.042*	0.058*	0.027*	0.026*	0.046*	0.036*	0.028*	0.026*	0.046*	0.03*	0.036*	0.043*	0.036*	0.029*	0.045*	0.036*	0.056*	0.047*	0.035*	0.033*	0.033*	0.038*	0.028*	0.023*	0.025*	0.016*	0.024*	0.021*	0.018*				0.044	0.057	0.033	0.039	0.038	0.055	0.054	0.043	0.042
61.25	0.044*	0.057*	0.033*	0.038*	0.038*	0.056*	0.052*	0.042*	0.042*	0.058*	0.027*	0.025*	0.046*	0.037*	0.028*	0.026*	0.045*	0.029*	0.036*	0.044*	0.037*	0.028*	0.045*	0.035*	0.058*	0.046*	0.034*	0.033*	0.033*	0.039*	0.028*	0.023*	0.026*	0.015*	0.024*	0.023*	0.019*				0.044	0.057	0.033	0.038	0.038	0.056	0.052	0.042	0.042
61.5	0.043*	0.057*	0.033*	0.038*	0.038*	0.056*	0.049*	0.043*	0.043*	0.057*	0.026*	0.026*	0.044*	0.036*	0.028*	0.027*	0.043*	0.029*	0.035*	0.042*	0.036*	0.027*	0.045*	0.034*	0.058*	0.047*	0.034*	0.033*	0.032*	0.038*	0.028*	0.022*	0.025*	0.015*	0.022*	0.023*	0.019*				0.043	0.057	0.033	0.038	0.038	0.056	0.049	0.043	0.043
61.75	0.043*	0.053*	0.033*	0.037*	0.037*	0.055*	0.05*	0.043*	0.042*	0.057*	0.026*	0.026*	0.046*	0.036*	0.028*	0.027*	0.046*	0.028*	0.037*	0.041*	0.036*	0.027*	0.045*	0.035*	0.056*	0.049*	0.034*	0.033*	0.032*	0.036*	0.028*	0.022*	0.026*	0.015*	0.022*	0.021*	0.018*				0.043	0.053	0.033	0.037	0.037	0.055	0.05	0.043	0.042
62	0.042*	0.053*	0.034*	0.036*	0.037*	0.055*	0.051*	0.043*	0.043*	0.056*	0.025*	0.026*	0.044*	0.034*	0.027*	0.026*	0.044*	0.028*	0.035*	0.042*	0.037*	0.027*	0.046*	0.035*	0.062*	0.048*	0.034*	0.032*	0.033*	0.038*	0.028*	0.022*	0.027*	0.014*	0.022*	0.019*	0.018*				0.042	0.053	0.034	0.036	0.037	0.055	0.051	0.043	0.043
62.25	0.041*	0.056*	0.032*	0.036*	0.036*	0.056*	0.051*	0.042*	0.044*	0.058*	0.024*	0.026*	0.042*	0.033*	0.026*	0.025*	0.047*	0.027*	0.033*	0.042*	0.037*	0.026*	0.045*	0.035*	0.054*	0.046*	0.034*	0.034*	0.032*	0.037*	0.026*	0.022*	0.026*	0.014*	0.022*	0.02*	0.018*				0.041	0.056	0.032	0.036	0.036	0.056	0.051	0.042	0.044
62.5	0.043*	0.054*	0.032*	0.034*	0.036*	0.052*	0.051*	0.04*	0.044*	0.058*	0.024*	0.026*	0.043*	0.036*	0.026*	0.026*	0.047*	0.027*	0.034*	0.043*	0.037*	0.026*	0.044*	0.035*	0.056*	0.045*	0.032*	0.033*	0.033*	0.035*	0.025*	0.021*	0.025*	0.014*	0.022*	0.02*	0.018*				0.043	0.054	0.032	0.034	0.036	0.052	0.051	0.04	0.044
62.75	0.041*	0.051*	0.031*	0.035*	0.036*	0.051*	0.049*	0.039*	0.042*	0.056*	0.023*	0.025*	0.044*	0.035*	0.025*	0.025*	0.041*	0.028*	0.034*	0.044*	0.035*	0.025*	0.045*	0.035*	0.057*	0.045*	0.033*	0.032*	0.032*	0.034*	0.026*	0.021*	0.025*	0.015*	0.022*	0.019*	0.018*				0.041	0.051	0.031	0.035	0.036	0.051	0.049	0.039	0.042
63	0.041*	0.052*	0.033*	0.034*	0.035*	0.052*	0.05*	0.04*	0.041*	0.056*	0.023*	0.025*	0.044*	0.033*	0.025*	0.025*	0.042*	0.027*	0.033*	0.042*	0.037*	0.024*	0.043*	0.035*	0.052*	0.045*	0.034*	0.032*	0.032*	0.034*	0.027*	0.02*	0.024*	0.015*	0.022*	0.019*	0.018*				0.041	0.052	0.033	0.034	0.035	0.052	0.05	0.04	0.041
63.25	0.041*	0.049*	0.032*	0.034*	0.035*	0.053*	0.049*	0.04*	0.042*	0.057*	0.024*	0.024*	0.042*	0.034*	0.025*	0.026*	0.037*	0.026*	0.034*	0.042*	0.036*	0.024*	0.042*	0.035*	0.052*	0.044*	0.033*	0.031*	0.034*	0.036*	0.027*	0.02*	0.025*	0.014*	0.021*	0.018*	0.019*				0.041	0.049	0.032	0.034	0.035	0.053	0.049	0.04	0.042
63.5	0.04*	0.049*	0.031*	0.035*	0.034*	0.05*	0.049*	0.042*	0.041*	0.055*	0.024*	0.026*	0.043*	0.036*	0.025*	0.026*	0.042*	0.026*	0.033*	0.04*	0.034*	0.024*	0.041*	0.033*	0.052*	0.044*	0.033*	0.031*	0.032*	0.035*	0.026*	0.021*	0.024*	0.014*	0.021*	0.018*	0.018*				0.04	0.049	0.031	0.035	0.034	0.05	0.049	0.042	0.041
63.75	0.04*	0.05*	0.032*	0.035*	0.035*	0.05*	0.047*	0.04*	0.04*	0.056*	0.023*	0.024*	0.048*	0.034*	0.024*	0.025*	0.042*	0.025*	0.033*	0.04*	0.032*	0.024*	0.041*	0.034*	0.05*	0.043*	0.033*	0.031*	0.032*	0.033*	0.025*	0.02*	0.023*	0.014*	0.021*	0.019*	0.018*				0.04	0.05	0.032	0.035	0.035	0.05	0.047	0.04	0.04
64	0.04*	0.051*	0.029*	0.032*	0.035*	0.05*	0.046*	0.038*	0.038*	0.054*	0.024*	0.023*	0.043*	0.034*	0.024*	0.025*	0.041*	0.024*	0.033*	0.039*	0.034*	0.025*	0.04*	0.033*	0.05*	0.044*	0.032*	0.031*	0.031*	0.033*	0.025*	0.02*	0.023*	0.014*	0.021*	0.017*	0.017*				0.04	0.051	0.029	0.032	0.035	0.05	0.046	0.038	0.038
64.25	0.039*	0.05*	0.031*	0.033*	0.034*	0.048*	0.049*	0.037*	0.038*	0.052*	0.023*	0.024*	0.041*	0.035*	0.024*	0.025*	0.041*	0.025*	0.032*	0.038*	0.034*	0.025*	0.04*	0.033*	0.051*	0.044*	0.031*	0.031*	0.032*	0.034*	0.025*	0.02*	0.023*	0.013*	0.019*	0.018*	0.017*				0.039	0.05	0.031	0.033	0.034	0.048	0.049	0.037	0.038
64.5	0.038*	0.049*	0.03*	0.031*	0.033*	0.05*	0.048*	0.038*	0.038*	0.054*	0.023*	0.023*	0.039*	0.033*	0.024*	0.024*	0.039*	0.025*	0.032*	0.038*	0.034*	0.024*	0.041*	0.033*	0.051*	0.044*	0.032*	0.031*	0.032*	0.033*	0.025*	0.02*	0.022*	0.013*	0.02*	0.017*	0.017*				0.038	0.049	0.03	0.031	0.033	0.05	0.048	0.038	0.038
64.75	0.037*	0.05*	0.029*	0.03*	0.033*	0.05*	0.045*	0.039*	0.037*	0.053*	0.022*	0.023*	0.039*	0.035*	0.024*	0.025*	0.041*	0.025*	0.032*	0.039*	0.034*	0.023*	0.041*	0.032*	0.05*	0.043*	0.031*	0.031*	0.03*	0.033*	0.025*	0.02*	0.022*	0.014*	0.019*	0.017*	0.016*				0.037	0.05	0.029	0.03	0.033	0.05	0.045	0.039	0.037
65	0.036*	0.049*	0.03*	0.031*	0.033*	0.049*	0.046*	0.04*	0.038*	0.053*	0.022*	0.023*	0.038*	0.034*	0.023*	0.024*	0.043*	0.024*	0.033*	0.038*	0.033*	0.023*	0.039*	0.032*	0.052*	0.042*	0.031*	0.032*	0.031*	0.032*	0.024*	0.019*	0.022*	0.013*	0.019*	0.017*	0.015*				0.036	0.049	0.03	0.031	0.033	0.049	0.046	0.04	0.038
65.25	0.036*	0.047*	0.03*	0.032*	0.034*	0.048*	0.047*	0.039*	0.035*	0.053*	0.021*	0.023*	0.037*	0.032*	0.023*	0.022*	0.043*	0.025*	0.032*	0.037*	0.033*	0.023*	0.039*	0.031*	0.047*	0.042*	0.031*	0.031*	0.031*	0.033*	0.024*	0.019*	0.021*	0.013*	0.018*	0.018*	0.016*				0.036	0.047	0.03	0.032	0.034	0.048	0.047	0.039	0.035
65.5	0.037*	0.046*	0.031*	0.031*	0.034*	0.047*	0.046*	0.038*	0.035*	0.051*	0.019*	0.024*	0.037*	0.033*	0.023*	0.023*	0.041*	0.023*	0.03*	0.038*	0.03*	0.022*	0.038*	0.031*	0.049*	0.042*	0.031*	0.03*	0.031*	0.033*	0.023*	0.019*	0.022*	0.013*	0.02*	0.016*	0.016*				0.037	0.046	0.031	0.031	0.034	0.047	0.046	0.038	0.035
65.75	0.036*	0.046*	0.029*	0.028*	0.033*	0.046*	0.045*	0.036*	0.035*	0.051*	0.021*	0.023*	0.037*	0.032*	0.022*	0.023*	0.038*	0.023*	0.031*	0.038*	0.03*	0.022*	0.037*	0.031*	0.051*	0.04*	0.03*	0.03*	0.03*	0.032*	0.023*	0.019*	0.023*	0.013*	0.019*	0.016*	0.015*				0.036	0.046	0.029	0.028	0.033	0.046	0.045	0.036	0.035
66	0.035*	0.044*	0.029*	0.028*	0.032*	0.044*	0.044*	0.035*	0.034*	0.05*	0.021*	0.022*	0.037*	0.031*	0.022*	0.022*	0.041*	0.023*	0.03*	0.036*	0.031*	0.022*	0.038*	0.031*	0.047*	0.04*	0.03*	0.029*	0.029*	0.03*	0.023*	0.018*	0.021*	0.013*	0.019*	0.017*	0.013*				0.035	0.044	0.029	0.028	0.032	0.044	0.044	0.035	0.034
66.25	0.036*	0.044*	0.027*	0.028*	0.031*	0.044*	0.043*	0.034*	0.035*	0.049*	0.02*	0.021*	0.037*	0.029*	0.022*	0.021*	0.039*	0.022*	0.029*	0.036*	0.032*	0.021*	0.038*	0.031*	0.046*	0.04*	0.03*	0.029*	0.029*	0.029*	0.022*	0.018*	0.021*	0.013*	0.019*	0.016*	0.014*				0.036	0.044	0.027	0.028	0.031	0.044	0.043	0.034	0.035
66.5	0.035*	0.043*	0.027*	0.028*	0.03*	0.044*	0.043*	0.034*	0.035*	0.051*	0.02*	0.021*	0.037*	0.03*	0.021*	0.022*	0.04*	0.022*	0.03*	0.035*	0.031*	0.021*	0.038*	0.031*	0.046*	0.039*	0.03*	0.029*	0.029*	0.031*	0.023*	0.017*	0.02*	0.012*	0.019*	0.016*	0.014*				0.035	0.043	0.027	0.028	0.03	0.044	0.043	0.034	0.035
66.75	0.032*	0.043*	0.028*	0.028*	0.031*	0.042*	0.043*	0.034*	0.034*	0.051*	0.019*	0.021*	0.037*	0.03*	0.021*	0.022*	0.036*	0.022*	0.03*	0.033*	0.029*	0.021*	0.037*	0.03*	0.046*	0.039*	0.03*	0.029*	0.029*	0.032*	0.022*	0.017*	0.021*	0.012*	0.018*	0.015*	0.015*				0.032	0.043	0.028	0.028	0.031	0.042	0.043	0.034	0.034
67	0.032*	0.042*	0.028*	0.027*	0.031*	0.044*	0.042*	0.034*	0.034*	0.049*	0.02*	0.02*	0.036*	0.029*	0.02*	0.022*	0.037*	0.022*	0.029*	0.034*	0.029*	0.021*	0.037*	0.03*	0.046*	0.039*	0.029*	0.029*	0.03*	0.032*	0.021*	0.017*	0.02*	0.012*	0.017*	0.016*	0.014*				0.032	0.042	0.028	0.027	0.031	0.044	0.042	0.034	0.034
67.25	0.032*	0.042*	0.026*	0.026*	0.03*	0.043*	0.043*	0.032*	0.032*	0.047*	0.02*	0.021*	0.035*	0.029*	0.02*	0.022*	0.04*	0.022*	0.028*	0.034*	0.029*	0.02*	0.034*	0.03*	0.046*	0.038*	0.028*	0.028*	0.029*	0.028*	0.021*	0.018*	0.019*	0.012*	0.018*	0.017*	0.014*				0.032	0.042	0.026	0.026	0.03	0.043	0.043	0.032	0.032
67.5	0.031*	0.042*	0.028*	0.025*	0.029*	0.042*	0.04*	0.034*	0.032*	0.047*	0.02*	0.022*	0.036*	0.03*	0.02*	0.021*	0.036*	0.022*	0.029*	0.034*	0.029*	0.02*	0.035*	0.03*	0.046*	0.037*	0.029*	0.028*	0.027*	0.028*	0.02*	0.017*	0.02*	0.012*	0.018*	0.016*	0.014*				0.031	0.042	0.028	0.025	0.029	0.042	0.04	0.034	0.032
67.75	0.032*	0.04*	0.027*	0.025*	0.029*	0.041*	0.04*	0.033*	0.031*	0.048*	0.019*	0.022*	0.032*	0.03*	0.019*	0.021*	0.036*	0.021*	0.028*	0.033*	0.03*	0.02*	0.035*	0.029*	0.043*	0.037*	0.028*	0.028*	0.028*	0.029*	0.02*	0.017*	0.02*	0.012*	0.018*	0.016*	0.014*				0.032	0.04	0.027	0.025	0.029	0.041	0.04	0.033	0.031
68	0.031*	0.04*	0.025*	0.025*	0.029*	0.04*	0.04*	0.031*	0.032*	0.047*	0.019*	0.021*	0.033*	0.029*	0.019*	0.021*	0.04*	0.021*	0.027*	0.033*	0.027*	0.019*	0.032*	0.029*	0.043*	0.036*	0.027*	0.027*	0.027*	0.028*	0.02*	0.016*	0.02*	0.012*	0.017*	0.016*	0.014*				0.031	0.04	0.025	0.025	0.029	0.04	0.04	0.031	0.032
68.25	0.03*	0.04*	0.024*	0.024*	0.029*	0.039*	0.038*	0.032*	0.03*	0.046*	0.021*	0.02*	0.035*	0.027*	0.019*	0.02*	0.034*	0.021*	0.027*	0.033*	0.027*	0.018*	0.034*	0.029*	0.043*	0.034*	0.028*	0.027*	0.027*	0.028*	0.021*	0.016*	0.019*	0.012*	0.017*	0.015*	0.014*				0.03	0.04	0.024	0.024	0.029	0.039	0.038	0.032	0.03
68.5	0.031*	0.038*	0.024*	0.024*	0.028*	0.04*	0.037*	0.031*	0.031*	0.047*	0.019*	0.021*	0.034*	0.027*	0.019*	0.02*	0.032*	0.02*	0.027*	0.034*	0.027*	0.018*	0.035*	0.028*	0.042*	0.034*	0.028*	0.026*	0.027*	0.028*	0.02*	0.016*	0.018*	0.012*	0.017*	0.015*	0.014*				0.031	0.038	0.024	0.024	0.028	0.04	0.037	0.031	0.031
68.75	0.031*	0.037*	0.024*	0.023*	0.027*	0.041*	0.036*	0.031*	0.03*	0.047*	0.017*	0.02*	0.033*	0.027*	0.018*	0.02*	0.035*	0.021*	0.026*	0.033*	0.027*	0.018*	0.033*	0.028*	0.043*	0.035*	0.027*	0.026*	0.026*	0.027*	0.021*	0.016*	0.018*	0.011*	0.016*	0.014*	0.014*				0.031	0.037	0.024	0.023	0.027	0.041	0.036	0.031	0.03
69	0.03*	0.038*	0.024*	0.022*	0.026*	0.039*	0.037*	0.029*	0.03*	0.045*	0.017*	0.019*	0.033*	0.025*	0.018*	0.021*	0.03*	0.021*	0.026*	0.032*	0.026*	0.018*	0.032*	0.027*	0.045*	0.034*	0.026*	0.028*	0.026*	0.028*	0.02*	0.015*	0.018*	0.011*	0.016*	0.014*	0.013*				0.03	0.038	0.024	0.022	0.026	0.039	0.037	0.029	0.03
69.25	0.028*	0.037*	0.026*	0.022*	0.026*	0.037*	0.036*	0.029*	0.03*	0.045*	0.017*	0.019*	0.032*	0.027*	0.017*	0.021*	0.032*	0.021*	0.026*	0.031*	0.026*	0.017*	0.032*	0.027*	0.044*	0.034*	0.026*	0.027*	0.026*	0.028*	0.019*	0.015*	0.018*	0.011*	0.016*	0.014*	0.014*				0.028	0.037	0.026	0.022	0.026	0.037	0.036	0.029	0.03
69.5	0.028*	0.037*	0.025*	0.023*	0.026*	0.036*	0.036*	0.028*	0.029*	0.045*	0.017*	0.019*	0.033*	0.026*	0.017*	0.02*	0.035*	0.019*	0.026*	0.032*	0.026*	0.017*	0.032*	0.027*	0.043*	0.033*	0.025*	0.026*	0.025*	0.026*	0.019*	0.015*	0.017*	0.01*	0.015*	0.014*	0.013*				0.028	0.037	0.025	0.023	0.026	0.036	0.036	0.028	0.029
69.75	0.028*	0.035*	0.025*	0.023*	0.025*	0.036*	0.035*	0.028*	0.028*	0.044*	0.017*	0.019*	0.031*	0.024*	0.017*	0.019*	0.029*	0.019*	0.024*	0.031*	0.027*	0.018*	0.032*	0.027*	0.041*	0.033*	0.025*	0.026*	0.025*	0.027*	0.018*	0.015*	0.017*	0.01*	0.015*	0.014*	0.013*				0.028	0.035	0.025	0.023	0.025	0.036	0.035	0.028	0.028
70	0.028*	0.034*	0.025*	0.023*	0.025*	0.036*	0.034*	0.029*	0.029*	0.042*	0.017*	0.018*	0.032*	0.025*	0.017*	0.019*	0.03*	0.018*	0.025*	0.029*	0.026*	0.016*	0.031*	0.026*	0.04*	0.034*	0.025*	0.025*	0.025*	0.026*	0.018*	0.015*	0.017*	0.01*	0.015*	0.014*	0.012*				0.028	0.034	0.025	0.023	0.025	0.036	0.034	0.029	0.029
70.25	0.027*	0.034*	0.023*	0.021*	0.025*	0.037*	0.035*	0.027*	0.028*	0.044*	0.016*	0.018*	0.032*	0.026*	0.016*	0.018*	0.03*	0.017*	0.024*	0.028*	0.024*	0.017*	0.03*	0.026*	0.042*	0.034*	0.024*	0.025*	0.025*	0.026*	0.018*	0.014*	0.016*	0.011*	0.016*	0.014*	0.012*				0.027	0.034	0.023	0.021	0.025	0.037	0.035	0.027	0.028
70.5	0.026*	0.035*	0.024*	0.021*	0.024*	0.037*	0.035*	0.027*	0.025*	0.044*	0.017*	0.019*	0.033*	0.025*	0.016*	0.018*	0.026*	0.018*	0.024*	0.03*	0.025*	0.016*	0.028*	0.026*	0.042*	0.033*	0.024*	0.025*	0.025*	0.024*	0.018*	0.014*	0.016*	0.01*	0.015*	0.014*	0.013*				0.026	0.035	0.024	0.021	0.024	0.037	0.035	0.027	0.025
70.75	0.026*	0.034*	0.021*	0.021*	0.024*	0.035*	0.034*	0.027*	0.027*	0.042*	0.016*	0.018*	0.037*	0.025*	0.016*	0.019*	0.03*	0.019*	0.025*	0.028*	0.023*	0.016*	0.028*	0.025*	0.037*	0.031*	0.023*	0.024*	0.025*	0.024*	0.018*	0.014*	0.016*	0.01*	0.015*	0.012*	0.012*				0.026	0.034	0.021	0.021	0.024	0.035	0.034	0.027	0.027
71	0.026*	0.033*	0.021*	0.02*	0.024*	0.035*	0.033*	0.027*	0.026*	0.042*	0.015*	0.017*	0.051*	0.024*	0.016*	0.018*	0.031*	0.018*	0.025*	0.028*	0.024*	0.016*	0.028*	0.024*	0.037*	0.031*	0.024*	0.025*	0.025*	0.024*	0.017*	0.014*	0.017*	0.01*	0.014*	0.012*	0.012*				0.026	0.033	0.021	0.02	0.024	0.035	0.033	0.027	0.026
71.25	0.026*	0.034*	0.023*	0.019*	0.024*	0.034*	0.034*	0.026*	0.026*	0.041*	0.016*	0.017*	0.038*	0.024*	0.016*	0.018*	0.029*	0.018*	0.024*	0.028*	0.023*	0.015*	0.028*	0.024*	0.038*	0.03*	0.024*	0.024*	0.023*	0.024*	0.016*	0.014*	0.017*	0.01*	0.014*	0.012*	0.012*				0.026	0.034	0.023	0.019	0.024	0.034	0.034	0.026	0.026
71.5	0.025*	0.033*	0.022*	0.018*	0.023*	0.033*	0.033*	0.026*	0.025*	0.041*	0.016*	0.017*	0.034*	0.022*	0.016*	0.018*	0.029*	0.018*	0.023*	0.027*	0.022*	0.015*	0.027*	0.025*	0.037*	0.031*	0.023*	0.023*	0.023*	0.024*	0.016*	0.013*	0.016*	0.01*	0.015*	0.012*	0.013*				0.025	0.033	0.022	0.018	0.023	0.033	0.033	0.026	0.025
71.75	0.025*	0.032*	0.022*	0.018*	0.022*	0.031*	0.032*	0.025*	0.025*	0.04*	0.015*	0.018*	0.032*	0.022*	0.015*	0.018*	0.027*	0.017*	0.022*	0.027*	0.023*	0.015*	0.028*	0.025*	0.039*	0.031*	0.022*	0.023*	0.023*	0.024*	0.016*	0.013*	0.015*	0.01*	0.014*	0.013*	0.012*				0.025	0.032	0.022	0.018	0.022	0.031	0.032	0.025	0.025
72	0.024*	0.029*	0.019*	0.018*	0.022*	0.032*	0.031*	0.024*	0.025*	0.039*	0.015*	0.017*	0.031*	0.023*	0.014*	0.018*	0.026*	0.017*	0.022*	0.026*	0.022*	0.015*	0.027*	0.024*	0.037*	0.031*	0.022*	0.023*	0.022*	0.024*	0.016*	0.013*	0.014*	0.009*	0.013*	0.012*	0.011*				0.024	0.029	0.019	0.018	0.022	0.032	0.031	0.024	0.025
72.25	0.023*	0.029*	0.019*	0.018*	0.022*	0.031*	0.03*	0.024*	0.024*	0.038*	0.015*	0.017*	0.03*	0.023*	0.014*	0.017*	0.028*	0.018*	0.022*	0.026*	0.022*	0.014*	0.026*	0.024*	0.036*	0.031*	0.021*	0.022*	0.022*	0.023*	0.016*	0.013*	0.014*	0.009*	0.014*	0.012*	0.011*				0.023	0.029	0.019	0.018	0.022	0.031	0.03	0.024	0.024
72.5	0.023*	0.03*	0.02*	0.018*	0.021*	0.03*	0.03*	0.024*	0.023*	0.039*	0.015*	0.017*	0.032*	0.023*	0.014*	0.017*	0.025*	0.017*	0.022*	0.026*	0.022*	0.014*	0.026*	0.022*	0.035*	0.03*	0.021*	0.022*	0.022*	0.023*	0.016*	0.012*	0.014*	0.009*	0.013*	0.012*	0.011*				0.023	0.03	0.02	0.018	0.021	0.03	0.03	0.024	0.023
72.75	0.023*	0.03*	0.019*	0.017*	0.021*	0.03*	0.029*	0.023*	0.023*	0.038*	0.014*	0.016*	0.038*	0.022*	0.014*	0.017*	0.025*	0.017*	0.021*	0.025*	0.023*	0.014*	0.026*	0.022*	0.033*	0.029*	0.021*	0.022*	0.021*	0.022*	0.015*	0.013*	0.014*	0.009*	0.013*	0.012*	0.011*				0.023	0.03	0.019	0.017	0.021	0.03	0.029	0.023	0.023
73	0.023*	0.029*	0.021*	0.017*	0.02*	0.03*	0.029*	0.023*	0.023*	0.037*	0.013*	0.016*	0.033*	0.022*	0.014*	0.017*	0.028*	0.016*	0.021*	0.024*	0.022*	0.014*	0.025*	0.021*	0.034*	0.028*	0.021*	0.022*	0.021*	0.021*	0.015*	0.012*	0.013*	0.009*	0.013*	0.012*	0.011*				0.023	0.029	0.021	0.017	0.02	0.03	0.029	0.023	0.023
73.25	0.022*	0.029*	0.019*	0.016*	0.021*	0.03*	0.028*	0.023*	0.022*	0.037*	0.013*	0.016*	0.03*	0.022*	0.014*	0.017*	0.029*	0.015*	0.021*	0.024*	0.022*	0.013*	0.025*	0.021*	0.033*	0.028*	0.021*	0.021*	0.021*	0.021*	0.015*	0.012*	0.013*	0.009*	0.013*	0.011*	0.011*				0.022	0.029	0.019	0.016	0.021	0.03	0.028	0.023	0.022
73.5	0.022*	0.029*	0.02*	0.016*	0.019*	0.028*	0.027*	0.023*	0.021*	0.037*	0.013*	0.016*	0.029*	0.021*	0.013*	0.016*	0.027*	0.016*	0.02*	0.023*	0.02*	0.013*	0.025*	0.021*	0.034*	0.029*	0.02*	0.021*	0.021*	0.021*	0.015*	0.011*	0.013*	0.009*	0.012*	0.011*	0.01*				0.022	0.029	0.02	0.016	0.019	0.028	0.027	0.023	0.021
73.75	0.021*	0.028*	0.02*	0.016*	0.019*	0.028*	0.027*	0.022*	0.021*	0.034*	0.013*	0.015*	0.029*	0.02*	0.013*	0.017*	0.026*	0.015*	0.021*	0.023*	0.021*	0.013*	0.023*	0.021*	0.035*	0.027*	0.02*	0.021*	0.021*	0.022*	0.014*	0.011*	0.013*	0.008*	0.011*	0.01*	0.01*				0.021	0.028	0.02	0.016	0.019	0.028	0.027	0.022	0.021
74	0.02*	0.028*	0.02*	0.015*	0.019*	0.028*	0.028*	0.021*	0.02*	0.034*	0.014*	0.015*	0.028*	0.02*	0.013*	0.017*	0.024*	0.015*	0.021*	0.024*	0.02*	0.013*	0.023*	0.021*	0.032*	0.027*	0.02*	0.02*	0.02*	0.022*	0.014*	0.011*	0.013*	0.008*	0.012*	0.01*	0.01*				0.02	0.028	0.02	0.015	0.019	0.028	0.028	0.021	0.02
74.25	0.02*	0.028*	0.02*	0.016*	0.019*	0.027*	0.027*	0.02*	0.021*	0.034*	0.012*	0.015*	0.029*	0.02*	0.012*	0.016*	0.025*	0.014*	0.02*	0.023*	0.019*	0.013*	0.023*	0.021*	0.031*	0.027*	0.019*	0.019*	0.02*	0.021*	0.014*	0.011*	0.013*	0.008*	0.012*	0.01*	0.009*				0.02	0.028	0.02	0.016	0.019	0.027	0.027	0.02	0.021
74.5	0.02*	0.027*	0.019*	0.015*	0.019*	0.026*	0.026*	0.02*	0.02*	0.033*	0.012*	0.014*	0.029*	0.021*	0.013*	0.015*	0.025*	0.014*	0.019*	0.022*	0.019*	0.012*	0.024*	0.02*	0.031*	0.026*	0.019*	0.019*	0.019*	0.02*	0.013*	0.012*	0.012*	0.008*	0.012*	0.011*	0.009*				0.02	0.027	0.019	0.015	0.019	0.026	0.026	0.02	0.02
74.75	0.02*	0.026*	0.019*	0.015*	0.018*	0.025*	0.025*	0.02*	0.02*	0.033*	0.014*	0.014*	0.027*	0.021*	0.012*	0.015*	0.023*	0.014*	0.018*	0.021*	0.019*	0.012*	0.022*	0.02*	0.03*	0.026*	0.018*	0.019*	0.019*	0.019*	0.013*	0.011*	0.012*	0.008*	0.012*	0.01*	0.009*				0.02	0.026	0.019	0.015	0.018	0.025	0.025	0.02	0.02
75	0.019*	0.026*	0.018*	0.015*	0.017*	0.025*	0.026*	0.02*	0.02*	0.033*	0.012*	0.014*	0.026*	0.019*	0.012*	0.015*	0.025*	0.014*	0.018*	0.022*	0.019*	0.012*	0.022*	0.019*	0.029*	0.025*	0.018*	0.018*	0.019*	0.02*	0.013*	0.011*	0.012*	0.008*	0.012*	0.01*	0.009*				0.019	0.026	0.018	0.015	0.017	0.025	0.026	0.02	0.02
75.25	0.019*	0.026*	0.019*	0.015*	0.017*	0.025*	0.025*	0.019*	0.019*	0.031*	0.012*	0.015*	0.026*	0.019*	0.012*	0.015*	0.024*	0.014*	0.018*	0.021*	0.018*	0.012*	0.021*	0.02*	0.029*	0.025*	0.018*	0.018*	0.019*	0.019*	0.013*	0.011*	0.012*	0.008*	0.011*	0.01*	0.009*				0.019	0.026	0.019	0.015	0.017	0.025	0.025	0.019	0.019
75.5	0.019*	0.024*	0.018*	0.014*	0.017*	0.024*	0.025*	0.019*	0.019*	0.03*	0.013*	0.015*	0.026*	0.022*	0.011*	0.015*	0.022*	0.014*	0.019*	0.021*	0.018*	0.012*	0.021*	0.019*	0.029*	0.024*	0.017*	0.018*	0.018*	0.018*	0.012*	0.01*	0.012*	0.008*	0.011*	0.01*	0.009*				0.019	0.024	0.018	0.014	0.017	0.024	0.025	0.019	0.019
75.75	0.019*	0.024*	0.016*	0.014*	0.017*	0.023*	0.024*	0.019*	0.019*	0.031*	0.012*	0.014*	0.026*	0.019*	0.011*	0.015*	0.021*	0.014*	0.018*	0.021*	0.017*	0.011*	0.02*	0.019*	0.03*	0.024*	0.017*	0.017*	0.018*	0.018*	0.012*	0.01*	0.011*	0.007*	0.011*	0.009*	0.009*				0.019	0.024	0.016	0.014	0.017	0.023	0.024	0.019	0.019
76	0.018*	0.024*	0.017*	0.014*	0.017*	0.024*	0.023*	0.017*	0.018*	0.03*	0.012*	0.014*	0.026*	0.017*	0.011*	0.014*	0.02*	0.014*	0.018*	0.02*	0.018*	0.011*	0.02*	0.019*	0.03*	0.023*	0.017*	0.016*	0.018*	0.017*	0.012*	0.01*	0.011*	0.007*	0.01*	0.01*	0.009*				0.018	0.024	0.017	0.014	0.017	0.024	0.023	0.017	0.018
76.25	0.018*	0.023*	0.017*	0.013*	0.016*	0.024*	0.023*	0.017*	0.018*	0.029*	0.011*	0.013*	0.026*	0.016*	0.011*	0.014*	0.021*	0.013*	0.017*	0.02*	0.017*	0.011*	0.02*	0.018*	0.028*	0.023*	0.017*	0.016*	0.017*	0.017*	0.012*	0.009*	0.011*	0.007*	0.01*	0.009*	0.009*				0.018	0.023	0.017	0.013	0.016	0.024	0.023	0.017	0.018
76.5	0.017*	0.023*	0.016*	0.014*	0.016*	0.023*	0.023*	0.017*	0.017*	0.029*	0.011*	0.013*	0.026*	0.018*	0.01*	0.014*	0.021*	0.013*	0.017*	0.019*	0.017*	0.01*	0.019*	0.018*	0.029*	0.022*	0.016*	0.016*	0.017*	0.017*	0.012*	0.009*	0.011*	0.007*	0.01*	0.01*	0.009*				0.017	0.023	0.016	0.014	0.016	0.023	0.023	0.017	0.017
76.75	0.016*	0.024*	0.017*	0.013*	0.016*	0.021*	0.023*	0.017*	0.017*	0.027*	0.011*	0.014*	0.024*	0.018*	0.01*	0.014*	0.02*	0.012*	0.017*	0.019*	0.018*	0.01*	0.02*	0.018*	0.027*	0.021*	0.016*	0.015*	0.017*	0.018*	0.012*	0.009*	0.01*	0.007*	0.01*	0.009*	0.009*				0.016	0.024	0.017	0.013	0.016	0.021	0.023	0.017	0.017
77	0.016*	0.024*	0.016*	0.013*	0.015*	0.022*	0.023*	0.018*	0.016*	0.027*	0.011*	0.013*	0.024*	0.017*	0.011*	0.014*	0.021*	0.012*	0.016*	0.019*	0.017*	0.01*	0.019*	0.017*	0.026*	0.022*	0.016*	0.015*	0.017*	0.018*	0.011*	0.009*	0.01*	0.007*	0.01*	0.009*	0.008*				0.016	0.024	0.016	0.013	0.015	0.022	0.023	0.018	0.016
77.25	0.016*	0.023*	0.015*	0.013*	0.015*	0.021*	0.021*	0.017*	0.016*	0.027*	0.011*	0.012*	0.025*	0.019*	0.01*	0.013*	0.021*	0.012*	0.016*	0.019*	0.017*	0.01*	0.018*	0.017*	0.027*	0.022*	0.016*	0.015*	0.015*	0.017*	0.011*	0.009*	0.01*	0.007*	0.01*	0.009*	0.008*				0.016	0.023	0.015	0.013	0.015	0.021	0.021	0.017	0.016
77.5	0.016*	0.022*	0.014*	0.012*	0.014*	0.02*	0.021*	0.016*	0.016*	0.026*	0.011*	0.012*	0.025*	0.018*	0.01*	0.012*	0.018*	0.012*	0.016*	0.019*	0.015*	0.01*	0.018*	0.017*	0.026*	0.022*	0.015*	0.014*	0.015*	0.016*	0.011*	0.009*	0.011*	0.007*	0.01*	0.009*	0.008*				0.016	0.022	0.014	0.012	0.014	0.02	0.021	0.016	0.016
77.75	0.015*	0.02*	0.016*	0.012*	0.014*	0.02*	0.021*	0.015*	0.015*	0.026*	0.01*	0.013*	0.024*	0.017*	0.01*	0.012*	0.019*	0.012*	0.015*	0.019*	0.015*	0.01*	0.017*	0.016*	0.025*	0.021*	0.014*	0.014*	0.015*	0.016*	0.01*	0.009*	0.01*	0.007*	0.009*	0.008*	0.008*				0.015	0.02	0.016	0.012	0.014	0.02	0.021	0.015	0.015
78	0.015*	0.02*	0.015*	0.012*	0.014*	0.02*	0.02*	0.015*	0.015*	0.026*	0.01*	0.013*	0.025*	0.018*	0.009*	0.013*	0.019*	0.011*	0.015*	0.017*	0.015*	0.009*	0.016*	0.016*	0.024*	0.02*	0.014*	0.014*	0.015*	0.016*	0.01*	0.008*	0.01*	0.007*	0.01*	0.008*	0.008*				0.015	0.02	0.015	0.012	0.014	0.02	0.02	0.015	0.015
78.25	0.015*	0.02*	0.015*	0.012*	0.014*	0.019*	0.02*	0.015*	0.014*	0.026*	0.01*	0.012*	0.024*	0.016*	0.009*	0.012*	0.018*	0.012*	0.015*	0.017*	0.016*	0.009*	0.017*	0.015*	0.023*	0.019*	0.014*	0.013*	0.015*	0.015*	0.01*	0.008*	0.009*	0.006*	0.009*	0.008*	0.008*				0.015	0.02	0.015	0.012	0.014	0.019	0.02	0.015	0.014
78.5	0.014*	0.02*	0.014*	0.011*	0.013*	0.019*	0.019*	0.015*	0.014*	0.024*	0.01*	0.013*	0.023*	0.018*	0.009*	0.012*	0.017*	0.012*	0.015*	0.016*	0.014*	0.009*	0.016*	0.015*	0.023*	0.019*	0.014*	0.013*	0.014*	0.015*	0.01*	0.008*	0.009*	0.006*	0.009*	0.007*	0.007*				0.014	0.02	0.014	0.011	0.013	0.019	0.019	0.015	0.014
78.75	0.014*	0.02*	0.014*	0.011*	0.013*	0.018*	0.018*	0.014*	0.014*	0.024*	0.01*	0.012*	0.023*	0.016*	0.009*	0.011*	0.017*	0.011*	0.014*	0.016*	0.014*	0.009*	0.015*	0.015*	0.021*	0.02*	0.013*	0.013*	0.014*	0.015*	0.009*	0.008*	0.009*	0.006*	0.009*	0.007*	0.007*				0.014	0.02	0.014	0.011	0.013	0.018	0.018	0.014	0.014
79	0.014*	0.019*	0.014*	0.011*	0.012*	0.018*	0.018*	0.014*	0.014*	0.023*	0.009*	0.011*	0.022*	0.015*	0.009*	0.011*	0.018*	0.011*	0.014*	0.016*	0.014*	0.009*	0.016*	0.015*	0.021*	0.02*	0.013*	0.012*	0.013*	0.015*	0.009*	0.008*	0.008*	0.006*	0.008*	0.008*	0.007*				0.014	0.019	0.014	0.011	0.012	0.018	0.018	0.014	0.014
79.25	0.013*	0.017*	0.014*	0.01*	0.012*	0.018*	0.018*	0.014*	0.014*	0.022*	0.009*	0.011*	0.022*	0.014*	0.008*	0.011*	0.016*	0.01*	0.013*	0.016*	0.014*	0.009*	0.015*	0.014*	0.021*	0.019*	0.013*	0.012*	0.014*	0.014*	0.009*	0.008*	0.008*	0.006*	0.008*	0.007*	0.007*				0.013	0.017	0.014	0.01	0.012	0.018	0.018	0.014	0.014
79.5	0.013*	0.017*	0.013*	0.01*	0.012*	0.017*	0.017*	0.014*	0.013*	0.022*	0.009*	0.011*	0.022*	0.014*	0.008*	0.011*	0.017*	0.01*	0.013*	0.015*	0.013*	0.008*	0.014*	0.014*	0.021*	0.018*	0.012*	0.012*	0.013*	0.014*	0.009*	0.008*	0.008*	0.006*	0.008*	0.007*	0.007*				0.013	0.017	0.013	0.01	0.012	0.017	0.017	0.014	0.013
79.75	0.013*	0.016*	0.015*	0.011*	0.012*	0.017*	0.018*	0.013*	0.013*	0.022*	0.01*	0.012*	0.02*	0.014*	0.008*	0.011*	0.018*	0.01*	0.013*	0.015*	0.016*	0.008*	0.015*	0.013*	0.023*	0.017*	0.012*	0.01*	0.012*	0.016*	0.009*	0.007*	0.008*	0.006*	0.009*	0.007*	0.007*				0.013	0.016	0.015	0.011	0.012	0.017	0.018	0.013	0.013
80	0.018*	0.022*	0.025*	0.013*	0.016*	0.024*	0.023*	0.016*	0.017*	0.027*	0.012*	0.017*	0.025*	0.017*	0.011*	0.014*	0.025*	0.013*	0.017*	0.02*	0.016*	0.01*	0.021*	0.02*	0.029*	0.022*	0.014*	0.013*	0.016*	0.024*	0.011*	0.01*	0.01*	0.007*	0.011*	0.008*	0.009*				0.018	0.022	0.025	0.013	0.016	0.024	0.023	0.016	0.017
[truncated: 28 more columns]
