# Supplementary material for: Cold-inducible RNA-binding protein (CIRBP) adjusts clock-gene expression and REM-sleep recovery following sleep deprivation
Source: eLife. 2019 Feb 5;8:e43400. doi: 10.7554/eLife.43400 (PMC6379088; doi:10.7554/eLife.43400)
Supplement: Figure 6—figure supplement 2—source data 1. [file elife-43400-fig6-figsupp2-data1.xlsx]

## Sheet: SlowGamma
Accumulated power (mean+/-SEM) in the slow gamma band during TDW across the experiment.
Data are based on interval calculations (see Material and Methods)
	WT				KO
	Time(mean)	Time(SEM)	FastGamma(mean)	FastGamma(SEM)	Time(mean)	Time(SEM)	FastGamma(mean)	FastGamma(SEM)
	1.7307	0.265736	0.276975	0.0115388	1.26589	0.30518	0.227019	0.00708535
	3.64458	0.359371	0.280155	0.00827283	3.28492	0.349951	0.231162	0.00865525
	4.90308	0.372071	0.276795	0.0120498	4.77685	0.367586	0.226394	0.00668955
	7.00558	0.346591	0.275165	0.00889645	6.73715	0.554528	0.242275	0.0125686
	9.35113	0.317742	0.282595	0.00754982	8.79551	0.493272	0.22245	0.00645109
	11.2438	0.114582	0.277125	0.00805928	11.1871	0.152426	0.235462	0.00835669
	12.4109	0.0484527	0.280265	0.00794144	12.3484	0.0490601	0.248575	0.00819145
	13.1511	0.110474	0.28121	0.00782644	12.9489	0.101071	0.234387	0.0075862
	14.0808	0.130032	0.2751	0.0074911	13.7701	0.151992	0.233619	0.00878698
	15.0783	0.175414	0.27106	0.00768304	14.6648	0.203298	0.2408	0.0102134
	15.965	0.20388	0.265985	0.00759176	15.5644	0.232102	0.23525	0.00817157
	16.7327	0.172449	0.272685	0.00747855	16.4663	0.263403	0.232187	0.00953449
	17.6455	0.15642	0.269655	0.00753559	17.2797	0.286878	0.2285	0.00892396
	18.8456	0.227062	0.268635	0.00682366	18.3799	0.355079	0.226681	0.00884836
	20.0294	0.281067	0.265185	0.00747682	19.7048	0.38602	0.230181	0.00991278
	21.4243	0.247578	0.271205	0.00837603	21.2633	0.356702	0.23895	0.0126213
	22.4834	0.174474	0.272025	0.0093222	22.5422	0.179455	0.2313	0.00971537
	23.3673	0.0772882	0.271505	0.00840748	23.5537	0.0615331	0.227187	0.00797607
	25.293	0.227411	0.28618	0.0136816	25.4093	0.205068	0.224344	0.00648686
	26.958	0.342888	0.282795	0.00778547	27.4405	0.348556	0.233887	0.00931226
	28.4687	0.344653	0.279355	0.0096321	28.8105	0.414933	0.237113	0.0113839
	30.5521	0.422082	0.281905	0.0113057	30.1474	0.51663	0.229069	0.00800994
	32.4785	0.435664	0.290635	0.0120899	32.4795	0.506847	0.230569	0.00801442
	35.0981	0.191194	0.28728	0.00926513	35.0947	0.161929	0.229862	0.00788884
	36.4285	0.037724	0.28922	0.00863716	36.2949	0.0241174	0.246575	0.00915179
	37.1699	0.116671	0.28521	0.0077587	36.943	0.0707062	0.239537	0.00818979
	37.9835	0.17634	0.27679	0.00754569	37.6917	0.138936	0.236919	0.00798869
	38.8229	0.211259	0.272545	0.00697054	38.503	0.164819	0.240313	0.00985931
	39.7301	0.242039	0.268015	0.00925277	39.2531	0.160376	0.231444	0.00914086
	40.683	0.297333	0.268835	0.00683861	39.9975	0.203703	0.232013	0.00831075
	41.5395	0.349854	0.26621	0.00589824	40.9213	0.252336	0.234131	0.0101363
	42.4589	0.353225	0.26157	0.00769035	42.0263	0.32439	0.229844	0.00914126
	43.5329	0.348172	0.260675	0.00692077	43.2608	0.420012	0.236894	0.0117696
	45.0426	0.382145	0.260285	0.00627111	44.7859	0.45474	0.229106	0.00875313
	46.4242	0.210428	0.266475	0.00702627	46.1657	0.357949	0.231681	0.00938874
	47.4574	0.0604049	0.26464	0.00612113	47.3762	0.134021	0.239056	0.0137597
	48.6604	0.0511553	0.280305	0.0077132	48.82	0.0794906	0.241281	0.0105408
	49.7522	0.0950934	0.272105	0.00616214	49.9027	0.0924993	0.240313	0.0104005
	50.3982	0.0771979	0.2651	0.00709499	50.6036	0.0865397	0.2291	0.00966318
	50.9163	0.0733272	0.26234	0.00750062	51.1244	0.0958412	0.216375	0.00725182
	51.4689	0.0844406	0.25259	0.00595043	51.629	0.093909	0.216006	0.00909939
	52.188	0.101024	0.24963	0.00572115	52.3449	0.0982104	0.222231	0.00708792
	53.0286	0.0641988	0.25124	0.00578021	53.029	0.085617	0.223419	0.00746704
	53.6104	0.0295258	0.26042	0.00728075	53.6074	0.0384569	0.223587	0.00696003
	54.5104	0.1392	0.26741	0.00671335	54.4762	0.12885	0.223556	0.0080676
	55.7621	0.27774	0.2662	0.00798767	56.0266	0.326553	0.232806	0.00923586
	57.2889	0.263179	0.26741	0.00694222	57.3194	0.286171	0.226906	0.00897042
	58.9351	0.110585	0.25956	0.00809748	58.8941	0.20912	0.223794	0.00829195
	60.3956	0.0749713	0.25673	0.0067742	60.4764	0.0605144	0.228156	0.00812648
	61.2551	0.191948	0.258965	0.0061352	61.4014	0.177485	0.228094	0.00732905
	62.2946	0.258505	0.2563	0.00626174	62.2355	0.224457	0.228575	0.00853816
	63.3237	0.294973	0.2542	0.00576713	63.1051	0.262273	0.224181	0.00802681
	64.1316	0.317677	0.25017	0.00647582	63.9331	0.253101	0.2242	0.00768744
	65.0198	0.322667	0.24777	0.00733983	64.798	0.27769	0.218087	0.00779591
	66.1685	0.391083	0.24723	0.00677944	65.8161	0.29741	0.21675	0.00783141
	67.2198	0.386405	0.24908	0.00643744	66.9379	0.386451	0.218519	0.00821458
	68.4195	0.366637	0.248805	0.00672192	68.3747	0.346084	0.217106	0.0075042
	69.8081	0.29035	0.25253	0.00662742	69.8747	0.279284	0.219856	0.0086301
	70.7037	0.214121	0.25115	0.00743839	71.0279	0.128491	0.218825	0.00783649
	71.4753	0.0905556	0.255195	0.00790806	71.7198	0.0406348	0.219131	0.00789107
	73.7146	0.247768	0.262805	0.00951544	72.6522	0.18113	0.228412	0.0106975
	75.3685	0.335197	0.26382	0.00907023	74.763	0.317247	0.224319	0.00905406
	76.5179	0.378127	0.266955	0.00869772	76.0745	0.332331	0.220656	0.00931292
	78.0808	0.4329	0.26055	0.00807102	78.0653	0.412233	0.219056	0.00918868
	80.5915	0.349848	0.271195	0.0093541	80.377	0.437981	0.22	0.00904872
	82.9916	0.119336	0.272515	0.0093455	82.9598	0.139499	0.223694	0.00823597
	84.3908	0.0668418	0.279345	0.00688635	84.3731	0.0888905	0.242425	0.00875832
	85.0527	0.192245	0.272665	0.00649263	85.0557	0.15993	0.237212	0.00948326
	85.6316	0.209533	0.27122	0.00747891	85.8505	0.211448	0.232531	0.00841742
	86.4228	0.237033	0.266935	0.00632669	86.6222	0.235868	0.231962	0.0090576
	87.298	0.244578	0.26885	0.00689548	87.4859	0.241799	0.228494	0.0094423
	88.1925	0.250373	0.267005	0.00730843	88.3664	0.29323	0.228475	0.00854397
	89.0841	0.214244	0.26603	0.0077894	89.1343	0.301956	0.228169	0.00847269
	90.2271	0.26113	0.26486	0.00733637	90.0752	0.252945	0.227288	0.00920524
	91.6337	0.337948	0.262715	0.00813821	91.0422	0.208187	0.224988	0.00879288
	92.9537	0.249008	0.265645	0.00831262	92.8136	0.224027	0.226188	0.00908619
	94.2611	0.194913	0.265345	0.00888613	94.5927	0.181013	0.222806	0.00845654
	95.3664	0.0783302	0.267325	0.00959832	95.5819	0.0575903	0.2284	0.0100362

## Sheet: FastGamma
Accumulated power (mean+/-SEM) in the fast gamma band during TDW across the experiment.
Data are based on interval calculations (see Material and Methods)
	WT				KO
	Time(mean)	Time(SEM)	FastGamma(mean)	FastGamma(SEM)	Time(mean)	Time(SEM)	FastGamma(mean)	FastGamma(SEM)
	1.81379	0.266062	0.254411	0.01429	1.24516	0.309557	0.198806	0.0161668
	3.76974	0.355093	0.249274	0.0130903	2.97633	0.37319	0.197556	0.0159932
	5.06734	0.351904	0.253721	0.0161108	4.47545	0.414424	0.19955	0.0170568
	7.08448	0.355744	0.243111	0.0141448	6.43692	0.576522	0.199375	0.0176898
	9.4017	0.330662	0.242247	0.0131023	8.5113	0.492515	0.189519	0.0157094
	11.2181	0.117688	0.239742	0.0128344	11.0821	0.16542	0.188463	0.0158617
	12.3841	0.0425539	0.239258	0.0121267	12.358	0.0483295	0.188069	0.0161249
	13.114	0.109689	0.244132	0.0120189	12.9748	0.0993646	0.187075	0.0162305
	14.0358	0.128618	0.243068	0.0112019	13.8141	0.146546	0.189362	0.0157461
	15.0336	0.178807	0.246142	0.0119571	14.7295	0.199202	0.190988	0.0149655
	15.9512	0.214414	0.2455	0.0121974	15.5742	0.231931	0.191362	0.0166892
	16.7502	0.180839	0.243174	0.0118054	16.4498	0.264837	0.192513	0.0176053
	17.6963	0.155918	0.247705	0.0117379	17.2278	0.286048	0.19035	0.016618
	18.8796	0.236637	0.248058	0.0115826	18.3166	0.357412	0.194162	0.0181124
	20.0523	0.295289	0.245879	0.0120382	19.6496	0.394412	0.194531	0.0180805
	21.3703	0.254666	0.247584	0.0128986	21.1968	0.360131	0.190631	0.0168733
	22.4517	0.180853	0.250205	0.0120319	22.5018	0.176093	0.196325	0.0175023
	23.3603	0.081133	0.255842	0.0114744	23.5347	0.0607886	0.200819	0.0177725
	25.3428	0.233877	0.250895	0.0143689	25.366	0.201496	0.195387	0.0146262
	27.0116	0.356988	0.255442	0.0119361	27.4369	0.348736	0.19495	0.0178632
	28.5688	0.347635	0.242032	0.0130056	28.696	0.412735	0.199169	0.0167075
	30.6593	0.430343	0.244826	0.0144773	30.1015	0.496805	0.195563	0.0145517
	32.6738	0.410466	0.239589	0.0124173	32.4226	0.490072	0.189938	0.0148682
	35.2128	0.161247	0.242458	0.0107854	35.1141	0.16651	0.191019	0.0158269
	36.4133	0.0364102	0.240489	0.0123539	36.2869	0.0218527	0.189106	0.0146739
	37.1607	0.122603	0.246516	0.0122493	36.955	0.0695587	0.190037	0.0153223
	37.9728	0.185536	0.242784	0.0102472	37.7321	0.133762	0.191037	0.0150018
	38.8148	0.222522	0.245174	0.0120406	38.5618	0.157968	0.188481	0.0161324
	39.7494	0.254325	0.241547	0.0114665	39.2912	0.157581	0.188919	0.0158979
	40.7305	0.309392	0.244042	0.0114746	40.0176	0.201949	0.190419	0.0166633
	41.5844	0.365733	0.247258	0.0122334	40.9119	0.253494	0.192488	0.0184467
	42.493	0.370591	0.246763	0.0132904	41.9867	0.32964	0.1907	0.0163832
	43.599	0.360331	0.243732	0.0124684	43.1718	0.421393	0.19705	0.0171037
	45.1634	0.382137	0.240563	0.0125019	44.5665	0.453102	0.193912	0.0164447
	46.4555	0.21934	0.246326	0.0111654	46.0032	0.361939	0.193738	0.0160013
	47.4629	0.0634148	0.251068	0.0129569	47.3345	0.134308	0.196094	0.0163277
	48.6559	0.0537177	0.297484	0.0152937	48.8198	0.0794815	0.22395	0.0211999
	49.7483	0.100152	0.304453	0.0151782	49.895	0.091203	0.233206	0.0231101
	50.4005	0.0813377	0.310611	0.0160267	50.5881	0.0856802	0.234375	0.0227657
	50.9169	0.0772907	0.302811	0.0163284	51.1139	0.0959435	0.224288	0.0212825
	51.4776	0.0885412	0.291953	0.0149129	51.6385	0.0948778	0.220206	0.0216532
	52.2095	0.10405	0.280742	0.0125209	52.3667	0.101449	0.219175	0.0226025
	53.0499	0.0638215	0.283	0.0138394	53.0418	0.0873613	0.221463	0.0236373
	53.6162	0.0305154	0.297189	0.0162407	53.6164	0.0396087	0.23015	0.0239991
	54.4542	0.134232	0.253484	0.0131903	54.5421	0.133404	0.201556	0.0179962
	55.6368	0.261327	0.247605	0.0144097	56.1041	0.326687	0.195675	0.0163526
	57.2385	0.272289	0.243295	0.0129205	57.3854	0.290908	0.185906	0.0150154
	58.9496	0.115567	0.239116	0.0121351	58.9601	0.215693	0.192006	0.0178676
	60.4037	0.0785675	0.243895	0.0124109	60.4871	0.0587359	0.193112	0.0173517
	61.2901	0.198954	0.244474	0.0136258	61.4536	0.175011	0.193538	0.0177213
	62.3492	0.266348	0.244226	0.0126473	62.3017	0.23002	0.194394	0.0175608
	63.4095	0.297477	0.241063	0.0126497	63.1133	0.263349	0.196094	0.0196447
	64.2101	0.324458	0.239221	0.0111068	63.9403	0.254383	0.193562	0.0186738
	65.0553	0.338053	0.239421	0.0131932	64.7819	0.27404	0.192269	0.0184192
	66.2418	0.404932	0.238026	0.0133654	65.8111	0.296999	0.195106	0.0199498
	67.3163	0.394424	0.241311	0.0116634	67.0077	0.390658	0.190925	0.0177463
	68.4231	0.38645	0.238647	0.0121552	68.4286	0.348882	0.191544	0.0185444
	69.802	0.305989	0.239658	0.0125447	69.8459	0.278132	0.193444	0.0183266
	70.6845	0.224794	0.244011	0.013063	71.0175	0.127271	0.1943	0.0184649
	71.4759	0.0954521	0.247963	0.0142679	71.7161	0.0406269	0.200819	0.0179594
	73.7603	0.256702	0.240789	0.0134353	72.7781	0.195915	0.204706	0.0182759
	75.4728	0.335759	0.245384	0.0167628	74.9404	0.301159	0.197406	0.0180383
	76.6738	0.363088	0.250926	0.0164719	76.1161	0.330223	0.195194	0.0167749
	78.2557	0.417431	0.239126	0.0144278	77.996	0.406558	0.188225	0.0149365
	80.7357	0.336033	0.231495	0.01329	80.2243	0.446129	0.184638	0.0168727
	82.9761	0.124718	0.240189	0.0128631	82.9102	0.13986	0.189125	0.0155124
	84.3882	0.070406	0.247026	0.0137496	84.3672	0.0894957	0.193081	0.017228
	85.0528	0.202644	0.245089	0.0141766	85.049	0.160863	0.193931	0.0182117
	85.6437	0.220499	0.247342	0.0140881	85.8443	0.212435	0.19375	0.0177608
	86.4535	0.247759	0.245074	0.0119327	86.6055	0.23811	0.195294	0.0182915
	87.3493	0.25207	0.247237	0.0137606	87.4467	0.247378	0.192581	0.0165842
	88.259	0.254434	0.248174	0.0131212	88.3542	0.295087	0.194975	0.0178253
	89.1389	0.218317	0.247158	0.0141996	89.1212	0.304287	0.195394	0.0188391
	90.2901	0.267127	0.250758	0.0129179	90.0532	0.258138	0.19505	0.018333
	91.7336	0.3403	0.250942	0.0148821	91.0326	0.211025	0.197219	0.0194195
	92.9855	0.260325	0.249142	0.014833	92.8104	0.225137	0.192469	0.0171402
	94.2466	0.204891	0.248511	0.0154352	94.5356	0.200254	0.19075	0.0168076
	95.3796	0.0813909	0.2542	0.015977	95.5635	0.0637236	0.197213	0.0177446
