# Supplementary material for: Cold-inducible RNA-binding protein (CIRBP) adjusts clock-gene expression and REM-sleep recovery following sleep deprivation
Source: eLife. 2019 Feb 5;8:e43400. doi: 10.7554/eLife.43400 (PMC6379088; doi:10.7554/eLife.43400)
Supplement: Figure 6—source data 1. [file elife-43400-fig6-data1.xlsx]

## Sheet: Fig6-A LMA
Each value represents the amount of locomotor activity (accumulated counts) per hour. Each column has all hourly values of one mouse across the whole (=96hrs) experiment
	WT																	KO
Time[hours]	_1WT_CIRP03	_1WT_CIRP04	_1WT_CIRP05	_1WT_CIRP09	_1WT_CIRP11	_1WT_CIRP18	_1WT_CIRP19	_1WT_CIRP29	_1WT_CIRP30	_1WT_CIRP31	_1WT_CIRP48	_1WT_TC03	_1WT_TC06	_1WT_TC08	_1WT_TC12	_1WT_TC13	_1WT_TC18	_2KO_CIRP01	_2KO_CIRP10	_2KO_CIRP13	_2KO_CIRP14	_2KO_CIRP15	_2KO_CIRP20	_2KO_CIRP25	_2KO_CIRP40	_2KO_CIRP50	_2KO_TC01	_2KO_TC07	_2KO_TC10	_2KO_TC15	_2KO_TC16	_2KO_TC17	_2KO_TC19
0.5	37	1	29	10	20	0	5	0	0	0	0	9	10	4	21	0	0	0	3	6	0	32	4	0	5	58	5	21	33	1	1	8	24
1.5	44	4	0	14	0	0	0	12	3	2	0	23	7	7	82	0	6	0	0	0	0	0	13	0	3	0	1	13	0	0	45	0	8
2.5	16	0	70	3	3	0	2	0	29	0	0	3	0	0	6	4	0	0	0	10	0	0	3	12	22	12	2	52	78	37	21	2	29
3.5	18	5	0	3	0	9	0	53	92	2	0	17	10	0	0	0	0	0	0	0	21	18	0	4	6	50	0	0	6	0	4	0	7
4.5	1	0	5	4	59	13	2	0	0	43	7	3	0	26	15	0	0	2	33	46	0	0	130	1	31	3	0	0	167	2	17	86	0
5.5	102	3	3	2	3	0	4	4	5	6	30	36	0	0	0	7	3	0	0	63	0	0	0	2	1	14	12	25	0	0	2	3	64
6.5	22	0	74	28	0	2	1	18	4	0	2	13	3	2	1	0	0	0	8	0	0	24	0	2	0	4	4	0	133	0	2	34	0
7.5	20	3	0	13	25	4	0	0	7	0	0	6	0	6	69	2	0	0	5	14	24	0	0	2	7	58	0	18	0	2	2	1	2
8.5	43	0	26	9	4	3	0	13	2	2	2	34	0	5	1	3	1	0	0	0	0	7	58	0	0	3	11	3	1	0	16	5	21
9.5	18	0	3	23	17	12	3	3	25	21	9	35	1	1	4	0	0	0	0	0	0	0	0	6	3	25	0	6	57	3	113	74	4
10.5	62	1	1	4	49	2	8	13	19	1	0	5	3	14	4	0	6	0	0	4	1	6	7	2	13	25	5	3	0	0	7	6	40
11.5	26	5	7	19	42	10	8	21	6	18	65	40	6	5	16	1	13	2	3	25	7	6	28	3	20	64	22	44	2	6	30	21	189
12.5	259	26	43	171	211	132	95	105	118	106	94	38	114	92	124	31	82	16	264	151	307	204	102	406	128	79	175	187	181	90	381	176	187
13.5	64	9	41	50	187	49	113	99	13	44	42	8	37	59	205	41	52	2	252	75	363	165	59	387	70	34	181	101	208	144	402	143	179
14.5	220	27	39	37	212	55	90	69	25	53	36	11	29	47	143	19	14	0	211	23	307	117	8	366	82	24	30	106	215	123	361	43	159
15.5	169	29	12	29	174	61	160	76	105	33	31	23	2	13	133	23	45	4	139	111	292	166	38	304	25	63	206	72	210	121	440	129	34
16.5	27	14	47	12	265	34	99	72	56	80	17	8	67	95	147	47	55	16	128	82	252	109	21	233	7	110	73	195	117	140	396	63	158
17.5	200	5	55	61	325	167	68	106	51	72	53	19	52	19	0	24	9	0	234	175	257	203	48	202	124	21	56	49	246	56	389	147	117
18.5	127	21	172	46	14	7	162	28	38	45	0	44	117	20	97	7	34	6	21	22	184	43	8	135	24	35	71	46	158	0	313	39	20
19.5	55	9	25	74	174	88	39	61	59	8	16	27	21	6	35	25	41	6	168	52	10	50	107	79	0	44	54	60	147	69	24	86	54
20.5	81	9	53	15	0	27	0	30	7	77	40	2	45	52	0	9	20	0	0	10	104	50	0	326	0	37	1	38	24	26	305	48	13
21.5	156	2	70	63	133	101	13	52	32	26	0	3	26	7	3	18	12	3	28	33	220	31	105	83	24	33	29	40	31	124	46	82	19
22.5	26	14	10	13	96	24	81	16	26	35	59	17	58	6	61	2	26	5	72	36	22	119	9	73	94	39	53	110	203	38	228	44	102
23.5	145	14	38	18	143	95	8	104	69	22	67	67	29	33	125	5	8	6	129	48	179	64	24	273	171	76	77	101	283	55	227	81	165
24.5	8	3	1	14	18	5	10	1	11	2	0	159	9	0	13	0	0	0	0	1	1	2	3	2	9	21	4	24	9	5	1	5	3
25.5	15	3	50	2	7	0	0	0	14	0	52	101	7	12	26	0	1	0	2	7	1	0	8	11	0	10	0	49	0	1	74	13	0
26.5	0	2	3	10	30	3	0	14	11	0	30	58	6	0	79	6	0	0	1	2	0	0	2	5	55	0	6	59	57	8	26	31	1
27.5	49	4	3	2	10	8	0	0	81	0	0	11	10	0	3	0	0	0	4	1	9	29	0	2	0	1	21	64	0	3	11	45	160
28.5	0	1	0	5	3	0	1	42	5	21	0	3	9	0	134	9	0	0	0	52	4	0	3	2	0	0	0	11	171	0	0	4	70
29.5	1	0	44	22	2	0	0	0	0	35	20	53	15	1	17	0	0	0	9	0	0	0	73	0	88	79	0	5	75	69	25	20	3
30.5	59	6	0	0	7	23	0	0	3	0	0	3	12	12	11	4	0	2	0	2	0	6	28	17	0	4	6	63	0	1	0	18	6
31.5	20	3	0	0	1	0	2	0	36	0	6	6	6	4	11	2	0	0	0	0	0	0	0	0	0	0	8	37	247	7	9	9	8
32.5	18	0	5	4	4	2	0	2	2	6	3	0	18	0	19	2	0	2	5	2	1	0	2	2	4	18	0	19	0	0	11	8	9
33.5	12	1	7	0	10	2	5	18	0	0	10	0	10	2	29	5	0	0	0	7	1	12	7	0	12	21	5	9	3	1	5	33	30
34.5	19	0	6	11	26	6	2	3	19	12	8	5	14	7	9	3	8	2	8	3	0	0	4	2	9	5	10	42	6	9	42	49	44
35.5	16	2	9	14	53	12	5	10	23	22	17	19	9	24	5	8	16	6	1	11	0	30	14	4	16	29	33	48	20	10	52	25	128
36.5	173	22	78	205	151	106	125	99	128	136	87	37	119	142	228	39	79	14	214	85	359	230	57	365	136	173	280	163	269	69	405	247	195
37.5	254	15	19	191	137	67	147	50	37	73	24	62	36	74	200	38	124	3	181	75	237	125	11	270	75	52	247	135	230	107	391	168	187
38.5	127	5	23	108	239	38	244	71	69	93	57	23	95	38	74	31	49	5	118	7	243	139	39	210	60	2	82	102	125	82	358	89	208
39.5	108	19	38	82	187	88	207	60	8	40	34	41	93	5	215	51	48	13	259	157	263	223	50	309	85	132	194	61	140	111	348	177	212
40.5	150	20	13	77	153	41	204	63	121	98	11	14	53	61	105	41	29	16	101	93	197	121	16	218	30	78	82	149	62	38	366	57	13
41.5	127	6	22	172	250	76	149	83	45	37	25	48	61	32	101	37	79	18	219	3	184	10	23	154	0	29	110	218	167	78	302	123	140
42.5	104	24	55	193	75	26	4	8	95	139	82	52	45	7	159	41	1	10	47	158	131	129	37	128	148	63	28	20	94	28	193	10	173
43.5	11	2	142	145	84	51	53	96	15	4	0	32	70	29	18	4	42	2	88	19	175	42	29	178	34	63	70	83	176	34	173	10	57
44.5	71	11	5	59	31	16	110	9	39	88	19	5	88	1	3	22	4	1	7	26	162	57	40	89	0	112	6	107	19	6	183	123	3
45.5	115	10	33	85	87	75	7	10	16	40	11	5	103	32	52	25	43	11	121	8	65	11	5	58	38	9	22	11	28	20	219	16	57
46.5	36	14	38	64	127	49	67	102	80	49	27	12	59	16	55	25	5	8	138	39	232	46	51	157	26	38	62	144	213	52	6	43	42
47.5	111	23	95	51	63	136	48	74	58	29	90	97	47	47	69	6	51	12	192	38	79	93	18	236	133	78	117	103	292	98	219	110	197
48.5	151	108	122	155	86	143	87	42	238	44	50	90	53	57	63	37	28	72	59	71	33	47	79	6	68	53	73	102	128	50	49	32	37
49.5	143	84	102	139	127	213	91	69	112	13	122	171	50	99	117	27	22	32	94	109	39	94	99	23	170	56	77	97	177	15	87	31	135
50.5	442	187	284	282	289	218	75	237	601	165	333	213	75	207	334	136	57	87	214	201	293	312	230	104	604	275	342	391	251	103	288	218	233
51.5	380	157	238	285	199	215	268	177	202	120	149	126	138	104	296	150	111	182	309	326	231	345	193	113	288	273	280	373	476	153	334	372	452
52.5	412	330	218	254	119	220	334	106	206	107	125	80	89	89	0	55	38	172	180	148	107	189	96	48	398	224	235	181	0	58	203	110	121
53.5	174	145	171	191	262	346	294	220	201	90	212	140	86	110	237	128	181	88	399	282	465	373	280	99	107	141	434	251	274	153	208	339	186
54.5	18	62	51	7	35	33	61	23	62	6	13	39	9	44	16	5	2	16	53	81	31	88	35	62	88	92	66	120	27	26	71	22	23
55.5	54	36	16	3	6	19	11	17	18	4	7	5	4	18	0	0	0	0	3	41	5	0	0	0	21	39	0	45	22	0	14	4	10
56.5	18	0	29	23	26	20	8	6	0	7	2	6	14	33	4	6	2	16	8	24	18	13	29	2	16	41	27	139	25	7	21	7	23
57.5	39	4	47	7	6	0	19	15	17	2	2	4	2	29	5	4	7	0	15	4	4	18	3	19	3	8	11	52	8	1	47	9	4
58.5	106	21	8	23	6	6	8	6	4	0	0	8	10	2	36	2	5	5	2	4	25	18	7	8	17	9	17	22	139	3	36	45	43
59.5	28	18	12	59	39	0	10	12	6	10	28	12	6	10	3	2	8	0	2	10	16	15	13	2	24	26	12	55	49	2	52	12	35
60.5	250	39	53	152	167	52	83	93	178	218	103	34	134	116	123	19	72	27	111	219	365	105	64	289	112	191	196	110	279	66	422	246	222
61.5	175	16	11	30	170	40	40	50	48	162	24	23	83	112	101	8	28	8	68	164	326	106	13	265	69	106	100	66	379	104	378	180	204
62.5	89	22	2	49	157	51	55	46	3	119	53	18	50	102	50	21	41	14	89	98	287	86	103	198	72	69	30	89	236	106	444	143	226
63.5	151	24	26	19	74	66	53	91	117	96	77	20	16	12	20	18	10	13	223	84	250	175	8	206	126	50	182	108	435	139	274	228	19
64.5	263	11	13	75	164	7	66	101	135	66	13	25	43	15	126	23	47	13	204	115	262	18	34	239	0	122	55	141	69	43	225	158	131
65.5	302	26	72	44	166	111	142	12	141	37	6	52	32	126	100	17	2	54	27	18	279	169	39	275	29	115	158	61	133	100	166	21	258
66.5	228	46	32	110	137	67	26	65	48	93	19	4	12	18	16	13	13	110	95	90	112	97	104	332	59	66	256	7	366	142	30	6	75
67.5	32	9	9	5	51	0	17	99	6	39	5	4	15	2	7	26	3	67	94	4	75	0	56	139	0	31	112	117	43	6	274	155	7
68.5	9	9	10	20	41	42	71	6	76	20	0	5	2	5	69	0	33	0	0	52	291	46	49	44	10	15	0	43	59	8	15	0	0
69.5	123	14	71	29	143	59	8	15	23	103	15	4	23	0	12	0	8	11	27	10	112	110	45	185	0	120	73	9	182	23	164	13	121
70.5	5	13	48	70	104	24	5	122	34	41	13	42	43	17	45	5	15	0	27	7	61	33	69	276	65	69	90	99	199	34	172	11	114
71.5	115	35	84	39	79	97	55	74	16	91	126	87	48	62	106	4	10	25	230	63	222	117	122	111	117	33	210	255	209	143	186	163	235
72.5	2	3	0	20	6	0	2	0	2	0	4	18	5	25	6	0	0	4	12	59	24	4	4	0	28	7	13	195	115	11	24	17	18
73.5	4	9	22	8	0	0	0	8	86	8	5	10	16	18	65	0	0	2	5	4	1	0	0	2	82	4	0	163	0	0	10	0	4
74.5	9	1	0	2	49	0	2	5	106	0	7	0	2	5	0	0	0	2	0	15	0	4	3	10	0	0	6	0	19	8	8	8	15
75.5	9	24	67	1	0	12	22	2	4	2	3	0	22	1	37	2	0	0	19	25	0	30	5	3	0	19	22	3	10	0	53	13	9
76.5	224	12	0	4	64	92	0	40	4	1	13	60	5	66	0	5	4	2	0	4	20	6	0	3	46	66	25	0	95	13	4	2	34
77.5	46	55	0	2	0	0	11	2	4	50	13	28	5	3	9	0	0	51	15	0	0	15	63	4	0	24	9	89	32	2	5	43	2
78.5	320	0	42	24	0	14	0	6	0	14	20	0	2	7	4	6	6	0	5	2	0	17	0	0	12	103	0	0	15	7	10	3	8
79.5	68	5	0	0	10	0	2	9	23	4	0	0	16	20	1	0	0	14	0	2	0	0	0	8	2	3	2	6	18	0	2	5	3
80.5	66	6	0	35	3	0	0	5	0	7	0	0	0	9	7	0	6	2	2	0	0	9	0	2	5	24	22	3	14	2	37	2	8
81.5	65	5	8	0	0	3	1	5	18	2	3	0	25	12	3	2	7	0	0	0	0	2	2	1	21	3	1	19	15	0	3	14	27
82.5	54	22	4	2	9	2	3	20	9	16	32	8	17	31	7	2	5	5	0	2	13	2	15	18	31	10	5	21	65	4	23	9	22
83.5	106	41	5	7	17	0	3	10	6	0	7	15	23	9	33	4	13	8	9	6	4	22	4	4	51	5	22	53	18	7	101	32	90
84.5	275	75	40	191	342	81	136	127	90	166	155	141	179	169	194	40	126	44	304	216	355	199	89	485	230	174	370	228	545	174	450	225	280
85.5	123	79	26	97	212	121	150	91	56	167	32	58	135	83	256	14	169	48	255	69	446	161	59	604	162	75	386	113	454	186	546	225	160
86.5	74	12	4	36	219	102	128	117	57	106	48	23	36	27	212	23	6	13	223	74	444	221	21	463	147	155	176	193	457	184	468	116	210
87.5	222	43	8	123	73	20	108	65	112	127	53	50	79	28	45	7	91	10	116	108	351	126	5	363	135	48	259	115	317	185	370	185	146
88.5	161	118	49	92	371	116	162	46	58	197	50	14	81	25	209	0	15	21	227	82	390	252	49	442	1	180	269	48	173	134	361	126	17
89.5	88	4	53	74	242	31	122	100	17	89	4	30	40	33	237	5	46	58	224	28	326	115	29	434	148	67	132	128	345	7	185	141	180
90.5	42	85	104	36	104	126	4	3	95	33	65	2	18	75	31	5	77	40	0	78	344	97	51	241	147	134	200	10	297	150	131	0	181
91.5	138	56	17	58	12	34	33	74	16	163	13	12	100	12	5	0	1	7	141	1	205	117	29	204	0	84	5	87	253	82	78	112	64
92.5	65	11	21	51	197	53	76	67	24	30	37	5	45	18	4	2	42	19	83	21	0	76	8	46	34	28	111	3	37	20	211	21	95
93.5	110	60	96	55	46	68	9	6	21	44	7	6	32	0	108	3	44	4	0	4	190	126	41	60	79	86	16	98	141	61	58	51	60
94.5	56	181	0	35	108	125	58	66	88	72	43	30	19	71	140	0	8	8	114	26	293	32	18	313	58	37	85	80	187	29	44	71	17
95.5	198	50	170	23	171	112	14	21	54	39	31	144	35	36	40	2	22	30	197	92	236	148	99	186	185	85	128	158	308	102	275	67	107

## Sheet: Fig6-A Waking
Each value represents the amount of waking in minutes per hour. Each column has all hourly values of one mouse across the whole (=96hrs) experiment
	WT																	KO
Time[hours]	_1WT_CIRP03	_1WT_CIRP04	_1WT_CIRP05	_1WT_CIRP09	_1WT_CIRP11	_1WT_CIRP18	_1WT_CIRP19	_1WT_CIRP29	_1WT_CIRP30	_1WT_CIRP31	_1WT_CIRP48	_1WT_TC03	_1WT_TC06	_1WT_TC08	_1WT_TC12	_1WT_TC13	_1WT_TC18	_2KO_CIRP01	_2KO_CIRP10	_2KO_CIRP13	_2KO_CIRP14	_2KO_CIRP15	_2KO_CIRP20	_2KO_CIRP25	_2KO_CIRP40	_2KO_CIRP50	_2KO_TC01	_2KO_TC07	_2KO_TC10	_2KO_TC15	_2KO_TC16	_2KO_TC17	_2KO_TC19
0.5	19.2	17	20.06	21.87	16.13	7.33	26.33	12.94	6	9.8	18.4	33.6	28.73	22.53	34.34	9.26	8.06	13.4	36.54	25.4	15.26	36.74	30.73	4.4	35.8	28.67	14.87	20.2	31.4	42.8	6.94	21.4	37.33
1.5	19.07	27.93	10.6	32.27	10.2	9.6	17.26	16.06	20.53	22.2	18.47	35.53	34.93	16.07	33.6	20	28.13	18	10	14.86	24.67	10.47	21	19.2	22.86	6.27	14	20.33	6	9.33	22.33	9.74	9.87
2.5	16.2	16.07	25.93	12.47	18.4	6.87	19	6.54	30	16	18.2	5.07	8.6	12.4	25.26	20.87	17.73	26.14	12.54	27.6	8.13	8.47	18.13	40.47	20.27	27.53	22.2	25.46	49.6	44.33	27.27	27.93	36.33
3.5	26.34	25.26	18.33	10.46	11.53	24.54	19.87	46.4	35.87	14.06	11.54	28.4	34.6	10.47	9.33	11.2	9.07	16.6	14.27	20.67	46.93	33.67	12.2	16	23.26	32.14	14.2	13.33	23.33	6.27	11.6	8.33	11.14
4.5	12.07	16	14.4	19	37.8	25.6	14.6	12.8	15.67	51.6	33	16.8	18.33	47.8	37.27	10.67	19.6	19.4	50.07	25	23.73	9.14	56.93	16.53	26.13	20.4	8.2	8	34.46	21.66	22.8	54.53	9.93
5.5	35.66	27.94	14.4	20.53	11.73	6.93	18.67	15.06	13.67	19.13	32.4	14.26	18.07	9.74	20.27	56.93	13.27	20.66	9.13	39.53	14.6	23.26	8.8	19.54	16.4	10.47	24.86	38.4	6.8	19.2	6.67	10.86	42.4
6.5	16.6	13.2	34.13	31.2	16.27	20.4	20	30.6	18.73	21.2	17.67	20.6	28.73	30.8	12.4	8.33	27.8	11.54	19.67	5.94	8.47	34.2	27.07	24.93	7.47	22.07	39.87	12.8	46.14	9	20.13	32.13	7.27
7.5	5.07	27.47	7.93	18.07	26	15.4	22.74	7.8	26.54	17.47	15.73	8.74	19.94	23.67	43.13	20.4	13.6	23.74	33.4	34.93	40.6	9.4	12.27	12.27	38.4	37.26	14.4	27.53	5.87	17.27	4.4	10.67	16.07
8.5	35.8	26.47	28.73	17.4	11.8	27.87	9.8	31.33	11.4	24.4	21.87	30.66	11.53	24.6	9.4	25.67	26.6	20.53	13.14	10.6	12.8	18.4	48	11.46	15.33	5.8	36.13	10.07	14.33	23.53	35.94	9.93	29.2
9.5	14.54	13.26	11.13	26.8	23.6	30.27	34.4	19.6	41.6	33.74	35.13	30.27	27.4	15.2	22.6	13.07	8.54	16.87	14.93	18.27	19.67	19.33	10	21.87	21.26	41.33	9.8	27.47	56.33	22.94	42.94	51.6	24.4
10.5	32.74	27.73	29.93	20.13	27.14	19.2	35	20.73	27.2	21.4	19.94	20.33	30.8	35.8	26.8	25	36.53	18.8	33.34	21.34	25.67	23	30.33	38.27	24.74	28.26	28.93	29.8	9	16.26	24.13	22.53	34.67
11.5	27.4	30.27	28.07	37.4	45.53	32.6	29.8	29.93	30.73	36.6	37.93	32	30.06	26.8	29.33	31.4	27.13	24.27	32.94	48.26	33.93	37.13	35.47	24.27	42.87	46.4	41.6	41.94	34.6	25.53	32.87	32.66	53.47
12.5	59.4	48.6	46.27	55.46	57.8	59.66	55.87	54.27	59.47	60	59.4	49	58.86	56.2	55	51.2	55.8	47.33	60	60	60	59.47	57.53	60	58.8	48.6	59.4	60	51.2	59.87	60	60	59.8
13.5	50.14	37.2	42	60	55.27	47	54.86	58	33.93	53.8	48.94	34.87	34.86	47.07	60	45.87	54.66	23.94	59.13	53.87	60	59.6	36	60	57.53	33.27	60	49.47	49.8	59.74	60	60	59.53
14.5	59.34	54.33	32.2	59.73	55.6	38.87	56.8	45.67	31.4	53.8	40	37.33	39.93	32.4	56.6	38.2	39.06	24.07	59.07	34.47	60	44.33	25.26	59.53	56.74	26.8	31.8	60	59.27	58.93	60	41.8	52.73
15.5	59.67	27.4	32.33	47.8	54.13	42.87	58.34	49.6	59.47	41	30	46.93	24.46	22.47	50.47	40.2	55.2	32.6	47.66	56.26	59.6	58.66	45.73	59.2	31.27	36.2	60	60	59	59.13	60	60	18.73
16.5	21.13	24.07	41.33	42.74	59	33.87	55.33	37.94	41.67	51.73	28.13	36.47	53.53	48.53	55.34	50.4	49.6	42.93	49.13	37.26	59.87	45.14	29.14	56.27	26.8	54.87	42	60	44.6	59.07	60	42.07	55.54
17.5	60	25.73	44.13	54.8	60	60	37.94	59.34	41.53	49.2	58.2	35.67	39.54	28.13	13.67	35.4	21.8	26.66	59.13	59.74	59.53	55.87	51.34	48.4	60	47.67	53.13	42.73	60	53.6	56.73	58.26	51.27
18.5	50.74	43.73	55	47.14	30.14	24.47	60	26	38.66	44.26	15.66	42	52.8	36.54	56.13	29	30.93	25.46	18.87	29.07	53.6	31.93	26.4	49.47	39.67	24.07	48.53	36.4	60	14.13	53.6	20.46	21.2
19.5	37.13	27.26	25.27	50.6	60	41.33	42.14	47	39.94	26.2	25.34	45.2	18.13	25.06	35.53	35.47	41.73	36.46	48.8	37.6	15	29.73	53.6	36.33	11.27	28.4	51.46	42.33	52.93	46.33	19.07	47.6	45.2
20.5	38.6	37.93	31.2	35.93	15.8	31.53	27.6	33.53	33.26	60	43.93	10.14	25.47	42.47	9.33	26.6	30.2	20.73	27.6	27.2	37.54	21.67	14.73	57.8	9.26	29.4	12.93	23.86	23.4	24.93	60	28	13.6
21.5	47.33	25.53	47	51.94	45.73	56.46	28.07	45.6	31.33	36.47	24.13	20.53	30.4	35.8	24.46	37	24.33	30.47	31.14	26.93	58.2	34.07	54.86	41.8	28.94	36.26	37.26	24.13	24.07	60	22.6	39.8	22.6
22.5	34.2	41.2	31.53	42.53	42.4	33.87	57.07	24	33.93	35.74	39.34	40.94	39.4	25.13	39.27	18.13	44.73	35.67	32.94	32.4	21.4	42.53	34.46	41.06	55.2	30.8	41.8	56.67	53.13	26.27	52.13	31.33	48.8
23.5	44.47	39.2	36.54	36.4	50.74	42.54	29.93	55.74	42.27	26.4	47.13	60	43.4	38.67	48.8	18.86	37.4	22	58.6	45.54	54	42.73	39.2	50	53.66	51.67	46.6	60	60	44.93	54.33	47.27	59.73
24.5	14.73	29.2	10.6	27.06	15.8	13.27	19.8	13.93	22.8	15.34	7.87	38.73	26.14	13.26	28.53	10.14	9.07	19.07	18.33	18.66	11.2	13.13	16.93	15.46	60	25.27	17.87	39.93	17.46	31.73	3.87	7.07	16.74
25.5	24.2	20.8	27.87	16.07	22.26	8.86	14.27	12.07	18.2	20.2	42.4	36.4	11.6	21.33	25.93	18.53	9.93	25.67	15.8	21.27	23.54	20.06	19.2	22.33	16	34.27	17.87	24.87	6.94	19.73	43.13	29.14	14.93
26.5	21.8	15.2	11.93	20.53	26.86	15.8	21.33	15.74	23.67	14	30	21.8	20.67	17.4	39.47	22.2	20	24.27	23.13	11.47	6.2	9.2	22	18	44.46	10.07	18.46	35.2	29.54	19.07	22.87	37	10.4
27.5	29.13	28.8	24.07	20.8	21.53	26.07	14.54	11.53	38.93	23.47	16.67	15.53	21	25.93	13	16	16	18.8	21.14	24.27	30.54	41.6	12.33	15.07	16	26.6	36.33	34.87	5.2	17.06	25.8	24.13	49.86
28.5	9.27	29.33	13	17.66	12.4	8	13.86	36.67	18.34	25.13	13.8	11.67	24.87	9.2	41.86	33.4	7.2	20.8	16.27	44.47	39.47	8.13	11	18.47	9.67	7.27	10.33	10.67	46	9.46	5.53	10.86	29.2
29.5	14.4	7.4	40	38.27	18.73	12.67	28.14	5.6	10.27	40.2	19.87	34.33	24.4	22	19.6	10.27	24.74	22.87	31.27	9.07	7.8	15.47	39.2	6.27	40.87	53.2	16.2	7.07	24.86	49	37.07	23.66	7.6
30.5	25.07	30.74	5.8	13.53	17.67	40.4	11.4	23.47	23.46	19.13	11.2	7.67	12.8	33.07	22.33	24.67	16.93	27.2	14.93	22.66	24.33	21.8	23.4	42.4	16.33	22.47	21.27	42.74	7.33	14.46	8.8	20.8	14.93
31.5	12.26	13.6	11.47	11.53	14.86	10.27	23.34	16.8	32.13	13	32.13	11.93	25.87	16	21.67	17.4	18.4	21.74	21.67	11.47	10.6	22	18.6	7	5.86	16.4	31.53	10.6	54.33	24.4	21.33	13.8	26.4
32.5	17.93	22.54	15.73	28.47	11.93	23.6	13.33	17	22.14	23.87	10.6	10.67	29.8	20.6	15.94	13.94	19.87	18.34	30.33	12.13	15.54	13.26	15.4	24.6	19.53	24.6	16.6	25.46	4.2	10.67	18.34	23.4	14.67
33.5	24.87	21.73	24.47	14.94	28.53	15.6	28.27	17.93	14.07	16.06	31.2	17.4	18.8	29.2	25.33	28.73	19.6	20.4	12.33	30.87	28	18.6	24.86	23.53	29.6	24.46	25.13	14.87	21.8	14.07	21.2	26.87	33.33
34.5	31.53	25.8	17.54	28.2	26.93	23.2	22.13	19.87	33	32.4	26.27	26.86	24.33	24.53	21.4	27.66	29.27	10.87	30.27	31.33	25.67	18.6	22.2	17.53	26.2	27	24.4	30.74	24.73	33.2	41	39.8	26.13
35.5	18.13	21.67	26.93	37.47	38.8	32.4	27.67	31.73	29.4	40.53	39.54	40.33	31.2	34.93	30.13	25.6	25.4	31.6	21.8	37.46	22.27	37.13	29.93	30.73	33.47	44.6	43.13	33.33	29.66	23.87	39.74	34.07	44.2
36.5	58.87	46.2	52.27	59.67	54.33	58.74	57.27	59.13	60	60	58.66	49.26	60	60	58.4	46.07	56.86	36.8	59.33	49.4	59.6	60	59.8	60	60	58.53	52.93	60	58.8	52.74	60	60	59.8
37.5	60	37.07	32.2	60	48.8	46.07	55.2	43	41.46	51.47	43.13	49.8	38.2	48.87	59.73	41.94	58.87	33.07	59.2	49.6	56.2	58.4	43	58.73	59	43.06	60	60	57.27	59.54	60	60	59.87
38.5	60	30.6	34.26	52.4	58.54	38.07	60	56	48.2	54.27	40.8	33.06	49.74	43.47	45.4	40	38.67	33.27	45.2	22.13	53.94	53.47	38.94	51.66	53.47	23.74	45.07	59.53	47	52.27	60	41.8	58.73
39.5	57.46	35.73	38.14	39.86	55.33	49.47	59.87	39.33	25.6	37.94	44.33	54.26	47.54	20.34	58.53	51.4	44.13	28.67	60	60	56.33	60	47.73	59.6	57.53	58.94	60	39.4	42.8	58.14	60	59.6	58.8
40.5	60	47.4	39.14	51.8	53.53	39.14	60	42.33	50.4	54.73	36.4	36.13	45.8	45.06	43.33	42	32.74	39.94	49	60	51.8	55.4	46.4	57.4	39.4	45.8	41.2	60	31.46	28.93	59.87	35.4	9.74
41.5	49.07	38.4	27.27	60	60	44.8	60	56	37.47	32.93	40.34	45.87	36.6	43.6	42.13	34.2	54.8	40.54	58.67	14.67	56.93	24.06	31.46	55.06	7.46	21.53	53.13	58.66	57.86	60	58.46	58.8	44.93
42.5	53	30.47	39.6	60	35.73	38.93	29.46	16.47	54.2	60	59.87	41.8	24.73	22.07	58.67	50.87	26.86	28.07	30.46	56	35.2	56.07	43.67	42.54	56.94	43.13	41.2	13.34	33.07	44.93	48.53	20.34	59.73
43.5	21	14.6	43.73	53.13	52.2	36.6	33.6	56.27	28.67	28.4	17.87	40.4	28.4	32.66	24.46	23.27	43	16.33	41.07	29.6	44.14	31	32.53	44.93	36.26	35.87	43.4	40.8	58.47	33.94	32.93	29	30.6
44.5	43.2	38.46	23.74	47.6	21.6	36.47	51.73	22.2	35.34	44.4	38.53	31.07	32.8	21.13	18.53	30.67	22.34	34.2	24	24.4	46.67	41.87	48.73	38.53	9.87	55	29.07	39.14	22.33	30.53	36.94	53.94	24.2
45.5	48.06	27	33.47	45.73	45.26	46.13	17.46	25.46	24.33	39.6	22.07	14.73	33.4	25.6	38.94	29.53	47.4	29.53	36.87	23.4	34.6	29.73	21.67	33.46	32.93	18.53	33.93	8.13	28.07	36.07	52.27	15.87	35.87
46.5	35.54	41.73	38.2	48.8	42	48	38.74	49.47	41.2	47.26	42.07	27	51	32.27	42.14	34.2	23.14	21.73	51.47	30.73	58.94	26.2	43.66	45.67	28.73	34.27	45	59.73	59.86	39.07	8.53	36.67	29.6
47.5	47.26	60	42.53	43.2	42.27	51.94	45.6	60	46.34	38.33	53.66	54.47	43.8	43	43.33	21.6	49.6	47.86	52.47	38.93	33.2	42.6	43.4	60	50.47	36.67	60	60	60	52.6	56.66	54.6	59.87
48.5	59.86	60	59.93	60	60	60	60	60	59.73	59.86	59.8	60	59.93	59.53	60	60	58.53	60	60	59.73	60	59.6	60	59.33	60	59.4	60	60	59.6	60	54.74	58.6	57
49.5	60	60	56.8	58.13	60	60	58.47	59.73	58.93	59.86	60	60	60	60	60	55.6	54.26	60	59.87	59.86	60	60	60	59	60	59.6	59.8	58.8	58.93	60	59.14	57.53	59.6
50.5	60	60	60	60	59.6	59.8	59.73	60	60	59.67	60	59.47	59.8	60	60	59.8	58.93	60	60	60	59.8	60	60	58.46	60	60	60	60	59.34	60	60	60	60
51.5	59.73	60	59.87	59.6	58.93	59.33	59.8	59.8	57	56.4	58.33	59.4	57.13	58.06	59.73	59.73	57.53	60	60	59.86	59.67	60	59.73	57.14	59.8	57.93	60	59.4	60	60	57.87	60	59.8
52.5	57.46	60	58.93	59.4	58.54	59.14	58.74	58.73	56.47	58.27	55.33	56.86	54.2	59.13	53.93	57.86	51.6	60	59.2	59.6	59.8	59.86	59.6	54.86	59.73	59.87	59.26	58.74	56.33	59.2	49.73	51.87	53.2
53.5	59.13	59.87	56.47	55.67	57.4	58.67	59.67	59.6	57.2	57.47	56.86	58.4	58.26	58.8	59.8	57.67	59.53	59.07	59.26	58.6	59.8	59.06	59.4	57.2	60	58.47	60	59.47	57.33	58.4	56.14	58.87	58
54.5	13.33	22.66	24.54	9	24.13	20.06	25.47	21.6	31.8	14.07	19.07	29.66	15.6	32.53	14.74	14.8	20	31.67	27.34	27.2	19.2	27.27	31.87	30.87	27.74	30.2	31.73	37.8	7.73	13.67	25.33	13.73	13.4
55.5	28.07	26.2	21.94	17.27	14	29.8	21.94	26.2	16.07	12.86	20.46	14.6	14.2	15.73	12.2	6.4	15.87	13.2	14.07	22.2	7	6.07	11.67	3.2	21.86	24.46	4.8	21.94	14.4	10.93	12.53	15	17.07
56.5	10.6	15.13	31.73	24.86	15.66	26.87	13.46	4.67	10.73	20.87	18.87	26.93	17.06	28.93	13.4	16	17.2	34	15.94	23.94	24.6	16.4	31.54	14.47	21.13	24.6	29.4	42.66	18.2	24.6	18.2	14.47	23.94
57.5	31.67	18.4	38.87	18.14	21.07	19.33	15.67	25.87	28.8	18.07	18.27	23.8	17.6	40.6	17	19.6	21.66	22.46	22.4	17.34	16.4	22.74	13.6	20.6	22.4	19.14	18.2	26.86	20.14	9	30.2	23	10.74
58.5	30.86	27.67	13.07	20.73	20.66	17.93	14.53	9.87	21.34	14.53	19.67	19.73	25.47	19.2	30.13	12.33	25.67	19.4	22.06	18.54	27	17.6	27.14	27.4	29.93	19.8	28.33	24.07	32.8	22.2	29.6	26.26	33.94
59.5	29.67	32.27	24.4	37	30.06	25.66	21.06	29.73	24.73	41.07	31.53	33.46	31.93	33.13	21.33	21.53	29.34	20.54	23.4	33	27.6	27.8	37.2	19.53	34.86	31	19.93	29.66	31.2	24.07	29.06	36.93	33.27
60.5	53.4	46.6	42.93	54.13	54.8	48.73	54.2	56.14	59.73	58.86	57.4	47	52.93	51.13	49.6	42.34	53.73	40.27	51	59.67	59.53	54.73	51.2	60	47.2	58.93	57.13	50.07	52.06	49.2	59.93	60	59.4
61.5	51.93	31.13	25.34	38.87	57.8	36.74	25.53	42	36.33	60	27.2	28.86	46.94	42.2	53.2	30.06	39.4	31.27	45.87	48.2	57.94	42.13	27.93	59	35.13	45.6	37.27	34.8	54.07	54	60	59.4	59.4
62.5	36.93	27.06	25.4	45.46	56.47	32.26	45.74	43.4	24.34	55.06	37	44.46	25.73	48.34	35.8	33.73	32.07	35.2	41.6	37.46	56.07	39.6	59.8	55.4	48.14	36.53	29.13	47.6	45.47	54.73	59.87	45.73	59
63.5	56	34.53	32.74	22.53	41.8	43.6	38.4	59.94	51.13	52.94	42.4	30.93	29	21.2	16.94	33.46	26.07	27.66	51.53	32.8	46.4	60	21.53	53.4	60	28.26	51.53	59.34	59.67	54.66	59.74	54.34	18
64.5	59.4	20.74	25.73	52.27	58.93	23.34	47.4	49.86	57.8	54.47	19.6	31.06	44.54	25.66	58.74	50.67	47.47	26.06	60	52.6	56.33	30.4	38.73	57.54	11.46	47.93	27.87	59	24.46	25.13	48.14	55.54	45.53
65.5	60	33.8	48.53	35	55.67	48.46	59.4	12.54	52.06	27.73	18.93	59.14	27.53	56.27	46.07	35.73	19.93	46.87	43.2	26.93	55.87	54.2	39	56.8	32.87	47	41.4	30.8	46.14	48.6	52.2	20.2	58.8
66.5	60	55.93	36.6	59.46	51.53	48.07	34.2	40.27	29	52.4	40.6	16.8	14.14	28.86	24.73	27.46	30.53	58.6	40.47	45.66	33.13	43.06	45.13	57.67	43.73	31.74	60	18.47	59.53	58.87	19.73	22.53	31.2
67.5	34	19.34	21.33	34.53	31.94	20.6	35.2	56.4	20.87	45.07	13.74	15.94	25.53	19.74	12	42	15.07	28.2	40.93	12.86	25.34	5.34	22.14	43.86	9.93	18.67	41.27	49.27	14.34	16.8	59.47	59.13	21.54
68.5	15.54	23.07	27.34	48.4	20.94	35.33	58.2	6	38.27	22.67	30.27	25.93	22.94	20.14	44.66	17.73	44.93	10.4	11.73	41.6	58.87	36.66	28.4	16.73	24.67	20.73	13.4	28.47	28.27	16.6	14.54	18.74	4.93
69.5	57.07	22.94	56.87	31.53	43.54	37.07	29.2	21.6	28.33	46.54	23.2	31.67	29.93	19.14	19	11.93	24.66	27.8	34.73	20.54	32.53	44.47	23.53	51.67	10.34	50.07	38	18.2	40.34	31.87	50.73	20.4	50.33
70.5	19.53	24.13	33.53	47	53.67	34.4	17.4	60	20.26	27.8	22.4	40.33	46.06	27.53	28.87	33.73	41.4	17.27	21	16.13	28.13	25	34.73	54.54	52	27.4	39.06	38.73	48.26	22.93	45.2	24.93	42.2
71.5	47.53	58.8	36.2	38.87	22.73	58.06	42.67	36.14	28.73	45.6	58.87	60	45.2	49.67	53.6	15.2	36.26	44.93	60	39.8	60	50.27	60	43.14	50.47	40.8	60	60	31.26	60	40.93	50.13	59.07
72.5	8.46	14.87	12.8	29.6	17.54	14.26	12.13	4.46	11.2	6.07	17.54	33.13	12.4	43.27	16.27	6.86	5.87	32	30.87	55.66	27.6	12.53	17.53	5.07	36.07	24.73	24.93	60	40	27	23.33	27.06	18.47
73.5	10.13	23.6	31.14	13	4.67	13.8	27.33	22.94	46.8	23.93	25.2	34.13	23.46	19.26	52.13	20.93	14.13	14	16	17.2	10.13	10.26	9.67	21.4	50.54	20.27	13.73	55.73	5.2	6.86	10.86	5.93	6.94
74.5	18.93	16.86	5	26.67	39.2	16.67	12.73	17.33	47.6	11.07	17	7.27	23	12.07	6.47	6.87	16.13	29.14	14.4	19.13	18.13	13.34	25.06	36.47	23.47	6.8	17.6	11.73	17.26	23.53	12.6	21.87	25.46
75.5	22.13	37.07	39.2	22.66	5.13	18.34	23.4	8.87	18.6	19.67	28.46	20	45.87	13.4	35.27	26.93	7.6	21.53	21	26.14	8.07	27.47	15.93	28.26	9.67	34.4	30.33	22.26	15.8	7.8	37	32.53	20.2
76.5	40.94	19.06	9.53	29.87	50.46	46.8	17.14	41.13	19	25.33	14.26	28	25.53	49.26	6.6	22.8	38.6	17.4	31.8	24.73	55.53	20.47	9.6	18.27	40.33	37.33	28.86	6.47	36.54	45.53	14.4	16.8	39.94
77.5	8.53	40.46	6.07	12.8	5.86	6.67	39.53	15.66	13.8	43.67	41.26	23.34	15.47	15.93	22.13	15.27	7.4	42.6	29.06	9.67	9.13	12.93	50.67	29.73	5.47	28	16.34	38.73	20.53	7.73	11.33	44.46	12.14
78.5	46.74	8.33	31.2	31.13	19.14	29.8	10.74	20.14	16.2	28.87	33.33	17.8	14.8	15.8	24.94	25	35.67	16	11.6	20.8	20.14	30.4	4.93	5.8	34.4	38.14	24.27	11.73	19.73	37.06	23	14.86	20.34
79.5	8.33	30.74	8.87	16.66	13.14	23.13	31.47	22.07	36.6	12.87	16.53	16.14	31.74	29.86	15.74	22	7.2	25.73	16.93	11.86	9.14	11.74	19.34	36.8	12.53	27.74	19.6	29.26	29.54	7.93	12.4	14.67	24.27
80.5	16.33	10.93	18.8	28.74	21.8	13.13	9.87	25.13	10.46	29.6	20.2	16.66	8.33	31.14	17.94	11.54	19.86	19.87	30.4	29.67	26.6	23.87	23.2	23.66	21.27	19.4	43.53	17.94	23.66	23.54	45.67	8.07	24.74
81.5	17.46	36.2	34.33	24.13	21.66	22.67	21	17.26	39.2	15.6	25	25.53	35.6	24.14	11.07	20	30.87	11.87	25.07	12.66	13.2	22.2	27.47	11.6	30.07	16.94	11.2	29.53	20.93	7.6	11.87	33.8	29.46
82.5	22.4	26.47	23.06	28.53	31.53	22.4	29.13	24.87	21.4	34.86	40.73	25.67	22.74	32.67	24.6	28.07	14.66	23.2	21.14	32.06	35.2	16.73	29.47	30.8	33.67	34.87	19.07	27.73	38.06	27.53	31.87	22.2	21.73
83.5	37.94	38	19.87	31.74	27.26	30.07	25.4	30.93	29.06	32.67	30.53	32.87	35.73	30.2	34.27	27.47	38.2	26.4	34.6	31.14	34.53	36.27	25.86	34.67	45	35.4	38.33	33.8	29.6	36.87	43.93	41.07	30.8
84.5	56.66	55.2	46.2	59.4	59.54	53.34	58.13	60	58.53	60	60	59.67	60	59.26	59.93	53.8	59.54	43.87	60	59.54	59.47	58.87	59.33	60	60	49	56	59.93	59.6	59.54	60	60	60
85.5	59.86	52.47	38.4	49.2	58.33	56.67	59.87	52.73	49.47	59.2	37.13	57.2	48.2	53.87	60	39.6	58.8	41.33	60	46.94	59.73	57.4	57.74	60	60	35.94	58.13	59.8	59.8	60	59.6	59.93	59.4
86.5	41.67	27.26	26.47	31.67	57.2	50.53	50.6	54.06	40	46.87	43	39.53	37.27	37.06	59.33	44.33	24	34.33	57	36.67	60	57	43.67	59.8	58.86	52.2	44.53	59.73	60	59.67	60	44.47	59.47
87.5	54.26	31.4	29.66	54.27	30.74	33.4	49.4	40.53	53.4	54.4	40.8	41.4	42.06	28.54	36.26	35.54	53.54	34.14	57.93	56.34	57.74	41.4	20	60	59	33.67	57.14	45.73	59.73	60	60	53.6	56.4
88.5	60	53.4	38.74	46.2	60	54.07	59.73	40.47	43.2	59.8	40	33.54	54.46	38.46	53.47	14.34	21.46	40	49.53	40.6	58.47	59.87	58.6	59.8	20.54	57.13	57.53	23.2	35.74	53.26	58.8	57.6	25
89.5	50	22.33	54.34	45.47	60	38.93	59.2	53.2	37.87	51.13	12.46	57.6	31.13	29.53	60	30.13	41.93	55	56.33	22.93	59.07	49	29.8	59.46	46.6	37.53	35.73	59.6	60	13.4	49.33	53.13	54.07
90.5	34.13	40.66	51.27	41.66	43.27	56.54	27.66	20	50.13	31.2	40.14	18.53	15.66	41.8	33.27	37.2	46.94	43	18.8	45.46	56.87	35.93	47.13	50.33	42.4	55.4	59.46	29.87	59.54	60	40.67	13.06	45.8
91.5	46.07	34.47	22.93	38.07	14.8	36.2	29.27	40.73	21.86	57.93	26.87	44.8	49.54	29.46	8.66	29.27	10.27	15.54	41.4	15.73	47.2	43.07	33	44.6	6.87	50.87	25.93	52.8	49.4	43.94	30.53	55.07	25.74
92.5	41.07	19.34	35.67	40.07	53.87	49.26	53.2	45.86	29.66	33.34	49	15.6	32.2	27.6	24.07	35.27	46.14	36.07	42	22.8	6.06	27.07	29.14	27.93	30.67	18.47	40.33	12.47	20.86	20.8	43.07	28.34	31.07
93.5	33.67	38.06	54.6	43.93	30.93	48.73	15.54	9.13	24.53	40.27	12.8	32.66	33.47	20.27	38.26	25.14	44.87	27	23.47	24.34	49.4	47.67	46.8	28.93	42.67	48.53	20.66	46.33	39.33	34	33.13	47.26	39.06
94.5	34.66	60	9.6	40.26	36.26	59.06	32.8	42	47.2	41.87	37.54	37.14	29.27	33.93	47.8	29.34	29.8	32.4	37.8	24.4	56.47	31.13	22.6	60	25.73	20.67	46	50.66	38.67	33.87	19.13	40.53	17.53
95.5	60	24.26	57.2	31.53	59.53	50.07	34.4	24.66	31.26	38.8	28.34	49.6	30	41.33	37.73	23.53	45.4	51.8	59.66	53.87	56.06	38.2	57.8	45.93	60	48.2	42.33	60	60	59.8	60	37.14	35.33

## Sheet: Fig6-A TDW
Each value represents the amount of theta dominated waking in minutes per hour. Each column has all hourly values of one mouse across the whole (=96hrs) experiment
	WT																	KO
Time[hours]	_1WT_CIRP03	_1WT_CIRP04	_1WT_CIRP05	_1WT_CIRP09	_1WT_CIRP11	_1WT_CIRP18	_1WT_CIRP19	_1WT_CIRP29	_1WT_CIRP30	_1WT_CIRP31	_1WT_CIRP48	_1WT_TC03	_1WT_TC06	_1WT_TC08	_1WT_TC12	_1WT_TC13	_1WT_TC18	_2KO_CIRP01	_2KO_CIRP10	_2KO_CIRP13	_2KO_CIRP14	_2KO_CIRP15	_2KO_CIRP20	_2KO_CIRP25	_2KO_CIRP40	_2KO_CIRP50	_2KO_TC01	_2KO_TC07	_2KO_TC10	_2KO_TC15	_2KO_TC16	_2KO_TC17	_2KO_TC19
0.5	4.27	2.87	4.53	3.47	6.93	0.2	4.6	1.47	0.6	1.47	3.73	6.8	4.73	1.33	6.27	0.73	0.93	1.07	8.27	10.4	4.73	13.27	11.73	0	8.87	14.67	1.87	5.27	6.73	12.33	0.67	2.67	8
1.5	5.07	6.2	1.73	4.87	1.87	0.6	0.93	3.13	1.73	3.13	4.47	6.93	5.53	1.27	7.93	3.07	7.13	1.07	1	1.33	6.07	1.67	4.87	2.13	3.13	0.27	0.33	3.93	0.53	0.8	6.73	0.67	1.67
2.5	1.73	1.67	7.4	0.8	2.6	0.27	2.47	0.67	10.27	2.4	4.07	0.2	0.53	0.93	1.53	4.8	2.8	2.67	0.47	8	1.6	0.07	3	13.4	4.67	7.33	1.4	6.93	15.87	12.6	5.67	0.53	6
3.5	2.67	5.73	2.2	0.73	1	2.67	2.2	13.13	17.2	2.73	1.67	3	8.73	0.4	0.4	0.87	1.67	0.73	0.27	2.8	23.8	6.8	1.2	3	3.13	12.47	0.53	0.8	3.4	0.2	1.67	0.4	2.07
4.5	0.6	2.87	2.6	2.73	14.4	5.93	0.8	1.93	2	20.53	7.13	1.27	2.53	10.07	4.6	0.87	3.53	2	12.8	7	8	0.27	32.33	2	5.33	4.93	0.2	0	14.33	2.13	5.4	18.13	0.13
5.5	13.73	5.87	1.33	1.93	1.53	0.33	3.47	1.93	0.8	2.4	12.8	2.93	2.07	0.27	1.87	16.73	1.8	3.33	0.6	14.6	2.67	1.13	0.87	2.27	3.33	2	3.53	12.93	0.47	1.47	0.2	2.53	11.6
6.5	3.07	0.13	9.53	9.13	2.4	1.4	2.4	5.93	3.4	2.33	4.47	2.67	7.13	0.93	1	0.8	4.73	0.67	3.2	0.27	0.8	7	3.27	2.8	0.27	3.27	5.2	1	14.07	0.53	2.6	9.2	0.47
7.5	0.47	3.47	0.4	1.8	6	1.4	2.67	0.73	1.87	2.07	2.53	1.47	2.87	2.67	10.13	5.13	2.47	1.67	4.67	7.53	16.6	0.73	1.8	1	4.47	15.53	0.13	5	0.8	1.47	0.47	1.4	0.67
8.5	4.27	1.67	5.93	2.4	1.4	3	1	5.2	0.93	3.73	5.47	6.73	1	1.8	0.27	2.8	4	1.93	0.87	1.07	3.13	1.8	20.13	1.53	0.4	0.4	2.6	1.07	1.33	1.53	5.47	1.33	5.07
9.5	2.27	0.33	0.33	3.6	4.13	3.07	3.67	1.87	11.93	9.07	9.33	1.8	4.67	1	1.67	1	0.87	1.4	1.93	1.6	3.87	0.53	1.13	3.47	1.33	8.93	0.27	4.8	14.6	1.47	14.87	17.33	3.13
10.5	9.67	2.73	2.73	3.8	7.87	1.67	6.6	4.53	9.33	2.4	4.07	1.6	5.6	2.67	1.87	3.67	7.8	1.4	4.47	3.07	7.8	3.27	7.13	5.27	3.67	9.73	2.4	4.4	2.07	1.13	3.13	3.4	6.27
11.5	6.73	5.47	4	6.73	12.2	3.67	5.07	7.73	6.2	7.07	14.93	5.8	6.33	1.8	3.8	6.47	5.8	3	4.47	12.73	11.13	4.33	12.47	2.4	8	16.4	5.13	11.87	4.53	3.2	7.87	8.73	19
12.5	30.67	12.67	5.67	15.33	27.07	23.93	21.47	24.27	29.8	29.07	25.4	12.2	23.93	17.07	6.67	13.07	17.27	9.6	29.87	30.07	18.67	22.47	33.33	33.2	22.2	19.73	20.6	30.8	18.67	22.67	33.73	28.93	22.93
13.5	17.07	6.67	8.27	21.07	24.2	15.2	23.53	22.93	9.2	17.87	22.07	4.2	10.93	13.67	10.27	14.47	17.13	2.27	21.8	22.07	19	20.33	17.07	33.47	17.2	10.2	15.33	24	20.2	27.47	37.13	31.53	20.2
14.5	32.87	21	8.67	14.93	26.27	11.2	24.47	15.4	8.73	20.87	14.93	5.2	15.13	8.33	10.87	9.33	9.33	2.2	18.2	11.27	20.13	14	7.13	35.4	18.47	9.4	3.4	30.13	25.8	27.93	35.27	13.87	16.73
15.5	31.6	7	6.2	13.53	23.73	12.67	27.27	19	28.07	11.53	12.4	10.4	6.33	2.4	9.6	9.93	16.33	2.6	12.53	24.13	17.13	22.13	18.93	29.33	7.07	15.87	18.87	32.6	25.13	23.73	36.13	26.2	2.93
16.5	4.8	6.27	12.33	8.27	31	7	24.4	13.47	19.6	25.8	8.6	5.67	24.4	9.2	19.67	13.67	15.27	11	10.6	17.13	19.07	14.27	9.47	26.8	1.47	24.4	8.53	37.67	13.47	28.8	33.67	13.67	18.27
17.5	31.47	3.33	11.33	17.73	34.4	33.13	15.27	28.27	18.8	27	25.33	5.87	13.87	3.2	0.47	12.47	5.67	2.53	12.6	33.07	17.33	22.87	24.47	21.87	25	16.87	9.2	19.8	24.6	23.2	32.4	24.73	13.2
18.5	23.27	11.4	17.73	18.07	11.27	3.4	27.93	8.53	12.13	18.13	3.53	12.2	22.4	6.87	10.4	5.53	9	3.33	2.6	8.67	20.27	8	6	16.8	11.4	8.4	14.6	14.53	21.4	0.53	28.27	5.73	3.4
19.5	14	7.93	6.4	14.27	28.8	13.2	15.87	16.13	19.47	5.47	6.47	10.47	4.6	1.73	6.4	9.07	13.93	5.13	11.53	10.47	3.4	6	28.8	11.4	1.2	10.07	10.33	19.53	20.4	16.93	7.07	16	10.6
20.5	15.07	8.6	7.33	11.13	2.27	5.73	4.27	11.73	7.73	31.27	18.2	0.87	7.67	9.47	0.2	6	7.27	1.2	2	3.87	11.87	5.2	3.2	34.13	0.33	9.67	0.8	8.33	4.53	6.53	31.27	5.8	2.33
21.5	19.4	5.13	10.13	21.07	22.33	25.93	4.6	18.27	9.4	9.67	4.73	1.53	6.73	8.2	2.33	9.13	4.4	3.07	4.87	5.53	28.27	6.27	33.53	13.33	5.07	14.13	5.93	8.33	5.2	25.27	7.8	15.53	2.33
22.5	8.53	11.27	5.33	8.53	17.07	7.2	23.67	6.4	10.73	12.47	15.67	9.27	15.4	2.93	10.27	2.53	13.13	6.07	7.47	9.4	6.8	15	19.53	12.73	21.53	10.33	10	25.2	23.53	7.27	24	8.4	13.8
23.5	19.27	10.4	8.07	9.53	22.07	20.67	6.33	24.07	21.87	7.73	21	20.73	18.4	10.8	13.67	3.93	12.87	3.4	13.53	17.67	26.07	12.73	15.93	24.13	24.93	24.27	13.87	33.2	27.8	17.13	24.93	16.27	22.73
24.5	4.2	7.33	1.67	7.33	4.6	1.67	5.73	2.6	5.33	2.67	1.27	8.8	6.87	0.93	4.93	1.07	0.47	2.4	2	1.73	2.2	2.73	4.8	2.93	18.93	7.6	1.47	14.2	3.53	6.73	0.4	0.4	1.47
25.5	5.27	1.4	11.67	1.4	3.93	0.73	1.27	1.27	4	1.8	18.87	7.33	1.93	3.2	3.2	2	2	2.67	1.33	2.8	6.47	1.73	5.07	4.53	2.8	12	0.67	11.47	0.47	2.4	13.6	7.47	1.6
26.5	1.53	0.67	3.4	4.8	10.53	1.2	1.4	2.47	4.07	1.67	11.47	4.33	3.2	1.27	8.6	3.8	3.6	1.6	2.8	0.67	0.93	1.4	3.6	2.13	16.33	2.4	1.33	13.27	8.47	2.47	6.87	12.93	0.33
27.5	11.2	5.73	3.87	3.47	6.53	3.6	0.87	1.93	17.8	2.67	2	0.93	4.47	1.53	0.8	1.8	2.73	1.33	2.87	6.27	12.87	7.87	2.2	1.2	1	3.93	6.93	9.67	0.33	1.73	4.47	6.4	18.13
28.5	1.4	6.6	0.6	1.93	1.87	0.4	1.93	9.2	4.07	7.93	1.8	1.47	8.27	0.2	6.53	8.6	1	1.53	1.47	16.4	18.67	0.4	0.93	1.67	0.67	0.6	0.13	1	13.33	0.13	0.2	0.93	6.6
29.5	0.93	0.2	14.07	12.67	2.6	0.67	4.47	0.27	1	16.73	6.2	5.73	5.73	1.8	1.27	1.67	6.47	2.27	5.27	0.27	1.6	1.27	16.13	0.2	11.6	24.87	0.47	0.27	6.73	19.87	8.67	4.53	0.67
30.5	11.8	4.67	0.47	1.13	3.87	11.2	0.6	3.27	2.73	2.2	1.13	0.6	1.6	4	0.6	4.2	1	2.87	0.4	2.73	6.33	1.93	9.33	8.2	1	7.2	1.8	10.27	0.93	1.33	0.93	3.07	1.8
31.5	1.33	1.4	0.27	0.8	0.53	0.6	3.47	1.47	12.6	1.87	6.6	0.73	4	1.4	1.2	1.6	2.93	2.67	2.87	0.8	2.67	1.73	2.2	0.47	0.13	2.27	2.73	1.47	18.8	5	3.4	1.47	2.67
32.5	2.4	2.27	1.4	2.87	1.53	1.33	1.6	2.33	2.07	5.6	1.6	0.67	7	0.6	1.47	1.87	3.07	0.87	4.2	1.13	5.87	2.13	2.33	2.93	0.93	6.67	0.6	2.53	0.13	1.2	3.67	3	2.2
33.5	3.4	2.93	3.07	1.87	2.6	1.53	2.4	5.8	1.8	1.53	6.67	0.93	3.67	3.13	2.4	4.2	2.93	1.6	1	5.27	7.33	3	5.13	3.73	4.13	7.73	1.53	1.8	2.4	1.47	4.53	4.2	8.33
34.5	5.73	2.53	2.27	4.2	7.53	1.2	2.13	2.47	6.47	7.93	6.2	1.93	4.13	4.53	1.93	3.73	4.87	0.67	3.27	6	5.4	1.73	3.6	4	3.67	4.73	1.6	4.07	3.8	4.07	8.2	7.4	6.53
35.5	3	3	2.93	8	12.6	3.87	5.07	6.4	8.07	9.6	11.87	4.53	6.93	5.4	1.33	4.93	6.13	4.2	2.47	10.93	7	7.73	7.53	5.33	6.47	14.47	8.53	7.53	7.93	3.8	7.07	6.2	13.93
36.5	28.2	14	8.27	34.27	25.4	21.07	20.27	24	31	31.8	24.13	11.53	27.67	21	16.27	12.6	14.73	7.13	27.13	23.2	29	20.2	28.07	34.4	23.13	30.53	22	29.4	27.13	18.87	32.2	21.67	23.47
37.5	37.53	11.2	2.87	34	17.53	14.47	21.4	18.33	14.33	24.2	16.93	15.53	14.33	13.6	18.2	8.87	21	4.67	21.6	20.33	21.67	16.8	18.53	30.73	20.2	13.53	19.13	31.8	24.07	24.87	34.27	23.07	24.4
38.5	27.13	4.33	4.93	17.27	30.47	10.07	33.4	23.07	22.07	23.07	17.67	7.73	19.87	10.8	11.4	8.33	10.4	5.27	13.2	5.2	24.27	15	17.47	23.53	17.67	5.87	8.87	28.73	19.8	20.2	34.13	10.8	24.73
39.5	22.53	10.6	6.67	10.73	27.33	17.2	28.47	14.33	4.8	11.87	16.6	11.73	23.27	2.27	23.8	17.93	13.53	5.07	27.4	30.2	22.93	20	19.73	30.4	21.2	30.47	19.13	14.93	17.13	26.27	36.73	21.73	20.6
40.5	35.07	13.27	7.47	19.4	22.93	10.07	32	15.53	26.93	23.33	10.4	5.33	16.13	12.93	12	11.67	7.27	9.87	14.53	30.6	19	21.07	18.53	29.73	9.8	18.07	10.13	34.8	7.53	9.73	34.2	8.87	1.47
41.5	22.67	8.73	4.47	30.6	33.67	12.67	31.2	22.6	13.07	9.73	13.47	10.27	11	11.4	12.53	10.47	22.6	7.27	23.07	4.6	23.8	3.93	10.93	23.93	0.53	5.4	14.93	29.93	16.73	27.33	30.53	18.53	13.33
42.5	25.47	10	8.27	28.93	15	6.93	5.33	3.07	28.53	31.87	29.67	9.67	6.4	1.4	22.67	18.2	3.93	5.8	7.33	25.4	12.13	17.8	21.6	14.47	23.27	13.53	6.93	1.47	9.6	13.93	22.8	5.47	20.13
43.5	4.07	1.4	13.73	25.8	21.47	10.8	10.13	21.4	5.2	3.2	3.2	11.4	8.47	3.73	4.13	4.6	14.73	1.73	13.07	10.73	20.27	8.73	10.73	14.73	11.93	15.47	11.13	10.93	23.87	7.47	15.93	5.53	7.2
44.5	15.67	6.73	2.07	13.33	5.07	11.67	22.33	2.2	11.87	21.6	11.13	5	9.73	1.6	0.93	8.2	3.87	3.07	2.2	6.47	16	6.87	21	8.6	0.4	22.27	2	16.87	5.2	3.8	18.67	18.87	1.93
45.5	21.53	5.07	5.8	18.93	19.53	18.73	2.53	5.53	4.53	12.67	4.6	1.4	9.13	4.47	8.87	7.2	14.13	3.33	11.27	4.53	13.73	5	3.2	6.73	7.33	5.53	4.33	0.8	4.4	10.07	26.27	2.8	10.27
46.5	9.27	9.6	10.2	14.6	18.93	19.8	12.27	24.4	18.2	18.93	13.27	3.33	22.27	3.6	9.87	8.67	5.27	2.93	16.6	8.4	35.27	3.67	17.53	14.2	5.33	10.07	12.67	14.2	25.53	14.2	1.53	9.4	6.87
47.5	20.53	31.73	11.6	16.27	17.07	30.87	16.4	23.33	18.07	15.6	26.53	18.4	16	7.07	13.2	4.47	18.27	14.13	23.6	14.4	14.07	8.6	18.67	32.87	18.47	6.07	19.73	7.67	30.4	22.33	26.13	17.93	23.87
48.5	37.93	25.33	16.93	33.33	31.6	20.53	28.07	31.87	41.93	33.53	24.73	23	28	20.13	22.73	23.93	15.13	25.6	19.07	38	34.4	18.4	35.2	14.4	26.8	22.07	18.8	13.53	27	27.6	16.07	14.73	20.6
49.5	35.6	35.87	10.27	30.13	36.07	25.93	27.4	33.33	42.13	30.93	37.53	18.8	25.4	16.67	27.47	17.07	10.13	24.8	25	37.73	44.07	20.13	38.27	16.6	36.47	32	18.07	9.67	26.2	18.13	24.27	16.53	28.33
50.5	39.67	41.93	12.67	40.53	40.53	41.33	40.6	44.67	45.8	44.6	43.87	30.47	39.93	28.53	37.67	33.53	33.2	27.33	40.93	44.93	48.8	35.07	47.8	33.73	47.47	48.4	31.93	8.6	31.07	41.73	42.87	23.6	38.13
51.5	38.93	24.47	12.87	40.8	31.93	37.6	32.47	41.6	41.27	34.87	36.93	27.47	33.2	34.73	37.93	39.53	26.8	33	32.2	36.53	39.6	23.13	43.53	30.47	42.8	43.53	35.8	14.93	42.27	42.67	36.2	29.07	38.47
52.5	23.73	21.73	13	34.47	26.87	27.07	26.47	31.73	31.87	26.27	31.53	25.13	30.87	26.2	24.8	30.53	19.6	26.4	22.27	31.87	37.27	25.93	30.93	23.93	46	38	28.73	20.87	30.13	35.2	26.53	18.67	26.67
53.5	35.4	37.67	19.67	24.87	25.07	41	38.4	43.33	40	35.8	38.13	25.13	39.73	36.07	29.87	35.4	35.6	30.8	17.73	35.93	42.93	35.13	39	36.8	40.73	45.67	33.2	22.6	33.4	40.33	38.67	27.27	39.27
54.5	4.4	13.53	9.87	0.93	7	6.33	9.67	10.4	14.73	7.4	6.8	13.13	6.67	12.6	3.47	3.67	5.8	15.6	2.27	6.73	3.8	4.6	15.67	15.27	14.67	14.87	10.33	11.67	2.6	3.4	14.33	4.73	4
55.5	12.2	9.93	6.67	3.67	2.6	6.67	4.87	9.73	5.8	3.53	4.33	3.6	3.13	4.8	0.8	0.8	3.07	3.6	0.87	8.07	1.67	0.4	2.8	0.07	7.33	13.13	0.33	7.27	2.67	1	3.13	2.13	2
56.5	3.13	2.33	9	7.53	3.53	7.8	2.53	0.27	0.73	3.8	3.87	5.93	6.53	6.93	1.67	3.4	4.47	15.73	1.27	6.27	8.73	3.2	13.27	2	4.2	9.13	4.87	13.33	5.2	3.8	4.53	2.87	4.87
57.5	10.87	2.67	13.6	3.07	2.87	3	3.27	6	7.2	2.6	3.2	2.33	3.67	9.4	1.13	3.73	6.13	9.33	1.27	3.07	5.13	3.87	3.73	3.33	4.13	3.27	3.53	7.33	2.27	0.47	10.87	4.73	1.27
58.5	15.93	7.87	1.87	8.33	2.93	3.13	1.4	1.27	4.67	1.6	3.67	3.6	7.07	1	12.33	1.2	6.27	6.73	1.13	3.47	12.87	2.93	7.47	2.53	5.73	4.13	3.6	3	15.07	3.13	6.93	7.93	9.07
59.5	9.87	11	5.8	16.33	7.93	3.33	2.93	6.93	4.13	7.2	10.2	5.13	7.6	3.93	4	2.73	6.27	3.07	1.47	7.2	12.4	4.4	14.93	1.53	12.13	10.53	2.53	6.13	7.8	3.2	11.33	7.53	7.67
60.5	33.8	15.33	7.2	32.53	21.53	17.53	23.27	25.07	33.53	35.93	26.47	14.93	26.6	21.4	20.67	11.87	20.8	13.8	10.2	26.2	43.53	17	28.67	24.47	24.13	33.93	18.93	17.87	23.33	19.67	36.93	21.73	29.33
61.5	25.93	6.8	3.87	12.87	24.73	13.87	9.13	15.4	15.13	34.73	9.67	7.53	22.07	14.87	21.53	6.53	12.2	8.6	6.47	22.53	40.47	11.4	12	26.07	13	21.73	8.87	11.07	28	23.47	37.07	20.07	29.2
62.5	19	7.33	2.73	23.33	25.8	13.93	16.67	17.33	4.07	27.93	12.27	11.13	10	14.67	9.53	8.33	10.4	10.73	9.73	15.93	40.4	10.73	40.6	21.33	21.47	16.33	6	25.47	18.47	27	37	15.53	26
63.5	28.8	9.8	6.67	4.8	17.87	17	15.33	29.07	28.2	26.67	19.33	8.33	10.47	2.2	3.27	8.13	6.4	7.93	18.6	12.87	27.4	27.33	7.33	13.27	25.13	10.13	19	31.07	35.07	27.33	32.27	20.67	3.47
64.5	40.33	3.87	3.6	20.07	30.33	4.27	18.93	27.33	32.73	27.47	5.47	6.53	18.67	2.53	22.07	15.6	14.27	6.53	22.93	27.47	31.8	4.8	17.6	18.87	0.73	25.33	5.8	38.33	8.33	7.4	23.47	20.47	13.6
65.5	43.73	12.27	15.4	13.93	26.8	23.53	33.2	3.07	33.13	13.6	4	23.07	8.6	19.87	15.07	9	2.33	25.6	8.6	8.13	33.2	22.53	20.67	25.67	12.4	23.4	13	15.4	15.07	22.8	21.6	5.53	26.73
66.5	38.27	28.73	9.47	31.53	26.33	23.07	12.4	17.27	11.4	24.87	14.67	3.27	4.87	4.93	4.33	6.53	6.2	35.53	11.27	21.53	19.13	14.93	26.6	25.8	14.73	13.47	24.2	3	33	33.87	5.93	5.93	11.07
67.5	19.93	2.87	4.4	9.73	11.87	3.27	10.67	27.27	3.4	18.07	3.47	2.27	6.53	1.47	1.33	13.93	1.87	13.4	10.13	2.93	13.07	0.07	10.07	11.53	1.13	6.07	9.87	27.87	6.07	1.93	30.47	21.8	3.07
68.5	4.27	4.4	6.87	18.2	6.87	13.4	29.47	1.13	17.47	7.87	6	3.6	4.27	1.27	12.53	4.8	12.53	0.87	0.53	17.53	39.07	11.53	10.07	3.6	4.87	5.33	0.8	13.47	7.27	3.2	2.47	5.27	0
69.5	29.67	4.67	21.6	9.4	22.07	14.8	7.67	4.93	8	25.87	7.53	4.87	9.73	1.87	3.67	2	7.73	6.33	7	5.07	18.4	18.4	8.33	23.87	1.07	25.07	11.93	3.6	17.47	9.07	25.73	4.53	15
70.5	4.8	5.4	10.53	22.87	25.4	10.6	2.2	28.73	7.93	14.4	4.87	14.53	17.73	5.73	8.2	7.73	15.93	3.6	5	3.8	13.33	6.33	15.8	33.87	15.27	14.27	8.73	19	23.93	8	23.07	4.8	14.47
71.5	23.53	29.2	12.87	18.27	11.2	35.73	20.07	18.07	7.6	22	26.6	30.6	24.27	17.67	21.2	2.73	13.53	22	37	18.07	42.07	21.4	44.47	23.27	25.8	23.73	27.4	42.33	19.73	35.8	23.2	17.13	29
72.5	1.53	4.8	2.2	9.4	4.27	2.33	3.8	0.73	2.73	1.2	3.67	10.73	3.87	12.8	3.87	0.73	0.67	10.2	7.6	30.13	16.2	2.53	8.73	0.27	9.87	12.53	7.8	36.67	17.13	8.4	8.8	10.73	3.4
73.5	2.33	7	8.07	3.67	0.4	1.4	4.73	5.87	26.87	5.4	5.67	5	8.33	6.33	20.33	2.4	2.4	2.47	2.53	6.73	3.6	0.93	2	3.47	21.07	4.07	0.73	24.2	0.4	0.13	2.13	0.33	0.87
74.5	4.53	4.33	0.53	6.6	13.8	2	1.13	3.13	25.07	0.87	2.87	0.47	6.07	1.47	0.47	0.2	3.33	7.27	2	7.4	5.6	1.87	6.73	12	4.47	0.93	3.33	1.73	4.13	5.4	3.07	4.2	6.33
75.5	6.13	13.87	8.33	8.53	0.4	5.07	8.67	0.87	5.33	4.47	4.73	3.13	21.2	1.67	9.8	5.73	0.33	3.53	6.2	10.47	1.6	8.67	3.73	8.73	0.2	15.4	3.2	3.13	3.07	0.27	12.4	9.6	3.07
76.5	19.27	5.13	1.33	6.2	22.13	21.2	3.27	16.33	3.93	5.2	4.53	10.13	10.33	17.13	0.73	4	9.4	2.93	5.93	8.2	34.6	4.27	0.67	4.2	10.73	20.6	5.53	0.47	13.87	14.6	2.4	3.87	12.27
77.5	1.13	20.73	0.4	1.33	0.33	0.47	10.8	3.93	1.33	29	13.13	4.67	3.8	2.93	3.2	2.8	1.07	23.4	5.93	2.07	1.2	3.6	25.2	8	0.27	7.8	1.47	13.8	7.2	0.53	1.4	17.93	1.27
78.5	16.07	0.8	6.6	9.8	3.27	11.27	1.07	5.87	2.73	10.27	13.8	1.2	2.73	1.93	2.67	4.87	7.2	2.47	1.53	4.33	7.67	6.27	0.53	0.87	6.13	23.27	1.27	1.4	4.93	10.53	5.73	3.33	5.07
79.5	1.13	6.27	0.4	3.53	2.27	2.6	7	5.8	10.33	3.4	1.8	1.07	8.07	8.33	1.27	3.93	0.27	7.93	2.33	2.33	2.87	1.27	2.87	11.33	1.4	6.07	1	6.33	8.87	0.4	1.6	2.67	2.27
80.5	2.33	1.2	2.2	10.07	4.53	0.8	0.8	4.13	1.53	9.33	4.07	1.13	0.73	6.07	2.07	2.07	3.93	4.6	5.2	6.8	10.6	2.4	5.67	4.53	3.47	9.4	8.2	2.07	7.13	1.87	13.67	0.8	4.27
81.5	3.33	11.2	8.53	6	1.73	3.67	1.93	2.33	13.47	5	3.73	0.73	9.87	5.87	1	2.87	7.27	1.2	3	2.73	3.67	1.8	6.8	2.07	7.8	3.67	1.13	6.2	4.73	0.27	1.6	8	5.33
82.5	4.13	7.07	4.93	4.8	8.93	2.93	5.8	9	7.53	16.33	13.13	2.87	6.47	10.87	3.8	5.07	2.33	4.87	2.67	8.53	19.07	1.53	11.2	11.53	11	9.8	2.8	8.4	12.73	4.33	6.67	2.73	5.2
83.5	8.87	15	2.2	7.27	6.53	4	4.8	8.33	6.93	10.4	5.8	4.67	12	3.47	9.07	6	8.93	5.87	3.87	6.87	12.93	6.6	6.53	8.27	18	10.73	5.6	15.07	8.73	6.67	16.73	8.4	10.93
84.5	37.33	22.87	6.93	34.2	36.87	22.27	29.33	27.13	30.93	36.93	31.27	26	32.07	22.93	24.33	16.73	29.87	19.6	30.2	35.67	38.87	22.8	37.73	44.4	33.93	28.87	27.47	42.2	39.6	30.27	33.2	15.47	30
85.5	30.73	24	5.87	17.2	31.8	29.67	33.6	23.8	22.47	36.93	11.4	18.4	24.73	17.8	30.87	10.47	30.13	13.2	25.6	22.67	37.13	19.47	37.27	42.67	30.93	16.67	24.93	31.73	33.4	19.87	35.73	14.33	22.73
86.5	18.2	7.73	4.47	9.27	30.47	22.2	28.8	26.13	17.47	27.6	19	12.2	14.07	8.93	27.33	10.6	6.6	9.53	27.33	16.07	35.67	23.07	20.27	40.87	32.33	27.47	13.6	37.33	31.53	24	34.47	11	24.47
87.5	31.33	12.07	4.13	23.67	14.47	12.07	27.53	21.13	27.73	33.2	14.33	10.73	17.53	5.47	12.13	10.07	20.67	13.67	18.13	29.27	34.07	11.07	5.67	40.6	31	10.07	24.87	28.73	28	29.6	33.73	15.67	18.33
88.5	35	25.87	10.47	17.8	38.53	29.07	36	16.8	19.93	41.27	13.27	8.07	26.13	7.93	19.8	2.87	6.53	14.2	23.6	17.73	36.67	25.8	29.53	40.6	2.87	34	23	7.8	16.27	26.33	33.8	18.27	3.2
89.5	28.6	5.8	18.27	21.87	35.07	14.4	35.93	26.47	13.8	24.13	1.33	17.4	11.33	7.8	26.33	6.93	14.93	28.13	25.2	6.73	34.4	13.73	15.67	38.73	21.6	15.33	10.93	32.2	32.73	2.73	22.33	18.53	18.87
90.5	10.33	19.73	22.2	17.53	21.4	32.87	5.73	3.33	24.13	12	15.07	2.53	3.33	9.93	10.07	11.07	20.67	18.73	2.07	21.53	31	9	22.73	24.73	19.53	29.93	21.93	6.87	36.47	30.6	19.2	1.73	16.8
91.5	24.67	14.27	4.4	12.4	2.6	15.93	11.4	17.13	8.13	34.6	7.47	11.33	18.87	4.53	0.73	4.2	2.07	3.87	16.33	3.2	25.67	12.6	19.33	21.07	0.47	21	2	24.27	28.27	20.87	11.8	23	5.67
92.5	14.2	3.87	9	13.8	27.27	22.73	26.47	19.93	9.73	11.47	16	1.6	15.47	2.73	1	8.6	17.07	9.6	14.47	6.27	0.93	8.8	8.67	10.93	8.07	4.87	13.2	1.27	6.93	4.53	22.27	12.47	10.87
93.5	17	12.93	17.2	17.13	11.73	22.93	3.87	1.2	7.93	19.2	1.93	4.73	11.07	1.6	12.93	4.67	17.4	3.93	3.6	4.67	26.67	14.2	24.73	9	15.87	22.2	3.73	19.8	18.33	12.73	11.4	16.13	7.13
94.5	11.93	38.2	1.47	15.13	17.93	35.53	12.47	17.53	24.2	23.6	13.07	10.87	8.4	10	20.33	4.67	10.13	6.93	14.13	8.33	31.47	5.73	7.6	36.93	8.73	7.27	12.8	19.33	19.2	6.47	6	16.93	2.2
95.5	40.4	9.73	19	10.33	32.93	30.47	11	6.53	12.33	17.93	9.67	25.27	10.47	10.53	11.73	4.53	18.27	26.87	29.53	30.8	28.73	10.87	35.53	26.2	33.53	24.2	15.4	34.47	37.87	29.6	32.87	16.07	11.8

## Sheet: Fig6-B Spectra TDW Dark BL
Each value represents the relative amount of power in a given frequency bin (column A); the data is normalized against a weighted reference as described in material and methods. Each column represents one individual mouse.
	WT																				KO
Freq(Hz)	_1WT_NO_CIRP03	_1WT_NO_CIRP04	_1WT_NO_CIRP05	_1WT_NO_CIRP09	_1WT_NO_CIRP11	_1WT_NO_CIRP18	_1WT_NO_CIRP19	_1WT_NO_CIRP29	_1WT_NO_CIRP30	_1WT_NO_CIRP31	_1WT_NO_CIRP48	_1WT_YS_TC03	_1WT_YS_TC06	_1WT_YS_TC08	_1WT_YS_TC09	_1WT_YS_TC12	_1WT_YS_TC13	_1WT_YS_TC18	_1WT_YS_TC21	_1WT_YS_TC22	_2KO_NO_CIRP01	_2KO_NO_CIRP10	_2KO_NO_CIRP13	_2KO_NO_CIRP14	_2KO_NO_CIRP15	_2KO_NO_CIRP20	_2KO_NO_CIRP25	_2KO_NO_CIRP40	_2KO_NO_CIRP50	_2KO_YS_TC01	_2KO_YS_TC07	_2KO_YS_TC10	_2KO_YS_TC15	_2KO_YS_TC16	_2KO_YS_TC17	_2KO_YS_TC19	_2KO_YS_TC20
0.75	0.6735	1.0105	0.855	1.9745	0.8005	1.507	0.7315	0.565	0.7455	0.8575	0.685	0.828	0.8395	0.732	0.9095	0.9095	0.7555	0.705	0.543	0.6985	0.755	0.743	0.7345	1.561	1.1605	0.8345	1.4015	0.7145	0.585	0.797	0.786	0.8855	0.8995	0.7765	2.3315	0.6815	0.8755
1	0.882	1.2225	1.2085	1.941	0.9	1.7605	1.0805	0.778	0.9225	0.838	0.872	0.937	1.001	1.047	1.0265	1.055	0.8775	1.0195	0.7855	0.9305	0.915	1.078	0.9515	1.986	1.3805	1.027	1.334	1.036	0.8005	1.019	0.9055	1.0465	0.9935	0.762	2.371	0.9205	1.1815
1.25	1.0395	1.285	1.371	1.8715	1.1175	1.9195	1.2865	1.015	1.1035	0.943	0.9935	1.0305	1.1335	1.266	1.0795	1.128	0.908	1.2695	0.947	1.0905	1.034	1.3965	1.172	2.336	1.5745	1.249	1.352	1.384	1.026	1.168	1.0165	1.1635	1.1055	0.7695	2.135	1.1235	1.431
1.5	1.0965	1.259	1.3705	1.703	1.2285	1.9555	1.3985	1.179	1.198	1.064	1.1055	1.1175	1.0975	1.3445	1.1435	1.1405	0.9125	1.185	1.0285	1.1265	1.1365	1.4975	1.3015	2.5135	1.6205	1.3155	1.273	1.5355	1.1055	1.285	1.0855	1.229	1.194	0.7855	1.829	1.285	1.4255
1.75	1.07	1.2135	1.3435	1.5435	1.233	2.0025	1.419	1.2295	1.279	1.0335	1.09	1.1355	1.0305	1.2465	1.119	1.0665	0.853	1.153	0.9795	1.0265	1.094	1.4415	1.3155	2.3625	1.5385	1.31	1.128	1.635	1.1185	1.2165	1.065	1.2485	1.2065	0.8	1.533	1.289	1.335
2	1.0155	1.2195	1.435	1.48	1.198	2.001	1.3685	1.2295	1.227	0.9955	1.03	1	0.958	1.159	1.0515	0.976	0.807	1.064	0.9205	0.9355	1.018	1.298	1.251	1.9925	1.404	1.243	0.982	1.608	1.087	1.2155	0.9965	1.1595	1.1525	0.756	1.3	1.2305	1.1805
2.25	0.9815	1.186	1.4085	1.47	1.108	1.921	1.3425	1.151	1.188	0.9685	1.0235	0.9795	0.8935	1.1125	1.005	0.8895	0.7615	1.0515	0.8755	0.8545	1.1325	1.2205	1.2375	1.7945	1.3025	1.1555	0.889	1.61	1.029	1.227	0.937	1.1085	1.0705	0.7335	1.206	1.1715	1.1
2.5	0.908	1.2	1.3425	1.386	1.07	1.732	1.2415	1.115	1.105	0.8845	0.9825	0.933	0.8215	1.0905	0.946	0.8025	0.7115	1.0335	0.8315	0.7825	1.1355	1.1415	1.179	1.6435	1.158	1.0255	0.8135	1.5695	0.9725	1.197	0.8555	1.0665	1.005	0.699	1.061	1.109	0.9615
2.75	0.824	1.144	1.1845	1.379	0.9795	1.525	1.1755	1.0495	1.019	0.883	0.9285	0.907	0.7805	1.0085	0.908	0.767	0.76	0.9935	0.792	0.717	1.2375	1.037	1.0645	1.4595	1.0935	0.941	0.7615	1.4505	0.8745	1.0715	0.735	1.0055	0.9	0.658	0.927	0.994	0.913
3	0.8105	1.159	1.086	1.4085	0.928	1.372	1.1135	1.003	0.9655	0.846	0.8865	0.841	0.7065	0.9245	0.8565	0.712	0.7325	0.9805	0.7785	0.6425	1.225	0.97	0.9755	1.265	1	0.9	0.685	1.3405	0.835	0.941	0.6975	0.8955	0.821	0.606	0.8345	0.9175	0.7975
3.25	0.755	1.0945	1.035	1.2425	0.8655	1.2585	0.9985	0.9095	0.916	0.7835	0.8495	0.7975	0.6575	0.795	0.8025	0.619	0.658	0.8805	0.7005	0.5985	1.127	0.8705	0.887	1.151	0.8255	0.8235	0.628	1.1885	0.7895	0.873	0.6225	0.8185	0.739	0.5565	0.7625	0.835	0.6965
3.5	0.703	0.942	0.851	1.0835	0.7715	1.0845	0.917	0.829	0.8285	0.7185	0.744	0.664	0.575	0.6985	0.752	0.5205	0.6045	0.7665	0.623	0.555	0.9475	0.7195	0.793	1.032	0.7185	0.757	0.5735	1.0735	0.732	0.7875	0.5825	0.7115	0.66	0.516	0.6725	0.6995	0.622
3.75	0.6635	0.9515	0.7965	1.027	0.746	0.9815	0.9025	0.767	0.785	0.704	0.709	0.5955	0.5725	0.657	0.729	0.5035	0.607	0.7715	0.6095	0.535	0.853	0.655	0.718	0.94	0.686	0.702	0.544	0.987	0.7295	0.7325	0.567	0.66	0.61	0.4995	0.628	0.675	0.529
4	0.6345	0.9605	0.8135	0.9995	0.706	0.906	0.8795	0.74	0.7715	0.6955	0.6805	0.5865	0.576	0.6875	0.7	0.5125	0.563	0.7435	0.6095	0.5105	0.875	0.6325	0.6965	0.9165	0.64	0.669	0.538	0.949	0.7285	0.727	0.539	0.6375	0.6185	0.474	0.629	0.64	0.528
4.25	0.6295	0.9155	0.8395	0.988	0.692	0.8885	0.87	0.714	0.7485	0.675	0.6475	0.563	0.551	0.6785	0.6655	0.5215	0.5315	0.726	0.5925	0.4905	0.8175	0.6245	0.6815	0.8275	0.6055	0.6695	0.528	0.9065	0.6985	0.701	0.5105	0.609	0.583	0.4695	0.6035	0.621	0.5365
4.5	0.605	0.867	0.761	0.9375	0.696	0.888	0.887	0.7	0.7125	0.6685	0.597	0.5195	0.554	0.695	0.65	0.513	0.5335	0.71	0.5795	0.491	0.82	0.5915	0.6785	0.8135	0.585	0.6485	0.515	0.8635	0.67	0.683	0.5165	0.5875	0.5675	0.4585	0.578	0.591	0.513
4.75	0.602	0.8945	0.708	0.9225	0.691	0.8825	0.88	0.686	0.6895	0.6295	0.617	0.547	0.5555	0.65	0.68	0.523	0.529	0.734	0.566	0.4905	0.788	0.565	0.636	0.788	0.568	0.636	0.5095	0.841	0.668	0.671	0.528	0.56	0.5575	0.4485	0.5755	0.5505	0.5125
5	0.5935	0.863	0.74	0.89	0.682	0.8485	0.854	0.686	0.7025	0.6405	0.6445	0.5365	0.5495	0.622	0.689	0.552	0.532	0.691	0.5855	0.486	0.789	0.56	0.639	0.7755	0.5795	0.631	0.525	0.8125	0.64	0.694	0.538	0.5515	0.561	0.447	0.5555	0.5775	0.5165
5.25	0.584	0.8855	0.697	0.902	0.699	0.8205	0.845	0.676	0.701	0.658	0.6205	0.4945	0.533	0.614	0.7	0.543	0.5325	0.6645	0.5895	0.519	0.734	0.568	0.648	0.7875	0.564	0.6295	0.537	0.837	0.661	0.6985	0.535	0.546	0.5685	0.4425	0.553	0.602	0.5365
5.5	0.611	0.9245	0.7315	0.973	0.7215	0.829	0.8775	0.689	0.7105	0.6705	0.6225	0.4675	0.548	0.6265	0.676	0.5195	0.5185	0.642	0.5985	0.5045	0.767	0.603	0.6315	0.7855	0.57	0.6485	0.5365	0.833	0.6965	0.693	0.5465	0.5575	0.5955	0.4405	0.598	0.6095	0.5165
5.75	0.645	0.937	0.7	1.0075	0.725	0.88	0.9205	0.7335	0.751	0.6925	0.6155	0.4865	0.5545	0.6325	0.709	0.558	0.5195	0.7335	0.6185	0.5105	0.8965	0.61	0.6555	0.782	0.6085	0.6785	0.5525	0.819	0.716	0.6995	0.553	0.5415	0.588	0.465	0.61	0.6235	0.5025
6	0.6625	1.034	0.7485	1.0105	0.747	0.884	0.9445	0.746	0.8	0.706	0.629	0.4985	0.5855	0.632	0.772	0.548	0.5305	0.74	0.6515	0.5635	0.8895	0.593	0.666	0.808	0.6195	0.714	0.582	0.87	0.7485	0.709	0.572	0.54	0.6125	0.4765	0.6115	0.653	0.539
6.25	0.722	1.116	0.7665	1.018	0.808	0.9475	1.007	0.783	0.8215	0.7425	0.662	0.498	0.618	0.71	0.828	0.553	0.5675	0.7885	0.69	0.5935	1.0205	0.6155	0.695	0.8535	0.641	0.754	0.6125	0.8745	0.772	0.733	0.591	0.5345	0.6505	0.4885	0.681	0.6915	0.56
6.5	0.8295	1.2885	0.916	1.097	0.9075	1.066	1.167	0.8775	0.9125	0.8235	0.7535	0.545	0.6955	0.8305	0.8945	0.6585	0.6325	0.917	0.8	0.6335	1.141	0.6855	0.747	0.894	0.696	0.901	0.6715	0.9795	0.8115	0.836	0.667	0.5925	0.716	0.5275	0.761	0.76	0.6125
6.75	1.0805	1.9975	1.2735	1.432	1.1645	1.3995	1.52	1.0735	1.1825	0.97	0.9375	0.633	0.8355	1.0425	1.0675	0.792	0.792	1.1355	0.9575	0.793	1.539	0.835	0.911	1.053	0.87	1.196	0.8035	1.2385	0.9955	0.987	0.8125	0.6775	0.9305	0.6265	0.929	0.9575	0.7575
7	1.206	2.5125	1.49	1.5715	1.36	1.654	1.7475	1.263	1.3275	1.0645	1.0825	0.717	0.9255	1.208	1.2205	0.9395	0.8805	1.3135	1.097	0.926	1.8075	0.9345	1.0365	1.1525	1.031	1.3755	0.9405	1.422	1.1105	1.096	0.9345	0.71	1.1055	0.7045	1.065	1.0805	0.817
7.25	1.3055	2.8405	1.6595	1.7415	1.505	1.816	1.971	1.42	1.493	1.144	1.2025	0.7685	1.057	1.294	1.353	1.0285	0.96	1.449	1.1955	1.0015	2	1.067	1.161	1.2965	1.1385	1.5715	1.051	1.602	1.206	1.247	1.0235	0.7665	1.22	0.7565	1.2595	1.147	0.801
7.5	1.557	2.9905	1.6135	1.914	1.6385	1.9715	2.2735	1.57	1.663	1.2875	1.308	0.856	1.1465	1.3935	1.4465	1.107	1.057	1.5675	1.366	1.1945	2.36	1.2225	1.3405	1.357	1.1585	1.749	1.1385	1.749	1.3325	1.354	1.1605	0.84	1.303	0.827	1.375	1.259	0.859
7.75	1.7505	3.2235	1.9	2.061	1.7665	2.2115	2.702	1.732	1.8565	1.4125	1.372	1.0155	1.244	1.519	1.715	1.292	1.161	1.6925	1.5595	1.3305	2.4335	1.3835	1.4545	1.5365	1.293	2.0005	1.2795	1.945	1.41	1.5185	1.303	0.923	1.426	0.881	1.4695	1.4195	0.938
8	1.9275	3.29	1.7515	2.2435	1.885	2.4625	2.8265	1.8985	2.0855	1.5315	1.5475	1.349	1.4505	1.7205	2.0415	1.4845	1.339	1.8805	1.693	1.5075	2.561	1.4335	1.5825	1.7875	1.4355	2.1495	1.476	2.101	1.605	1.733	1.383	1.0885	1.5395	0.986	1.6025	1.546	1.007
8.25	2.106	3.1565	1.6155	2.366	1.998	2.559	2.8015	1.9735	2.2355	1.7	1.632	1.2475	1.51	1.6925	2.0805	1.228	1.3635	1.8535	1.8375	1.6	2.2315	1.543	1.7605	1.9855	1.518	2.1105	1.542	2.189	1.7195	1.7825	1.4405	1.201	1.614	1.095	1.724	1.5725	0.983
8.5	2.104	2.591	1.6245	2.4145	1.9285	2.6385	2.6185	1.9875	2.263	1.853	1.635	1.3405	1.5695	1.657	2.231	1.277	1.4875	1.802	1.906	1.61	1.777	1.6015	1.843	2.1725	1.5525	2.0715	1.623	2.1535	1.8935	1.7945	1.5015	1.353	1.548	1.122	1.8305	1.571	1.0105
8.75	2.0205	2.042	1.4485	2.4825	1.845	2.5325	2.3135	1.949	2.231	2.019	1.602	1.4165	1.634	1.5575	2.377	1.207	1.5715	1.7455	1.773	1.615	1.554	1.6575	2.008	2.396	1.509	1.8335	1.666	2.1	1.93	1.5725	1.6155	1.484	1.5045	1.155	1.829	1.522	1.1105
9	1.8395	1.6685	1.2095	2.2875	1.7605	2.191	1.9865	1.7365	2.0765	1.9925	1.551	1.3435	1.6	1.4165	2.3815	1.103	1.414	1.525	1.521	1.571	1.122	1.525	2.0755	2.553	1.43	1.566	1.6115	1.9305	1.8935	1.4055	1.5595	1.568	1.3385	1.1465	1.7465	1.3475	1.105
9.25	1.55	1.284	0.9255	1.9005	1.6275	1.8475	1.6025	1.5045	1.812	1.835	1.392	1.207	1.521	1.3115	2.248	1.0025	1.2085	1.2665	1.3255	1.3785	0.886	1.357	1.9095	2.433	1.409	1.3255	1.4265	1.578	1.8025	1.271	1.437	1.504	1.1265	1.115	1.5815	1.192	1.1135
9.5	1.2495	0.9995	0.809	1.5645	1.4465	1.5805	1.2205	1.262	1.459	1.58	1.147	1.112	1.4125	1.075	2.036	0.8995	1.1105	1.0455	1.1245	1.2255	0.7085	1.1445	1.621	2.214	1.2815	1.0985	1.2355	1.3665	1.684	1.1365	1.3015	1.325	0.965	1.025	1.3635	1.032	1.1755
9.75	1.072	0.766	0.68	1.328	1.2215	1.242	0.997	1.0765	1.182	1.3915	0.9295	0.982	1.29	0.912	1.7345	0.781	0.98	0.867	0.886	0.9755	0.593	0.9105	1.4095	2.0925	1.0915	0.8845	1.031	1.1015	1.514	0.9745	1.12	1.168	0.7915	0.9375	1.1495	0.871	1.0525
10	0.8605	0.6165	0.532	1.0805	1.0845	1.0395	0.837	0.912	0.967	1.2295	0.7765	0.8115	1.094	0.7525	1.378	0.642	0.7885	0.705	0.6855	0.8055	0.522	0.809	1.1955	1.714	0.9325	0.719	0.88	0.887	1.338	0.799	0.936	0.989	0.6585	0.866	0.939	0.7485	0.883
10.25	0.68	0.515	0.4525	0.8745	0.942	0.86	0.7	0.755	0.8055	1.0425	0.607	0.6965	0.8875	0.627	1.102	0.552	0.6035	0.594	0.573	0.663	0.3875	0.6995	0.9885	1.4025	0.8055	0.6055	0.732	0.713	1.064	0.6765	0.786	0.8115	0.562	0.793	0.79	0.6395	0.694
10.5	0.581	0.454	0.3915	0.734	0.817	0.733	0.569	0.619	0.69	0.815	0.5165	0.575	0.7125	0.5105	0.9145	0.474	0.468	0.507	0.4815	0.532	0.3235	0.5885	0.803	1.1165	0.6685	0.5285	0.636	0.6	0.9045	0.579	0.6705	0.657	0.464	0.7035	0.6445	0.5125	0.624
10.75	0.49	0.396	0.373	0.6305	0.679	0.646	0.4705	0.5425	0.563	0.679	0.4445	0.4425	0.6245	0.445	0.764	0.3975	0.418	0.433	0.4115	0.436	0.304	0.494	0.662	0.8935	0.554	0.458	0.5435	0.531	0.813	0.497	0.553	0.528	0.392	0.582	0.5645	0.4405	0.493
11	0.4095	0.354	0.3155	0.5295	0.556	0.5375	0.4195	0.4545	0.4935	0.587	0.383	0.375	0.5135	0.393	0.6395	0.3565	0.3675	0.3725	0.35	0.377	0.2825	0.394	0.5785	0.729	0.477	0.4085	0.449	0.453	0.6795	0.422	0.49	0.456	0.3435	0.5025	0.4675	0.4185	0.394
11.25	0.355	0.3105	0.288	0.436	0.4715	0.4625	0.3745	0.4155	0.4195	0.485	0.336	0.3305	0.4615	0.368	0.5325	0.3055	0.3335	0.34	0.3035	0.3455	0.2685	0.3235	0.517	0.603	0.4075	0.3505	0.398	0.3875	0.5765	0.361	0.4155	0.368	0.2945	0.4295	0.418	0.37	0.338
11.5	0.312	0.29	0.2595	0.3955	0.3965	0.4415	0.33	0.376	0.3745	0.414	0.3005	0.3075	0.3975	0.3135	0.4525	0.276	0.2855	0.311	0.262	0.306	0.234	0.2845	0.4535	0.519	0.3625	0.3195	0.349	0.345	0.4975	0.3225	0.364	0.312	0.2615	0.363	0.3895	0.3425	0.287
11.75	0.278	0.271	0.2425	0.371	0.35	0.3825	0.291	0.3285	0.3275	0.361	0.273	0.26	0.349	0.273	0.4035	0.2645	0.2325	0.281	0.2355	0.2635	0.194	0.251	0.392	0.4455	0.325	0.297	0.3125	0.312	0.44	0.2805	0.3205	0.272	0.2365	0.308	0.3445	0.301	0.253
12	0.2625	0.2555	0.2245	0.332	0.316	0.357	0.2635	0.3015	0.29	0.3335	0.247	0.2335	0.312	0.251	0.364	0.2345	0.214	0.239	0.213	0.2465	0.2	0.243	0.338	0.38	0.294	0.263	0.283	0.2855	0.384	0.25	0.288	0.2465	0.2215	0.2655	0.291	0.263	0.24
12.25	0.2425	0.242	0.211	0.2955	0.284	0.3265	0.2415	0.2745	0.266	0.296	0.2345	0.2265	0.3005	0.237	0.338	0.2085	0.199	0.23	0.198	0.2295	0.196	0.2225	0.316	0.342	0.2595	0.2435	0.244	0.272	0.3445	0.225	0.2615	0.225	0.2015	0.243	0.279	0.248	0.22
12.5	0.221	0.226	0.1985	0.2795	0.261	0.2925	0.23	0.251	0.242	0.257	0.2185	0.2115	0.2685	0.2155	0.2975	0.191	0.2005	0.226	0.179	0.2065	0.1875	0.1985	0.274	0.317	0.241	0.226	0.22	0.2525	0.324	0.214	0.2415	0.208	0.187	0.2255	0.2545	0.2215	0.208
12.75	0.2055	0.21	0.1855	0.2665	0.2395	0.263	0.2025	0.2325	0.2285	0.23	0.205	0.201	0.2535	0.2145	0.2765	0.18	0.1885	0.2215	0.176	0.19	0.173	0.182	0.2475	0.2795	0.2215	0.215	0.2045	0.2245	0.2935	0.207	0.2195	0.194	0.1735	0.2025	0.2315	0.209	0.1835
13	0.1895	0.196	0.176	0.246	0.224	0.2515	0.1885	0.215	0.211	0.216	0.1875	0.196	0.229	0.1895	0.262	0.185	0.1655	0.199	0.1625	0.182	0.157	0.1665	0.2225	0.255	0.207	0.197	0.1865	0.221	0.2735	0.1885	0.2065	0.1805	0.161	0.1825	0.216	0.1985	0.17
13.25	0.184	0.199	0.166	0.235	0.213	0.24	0.187	0.213	0.1945	0.2025	0.1755	0.1735	0.2245	0.1955	0.237	0.171	0.155	0.1845	0.151	0.1765	0.1495	0.158	0.213	0.238	0.196	0.1895	0.18	0.2105	0.254	0.187	0.1925	0.163	0.1495	0.1735	0.2045	0.201	0.1675
13.5	0.178	0.188	0.163	0.219	0.207	0.219	0.1775	0.2055	0.1915	0.192	0.166	0.169	0.218	0.1885	0.228	0.1635	0.152	0.183	0.148	0.169	0.15	0.156	0.204	0.23	0.179	0.1845	0.1735	0.197	0.2385	0.1735	0.182	0.1495	0.1465	0.164	0.199	0.183	0.1585
13.75	0.1665	0.1765	0.1475	0.2035	0.194	0.204	0.173	0.197	0.1755	0.1795	0.1605	0.151	0.2095	0.172	0.214	0.163	0.1495	0.172	0.14	0.1565	0.154	0.151	0.189	0.2105	0.174	0.1795	0.1635	0.194	0.2305	0.1595	0.1815	0.1425	0.1405	0.154	0.194	0.1715	0.1365
14	0.158	0.1735	0.155	0.199	0.187	0.194	0.1595	0.184	0.1715	0.168	0.1525	0.1455	0.2015	0.171	0.201	0.164	0.141	0.1625	0.132	0.1515	0.1505	0.1485	0.185	0.201	0.173	0.169	0.1605	0.185	0.2165	0.1545	0.1745	0.1395	0.1365	0.1465	0.1795	0.1745	0.133
14.25	0.154	0.17	0.1575	0.185	0.1795	0.183	0.1535	0.1685	0.169	0.161	0.152	0.138	0.195	0.168	0.1955	0.1575	0.133	0.1565	0.126	0.141	0.138	0.143	0.179	0.184	0.168	0.1625	0.1535	0.179	0.2005	0.141	0.169	0.135	0.1315	0.1375	0.1725	0.1655	0.142
14.5	0.1565	0.1705	0.1445	0.175	0.1755	0.1855	0.151	0.1565	0.1675	0.1505	0.1505	0.1395	0.1855	0.1685	0.1875	0.149	0.1315	0.1525	0.1235	0.138	0.1475	0.137	0.169	0.1825	0.161	0.1585	0.144	0.1805	0.1935	0.14	0.1625	0.129	0.128	0.1355	0.1645	0.1535	0.137
14.75	0.1465	0.1665	0.1385	0.171	0.1715	0.174	0.1445	0.1575	0.1575	0.145	0.1435	0.1395	0.1745	0.1615	0.1825	0.144	0.137	0.148	0.12	0.1375	0.158	0.136	0.1625	0.175	0.159	0.1545	0.1425	0.1795	0.185	0.138	0.1535	0.13	0.1285	0.131	0.1645	0.152	0.1265
15	0.142	0.162	0.1395	0.173	0.168	0.174	0.144	0.155	0.1515	0.1425	0.1475	0.1295	0.1725	0.1615	0.182	0.1455	0.13	0.147	0.118	0.1325	0.1515	0.1305	0.16	0.172	0.153	0.1505	0.138	0.171	0.1825	0.1375	0.1495	0.127	0.1225	0.1255	0.162	0.147	0.1245
15.25	0.141	0.1635	0.137	0.165	0.1645	0.1725	0.136	0.1475	0.1525	0.1345	0.145	0.124	0.166	0.1505	0.1755	0.1475	0.126	0.1495	0.1165	0.126	0.1395	0.133	0.155	0.168	0.1515	0.146	0.1355	0.164	0.184	0.138	0.148	0.125	0.118	0.125	0.1525	0.145	0.1205
15.5	0.1345	0.1615	0.1365	0.1575	0.1595	0.168	0.1335	0.1405	0.155	0.1325	0.1415	0.1245	0.163	0.1495	0.174	0.149	0.118	0.145	0.1145	0.123	0.133	0.128	0.1535	0.16	0.1515	0.1425	0.1345	0.164	0.1725	0.1385	0.146	0.1205	0.121	0.1215	0.1525	0.1345	0.1205
15.75	0.131	0.155	0.1355	0.158	0.152	0.161	0.1325	0.132	0.151	0.1265	0.137	0.126	0.1675	0.158	0.171	0.13	0.1145	0.1515	0.1105	0.12	0.138	0.1275	0.1495	0.154	0.1465	0.138	0.1335	0.164	0.1685	0.1275	0.1445	0.1215	0.12	0.1175	0.1495	0.13	0.119
16	0.1295	0.1515	0.134	0.152	0.1465	0.161	0.135	0.1345	0.1465	0.1285	0.136	0.131	0.165	0.151	0.176	0.131	0.117	0.147	0.1095	0.116	0.1455	0.13	0.146	0.1535	0.139	0.1355	0.133	0.1505	0.1685	0.1285	0.144	0.116	0.118	0.1155	0.1455	0.1325	0.114
16.25	0.1305	0.1575	0.132	0.1515	0.14	0.1625	0.135	0.1315	0.1425	0.1255	0.1305	0.1235	0.1555	0.1505	0.1695	0.126	0.119	0.135	0.1085	0.1105	0.135	0.124	0.135	0.1455	0.1395	0.134	0.1275	0.1535	0.155	0.1295	0.141	0.115	0.116	0.1115	0.1475	0.134	0.1085
16.5	0.1315	0.16	0.134	0.152	0.1375	0.1535	0.1305	0.1325	0.139	0.123	0.127	0.123	0.1505	0.1465	0.164	0.123	0.116	0.131	0.1035	0.1125	0.1315	0.1265	0.1365	0.14	0.141	0.1335	0.1255	0.148	0.154	0.122	0.132	0.1115	0.11	0.1135	0.141	0.131	0.11
16.75	0.1285	0.1505	0.122	0.145	0.1355	0.1515	0.13	0.1345	0.1405	0.119	0.13	0.1155	0.155	0.1455	0.163	0.122	0.116	0.13	0.1025	0.1085	0.1285	0.1255	0.14	0.1355	0.1365	0.129	0.13	0.143	0.16	0.12	0.1275	0.1065	0.1065	0.1105	0.1355	0.121	0.1115
17	0.1285	0.1445	0.1205	0.142	0.126	0.1555	0.1305	0.132	0.14	0.1165	0.1265	0.116	0.1515	0.135	0.158	0.125	0.1105	0.1245	0.103	0.109	0.1225	0.115	0.142	0.139	0.1385	0.1255	0.126	0.147	0.156	0.121	0.1315	0.1105	0.11	0.1065	0.1375	0.117	0.1045
17.25	0.1255	0.133	0.117	0.1455	0.1305	0.152	0.121	0.127	0.1385	0.1155	0.126	0.115	0.1445	0.129	0.155	0.127	0.1055	0.1195	0.1035	0.107	0.112	0.11	0.1375	0.1365	0.1425	0.124	0.121	0.1505	0.152	0.116	0.132	0.11	0.1095	0.104	0.1385	0.116	0.0985
17.5	0.1215	0.133	0.122	0.142	0.131	0.151	0.116	0.128	0.1355	0.1145	0.1245	0.117	0.1475	0.1305	0.1615	0.1215	0.102	0.1285	0.103	0.1045	0.1025	0.116	0.131	0.133	0.1395	0.122	0.1165	0.1475	0.1465	0.1165	0.126	0.107	0.108	0.103	0.1315	0.1165	0.102
17.75	0.122	0.128	0.1185	0.1365	0.123	0.1495	0.1145	0.125	0.1335	0.112	0.123	0.116	0.148	0.127	0.1585	0.116	0.098	0.123	0.1025	0.1015	0.1065	0.113	0.132	0.136	0.1365	0.121	0.118	0.141	0.1495	0.118	0.1245	0.1075	0.1045	0.0995	0.1285	0.115	0.104
18	0.1195	0.1245	0.108	0.1315	0.1175	0.14	0.115	0.1235	0.1315	0.1105	0.1215	0.111	0.1445	0.1255	0.1575	0.1225	0.1055	0.1125	0.0995	0.1035	0.1035	0.111	0.1305	0.1325	0.1345	0.118	0.114	0.131	0.141	0.117	0.1185	0.111	0.1015	0.097	0.124	0.109	0.103
18.25	0.114	0.1225	0.116	0.133	0.1185	0.1385	0.11	0.1195	0.129	0.11	0.115	0.106	0.144	0.1255	0.1575	0.12	0.109	0.1145	0.093	0.1015	0.101	0.1115	0.1235	0.1255	0.128	0.1105	0.11	0.1325	0.135	0.107	0.121	0.1075	0.098	0.0945	0.126	0.103	0.0965
18.5	0.1105	0.1215	0.112	0.1265	0.1145	0.1365	0.105	0.116	0.1285	0.1085	0.115	0.1	0.1395	0.1215	0.152	0.118	0.1105	0.1145	0.0905	0.099	0.098	0.1075	0.1215	0.1265	0.13	0.109	0.1095	0.133	0.136	0.1055	0.1155	0.1055	0.0955	0.091	0.1285	0.103	0.0935
18.75	0.1115	0.109	0.1095	0.126	0.1115	0.1365	0.098	0.115	0.124	0.107	0.116	0.101	0.139	0.1145	0.147	0.1145	0.103	0.11	0.0915	0.0955	0.093	0.106	0.1185	0.127	0.1235	0.11	0.11	0.129	0.13	0.1105	0.1115	0.1045	0.093	0.0915	0.123	0.105	0.0935
19	0.1105	0.1045	0.101	0.1255	0.1105	0.1285	0.0945	0.106	0.1225	0.103	0.1105	0.103	0.139	0.119	0.148	0.115	0.0995	0.104	0.087	0.0945	0.0955	0.103	0.1185	0.1245	0.1225	0.109	0.1055	0.1245	0.131	0.104	0.111	0.1005	0.0905	0.0925	0.1215	0.103	0.0915
19.25	0.1085	0.106	0.109	0.121	0.1065	0.124	0.0945	0.104	0.117	0.104	0.1065	0.0965	0.1345	0.114	0.1435	0.1085	0.0995	0.099	0.0855	0.094	0.098	0.1025	0.1155	0.1155	0.1135	0.1075	0.104	0.117	0.1315	0.105	0.107	0.102	0.0905	0.089	0.116	0.0975	0.0915
19.5	0.1045	0.1025	0.102	0.118	0.106	0.123	0.0935	0.1025	0.1135	0.102	0.108	0.089	0.1355	0.1085	0.136	0.1055	0.102	0.097	0.087	0.094	0.0915	0.1	0.1145	0.1095	0.1135	0.1045	0.105	0.115	0.1235	0.0985	0.102	0.0985	0.089	0.086	0.116	0.0925	0.0895
19.75	0.1045	0.1005	0.0905	0.1155	0.1035	0.123	0.0915	0.1035	0.1085	0.1	0.1035	0.0935	0.13	0.1095	0.141	0.1035	0.0955	0.099	0.0825	0.09	0.091	0.096	0.1125	0.112	0.113	0.1015	0.1005	0.1125	0.1285	0.098	0.102	0.096	0.086	0.083	0.113	0.093	0.0885
20	0.104	0.1025	0.0895	0.1125	0.102	0.116	0.0915	0.102	0.109	0.0985	0.1025	0.093	0.125	0.1045	0.1375	0.102	0.0895	0.0965	0.081	0.0885	0.0905	0.098	0.105	0.109	0.1135	0.101	0.0985	0.1155	0.122	0.0935	0.1005	0.093	0.0835	0.083	0.1115	0.0895	0.0835
20.25	0.098	0.098	0.09	0.11	0.098	0.1085	0.089	0.1005	0.103	0.0965	0.1055	0.089	0.1255	0.1025	0.1315	0.106	0.093	0.0905	0.081	0.0895	0.1005	0.096	0.1015	0.102	0.1045	0.0995	0.0965	0.1065	0.1205	0.0935	0.0985	0.0905	0.0855	0.0795	0.109	0.0855	0.0825
20.5	0.0965	0.0945	0.0905	0.111	0.0955	0.112	0.0905	0.098	0.102	0.094	0.1065	0.0855	0.1355	0.1025	0.1295	0.1035	0.092	0.0905	0.0765	0.0895	0.0875	0.093	0.1	0.1015	0.1045	0.1	0.0975	0.104	0.1175	0.0895	0.095	0.087	0.0835	0.078	0.108	0.0865	0.0825
20.75	0.096	0.096	0.092	0.1075	0.0935	0.1135	0.0875	0.096	0.1005	0.094	0.104	0.0835	0.1315	0.101	0.127	0.1005	0.096	0.0895	0.076	0.0875	0.075	0.0915	0.0985	0.1015	0.1045	0.0945	0.093	0.107	0.1125	0.0855	0.0945	0.09	0.0805	0.0765	0.105	0.0865	0.078
21	0.094	0.096	0.0935	0.1075	0.0935	0.1075	0.0845	0.0935	0.0995	0.094	0.098	0.0835	0.1275	0.1065	0.1265	0.0995	0.092	0.0915	0.075	0.085	0.0835	0.0915	0.097	0.098	0.1045	0.0925	0.091	0.105	0.1135	0.0905	0.0905	0.0865	0.077	0.075	0.106	0.0855	0.0785
21.25	0.0925	0.0945	0.086	0.1125	0.0915	0.1085	0.0835	0.0925	0.098	0.09	0.0935	0.0875	0.1255	0.1095	0.126	0.094	0.089	0.088	0.0735	0.0825	0.082	0.09	0.0965	0.095	0.099	0.094	0.0875	0.104	0.1095	0.088	0.092	0.085	0.079	0.0745	0.1045	0.084	0.077
21.5	0.0925	0.093	0.0855	0.1095	0.0875	0.102	0.0825	0.0915	0.0955	0.0905	0.094	0.0815	0.1185	0.107	0.123	0.0925	0.0865	0.084	0.0725	0.082	0.084	0.0835	0.089	0.091	0.096	0.0935	0.0865	0.102	0.104	0.086	0.091	0.082	0.0795	0.073	0.104	0.082	0.074
21.75	0.0915	0.089	0.0805	0.1035	0.0865	0.105	0.0825	0.09	0.0935	0.088	0.0945	0.078	0.1185	0.1005	0.117	0.1035	0.0855	0.0805	0.074	0.084	0.083	0.0835	0.0875	0.092	0.0985	0.0925	0.0865	0.0985	0.105	0.0835	0.0885	0.084	0.08	0.072	0.101	0.078	0.0735
22	0.0915	0.0835	0.0845	0.099	0.085	0.101	0.0835	0.087	0.094	0.0855	0.0915	0.0775	0.116	0.0905	0.118	0.102	0.086	0.0815	0.0745	0.0835	0.078	0.0815	0.086	0.0915	0.098	0.089	0.0835	0.095	0.104	0.08	0.0845	0.0825	0.0735	0.071	0.101	0.0775	0.073
22.25	0.0885	0.0835	0.081	0.097	0.083	0.1	0.08	0.0875	0.089	0.085	0.0895	0.079	0.111	0.09	0.119	0.098	0.084	0.08	0.072	0.082	0.0795	0.0815	0.084	0.087	0.0995	0.0865	0.085	0.0935	0.1035	0.0795	0.082	0.0805	0.071	0.0705	0.096	0.076	0.069
22.5	0.089	0.0855	0.077	0.0965	0.0825	0.0975	0.078	0.084	0.089	0.088	0.087	0.08	0.1115	0.0915	0.1165	0.095	0.081	0.076	0.072	0.0835	0.0795	0.0815	0.0815	0.0855	0.0955	0.0875	0.0855	0.0935	0.0975	0.0825	0.0825	0.078	0.073	0.0695	0.0915	0.0745	0.067
22.75	0.0875	0.088	0.079	0.0935	0.081	0.0935	0.0765	0.083	0.089	0.0845	0.087	0.0795	0.109	0.0945	0.111	0.096	0.082	0.077	0.0715	0.0825	0.0765	0.081	0.081	0.083	0.0925	0.087	0.0835	0.0935	0.101	0.0825	0.0835	0.078	0.0735	0.0675	0.0925	0.0755	0.064
23	0.086	0.084	0.086	0.095	0.0805	0.0995	0.075	0.0835	0.0885	0.086	0.087	0.077	0.1065	0.095	0.11	0.094	0.0805	0.08	0.071	0.08	0.067	0.0795	0.0805	0.082	0.09	0.084	0.083	0.095	0.1015	0.0795	0.082	0.0765	0.072	0.067	0.0955	0.073	0.068
23.25	0.085	0.0805	0.0825	0.096	0.081	0.0955	0.077	0.0825	0.086	0.085	0.0875	0.077	0.1035	0.085	0.1085	0.0945	0.0775	0.078	0.072	0.0795	0.0715	0.076	0.0805	0.0815	0.091	0.082	0.08	0.093	0.0975	0.0785	0.082	0.076	0.0725	0.0645	0.093	0.074	0.0655
23.5	0.081	0.081	0.083	0.0915	0.077	0.0955	0.077	0.081	0.0845	0.0805	0.0865	0.072	0.1035	0.088	0.1085	0.098	0.0795	0.0755	0.07	0.0795	0.0745	0.0755	0.079	0.081	0.093	0.0815	0.081	0.093	0.0945	0.0775	0.082	0.077	0.0695	0.063	0.093	0.07	0.0635
23.75	0.0805	0.0775	0.0825	0.0885	0.0755	0.089	0.0775	0.077	0.0835	0.081	0.0865	0.0705	0.1025	0.0875	0.1055	0.0975	0.0775	0.072	0.0695	0.081	0.071	0.0765	0.078	0.0775	0.0905	0.08	0.0825	0.091	0.0925	0.078	0.0835	0.078	0.0685	0.0635	0.0925	0.073	0.0665
24	0.081	0.082	0.0825	0.0885	0.0795	0.093	0.0755	0.0745	0.0845	0.08	0.083	0.0815	0.108	0.096	0.108	0.102	0.076	0.0705	0.0705	0.0785	0.0685	0.074	0.076	0.077	0.091	0.0805	0.079	0.091	0.089	0.082	0.0805	0.0765	0.067	0.063	0.088	0.073	0.066
24.25	0.081	0.081	0.0795	0.088	0.0775	0.0945	0.0755	0.0755	0.083	0.0755	0.081	0.076	0.1015	0.085	0.1025	0.0885	0.074	0.0735	0.069	0.0785	0.0715	0.0745	0.074	0.076	0.0885	0.0795	0.0795	0.0835	0.0925	0.0785	0.0775	0.0735	0.0705	0.062	0.089	0.0705	0.0635
24.5	0.078	0.0795	0.078	0.089	0.0765	0.0935	0.0725	0.077	0.079	0.0755	0.082	0.075	0.096	0.085	0.1025	0.082	0.0745	0.069	0.068	0.08	0.0715	0.0735	0.073	0.075	0.089	0.077	0.0815	0.088	0.0885	0.0785	0.0745	0.0735	0.069	0.06	0.0855	0.067	0.0635
24.75	0.0785	0.0805	0.079	0.0925	0.077	0.092	0.07	0.076	0.0785	0.0755	0.0805	0.067	0.095	0.087	0.099	0.084	0.0735	0.066	0.068	0.0765	0.071	0.0735	0.0745	0.075	0.091	0.0775	0.079	0.087	0.0885	0.08	0.0765	0.0725	0.0665	0.0585	0.085	0.068	0.063
25	0.0805	0.0775	0.0775	0.0865	0.0755	0.0895	0.0685	0.073	0.08	0.0745	0.0825	0.0655	0.0925	0.092	0.0995	0.085	0.075	0.0665	0.067	0.077	0.0685	0.0715	0.0755	0.074	0.0905	0.076	0.0795	0.088	0.0905	0.076	0.0775	0.073	0.066	0.0575	0.084	0.0665	0.063
25.25	0.077	0.074	0.075	0.081	0.0705	0.0865	0.069	0.0715	0.0785	0.076	0.08	0.067	0.094	0.0885	0.098	0.0855	0.075	0.0645	0.0655	0.078	0.071	0.073	0.074	0.074	0.0905	0.0785	0.0795	0.0895	0.088	0.0735	0.0755	0.0715	0.067	0.057	0.083	0.067	0.058
25.5	0.075	0.072	0.0765	0.085	0.072	0.086	0.07	0.071	0.0755	0.075	0.081	0.068	0.097	0.084	0.099	0.0855	0.073	0.0625	0.0665	0.0785	0.07	0.0735	0.073	0.0735	0.094	0.0785	0.08	0.086	0.0875	0.073	0.077	0.073	0.067	0.058	0.0835	0.067	0.0585
25.75	0.073	0.0725	0.077	0.0815	0.0715	0.082	0.069	0.0695	0.075	0.073	0.0805	0.069	0.0945	0.081	0.097	0.0815	0.0765	0.065	0.065	0.0745	0.0675	0.0705	0.075	0.0725	0.093	0.0775	0.0795	0.0845	0.0855	0.074	0.0765	0.07	0.0665	0.0565	0.083	0.0655	0.0605
26	0.073	0.0675	0.0725	0.0815	0.07	0.0835	0.068	0.0695	0.074	0.072	0.0835	0.0685	0.0915	0.088	0.0965	0.0885	0.077	0.0635	0.0635	0.074	0.0635	0.069	0.0745	0.0705	0.09	0.079	0.0775	0.086	0.0865	0.0765	0.074	0.0695	0.064	0.055	0.0835	0.064	0.059
26.25	0.0725	0.068	0.0705	0.078	0.0685	0.0825	0.0685	0.0705	0.0745	0.0745	0.0805	0.0675	0.0895	0.091	0.0955	0.0795	0.073	0.064	0.065	0.074	0.0655	0.0685	0.073	0.0705	0.0865	0.077	0.08	0.081	0.084	0.075	0.0745	0.069	0.062	0.0545	0.0855	0.0655	0.057
26.5	0.0715	0.0725	0.0685	0.08	0.069	0.0795	0.0665	0.0685	0.074	0.072	0.073	0.0655	0.0895	0.0915	0.0945	0.0745	0.071	0.0615	0.0655	0.076	0.071	0.072	0.072	0.071	0.0875	0.0765	0.0805	0.082	0.081	0.0765	0.072	0.07	0.0595	0.055	0.0835	0.062	0.057
26.75	0.0725	0.068	0.0695	0.0815	0.068	0.082	0.0655	0.0655	0.073	0.0695	0.0725	0.064	0.093	0.091	0.0955	0.0755	0.0705	0.0615	0.0655	0.077	0.0725	0.0695	0.0675	0.0705	0.0895	0.075	0.081	0.084	0.0825	0.079	0.0715	0.073	0.0625	0.054	0.0805	0.065	0.058
27	0.0705	0.0695	0.0685	0.0795	0.068	0.082	0.067	0.0675	0.0735	0.0685	0.0745	0.064	0.092	0.087	0.0965	0.084	0.07	0.063	0.065	0.0745	0.0735	0.068	0.0675	0.0705	0.0885	0.0745	0.08	0.0825	0.0835	0.0745	0.0705	0.072	0.063	0.052	0.0775	0.0625	0.059
27.25	0.07	0.068	0.068	0.078	0.067	0.0815	0.0675	0.0665	0.073	0.0675	0.075	0.0605	0.0875	0.08	0.0965	0.08	0.073	0.061	0.0655	0.074	0.0675	0.0655	0.0705	0.0715	0.09	0.0725	0.079	0.0825	0.083	0.0725	0.0705	0.068	0.0625	0.052	0.078	0.064	0.0585
27.5	0.0705	0.0675	0.0685	0.079	0.0675	0.082	0.0685	0.0655	0.07	0.0695	0.075	0.0605	0.0875	0.077	0.097	0.0765	0.071	0.06	0.063	0.0745	0.0685	0.068	0.0715	0.0695	0.0855	0.0705	0.0795	0.0785	0.0795	0.072	0.069	0.0685	0.062	0.0505	0.08	0.062	0.0565
27.75	0.0715	0.0695	0.07	0.076	0.0675	0.079	0.067	0.0645	0.0705	0.0695	0.0765	0.06	0.0845	0.084	0.095	0.078	0.069	0.0565	0.0645	0.0745	0.075	0.0665	0.071	0.0675	0.082	0.0735	0.0775	0.0775	0.0785	0.073	0.069	0.069	0.062	0.0505	0.0815	0.061	0.056
28	0.069	0.07	0.0695	0.074	0.0675	0.08	0.0635	0.0655	0.071	0.0705	0.076	0.0635	0.086	0.0915	0.093	0.0755	0.069	0.057	0.0635	0.0725	0.0685	0.067	0.071	0.065	0.0815	0.0735	0.076	0.0775	0.0795	0.072	0.074	0.0675	0.0625	0.051	0.08	0.0615	0.0565
28.25	0.067	0.07	0.069	0.0765	0.066	0.0805	0.0625	0.065	0.0715	0.068	0.077	0.0635	0.085	0.091	0.093	0.0755	0.07	0.057	0.0615	0.072	0.0695	0.066	0.069	0.067	0.085	0.07	0.0785	0.079	0.0775	0.074	0.0735	0.068	0.0605	0.05	0.0805	0.058	0.0555
28.5	0.0685	0.067	0.072	0.0765	0.0645	0.0775	0.0625	0.0645	0.0695	0.067	0.0785	0.06	0.087	0.089	0.093	0.074	0.069	0.0595	0.059	0.073	0.0715	0.063	0.0695	0.065	0.086	0.0715	0.077	0.075	0.0765	0.0685	0.07	0.0675	0.0605	0.0485	0.08	0.0595	0.0545
28.75	0.069	0.0675	0.072	0.0765	0.066	0.077	0.066	0.064	0.0705	0.0665	0.076	0.0585	0.0855	0.084	0.093	0.075	0.069	0.056	0.0595	0.0725	0.0715	0.0635	0.0675	0.0635	0.086	0.0715	0.0765	0.0775	0.0755	0.0705	0.0695	0.0675	0.059	0.048	0.083	0.06	0.056
29	0.0685	0.065	0.075	0.075	0.067	0.0775	0.0635	0.063	0.067	0.0665	0.0765	0.063	0.082	0.0885	0.094	0.0735	0.0705	0.057	0.0615	0.0745	0.07	0.064	0.0685	0.0645	0.0895	0.0715	0.0765	0.0765	0.073	0.0715	0.0685	0.066	0.0575	0.047	0.0805	0.0585	0.056
29.25	0.0685	0.064	0.0685	0.0735	0.067	0.0775	0.065	0.063	0.068	0.0675	0.0745	0.0625	0.0815	0.086	0.0905	0.075	0.07	0.0595	0.063	0.0715	0.0705	0.0615	0.0695	0.063	0.0905	0.073	0.0775	0.0755	0.073	0.0705	0.07	0.0635	0.058	0.0475	0.0765	0.06	0.057
29.5	0.068	0.0645	0.069	0.072	0.0655	0.075	0.0625	0.0625	0.068	0.067	0.0725	0.059	0.0805	0.0865	0.0915	0.0745	0.0695	0.0585	0.0645	0.071	0.068	0.0595	0.07	0.0605	0.088	0.0725	0.0755	0.075	0.073	0.0725	0.0675	0.0645	0.0575	0.0465	0.073	0.059	0.055
29.75	0.0685	0.0645	0.067	0.0725	0.0675	0.072	0.062	0.064	0.0685	0.067	0.07	0.061	0.081	0.089	0.0925	0.0765	0.0685	0.0585	0.0585	0.0725	0.073	0.0595	0.069	0.064	0.09	0.0685	0.0745	0.074	0.073	0.074	0.0675	0.066	0.0595	0.046	0.073	0.0575	0.0565
30	0.0675	0.064	0.0655	0.0735	0.0675	0.075	0.062	0.0605	0.0675	0.066	0.07	0.059	0.0805	0.0865	0.091	0.079	0.0695	0.0555	0.058	0.0725	0.0755	0.061	0.069	0.063	0.09	0.071	0.075	0.072	0.0715	0.0705	0.0655	0.0635	0.0575	0.046	0.074	0.0565	0.0545
30.25	0.0665	0.0635	0.0665	0.0715	0.064	0.0765	0.0625	0.0605	0.067	0.066	0.0695	0.0575	0.0785	0.0855	0.0885	0.082	0.0705	0.056	0.059	0.0725	0.0715	0.0595	0.0685	0.063	0.0855	0.07	0.075	0.068	0.0715	0.0705	0.064	0.065	0.057	0.0465	0.0745	0.053	0.0565
30.5	0.067	0.064	0.0695	0.069	0.0665	0.0765	0.0645	0.0615	0.066	0.065	0.0725	0.0575	0.0765	0.0855	0.0885	0.0745	0.069	0.058	0.0595	0.072	0.07	0.0595	0.07	0.06	0.084	0.0705	0.0735	0.0695	0.069	0.0685	0.064	0.064	0.061	0.0465	0.072	0.055	0.057
30.75	0.0675	0.063	0.067	0.07	0.068	0.076	0.064	0.0625	0.064	0.065	0.0695	0.06	0.0785	0.0845	0.0895	0.0695	0.0685	0.0575	0.0585	0.072	0.0705	0.061	0.0695	0.0605	0.088	0.072	0.0735	0.0705	0.072	0.0665	0.0615	0.0625	0.0595	0.045	0.0705	0.055	0.055
31	0.066	0.065	0.069	0.0685	0.0675	0.077	0.062	0.061	0.0635	0.065	0.0695	0.06	0.0795	0.087	0.0895	0.0715	0.069	0.0555	0.061	0.071	0.071	0.06	0.0665	0.0615	0.0885	0.0715	0.0745	0.07	0.068	0.0675	0.0605	0.0645	0.059	0.044	0.0735	0.053	0.0555
31.25	0.0665	0.0655	0.0655	0.068	0.069	0.0755	0.062	0.058	0.066	0.065	0.0715	0.0585	0.0765	0.0865	0.087	0.0765	0.0715	0.056	0.0605	0.071	0.0665	0.059	0.0665	0.0605	0.089	0.0685	0.0735	0.0695	0.067	0.067	0.0615	0.0635	0.059	0.046	0.0735	0.054	0.0545
31.5	0.069	0.0675	0.0655	0.0685	0.065	0.072	0.062	0.0615	0.065	0.065	0.07	0.0575	0.072	0.088	0.0875	0.0765	0.072	0.0555	0.058	0.071	0.064	0.061	0.0675	0.059	0.0925	0.0685	0.073	0.0655	0.066	0.0715	0.061	0.0645	0.0595	0.046	0.075	0.0525	0.0545
31.75	0.0695	0.0665	0.064	0.07	0.0655	0.072	0.0655	0.0605	0.065	0.063	0.0695	0.0565	0.074	0.0915	0.0875	0.0795	0.0685	0.058	0.0595	0.072	0.0645	0.06	0.0675	0.0575	0.096	0.069	0.0725	0.069	0.0655	0.0725	0.0615	0.0635	0.0565	0.046	0.07	0.053	0.055
32	0.07	0.069	0.065	0.07	0.067	0.0715	0.0685	0.061	0.0635	0.064	0.0695	0.074	0.0805	0.089	0.0945	0.0835	0.0625	0.059	0.0615	0.072	0.0635	0.0585	0.0695	0.0575	0.096	0.0695	0.075	0.069	0.066	0.0715	0.062	0.066	0.0555	0.046	0.069	0.0555	0.058
32.25	0.066	0.0665	0.065	0.0705	0.066	0.07	0.063	0.0575	0.063	0.0645	0.0705	0.0645	0.076	0.0865	0.086	0.073	0.066	0.0545	0.0605	0.071	0.0635	0.06	0.068	0.0585	0.094	0.0695	0.072	0.0695	0.0655	0.072	0.0625	0.0675	0.0575	0.045	0.0735	0.0525	0.058
32.5	0.066	0.0665	0.064	0.067	0.0675	0.071	0.061	0.0565	0.0625	0.0625	0.071	0.0575	0.0745	0.0895	0.085	0.074	0.066	0.053	0.0605	0.072	0.0635	0.059	0.066	0.0605	0.0895	0.0665	0.072	0.0665	0.065	0.073	0.061	0.0655	0.0575	0.0455	0.0725	0.051	0.057
32.75	0.066	0.067	0.063	0.0695	0.0675	0.0735	0.062	0.058	0.0625	0.0635	0.0705	0.059	0.0745	0.083	0.085	0.071	0.0705	0.051	0.059	0.073	0.0655	0.0565	0.066	0.0605	0.089	0.067	0.0715	0.0645	0.0635	0.069	0.0595	0.0645	0.0565	0.0445	0.069	0.0515	0.057
33	0.067	0.066	0.062	0.07	0.065	0.074	0.0625	0.0605	0.065	0.0655	0.0695	0.0555	0.07	0.081	0.0855	0.071	0.068	0.054	0.0595	0.0735	0.066	0.0585	0.067	0.06	0.0885	0.069	0.0735	0.0675	0.062	0.0715	0.0575	0.063	0.0565	0.0435	0.0695	0.0505	0.056
33.25	0.0675	0.066	0.0635	0.067	0.0645	0.0735	0.063	0.061	0.0635	0.0645	0.0675	0.0565	0.0705	0.0835	0.085	0.0745	0.0715	0.0535	0.0615	0.0735	0.068	0.058	0.0665	0.061	0.0915	0.069	0.073	0.067	0.06	0.069	0.0585	0.061	0.057	0.045	0.072	0.0505	0.056
33.5	0.068	0.068	0.067	0.0685	0.0655	0.0745	0.0625	0.0615	0.0625	0.064	0.067	0.06	0.0735	0.079	0.083	0.0745	0.0725	0.052	0.0605	0.074	0.071	0.0575	0.0675	0.06	0.093	0.069	0.072	0.0655	0.0605	0.067	0.0595	0.0625	0.055	0.0445	0.07	0.0515	0.0575
33.75	0.067	0.0675	0.065	0.068	0.067	0.074	0.062	0.0595	0.0615	0.064	0.067	0.056	0.0715	0.0845	0.085	0.073	0.069	0.055	0.059	0.0735	0.0695	0.058	0.0675	0.0585	0.099	0.0695	0.0735	0.0635	0.0615	0.07	0.058	0.0615	0.0565	0.043	0.0705	0.0505	0.0585
34	0.065	0.067	0.061	0.069	0.066	0.071	0.0615	0.06	0.062	0.065	0.0705	0.056	0.073	0.0795	0.087	0.0705	0.071	0.0565	0.061	0.075	0.0665	0.059	0.0685	0.0615	0.0945	0.071	0.073	0.064	0.0625	0.074	0.0585	0.0635	0.057	0.043	0.0685	0.048	0.0605
34.25	0.067	0.068	0.0655	0.0715	0.067	0.073	0.062	0.06	0.0625	0.0625	0.072	0.06	0.0705	0.0875	0.086	0.0735	0.0765	0.0585	0.063	0.0765	0.07	0.059	0.0705	0.058	0.095	0.0685	0.0725	0.0635	0.0645	0.07	0.058	0.063	0.0555	0.044	0.0675	0.0485	0.0595
34.5	0.067	0.0675	0.0605	0.0695	0.0665	0.0745	0.0615	0.061	0.0615	0.065	0.071	0.0615	0.0735	0.0835	0.0825	0.072	0.077	0.0535	0.063	0.075	0.069	0.0575	0.0675	0.0575	0.098	0.068	0.074	0.064	0.063	0.07	0.0585	0.062	0.0575	0.0435	0.0655	0.0495	0.057
34.75	0.0675	0.0675	0.0595	0.0685	0.0665	0.0745	0.063	0.061	0.0605	0.0645	0.0675	0.056	0.074	0.0845	0.0835	0.076	0.0695	0.052	0.0635	0.0775	0.073	0.0585	0.0685	0.059	0.0905	0.067	0.074	0.067	0.059	0.071	0.057	0.064	0.057	0.044	0.0655	0.048	0.0545
35	0.0675	0.0695	0.0625	0.07	0.0655	0.071	0.0625	0.063	0.061	0.0645	0.067	0.0535	0.073	0.083	0.084	0.074	0.0695	0.0545	0.0625	0.077	0.0705	0.0575	0.069	0.057	0.0915	0.0665	0.073	0.065	0.0575	0.0695	0.0545	0.0625	0.058	0.0445	0.063	0.048	0.0565
35.25	0.067	0.069	0.0595	0.0695	0.065	0.0725	0.0615	0.061	0.063	0.065	0.069	0.056	0.0725	0.0805	0.0845	0.0745	0.069	0.054	0.0615	0.0765	0.063	0.059	0.07	0.0585	0.0955	0.068	0.0735	0.063	0.058	0.071	0.0555	0.06	0.057	0.0445	0.066	0.047	0.0585
35.5	0.069	0.067	0.059	0.067	0.0675	0.074	0.0635	0.0615	0.0635	0.0655	0.0695	0.055	0.075	0.082	0.084	0.076	0.074	0.0575	0.06	0.075	0.0665	0.059	0.0705	0.0595	0.0945	0.068	0.076	0.064	0.0585	0.066	0.0565	0.0595	0.056	0.0445	0.0675	0.0475	0.056
35.75	0.0685	0.069	0.0595	0.068	0.068	0.0715	0.063	0.0615	0.063	0.0645	0.0665	0.054	0.0765	0.0835	0.085	0.075	0.074	0.055	0.062	0.078	0.071	0.0585	0.07	0.058	0.098	0.067	0.076	0.0635	0.0585	0.0645	0.0575	0.061	0.055	0.045	0.065	0.05	0.055
36	0.0685	0.07	0.0655	0.0685	0.069	0.0695	0.0615	0.0615	0.06	0.0645	0.064	0.0575	0.0715	0.079	0.085	0.073	0.078	0.053	0.061	0.079	0.07	0.056	0.071	0.0595	0.0985	0.0675	0.0755	0.06	0.0595	0.068	0.056	0.064	0.0545	0.0425	0.0645	0.049	0.0575
36.25	0.0685	0.069	0.062	0.069	0.0685	0.0715	0.0615	0.063	0.059	0.064	0.0675	0.0545	0.072	0.076	0.0845	0.0705	0.078	0.0535	0.061	0.078	0.0735	0.057	0.072	0.06	0.1025	0.067	0.0715	0.062	0.0605	0.069	0.0555	0.062	0.055	0.042	0.066	0.0465	0.06
36.5	0.068	0.067	0.0595	0.0675	0.066	0.073	0.0615	0.063	0.0595	0.065	0.0655	0.055	0.068	0.071	0.087	0.072	0.0705	0.0535	0.0635	0.0765	0.069	0.059	0.0695	0.0595	0.1	0.0685	0.0715	0.063	0.058	0.0705	0.0545	0.0615	0.055	0.044	0.0665	0.0465	0.0585
36.75	0.07	0.07	0.0605	0.0685	0.0695	0.0705	0.063	0.064	0.0615	0.066	0.068	0.0545	0.069	0.0735	0.084	0.073	0.0705	0.0565	0.062	0.0775	0.067	0.057	0.0685	0.057	0.0995	0.0675	0.071	0.061	0.0575	0.0715	0.053	0.063	0.054	0.0435	0.064	0.047	0.0565
37	0.0715	0.069	0.058	0.07	0.0675	0.0715	0.063	0.0635	0.062	0.0645	0.0685	0.055	0.0695	0.0755	0.0815	0.0705	0.071	0.056	0.062	0.0795	0.068	0.057	0.0705	0.0575	0.097	0.069	0.072	0.0585	0.057	0.071	0.055	0.063	0.054	0.0435	0.0665	0.0455	0.0595
37.25	0.0705	0.0675	0.0605	0.0685	0.0675	0.0735	0.0635	0.0625	0.0625	0.063	0.0685	0.0555	0.069	0.077	0.0835	0.072	0.079	0.056	0.062	0.08	0.0665	0.058	0.0715	0.057	0.0955	0.066	0.0735	0.0595	0.0565	0.0725	0.056	0.0595	0.0565	0.0435	0.062	0.0475	0.0595
37.5	0.069	0.067	0.061	0.067	0.0695	0.075	0.0625	0.065	0.0635	0.063	0.069	0.0545	0.0685	0.0805	0.083	0.0695	0.078	0.0555	0.0625	0.08	0.065	0.0585	0.071	0.0565	0.095	0.067	0.072	0.0585	0.056	0.069	0.0535	0.0595	0.054	0.043	0.0625	0.047	0.056
37.75	0.071	0.07	0.0635	0.068	0.0685	0.072	0.0625	0.063	0.062	0.0635	0.068	0.053	0.073	0.084	0.0845	0.0685	0.076	0.0545	0.0635	0.081	0.068	0.056	0.0695	0.057	0.0985	0.0655	0.0725	0.057	0.0565	0.0645	0.053	0.0605	0.0555	0.0425	0.0615	0.045	0.061
38	0.0715	0.0675	0.059	0.0675	0.0665	0.071	0.0635	0.0615	0.061	0.0645	0.065	0.054	0.075	0.0795	0.081	0.0725	0.078	0.0535	0.064	0.0785	0.07	0.0555	0.068	0.0565	0.1005	0.066	0.074	0.0565	0.0575	0.066	0.053	0.0605	0.0555	0.0425	0.062	0.0445	0.057
38.25	0.07	0.071	0.063	0.0665	0.069	0.072	0.0625	0.063	0.0635	0.0655	0.068	0.054	0.0705	0.077	0.083	0.0735	0.0775	0.052	0.0615	0.0775	0.068	0.0585	0.069	0.0565	0.105	0.068	0.0715	0.055	0.0565	0.068	0.052	0.0625	0.055	0.0425	0.0615	0.0465	0.058
38.5	0.071	0.068	0.0615	0.067	0.0695	0.07	0.0625	0.0605	0.061	0.0665	0.067	0.0515	0.0705	0.0735	0.0835	0.0735	0.076	0.054	0.062	0.0785	0.062	0.0595	0.067	0.0585	0.102	0.0655	0.073	0.0565	0.0555	0.0685	0.0505	0.062	0.054	0.044	0.062	0.046	0.057
38.75	0.0715	0.0675	0.062	0.069	0.0695	0.072	0.063	0.06	0.06	0.066	0.0625	0.0525	0.069	0.0735	0.0815	0.072	0.076	0.053	0.06	0.0775	0.066	0.0575	0.069	0.057	0.1035	0.0635	0.071	0.0585	0.056	0.068	0.0515	0.061	0.0525	0.0435	0.061	0.045	0.0565
39	0.0725	0.0655	0.0615	0.0685	0.0685	0.0725	0.0645	0.0615	0.06	0.067	0.065	0.0515	0.0705	0.072	0.0805	0.0695	0.076	0.0495	0.0635	0.077	0.0655	0.0585	0.0675	0.0555	0.1015	0.066	0.071	0.056	0.0535	0.067	0.052	0.061	0.0515	0.042	0.0595	0.0425	0.0535
39.25	0.0725	0.0705	0.0625	0.068	0.0675	0.071	0.066	0.0625	0.06	0.0665	0.065	0.0505	0.0675	0.0705	0.0795	0.0665	0.0775	0.0515	0.0615	0.079	0.068	0.054	0.0695	0.057	0.105	0.0665	0.07	0.053	0.055	0.0655	0.05	0.0585	0.0535	0.041	0.0605	0.0425	0.0555
39.5	0.0725	0.071	0.0575	0.0665	0.0665	0.0705	0.0645	0.0615	0.0605	0.0675	0.063	0.0515	0.0675	0.0755	0.0795	0.0655	0.0785	0.0525	0.0625	0.078	0.0725	0.0535	0.0685	0.0565	0.1105	0.0655	0.072	0.053	0.056	0.064	0.0495	0.06	0.0535	0.04	0.0605	0.0425	0.0535
39.75	0.072	0.0705	0.0545	0.068	0.068	0.0675	0.0635	0.0635	0.061	0.0645	0.0635	0.053	0.0665	0.075	0.083	0.069	0.075	0.0515	0.062	0.076	0.0695	0.0545	0.066	0.055	0.1095	0.064	0.071	0.0525	0.055	0.067	0.0495	0.0615	0.0535	0.0415	0.0625	0.046	0.0505
40	0.073	0.068	0.0575	0.07	0.07	0.0695	0.064	0.0635	0.062	0.065	0.0635	0.052	0.068	0.073	0.083	0.073	0.074	0.052	0.0615	0.074	0.0645	0.056	0.0665	0.056	0.113	0.064	0.0695	0.051	0.0525	0.069	0.0485	0.06	0.053	0.041	0.0585	0.0445	0.049
40.25	0.073	0.0665	0.058	0.0685	0.0695	0.0735	0.067	0.062	0.0605	0.0645	0.0635	0.0495	0.0755	0.066	0.081	0.0685	0.0785	0.049	0.06	0.075	0.063	0.0545	0.067	0.055	0.1095	0.0635	0.0685	0.0525	0.051	0.0665	0.047	0.0615	0.054	0.0405	0.0585	0.042	0.049
40.5	0.072	0.0675	0.059	0.065	0.0685	0.074	0.066	0.063	0.0625	0.066	0.0655	0.049	0.0825	0.0675	0.0815	0.071	0.0775	0.052	0.0595	0.076	0.068	0.054	0.067	0.0545	0.1085	0.0635	0.0675	0.054	0.0515	0.0635	0.0455	0.06	0.052	0.04	0.0575	0.0415	0.052
40.75	0.072	0.067	0.058	0.0665	0.0685	0.075	0.0655	0.0625	0.063	0.067	0.0625	0.049	0.072	0.0695	0.0805	0.076	0.073	0.0515	0.06	0.0755	0.0675	0.0575	0.069	0.0555	0.1105	0.064	0.069	0.052	0.052	0.0615	0.0455	0.059	0.0535	0.0395	0.056	0.043	0.0505
41	0.0725	0.0675	0.056	0.0665	0.068	0.074	0.066	0.0635	0.06	0.0675	0.0625	0.052	0.0705	0.0665	0.0785	0.073	0.0735	0.0475	0.061	0.075	0.0625	0.057	0.067	0.0545	0.105	0.0645	0.0695	0.0505	0.051	0.0655	0.0445	0.059	0.0505	0.039	0.0575	0.0415	0.0485
41.25	0.0725	0.0685	0.057	0.0665	0.0685	0.0725	0.066	0.061	0.061	0.069	0.0625	0.051	0.0685	0.067	0.077	0.0695	0.0695	0.05	0.0605	0.075	0.07	0.054	0.0665	0.0545	0.104	0.065	0.068	0.049	0.0505	0.0645	0.046	0.0585	0.0505	0.04	0.055	0.041	0.0485
41.5	0.0755	0.0695	0.0565	0.0675	0.068	0.07	0.0665	0.064	0.0615	0.068	0.0625	0.048	0.069	0.064	0.0765	0.068	0.0665	0.0495	0.0595	0.074	0.0695	0.0535	0.0665	0.055	0.1105	0.0635	0.0675	0.0515	0.0505	0.0615	0.045	0.0575	0.0505	0.039	0.056	0.0405	0.046
41.75	0.0755	0.0685	0.0625	0.0665	0.069	0.0705	0.068	0.0625	0.0595	0.0675	0.062	0.057	0.066	0.0635	0.0785	0.0725	0.069	0.0465	0.058	0.072	0.066	0.0555	0.067	0.055	0.1035	0.0635	0.0665	0.0505	0.0525	0.074	0.045	0.0595	0.051	0.038	0.0565	0.0405	0.0485
42	0.074	0.0685	0.0635	0.069	0.0685	0.069	0.069	0.0615	0.06	0.0675	0.059	0.091	0.065	0.0715	0.0795	0.078	0.0705	0.0455	0.0575	0.0705	0.059	0.0535	0.0645	0.0545	0.106	0.062	0.0665	0.049	0.0505	0.119	0.044	0.063	0.0495	0.0375	0.055	0.04	0.048
42.25	0.0725	0.0685	0.0585	0.0665	0.0685	0.07	0.0675	0.061	0.0585	0.0695	0.0595	0.0575	0.0625	0.065	0.073	0.069	0.07	0.045	0.056	0.0725	0.066	0.0515	0.066	0.052	0.108	0.062	0.0685	0.049	0.048	0.078	0.0425	0.0575	0.0495	0.0365	0.0525	0.0395	0.0495
42.5	0.072	0.0695	0.0595	0.0645	0.0645	0.071	0.067	0.0605	0.059	0.0675	0.0595	0.0465	0.0675	0.061	0.0725	0.0655	0.0715	0.0465	0.057	0.074	0.066	0.0545	0.067	0.0545	0.1075	0.0625	0.066	0.048	0.047	0.065	0.0405	0.056	0.0495	0.037	0.054	0.039	0.047
42.75	0.0725	0.067	0.054	0.065	0.066	0.071	0.068	0.063	0.06	0.0675	0.059	0.046	0.0685	0.059	0.0755	0.0655	0.073	0.047	0.057	0.071	0.0605	0.0525	0.0625	0.053	0.1105	0.061	0.064	0.048	0.0475	0.063	0.0415	0.056	0.0495	0.037	0.054	0.04	0.048
43	0.0735	0.0685	0.058	0.0675	0.065	0.0695	0.067	0.0625	0.0615	0.0675	0.057	0.048	0.0635	0.0605	0.0755	0.0685	0.072	0.045	0.057	0.071	0.0635	0.051	0.063	0.0525	0.107	0.0615	0.0615	0.0465	0.0485	0.0625	0.0425	0.055	0.0485	0.0355	0.052	0.0395	0.049
43.25	0.0735	0.07	0.0595	0.0645	0.0665	0.069	0.068	0.059	0.059	0.068	0.06	0.0465	0.063	0.061	0.0735	0.069	0.0705	0.0455	0.0555	0.0715	0.0675	0.0495	0.061	0.053	0.1025	0.062	0.06	0.046	0.046	0.059	0.0425	0.0545	0.0465	0.0355	0.052	0.0375	0.053
43.5	0.0735	0.073	0.0635	0.0665	0.065	0.071	0.07	0.0595	0.059	0.068	0.0575	0.046	0.06	0.058	0.074	0.0645	0.069	0.043	0.0535	0.071	0.066	0.0505	0.0615	0.0505	0.1045	0.06	0.0605	0.0475	0.047	0.0605	0.042	0.0555	0.046	0.035	0.053	0.038	0.047
43.75	0.0735	0.071	0.0575	0.0675	0.065	0.0675	0.0705	0.0565	0.06	0.066	0.059	0.045	0.0605	0.057	0.073	0.0625	0.0665	0.042	0.0545	0.069	0.059	0.0485	0.062	0.0515	0.104	0.0585	0.062	0.046	0.0475	0.0615	0.0415	0.0525	0.045	0.0345	0.0515	0.039	0.043
44	0.072	0.0725	0.054	0.0665	0.0665	0.069	0.0685	0.059	0.0595	0.068	0.0585	0.044	0.0605	0.0565	0.0725	0.068	0.0645	0.0455	0.054	0.0695	0.0615	0.051	0.0625	0.052	0.1085	0.0585	0.0625	0.0445	0.0475	0.0615	0.0395	0.0545	0.045	0.035	0.0505	0.038	0.042
44.25	0.072	0.072	0.0535	0.065	0.0665	0.071	0.0675	0.059	0.0585	0.0675	0.0555	0.0465	0.0595	0.0585	0.0705	0.0685	0.0625	0.043	0.0535	0.068	0.061	0.051	0.0605	0.051	0.1095	0.06	0.0605	0.043	0.046	0.061	0.0385	0.0545	0.0445	0.0345	0.051	0.0365	0.0435
44.5	0.0725	0.071	0.0535	0.0625	0.0645	0.069	0.068	0.0605	0.059	0.067	0.0555	0.0475	0.0595	0.056	0.0715	0.065	0.0675	0.043	0.054	0.0665	0.06	0.049	0.06	0.0495	0.1085	0.0605	0.0605	0.043	0.046	0.0605	0.038	0.0525	0.0445	0.0335	0.048	0.0375	0.045
44.75	0.073	0.07	0.059	0.0615	0.0655	0.0715	0.0685	0.0615	0.0585	0.066	0.0555	0.045	0.0615	0.0505	0.0705	0.0625	0.0685	0.0445	0.0525	0.0645	0.0615	0.048	0.0595	0.0505	0.105	0.0595	0.0585	0.044	0.045	0.0565	0.037	0.053	0.048	0.0325	0.047	0.0365	0.044
45	0.0715	0.071	0.058	0.063	0.065	0.0705	0.069	0.0595	0.056	0.0655	0.054	0.045	0.1525	0.0515	0.0705	0.069	0.074	0.0415	0.0545	0.0645	0.065	0.046	0.061	0.048	0.1055	0.0595	0.058	0.0445	0.0425	0.0605	0.0385	0.0535	0.0585	0.032	0.047	0.035	0.0395
55	0.053	0.061	0.0445	0.0505	0.0495	0.058	0.0575	0.045	0.0425	0.059	0.0365	0.036	0.0475	0.0385	0.0475	0.0565	0.0535	0.032	0.04	0.0485	0.0525	0.035	0.045	0.0385	0.072	0.049	0.041	0.0335	0.0325	0.0525	0.0295	0.038	0.031	0.0205	0.0325	0.0265	0.028
55.25	0.0515	0.058	0.0475	0.0505	0.048	0.0585	0.0575	0.046	0.043	0.059	0.0375	0.0335	0.048	0.0405	0.0475	0.0565	0.0515	0.032	0.0395	0.049	0.0515	0.0345	0.0455	0.0385	0.0725	0.051	0.041	0.0325	0.033	0.0505	0.03	0.0385	0.0305	0.0205	0.033	0.025	0.029
55.5	0.052	0.062	0.045	0.051	0.048	0.061	0.057	0.043	0.043	0.059	0.0365	0.0335	0.0485	0.039	0.046	0.053	0.0535	0.0325	0.0405	0.051	0.0525	0.034	0.044	0.04	0.0745	0.049	0.0405	0.033	0.034	0.048	0.0295	0.0365	0.0315	0.02	0.0345	0.025	0.027
55.75	0.0525	0.0655	0.0465	0.0505	0.047	0.0595	0.056	0.043	0.0425	0.058	0.0355	0.034	0.0465	0.04	0.045	0.0535	0.0535	0.0325	0.0415	0.0485	0.048	0.0345	0.0455	0.04	0.0745	0.049	0.0395	0.0325	0.034	0.049	0.03	0.0365	0.0295	0.0205	0.0325	0.0245	0.025
56	0.052	0.064	0.046	0.049	0.046	0.06	0.0565	0.0445	0.0415	0.057	0.035	0.0335	0.0455	0.0375	0.0465	0.053	0.052	0.0315	0.04	0.048	0.043	0.033	0.047	0.039	0.0715	0.05	0.0405	0.0345	0.034	0.048	0.0295	0.0365	0.029	0.02	0.032	0.025	0.025
56.25	0.0525	0.0615	0.045	0.05	0.0475	0.0595	0.056	0.045	0.042	0.0585	0.0355	0.0315	0.046	0.0375	0.045	0.049	0.051	0.034	0.0405	0.047	0.0405	0.0315	0.045	0.038	0.07	0.05	0.0395	0.0335	0.0345	0.049	0.029	0.035	0.0295	0.0195	0.0325	0.025	0.025
56.5	0.0505	0.061	0.0455	0.05	0.0475	0.0595	0.0555	0.0435	0.0415	0.059	0.034	0.0335	0.048	0.039	0.0435	0.049	0.05	0.033	0.0395	0.0485	0.0405	0.032	0.044	0.037	0.0705	0.0475	0.0395	0.034	0.034	0.05	0.0285	0.0345	0.0295	0.0195	0.0325	0.0255	0.0255
56.75	0.0505	0.062	0.0465	0.0485	0.0475	0.06	0.056	0.044	0.04	0.0585	0.0345	0.0335	0.048	0.041	0.043	0.0505	0.0505	0.032	0.0405	0.0485	0.0435	0.031	0.044	0.0375	0.071	0.048	0.039	0.0325	0.0335	0.046	0.0285	0.0365	0.0295	0.019	0.031	0.0255	0.0245
57	0.0515	0.059	0.0435	0.047	0.0475	0.058	0.0545	0.0435	0.042	0.059	0.0345	0.032	0.0495	0.0385	0.0445	0.052	0.0505	0.0315	0.041	0.0485	0.045	0.032	0.045	0.0375	0.0695	0.048	0.0385	0.0325	0.034	0.048	0.029	0.0355	0.0285	0.019	0.0305	0.0255	0.0245
57.25	0.05	0.058	0.042	0.047	0.0475	0.0565	0.0545	0.0425	0.0405	0.0575	0.0345	0.0325	0.049	0.0365	0.043	0.0535	0.053	0.032	0.0405	0.0475	0.045	0.031	0.0435	0.037	0.068	0.0485	0.038	0.033	0.034	0.0475	0.029	0.0345	0.0295	0.0185	0.0305	0.024	0.023
57.5	0.0495	0.057	0.0425	0.047	0.0455	0.059	0.0545	0.0425	0.0395	0.056	0.0355	0.032	0.048	0.038	0.0415	0.0505	0.054	0.0315	0.039	0.047	0.047	0.0315	0.043	0.0365	0.066	0.0485	0.0375	0.0325	0.034	0.0465	0.0285	0.034	0.029	0.0185	0.03	0.023	0.0235
57.75	0.049	0.0615	0.047	0.047	0.0455	0.0575	0.054	0.043	0.04	0.058	0.0325	0.037	0.045	0.0405	0.0405	0.053	0.05	0.0315	0.0405	0.0485	0.046	0.0315	0.042	0.037	0.068	0.0475	0.0375	0.032	0.033	0.057	0.0285	0.036	0.028	0.0185	0.0295	0.023	0.0245
58	0.049	0.0605	0.048	0.0465	0.0455	0.0565	0.057	0.0425	0.041	0.0585	0.033	0.06	0.0445	0.049	0.0425	0.0575	0.0485	0.032	0.0415	0.0495	0.0455	0.031	0.0425	0.037	0.0705	0.048	0.0375	0.0325	0.0335	0.092	0.028	0.0385	0.028	0.0185	0.0305	0.023	0.023
58.25	0.05	0.0575	0.044	0.0455	0.0435	0.0555	0.0575	0.043	0.041	0.057	0.0335	0.038	0.045	0.04	0.0405	0.05	0.049	0.0325	0.041	0.0485	0.0425	0.03	0.0445	0.0365	0.068	0.047	0.037	0.0325	0.033	0.0595	0.0285	0.0345	0.0295	0.0185	0.0295	0.0235	0.0225
58.5	0.05	0.0565	0.0425	0.0455	0.043	0.0565	0.0555	0.0425	0.04	0.058	0.032	0.031	0.046	0.037	0.0395	0.048	0.0515	0.0315	0.038	0.0475	0.0425	0.0325	0.0425	0.0375	0.0645	0.047	0.037	0.033	0.0335	0.046	0.0275	0.0345	0.029	0.0185	0.03	0.023	0.023
58.75	0.048	0.0565	0.044	0.046	0.044	0.0565	0.0545	0.0415	0.0395	0.058	0.031	0.031	0.045	0.0355	0.0385	0.0475	0.052	0.032	0.0395	0.0465	0.0445	0.03	0.042	0.0375	0.0665	0.046	0.037	0.033	0.0325	0.044	0.0275	0.0345	0.029	0.0185	0.03	0.023	0.0225
59	0.0475	0.056	0.044	0.0425	0.0445	0.055	0.055	0.042	0.04	0.057	0.032	0.031	0.044	0.038	0.0385	0.0475	0.05	0.0305	0.039	0.0475	0.0415	0.0285	0.042	0.037	0.0665	0.048	0.0375	0.0325	0.0325	0.0455	0.028	0.0325	0.0285	0.018	0.029	0.023	0.023
59.25	0.0475	0.056	0.0435	0.0425	0.0435	0.055	0.0535	0.0405	0.0385	0.0555	0.0305	0.031	0.042	0.036	0.038	0.047	0.0495	0.0295	0.0395	0.047	0.041	0.029	0.0425	0.0365	0.0655	0.0475	0.0375	0.0325	0.0315	0.0435	0.027	0.0325	0.0275	0.018	0.029	0.0225	0.0225
59.5	0.0475	0.056	0.044	0.0435	0.0425	0.056	0.0535	0.042	0.04	0.0545	0.03	0.029	0.046	0.036	0.0375	0.047	0.05	0.0305	0.0395	0.045	0.04	0.028	0.0415	0.0365	0.067	0.046	0.0375	0.032	0.032	0.0455	0.027	0.0325	0.0275	0.017	0.0285	0.022	0.0215
59.75	0.0465	0.056	0.0405	0.0445	0.041	0.058	0.054	0.041	0.04	0.0545	0.0285	0.0285	0.045	0.037	0.0365	0.0485	0.049	0.0295	0.039	0.0455	0.041	0.03	0.0425	0.0355	0.0645	0.0455	0.0365	0.032	0.0315	0.044	0.027	0.031	0.0275	0.0175	0.0285	0.022	0.0225
60	0.0455	0.054	0.041	0.042	0.041	0.057	0.0535	0.0395	0.039	0.056	0.029	0.0295	0.0415	0.036	0.036	0.0475	0.049	0.029	0.038	0.0455	0.0435	0.03	0.042	0.035	0.0625	0.045	0.036	0.033	0.032	0.043	0.0275	0.031	0.0265	0.0175	0.029	0.0215	0.0225
60.25	0.045	0.0535	0.043	0.0415	0.043	0.0545	0.052	0.0405	0.04	0.057	0.03	0.0285	0.042	0.038	0.0365	0.047	0.05	0.0285	0.0385	0.0465	0.0385	0.028	0.0415	0.0365	0.0645	0.045	0.036	0.032	0.032	0.0415	0.027	0.0315	0.027	0.0175	0.029	0.0215	0.0215
60.5	0.0445	0.0525	0.041	0.04	0.043	0.051	0.0525	0.0405	0.0395	0.0545	0.0305	0.0285	0.042	0.037	0.035	0.049	0.049	0.03	0.039	0.048	0.0415	0.0275	0.0415	0.037	0.0635	0.0455	0.0365	0.032	0.0305	0.044	0.0265	0.031	0.0265	0.017	0.0285	0.0215	0.0215
60.75	0.045	0.0535	0.043	0.0405	0.0425	0.054	0.052	0.04	0.0385	0.0555	0.0305	0.029	0.0425	0.035	0.034	0.046	0.0485	0.029	0.0385	0.046	0.0445	0.028	0.0395	0.036	0.0615	0.046	0.0355	0.0305	0.031	0.046	0.0265	0.03	0.027	0.0165	0.028	0.021	0.021
61	0.044	0.0545	0.0395	0.0395	0.0425	0.0555	0.0525	0.0405	0.0385	0.057	0.0285	0.026	0.042	0.037	0.034	0.0455	0.0475	0.0285	0.0385	0.044	0.0405	0.028	0.0385	0.0355	0.063	0.0455	0.036	0.0305	0.0315	0.046	0.026	0.0305	0.026	0.017	0.0275	0.021	0.021
61.25	0.044	0.0545	0.037	0.039	0.0415	0.052	0.052	0.0385	0.0375	0.058	0.0285	0.026	0.0415	0.0365	0.033	0.0475	0.049	0.03	0.037	0.0425	0.037	0.0265	0.039	0.035	0.0625	0.0445	0.0355	0.0315	0.0305	0.043	0.026	0.03	0.0265	0.0165	0.0285	0.022	0.0215
61.5	0.044	0.0525	0.039	0.0405	0.041	0.053	0.053	0.038	0.0375	0.0555	0.028	0.0265	0.0405	0.0335	0.033	0.046	0.0485	0.028	0.036	0.0435	0.039	0.026	0.038	0.036	0.06	0.0435	0.0355	0.0325	0.032	0.0425	0.0265	0.03	0.0255	0.016	0.027	0.0205	0.0215
61.75	0.0425	0.052	0.039	0.0395	0.041	0.0515	0.0515	0.0385	0.038	0.0535	0.028	0.026	0.0415	0.0335	0.0325	0.0435	0.0465	0.0275	0.036	0.0435	0.039	0.027	0.039	0.035	0.0585	0.043	0.035	0.032	0.0315	0.042	0.0255	0.0295	0.0255	0.016	0.026	0.0195	0.0205
62	0.043	0.0495	0.039	0.0365	0.04	0.049	0.051	0.038	0.0375	0.054	0.028	0.025	0.0415	0.0335	0.0325	0.044	0.0475	0.0275	0.037	0.0425	0.035	0.0275	0.04	0.035	0.0595	0.044	0.0345	0.032	0.03	0.041	0.025	0.0295	0.025	0.0155	0.0275	0.0195	0.019
62.25	0.044	0.049	0.036	0.0365	0.04	0.05	0.052	0.037	0.0365	0.0545	0.0275	0.0255	0.0395	0.0335	0.0315	0.044	0.0465	0.0285	0.0375	0.0425	0.034	0.0265	0.04	0.0345	0.058	0.0435	0.034	0.0315	0.0285	0.043	0.025	0.0285	0.0255	0.0155	0.028	0.02	0.019
62.5	0.042	0.0485	0.0385	0.0365	0.0405	0.051	0.052	0.036	0.0355	0.0545	0.0265	0.026	0.04	0.0345	0.031	0.042	0.0455	0.028	0.036	0.044	0.0335	0.027	0.04	0.033	0.0575	0.0425	0.0325	0.032	0.0285	0.0415	0.0245	0.028	0.025	0.016	0.0265	0.019	0.0185
62.75	0.0415	0.0465	0.0395	0.0355	0.0405	0.05	0.051	0.0365	0.0365	0.0555	0.027	0.0285	0.0395	0.032	0.031	0.0425	0.045	0.0255	0.0365	0.042	0.0335	0.0255	0.0395	0.033	0.0595	0.0405	0.0335	0.0315	0.0295	0.04	0.0245	0.0285	0.0245	0.016	0.026	0.019	0.0185
63	0.0405	0.046	0.0395	0.036	0.0395	0.048	0.05	0.0355	0.0365	0.0535	0.0265	0.0275	0.0395	0.0335	0.0305	0.042	0.043	0.026	0.0365	0.0415	0.0345	0.025	0.038	0.0325	0.057	0.042	0.0335	0.0315	0.0295	0.0405	0.0245	0.0285	0.024	0.0155	0.025	0.019	0.0185
63.25	0.04	0.0465	0.037	0.0355	0.0375	0.048	0.0485	0.036	0.036	0.053	0.0265	0.0265	0.0405	0.0345	0.03	0.0415	0.043	0.0255	0.034	0.041	0.0345	0.0255	0.0365	0.0335	0.0565	0.042	0.034	0.0315	0.03	0.0405	0.024	0.028	0.0235	0.0145	0.0245	0.0185	0.018
63.5	0.0405	0.044	0.0365	0.0355	0.0385	0.0495	0.0495	0.036	0.035	0.054	0.0265	0.026	0.0405	0.0335	0.03	0.041	0.0455	0.0255	0.0335	0.04	0.0365	0.0255	0.036	0.0335	0.0565	0.042	0.033	0.032	0.031	0.0395	0.024	0.0285	0.023	0.0155	0.024	0.019	0.018
63.75	0.039	0.046	0.036	0.035	0.0375	0.0485	0.0495	0.0355	0.035	0.0535	0.0265	0.027	0.039	0.034	0.0295	0.0395	0.045	0.0255	0.0335	0.04	0.036	0.025	0.0375	0.033	0.0545	0.0405	0.0325	0.031	0.03	0.041	0.023	0.028	0.0235	0.0145	0.0245	0.0195	0.0175
64	0.0385	0.0485	0.0365	0.0335	0.0365	0.0475	0.05	0.0355	0.036	0.053	0.026	0.0295	0.041	0.033	0.03	0.0455	0.043	0.026	0.0325	0.039	0.0335	0.0255	0.038	0.033	0.053	0.041	0.0335	0.032	0.0295	0.0395	0.0235	0.0265	0.0235	0.0145	0.025	0.019	0.0185
64.25	0.0375	0.0435	0.036	0.033	0.0365	0.0475	0.0485	0.035	0.0345	0.0535	0.0255	0.0265	0.0445	0.032	0.029	0.042	0.045	0.025	0.0325	0.0385	0.031	0.0255	0.0365	0.033	0.053	0.041	0.032	0.031	0.0295	0.039	0.023	0.0265	0.0235	0.014	0.0255	0.0175	0.0185
64.5	0.0375	0.042	0.035	0.0325	0.0365	0.047	0.0475	0.0335	0.033	0.052	0.024	0.024	0.043	0.031	0.028	0.0415	0.0445	0.024	0.035	0.0385	0.0335	0.0235	0.0365	0.0325	0.0525	0.0405	0.0315	0.03	0.029	0.041	0.023	0.0265	0.0225	0.0145	0.025	0.0175	0.0175
64.75	0.0375	0.042	0.0335	0.031	0.036	0.0465	0.048	0.0335	0.034	0.051	0.0255	0.0235	0.041	0.031	0.0275	0.042	0.0435	0.025	0.0335	0.039	0.0335	0.0235	0.0365	0.031	0.0515	0.039	0.0315	0.029	0.029	0.04	0.0225	0.026	0.023	0.0145	0.023	0.0165	0.0175
65	0.0375	0.0415	0.035	0.03	0.0355	0.046	0.0475	0.0335	0.033	0.051	0.0255	0.024	0.037	0.032	0.0275	0.0405	0.04	0.0245	0.0325	0.037	0.031	0.023	0.036	0.0315	0.05	0.039	0.031	0.03	0.028	0.038	0.0225	0.0265	0.022	0.014	0.023	0.017	0.017
65.25	0.0355	0.042	0.032	0.0305	0.0345	0.047	0.047	0.033	0.033	0.0505	0.0245	0.023	0.036	0.031	0.028	0.04	0.0415	0.023	0.0325	0.0365	0.032	0.024	0.036	0.031	0.05	0.0385	0.032	0.031	0.0275	0.0365	0.021	0.027	0.0215	0.014	0.0235	0.017	0.017
65.5	0.0345	0.041	0.0325	0.03	0.0345	0.048	0.047	0.0325	0.0325	0.0485	0.0235	0.024	0.0375	0.0305	0.027	0.04	0.0425	0.0225	0.032	0.0365	0.031	0.0225	0.036	0.0305	0.0505	0.039	0.031	0.03	0.0275	0.038	0.021	0.0255	0.021	0.0135	0.024	0.0165	0.0165
65.75	0.0355	0.0385	0.0345	0.03	0.034	0.0445	0.0445	0.0325	0.0325	0.047	0.023	0.024	0.0365	0.03	0.0265	0.0385	0.042	0.0235	0.031	0.0365	0.032	0.0215	0.035	0.0305	0.0505	0.038	0.0295	0.029	0.028	0.038	0.022	0.0245	0.021	0.0135	0.0235	0.016	0.016
66	0.0345	0.038	0.0345	0.0295	0.0335	0.0425	0.045	0.033	0.032	0.048	0.023	0.0245	0.037	0.032	0.0255	0.0385	0.042	0.023	0.031	0.036	0.0315	0.0225	0.0335	0.03	0.051	0.0365	0.0305	0.0295	0.027	0.0405	0.0215	0.0255	0.0205	0.0135	0.023	0.0165	0.015
66.25	0.034	0.039	0.03	0.0285	0.0335	0.043	0.047	0.0315	0.031	0.0485	0.023	0.024	0.0365	0.033	0.026	0.039	0.041	0.0225	0.031	0.0375	0.0315	0.0215	0.0325	0.031	0.049	0.0365	0.029	0.029	0.0265	0.036	0.0215	0.025	0.02	0.0135	0.0225	0.016	0.0155
66.5	0.0335	0.039	0.032	0.028	0.0335	0.0425	0.0435	0.031	0.03	0.048	0.0225	0.022	0.035	0.0305	0.0255	0.0375	0.0405	0.022	0.0295	0.036	0.0285	0.0215	0.034	0.03	0.0495	0.0375	0.029	0.029	0.0275	0.035	0.021	0.024	0.0195	0.0135	0.022	0.016	0.016
66.75	0.0315	0.039	0.0335	0.028	0.033	0.0435	0.042	0.0315	0.031	0.048	0.0225	0.0215	0.0355	0.0295	0.025	0.038	0.0405	0.022	0.0295	0.035	0.026	0.0215	0.032	0.0295	0.0505	0.0365	0.0295	0.03	0.027	0.035	0.02	0.0245	0.02	0.013	0.022	0.0165	0.017
67	0.032	0.038	0.03	0.0275	0.0325	0.0425	0.042	0.0305	0.03	0.048	0.0215	0.021	0.036	0.0275	0.025	0.0375	0.0385	0.022	0.029	0.035	0.0295	0.021	0.0325	0.0285	0.049	0.036	0.0295	0.0275	0.025	0.035	0.0195	0.0235	0.0205	0.013	0.0205	0.016	0.0165
67.25	0.032	0.038	0.032	0.028	0.0305	0.04	0.0425	0.0295	0.0295	0.046	0.0215	0.021	0.035	0.0265	0.025	0.0365	0.039	0.0215	0.028	0.0345	0.0275	0.0205	0.034	0.0295	0.0465	0.0365	0.029	0.028	0.025	0.037	0.0195	0.0235	0.0195	0.0125	0.02	0.015	0.015
67.5	0.0325	0.036	0.0315	0.0265	0.0305	0.04	0.0425	0.029	0.0305	0.047	0.0215	0.022	0.034	0.0285	0.024	0.0355	0.0385	0.022	0.0285	0.0345	0.027	0.0205	0.033	0.0295	0.046	0.036	0.0285	0.0275	0.0255	0.0345	0.02	0.023	0.0195	0.013	0.0215	0.015	0.0135
67.75	0.0315	0.036	0.0305	0.026	0.031	0.0405	0.0425	0.0285	0.0295	0.047	0.021	0.0215	0.0325	0.029	0.0235	0.0355	0.037	0.0225	0.028	0.034	0.028	0.0205	0.032	0.0285	0.045	0.0355	0.0275	0.027	0.026	0.035	0.0195	0.0235	0.019	0.012	0.0215	0.015	0.0135
68	0.0305	0.0365	0.031	0.0255	0.031	0.0405	0.0435	0.028	0.0285	0.0455	0.0205	0.0225	0.0325	0.0305	0.0235	0.035	0.036	0.021	0.0265	0.034	0.0275	0.02	0.0315	0.029	0.047	0.036	0.027	0.0265	0.0245	0.037	0.0195	0.0235	0.0185	0.012	0.0205	0.0155	0.015
68.25	0.029	0.0345	0.0295	0.0245	0.0305	0.0415	0.041	0.028	0.028	0.0435	0.0205	0.021	0.0335	0.03	0.023	0.038	0.0375	0.02	0.0265	0.0325	0.029	0.0195	0.0315	0.0285	0.0475	0.0335	0.027	0.0285	0.0255	0.0335	0.0185	0.022	0.0185	0.012	0.019	0.015	0.0145
68.5	0.0295	0.035	0.03	0.0245	0.03	0.0405	0.039	0.0275	0.027	0.044	0.0215	0.02	0.032	0.0275	0.024	0.0365	0.0375	0.0205	0.028	0.033	0.0275	0.0195	0.0315	0.0285	0.0435	0.0325	0.0265	0.028	0.025	0.0345	0.0185	0.0225	0.018	0.012	0.019	0.014	0.014
68.75	0.0285	0.0355	0.03	0.025	0.029	0.0405	0.039	0.0275	0.028	0.045	0.0215	0.019	0.0335	0.0265	0.0225	0.0345	0.0375	0.0195	0.0265	0.0335	0.0265	0.0195	0.0305	0.0275	0.042	0.033	0.0265	0.0265	0.0245	0.035	0.018	0.022	0.018	0.0115	0.0185	0.014	0.015
69	0.028	0.0335	0.0315	0.0245	0.029	0.0375	0.0395	0.027	0.027	0.043	0.0205	0.0205	0.0335	0.0275	0.0225	0.0345	0.036	0.021	0.0255	0.0325	0.026	0.0185	0.0305	0.027	0.043	0.0335	0.0255	0.0255	0.0245	0.033	0.018	0.022	0.0175	0.011	0.019	0.0135	0.0145
69.25	0.028	0.034	0.0315	0.0245	0.0295	0.0355	0.04	0.0265	0.0265	0.042	0.0205	0.0205	0.032	0.027	0.022	0.0345	0.0355	0.02	0.0265	0.0305	0.024	0.018	0.0295	0.027	0.0415	0.0335	0.026	0.025	0.024	0.0325	0.0185	0.0215	0.0175	0.011	0.019	0.0135	0.014
69.5	0.028	0.0345	0.0305	0.024	0.0285	0.036	0.0375	0.027	0.0265	0.0415	0.0195	0.0195	0.032	0.0255	0.022	0.032	0.0355	0.019	0.026	0.0305	0.023	0.018	0.0285	0.026	0.0405	0.032	0.0255	0.0255	0.0225	0.0355	0.018	0.0215	0.018	0.011	0.0185	0.0135	0.014
69.75	0.027	0.0335	0.0285	0.0235	0.0275	0.036	0.0375	0.026	0.0265	0.0415	0.0185	0.019	0.0335	0.0265	0.0225	0.033	0.0345	0.019	0.025	0.0305	0.0235	0.018	0.0285	0.026	0.0415	0.0315	0.0245	0.0265	0.0235	0.035	0.018	0.021	0.019	0.011	0.019	0.013	0.013
70	0.0275	0.0325	0.028	0.024	0.0275	0.0355	0.037	0.026	0.0255	0.0415	0.018	0.0205	0.033	0.028	0.0215	0.034	0.0345	0.0185	0.0245	0.0315	0.024	0.0175	0.0285	0.026	0.041	0.031	0.0245	0.0265	0.023	0.032	0.017	0.021	0.0165	0.011	0.0185	0.013	0.0135
70.25	0.0265	0.0325	0.0275	0.023	0.0275	0.035	0.036	0.024	0.025	0.0395	0.0185	0.0195	0.031	0.025	0.0205	0.033	0.034	0.018	0.0255	0.03	0.0245	0.0175	0.0275	0.025	0.0405	0.031	0.0235	0.0245	0.0225	0.032	0.017	0.0205	0.0175	0.0105	0.0185	0.013	0.0135
70.5	0.026	0.032	0.0285	0.0215	0.027	0.036	0.0355	0.023	0.0245	0.04	0.018	0.02	0.0315	0.0235	0.021	0.031	0.034	0.0175	0.025	0.0285	0.0215	0.0165	0.028	0.0255	0.0415	0.0305	0.024	0.0235	0.021	0.032	0.016	0.021	0.0175	0.0105	0.0185	0.013	0.0125
70.75	0.0255	0.03	0.0285	0.0215	0.026	0.036	0.036	0.0245	0.0245	0.04	0.019	0.0185	0.0365	0.024	0.0205	0.032	0.032	0.017	0.025	0.0285	0.0215	0.0165	0.0265	0.025	0.0385	0.029	0.023	0.0235	0.0215	0.0315	0.016	0.02	0.016	0.0105	0.0185	0.0125	0.013
71	0.0245	0.029	0.0275	0.0215	0.026	0.0345	0.0355	0.0245	0.0245	0.039	0.018	0.0195	0.044	0.025	0.0195	0.0315	0.0325	0.018	0.0245	0.028	0.022	0.0165	0.027	0.0245	0.039	0.0295	0.022	0.0225	0.021	0.032	0.0165	0.0195	0.015	0.0105	0.017	0.012	0.013
71.25	0.0245	0.0295	0.0275	0.0205	0.0255	0.0325	0.036	0.0245	0.024	0.039	0.0175	0.0205	0.0375	0.0245	0.0195	0.0295	0.0325	0.018	0.0225	0.027	0.0225	0.016	0.0265	0.0235	0.04	0.029	0.023	0.0215	0.02	0.0295	0.016	0.019	0.016	0.0105	0.017	0.012	0.013
71.5	0.025	0.028	0.026	0.0205	0.0245	0.032	0.0355	0.0235	0.0225	0.0385	0.0165	0.019	0.0415	0.0235	0.02	0.0305	0.031	0.017	0.023	0.0275	0.023	0.0155	0.0265	0.024	0.0395	0.0285	0.022	0.022	0.02	0.0305	0.0155	0.019	0.016	0.0105	0.018	0.012	0.0125
71.75	0.024	0.029	0.0255	0.02	0.0255	0.032	0.0335	0.023	0.022	0.0385	0.0165	0.018	0.0345	0.024	0.019	0.0325	0.0295	0.017	0.023	0.027	0.022	0.0155	0.0265	0.024	0.04	0.028	0.022	0.022	0.0195	0.03	0.016	0.019	0.0155	0.01	0.017	0.0115	0.012
72	0.0235	0.0275	0.026	0.02	0.0245	0.0315	0.0325	0.0225	0.022	0.0385	0.0165	0.018	0.032	0.024	0.0195	0.032	0.03	0.016	0.0225	0.0265	0.0205	0.0165	0.0255	0.024	0.0375	0.028	0.0215	0.0215	0.0195	0.0295	0.0155	0.0185	0.014	0.01	0.017	0.0115	0.012
72.25	0.023	0.0265	0.0275	0.019	0.0235	0.0305	0.0325	0.0235	0.0215	0.038	0.0165	0.0175	0.0305	0.0215	0.0185	0.0305	0.031	0.0155	0.022	0.0265	0.0195	0.015	0.024	0.024	0.036	0.028	0.021	0.0215	0.019	0.0285	0.015	0.0185	0.0135	0.01	0.0165	0.0115	0.0115
72.5	0.0235	0.0265	0.026	0.0185	0.023	0.029	0.032	0.022	0.0215	0.0365	0.016	0.018	0.0305	0.0225	0.018	0.0295	0.031	0.015	0.022	0.0255	0.0195	0.014	0.024	0.023	0.0375	0.0265	0.0215	0.0205	0.0185	0.029	0.015	0.0185	0.014	0.0095	0.0165	0.011	0.011
72.75	0.0225	0.0255	0.025	0.0185	0.023	0.0305	0.031	0.0205	0.022	0.0365	0.016	0.0185	0.0295	0.023	0.018	0.0305	0.03	0.015	0.022	0.0255	0.019	0.014	0.0235	0.0225	0.036	0.027	0.0205	0.02	0.0185	0.029	0.0145	0.018	0.014	0.0095	0.016	0.011	0.0115
73	0.0215	0.025	0.023	0.0185	0.023	0.029	0.03	0.0205	0.0215	0.0365	0.016	0.0175	0.032	0.022	0.018	0.03	0.03	0.015	0.0215	0.025	0.0195	0.014	0.024	0.0215	0.0355	0.0265	0.0205	0.0205	0.019	0.029	0.0145	0.0175	0.0135	0.009	0.0155	0.0115	0.012
73.25	0.021	0.0245	0.0235	0.018	0.022	0.029	0.0295	0.021	0.0205	0.0365	0.016	0.0175	0.034	0.0215	0.0175	0.0285	0.029	0.0155	0.0215	0.024	0.02	0.0145	0.024	0.0215	0.0355	0.0265	0.02	0.02	0.019	0.0285	0.014	0.018	0.014	0.009	0.0155	0.011	0.0115
73.5	0.0215	0.025	0.0235	0.018	0.022	0.028	0.0295	0.0205	0.021	0.034	0.0155	0.0175	0.031	0.0205	0.018	0.03	0.0275	0.015	0.02	0.0245	0.019	0.014	0.023	0.0215	0.0365	0.026	0.0195	0.0195	0.0185	0.028	0.0135	0.0175	0.0135	0.009	0.0155	0.0105	0.011
73.75	0.021	0.0245	0.024	0.0175	0.0215	0.028	0.0295	0.0195	0.0205	0.033	0.0155	0.0165	0.0305	0.0205	0.017	0.0295	0.0265	0.0155	0.02	0.024	0.019	0.0135	0.023	0.0225	0.0335	0.0255	0.019	0.0195	0.0175	0.028	0.0135	0.017	0.013	0.009	0.015	0.0105	0.011
74	0.0205	0.025	0.0245	0.0175	0.0205	0.028	0.0295	0.019	0.02	0.0335	0.0155	0.0175	0.0295	0.0215	0.0165	0.0295	0.0265	0.016	0.0205	0.024	0.019	0.0135	0.0225	0.021	0.0315	0.0245	0.0185	0.019	0.018	0.0285	0.0135	0.017	0.0125	0.0085	0.0145	0.01	0.011
74.25	0.02	0.026	0.0225	0.0175	0.0205	0.0275	0.0285	0.0185	0.0205	0.0325	0.0155	0.017	0.0285	0.021	0.016	0.0315	0.0265	0.0145	0.0205	0.0245	0.0175	0.0125	0.022	0.021	0.033	0.025	0.018	0.0185	0.0175	0.026	0.013	0.0165	0.012	0.0085	0.015	0.01	0.011
74.5	0.02	0.025	0.022	0.017	0.02	0.0265	0.027	0.019	0.02	0.031	0.015	0.017	0.0275	0.021	0.0155	0.0285	0.026	0.014	0.019	0.023	0.018	0.013	0.021	0.0205	0.033	0.025	0.018	0.018	0.017	0.0275	0.013	0.017	0.012	0.0085	0.0145	0.0105	0.0095
74.75	0.0195	0.0235	0.022	0.017	0.019	0.025	0.027	0.018	0.0195	0.0315	0.015	0.015	0.0275	0.021	0.016	0.0285	0.026	0.0145	0.0185	0.022	0.019	0.013	0.021	0.02	0.0325	0.0245	0.018	0.0175	0.0175	0.0275	0.0125	0.0165	0.012	0.008	0.014	0.0105	0.0095
75	0.019	0.0235	0.0225	0.0165	0.019	0.025	0.027	0.0175	0.019	0.0315	0.014	0.015	0.0275	0.02	0.0155	0.028	0.0245	0.013	0.019	0.0215	0.018	0.013	0.021	0.02	0.032	0.024	0.0185	0.0165	0.0175	0.025	0.012	0.016	0.0115	0.008	0.0145	0.0105	0.0105
75.25	0.019	0.0235	0.0215	0.016	0.0185	0.025	0.0265	0.017	0.0185	0.0305	0.014	0.016	0.0265	0.0185	0.015	0.026	0.0265	0.014	0.0185	0.0215	0.019	0.012	0.02	0.0195	0.0305	0.0235	0.017	0.017	0.0165	0.026	0.012	0.016	0.0115	0.0085	0.015	0.01	0.011
75.5	0.0185	0.022	0.0215	0.016	0.018	0.024	0.026	0.017	0.0175	0.03	0.014	0.016	0.0275	0.0185	0.015	0.027	0.026	0.013	0.018	0.021	0.018	0.0115	0.02	0.0185	0.03	0.023	0.017	0.0175	0.016	0.026	0.0115	0.0155	0.011	0.008	0.0135	0.0095	0.0105
75.75	0.018	0.022	0.0195	0.015	0.018	0.0235	0.0255	0.017	0.0175	0.03	0.014	0.015	0.027	0.0195	0.0155	0.0265	0.024	0.0125	0.018	0.02	0.0175	0.011	0.0195	0.019	0.0285	0.023	0.0165	0.0165	0.016	0.0265	0.012	0.0155	0.012	0.008	0.0135	0.009	0.01
76	0.0185	0.0215	0.0195	0.015	0.018	0.023	0.025	0.0165	0.0175	0.029	0.0135	0.016	0.026	0.0175	0.0155	0.027	0.025	0.0125	0.0175	0.02	0.0175	0.0105	0.0195	0.0185	0.0285	0.0225	0.017	0.015	0.016	0.026	0.011	0.015	0.011	0.008	0.0135	0.009	0.0095
76.25	0.018	0.0205	0.0205	0.0145	0.018	0.0225	0.0245	0.0165	0.018	0.029	0.0135	0.015	0.0265	0.0175	0.015	0.0265	0.024	0.0125	0.0165	0.021	0.0175	0.0105	0.018	0.0175	0.029	0.0225	0.016	0.0155	0.016	0.0245	0.011	0.0145	0.011	0.008	0.013	0.0085	0.0095
76.5	0.0165	0.02	0.0205	0.0145	0.017	0.023	0.024	0.016	0.017	0.029	0.013	0.0145	0.026	0.018	0.0145	0.0265	0.023	0.013	0.017	0.0205	0.016	0.0105	0.0185	0.017	0.027	0.022	0.0155	0.0155	0.015	0.025	0.0105	0.0145	0.0105	0.008	0.0125	0.009	0.0095
76.75	0.017	0.0205	0.0215	0.0145	0.0165	0.022	0.0235	0.016	0.0165	0.0275	0.013	0.014	0.026	0.0175	0.014	0.0255	0.0225	0.0125	0.0175	0.0195	0.016	0.011	0.018	0.0165	0.027	0.021	0.0155	0.0145	0.015	0.025	0.011	0.015	0.0105	0.0075	0.0125	0.0085	0.009
77	0.017	0.02	0.0205	0.014	0.0165	0.0215	0.022	0.0155	0.016	0.026	0.012	0.014	0.026	0.0175	0.0135	0.0235	0.022	0.012	0.0165	0.0195	0.016	0.0105	0.018	0.017	0.027	0.021	0.0155	0.0145	0.015	0.024	0.011	0.0145	0.0105	0.0075	0.0115	0.0085	0.0085
77.25	0.0165	0.0205	0.0205	0.0135	0.0155	0.0215	0.0225	0.015	0.0165	0.027	0.012	0.014	0.0245	0.0165	0.013	0.0245	0.0235	0.011	0.016	0.019	0.015	0.01	0.0175	0.017	0.026	0.0205	0.0155	0.014	0.014	0.0245	0.0105	0.014	0.01	0.007	0.0125	0.0085	0.009
77.5	0.016	0.0195	0.019	0.013	0.0155	0.021	0.022	0.0145	0.016	0.0265	0.012	0.0135	0.0255	0.0165	0.013	0.025	0.023	0.0115	0.016	0.018	0.016	0.01	0.017	0.016	0.025	0.0205	0.0145	0.013	0.0145	0.022	0.0105	0.014	0.0105	0.007	0.012	0.008	0.009
77.75	0.016	0.0205	0.018	0.013	0.0145	0.0195	0.0215	0.015	0.016	0.0255	0.0115	0.0135	0.0245	0.016	0.013	0.025	0.0215	0.011	0.016	0.0185	0.016	0.0095	0.017	0.0155	0.025	0.0205	0.014	0.013	0.014	0.0215	0.01	0.0135	0.01	0.0065	0.011	0.008	0.0085
78	0.016	0.0195	0.0175	0.013	0.0145	0.0195	0.0215	0.0145	0.0155	0.0255	0.0115	0.014	0.025	0.0155	0.013	0.0245	0.0205	0.011	0.0155	0.0175	0.0155	0.0095	0.0165	0.0155	0.0245	0.019	0.0135	0.0125	0.0135	0.022	0.01	0.013	0.0095	0.0065	0.0115	0.008	0.008
78.25	0.015	0.0175	0.0185	0.013	0.015	0.019	0.021	0.0135	0.015	0.0245	0.0115	0.013	0.025	0.0155	0.012	0.023	0.021	0.0105	0.0155	0.017	0.014	0.009	0.016	0.0155	0.0245	0.0195	0.014	0.013	0.0135	0.0225	0.01	0.0135	0.009	0.007	0.0115	0.008	0.0085
78.5	0.0145	0.018	0.017	0.012	0.0145	0.019	0.0205	0.0135	0.014	0.0235	0.0115	0.012	0.0265	0.0155	0.012	0.022	0.0205	0.0105	0.015	0.017	0.0125	0.009	0.016	0.015	0.0245	0.018	0.013	0.013	0.0125	0.021	0.0095	0.0125	0.009	0.0065	0.0105	0.0075	0.0085
78.75	0.0145	0.018	0.018	0.012	0.014	0.018	0.02	0.0135	0.014	0.023	0.011	0.013	0.024	0.0145	0.0125	0.022	0.019	0.011	0.014	0.017	0.013	0.0085	0.0155	0.0145	0.0225	0.018	0.013	0.0125	0.0125	0.0205	0.009	0.0125	0.009	0.0065	0.0105	0.0075	0.008
79	0.0145	0.018	0.017	0.012	0.0135	0.018	0.0205	0.013	0.0135	0.022	0.0105	0.0125	0.0235	0.015	0.0125	0.022	0.019	0.01	0.0145	0.0165	0.0125	0.009	0.0155	0.0145	0.023	0.0175	0.0125	0.012	0.0125	0.0215	0.009	0.0125	0.009	0.006	0.0105	0.007	0.0085
79.25	0.014	0.0165	0.017	0.0115	0.0135	0.017	0.0195	0.0125	0.013	0.0215	0.0105	0.013	0.0225	0.0145	0.012	0.022	0.0185	0.0105	0.0135	0.0165	0.013	0.0085	0.0145	0.014	0.023	0.0175	0.012	0.011	0.0115	0.0205	0.0085	0.0125	0.008	0.0065	0.01	0.007	0.0075
79.5	0.0135	0.0165	0.017	0.011	0.013	0.0175	0.019	0.0125	0.013	0.0215	0.01	0.012	0.022	0.014	0.012	0.0215	0.019	0.0105	0.0135	0.016	0.0125	0.0085	0.0145	0.0135	0.0215	0.017	0.012	0.011	0.012	0.02	0.0085	0.0125	0.008	0.006	0.01	0.007	0.007
79.75	0.013	0.016	0.0165	0.011	0.0125	0.017	0.0185	0.0125	0.013	0.022	0.0095	0.0115	0.0215	0.015	0.0115	0.022	0.018	0.01	0.0125	0.0155	0.013	0.008	0.0145	0.013	0.0215	0.016	0.012	0.011	0.0115	0.02	0.008	0.0115	0.008	0.006	0.0095	0.007	0.007
80	0.012	0.0155	0.0155	0.0105	0.0125	0.0165	0.0175	0.0115	0.0125	0.0215	0.0095	0.011	0.022	0.0145	0.011	0.021	0.017	0.0095	0.0125	0.0155	0.0115	0.0075	0.014	0.013	0.021	0.016	0.012	0.011	0.0115	0.019	0.008	0.0115	0.008	0.006	0.01	0.0065	0.0075

## Sheet: Fig6-B TPF during TDW dark BL
Theta peak frequency (TPF) during theta dominated waking (TDW) epochs in the dark phases of the baseline days
	mID	WT	mID	KO
	_1WT_NO_CIRP03	8.1331	_2KO_NO_CIRP01	7.6183
	_1WT_NO_CIRP04	7.6363	_2KO_NO_CIRP10	8.22895
	_1WT_NO_CIRP05	8.06095	_2KO_NO_CIRP13	8.3943
	_1WT_NO_CIRP09	7.8204	_2KO_NO_CIRP14	8.73175
	_1WT_NO_CIRP11	8.19465	_2KO_NO_CIRP15	8.3893
	_1WT_NO_CIRP18	8.0647	_2KO_NO_CIRP20	7.8962
	_1WT_NO_CIRP19	7.97335	_2KO_NO_CIRP25	8.39395
	_1WT_NO_CIRP29	8.11825	_2KO_NO_CIRP40	8.3669
	_1WT_NO_CIRP30	8.10635	_2KO_NO_CIRP50	8.1331
	_1WT_NO_CIRP31	8.4469	_2KO_YS_TC01	8.23915
	_1WT_NO_CIRP48	8.1614	_2KO_YS_TC07	8.30485
	_1WT_YS_TC03	8.2955	_2KO_YS_TC10	8.6401
	_1WT_YS_TC06	8.29755	_2KO_YS_TC15	8.0047
	_1WT_YS_TC08	8.06875	_2KO_YS_TC16	8.5554
	_1WT_YS_TC09	8.4069	_2KO_YS_TC17	8.6731
	_1WT_YS_TC12	8.1837	_2KO_YS_TC19	8.1491
	_1WT_YS_TC13	8.1678	_2KO_YS_TC20	8.14205
	_1WT_YS_TC18	8.1078
	_1WT_YS_TC21	8.2992
	_1WT_YS_TC22	7.9787

## Sheet: Fig6-C TPF-LMA
data used to assess an association between theta peak frequency (TPF) and locomotor activity (LMA). There are two data-points (TPF and log2(LMA)) for each mouse, based on the dark phase baseline data
for the correlation, the log2 transformed data (LogAct, columnG) are used
	GT	mID	Therm	TPFreq	Act	LogAct
	WT	CIRP03	NO	8.1331	1458	10.5081
	WT	CIRP04	NO	7.6363	175	7.45083
	WT	CIRP05	NO	7.8204	583	9.18632
	WT	CIRP09	NO	8.06095	1010.5	9.84297
	WT	CIRP11	NO	8.19465	1759	10.7734
	WT	CIRP18	NO	8.0647	804.5	9.65054
	WT	CIRP19	NO	7.97335	1146.5	10.1363
	WT	CIRP29	NO	8.11825	771.5	9.5889
	WT	CIRP30	NO	8.10635	655	9.35006
	WT	CIRP31	NO	8.4469	713.5	9.46061
	WT	CIRP48	NO	8.1614	461	8.8485
	WT	TC03	YS	8.29755	347.5	8.40108
	WT	TC06	YS	8.2955	733	9.4924
	WT	TC08	YS	8.06875	466.5	8.86472
	WT	TC12	YS	8.1837	1176	10.1941
	WT	TC13	YS	8.1678	305.5	8.2317
	WT	TC18	YS	7.9787	476	8.87518
	KO	CIRP01	NO	7.6183	88.5	6.41009
	KO	CIRP10	NO	8.22895	1665.5	10.7016
	KO	CIRP13	NO	8.3943	763	9.57178
	KO	CIRP14	NO	8.73175	2412	11.2351
	KO	CIRP15	NO	8.3893	1273.5	10.3136
	KO	CIRP20	NO	7.8962	452.5	8.80086
	KO	CIRP25	NO	8.39395	2619.5	11.3486
	KO	CIRP40	NO	8.1062	757	9.56407
	KO	CIRP50	NO	8.3669	712	9.45599
	KO	TC01	YS	8.23915	1153	10.1594
	KO	TC07	YS	8.30485	1200.5	10.2248
	KO	TC10	YS	8.6401	1919	10.904
	KO	TC15	YS	8.0047	854.5	9.72165
	KO	TC16	YS	8.6731	3337.5	11.7026
	KO	TC17	YS	8.1491	1127	10.1371
	KO	TC19	YS	8.14205	1345.5	10.3862
