# Supplementary material for: Cold-inducible RNA-binding protein (CIRBP) adjusts clock-gene expression and REM-sleep recovery following sleep deprivation
Source: eLife. 2019 Feb 5;8:e43400. doi: 10.7554/eLife.43400 (PMC6379088; doi:10.7554/eLife.43400)
Supplement: Figure 7—source data 1. [file elife-43400-fig7-data1.xlsx]

## Sheet: Sheet1
this data was used to construct figure 7
see material and methods
	mID	Genotype	Tcx	Amplitude
	TC01	KO	35.086	1.99
	TC07	KO	37.372	2.465
	TC15	KO	36.292	2.435
	TC16	KO	36.574	2.42
	TC17	KO	36.79	1.92
	TC19	KO	36.834	1.54
	TC20	KO	38.656	0.575
	TC03	WT	36.406	2.09
	TC06	WT	37.004	2.34
	TC08	WT	34.24	2.125
	TC09	WT	36.694	2.765
	TC12	WT	34.878	2.375
	TC13	WT	36.614	2.25
	TC22	WT	38.786	0.895
		detected outliers
