# Supplementary figures and images for: Cold-inducible RNA-binding protein (CIRBP) adjusts clock-gene expression and REM-sleep recovery following sleep deprivation
Source: eLife journal article supplement (doi:10.7554/elife.43400), 2019-02-05

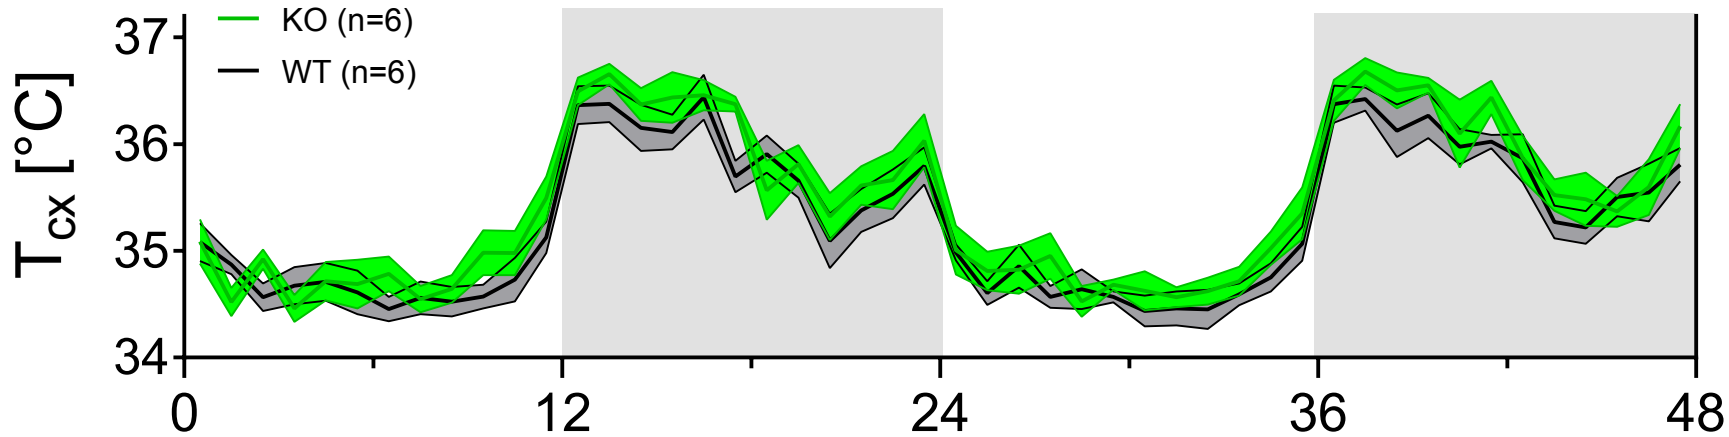

Supplement: supp [file elife_poa_e43400_Figure_3_figure_supplement_1.pdf › elife_poa_e43400_Figure_3_figure_supplement_1.pdf]

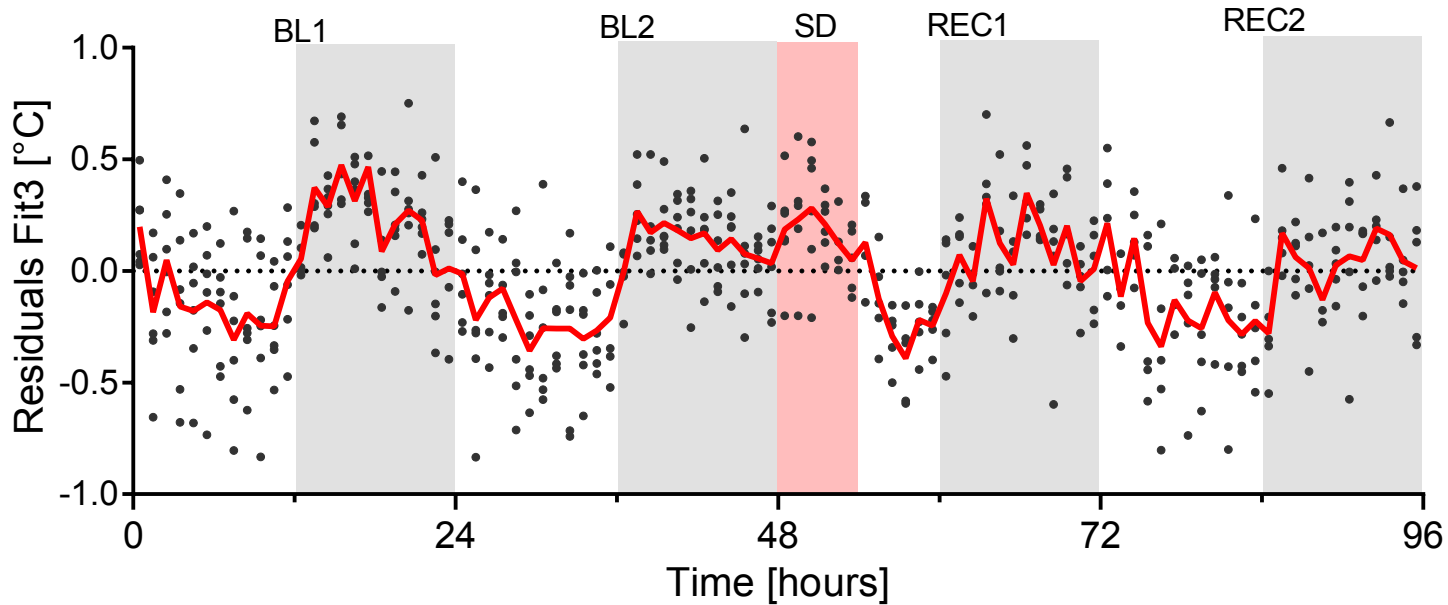

Supplement: supp [file elife_poa_e43400_Figure_3_figure_supplement_2.pdf › elife_poa_e43400_Figure_3_figure_supplement_2.pdf]

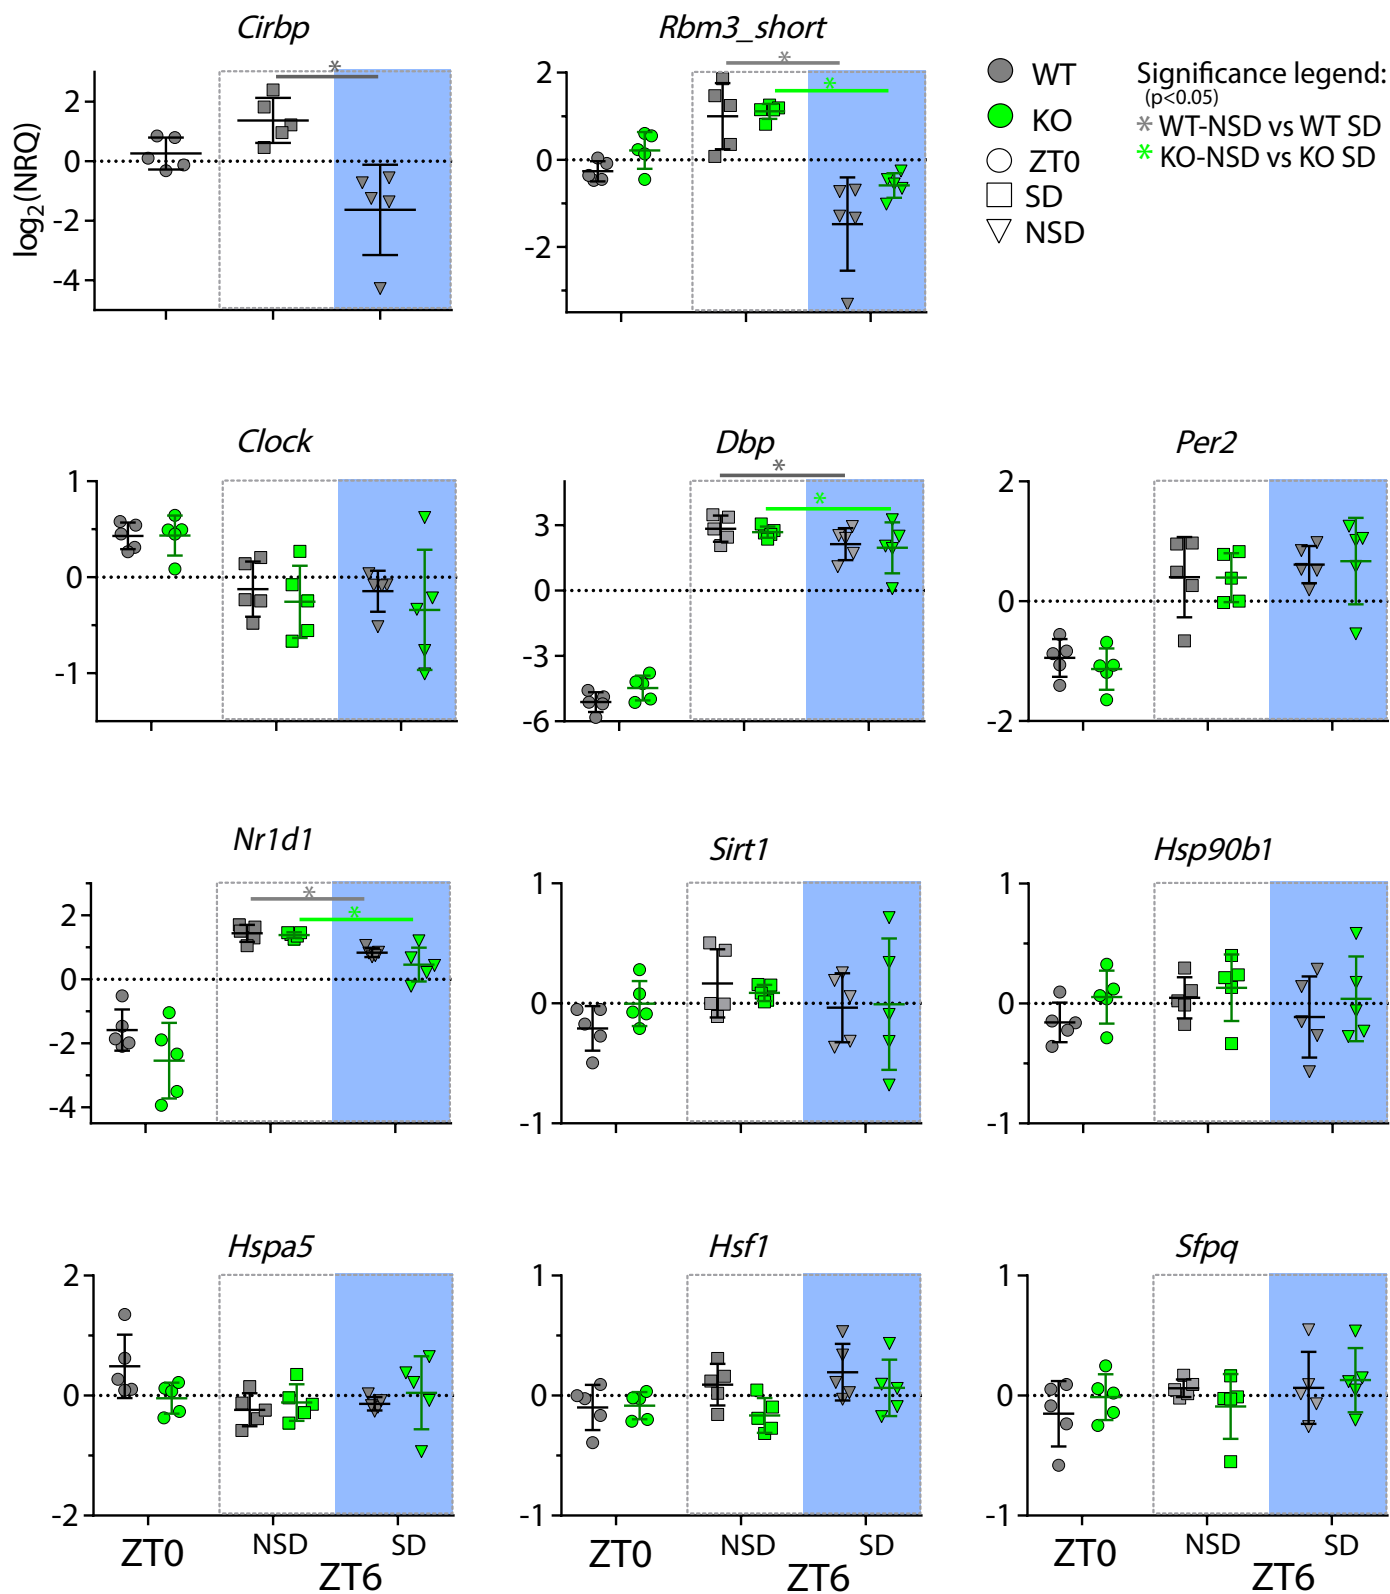

Supplement: supp [file elife_poa_e43400_Figure_4_figure_supplement_1.pdf › elife_poa_e43400_Figure_4_figure_supplement_1.pdf]

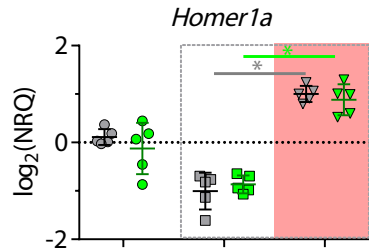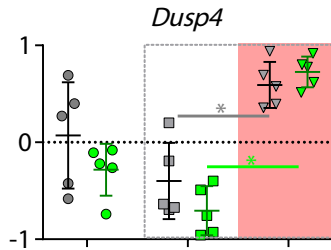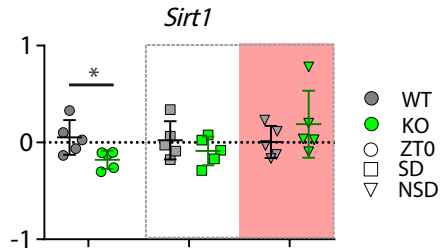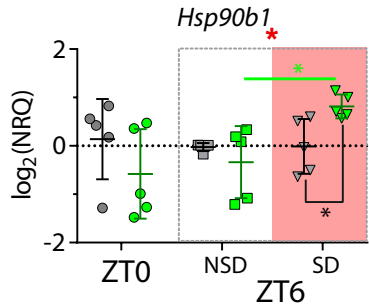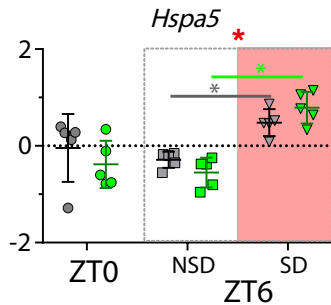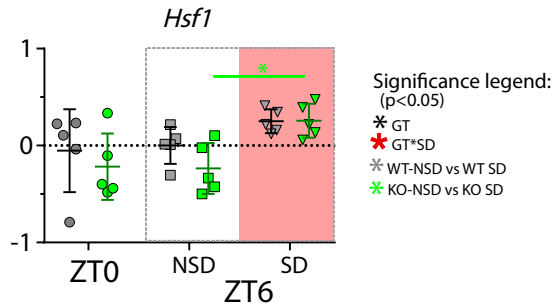

Supplement: supp [file elife_poa_e43400_Figure_4_figure_supplement_2.pdf › elife_poa_e43400_Figure_4_figure_supplement_2.pdf]

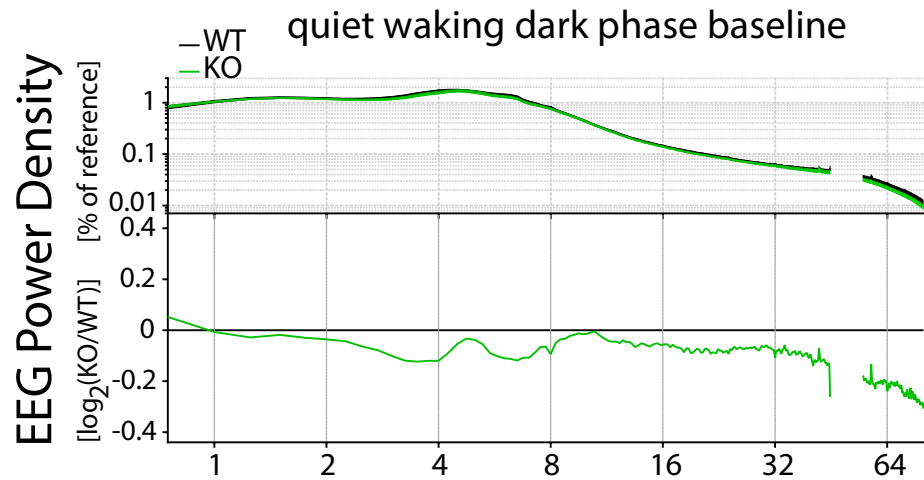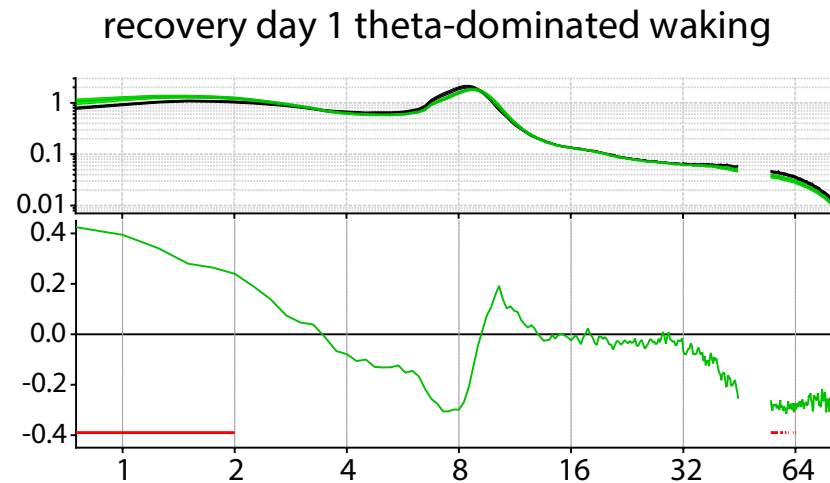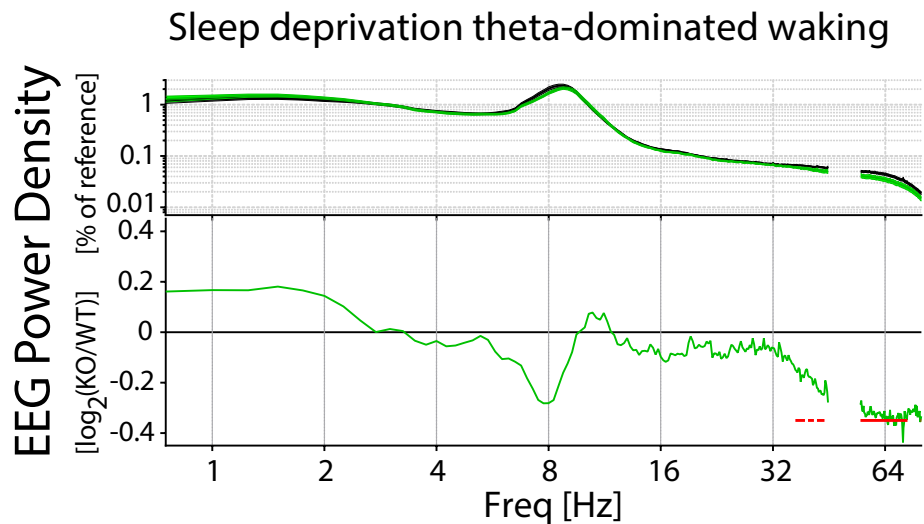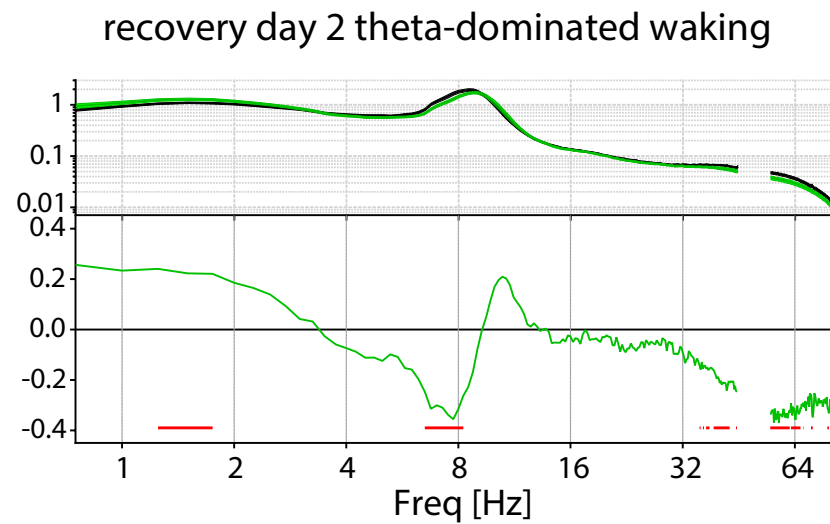

Supplement: supp [file elife_poa_e43400_Figure_6_figure_supplement_1.pdf › elife_poa_e43400_Figure_6_figure_supplement_1.pdf]

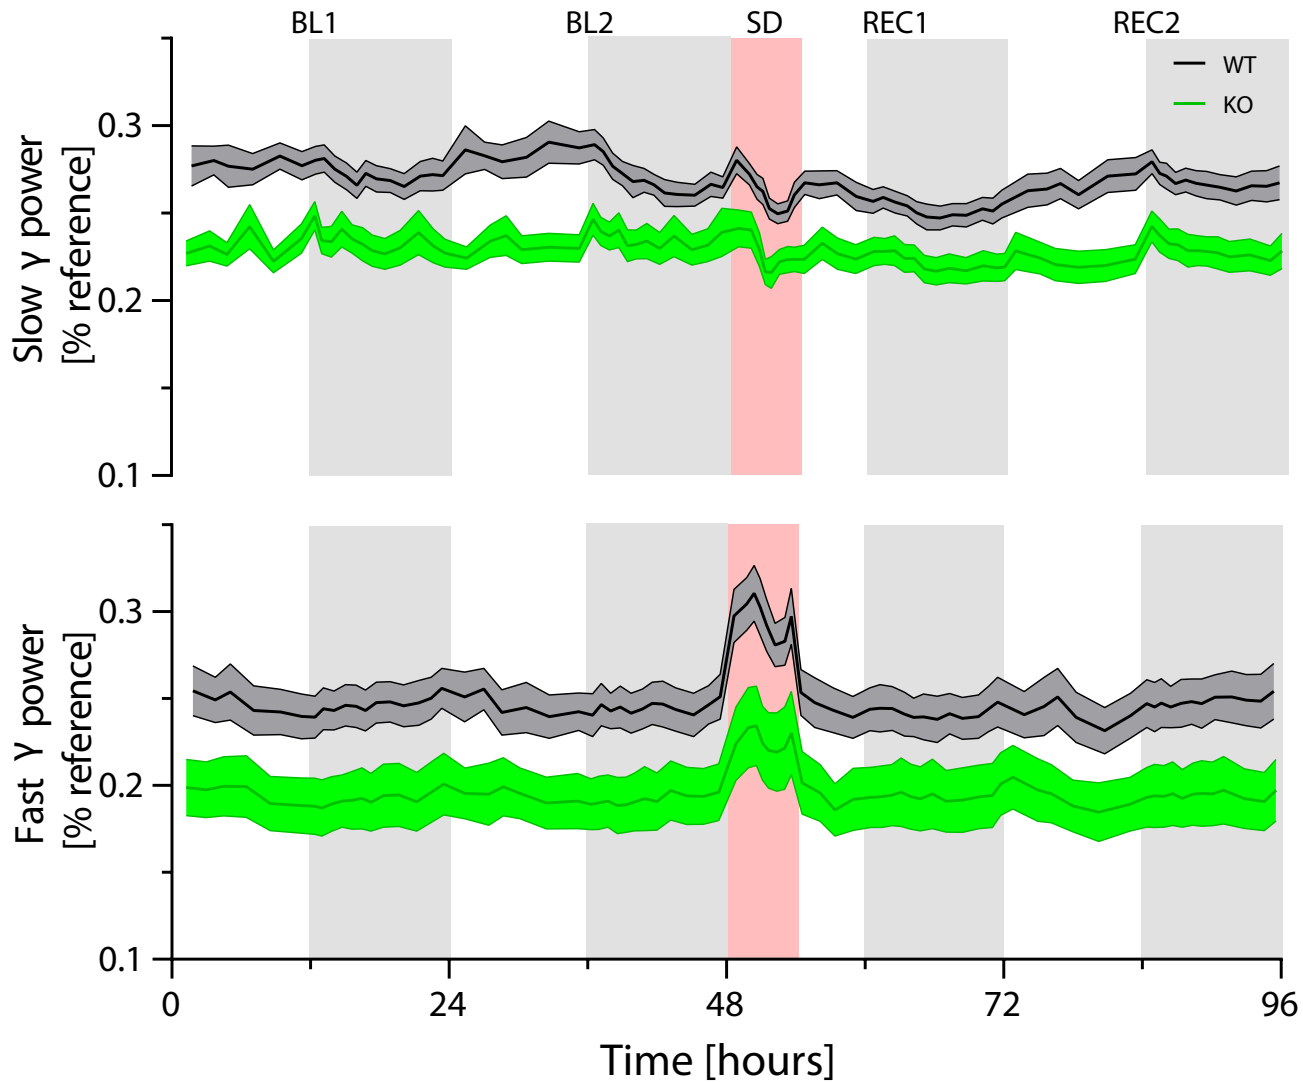

Supplement: supp [file elife_poa_e43400_Figure_6_figure_supplement_2.pdf › elife_poa_e43400_Figure_6_figure_supplement_2.pdf]
